# Supplementary material for: Assessing of evapotranspiration models using limited climatic data in Southeast Anatolian Project Region of Turkey
Source: PeerJ. 2021 Jun 9;9:e11571. doi: 10.7717/peerj.11571 (PMC8197036; doi:10.7717/peerj.11571)
Supplement: Supplemental Information 1 [file peerj-09-11571-s001.xls]

## Sheet: ETo
Daily ETo estimates (mm/day)					Original Penman	FAO-Penman		FAO-Radiation		Blaney-Criddle	Hargreaves
YEAR	MON	DAY	DOY	PM	PEN	FAOP	PT	FAOR	FAOB	SCSB	HARG	Epan	PMD
2003	1	1	1	0.6	0.9	0.9	0.6	0.2	0.2	0.8	0.8	-999	0.7
2003	1	2	2	0.6	0.7	0.7	0.6	-0.1	0.1	0.9	0.7	-999	0.6
2003	1	3	3	0.5	0.7	0.7	0.6	-0.1	0.1	1	0.6	-999	0.6
2003	1	4	4	0.9	1.1	1.2	0.6	-0.2	0.1	1.1	0.6	-999	1.1
2003	1	5	5	0.8	0.9	1	0.6	0	0.2	1.2	0.7	-999	0.9
2003	1	6	6	0.8	0.9	0.9	1	1.3	0.7	1.8	1.2	-999	0.8
2003	1	7	7	0.8	1.3	1.3	0.7	0.7	1	1.5	0.8	-999	0.9
2003	1	8	8	0.8	1.1	1.1	0.7	0.7	0.7	1.5	1	-999	0.8
2003	1	9	9	0.8	1	1.1	0.9	1.6	0.9	1.6	1.3	-999	0.8
2003	1	10	10	0.8	1.1	1.1	0.8	1.4	1	1.4	1.2	-999	0.9
2003	1	11	11	0.9	1.3	1.3	0.7	1.7	1.2	1.5	1.2	-999	1
2003	1	12	12	0.9	1.3	1.4	0.8	1.7	1.6	1.7	1.1	-999	1
2003	1	13	13	0.7	1.1	1.1	0.8	1.1	0.9	1.5	1.1	-999	0.8
2003	1	14	14	0.7	1.1	1.1	0.7	0.2	0.4	1.2	0.7	-999	0.8
2003	1	15	15	0.8	1.2	1.2	0.8	1.8	1.1	1.2	0.9	-999	0.8
2003	1	16	16	1	1.2	1.3	0.9	2	1.1	1.2	1.2	-999	1.1
2003	1	17	17	0.9	1.2	1.3	0.8	1.6	1.1	1.1	1.2	-999	1.1
2003	1	18	18	0.9	1.2	1.2	0.8	1.5	1	1.3	1.3	-999	0.9
2003	1	19	19	0.8	1.2	1.2	0.9	1.7	1	1.2	1.1	-999	0.8
2003	1	20	20	0.7	0.9	1	0.7	0.3	0.4	1	0.7	-999	0.8
2003	1	21	21	0.6	0.7	0.8	0.6	0.1	0.1	0.8	0.6	-999	0.7
2003	1	22	22	0.6	0.9	0.9	0.6	0.1	0.2	0.9	0.6	-999	0.7
2003	1	23	23	0.6	1	1	0.7	0.1	0.3	0.9	0.5	-999	0.7
2003	1	24	24	1	1.4	1.4	0.9	1.7	1.3	1.5	1.4	-999	1.1
2003	1	25	25	0.9	1.3	1.3	1	1.6	1.1	1.5	1.4	-999	1
2003	1	26	26	1	1.4	1.5	1.1	2.2	1.4	1.5	1.5	-999	1.1
2003	1	27	27	0.7	1	1	0.7	-0.1	0.3	1.1	0.8	-999	0.7
2003	1	28	28	1	1.3	1.3	0.9	1.3	0.8	1.3	1.3	-999	1
2003	1	29	29	1.4	1.5	1.6	0.7	0.3	0.4	0.9	1	-999	1.7
2003	1	30	30	0.9	1.4	1.4	0.8	0.4	0.6	1.3	1.1	-999	1.1
2003	1	31	31	1.3	1.7	1.7	1	1.7	1.3	1.5	1.2	-999	1.5
2003	2	1	32	1.2	1.6	1.6	1	1.6	1.2	1.4	1.6	-999	1.3
2003	2	2	33	1.4	1.7	1.8	1.1	1.8	1.4	1.5	1.2	-999	1.6
2003	2	3	34	1.5	1.7	1.8	0.9	1	1	1.3	1	-999	1.8
2003	2	4	35	1.2	1.5	1.5	0.9	1	0.8	1.1	0.9	-999	1.3
2003	2	5	36	1.2	1.6	1.6	1	1.2	1	1.1	1.3	-999	1.4
2003	2	6	37	1.5	1.8	1.9	1.2	1.9	1.3	1.5	1.2	-999	1.7
2003	2	7	38	1.3	1.7	1.7	1.1	1.6	1.2	1.4	1.3	-999	1.4
2003	2	8	39	1.2	1.7	1.7	1.2	2	1.4	1.3	1.4	-999	1.4
2003	2	9	40	1.2	1.6	1.6	1.1	1.6	1	1.1	1.1	-999	1.3
2003	2	10	41	1	1.3	1.3	1	1.3	0.6	0.9	1.1	-999	1
2003	2	11	42	1.2	1.3	1.4	1.5	1.9	0.5	0.9	1.4	-999	1.2
2003	2	12	43	0.7	0.8	0.9	0.7	0.2	0.1	0.6	0.5	-999	0.7
2003	2	13	44	0.9	1.1	1.2	0.8	0.5	0.2	0.6	0.6	-999	1
2003	2	14	45	1.1	1.4	1.4	1	0.9	0.6	1.1	1.2	-999	1.2
2003	2	15	46	1.3	1.6	1.6	1.1	1.4	0.8	1	1	-999	1.4
2003	2	16	47	1.2	1.6	1.6	1.1	1.5	0.9	1	1.1	-999	1.3
2003	2	17	48	1.3	1.7	1.8	1.3	2.1	1.2	1.1	1.6	-999	1.4
2003	2	18	49	0.9	1.2	1.3	0.7	0.2	0.3	0.7	1	-999	1
2003	2	19	50	0.8	1.2	1.2	0.8	0.2	0.3	0.9	1	-999	0.9
2003	2	20	51	1.3	1.7	1.7	1.2	1.6	0.9	1	1.3	-999	1.4
2003	2	21	52	0.9	1.2	1.2	0.7	0.2	0.2	0.7	0.8	-999	1
2003	2	22	53	1.4	1.7	1.8	1.3	2	0.7	0.6	1.3	-999	1.6
2003	2	23	54	0.9	1.2	1.2	0.8	0.4	0.2	0.6	1	-999	1
2003	2	24	55	0.8	1	1.1	0.9	0.5	0.4	0.9	1.1	-999	0.9
2003	2	25	56	0.9	1	1	1	0.7	0.2	0.8	0.8	-999	0.9
2003	2	26	57	1.4	1.6	1.8	1.6	2	1	1	1.4	-999	1.4
2003	2	27	58	1.4	1.8	1.8	1.4	1.9	0.9	0.9	1.4	-999	1.5
2003	2	28	59	1.7	2.1	2.2	1.7	2.6	1.4	1.2	1.7	-999	1.8
2003	3	1	60	2	2.4	2.6	1.9	3.2	1.8	1.2	1.9	-999	2.2
2003	3	2	61	1.6	1.9	2	1.3	1.6	1.1	1.1	1.3	-999	1.8
2003	3	3	62	1.6	2	2	1.4	1.7	1.2	1.3	1.4	-999	1.8
2003	3	4	63	1.7	2.1	2.2	1.6	2.1	1.5	1.5	1.6	-999	1.8
2003	3	5	64	2	2.3	2.4	1.6	1.9	1.6	1.7	1.8	-999	2.3
2003	3	6	65	2.2	2.5	2.6	1.5	1.9	1.7	1.7	1.8	-999	2.6
2003	3	7	66	2.3	2.8	3	2.2	3.7	2.7	1.8	2.4	-999	2.6
2003	3	8	67	1.9	2.4	2.5	1.7	2.3	2	1.9	2.1	-999	2.1
2003	3	9	68	1.7	2.3	2.3	1.7	2.1	1.8	2	1.8	-999	1.9
2003	3	10	69	1.9	2.5	2.6	2	3	2.2	1.8	2.1	-999	2.1
2003	3	11	70	2	2.4	2.5	2	2.6	1.9	1.9	2.2	-999	2.2
2003	3	12	71	2	2.4	2.5	2.2	2.6	1.8	2	2	-999	2.1
2003	3	13	72	2.7	3.1	3.5	2.6	4	2.8	1.7	2.6	-999	3.1
2003	3	14	73	1.5	1.9	1.9	1.3	1.1	1	1.6	2.1	-999	1.7
2003	3	15	74	2.3	2.8	3	2.5	3.2	2.4	2.2	2.5	-999	2.5
2003	3	16	75	3	3.5	3.9	3	4.3	3.2	2.7	2.5	-999	3.4
2003	3	17	76	2.4	2.8	3	2.3	2.9	2.3	2.3	2.4	-999	2.6
2003	3	18	77	1.8	2.1	2.1	1.5	1.3	1.3	1.8	1.9	-999	2
2003	3	19	78	2.1	2.4	2.7	2.5	2.7	1.8	1.9	2.1	-999	2.3
2003	3	20	79	2	2.4	2.6	2.5	2.8	1.6	1.6	1.8	-999	2.1
2003	3	21	80	1.6	1.8	1.9	1.9	1.8	1	1.2	1.8	-999	1.6
2003	3	22	81	1.5	1.8	1.9	1.7	1.5	1.2	1.5	2.1	-999	1.7
2003	3	23	82	1.6	1.9	2	1.7	1.7	1.2	1.5	1.8	-999	1.7
2003	3	24	83	0.9	1.1	1.1	0.9	0.2	0.4	1.2	1	-999	1
2003	3	25	84	1.2	1.4	1.4	1.1	0.5	0.7	1.6	2	-999	1.4
2003	3	26	85	1.4	1.6	1.7	1.7	1.4	0.8	1.3	1.8	-999	1.5
2003	3	27	86	2.5	2.9	3.2	3.2	3.5	1.7	1.7	2.6	-999	2.6
2003	3	28	87	2.3	2.7	3	2.9	3.3	1.5	1.3	2.3	-999	2.4
2003	3	29	88	2.4	2.8	3.2	3	3.4	1.6	1.6	2.6	-999	2.5
2003	3	30	89	2.4	2.8	3.1	3	3.3	1.7	1.7	2.3	-999	2.5
2003	3	31	90	2.5	2.9	3.2	3.2	3.2	2	2.3	2.8	-999	2.6
2003	4	1	91	2.7	3	3.4	3.5	3.4	2.1	2.6	3.1	1	2.8
2003	4	2	92	2.5	2.9	3.2	3	3.1	2.3	2.9	2.7	1.7	2.7
2003	4	3	93	3.1	3.5	4	3.5	3.9	3.1	3.5	3.5	1.9	3.4
2003	4	4	94	2.9	3.3	3.5	3.4	3.4	2.7	3.9	3.8	2.9	3
2003	4	5	95	3.1	3.5	3.9	3.7	3.6	3	4.3	3.7	2.9	3.3
2003	4	6	96	3.1	3.5	3.8	3.5	3.9	2.9	3.4	3.6	3.4	3.3
2003	4	7	97	2.7	3	3.4	3.1	3.3	2.5	2.8	3.1	2.2	2.8
2003	4	8	98	2.8	3.2	3.4	3	3.4	2.6	3.2	3.4	2.4	3
2003	4	9	99	2.9	3.4	3.7	3.3	3.9	2.7	2.7	2.8	1.4	3.1
2003	4	10	100	3.2	3.7	4	3.7	4.5	3.1	2.8	3.4	2.1	3.3
2003	4	11	101	3.8	4.5	4.8	4.2	5.9	4.4	3.6	3.9	2.5	4.1
2003	4	12	102	3.4	3.8	4	3	3.7	3.6	3.9	3.7	2.6	3.8
2003	4	13	103	3.8	4.4	4.7	4.1	5.3	4.2	4.1	4.3	2.3	4
2003	4	14	104	2.8	3.2	3.4	3.1	3.3	2.7	3.5	3.6	3.2	2.9
2003	4	15	105	2	2.4	2.4	2	1.8	1.6	2.4	2	2.4	2.2
2003	4	16	106	3.2	3.6	4.2	3.9	4.1	2.8	3	3.4	0.9	3.4
2003	4	17	107	3.4	3.9	4.3	4	4.5	3.3	3.4	4.1	2.2	3.6
2003	4	18	108	1.8	2.1	2.1	1.6	1.1	1.4	3	2.1	3.2	2
2003	4	19	109	3.5	4	4.3	3.6	4.3	3.2	3.4	3.6	0.2	3.8
2003	4	20	110	3.1	3.6	3.9	3.6	4.2	2.7	2.8	2.8	2.4	3.3
2003	4	21	111	2.1	2.5	2.6	2.4	2.2	1.7	2.5	2.6	1.7	2.2
2003	4	22	112	3.1	3.6	3.8	3.7	4.1	2.7	3	3.1	1.2	3.2
2003	4	23	113	2.9	3.3	3.6	3.4	3.7	2.4	2.8	3.8	1.7	3
2003	4	24	114	2.5	2.8	2.9	2.7	2.3	2.3	3.8	3.5	2.2	2.7
2003	4	25	115	2.5	2.9	3.1	2.9	2.7	2.5	3.7	3.6	1.1	2.7
2003	4	26	116	2.8	3.3	3.5	3.1	3.5	2.6	2.9	3	2.1	2.9
2003	4	27	117	2.7	3.2	3.3	3	3.3	2.6	2.9	3.3	1.4	2.8
2003	4	28	118	3.6	4.2	4.6	4.3	5.4	3.8	3.2	4.2	2.1	3.7
2003	4	29	119	3.8	4.3	4.8	4.1	5.1	4.1	3.4	4.2	2.6	4
2003	4	30	120	4.6	5.1	5.7	4.6	6	4.8	3.9	4.9	3.5	5.1
2003	5	1	121	4	4.6	5	4.2	5.3	4.6	4.6	4.7	3.1	4.3
2003	5	2	122	4.5	5	5.7	5.3	5.9	4.8	4.9	5	3.9	4.7
2003	5	3	123	4.9	5.5	6.2	5.7	6.6	5.8	6	4.8	4.8	5.1
2003	5	4	124	5	5.6	6.1	5.4	6.6	5.9	6.2	5	4.7	5.3
2003	5	5	125	4.9	5.6	6	5.3	6.5	5.9	7	5.3	4.1	5.2
2003	5	6	126	4.4	5.3	5.5	5	6.2	6	7.1	5	5.3	4.6
2003	5	7	127	4.5	5.3	5.6	5.2	6.6	5.3	5.4	4.4	4	4.7
2003	5	8	128	4.4	4.9	5.6	5.2	5.9	4.9	4.5	5.3	5.9	4.6
2003	5	9	129	4.7	5.3	5.9	5.1	6.2	5.5	5.4	5.4	3.7	5
2003	5	10	130	5	5.6	6	5.6	6.7	5.6	6.1	5.8	4.7	5.2
2003	5	11	131	5.3	5.9	6.4	5.4	6.9	6.5	6.5	5.9	3.5	5.8
2003	5	12	132	5.1	5.8	6.3	5.3	6.5	6.4	7.1	5.7	5.6	5.5
2003	5	13	133	5.1	5.7	6.2	5.4	6.3	5.9	6.9	5.8	4.2	5.5
2003	5	14	134	3.8	4.1	4.5	4	3.7	4.3	7	5.4	5	4
2003	5	15	135	4.5	4.9	5.5	5.4	4.9	4.4	6.8	5.4	2.6	4.6
2003	5	16	136	4.6	5.2	5.8	5.3	5.8	5.3	6.1	5.8	4.9	4.9
2003	5	17	137	4.1	4.7	5.2	4.7	5.1	5.1	6	5.6	4.2	4.2
2003	5	18	138	4.4	4.9	5.4	5.2	5.3	4.8	6.1	5.4	5	4.5
2003	5	19	139	4.9	5.6	6	5.5	6.6	5.9	6.4	5.6	3.6	5.1
2003	5	20	140	4.3	5.2	5.4	4.8	5.9	5.7	6.8	5.8	4.4	4.6
2003	5	21	141	3.6	4.4	4.5	3.6	4.1	4.6	6.5	4.8	3.4	3.9
2003	5	22	142	4.3	5	5.2	4.7	5.7	5.2	5.8	5.1	3.7	4.5
2003	5	23	143	5	5.7	6.2	5.2	6.8	6.1	5.4	5.4	2	5.5
2003	5	24	144	5.1	5.8	6.1	5.9	7	5.4	5.8	6.4	4.2	5.3
2003	5	25	145	4.8	5.6	5.9	5.6	7.1	5.8	5.5	4.9	3.5	5
2003	5	26	146	4.6	5.3	5.6	4.7	6.2	5.5	4.8	5.1	4.4	5
2003	5	27	147	4.8	5.5	5.8	4.9	6.5	5.5	5	5.4	3.4	5.3
2003	5	28	148	4.5	5.1	5.4	4.6	5.8	5.3	5.4	5.2	4.5	4.9
2003	5	29	149	4.2	4.8	5	4.1	5.2	4.9	5.2	5.3	2.9	4.5
2003	5	30	150	3	3.6	3.6	2.9	3	3.3	4.8	4.5	2.9	3.2
2003	5	31	151	3.1	3.8	3.8	3.2	3.6	3.3	4.2	3.2	4.4	3.3
2003	6	1	152	4.2	4.8	5.3	4.8	5.6	4.8	4.7	4.8	2.4	4.4
2003	6	2	153	4.3	4.9	5.3	4.9	5.5	4.5	5.1	5.1	2.1	4.5
2003	6	3	154	4.5	5.1	5.5	5.1	6.2	5.1	4.9	5.3	3.1	4.7
2003	6	4	155	5.2	6.1	6.3	5.7	7.6	6.5	6.1	5.8	2.9	5.5
2003	6	5	156	5.2	6	6.4	5.7	7.2	6.4	6.5	5.2	4.5	5.5
2003	6	6	157	5.8	6.5	7.1	6.2	8.2	7.1	6.3	6.2	4	6.3
2003	6	7	158	6.1	6.7	7.2	5.7	7.8	7.8	7.1	6.3	4.7	6.8
2003	6	8	159	5.9	6.5	7	5.5	7.1	7.5	8	6.4	4.7	6.6
2003	6	9	160	5.8	6.4	6.9	5.7	7.8	7.3	6.5	5.7	4.2	6.3
2003	6	10	161	5.9	6.6	6.9	5.6	8.2	7.6	6.2	6.1	3.7	6.6
2003	6	11	162	4.9	5.6	5.8	4.5	6.3	6.4	5.8	5.5	5.1	5.5
2003	6	12	163	5.1	5.5	5.7	4.2	5.4	5.7	6.1	5.8	3.7	5.8
2003	6	13	164	5.3	6	6.2	5	6.8	6.6	6.7	6.6	3.3	5.9
2003	6	14	165	5.2	6.1	6.3	5.4	7.1	7.1	7.9	6.8	4.3	5.6
2003	6	15	166	5.6	6.5	6.8	6	8	7.7	7.9	6.6	4.8	6
2003	6	16	167	5.9	6.6	6.9	5.9	7.9	7.7	7.7	6.7	6.2	6.4
2003	6	17	168	6.2	6.7	7.1	5.6	7.8	7.6	7.1	6.3	6	6.9
2003	6	18	169	6	6.5	6.9	5.6	7.7	7.3	6.7	6.7	7	6.7
2003	6	19	170	6.8	7.3	7.8	5.8	8.3	8.3	7.2	6.2	5.4	7.8
2003	6	20	171	6.4	6.8	7.3	5.6	7.7	7.7	6.9	6.5	5.9	7.2
2003	6	21	172	6.1	6.7	7.1	5.7	7.9	7.7	7.3	6.2	6.5	6.8
2003	6	22	173	5.9	6.5	6.8	5.5	7.6	7.2	6.9	5.8	6	6.5
2003	6	23	174	5.3	6.2	6.5	5.9	7.7	7.1	7.2	6.3	5.3	5.6
2003	6	24	175	6	6.7	7.1	5.9	8.1	8	7.3	6.6	7.1	6.6
2003	6	25	176	6.2	6.9	7.3	6	8.5	8.5	7.8	6.6	6.5	6.8
2003	6	26	177	7	7.5	7.9	6.1	8.7	9	8.5	6.6	5.8	7.9
2003	6	27	178	6.4	6.9	7.2	5.5	7.7	8.4	8.2	6.8	6.3	7.2
2003	6	28	179	5.8	6.5	6.7	5.6	7.6	7.6	8	6.7	5.6	6.3
2003	6	29	180	6.5	7.1	7.4	5.7	8.3	8.6	8	6.2	6	7.3
2003	6	30	181	6	6.8	7	5.7	8.2	8.2	7.6	6	5.9	6.6
2003	7	1	182	6.6	7.2	7.5	5.9	8.8	8.7	7.4	6.4	5.8	7.4
2003	7	2	183	6.9	7.4	7.7	6	8.8	8.9	8.1	6.8	5.4	7.8
2003	7	3	184	6.9	7.2	7.6	5.8	8.1	8.6	8.4	7.4	6.3	7.8
2003	7	4	185	7.1	7.6	7.9	5.9	8.7	9.6	9.2	7.1	6.2	8.1
2003	7	5	186	6.3	7	7.3	5.9	8.3	9.1	9	7.9	6.4	6.9
2003	7	6	187	6.1	6.8	7.1	5.8	8.1	8.6	8.5	7.4	6.9	6.7
2003	7	7	188	6.5	7	7.2	5.3	8	8.5	7.5	5.8	6.7	7.4
2003	7	8	189	7.1	7.5	7.9	5.5	8.4	8.8	7.4	5.7	6	8.3
2003	7	9	190	5.4	6	6.3	4.9	6.6	6.8	6.8	5.8	6	6
2003	7	10	191	5.5	6.3	6.6	5.7	7.4	7.2	7.5	6.7	5.3	5.9
2003	7	11	192	6.6	7	7.9	6.2	7.9	8.4	8.1	6.6	5.8	7.4
2003	7	12	193	7	7.4	7.9	6	8.5	8.8	8.2	6.6	6.8	7.9
2003	7	13	194	6.3	6.9	7.3	5.8	8	8.4	8.2	7	6.5	7
2003	7	14	195	6.6	7.1	7.5	5.9	8.3	8.2	7.7	6.5	5.5	7.3
2003	7	15	196	7.3	7.5	8.2	5.8	8.2	8.9	7.9	6.6	6	8.4
2003	7	16	197	7.5	7.7	8.3	5.8	8.6	9.4	8.3	6.8	5.3	8.6
2003	7	17	198	7.3	7.5	8.1	5.7	8.4	9.4	8.1	6.5	6.5	8.4
2003	7	18	199	6.5	7	7.5	5.6	8.2	8.8	7.5	6.1	5.8	7.4
2003	7	19	200	5.9	6.7	7	5.6	8	8.3	7.8	6.1	6	6.5
2003	7	20	201	5.3	6.3	6.5	5.5	7.6	8	8.2	6.1	6.5	5.7
2003	7	21	202	5.5	6.4	6.6	5.6	7.7	7.8	8	6.5	6.6	6
2003	7	22	203	5.7	6.6	6.8	5.5	8	8.1	7.7	5.8	6	6.3
2003	7	23	204	5.9	6.5	6.8	5.3	7.4	7.8	7.7	5.9	6.4	6.5
2003	7	24	205	5.3	6.2	6.4	5.6	7.4	7.1	7.8	6	5.3	5.7
2003	7	25	206	5.3	6.3	6.5	5.4	7.6	7.7	7.7	5.5	7	5.8
2003	7	26	207	5.4	6.3	6.5	5.5	7.8	7.6	7.4	5.8	6	5.8
2003	7	27	208	5.3	6.2	6.4	5.5	7.5	7.3	7.7	5.8	5.7	5.6
2003	7	28	209	5.6	6.2	6.5	4.8	6.9	7.6	7.4	5.5	5.8	6.3
2003	7	29	210	5.6	6.5	6.8	5.2	7.9	8.5	7.1	5.4	5.4	6.3
2003	7	30	211	5.2	6.1	6.3	5.3	7.5	7.4	7.2	5.8	6.5	5.5
2003	7	31	212	4.8	6	6.1	5.1	7.6	8	7.6	5.9	6.3	5.1
2003	8	1	213	4.7	5.8	6	5	7	7.6	8	6.5	4.6	5
2003	8	2	214	5.7	6.4	6.7	5.4	7.4	7.9	8.5	6.9	7	6.3
2003	8	3	215	6.6	6.9	7.4	5.5	7.6	8.4	8.5	7.3	5.5	7.4
2003	8	4	216	6.1	6.4	7.6	6.2	6.8	8.1	8.4	6.6	8.4	6.7
2003	8	5	217	5.8	6.4	6.9	5.6	7.4	7.7	8	6.5	5.8	6.4
2003	8	6	218	5.8	6.4	7.2	5.7	7.2	8.3	8.2	6.9	6.9	6.4
2003	8	7	219	6.6	7	7.5	5.5	7.7	8.8	8.9	6.9	5.5	7.5
2003	8	8	220	5.2	6	6.2	5.1	6.8	7	7.7	5.9	5.3	5.6
2003	8	9	221	5.3	5.8	6.5	5.3	6.2	6.9	7.9	6.5	5.2	5.8
2003	8	10	222	5.2	5.9	6.4	5.3	6.6	7.1	7.7	6.3	5.5	5.6
2003	8	11	223	5	5.8	6.1	4.9	6.9	7.1	6.9	5.6	5.2	5.5
2003	8	12	224	4.8	5.7	5.8	4.6	6.8	7.3	6.9	6.7	6.3	5.2
2003	8	13	225	5.2	6.1	6.3	4.8	7.2	8	7.6	5.9	5.4	5.8
2003	8	14	226	5.2	6	6.2	4.9	7.3	7.4	7.3	5.9	6.9	5.7
2003	8	15	227	4.9	5.7	6.1	5.1	6.8	7.1	7.2	6.1	4.4	5.3
2003	8	16	228	5.1	5.8	6.4	5.3	6.6	7.4	7.9	5.9	6.5	5.5
2003	8	17	229	5.7	6.1	6.8	5.5	6.7	7.2	8.1	6.5	6.5	6.3
2003	8	18	230	5.9	6.3	6.9	5.4	6.8	7.7	8.3	6.8	6.8	6.6
2003	8	19	231	5.6	6.1	6.7	5.4	6.5	7.4	8.7	6.5	7.5	6.2
2003	8	20	232	5.1	5.8	6.3	5.5	6.4	6.9	8.3	6.2	7.7	5.4
2003	8	21	233	4.7	5.3	5.8	5	6.1	6.3	7	5.8	5.7	5
2003	8	22	234	4.7	5.5	5.9	5	6.1	6.7	7.6	5.8	6.1	5.1
2003	8	23	235	5	5.5	6.1	4.7	5.9	6.8	7.5	5.5	6.5	5.6
2003	8	24	236	5.1	5.7	6.3	4.9	6.3	7.2	7.4	5.5	6.4	5.6
2003	8	25	237	4.6	5.5	5.8	4.6	6.6	7.2	6.9	5.5	5.6	5
2003	8	26	238	4.5	5.3	5.7	4.6	6.3	6.6	6.7	5.6	5.8	4.9
2003	8	27	239	4.5	5.3	5.6	4.4	6.2	6.6	7	5.5	5.7	4.8
2003	8	28	240	4.3	5.2	5.5	4.5	6.1	6.6	7	5.5	5.7	4.6
2003	8	29	241	4.3	5.1	5.5	4.5	5.8	6.5	7.2	5.8	5.5	4.6
2003	8	30	242	4.4	5.2	5.5	4.5	5.7	6.4	7.5	5.8	5.5	4.8
2003	8	31	243	4.5	5.3	5.7	4.8	6	6.6	7.7	5.7	5	4.8
2003	9	1	244	4.6	5.2	5.7	5	5.6	6.2	7.8	5.7	6.8	4.9
2003	9	2	245	4.4	5	5.5	4.7	5.6	6.2	7.1	6	5.7	4.6
2003	9	3	246	4.5	5.1	5.6	4.6	5.7	6.2	6.9	5.9	5.1	4.9
2003	9	4	247	4.3	4.9	5.4	4.5	5.7	5.9	6.3	5.1	5.7	4.6
2003	9	5	248	4	4.5	5.1	4.3	5.1	5.2	5.6	4.2	5.9	4.3
2003	9	6	249	3.9	4.5	5.1	4.3	5.4	5.1	4.8	3.8	6.7	4.2
2003	9	7	250	4.4	4.8	5.7	4.7	6	5.6	4.6	4.4	4.8	4.8
2003	9	8	251	4.7	5	5.8	4.5	6.1	5.9	4.9	4.4	5.1	5.2
2003	9	9	252	4.7	5.1	5.8	4.5	6.1	5.9	5.2	4.8	5.1	5.2
2003	9	10	253	4.2	4.7	5.3	4.5	5.6	5.6	5.6	4.8	5.3	4.5
2003	9	11	254	4.2	4.8	5.4	4.6	5.6	5.9	6	4.4	3	4.4
2003	9	12	255	3.7	4.3	4.8	4.2	5.2	5.1	5.3	3.7	5.3	3.8
2003	9	13	256	3.3	3.9	4.3	3.6	4.3	4.5	5.2	3.7	4.8	3.5
2003	9	14	257	4.2	4.8	5.3	4	5.8	6	5.2	4.6	4	4.7
2003	9	15	258	3.6	4.4	4.6	4	5.3	5	5.4	4.7	4.1	3.8
2003	9	16	259	3.8	4.4	4.9	4.1	5.3	5.6	5.5	4.6	4.1	4
2003	9	17	260	4	4.4	4.9	3.7	5	5.3	5	3.9	5	4.4
2003	9	18	261	3.4	4.1	4.4	4	5.3	4.7	4.7	3.7	5.2	3.5
2003	9	19	262	3.3	4.2	4.4	3.8	5.4	5.2	4.7	3.9	4.5	3.5
2003	9	20	263	3.4	4.2	4.5	3.7	5.5	5.3	4.7	3.7	4.5	3.6
2003	9	21	264	3.3	4.1	4.3	3.8	5.1	4.9	4.9	3.7	4.6	3.5
2003	9	22	265	3.6	4.5	4.8	4	5.6	5.9	5.7	3.8	4.5	3.8
2003	9	23	266	3.8	4.5	5	3.8	5.2	6.3	6.2	4.2	4.5	4.1
2003	9	24	267	4	4.4	4.8	3.5	4.4	5.7	6.3	4.2	4.6	4.5
2003	9	25	268	3.8	4.3	4.8	3.8	5	5.7	5.7	4.6	5.2	4.1
2003	9	26	269	3.2	4.1	4.4	3.6	5	5.5	5.6	4.7	4	3.4
2003	9	27	270	3.2	4.1	4.3	3.5	5	5.4	5.7	4.5	4.2	3.4
2003	9	28	271	3.1	3.9	4.1	3.4	4.9	4.9	4.9	4.2	4	3.3
2003	9	29	272	3.3	4	4.4	3.5	5.1	5.4	5.2	3.7	4	3.5
2003	9	30	273	2.9	3.7	3.9	2.9	4.4	4.7	4.6	3.6	3.9	3.1
2003	10	1	274	2.8	3.6	3.8	2.8	4.2	4.5	4.3	3.4	0.5	3.1
2003	10	2	275	2.7	3.4	3.6	3	4.1	4	4.3	3.4	-999	2.9
2003	10	3	276	2.1	2.6	2.7	2.5	2.5	2.7	4	3	-999	2.2
2003	10	4	277	2.7	3.2	3.5	3.1	3.8	3.7	4.1	3.4	-999	2.9
2003	10	5	278	2.9	3.4	3.8	3	4.2	4.3	4.2	3.7	-999	3.1
2003	10	6	279	3.2	3.7	4.1	3.3	4.5	4.9	5.2	4.1	-999	3.4
2003	10	7	280	3.2	3.8	4.1	3.4	4.5	4.9	5.7	4.2	-999	3.4
2003	10	8	281	2.6	3.4	3.6	3	4.1	4.4	4.8	3.7	-999	2.8
2003	10	9	282	2.6	3.4	3.5	2.9	4	4.3	4.7	3.7	-999	2.8
2003	10	10	283	3.2	3.7	4	3	4.1	4.8	5.3	3.8	-999	3.6
2003	10	11	284	2.7	3.3	3.6	2.8	4.1	4.3	4.2	3	-999	2.9
2003	10	12	285	2.5	3.1	3.4	2.6	3.9	4.1	3.9	3.1	-999	2.7
2003	10	13	286	2.5	3.2	3.4	2.6	4.2	4.2	3.9	3.2	-999	2.7
2003	10	14	287	2.6	3.2	3.4	2.5	3.7	4.1	4.4	3.4	-999	2.8
2003	10	15	288	2.7	3.1	3.4	2.3	2.8	3.9	5.1	3.1	-999	3.1
2003	10	16	289	2.9	3.1	3.5	2.9	3.2	3.7	5	3.4	-999	3.2
2003	10	17	290	2.7	3	3.3	2.4	3.2	3.6	4.1	2.9	-999	3
2003	10	18	291	2.2	2.7	3	2.4	3.2	3.5	3.9	2.9	-999	2.4
2003	10	19	292	2.5	2.9	3.2	2.5	3.5	3.6	3.9	3	-999	2.7
2003	10	20	293	2.4	2.8	3.1	2.3	3.2	3.6	3.9	2.9	-999	2.7
2003	10	21	294	2.2	2.6	2.8	2.6	3	3.3	4.4	3.1	-999	2.3
2003	10	22	295	2.2	2.9	3	2.5	3.5	4	4.4	3.3	-999	2.3
2003	10	23	296	2.2	2.8	3	2.6	3.2	3.7	4.7	3.3	-999	2.3
2003	10	24	297	1.6	2	2	1.8	1.7	2.1	3.8	2.4	-999	1.7
2003	10	25	298	2	2.5	2.6	2.4	2.7	2.9	4.3	3	-999	2.1
2003	10	26	299	2.3	2.8	3	2.3	3.4	3.7	3.9	2.9	-999	2.5
2003	10	27	300	2.2	2.5	2.8	2.1	2.8	3.2	3.7	2.4	-999	2.4
2003	10	28	301	1.4	1.9	1.9	1.5	1.6	1.9	3.1	2.2	-999	1.5
2003	10	29	302	1.4	1.8	1.9	1.5	2.3	1.7	1.7	1.8	-999	1.5
2003	10	30	303	1.4	1.8	2	1.5	2.6	1.9	1.4	1.9	-999	1.5
2003	10	31	304	0.9	1.2	1.2	0.8	0.2	0.6	1.5	0.7	-999	1
2003	11	1	305	1.6	2	2.1	1.4	2.3	2.1	2	1.8	-999	1.8
2003	11	2	306	1.8	2.2	2.4	1.7	2.7	2.6	2.8	2.4	-999	2
2003	11	3	307	2.3	2.5	2.7	1.9	3	3.1	3.2	2.5	-999	2.6
2003	11	4	308	1.9	2.4	2.6	1.8	3	3.2	3.3	2.1	-999	2.1
2003	11	5	309	1.6	1.9	1.9	2	2.2	2	3.3	2	-999	1.7
2003	11	6	310	1.4	1.8	1.8	1.6	1.7	1.9	3.5	1.9	-999	1.4
2003	11	7	311	2	2.3	2.5	1.8	2.6	3.1	3.7	2.1	-999	2.2
2003	11	8	312	1.2	1.5	1.5	1.1	0.8	1.3	2.8	1.4	-999	1.3
2003	11	9	313	1.6	1.8	1.9	1.2	1.3	1.7	2.4	1.6	-999	1.9
2003	11	10	314	0.9	1.2	1.2	1	0.8	1	2	1.1	-999	1
2003	11	11	315	1	1.2	1.2	1.2	1.2	0.8	1.7	1.2	-999	1.1
2003	11	12	316	1.2	1.4	1.5	1.4	2	1.3	1.7	1.6	-999	1.3
2003	11	13	317	1	1.4	1.4	1.2	1.7	1.4	1.7	1.5	-999	1.1
2003	11	14	318	1.1	1.4	1.5	1.2	2.1	1.3	1.6	1.5	-999	1.1
2003	11	15	319	1.1	1.4	1.5	1.2	2.2	1.6	1.5	1.6	-999	1.2
2003	11	16	320	1	1.4	1.4	1.1	1.9	1.5	1.7	1.6	-999	1
2003	11	17	321	1	1.5	1.6	1.1	2.1	1.8	1.8	1.8	-999	1.1
2003	11	18	322	1	1.5	1.5	1.2	2.1	1.9	2	1.8	-999	1.1
2003	11	19	323	0.9	1.4	1.4	1	1.5	1.5	2	1.5	-999	1
2003	11	20	324	1.1	1.4	1.5	1	2	1.6	1.6	1.5	-999	1.2
2003	11	21	325	1.2	1.4	1.5	1	1.6	1.5	1.9	1.9	-999	1.3
2003	11	22	326	1.1	1.5	1.6	1.1	2	1.9	2.1	1.6	-999	1.3
2003	11	23	327	1.1	1.4	1.5	1	2.1	1.7	1.8	1.6	-999	1.2
2003	11	24	328	0.7	0.9	0.8	0.8	0.4	0.5	1.9	1.2	-999	0.7
2003	11	25	329	0.7	1	1	0.7	0.1	0.4	1.3	0.8	-999	0.7
2003	11	26	330	0.8	1.1	1.1	0.7	0.4	0.5	1.4	1	-999	0.8
2003	11	27	331	0.9	1.2	1.2	1	1.7	1.3	1.9	1.4	-999	1
2003	11	28	332	0.8	1.1	1.1	0.9	1.3	1	1.6	1.2	-999	0.9
2003	11	29	333	1	1.2	1.3	0.9	1.5	1.4	1.8	1.5	-999	1.1
2003	11	30	334	0.9	1.1	1.1	1	1.4	1	1.8	1.3	-999	0.9
2003	12	1	335	0.9	1.1	1.2	0.8	1.3	1	1.4	0.9	-999	1
2003	12	2	336	0.9	1.1	1.2	0.8	1.3	1.1	1.5	1.1	-999	1.1
2003	12	3	337	0.9	1.1	1.1	0.8	1.1	0.9	1.4	1.1	-999	1
2003	12	4	338	0.9	1.1	1.2	0.7	1.1	0.9	1.3	1.1	-999	1
2003	12	5	339	1.2	1.3	1.4	0.8	1.5	1.3	1.6	1.2	-999	1.4
2003	12	6	340	1.1	1.2	1.3	0.9	1.6	1.2	1.7	1.2	-999	1.3
2003	12	7	341	0.8	0.9	1	0.8	1.1	0.8	1.6	1.3	-999	0.9
2003	12	8	342	0.5	0.7	0.6	0.7	0	0.2	1.4	0.6	-999	0.6
2003	12	9	343	0.6	0.7	0.7	0.8	0.6	0.4	1.5	1	-999	0.6
2003	12	10	344	0.8	0.8	0.9	0.9	1.2	0.6	1.7	1.3	-999	0.8
2003	12	11	345	0.7	1	1	0.7	1.1	0.8	1.3	1	-999	0.7
2003	12	12	346	0.8	1.1	1.1	0.7	1.5	1.1	1.3	1.2	-999	0.9
2003	12	13	347	0.8	1	1.1	0.7	1.4	1	1.2	1	-999	0.9
2003	12	14	348	0.9	1.1	1.2	0.7	1.2	1	1.2	0.9	-999	1.1
2003	12	15	349	0.5	0.7	0.7	0.6	-0.1	0.1	1	0.8	-999	0.6
2003	12	16	350	0.6	0.8	0.8	0.6	0	0.2	1.1	0.4	-999	0.6
2003	12	17	351	0.9	1.1	1.1	0.7	0.3	0.6	1.6	1	-999	1
2003	12	18	352	0.8	0.9	1	0.6	0	0.2	1	0.9	-999	0.9
2003	12	19	353	0.7	0.8	0.9	0.6	1.1	0.4	0.9	0.9	-999	0.8
2003	12	20	354	0.6	0.6	0.7	0.7	1	0.1	0.8	0.9	-999	0.6
2003	12	21	355	0.6	0.8	0.9	0.6	1.3	0.5	0.8	0.9	-999	0.7
2003	12	22	356	0.6	0.8	0.8	0.6	0.9	0.3	0.8	0.7	-999	0.7
2003	12	23	357	0.6	0.8	0.8	0.6	0.8	0.4	0.9	0.8	-999	0.6
2003	12	24	358	0.5	0.7	0.7	0.6	0.9	0.2	0.9	0.9	-999	0.6
2003	12	25	359	0.6	0.8	0.9	0.6	1.4	0.7	1.1	1	-999	0.6
2003	12	26	360	0.5	0.7	0.7	0.6	0.1	0.1	1	0.6	-999	0.6
2003	12	27	361	0.5	0.8	0.8	0.6	0.1	0.1	0.8	0.4	-999	0.6
2003	12	28	362	0.6	0.8	0.8	0.6	0.7	0.4	1.1	0.8	-999	0.6
2003	12	29	363	0.7	0.9	0.9	0.7	1	0.6	1.1	1	-999	0.8
2003	12	30	364	0.6	0.8	0.8	0.7	1.2	0.4	1.1	0.9	-999	0.7
2003	12	31	365	0.6	0.8	0.8	0.7	0.9	0.5	1.1	0.8	-999	0.7
2004	1	1	1	0.8	1.2	1.2	0.6	0.7	0.8	1.1	0.8	-999	1
2004	1	2	2	0.8	1.1	1.2	0.6	0.4	0.6	1	0.5	-999	1
2004	1	3	3	0.8	0.9	1	0.7	0.4	0.5	1.2	0.7	-999	0.9
2004	1	4	4	1	1.2	1.3	0.6	0.2	0.4	1.1	0.6	-999	1.2
2004	1	5	5	0.6	0.7	0.7	0.7	0.2	0.2	1.2	0.7	-999	0.6
2004	1	6	6	0.9	1.1	1.1	0.7	0.6	0.6	1.2	0.7	-999	1
2004	1	7	7	0.5	0.7	0.7	0.6	0.1	0.1	0.8	0.7	-999	0.6
2004	1	8	8	0.8	1	1.1	0.6	1.1	0.4	0.5	0.7	-999	1
2004	1	9	9	0.7	0.9	0.9	0.5	0.1	0	0.4	0.3	-999	0.8
2004	1	10	10	0.8	1	1.1	0.6	0.6	0.3	0.5	0.4	-999	1
2004	1	11	11	0.8	1	1	0.6	0.1	0.1	0.7	0.5	-999	0.9
2004	1	12	12	0.9	1.1	1.2	0.7	0.4	0.6	1.1	0.7	-999	1
2004	1	13	13	0.8	1	1.1	0.9	1.5	0.9	1.3	1.1	-999	0.9
2004	1	14	14	0.6	0.9	0.9	0.6	0.2	0.3	0.9	0.7	-999	0.7
2004	1	15	15	0.6	0.9	0.9	0.7	0.6	0.6	1.1	0.8	-999	0.7
2004	1	16	16	0.7	1	1	0.7	0	0.4	1.2	0.8	-999	0.7
2004	1	17	17	0.9	1.4	1.4	0.7	0.8	1	1.4	1.1	-999	1
2004	1	18	18	0.9	1.2	1.3	0.8	1.7	1.2	1.1	1.2	-999	0.9
2004	1	19	19	0.8	0.9	0.9	1	1.2	0.4	1.2	1.4	-999	0.8
2004	1	20	20	0.8	0.9	0.9	1.1	1.3	0.2	1.2	1.2	-999	0.8
2004	1	21	21	0.6	0.6	0.6	0.8	0.4	0.1	1	0.9	-999	0.6
2004	1	22	22	0.7	1	1	0.6	-0.2	0.2	1	0.6	-999	0.8
2004	1	23	23	0.9	1.1	1.2	0.8	1	0.8	1	1	-999	1.1
2004	1	24	24	0.8	1	1	0.9	1.1	0.5	0.8	0.8	-999	0.8
2004	1	25	25	0.6	0.8	0.8	0.7	0.2	0.2	0.8	0.6	-999	0.7
2004	1	26	26	0.7	0.9	0.9	0.7	0.4	0.4	1	0.9	-999	0.7
2004	1	27	27	0.8	1	1	0.7	0.4	0.4	0.9	0.6	-999	0.9
2004	1	28	28	0.8	0.9	0.9	1.1	1.1	0.2	1	1.2	-999	0.8
2004	1	29	29	1.2	1.5	1.6	0.9	1.1	1.1	1.3	0.9	-999	1.4
2004	1	30	30	0.7	0.9	0.8	1	0.9	0.2	1.2	1.1	-999	0.8
2004	1	31	31	1.3	1.5	1.6	0.9	0.8	1	1.3	0.8	-999	1.6
2004	2	1	32	0.6	0.7	0.7	0.7	0	0.1	1.1	0.8	-999	0.6
2004	2	2	33	1.1	1.1	1.2	1.4	1.5	0.4	1.3	1.4	-999	1.1
2004	2	3	34	1	1.1	1.1	1.3	1.4	0.3	1.2	1.4	-999	1
2004	2	4	35	0.5	0.6	0.5	0.7	0	0	1	0.6	-999	0.5
2004	2	5	36	0.6	0.7	0.6	0.8	0.2	0.1	1.2	0.8	-999	0.6
2004	2	6	37	0.9	1	1	1.2	1.2	0.3	1.2	1.3	-999	0.9
2004	2	7	38	1.5	1.7	1.9	1.5	2.3	1.8	1.7	1.8	-999	1.7
2004	2	8	39	1.3	1.5	1.6	1.4	1.8	1.5	1.7	1.7	-999	1.4
2004	2	9	40	1.4	1.7	1.8	1.4	2.1	1.5	1.8	1.7	-999	1.5
2004	2	10	41	1	1.2	1.3	1	0.6	0.8	1.6	1.3	-999	1.2
2004	2	11	42	1.5	1.7	1.8	1.3	1.5	1.6	1.6	1.5	-999	1.8
2004	2	12	43	1.1	1.3	1.3	1.1	1.1	0.7	1.2	1.4	-999	1.1
2004	2	13	44	0.7	0.8	0.7	0.8	0.2	0.2	1.3	0.9	-999	0.7
2004	2	14	45	0.5	0.6	0.6	0.7	0.1	0	0.8	1.4	-999	0.5
2004	2	15	46	0.8	1	1	1.3	1.3	-0.4	0.3	0.8	-999	0.8
2004	2	16	47	0.6	0.8	0.8	0.7	0.3	-0.2	0.2	0.5	-999	0.7
2004	2	17	48	0.8	1	1	1	0.9	0	0.3	0.8	-999	0.9
2004	2	18	49	0.9	1	1.1	0.9	0.7	0.2	0.5	0.7	-999	0.9
2004	2	19	50	0.8	1.1	1.2	0.7	0.2	0.3	0.8	0.9	-999	0.9
2004	2	20	51	1.1	1.4	1.4	1.3	1.4	0.8	1	1.3	-999	1.2
2004	2	21	52	1	1.2	1.2	1.1	0.8	0.6	1.2	1.6	-999	1.1
2004	2	22	53	1.1	1.4	1.6	1.3	1.7	0.3	0.4	0.9	-999	1.2
2004	2	23	54	1.2	1.4	1.5	1.3	1.4	0.7	0.8	1.4	-999	1.3
2004	2	24	55	0.8	0.9	1	0.7	0.2	0.2	0.7	0.8	-999	0.9
2004	2	25	56	1.3	1.5	1.6	1.5	1.6	0.8	1	1.4	-999	1.4
2004	2	26	57	1.2	1.6	1.5	1.6	1.6	0.9	1.6	1.7	-999	1.3
2004	2	27	58	1.7	1.9	2	2	2.1	1.3	1.9	2.2	-999	1.7
2004	2	28	59	1.2	1.4	1.4	1.5	1.1	0.9	2	1.9	-999	1.3
2004	2	29	60	1.5	1.6	1.7	1.9	1.5	1.1	2.6	2.4	-999	1.5
2004	3	1	60	2.2	2.6	2.8	2.4	3	2.8	3.1	2.7	-999	2.3
2004	3	2	61	1.8	2.1	2.2	2.2	2.1	1.7	3	2.5	-999	1.9
2004	3	3	62	1.5	1.7	1.7	1.8	1.3	1.4	3.1	2.3	-999	1.6
2004	3	4	63	1.5	1.7	1.7	1.8	1.3	1.4	3.2	1.9	-999	1.5
2004	3	5	64	1.8	2.5	2.5	1.7	2.1	2.3	2.9	2.6	-999	2
2004	3	6	65	2	2.4	2.6	2	3	2.2	1.8	1.9	-999	2.1
2004	3	7	66	1.6	1.9	2.1	1.7	2.1	1.4	1.3	1.6	-999	1.7
2004	3	8	67	2.3	2.5	2.9	2.1	3.2	2.2	1.2	1.5	-999	2.5
2004	3	9	68	2.2	2.7	3	2.2	3.5	2.7	1.7	2.5	-999	2.5
2004	3	10	69	2.4	2.7	3.1	2.4	3.4	2.7	1.8	2.5	-999	2.6
2004	3	11	70	2.2	2.5	2.8	2	2.6	2.4	2	2	-999	2.4
2004	3	12	71	1.7	1.9	2	2.2	2	0.9	1.7	2.3	-999	1.7
2004	3	13	72	2	2.2	2.4	2.5	2.5	1.4	2.1	2.4	-999	2.1
2004	3	14	73	2.2	2.5	2.8	2.4	3.2	2.2	1.7	2.6	-999	2.3
2004	3	15	74	2.4	3	3.2	2.6	4	2.6	1.7	2.3	-999	2.6
2004	3	16	75	2.3	2.9	3	2.3	3.7	2.8	1.9	2.6	-999	2.6
2004	3	17	76	2.1	2.5	2.7	2.2	2.9	2.1	1.8	2.6	-999	2.3
2004	3	18	77	1.7	2	2.1	2	1.9	1.3	1.8	2.1	-999	1.8
2004	3	19	78	1.9	2.2	2.3	2.4	2.2	1.6	2.3	2.2	-999	2
2004	3	20	79	2.8	3.2	3.7	3.2	4.1	3.2	2.4	2.9	-999	3.1
2004	3	21	80	3.5	3.7	4.3	3.1	4.5	4.1	2.8	3.4	-999	4
2004	3	22	81	3.3	3.6	4.1	3.3	4.6	3.8	2.9	3.8	-999	3.7
2004	3	23	82	3.2	3.5	4.1	3.6	4.2	3.1	3.2	3.8	-999	3.5
2004	3	24	83	3.5	3.7	4.2	3.3	4	4.3	3.9	3.6	-999	3.9
2004	3	25	84	3.4	3.8	4.3	3.3	4.6	4.2	3.2	3.5	-999	3.8
2004	3	26	85	2.5	3	3.2	2.4	3	2.8	2.7	3.2	-999	2.8
2004	3	27	86	2.7	3	3.3	2.9	3.1	2.9	3.3	3.8	-999	2.9
2004	3	28	87	3.1	3.6	4	3.1	3.9	4	4	3.6	-999	3.4
2004	3	29	88	2.5	3	3.2	2.2	2.4	3.1	3.8	2.9	-999	2.8
2004	3	30	89	3.2	3.5	4	3.2	3.8	3.7	3.5	3.5	-999	3.6
2004	3	31	90	2.6	3.2	3.5	3.8	3.6	2	2.7	3.5	-999	2.6
2004	4	1	91	3	3.3	3.8	3.3	3.8	3.1	2.8	3.5	2.8	3.3
2004	4	2	92	3.1	3.6	3.9	2.9	3.9	3.3	2.7	2.5	2	3.5
2004	4	3	93	3	3.4	3.8	3	3.8	3.3	2.8	2.9	3.4	3.3
2004	4	4	94	2.8	3.3	3.8	3.3	4.3	2.8	1.8	2.2	2.7	3
2004	4	5	95	2.7	3	3.3	2.9	3.7	2.2	1.6	2.3	3.8	2.9
2004	4	6	96	3	3.3	3.8	3.4	3.9	2.9	2.3	3.3	2.2	3.3
2004	4	7	97	3.3	3.7	4.2	3.9	4.3	3.5	3.1	3.8	4.6	3.6
2004	4	8	98	3.1	3.4	3.8	3.9	3.7	2.6	3.3	4.1	4.2	3.2
2004	4	9	99	3.4	3.7	4.2	4.2	4.1	3.1	3.6	4.5	4.1	3.6
2004	4	10	100	3.8	4.5	5	4.3	5.4	5.2	4.7	4.5	3.6	4.1
2004	4	11	101	4.1	4.4	5.1	4.6	4.9	4.2	4.9	4.9	5.6	4.3
2004	4	12	102	4.1	4.5	5.2	4.8	5	4.9	5.5	4.7	3.9	4.3
2004	4	13	103	4.3	4.8	5.2	4.1	5.3	5.4	5.4	5.2	4.5	4.8
2004	4	14	104	3.8	4.1	4.7	4	4.6	4.9	4.7	5	4.9	4.1
2004	4	15	105	3.6	4.2	4.7	3.9	5.3	4.5	3.5	3.7	6.1	3.9
2004	4	16	106	3.4	3.9	4.6	3.8	4.6	3.9	2.7	2.9	4.8	3.8
2004	4	17	107	3.2	3.5	3.9	3.9	3.9	2.7	2.9	4.1	5.3	3.3
2004	4	18	108	2.5	2.8	3	2.7	2.6	2.5	2.8	3.4	2.8	2.7
2004	4	19	109	3	3.2	3.5	3.9	3.2	2	3.3	4	3	3
2004	4	20	110	3.2	3.6	4.1	3.6	4	3.5	3.4	3.6	3.3	3.3
2004	4	21	111	1.9	2.1	2.2	1.9	1.4	1.8	3	3.2	2.8	2.1
2004	4	22	112	2.7	3.1	3.4	3.2	3.2	2.6	2.7	3.1	0.7	2.9
2004	4	23	113	2.8	3.6	3.6	3	4.1	3.4	2.6	2.8	2.3	2.9
2004	4	24	114	3.5	3.9	4.2	2.8	3.7	3.9	3	3.3	1.6	4
2004	4	25	115	3.5	3.9	4.3	3.4	4.4	3.8	3.1	3.9	2	3.8
2004	4	26	116	3.6	4	4.5	4.4	4.4	3.4	4	4.5	2.6	3.7
2004	4	27	117	4.3	4.6	5.3	4.4	4.9	5.4	5.3	4.8	5.4	4.7
2004	4	28	118	4	4.5	5.2	4.7	5.4	4.5	4	4.4	4.9	4.3
2004	4	29	119	3.1	3.5	3.8	3.2	3.3	3.8	4.6	4.5	4.8	3.3
2004	4	30	120	3.5	4	4.5	3.9	4.5	4.2	4.1	4	2.7	3.7
2004	5	1	121	3.9	4.5	5	4.4	5.3	4.9	4.1	4.6	3.7	4.1
2004	5	2	122	2.5	2.8	3	2.2	1.9	2.6	3.8	3.8	3.6	2.8
2004	5	3	123	2.6	2.9	3.1	2.3	2.2	2.6	3.3	2.7	0.1	2.9
2004	5	4	124	3.8	4.2	4.7	3.5	4.2	4	3.6	3.7	1.3	4.3
2004	5	5	125	4.3	4.7	5.5	4.5	5.3	5.2	4.4	5.1	1.6	4.7
2004	5	6	126	3.7	4.1	4.6	3.6	4.1	4.5	4.7	4.9	3.6	4.1
2004	5	7	127	4.6	5.2	6	5.1	6.2	6	5.5	4.9	2.6	4.9
2004	5	8	128	3.9	4.4	4.9	4.6	4.8	3.7	4.5	4.8	5.7	4.1
2004	5	9	129	4.2	4.6	5.3	5.1	5	4	4.6	5	4.6	4.4
2004	5	10	130	4.4	4.7	5.3	5.2	4.9	4.4	5.9	6.2	5.2	4.5
2004	5	11	131	4.1	4.5	5.1	5.2	4.7	3.7	4.7	4.2	5.3	4.2
2004	5	12	132	3.8	4.3	4.9	4.4	4.5	3.7	4.4	4.2	6.6	4.1
2004	5	13	133	4.4	4.9	5.6	4.9	5.7	5.1	4.4	5	4.3	4.7
2004	5	14	134	4.2	5.1	5.4	4.6	6.4	6.1	4.7	5.3	4.7	4.5
2004	5	15	135	3	3.5	3.8	3.1	3.3	3.7	3.8	3.3	6.3	3.2
2004	5	16	136	3.6	4	4.4	4.5	4.1	3.1	3.9	4.8	4.2	3.7
2004	5	17	137	3.8	4.2	4.8	3.7	4.3	4.3	3.6	4.1	3.6	4.2
2004	5	18	138	4.1	4.5	5.2	4.6	5.1	4.4	3.8	4.6	6.3	4.4
2004	5	19	139	4.3	4.7	5.5	4.6	5.3	4.7	3.9	4.6	4.1	4.7
2004	5	20	140	4.3	4.8	5.6	4.6	5.7	5	3.9	4.6	4.8	4.7
2004	5	21	141	5	5.5	6.6	5.4	6.6	6.8	4.9	4.9	3.6	5.4
2004	5	22	142	4.7	5.5	5.7	4.9	6.6	6	5.4	5.3	4.3	5.1
2004	5	23	143	5.3	5.7	6.8	5.3	6.7	7.2	5.5	5.8	5	5.9
2004	5	24	144	5.4	6	6.6	5.2	7.3	7.2	5.6	6	4.7	5.9
2004	5	25	145	5	5.6	6.1	5.4	6.9	6.4	5.9	6.4	5	5.3
2004	5	26	146	5.1	5.6	6.2	5.5	6.2	6	6.8	6.3	4.7	5.4
2004	5	27	147	5.2	5.6	6.6	5.4	6.4	5.9	5.5	5.8	6.2	5.8
2004	5	28	148	4.9	5.2	6	4.5	5.3	5.6	5.4	5.4	5	5.6
2004	5	29	149	5.2	5.6	6.7	5.2	6.3	6.7	5.5	5.3	5.6	5.8
2004	5	30	150	5.2	5.7	6.3	5.2	6.6	6.2	5.7	6	5.5	5.7
2004	5	31	151	5	5.5	6.4	5.5	6.3	6.1	5.7	5.2	5.9	5.3
2004	6	1	152	4.6	5	5.9	4.7	5.5	6	4.8	5.1	5.7	5.1
2004	6	2	153	4.6	5.2	5.8	4.8	6	5.8	5	5.4	5	5
2004	6	3	154	4.7	5.3	5.8	5.3	6	4.9	5.4	5.6	5.4	5
2004	6	4	155	5.3	5.9	6.5	5	7.1	7.5	5.8	6.2	5.1	5.9
2004	6	5	156	6.5	6.6	7.6	5.4	7.3	8	6.6	6.6	4.6	7.5
2004	6	6	157	5.3	5.9	6.4	5.8	6.5	6.1	7.6	6.6	6.4	5.6
2004	6	7	158	5.1	5.7	6.5	6.2	6.1	6.2	7.2	6.2	7.2	5.3
2004	6	8	159	5	5.5	6.4	6.1	6.2	5.7	6.1	5.4	8.4	5.1
2004	6	9	160	4.6	5.3	5.9	5.3	6.2	5.9	5.5	5.6	7.3	4.8
2004	6	10	161	4.8	5.3	6	5.4	5.9	5.4	5.9	5.7	6.5	5.1
2004	6	11	162	5.7	6.1	7.3	6	6.8	6.7	6.4	5.5	5.7	6.2
2004	6	12	163	6	6.3	7.5	5.8	7.2	7.6	6.4	6.5	6	6.7
2004	6	13	164	5.8	6.2	7.4	5.8	6.9	8.3	7.5	6.5	6.6	6.3
2004	6	14	165	5.5	6.3	7.1	5.8	7.3	8.5	8.1	6.4	5.9	5.9
2004	6	15	166	5.5	6.2	6.6	5.6	7.4	7.4	7.3	7.1	6.3	6
2004	6	16	167	5.5	6.1	6.8	5.2	7.1	8	6.8	5.6	6.1	6
2004	6	17	168	6.6	6.9	7.6	5.4	7.7	8.5	7	6.5	5.8	7.6
2004	6	18	169	7.8	7.6	8.6	5.5	8.1	9.7	7.7	6.8	4.7	9.2
2004	6	19	170	6.1	6.5	7.1	5.1	6.8	8.1	8.1	6.6	5.5	7
2004	6	20	171	6	6.6	7	5.4	7.7	7.9	6.8	5.7	6.3	6.7
2004	6	21	172	5.3	6.2	6.4	4.9	7.3	8.2	7	6.3	5.9	5.8
2004	6	22	173	5.4	6.3	6.7	5.3	7.6	8.5	7.5	6.5	5.4	5.9
2004	6	23	174	5.5	6.4	6.4	4.9	7.6	8.2	7.2	6.3	5.9	6.2
2004	6	24	175	5	5.9	6.1	5.1	7.2	7.2	6.4	6	5.5	5.4
2004	6	25	176	5.2	6	6.2	5	7.4	7.3	6.1	5.9	5.4	5.7
2004	6	26	177	5.7	6.2	6.6	4.7	7	8.1	6.8	6.4	5.3	6.5
2004	6	27	178	6.7	7.1	7.4	5.1	8	9.3	7.7	6.6	4.3	7.8
2004	6	28	179	7.2	7.4	7.8	5.1	7.9	9.3	7.5	6.5	5.9	8.5
2004	6	29	180	5.9	6.5	7	5.6	7.6	8	7.1	6.5	5.6	6.5
2004	6	30	181	6.3	6.7	7.4	5.4	7.8	8.9	7.3	7.1	5.9	7.1
2004	7	1	182	5.9	6.5	7.1	5.7	7.4	8	8.1	6.5	7.2	6.5
2004	7	2	183	5.4	6.2	6.7	5.8	7.3	7.6	8.2	6.2	6.4	5.7
2004	7	3	184	6.3	6.8	7.5	5.5	7.6	9.1	8.2	6.5	6.8	7.1
2004	7	4	185	6.5	6.7	7.8	5.7	7.3	9	8	7.2	6.7	7.3
2004	7	5	186	5.8	6.5	7.1	5.4	7.2	9	8.7	7.9	6.6	6.5
2004	7	6	187	5.4	6.2	6.8	6.1	6.6	7.6	10	7.1	8.3	5.7
2004	7	7	188	5.8	6.8	6.8	5	7.7	9.7	10.2	7.6	6.8	6.5
2004	7	8	189	6	6.7	6.7	4.5	6.9	9	9.5	7.6	7.1	6.9
2004	7	9	190	5.1	5.8	5.9	3.9	5.3	7.4	8.8	7	5.4	5.9
2004	7	10	191	5.7	6.6	7.1	5.5	7.7	9.1	8.4	7	5.5	6.3
2004	7	11	192	5.8	6.7	7	5.6	8	8.9	8.3	6.9	6.4	6.4
2004	7	12	193	5.6	6.4	6.9	5.8	7.5	8	8.5	6.9	6.7	6
2004	7	13	194	5.7	6.1	7	6	6.4	7.1	8.4	7	6.4	6.1
2004	7	14	195	6	6.5	7.2	5.8	7.1	7.7	8.5	6.8	5.9	6.6
2004	7	15	196	5.8	6.6	6.8	5.2	8	8.6	7.6	5.7	8.1	6.5
2004	7	16	197	5	6	6.1	5	7.5	7.7	6.7	6.1	6.8	5.4
2004	7	17	198	5	6.1	6.2	4.9	7.5	8	7.4	6.3	5.9	5.5
2004	7	18	199	5.3	6.3	6.3	5	7.8	8.2	7.1	6.2	5.9	5.8
2004	7	19	200	5.4	6.3	6.5	5.2	7.8	8.3	7.5	6.7	5.9	5.9
2004	7	20	201	5.3	6.3	6.4	5.5	7.6	7.4	7.9	6.5	6.1	5.7
2004	7	21	202	5.4	6.2	6.8	5.4	7.5	8.3	7.1	6.4	6.6	6
2004	7	22	203	6.9	7	7.3	4.7	7.5	8.9	7.3	6.6	5.5	8.1
2004	7	23	204	7.7	7.7	8.1	5.1	8.4	10.1	7.7	6.4	5.9	9.2
2004	7	24	205	6.4	6.8	7.5	5.2	7.8	9.2	7.5	6	5.7	7.3
2004	7	25	206	6.8	7	7.4	4.8	7.6	9.2	7.5	6.5	5.6	8
2004	7	26	207	5.7	6.4	6.8	5	7.4	8.5	7.4	6.3	5.4	6.5
2004	7	27	208	6.1	6.5	6.9	4.8	7.3	8.5	7.4	6.4	5.7	7
2004	7	28	209	7	7.2	7.3	4.7	7.9	9.4	7.7	6.8	5.1	8.3
2004	7	29	210	6.2	6.6	7.2	4.9	7.2	9.2	8.2	7.2	5.7	7.2
2004	7	30	211	6.2	6.7	7	5	7.6	9.1	8.5	7.2	6.2	7.1
2004	7	31	212	5.2	6.1	6.4	5	7.2	8.2	8.1	7	6.3	5.8
2004	8	1	213	5.6	6	6.9	5.5	6.8	7.7	7.5	6.6	7	6.1
2004	8	2	214	5.6	6.1	6.9	5.2	7	7.8	6.8	5.7	6.7	6.3
2004	8	3	215	5.5	6	6.7	4.9	6.7	7.9	7.2	6.1	6.6	6.1
2004	8	4	216	5.8	6.2	7.1	5.3	6.9	8	7.4	6.5	6.3	6.5
2004	8	5	217	5.8	6	7	5.5	6.2	7	7.7	6.5	5.6	6.5
2004	8	6	218	5.9	6	7.1	5.7	6.2	7.1	8	6.6	6.7	6.5
2004	8	7	219	5.7	5.9	7	5.5	6.1	7.2	8	6.4	6.2	6.4
2004	8	8	220	5.5	5.8	6.7	5.1	6.2	7.5	7.4	6	6	6.1
2004	8	9	221	5.4	6	6.7	5.1	6.7	7.8	7.7	6	5.9	6
2004	8	10	222	6	6.3	7.1	4.9	6.8	8.3	7.5	5.9	6	6.8
2004	8	11	223	5.2	5.8	6.6	5	6.6	7.5	6.7	5.2	5.8	5.8
2004	8	12	224	4.6	4.9	5.6	5	5.2	5.8	6.5	5.5	7.2	4.9
2004	8	13	225	5.7	6	7.2	5.3	6.6	8	7.1	5.6	6	6.4
2004	8	14	226	5.6	5.7	6.8	5.2	5.9	7.7	7.5	5.4	6.6	6.3
2004	8	15	227	5.3	5.5	6.5	5.6	5.8	6.7	7.4	6.2	6.8	5.8
2004	8	16	228	5.4	5.7	6.7	5.3	6.1	6.8	7.1	5.8	5.7	6
2004	8	17	229	5.1	5.3	6.3	5.3	5.8	6.2	6.4	5.6	7	5.5
2004	8	18	230	4.5	4.9	5.6	5.2	5.2	5.2	6.3	5.2	6.3	4.7
2004	8	19	231	4.7	5	5.6	5.9	4.8	4.2	7.1	5.5	7.1	4.8
2004	8	20	232	4.8	5.3	6.1	5.3	5.7	6.6	6.9	5.3	6	5.2
2004	8	21	233	4.7	5.1	5.9	5	5.3	6.3	7	5.6	6.6	5.1
2004	8	22	234	4.7	5.3	5.9	4.9	5.8	6.3	7.3	5.5	6.2	5.1
2004	8	23	235	4.9	5.3	6	5	5.6	6	7	5.9	6.3	5.3
2004	8	24	236	4.6	5	5.6	5.3	5.1	5.6	7.3	6.4	7.4	4.9
2004	8	25	237	4.7	5	5.7	5	5	5.9	7.4	5.6	6.6	5.1
2004	8	26	238	5	5.2	6	5.4	5.3	5.9	7.3	5.5	7.8	5.3
2004	8	27	239	4.8	5.1	5.8	5.4	5.1	5.6	7.4	5.8	6.8	5.1
2004	8	28	240	4.6	4.9	5.6	5.2	5.2	5.7	6.8	5.6	6.8	4.9
2004	8	29	241	4.5	4.8	5.5	5.2	5.1	5.4	6.5	5.6	6.8	4.7
2004	8	30	242	4.4	4.8	5.5	5	5.3	5.5	6.2	5.5	7.3	4.7
2004	8	31	243	4.7	5.2	5.8	4.6	6.1	6.4	6.3	5.7	5.5	5.2
2004	9	1	244	4.6	5.2	5.8	4.6	5.9	6.6	6.6	5.7	5.1	5.1
2004	9	2	245	4.6	5.1	5.6	4.5	5.6	6.1	6.6	5.5	5.1	5
2004	9	3	246	4.6	4.9	5.6	4.7	5.1	6	7.1	5.9	5.4	5
2004	9	4	247	4.5	4.7	5.4	4.6	4.9	5.8	7.1	5.6	6	4.8
2004	9	5	248	4.3	4.6	5.3	4.7	4.8	5.6	6.5	4.9	6.2	4.6
2004	9	6	249	4	4.3	4.9	4.2	4.4	4.9	5.9	4.6	5.5	4.3
2004	9	7	250	3.8	4.1	4.5	4.6	4.1	3.8	5.9	5	6.5	4
2004	9	8	251	3.8	4	4.4	4.6	3.9	3.7	6.3	5.4	5.9	3.9
2004	9	9	252	4	4.3	4.8	4.7	4.6	4.5	5.6	4.8	5.8	4.1
2004	9	10	253	3.7	4.1	4.5	4.5	4.3	4.1	5.3	3.9	7	3.8
2004	9	11	254	3.4	3.7	4.1	4	4	3.7	4.8	4.4	6.4	3.5
2004	9	12	255	4	4.4	5.2	4	5.3	6	4.4	4.1	5.7	4.5
2004	9	13	256	4.1	4.9	5.2	3.8	6.1	6.3	5.2	4.3	4.2	4.6
2004	9	14	257	4	4.9	5.1	3.6	6.1	6.7	5.5	4.5	5.9	4.5
2004	9	15	258	3.9	5	5.1	3.5	6.4	7.5	6.1	4.8	5	4.4
2004	9	16	259	4.3	5.1	5.3	3.3	6.3	7.6	6	4.8	5	5
2004	9	17	260	4.5	5.2	5.3	3.2	6.5	7.5	5.8	4.7	4.5	5.2
2004	9	18	261	4.8	5.2	5.6	3.4	5.8	7.1	5.9	4.8	4.4	5.6
2004	9	19	262	3.6	4.6	4.8	3.5	5.4	6.6	6.2	4.8	4.2	4
2004	9	20	263	3.7	4.6	5	3.7	5.3	6.7	6.8	4.7	4.8	4.1
2004	9	21	264	3.6	4.5	4.9	3.8	5.3	6.4	6.7	4.4	4.9	3.9
2004	9	22	265	3.6	4.2	4.7	3.8	4.7	5.5	5.8	4.5	5.7	3.9
2004	9	23	266	3.5	3.8	4.3	4.1	4.3	4.3	5.1	4.5	5.2	3.7
2004	9	24	267	3.3	3.9	4.4	3.8	4.5	5.1	5.6	4.6	5.4	3.5
2004	9	25	268	3.5	4	4.5	3.7	4.3	5.5	6.3	4.6	4.3	3.7
2004	9	26	269	3.8	4.2	4.7	3.6	4.5	5.9	5.9	4.7	5.3	4.2
2004	9	27	270	4.1	4.7	5.1	3.3	5.3	6.8	6.1	4.6	3.3	4.7
2004	9	28	271	3.4	4.4	4.6	3.1	5.4	6.8	6.2	4.8	4.5	3.8
2004	9	29	272	3.8	4.4	4.8	3.4	4.9	6.4	6.5	4.8	4.4	4.2
2004	9	30	273	3.7	4.2	4.6	3.4	4.6	5.5	6	4.8	5.1	4.2
2004	10	1	274	3.4	4	4.4	3.4	4.6	5.3	5.6	4.2	4.1	3.7
2004	10	2	275	3.3	4	4.3	3.2	4.7	5.3	5	3.5	5	3.7
2004	10	3	276	2.7	3.3	3.5	2.7	3.6	4	4.6	3.6	4.1	3
2004	10	4	277	2.6	3	3.2	3	3.1	3.5	4.7	3.4	4	2.8
2004	10	5	278	2.9	3.2	3.5	3.4	3.5	3.6	4.8	3.7	4.7	3.1
2004	10	6	279	2.7	3.1	3.4	2.7	3	4.1	5.2	3.2	4.4	3
2004	10	7	280	2.9	3.3	3.7	3	3.8	4.4	4.4	3.3	4.4	3.2
2004	10	8	281	2.3	2.8	3	2.4	3	3.5	4.1	3.2	3.7	2.5
2004	10	9	282	2.4	3	3.2	2.8	3.6	3.5	3.8	2.9	3.3	2.6
2004	10	10	283	2.3	2.8	3	2.8	3.3	3.3	3.7	3.2	3.9	2.4
2004	10	11	284	2.6	3	3.3	2.8	3.4	4	4.3	3.5	3.3	2.7
2004	10	12	285	2.2	2.6	2.7	2.4	2.5	3.2	4.8	2.9	3.9	2.3
2004	10	13	286	2.2	2.5	2.6	2.5	2.4	2.8	4.4	2.9	2.3	2.3
2004	10	14	287	2.6	2.8	3.1	2.7	3.1	3.5	4.2	3.3	4	2.8
2004	10	15	288	2.5	2.9	3.1	2.5	3.1	3.9	4.3	3.3	4.4	2.7
2004	10	16	289	2.5	3.4	3.4	1.9	3.5	4.5	4.6	3.2	3.4	2.8
2004	10	17	290	2.4	3.3	3.4	2.2	3.6	4.8	4.8	3.4	3.8	2.7
2004	10	18	291	2.1	3	3.1	2.2	3.5	4.4	4.7	3.5	2.4	2.2
2004	10	19	292	2.5	2.7	2.9	2.9	2.8	3	4.9	3.5	4.2	2.6
2004	10	20	293	2.7	2.8	3.1	2.6	3.1	3.7	4.2	3.4	3.4	2.9
2004	10	21	294	1.8	2.2	2.2	1.6	1.6	2.7	3.6	2.5	3.8	2
2004	10	22	295	1.7	2.4	2.5	1.7	2.7	3.2	3.1	2.8	5.9	1.8
2004	10	23	296	1.8	2.6	2.7	2	3.2	3.6	3.4	2.7	2.1	2
2004	10	24	297	1.9	2.6	2.8	2	3	3.8	3.7	2.5	2.6	2.1
2004	10	25	298	2	2.7	2.9	2	3.2	4	4.1	2.5	3	2.2
2004	10	26	299	2.1	2.9	3	1.9	3.3	4.4	4.3	2.6	2.9	2.3
2004	10	27	300	1.5	2.4	2.4	1.3	1.2	2.5	4.4	2	3.9	1.7
2004	10	28	301	2.1	2.8	2.9	1.8	2.8	3.8	4.6	2.6	3	2.4
2004	10	29	302	0.9	1	1	1.1	0.5	0.8	3.4	1.8	2.9	1
2004	10	30	303	1.5	2.1	2.1	1.6	2.1	2.9	3.1	2.2	1.1	1.6
2004	10	31	304	1.7	2.4	2.4	1.6	2.8	3.2	3.2	2	1.2	1.8
2004	11	1	305	2	2.7	3	2.2	4.1	4.6	3.6	2	-999	2.1
2004	11	2	306	1.7	2.2	2.3	1.7	2.3	3.1	3.5	2.2	-999	1.9
2004	11	3	307	1.8	2.4	2.5	1.7	2.8	3.3	3.5	2.4	-999	2
2004	11	4	308	1.5	1.8	1.8	1.6	1.6	2.1	3.4	2.2	-999	1.6
2004	11	5	309	1.6	2	2.1	1.6	2.2	2.7	2.9	1.7	-999	1.7
2004	11	6	310	0.9	1.1	1.1	0.8	-0.1	0.5	2.3	1.4	-999	1
2004	11	7	311	0.8	1.1	1.1	0.9	0.4	0.8	2.2	0.7	-999	0.9
2004	11	8	312	1.1	1.2	1.2	1.3	1.1	1	2.6	1.5	-999	1.1
2004	11	9	313	1.4	1.6	1.7	1.1	1.1	1.7	2.4	1.5	-999	1.7
2004	11	10	314	1.4	1.6	1.6	1.2	1.4	1.7	2.3	1.5	-999	1.5
2004	11	11	315	1.5	2	2.1	1.1	1.7	2.5	2.5	1.3	-999	1.8
2004	11	12	316	1.5	1.8	2	1.4	2.2	2.6	2.8	1.7	-999	1.6
2004	11	13	317	1.3	1.7	1.8	1.5	2.1	2.2	2.9	2.1	-999	1.4
2004	11	14	318	1.3	1.7	1.8	1.4	2	2.3	2.7	1.9	-999	1.4
2004	11	15	319	0.9	1.3	1.3	0.9	0.6	1.2	2.3	1.1	-999	1
2004	11	16	320	1.1	1.6	1.6	1.2	1.6	2.2	2.6	1.4	-999	1.2
2004	11	17	321	1	1.3	1.3	0.8	0.2	0.8	1.8	1.3	-999	1.1
2004	11	18	322	1	1.1	1.1	1.1	1.2	1	1.8	1.4	-999	1
2004	11	19	323	1	1.3	1.4	1.1	1.9	1.2	1.7	1.6	-999	1.1
2004	11	20	324	1	1.3	1.3	1	1.3	1	1.8	1.1	-999	1
2004	11	21	325	0.9	1.3	1.3	0.7	-0.1	0.4	1.6	0.8	-999	1
2004	11	22	326	0.9	1.6	1.6	0.7	1.5	1.5	1.2	1.2	-999	1.1
2004	11	23	327	1.2	1.6	1.7	0.6	2	1.7	0.9	1	-999	1.5
2004	11	24	328	1.2	1.4	1.6	0.6	1.9	1.4	0.8	1.2	-999	1.4
2004	11	25	329	0.8	1.4	1.3	0.6	0	0.3	0.7	0.8	-999	1
2004	11	26	330	0.8	1.3	1.3	0.6	0.7	0.7	0.9	0.7	-999	0.9
2004	11	27	331	0.9	1.1	1.2	0.7	1.2	0.5	0.9	1	-999	1
2004	11	28	332	1	1.4	1.5	0.6	1.8	1.4	0.9	1.2	-999	1.2
2004	11	29	333	0.8	1.3	1.3	0.6	1.7	1.4	1	1.1	-999	0.9
2004	11	30	334	0.8	1.4	1.4	0.6	1.6	1.2	1	1.1	-999	0.9
2004	12	1	335	1.1	1.6	1.6	0.6	1.5	1.5	1.2	1.2	-999	1.4
2004	12	2	336	1.5	1.8	1.9	0.6	2.1	2.2	1.6	1.5	-999	1.8
2004	12	3	337	0.8	1.2	1.2	0.7	1.4	1	1.3	1.2	-999	0.9
2004	12	4	338	0.8	1	1	0.8	1.2	0.7	1.4	1.4	-999	0.9
2004	12	5	339	1	1.2	1.3	0.8	1.5	1.3	1.5	1.3	-999	1.2
2004	12	6	340	0.7	0.9	0.9	0.7	0.5	0.3	1.2	0.9	-999	0.8
2004	12	7	341	0.8	1.1	1.2	0.6	1.1	0.9	1.1	1	-999	1
2004	12	8	342	0.9	1.1	1.2	0.7	0.9	0.7	1.1	0.7	-999	1
2004	12	9	343	0.9	1	1.1	0.7	1.3	0.8	1.2	1.1	-999	1
2004	12	10	344	0.8	1.1	1.1	0.7	1.4	0.8	1.2	1.1	-999	0.9
2004	12	11	345	0.7	0.9	1	0.6	1.3	0.5	0.9	0.6	-999	0.8
2004	12	12	346	0.8	1	1.1	0.6	1.5	0.7	1	1	-999	1
2004	12	13	347	0.7	0.9	1	0.6	1.4	0.5	0.9	1.1	-999	0.8
2004	12	14	348	0.7	0.9	0.9	0.6	1.3	0.8	1	1.1	-999	0.8
2004	12	15	349	0.7	0.9	0.9	0.5	0.6	0.2	0.6	0.7	-999	0.8
2004	12	16	350	0.7	1.1	1.2	0.4	1.6	0.8	0.5	0.8	-999	0.9
2004	12	17	351	1	1.2	1.3	0.4	1.4	0.9	0.6	0.9	-999	1.2
2004	12	18	352	1	1.4	1.4	0.4	1.1	0.8	0.6	0.7	-999	1.2
2004	12	19	353	1.2	1.4	1.5	0.5	0.8	0.6	0.6	0.8	-999	1.5
2004	12	20	354	1.2	1.6	1.6	0.6	0	0.2	0.6	0.5	-999	1.5
2004	12	21	355	0.9	1.3	1.4	0.5	1.2	1	0.9	1	-999	1.1
2004	12	22	356	0.8	1.3	1.4	0.5	1.5	1.4	1.1	1.1	-999	1
2004	12	23	357	0.9	1.4	1.4	0.6	0.2	0.5	1	0.5	-999	1
2004	12	24	358	0.9	1.4	1.4	0.6	0	0.4	1	0.5	-999	1
2004	12	25	359	1	1.5	1.6	0.6	0.3	0.6	1	0.5	-999	1.2
2004	12	26	360	1	1.5	1.6	0.4	2	2.1	1.4	1.2	-999	1.2
2004	12	27	361	1.1	1.5	1.6	0.5	1.8	2	1.5	1.3	-999	1.3
2004	12	28	362	0.9	1.5	1.6	0.5	1.9	2.2	1.6	1.4	-999	1.1
2004	12	29	363	1.6	2	2.1	0.5	1.5	2	1.6	1	-999	2
2004	12	30	364	1.3	1.7	1.8	0.5	1.8	2	1.5	1.2	-999	1.6
2004	12	31	365	-999	-999	-999	0.4	-999	-999	1.8	1.3	-999	-999
2005	1	1	1	0.7	1.2	1.2	0.7	1.1	1.3	1.6	1.1	-999	0.8
2005	1	2	2	0.8	1.1	1.2	0.7	1.1	1.3	1.5	1.2	-999	0.9
2005	1	3	3	0.9	1	1.1	0.8	1.4	1	1.3	1.2	-999	1
2005	1	4	4	0.7	1	1	0.6	0.1	0.3	1	0.6	-999	0.8
2005	1	5	5	0.5	0.6	0.6	0.6	0.1	0.1	1	0.6	-999	0.5
2005	1	6	6	1	1.1	1.2	0.7	1.6	1	1.1	1.1	-999	1.1
2005	1	7	7	0.7	0.9	0.9	0.7	1.3	0.6	1	1.1	-999	0.7
2005	1	8	8	0.9	1.1	1.2	0.7	1.6	1.1	1.1	1	-999	1
2005	1	9	9	0.9	1.1	1.2	0.8	1.6	1.2	1.3	1	-999	1
2005	1	10	10	1.1	1.3	1.4	0.8	1.8	1.5	1.3	1.3	-999	1.3
2005	1	11	11	1.1	1.3	1.4	0.8	1.7	1.4	1.3	1.2	-999	1.3
2005	1	12	12	1	1.2	1.3	0.8	1.8	1.5	1.4	1.4	-999	1.1
2005	1	13	13	0.9	1	1.1	0.9	1.5	1	1.5	1.4	-999	0.9
2005	1	14	14	1	1.2	1.3	0.9	1.7	1.5	1.4	1.1	-999	1.1
2005	1	15	15	1.1	1.2	1.3	0.7	0.7	0.9	1.2	0.8	-999	1.3
2005	1	16	16	1.2	1.4	1.5	0.8	1.1	1.4	1.3	0.9	-999	1.5
2005	1	17	17	1.4	1.6	1.8	0.7	1.5	1.5	1.3	1	-999	1.7
2005	1	18	18	1	1.3	1.4	0.7	0.7	0.8	1.1	0.9	-999	1.2
2005	1	19	19	0.7	0.8	0.8	0.9	1	0.2	1	1.3	-999	0.7
2005	1	20	20	0.6	0.6	0.6	0.8	0.3	0.1	1.1	0.9	-999	0.6
2005	1	21	21	0.4	0.5	0.5	0.6	-0.1	0	1	0.7	-999	0.4
2005	1	22	22	1.2	1.3	1.4	0.7	0.2	0.5	1	0.7	-999	1.4
2005	1	23	23	0.8	1	1	0.6	-0.1	0.2	0.9	0.8	-999	0.9
2005	1	24	24	1.2	1.3	1.5	1	1.8	1.1	0.9	1	-999	1.4
2005	1	25	25	0.9	1	1.1	0.9	1.1	0.5	0.8	1.1	-999	1
2005	1	26	26	0.9	1.1	1.2	0.9	1.3	0.7	1	1	-999	1
2005	1	27	27	0.9	1.1	1.1	0.9	1	0.8	1.1	1	-999	1
2005	1	28	28	0.8	0.8	0.8	1	0.8	0.2	1.2	1.2	-999	0.8
2005	1	29	29	1.1	1.5	1.5	0.9	1.3	1.2	1.4	1.1	-999	1.2
2005	1	30	30	0.5	0.6	0.6	0.7	0.1	0.1	1.2	0.6	-999	0.5
2005	1	31	31	1.1	1.4	1.4	0.8	0.6	0.8	1.3	0.8	-999	1.2
2005	2	1	32	0.8	0.9	0.9	0.9	0.8	0.4	1.1	1	-999	0.8
2005	2	2	33	0.7	0.7	0.7	0.9	0.5	0.1	1	1	-999	0.7
2005	2	3	34	0.6	0.7	0.6	0.8	0.3	0.1	1	1	-999	0.6
2005	2	4	35	0.5	0.6	0.5	0.7	0	0	1	0.4	-999	0.5
2005	2	5	36	0.9	0.9	0.9	1.2	1	0.2	1.1	1.2	-999	0.9
2005	2	6	37	0.8	1	1	1.1	1.1	0.2	1	1.1	-999	0.9
2005	2	7	38	0.9	1.1	1.2	1	1	0.6	0.9	1.1	-999	1
2005	2	8	39	1.1	1.2	1.3	1	1.1	0.6	0.7	1	-999	1.2
2005	2	9	40	1.3	1.6	1.8	1.2	2	0.7	0.6	1.1	-999	1.6
2005	2	10	41	1.1	1.3	1.4	1.2	1.8	0.5	0.6	1.2	-999	1.2
2005	2	11	42	1	1.2	1.2	0.9	1	0.5	0.6	0.8	-999	1.1
2005	2	12	43	0.9	1.1	1.1	0.8	0.7	0.2	0.5	0.8	-999	1
2005	2	13	44	0.7	0.8	0.8	0.9	0.6	0	0.7	1	-999	0.7
2005	2	14	45	0.7	0.8	0.8	1	0.6	0	0.8	1	-999	0.7
2005	2	15	46	1.2	1.3	1.4	1.6	1.6	0.3	1.1	1.5	-999	1.2
2005	2	16	47	1.1	1.3	1.4	1.3	1.3	0.8	1.4	1.4	-999	1.2
2005	2	17	48	1.5	1.8	1.9	1.8	2.2	1.5	1.8	1.8	-999	1.6
2005	2	18	49	1.5	1.7	1.8	1.6	1.7	1.7	2.2	1.8	-999	1.6
2005	2	19	50	1.6	1.9	2.1	1.3	1.5	1.8	2.1	1.4	-999	1.9
2005	2	20	51	1.6	1.8	1.9	1.6	1.8	1.7	1.9	1.8	-999	1.8
2005	2	21	52	1.5	1.7	1.8	1.7	2	1.3	1.6	1.7	-999	1.6
2005	2	22	53	1.2	1.4	1.4	1.3	1.2	0.9	1.5	1.8	-999	1.3
2005	2	23	54	1.7	2	2.1	2	2.3	1.8	1.9	1.8	-999	1.8
2005	2	24	55	1.7	1.9	2.1	2	2.3	1.6	2	1.9	-999	1.7
2005	2	25	56	1.6	1.9	2	2	2.1	1.5	2	2.1	-999	1.7
2005	2	26	57	1.7	1.9	2	2.2	2.1	1.1	2.1	2.1	-999	1.7
2005	2	27	58	1.4	1.6	1.6	1.6	1.3	1.1	2.2	1.7	-999	1.4
2005	2	28	59	1.3	1.5	1.5	1.5	1.2	0.9	2	1.9	-999	1.4
2005	3	1	60	1.5	1.7	1.8	2	1.8	1.2	2.2	2.2	-999	1.5
2005	3	2	61	1.7	2	2.1	1.8	1.9	1.8	2.3	1.9	-999	1.8
2005	3	3	62	1.3	1.5	1.5	1.4	1	1.1	2.5	1.6	-999	1.4
2005	3	4	63	1.8	2	2.2	2.1	2.2	1.5	2.1	2.1	-999	1.9
2005	3	5	64	2	2.3	2.5	2.5	2.6	1.7	2.2	2.5	-999	2.1
2005	3	6	65	1.2	1.8	1.7	1.1	0.5	1	1.9	1.2	-999	1.3
2005	3	7	66	2	2.4	2.5	1.7	2.2	2	2	1.8	-999	2.3
2005	3	8	67	1.1	1.4	1.5	1	0.3	0.8	1.9	1.5	-999	1.2
2005	3	9	68	2.7	3	3.6	2.3	3.4	3.2	2.1	1.9	-999	3.2
2005	3	10	69	2.3	2.6	2.9	1.8	2.5	2.3	1.6	1.7	-999	2.7
2005	3	11	70	2	2.3	2.6	2	2.7	2	1.5	1.8	-999	2.2
2005	3	12	71	1.8	2.2	2.4	1.6	2	1.7	1.4	1.6	-999	2.1
2005	3	13	72	1.5	1.7	1.7	2	1.7	0.6	1.3	2	-999	1.5
2005	3	14	73	2.1	2.3	2.6	2.7	2.7	1.3	1.8	2.5	-999	2.2
2005	3	15	74	2.3	2.7	3	2.6	3.4	2.6	2	2.5	-999	2.4
2005	3	16	75	2.7	3.2	3.5	2.7	4.2	3.2	2.4	2.6	-999	3
2005	3	17	76	2.9	3.4	3.6	2.5	4.3	3.5	2.1	2.7	-999	3.2
2005	3	18	77	2.7	3.2	3.5	2.9	4	3.1	2.5	2.8	-999	2.9
2005	3	19	78	2.5	2.8	3.1	2.8	3.2	2.4	2.4	2.7	-999	2.7
2005	3	20	79	1.9	2.2	2.3	2.4	2.2	1.6	2.3	2.4	-999	2
2005	3	21	80	2.4	2.7	2.9	2.4	2.7	2.6	2.4	2.6	-999	2.6
2005	3	22	81	1.3	1.6	1.6	0.9	0.1	0.7	1.7	1.4	-999	1.5
2005	3	23	82	2.5	2.9	3.2	2.5	3.2	2.4	1.8	2.3	-999	2.8
2005	3	24	83	2.4	2.8	3.3	2.9	3.5	1.8	1.5	2.6	-999	2.6
2005	3	25	84	2.6	2.9	3.3	2.9	3.6	2.6	1.8	2.8	-999	2.8
2005	3	26	85	2.8	3.2	3.6	3	4	3.1	2.2	2.8	-999	3
2005	3	27	86	2.9	3.5	3.7	3	4.3	3.5	2.8	3.2	-999	3.1
2005	3	28	87	2.6	2.9	3.3	3	3.3	2.6	2.7	3.1	-999	2.8
2005	3	29	88	2.9	3.3	3.7	2.9	3.6	3.5	3.1	3.4	-999	3.2
2005	3	30	89	3.3	3.8	4.2	3.2	4.4	4.3	3.3	3.5	-999	3.6
2005	3	31	90	2.6	2.9	3.2	2.6	2.8	2.8	3.3	3.9	-999	2.9
2005	4	1	91	2.2	2.7	2.8	3.2	2.7	1.8	3.1	2.7	2.2	2.3
2005	4	2	92	1.7	1.9	2	1.6	1.2	1.5	2.1	1.9	2.8	1.9
2005	4	3	93	2.1	2.4	2.5	1.7	1.7	1.6	1.6	1.7	1.4	2.4
2005	4	4	94	2.4	2.8	3.1	2.4	2.9	2.2	1.7	2.3	1.6	2.7
2005	4	5	95	2.4	2.9	3.2	2.7	3.2	2.4	2.1	2.7	1.6	2.6
2005	4	6	96	2.4	2.8	3	2.6	2.9	2.2	2.3	2.5	1.6	2.5
2005	4	7	97	3.1	3.5	3.9	3.7	4.1	3.1	2.8	3.5	1.7	3.3
2005	4	8	98	3	3.4	3.8	3.5	3.7	3.3	3.3	3	2.8	3.2
2005	4	9	99	2.6	2.9	3.1	3.2	2.8	2.3	3.9	3.1	5.3	2.7
2005	4	10	100	3.3	3.6	4	4	3.9	3.1	3.9	4.3	3.5	3.5
2005	4	11	101	4	4.6	5.2	4.3	5.4	5.3	4.7	4.3	3.6	4.3
2005	4	12	102	3.5	3.9	4.4	4.2	4.2	3.7	4.8	4.4	4.3	3.7
2005	4	13	103	3.3	3.7	4.1	3.6	3.6	3.8	5	3.8	3.9	3.5
2005	4	14	104	3.7	4.3	4.7	3.8	5	4.5	4	3.8	5.8	4.1
2005	4	15	105	3.6	3.9	4.7	3.5	4.4	4.2	2.8	3.1	3.6	4.1
2005	4	16	106	4	4.3	4.9	3.4	4.7	4.3	3	3.6	3.3	4.6
2005	4	17	107	3.4	3.6	4.2	3.6	4	3.7	3.1	4	3.8	3.7
2005	4	18	108	2.5	2.8	3	3	2.6	2.3	3.6	3.6	3	2.6
2005	4	19	109	3.8	4.2	4.8	4.2	4.7	4.3	3.8	3.6	3.5	4.1
2005	4	20	110	3.1	3.5	3.9	4.3	3.7	2.3	3.4	3.9	4.6	3.1
2005	4	21	111	3.4	3.7	4.2	3.7	4.1	3.7	3.6	4.4	2.6	3.6
2005	4	22	112	1.8	2.1	2.2	1.9	1.3	2	4	2.6	3.7	1.9
2005	4	23	113	2.3	2.6	2.7	2.7	2.2	2.6	4.5	3.8	2.5	2.4
2005	4	24	114	3.1	3.8	3.8	2.7	3.3	3.7	3.9	2.9	2.2	3.5
2005	4	25	115	3.8	4.6	4.9	3.9	5.6	5.2	3.9	4.2	1.4	4.1
2005	4	26	116	4.3	4.8	5.3	4.2	5.6	5.1	4.1	4.3	3.5	4.7
2005	4	27	117	3.6	3.9	4.5	4.2	4.2	3.4	4.1	4.6	4	3.8
2005	4	28	118	3.9	4.3	5	4.2	4.8	4.7	3.8	4.3	4.3	4.3
2005	4	29	119	3.9	4.4	5.1	4.5	5	4.4	4.2	4.3	3.8	4.2
2005	4	30	120	3.8	4.2	4.9	4.1	4.8	4.5	3.7	4	3.7	4.1
2005	5	1	121	3.5	3.9	4.5	3.7	4.3	3.9	3.3	3.8	3.7	3.7
2005	5	2	122	3.7	4.1	4.7	3.8	4.6	4.2	3.3	4.2	3.4	4
2005	5	3	123	4.1	4.4	5.2	4	5	4.4	3.3	4.1	3	4.6
2005	5	4	124	2.6	3	3.3	2.7	2.8	2.5	2.2	2.9	3.2	3
2005	5	5	125	4.1	4.5	5.2	4.2	5.1	4.3	3.4	4.4	1.2	4.5
2005	5	6	126	4.2	4.5	5.3	4.3	5.1	4.7	3.7	4.9	4.2	4.6
2005	5	7	127	4.2	4.6	5.2	4.3	5.2	5	4.3	5.8	3.1	4.6
2005	5	8	128	3.5	3.9	4.2	3.3	3.6	4.2	5	5	4.2	3.9
2005	5	9	129	4.1	4.6	5.2	4.6	5.1	3.8	4.1	4.6	3.6	4.4
2005	5	10	130	3.9	4.3	4.8	4.8	4.5	3.6	4.6	5.4	4.7	4
2005	5	11	131	3.5	3.8	4.2	4.2	3.7	3.5	5.5	5.5	4.1	3.6
2005	5	12	132	2.8	3	3.1	3.3	2.5	2.6	5.6	5.6	4.7	2.9
2005	5	13	133	3.7	4	4.5	4.2	3.9	3.7	5.7	4.9	4.3	3.9
2005	5	14	134	4.9	5.3	6.2	4.9	5.8	5.8	5.3	5	3.6	5.4
2005	5	15	135	5.1	5.6	6.2	4.7	6.7	6.9	5.2	5.3	4.6	5.7
2005	5	16	136	4.2	4.6	5.3	4.3	4.9	5.4	5.4	5.8	5.8	4.6
2005	5	17	137	4.3	4.6	5.1	5.2	4.6	4	5.9	5.7	5.9	4.4
2005	5	18	138	4.2	4.8	5.4	4.7	5.2	5.7	6.3	5.6	5.8	4.4
2005	5	19	139	5	5.4	6.2	5.7	5.8	6	6.9	6	6	5.2
2005	5	20	140	4.9	5.3	6.1	5.5	5.8	5.9	6.8	6.3	6.6	5.1
2005	5	21	141	4.8	5.4	6	5.3	5.9	6.4	7.4	6.4	5.2	5.1
2005	5	22	142	4.7	5.2	6	4.8	5.5	6.7	6.9	6.4	5.2	5.2
2005	5	23	143	4.7	5.4	5.7	4.6	6.3	5.8	5.4	5.3	4.4	5.2
2005	5	24	144	4.4	4.7	5.4	4.1	4.9	5.5	4.7	5.3	3.5	4.9
2005	5	25	145	5.3	5.5	6.1	4.3	5.9	6.2	4.9	5.5	4.1	6.1
2005	5	26	146	4.7	5.2	5.7	4.6	5.9	5.6	5.1	5.6	4.5	5.1
2005	5	27	147	4.2	4.7	5.1	4.5	5	4.8	5.9	6	5.3	4.5
2005	5	28	148	4.6	5.1	5.8	5.2	5.9	5.2	5.3	5.5	5.4	4.8
2005	5	29	149	4.8	5.3	6.2	5.1	6	5.7	5.1	5.3	6.8	5.3
2005	5	30	150	3.9	4.4	5	4.1	4.7	5.1	4.9	4.9	4.2	4.3
2005	5	31	151	4.5	5.1	5.6	4.7	5.9	5.3	4.7	5	3.6	4.8
2005	6	1	152	3	3.4	3.8	3.1	3.1	3.5	4.3	3.6	4.9	3.3
2005	6	2	153	4.3	4.7	5.5	4.6	5.3	5.7	5	5.4	2.6	4.6
2005	6	3	154	4	4.6	5	4.1	4.7	5.3	6	5.9	3.4	4.4
2005	6	4	155	4.3	4.9	5.3	4.9	5.3	4.8	6.2	5.7	3.8	4.6
2005	6	5	156	4.8	5.5	5.9	4.6	6.3	6.9	5.8	5.6	3.6	5.3
2005	6	6	157	5.9	6.4	7.2	5.6	7.6	7.6	6	5.8	4.9	6.5
2005	6	7	158	5.1	5.7	6.2	5.8	6.5	5.7	6.7	6.5	5.3	5.3
2005	6	8	159	5	5.5	6.3	6	5.9	6.1	7.6	6.6	5.6	5.2
2005	6	9	160	5.2	5.7	6.6	6.2	6.1	6.2	7.4	6.6	6.7	5.5
2005	6	10	161	5.4	5.8	6.7	5.6	6.6	6.9	6.6	6.5	6.2	5.8
2005	6	11	162	5.2	5.7	6.7	5.6	6.4	5.9	5.6	5.5	6.3	5.7
2005	6	12	163	5.6	6	7.2	5.9	6.7	6.6	6.2	5.9	6.2	6.2
2005	6	13	164	5.5	6	7	5.6	6.8	7.2	6.5	6.1	6.6	6.1
2005	6	14	165	5.5	5.9	6.9	5.6	6.7	7.7	6.7	6.9	6.3	5.9
2005	6	15	166	5.2	5.9	6.6	5.4	6.9	7.6	6.4	5.6	6.9	5.6
2005	6	16	167	5.6	6.1	6.5	5.2	7	7	6.4	6.6	6.2	6.2
2005	6	17	168	6.1	6.6	7.4	5.5	7.6	8.9	7.8	6.4	5.6	6.8
2005	6	18	169	5.8	6.5	7.1	5.7	7.6	8.4	7.9	6.3	6.1	6.3
2005	6	19	170	6.5	6.9	7.7	5.5	7.9	8.9	7.4	6.3	6.3	7.4
2005	6	20	171	5.9	6.2	6.8	4.7	6.4	7.3	6.6	5.9	6.3	6.8
2005	6	21	172	5.4	5.8	6	4.2	5.6	6.5	6.6	5.4	4.4	6.2
2005	6	22	173	6.9	7.2	7.6	4.9	8	8.9	5.9	5.8	4.2	8.2
2005	6	23	174	6.2	6.7	7.3	5.3	7.9	8.9	6.8	6	4.8	7.1
2005	6	24	175	5	6.1	6.1	5.1	7.7	7.9	7.1	6.8	5.9	5.4
2005	6	25	176	6.1	6.7	7.1	5.4	7.8	8.6	7.7	6.5	5.4	6.9
2005	6	26	177	7	7.3	7.6	5.1	8	8.8	6.9	6.1	7.2	8.2
2005	6	27	178	6.3	6.8	7.3	5.3	8	9.2	7.3	6.5	5.7	7.1
2005	6	28	179	5.8	6.7	6.9	5.1	7.8	8.9	7.9	6.3	5.8	6.6
2005	6	29	180	5.3	6.2	6.4	5.2	7.6	8.1	7	6.6	6.3	5.8
2005	6	30	181	6	6.5	7	5.3	7.2	7.9	7.2	6.4	5.5	6.8
2005	7	1	182	6.2	6.7	7.3	5.2	7.4	8.8	7.6	6.5	6.3	7.1
2005	7	2	183	6.3	6.7	7.3	5.5	7.3	8	7.9	6.7	6.1	7
2005	7	3	184	6.7	6.9	7.7	5.5	7.4	8.2	7.6	6.4	5.9	7.7
2005	7	4	185	6.9	7	8	5.3	7.7	9.1	7	5.9	6.1	8
2005	7	5	186	5.7	6	7.1	5	6.6	7.6	6.1	5.1	7.5	6.4
2005	7	6	187	6.8	6.9	8	5.3	7.6	9.2	7	6.1	5.7	7.9
2005	7	7	188	5.9	6.3	7.3	5.9	7	7.5	7.7	6.4	6.6	6.5
2005	7	8	189	5.4	6.4	6.5	4.9	7.8	8.8	8.1	7.3	5.9	6
2005	7	9	190	6.8	7.2	7.4	4.9	8.2	9.8	8.5	7.5	5.7	7.8
2005	7	10	191	8	7.9	8.4	5.3	8.4	10.5	8.4	7.1	5.9	9.6
2005	7	11	192	7.3	7.4	8.2	5.5	8.1	10.1	8.4	7.6	6.1	8.5
2005	7	12	193	6.8	7.2	7.7	5.6	8.1	9.6	8.8	7.6	6.2	7.8
2005	7	13	194	6.6	7	7.7	5.8	7.7	8.8	9.1	7.3	6.5	7.4
2005	7	14	195	5.4	5.8	6.7	5.7	6.3	6.6	7.1	6.2	6.9	5.8
2005	7	15	196	5.7	6.2	6.9	5.4	6.9	7.1	7	5.9	6.4	6.3
2005	7	16	197	5.1	5.9	6	4.7	6.9	7.3	6.7	6.1	5	5.6
2005	7	17	198	5.5	6.3	6.4	4.8	7.3	8.1	7.5	6.9	5.2	6.2
2005	7	18	199	5.7	6.5	6.6	4.9	7.4	8.6	8.3	6.4	5.8	6.4
2005	7	19	200	6	6.7	6.7	4.8	7.5	8.7	8.5	6.8	6.2	6.8
2005	7	20	201	6.3	6.9	7.2	5.2	7.7	9.3	9.1	6.7	6.2	7.1
2005	7	21	202	6.4	7	7.2	5.5	7.6	8.3	9.2	6.8	6.8	7.1
2005	7	22	203	6.1	6.6	7.3	5.3	7.2	9	8.8	6.9	7.3	6.9
2005	7	23	204	5.6	6.3	6.5	4.8	7.2	8.3	7.6	6.4	5.8	6.3
2005	7	24	205	6	6.6	6.9	4.7	7.3	8.8	7.8	6.2	6.6	6.9
2005	7	25	206	5.7	6.3	6.7	4.8	6.9	8.5	7.9	6.4	5.8	6.4
2005	7	26	207	5.5	6.3	6.5	4.7	6.9	8.6	8.4	7.1	5.9	6.2
2005	7	27	208	6.3	6.7	7.2	4.9	7.1	9	8.6	6.9	6.1	7.3
2005	7	28	209	5.5	6.3	6.6	4.9	7.2	8.6	8.6	7.4	6.8	6.1
2005	7	29	210	5.2	6.1	6.2	4.5	7	8.3	8.2	6.9	5.9	5.9
2005	7	30	211	5.5	6.2	6.6	4.7	6.8	8.5	8	6.5	5.4	6.2
2005	7	31	212	5	5.8	6	4.5	6.5	7.5	7.4	5.9	5.4	5.5
2005	8	1	213	5.8	6.4	6.8	4.6	6.9	8.2	7.5	5.3	4.8	6.7
2005	8	2	214	5.3	5.5	6.3	4.7	5.7	6.9	7.2	6.5	5.9	6
2005	8	3	215	4.8	5.5	6	4.7	6	7	7.3	5.8	5.4	5.3
2005	8	4	216	4.7	5.6	6.1	4.8	6.3	7.5	7.7	5.7	4.2	5.1
2005	8	5	217	4.7	5.6	6.1	5.2	6.4	7.2	7.5	6.1	6	5.1
2005	8	6	218	5.1	5.6	6.4	5.6	6.2	6.3	7.2	6	6.5	5.4
2005	8	7	219	5.3	5.6	6.7	5.3	6	6.5	6.7	5.3	6.3	5.8
2005	8	8	220	5.8	6	7.1	5.6	6.5	7.2	7.1	6.4	6.7	6.5
2005	8	9	221	6	6.2	7.3	5.4	6.7	8.2	7.8	6.2	6.4	6.7
2005	8	10	222	5.7	6.1	6.9	5.2	6.8	7.9	7.5	6.6	5.8	6.4
2005	8	11	223	6.2	6.4	7.2	4.9	6.8	8.5	7.7	6.1	5.9	7.1
2005	8	12	224	5.2	5.9	6.6	5.2	6.5	7.9	8.1	6.4	6.4	5.7
2005	8	13	225	4.9	5.5	6.2	5.9	5.7	6.6	8.5	6.4	7.2	5.1
2005	8	14	226	5.3	5.9	6.8	5.5	6.3	8.1	8.9	6.2	7.2	5.8
2005	8	15	227	4.9	5.4	6.2	5.4	5.6	7.3	8.4	6.8	7.5	5.2
2005	8	16	228	4.8	5.2	5.9	5.4	5.3	6.1	7.7	6.6	7.8	5
2005	8	17	229	4.8	5.3	6.1	5.2	5.7	6.4	7.4	6	7	5.2
2005	8	18	230	4.9	5.2	6	5.3	5.5	6.2	7.1	6.4	7.2	5.3
2005	8	19	231	4.5	4.9	5.5	5.2	5	5.3	6.9	6.1	7.4	4.8
2005	8	20	232	4.4	4.7	5.2	5.5	4.4	4.1	7.1	5.9	7.6	4.5
2005	8	21	233	5.1	5.2	6.1	5	5.4	6.6	7	5.9	6.4	5.6
2005	8	22	234	5.2	5.3	6.2	5.2	5.5	6.7	7.5	6.2	6.4	5.7
2005	8	23	235	4.6	5.3	5.8	5	5.7	6.4	7.9	5.8	6.7	4.9
2005	8	24	236	4.8	5.2	5.9	5	5.6	5.9	7	5.8	6.9	5.2
2005	8	25	237	4.5	4.9	5.6	5.1	5.1	5.5	6.4	5	7.9	4.9
2005	8	26	238	4.4	4.8	5.4	5	5	5.5	6.6	5.6	6.2	4.6
2005	8	27	239	4.4	4.7	5.4	5.1	5	5.2	6.4	5.2	6.9	4.6
2005	8	28	240	4.4	4.6	5.2	4.9	4.7	5	6.4	5.7	5.7	4.6
2005	8	29	241	5	5.2	6	5.2	5.3	6.2	7.2	5.7	6	5.5
2005	8	30	242	4.8	5	5.7	5.1	5	5.8	7.2	5.8	6.1	5.2
2005	8	31	243	4.6	4.9	5.6	4.8	5	5.7	7.1	5.6	7.2	5
2005	9	1	244	4.1	4.8	5.2	4.3	5.5	5.9	6.7	5.3	5.5	4.4
2005	9	2	245	4.5	4.9	5.6	4.3	5.5	6.2	6.2	5	6.1	5
2005	9	3	246	4.2	4.6	5.1	3.9	4.8	5.3	5.9	4.5	4.6	4.6
2005	9	4	247	3.9	4.2	4.8	3.9	4.3	5	5.8	4.4	6.5	4.2
2005	9	5	248	4	4.3	5	4.1	4.7	5	5.3	4.3	4.8	4.4
2005	9	6	249	3.7	4.1	4.6	4.2	4.4	4.7	5.2	4.9	6.2	3.9
2005	9	7	250	4	4.4	5	4.7	4.9	5	6.1	5.2	4.5	4.1
2005	9	8	251	3.9	4.1	4.6	4.7	4.1	3.9	6.2	5.1	5.9	4
2005	9	9	252	3.6	3.8	4.2	4.4	3.8	3.5	5.9	4.9	5.3	3.7
2005	9	10	253	3.7	3.9	4.4	4.3	4.1	4.1	5.6	4.7	7.6	3.8
2005	9	11	254	4	4.2	4.8	4.4	4.4	4.5	5.6	4.5	5.6	4.3
2005	9	12	255	3.8	4.1	4.6	4.4	4.3	4.4	5.7	4.5	5.2	4
2005	9	13	256	4.3	4.8	5.5	4.3	5.3	6.9	6.3	4.7	5.2	4.8
2005	9	14	257	3.8	4.7	4.9	3.7	5.6	6.4	6.5	4.8	5.1	4.1
2005	9	15	258	3.7	4.6	4.8	3.5	5.7	6.4	5.8	4.8	4.5	4
2005	9	16	259	3.5	4.5	4.6	3.1	5.3	6.4	5.7	5.1	4.1	3.9
2005	9	17	260	3.3	4.5	4.5	2.9	5	6.2	5.9	4.7	4.5	3.8
2005	9	18	261	3.3	4.5	4.4	2.9	5.6	6.4	5.9	4.9	4.1	3.6
2005	9	19	262	4.1	4.8	5.1	3.4	5.5	6.9	6.3	4.8	4.1	4.6
2005	9	20	263	4.4	4.9	5.3	3.4	5.3	6.9	6.3	4.7	4.6	5.1
2005	9	21	264	4	4.6	5	3.4	5.2	6.3	5.8	4.6	4.5	4.6
2005	9	22	265	4.1	4.5	5	3.4	5	6	5.4	4.5	4.3	4.7
2005	9	23	266	3.7	4.2	4.8	3.6	4.8	5.4	5	3.6	5.2	4.1
2005	9	24	267	3	3.2	3.5	3.1	3.2	3.6	4.8	3.7	5.1	3.3
2005	9	25	268	2.9	3.2	3.6	2.8	3.2	3.9	4.3	3.1	4.3	3.2
2005	9	26	269	3.3	3.6	4	3.1	3.8	4.6	4.7	4	3.2	3.7
2005	9	27	270	3.2	3.6	4.1	3.2	4	5	4.8	4.2	4.2	3.5
2005	9	28	271	3.3	3.9	4.2	2.7	4.1	5.2	4.9	3.7	3.3	3.8
2005	9	29	272	2.8	3.5	3.6	2	2.8	3.8	4	3	3.2	3.3
2005	9	30	273	3.3	3.9	4.3	3	4.7	5.3	4.2	3.7	2.9	3.8
2005	10	1	274	2.8	3.5	3.8	3.1	4.4	4.5	4.4	3.8	4.1	3
2005	10	2	275	2.7	3.4	3.7	3	4.2	4.3	4.4	3.6	3.1	2.9
2005	10	3	276	2.4	3	3.1	2.1	2.7	3.3	4	2.9	2.5	2.6
2005	10	4	277	3.3	3.8	4.2	3.1	4.5	4.8	4.5	3.6	2.2	3.6
2005	10	5	278	3	3.4	3.7	3.5	3.9	4	4.5	3.4	4.6	3.1
2005	10	6	279	2.7	3.1	3.3	3.3	3.4	3.3	4.3	3.7	4.1	2.8
2005	10	7	280	2.7	3.2	3.6	3	3.8	4.3	4.3	3.6	2.7	2.9
2005	10	8	281	2.7	3.2	3.5	3	3.8	4.3	4.1	3.4	3.8	2.9
2005	10	9	282	2.6	3.1	3.3	2.7	3.6	3.9	4	3.6	3.2	2.7
2005	10	10	283	2.7	3.2	3.5	3	3.8	3.9	4.4	3.3	3.8	2.9
2005	10	11	284	2.8	3.2	3.5	3.1	3.6	4.1	5	3.7	3.9	3
2005	10	12	285	2.8	3.1	3.5	2.9	3.7	4.2	4.2	3.4	3.9	3
2005	10	13	286	2.6	3	3.2	2.9	3.3	3.8	4.7	3.7	3.4	2.8
2005	10	14	287	2.7	3	3.2	3.2	3.3	3.4	4.6	3.1	2.9	2.8
2005	10	15	288	2.6	2.9	3.1	2.8	3.2	3.5	4.1	3.1	3.4	2.8
2005	10	16	289	2.3	2.5	2.7	2	2.3	3.1	3.6	2.9	3.8	2.6
2005	10	17	290	2.9	3.3	3.4	1.7	3.2	3.7	2.7	2.4	1.4	3.4
2005	10	18	291	2.4	2.9	3.1	1.7	2.8	3.5	3.1	2.4	2.4	2.8
2005	10	19	292	1.6	2	2.1	1.1	0.8	1.4	2.1	1.8	0.6	1.9
2005	10	20	293	1.9	2.1	2.3	2	2.5	1.9	2	2.2	2.5	2.1
2005	10	21	294	1.7	2	2.2	1.9	2.5	2.1	2.1	2.1	1.7	1.8
2005	10	22	295	1.9	2.3	2.5	2	3	3.1	2.3	2.2	3.8	2
2005	10	23	296	1.9	2.5	2.7	1.8	3.2	3.5	2.6	2.3	2.5	2.1
2005	10	24	297	1.8	2.4	2.6	1.9	3.1	3.2	2.8	2.5	2.1	2
2005	10	25	298	1.9	2.5	2.7	1.9	3.1	3.5	3.1	2.8	2.1	2
2005	10	26	299	2.1	2.7	2.9	1.9	3.2	3.9	3.5	2.7	2.5	2.4
2005	10	27	300	1.9	2.7	2.8	1.8	3.4	4.1	3.7	2.8	1.9	2.1
2005	10	28	301	1.9	2.6	2.7	1.7	3.1	3.6	3.3	2.7	3.4	2.1
2005	10	29	302	1.7	2.2	2.3	1.3	1.8	2.2	2.6	2.2	1.5	2
2005	10	30	303	0.9	1	1	1.2	0.7	0.6	1.9	1.4	2.1	0.9
2005	10	31	304	1.2	1.6	1.6	1	0.9	1.3	1.7	1.1	1.6	1.3
2005	11	1	305	1.4	1.9	1.9	1.2	2	1.9	1.7	1.8	-999	1.5
2005	11	2	306	1.2	1.6	1.6	1.1	1.2	1.4	1.7	1.1	-999	1.3
2005	11	3	307	1.1	1.5	1.5	1.1	1.2	1.5	1.9	1.3	-999	1.2
2005	11	4	308	1.5	1.7	1.8	0.8	0.1	0.7	1.7	1.3	-999	1.8
2005	11	5	309	1.3	1.4	1.5	1.2	1.3	1.3	1.8	1.6	-999	1.4
2005	11	6	310	1.4	1.6	1.7	1.2	1.5	1.7	1.8	1.4	-999	1.6
2005	11	7	311	1	1.2	1.3	0.8	0.2	0.6	1.7	1	-999	1.2
2005	11	8	312	1.4	1.6	1.7	1.5	1.9	1.6	2.3	1.9	-999	1.5
2005	11	9	313	1.2	1.4	1.4	1.5	1.7	1.1	2.1	1.8	-999	1.3
2005	11	10	314	1.4	1.7	1.8	1.4	2.2	2.2	2.3	1.7	-999	1.5
2005	11	11	315	1.3	1.6	1.7	1.4	2	1.9	2.3	1.9	-999	1.4
2005	11	12	316	1.3	1.8	2	1.1	2.2	2.5	2	1.8	-999	1.5
2005	11	13	317	1.2	1.5	1.6	1.2	1.7	1.9	2	1.6	-999	1.2
2005	11	14	318	1.2	1.6	1.6	1.3	1.9	1.8	2.2	1.7	-999	1.3
2005	11	15	319	1.2	1.4	1.5	1.1	1.2	1.5	2.1	1.3	-999	1.3
2005	11	16	320	1.3	1.5	1.6	1.1	1.4	1.8	2.3	1.6	-999	1.5
2005	11	17	321	1.1	1.5	1.6	1.1	1.8	2	2	1.8	-999	1.2
2005	11	18	322	1	1.3	1.4	0.8	0.5	1	1.8	1.1	-999	1.1
2005	11	19	323	1	1.1	1.1	1	0.9	0.9	1.9	1.3	-999	1
2005	11	20	324	0.9	1.2	1.2	0.8	0.5	0.7	1.7	1	-999	1
2005	11	21	325	1.1	1.4	1.4	0.9	1	0.9	1.6	1.1	-999	1.3
2005	11	22	326	1.2	1.5	1.6	0.9	1.8	1.4	1.4	1.2	-999	1.4
2005	11	23	327	1	1.6	1.6	0.7	1.2	1.2	1.1	1	-999	1.2
2005	11	24	328	0.8	1.5	1.6	0.7	2.2	2.2	1.4	1.5	-999	1
2005	11	25	329	1	1.6	1.6	0.8	1.7	1.9	1.6	1.4	-999	1.1
2005	11	26	330	0.9	1.7	1.7	0.7	2	2.5	2.1	1.5	-999	1
2005	11	27	331	0.8	1.7	1.6	0.8	1.2	1.9	2.1	1.5	-999	0.9
2005	11	28	332	1	1.5	1.4	1	1.6	1.6	2.6	1.8	-999	1.1
2005	11	29	333	1	1.8	1.7	0.8	0.9	1.6	2.3	1.2	-999	1.1
2005	11	30	334	0.9	1.6	1.7	0.8	2	2.5	2.2	1.6	-999	1
2005	12	1	335	1	1.7	1.7	0.6	2.1	2.3	2.1	1.6	-999	1.2
2005	12	2	336	0.9	1.7	1.6	0.7	1.4	1.9	2.1	1.3	-999	1
2005	12	3	337	1	1.7	1.7	0.7	0.9	1.4	2	1.1	-999	1.2
2005	12	4	338	1	1.5	1.5	0.8	1.5	1.7	2.3	1.6	-999	1.1
2005	12	5	339	0.9	1.1	1.1	1	1.4	1.1	2.3	1.6	-999	0.9
2005	12	6	340	1	1.3	1.4	0.9	1.5	1.6	2.2	1.5	-999	1.1
2005	12	7	341	0.9	1.2	1.2	1	1.4	1.2	2.5	1.4	-999	1
2005	12	8	342	0.9	1.4	1.4	0.9	1.5	1.9	2.5	1.3	-999	1
2005	12	9	343	0.9	1.3	1.3	0.9	1.4	1.5	2.3	1.5	-999	0.9
2005	12	10	344	0.8	1.1	1.1	0.9	1.1	1.1	2.3	1.4	-999	0.9
2005	12	11	345	0.9	1.3	1.3	0.9	1.4	1.3	2.4	1.6	-999	0.9
2005	12	12	346	0.9	1.2	1.2	0.9	1.3	1.2	2.4	1.6	-999	1
2005	12	13	347	1	1.3	1.4	0.9	1.7	1.5	2.4	1.2	-999	1.1
2005	12	14	348	1	1.3	1.3	0.9	1.5	1.3	2.1	1.2	-999	1.2
2005	12	15	349	0.9	1.1	1.2	0.8	0.8	1.1	1.8	1	-999	1.1
2005	12	16	350	0.8	1.1	1.1	0.7	0.5	0.5	1.4	0.9	-999	0.9
2005	12	17	351	1.6	2	2.1	0.7	0.6	1.2	1.5	1	-999	2
2005	12	18	352	1.5	1.8	2	0.7	0.4	1	1.5	0.6	-999	1.8
2005	12	19	353	1.3	2	2	0.7	0.3	0.9	1.4	0.7	-999	1.6
2005	12	20	354	1.3	1.7	1.8	0.6	1	1.3	1.4	0.8	-999	1.7
2005	12	21	355	1	1.5	1.6	0.6	0.5	0.8	1.1	0.8	-999	1.2
2005	12	22	356	0.8	1.4	1.4	0.5	1.1	1.2	1.1	1	-999	0.9
2005	12	23	357	1	1.5	1.5	0.6	0.8	1	1.1	0.7	-999	1.2
2005	12	24	358	0.8	1.3	1.3	0.6	-0.1	0.1	0.7	0.5	-999	1
2005	12	25	359	1	1.3	1.4	0.5	0.8	0.7	0.7	0.6	-999	1.2
2005	12	26	360	1.2	1.4	1.5	0.4	1.7	1.3	0.7	1	-999	1.5
2005	12	27	361	0.7	1.2	1.3	0.4	1.4	1	0.8	0.7	-999	0.9
2005	12	28	362	0.7	1.2	1.2	0.5	1.5	1.1	0.8	1	-999	0.8
2005	12	29	363	0.7	1.2	1.2	0.5	0.6	0.6	0.7	0.7	-999	0.7
2005	12	30	364	0.7	1.3	1.3	0.4	1.6	1.4	1.1	1.3	-999	0.8
2005	12	31	365	0.8	1.4	1.4	0.6	0.7	0.8	1.1	0.9	-999	1
2006	1	1	1	0.7	1	1	0.6	0.9	0.5	1.1	1.1	-999	0.7
2006	1	2	2	0.7	0.9	0.9	0.7	0.9	0.6	1.3	0.8	-999	0.7
2006	1	3	3	0.7	0.9	0.9	0.8	1	0.6	1.3	1.1	-999	0.7
2006	1	4	4	1.1	1.2	1.3	0.7	1	0.8	1.3	1	-999	1.3
2006	1	5	5	0.8	0.9	1	0.7	0.1	0.3	1.3	0.5	-999	0.9
2006	1	6	6	0.7	0.8	0.8	0.9	1.1	0.5	1.5	1	-999	0.7
2006	1	7	7	0.8	1.2	1.2	0.7	0.7	0.9	1.3	0.8	-999	0.9
2006	1	8	8	0.7	1	1	0.7	0.5	0.4	1.2	0.7	-999	0.7
2006	1	9	9	0.7	0.9	0.9	0.8	1	0.5	1.2	1.1	-999	0.7
2006	1	10	10	0.6	0.9	0.9	0.6	0.3	0.2	0.9	0.6	-999	0.7
2006	1	11	11	0.7	1.1	1.1	0.6	-0.1	0.1	0.7	0.4	-999	0.8
2006	1	12	12	0.8	1.1	1.1	0.7	0.7	0.6	1.1	0.8	-999	0.8
2006	1	13	13	0.6	0.9	0.9	0.6	-0.1	0.1	0.9	0.6	-999	0.6
2006	1	14	14	0.7	1	1	0.7	0.9	0.6	1	0.9	-999	0.8
2006	1	15	15	0.7	1.1	1.1	0.8	1.5	0.8	1.1	1.1	-999	0.8
2006	1	16	16	0.9	1.1	1.2	0.8	1.5	0.7	0.9	1.1	-999	1
2006	1	17	17	0.9	1.2	1.2	0.7	1.5	0.9	0.9	1.1	-999	1
2006	1	18	18	0.6	0.9	0.9	0.6	0	0.1	0.6	0.5	-999	0.6
2006	1	19	19	0.6	0.9	0.8	0.6	0.4	0.1	0.6	0.7	-999	0.6
2006	1	20	20	0.7	0.8	0.9	0.6	0	0.1	0.8	0.7	-999	0.8
2006	1	21	21	0.8	0.9	1	0.9	1.2	0.3	0.7	1.2	-999	0.9
2006	1	22	22	0.6	0.8	0.8	0.7	0.4	0.1	0.6	0.5	-999	0.7
2006	1	23	23	0.6	0.9	0.9	0.6	0.4	0.1	0.5	0.5	-999	0.6
2006	1	24	24	0.7	1	1	0.6	0.1	0.2	0.7	0.7	-999	0.7
2006	1	25	25	0.7	1	1	0.7	0.2	0.3	1	0.8	-999	0.7
2006	1	26	26	0.8	1.2	1.2	0.9	1.2	0.7	1.1	1	-999	0.9
2006	1	27	27	0.9	1.2	1.3	0.9	1.5	0.9	1.1	1.2	-999	0.9
2006	1	28	28	0.8	1.1	1.1	0.8	0.8	0.4	0.9	1	-999	0.9
2006	1	29	29	1.5	1.7	1.8	0.9	1.9	1.1	0.8	1.1	-999	1.8
2006	1	30	30	1	1.4	1.4	1	1.9	1	0.9	1.4	-999	1.2
2006	1	31	31	1.1	1.4	1.4	0.9	1.5	0.7	0.8	1.1	-999	1.2
2006	2	1	32	1.1	1.5	1.5	1	1.7	1	1.1	1.1	-999	1.2
2006	2	2	33	1	1.2	1.3	0.7	0.2	0.3	0.9	0.6	-999	1.2
2006	2	3	34	1.3	1.5	1.5	0.7	0.1	0.4	1.1	1	-999	1.6
2006	2	4	35	1.5	1.8	1.9	1.2	2.2	1.5	1.4	1.6	-999	1.7
2006	2	5	36	1.2	1.5	1.6	0.8	0.5	0.7	1.3	0.9	-999	1.4
2006	2	6	37	1.2	1.5	1.5	0.8	0.2	0.5	1.5	1	-999	1.5
2006	2	7	38	1.1	1.5	1.5	0.9	0.6	0.7	1.4	1.1	-999	1.3
2006	2	8	39	1	1.4	1.4	0.8	0.3	0.6	1.4	1.1	-999	1.1
2006	2	9	40	1	1.4	1.4	0.9	0.8	0.6	1	0.9	-999	1.2
2006	2	10	41	0.9	1.3	1.3	0.9	0.8	0.7	1.3	1.2	-999	1
2006	2	11	42	1.1	1.3	1.3	1.3	1.3	0.7	1.6	1.5	-999	1.1
2006	2	12	43	1	1.2	1.2	1	0.8	0.6	1.4	1.1	-999	1.1
2006	2	13	44	1	1.2	1.2	0.8	0.1	0.3	1.2	1.1	-999	1.1
2006	2	14	45	1.2	1.5	1.5	1.1	1.2	0.8	1.2	1.2	-999	1.3
2006	2	15	46	1.3	1.5	1.6	1.1	1.5	0.7	0.9	1.1	-999	1.4
2006	2	16	47	1.2	1.6	1.6	1.2	2	0.6	0.6	1	-999	1.3
2006	2	17	48	1.1	1.4	1.5	1.1	1.6	0.5	0.5	1.3	-999	1.2
2006	2	18	49	1	1.3	1.3	0.8	0.5	0.4	0.7	0.9	-999	1.1
2006	2	19	50	1.4	1.8	1.8	1.4	2	1.3	1.4	1.8	-999	1.5
2006	2	20	51	1.4	1.8	1.9	1.3	1.6	1.3	1.6	1.5	-999	1.5
2006	2	21	52	1.5	1.9	1.9	1.3	1.5	1.2	1.8	1.5	-999	1.7
2006	2	22	53	2.1	2.5	2.7	1.9	3	2.2	2	2.3	-999	2.4
2006	2	23	54	2	2.5	2.6	2	3.1	2.3	2.3	2.4	-999	2.2
2006	2	24	55	1.8	2.1	2.3	2.1	2.6	1.7	2	2.3	-999	1.9
2006	2	25	56	1.7	2	2.1	2.1	2.2	1.5	2.4	2.2	-999	1.8
2006	2	26	57	1.6	2	2.1	1.9	2.2	1.8	2.1	2.3	-999	1.7
2006	2	27	58	1.8	2.3	2.3	1.8	2.5	1.8	2	2	-999	2
2006	2	28	59	1.7	2.1	2.2	1.6	2.1	1.6	1.9	2	-999	1.9
2006	3	1	60	2.3	2.7	2.8	2	2.9	2.5	2.5	2.2	-999	2.5
2006	3	2	61	2.2	2.6	2.7	1.9	2.8	2.3	2.2	2.1	-999	2.5
2006	3	3	62	2	2.4	2.5	1.8	2.5	1.9	2	2.1	-999	2.2
2006	3	4	63	1.8	2.3	2.3	1.6	2	1.8	2.3	2.1	-999	2
2006	3	5	64	2.4	2.7	2.8	1.9	2.7	2.2	2.1	2.3	-999	2.7
2006	3	6	65	2.9	3.3	3.5	2.2	3.5	3.1	2.6	2.4	-999	3.4
2006	3	7	66	2.4	2.9	3.1	2.1	3.2	3	2.7	2.5	-999	2.7
2006	3	8	67	1.4	1.9	1.9	1	0.2	0.9	2.2	1.9	-999	1.6
2006	3	9	68	1.3	1.8	1.8	1.3	1.2	1.1	1.4	1.4	-999	1.5
2006	3	10	69	1.6	2.1	2.1	1.6	2	1.5	1.4	1.9	-999	1.7
2006	3	11	70	1.9	2.3	2.4	1.9	2.5	1.6	1.5	2.2	-999	2.1
2006	3	12	71	1.8	2.1	2.3	2	2.3	1.4	1.5	2.5	-999	1.9
2006	3	13	72	2.7	3	3.3	2.4	3.2	3	2.5	2.5	-999	3.1
2006	3	14	73	2.2	2.6	2.7	2.1	2.5	2.1	2.5	2.8	-999	2.4
2006	3	15	74	1.6	2	2.1	1.7	1.8	1.3	1.6	1.8	-999	1.8
2006	3	16	75	2.2	2.5	2.7	2	2.5	1.9	1.8	2.1	-999	2.5
2006	3	17	76	2.4	2.8	3.1	2.4	3.3	2.2	1.9	2.4	-999	2.7
2006	3	18	77	1.7	2.1	2.1	1.5	1.4	1.2	1.6	1.9	-999	2
2006	3	19	78	1.1	1.2	1.3	1	0.3	0.6	1.4	1.6	-999	1.2
2006	3	20	79	2.1	2.4	2.6	2.5	2.7	1.7	1.7	2.4	-999	2.2
2006	3	21	80	1.6	1.9	1.9	1.8	1.6	1.3	1.9	2.1	-999	1.7
2006	3	22	81	2.5	2.9	3.2	2.9	3.3	2.7	2.7	2.7	-999	2.7
2006	3	23	82	2.6	3	3.3	2.9	3.4	2.6	2.8	3.4	-999	2.8
2006	3	24	83	2.4	2.7	2.9	2.6	2.5	2.2	3.2	2.8	-999	2.6
2006	3	25	84	2.5	2.8	3.1	2.7	2.8	2.4	2.9	3	-999	2.7
2006	3	26	85	1.9	2.1	2.2	2.2	2	1.4	2.3	2.2	-999	1.9
2006	3	27	86	2	2.3	2.5	2.5	2.3	1.6	2.3	2.6	-999	2.1
2006	3	28	87	2.6	2.9	3.2	3	3.2	2.3	2.6	3.1	-999	2.7
2006	3	29	88	2.6	3	3.3	3.1	3.2	2.2	2.9	3.1	-999	2.7
2006	3	30	89	2.6	3	3.3	3.2	3.4	2.2	2.7	2.9	-999	2.8
2006	3	31	90	2.2	2.5	2.6	2.6	2.5	1.8	2.6	3	-999	2.3
2006	4	1	91	1.7	2	2	2	1.5	1.4	3	2.1	2.2	1.8
2006	4	2	92	1.2	1.5	1.5	1.2	0.5	1	2.8	2.5	2.6	1.4
2006	4	3	93	2.1	2.4	2.6	2.3	2.1	1.8	2.4	2.4	0.4	2.3
2006	4	4	94	2.1	2.4	2.5	2.5	2.3	1.6	2.2	2.6	1.2	2.1
2006	4	5	95	1.6	1.9	1.9	1.9	1.4	1.2	2.1	1.7	3.2	1.7
2006	4	6	96	2.7	3.1	3.4	3.2	3.5	2.4	2.6	3.3	1.1	2.9
2006	4	7	97	2.5	2.9	3.2	2.9	3	2.4	2.9	3.3	1.1	2.7
2006	4	8	98	3	3.5	3.7	3.3	4	2.8	3.1	3.8	2.2	3.2
2006	4	9	99	2.8	3.3	3.5	3	3.3	2.9	3.8	3.1	2.7	3.1
2006	4	10	100	3	3.5	3.8	3.4	3.9	3.2	3.7	3.4	4.3	3.1
2006	4	11	101	3.3	3.9	4.2	3.6	4.7	3.7	3.3	3.8	3	3.5
2006	4	12	102	3.7	4.2	4.6	3.6	4.9	4	3.4	3.7	2.5	4.1
2006	4	13	103	2.7	3.2	3.3	2.8	3.1	2.8	3.6	4	3.1	2.9
2006	4	14	104	2.7	3.2	3.4	3	3	2.8	4.3	3.6	2.8	2.9
2006	4	15	105	2.3	2.7	2.7	2.1	1.7	2.2	4.7	2.2	4.6	2.6
2006	4	16	106	3.1	3.3	3.7	3.4	3.2	2.9	4.3	4.5	3.4	3.3
2006	4	17	107	3	3.5	3.7	3.4	3.6	3	4	3.6	3.8	3.2
2006	4	18	108	3.1	3.6	3.8	3.3	3.6	2.9	3.7	3.6	2.7	3.4
2006	4	19	109	3.9	4.4	4.8	4	4.8	3.8	4	4.6	2.1	4.3
2006	4	20	110	3.4	3.9	4.2	3.7	4	3.5	4.9	4.5	3.2	3.7
2006	4	21	111	3.4	3.9	4.2	4.1	4.3	3.3	4.1	3.9	3.4	3.5
2006	4	22	112	3.6	4	4.4	4.2	4.7	3.3	3.8	4.6	3.9	3.7
2006	4	23	113	3.5	4	4.3	4	4.3	3.4	4.5	4.7	3.3	3.7
2006	4	24	114	2.8	3.2	3.5	3.2	3.1	2.6	3.5	3.4	3.3	3
2006	4	25	115	1.6	1.9	1.9	1.7	1.1	1.4	2.9	2.6	3.3	1.7
2006	4	26	116	3.5	4.1	4.4	4.1	5	3.4	3	3.9	1.9	3.7
2006	4	27	117	3.4	4	4.2	3.9	4.9	3.2	2.8	4.1	3.1	3.6
2006	4	28	118	2.9	3.5	3.6	3.3	3.7	3	3.3	4.4	4.1	3
2006	4	29	119	3.4	3.9	4.3	3.6	4.1	3.9	4.2	4	2.1	3.7
2006	4	30	120	4.1	4.6	5.1	4	5	4.3	4.1	4.2	3	4.6
2006	5	1	121	3.8	4.4	4.7	4	5	4.1	4	4.3	3.1	4.1
2006	5	2	122	3.2	3.6	3.9	3.6	3.6	3.3	4.1	4.6	3.9	3.3
2006	5	3	123	3.6	4.1	4.5	4.1	4.6	3.9	4.2	4.7	3.2	3.8
2006	5	4	124	4.1	4.6	5	4.4	5.5	4.3	3.9	5	3.6	4.4
2006	5	5	125	4.2	4.9	5.2	4.6	5.9	4.6	4.7	4.5	4.1	4.5
2006	5	6	126	3.5	4.2	4.3	3.9	4.9	4.1	4.2	4.7	4	3.6
2006	5	7	127	3.3	4	4	3.6	4.2	3.6	4.3	4.8	3	3.5
2006	5	8	128	3.7	4.2	4.8	4.4	4.7	4.1	4.3	4.1	3.3	3.9
2006	5	9	129	3.9	4.5	4.9	4.3	5.3	4.2	3.6	4.4	3.7	4.2
2006	5	10	130	4.1	4.7	5	4.6	5.6	4.3	4.3	4.8	5.2	4.3
2006	5	11	131	4.5	5.1	5.5	4.6	5.9	5.1	4.6	5.2	4	4.9
2006	5	12	132	4.7	5.2	5.7	4.8	6.1	5.4	5.2	5.9	4.6	5.1
2006	5	13	133	4.6	5.1	5.6	4.9	5.9	5	5	5.6	5.2	5
2006	5	14	134	4.5	4.9	5.7	5.2	5.4	4.7	4.9	5.3	4.8	4.8
2006	5	15	135	4.2	4.6	5.2	5.1	4.9	3.9	5.3	5.6	5.8	4.4
2006	5	16	136	4.4	4.9	5.5	5	5.6	4.9	5.4	5.3	3.8	4.6
2006	5	17	137	3.5	4.1	4.5	4.1	4.5	4.1	4.3	4.6	4.8	3.7
2006	5	18	138	3.8	4.3	4.7	4.5	4.7	3.8	4.4	4.7	3.1	3.9
2006	5	19	139	4.1	4.8	5.1	4.6	5.5	4.8	5.2	5.6	4.1	4.4
2006	5	20	140	4.3	5.2	5.3	4.8	6.1	5.6	6.1	5.5	4.4	4.5
2006	5	21	141	4.5	5.3	5.5	4.8	6.2	5.7	5.8	5.9	4.9	4.9
2006	5	22	142	4.5	5.2	5.4	4.8	5.9	5.4	6.2	6.5	4.5	4.7
2006	5	23	143	4.9	5.4	5.8	4.7	5.7	6	6.8	6.4	6.2	5.4
2006	5	24	144	4.9	5.6	5.9	5.5	6.2	5.5	7.6	6.1	5.2	5.1
2006	5	25	145	4.8	5.7	5.9	5.4	6.4	6.3	7.9	6.1	6.5	5
2006	5	26	146	5.4	6	6.4	5.2	6.5	7	8.3	6.9	5.9	5.9
2006	5	27	147	5.1	5.8	6.1	5.1	6.6	6.2	6.5	5.7	6.4	5.6
2006	5	28	148	4.7	5.3	5.6	4.6	5.7	5.6	6.4	6.2	6	5.1
2006	5	29	149	5	5.8	6	5.1	6.6	6.3	6.8	6.4	4.8	5.5
2006	5	30	150	4.9	5.7	5.9	5.1	6.2	6.3	7.8	7.5	5.4	5.3
2006	5	31	151	5.1	5.8	6.1	5.4	6.6	6.3	7.6	7.1	5.5	5.4
2006	6	1	152	4.4	5	5.4	4.7	5	5.6	7.9	7.2	6.3	4.7
2006	6	2	153	4.9	5.5	5.9	5.4	5.6	5.8	8.8	7.7	5.3	5.2
2006	6	3	154	4.7	5.3	5.6	5	5.5	5.9	8.6	7.8	6.7	4.9
2006	6	4	155	5.2	6	6.2	5.4	6.6	6.9	8.6	7.8	5.9	5.6
2006	6	5	156	5.4	6.1	6.4	5.6	6.6	6.9	8.8	7.7	7	5.8
2006	6	6	157	5.6	6.2	6.6	5.5	6.7	7.1	8.7	7.2	6.5	6
2006	6	7	158	5.8	6.4	6.9	5.4	7.5	7.3	6.5	5.9	8.2	6.4
2006	6	8	159	5.4	6	6.4	5.1	6.9	6.5	5.8	5.9	6.6	6
2006	6	9	160	5.2	5.8	6.2	5.1	6.9	6.4	5.6	5.6	5.2	5.7
2006	6	10	161	5.3	5.9	6.1	4.8	6.9	6.3	5.2	5.9	5.4	5.9
2006	6	11	162	5.2	5.8	6.1	4.9	7	6.6	5.3	6	4.6	5.7
2006	6	12	163	6.1	6.5	6.9	5.4	7.4	7.2	6.6	6.6	5.3	6.9
2006	6	13	164	5.4	6	6.2	5.1	7	6.7	6.5	6.3	5.6	5.9
2006	6	14	165	4.8	5.7	5.8	5.1	6.7	6.3	6.3	6	5.7	5.2
2006	6	15	166	4.9	5.6	5.8	5.1	6.8	6.1	5.7	6.5	5.3	5.2
2006	6	16	167	5.1	5.7	6	5	6.8	6.2	5.8	6.4	5.5	5.6
2006	6	17	168	5.9	6.3	6.6	5.1	7	7	6.8	7.1	4.1	6.6
2006	6	18	169	6	6.4	6.8	5.3	7.1	7.3	7.8	7.1	5.6	6.7
2006	6	19	170	6.9	7.1	7.5	5.4	7.3	8.2	8.5	7	5.8	7.9
2006	6	20	171	6.5	6.8	7.2	5.4	7.2	7.8	8	7	5.9	7.3
2006	6	21	172	5.9	6.4	6.7	5.2	6.9	7.2	7.7	7.3	5.6	6.6
2006	6	22	173	5.8	6.3	6.5	5.1	6.9	6.9	7.2	7.2	5.3	6.5
2006	6	23	174	4.8	5.6	5.8	5.1	6.4	6.4	7.4	7.2	6.3	5.1
2006	6	24	175	5.6	6.2	6.5	5.2	6.9	7.3	7.6	7	5.7	6.1
2006	6	25	176	5.7	6.3	6.6	5.2	7.2	7.6	7.7	7.2	5.6	6.3
2006	6	26	177	6.2	6.6	6.8	5.1	7.2	7.5	7.3	6.8	5.4	7.1
2006	6	27	178	6	6.5	6.8	5.1	7.1	7.7	7.5	6.4	5.4	6.8
2006	6	28	179	5.3	6	6.1	5.1	6.9	6.7	7	6.2	5.1	5.8
2006	6	29	180	5.6	6.1	6.2	4.6	6.4	6.8	6.9	6.2	3.6	6.4
2006	6	30	181	5.3	6	6.1	4.8	6.6	7	7.2	6.9	5.4	6
2006	7	1	182	5.9	6.4	6.6	4.9	6.8	7.5	7.9	6.6	4.9	6.8
2006	7	2	183	5.8	6.1	6.3	4.6	6.4	6.8	7	7.3	5.4	6.7
2006	7	3	184	5.6	6	6.2	4.3	5.7	6.6	7.7	6.3	4.5	6.5
2006	7	4	185	6	6.5	6.7	4.8	6.9	7.6	7.4	6.2	4	6.9
2006	7	5	186	5.2	6	6.2	4.9	6.9	7.1	6.6	5.8	5	5.7
2006	7	6	187	5.1	5.9	6	4.8	6.7	6.9	6.7	6.1	4.6	5.7
2006	7	7	188	5.9	6.3	6.5	4.5	6.6	7.2	6.7	6.1	4.8	6.8
2006	7	8	189	6.7	7	7.3	5.1	7.6	8	6.6	6	3	7.8
2006	7	9	190	5.8	6.3	6.7	5.2	7.1	7.4	7.4	6.5	5.6	6.4
2006	7	10	191	5.2	6	6.2	5.3	6.8	6.8	7.6	6.5	6.3	5.6
2006	7	11	192	6	6.4	7.1	5.5	6.8	7.4	7.7	6.6	5.8	6.8
2006	7	12	193	6.8	7	7.5	5.6	7.8	8.2	8	7.5	5.9	7.7
2006	7	13	194	5.9	6.5	6.8	5.3	7.3	7.7	7.9	6.5	5.6	6.6
2006	7	14	195	5.8	6.3	6.7	5.1	6.9	7.1	7.1	5.8	6	6.6
2006	7	15	196	6.7	6.9	7.5	5.2	7.2	8	7.4	6.4	5.8	7.8
2006	7	16	197	7.1	7.2	7.7	5.3	7.5	8.6	8	7.1	5.3	8.3
2006	7	17	198	7.2	7.4	7.9	5.4	7.8	9.2	8.5	6.8	5.2	8.4
2006	7	18	199	6.6	6.9	7.3	5.2	7.4	8.6	8.5	7.4	6.7	7.5
2006	7	19	200	5.8	6.5	6.8	5.3	7.2	8.1	8.7	6.7	5.5	6.4
2006	7	20	201	5.3	6.2	6.4	5.4	7.4	7.9	8.2	6.9	7	5.7
2006	7	21	202	5.1	5.9	6.1	5	6.8	7	7.6	6.4	7	5.5
2006	7	22	203	5.2	6	6.2	4.9	6.8	7.2	7.4	6.2	6	5.8
2006	7	23	204	5.7	6.2	6.5	5	6.9	7.4	7.4	6.3	5	6.4
2006	7	24	205	4.8	5.6	5.8	4.9	6.3	6.3	7.7	6.6	5.3	5.2
2006	7	25	206	5.1	6	6.1	4.9	6.6	7.3	8.3	6.9	5.1	5.6
2006	7	26	207	5	5.9	6	4.9	6.7	7	7.6	6.5	5.6	5.5
2006	7	27	208	4.9	5.8	5.9	5	6.5	6.8	8.1	6.6	5.2	5.3
2006	7	28	209	5.7	6.3	6.6	4.9	7	7.8	7.6	6	5.4	6.4
2006	7	29	210	5.3	6	6.3	4.5	6.6	7.7	7.7	6	6.3	6
2006	7	30	211	4.9	5.8	6	4.9	6.7	7.1	7.7	6.6	5.6	5.3
2006	7	31	212	4.6	5.8	5.8	4.8	7	7.7	7.8	6.6	6.8	5
2006	8	1	213	4.6	5.6	5.8	4.8	6.7	7.2	7.4	6.3	5.1	4.9
2006	8	2	214	5.3	6	6.2	4.9	6.8	7.1	7.6	6.7	5.6	5.9
2006	8	3	215	6.1	6.3	6.7	4.9	6.5	7.4	8.1	7.2	5.5	6.9
2006	8	4	216	5.9	5.9	7	5.6	6.1	7.5	8.3	7.3	6.3	6.5
2006	8	5	217	5.6	6.2	6.6	5.3	6.9	7.3	8	7.1	5.8	6.2
2006	8	6	218	5.5	5.9	6.7	5.2	6.4	7.7	8.1	7	6.4	6.1
2006	8	7	219	6	6.3	6.7	4.8	6.7	7.6	7.8	6.3	5.9	6.8
2006	8	8	220	4.9	5.7	5.9	4.8	6.4	6.5	7.2	5.7	5.7	5.4
2006	8	9	221	4.9	5.3	6	4.9	5.8	6.2	6.8	5.9	6.2	5.3
2006	8	10	222	4.9	5.5	6	4.9	6	6.5	7.5	6.6	5.5	5.3
2006	8	11	223	5.1	5.8	6.1	4.8	6.4	7.1	7.9	6.6	5.7	5.6
2006	8	12	224	4.8	5.8	5.9	4.6	6.8	7.7	7.8	6.3	5.4	5.2
2006	8	13	225	5.1	5.9	6.1	4.6	6.9	7.6	7.3	6.1	5.4	5.6
2006	8	14	226	5	5.7	5.9	4.6	6.7	6.9	7	6.4	4.6	5.5
2006	8	15	227	4.7	5.5	5.8	4.8	6.3	6.8	7.3	6.8	5.3	5.1
2006	8	16	228	4.7	5.3	5.7	4.6	5.6	6.6	7.9	7.4	4.5	5.2
2006	8	17	229	5.4	5.7	6.2	4.9	5.9	6.6	8.2	7	5	6
2006	8	18	230	5.2	5.4	5.8	4.2	5	6.4	8.4	7.2	5.8	5.9
2006	8	19	231	4.7	5.1	5.4	4.1	4.6	5.9	8.6	6.8	5.5	5.3
2006	8	20	232	4.1	4.8	5.1	4.2	4.5	5.7	9.2	6	7.7	4.4
2006	8	21	233	3.7	4.3	4.5	3.6	3.7	5.2	8.7	6.2	7.7	4
2006	8	22	234	4.6	5.3	5.7	4.7	5.6	6.5	8.3	6.3	4.5	4.9
2006	8	23	235	5.1	5.5	6.1	4.7	5.7	6.9	8	6.2	6	5.7
2006	8	24	236	5.1	5.6	6.1	4.7	6	7	7.5	6.3	5.9	5.7
2006	8	25	237	4.1	4.9	5.1	3.7	4.8	6.2	7.8	6.7	5.6	4.5
2006	8	26	238	4.5	5.4	5.6	4.5	5.7	6.8	8.4	6.3	4.8	4.9
2006	8	27	239	4.3	5.2	5.4	4.3	5.8	6.5	7.3	5.5	5.7	4.7
2006	8	28	240	4.1	5.1	5.3	4.2	5.6	6.4	7.4	5.4	5.3	4.5
2006	8	29	241	4.1	4.9	5.3	4.4	5.6	6.2	6.9	4.9	5	4.4
2006	8	30	242	4.3	5.1	5.4	4.5	5.8	6.1	6.7	5.6	6	4.7
2006	8	31	243	4.2	4.9	5.3	4.4	5.5	6	6.9	5.7	5	4.5
2006	9	1	244	4.2	4.8	5.3	4.6	5.4	5.4	6.3	5.1	4.7	4.5
2006	9	2	245	4	4.6	5.1	4.4	5.3	5.6	6	5.1	5.2	4.2
2006	9	3	246	4	4.6	5	4.1	5.2	5.4	5.8	4.9	5.1	4.4
2006	9	4	247	4.2	4.8	5.3	4.5	5.5	5.8	6.4	5.3	5.2	4.5
2006	9	5	248	4.4	4.8	5.4	4.6	5.2	5.7	6.9	5.6	5.3	4.8
2006	9	6	249	4.2	4.8	5.3	4.4	5.2	5.8	6.8	5.3	6.3	4.6
2006	9	7	250	4.3	4.7	5.3	4.2	4.8	5.6	6.6	5.2	5.3	4.8
2006	9	8	251	4.7	5	5.6	4.2	5.2	6	6.4	5.1	5.1	5.3
2006	9	9	252	4.7	4.9	5.5	4.2	5.2	5.8	6.4	5.4	4.6	5.2
2006	9	10	253	4.1	4.7	5.1	4.2	4.7	5.8	7.7	5.5	5.3	4.5
2006	9	11	254	3.9	4.5	5	4.1	4.7	5.6	6.9	4.9	5.8	4.2
2006	9	12	255	3.7	4.3	4.7	4.1	4.9	5.1	5.9	5.1	5.8	3.9
2006	9	13	256	3.7	4.3	4.7	4.1	4.7	5.1	5.9	5	5.8	3.9
2006	9	14	257	4.3	4.9	5.4	4.1	5.7	6.2	5.9	4.9	5	4.8
2006	9	15	258	3.4	4.2	4.4	3.8	4.9	4.8	5.6	4.9	5.1	3.6
2006	9	16	259	3.6	4.3	4.7	3.9	4.9	5.3	5.6	4.8	5.2	3.9
2006	9	17	260	4.2	4.6	5.1	3.8	5.1	5.7	5.8	4.4	5.5	4.7
2006	9	18	261	3.4	4.2	4.4	3.9	4.8	4.9	6	5	5.2	3.5
2006	9	19	262	3.2	4	4.2	3.4	4.5	5.1	5.9	4.9	4.5	3.4
2006	9	20	263	3.3	4.1	4.4	3.5	4.8	5.2	5.6	4	4.9	3.5
2006	9	21	264	2.8	3.5	3.6	3	3.8	4	4.9	4	4.6	3
2006	9	22	265	2.9	3.7	3.8	3	4	4.5	4.9	3.7	4	3.1
2006	9	23	266	3	3.6	3.9	2.9	3.8	4.5	4.7	3.7	3.5	3.3
2006	9	24	267	3.7	4.1	4.6	3.3	4.5	5.1	4.8	3.9	2.5	4.2
2006	9	25	268	2	2.5	2.6	1.7	1.5	2.4	3.8	2.5	4.1	2.3
2006	9	26	269	2.8	3.5	3.7	3	4.3	4.4	4	3.7	3.4	2.9
2006	9	27	270	2.8	3.6	3.8	3.1	4.3	4.5	4.7	3.8	2.5	3
2006	9	28	271	2.8	3.6	3.7	3	4	4.4	5.2	4.1	3	3
2006	9	29	272	2.5	3.2	3.3	2.5	2.9	3.9	5.5	4	3.5	2.8
2006	9	30	273	2.9	3.7	3.9	2.9	4	4.8	5.5	4	3.6	3.1
2006	10	1	274	2.9	3.7	3.9	2.9	4.2	4.8	4.8	3.4	4.4	3.2
2006	10	2	275	2.7	3.3	3.5	3	4	3.9	4.3	4	4.2	2.9
2006	10	3	276	2.5	2.9	3.1	2.8	3	3.2	4.5	3.7	2.8	2.6
2006	10	4	277	2.7	3.2	3.5	3.1	3.7	3.9	4.6	3.3	2.8	2.9
2006	10	5	278	2.8	3.3	3.5	2.8	3.6	4.1	4.6	4.1	4.2	3
2006	10	6	279	3	3.6	3.9	3.1	4.2	4.5	4.9	4	2.6	3.2
2006	10	7	280	2.7	3.3	3.4	2.8	3.5	3.9	5	4.1	5.3	2.9
2006	10	8	281	2.4	3.1	3.3	2.7	3.4	4	5	4.1	3.7	2.6
2006	10	9	282	2.5	3.2	3.3	2.7	3.6	4	4.7	3.7	3.1	2.7
2006	10	10	283	2.7	3.1	3.4	2.5	3.2	3.8	4.3	3.4	3.7	3.1
2006	10	11	284	2.5	3.1	3.3	2.5	3.3	3.8	4.4	3.5	2.6	2.8
2006	10	12	285	2.5	3.1	3.3	2.5	3.5	4	4.5	3.1	2.6	2.7
2006	10	13	286	2.3	3	3.1	2.3	3.3	3.6	4	3.3	3	2.5
2006	10	14	287	2.1	2.8	2.8	1.9	2.4	3.1	4.3	2.8	2.8	2.4
2006	10	15	288	2.1	2.4	2.5	1.7	1.9	2.4	3.3	2.2	3	2.4
2006	10	16	289	2	2.3	2.4	2	2.2	2.2	2.9	2.5	0.1	2.3
2006	10	17	290	1.8	2.1	2.2	1.5	1.3	1.8	3	2.2	3.2	2.1
2006	10	18	291	2	2.4	2.6	2.1	2.7	2.8	3.2	2.7	0.1	2.1
2006	10	19	292	2.2	2.6	2.8	2.1	2.5	3.1	4.4	2.7	3.2	2.4
2006	10	20	293	1.8	2.2	2.3	1.6	1.6	2.2	3.2	2.2	3.2	2
2006	10	21	294	1.8	2.2	2.3	2.1	2.4	2.5	3.1	2.9	2.2	1.9
2006	10	22	295	1.7	2.3	2.4	1.9	2.5	2.8	3.3	2.8	2.1	1.8
2006	10	23	296	1.8	2.3	2.4	2	2.6	2.7	3.4	2.9	2.2	1.9
2006	10	24	297	1.6	1.9	2	1.7	1.8	2	3.2	2.8	1.7	1.7
2006	10	25	298	1.1	1.5	1.5	1.3	0.9	1.3	3	1.4	2.3	1.2
2006	10	26	299	1.9	2.4	2.5	1.8	2.6	2.9	3.3	2.6	1.1	2.1
2006	10	27	300	1.4	1.7	1.7	1.1	0.8	1.3	2.5	1.5	2.6	1.6
2006	10	28	301	1.2	1.6	1.6	1.3	1.2	1.3	2.2	1.5	1.8	1.3
2006	10	29	302	0.9	1.3	1.3	0.9	0.2	0.7	2.1	1	2.7	1
2006	10	30	303	1.1	1.5	1.6	1.1	0.8	1.3	2	1.4	0.1	1.2
2006	10	31	304	1.1	1.5	1.5	1	0.5	1.1	2.5	1.2	3.4	1.2
2006	11	1	305	1.4	1.8	1.8	1.1	0.8	1.3	2.4	1.6	-999	1.6
2006	11	2	306	1.6	2	2.1	1.4	2.1	2	2.4	1.6	-999	1.7
2006	11	3	307	1.5	1.8	1.9	1.1	1	1.4	2.4	1.6	-999	1.8
2006	11	4	308	1.2	1.6	1.7	1	0.4	1.1	2.4	1.2	-999	1.4
2006	11	5	309	0.9	1.1	1	1	0.7	0.6	1.6	1.4	-999	0.9
2006	11	6	310	0.7	0.9	0.9	0.8	0.4	0.3	0.9	1	-999	0.7
2006	11	7	311	1.3	1.5	1.6	1.1	1.5	1.3	1.4	1.5	-999	1.4
2006	11	8	312	1.3	1.5	1.6	1.3	1.9	1.4	1.7	1.7	-999	1.4
2006	11	9	313	1.7	1.8	2	1.3	2.1	1.8	1.8	1.7	-999	1.9
2006	11	10	314	1.2	1.5	1.5	1.3	1.9	1.5	1.9	1.8	-999	1.3
2006	11	11	315	1.2	1.3	1.4	1.4	1.7	1.1	1.9	1.6	-999	1.3
2006	11	12	316	1.2	1.3	1.4	1.3	1.6	1.2	1.8	1.6	-999	1.2
2006	11	13	317	1.2	1.5	1.6	1.3	1.9	1.7	2.1	1.8	-999	1.2
2006	11	14	318	1	1.3	1.3	1.1	1.1	1.1	2.1	1.4	-999	1
2006	11	15	319	1.1	1.5	1.6	1.2	1.8	1.7	2	1.4	-999	1.2
2006	11	16	320	1	1.3	1.4	1.1	1.6	1.3	1.8	1.6	-999	1
2006	11	17	321	1.1	1.5	1.6	1.1	2	1.9	2	1.8	-999	1.2
2006	11	18	322	1	1.5	1.5	1.1	2	1.9	2.1	1.9	-999	1.1
2006	11	19	323	1	1.4	1.4	1.1	1.9	1.6	1.9	1.6	-999	1
2006	11	20	324	1.1	1.4	1.5	1	1.8	1.6	1.6	1.6	-999	1.2
2006	11	21	325	1	1.3	1.4	1	1.6	1.4	1.6	1.3	-999	1.2
2006	11	22	326	1	1.3	1.3	0.9	1.5	1.3	1.5	1.2	-999	1.1
2006	11	23	327	1	1.3	1.4	1	1.7	1.4	1.7	1.4	-999	1.1
2006	11	24	328	0.9	1.1	1.1	1.1	1.3	0.8	1.9	1.7	-999	0.9
2006	11	25	329	1	1.3	1.4	1	1.6	1.5	2	1.7	-999	1
2006	11	26	330	1	1.3	1.4	1	1.7	1.5	2.1	1.8	-999	1.1
2006	11	27	331	1	1.3	1.3	1.1	1.6	1.5	2.3	1.8	-999	1.1
2006	11	28	332	1	1.3	1.3	1.1	1.5	1.5	2.3	1.7	-999	1.1
2006	11	29	333	1.2	1.4	1.5	1.1	1.6	1.7	2.4	1.8	-999	1.3
2006	11	30	334	1	1.2	1.2	1.1	1.6	1.3	2.2	1.2	-999	1
2006	12	1	335	1.1	1.3	1.4	1	1.7	1.5	2	1.4	-999	1.3
2006	12	2	336	1.1	1.2	1.3	0.9	1.5	1.3	1.7	1.5	-999	1.2
2006	12	3	337	1	1.2	1.3	0.9	1.5	1.2	1.7	1.4	-999	1.1
2006	12	4	338	0.9	1.2	1.2	0.7	1	0.9	1.4	1	-999	1
2006	12	5	339	1.1	1.2	1.3	0.8	1.4	1.1	1.4	1.1	-999	1.3
2006	12	6	340	0.9	1.1	1.1	0.8	1.1	0.8	1.3	1	-999	1.1
2006	12	7	341	0.8	0.9	0.9	0.8	1	0.6	1.4	1.2	-999	0.8
2006	12	8	342	0.7	0.8	0.8	0.9	1.1	0.5	1.5	1.4	-999	0.7
2006	12	9	343	0.7	0.8	0.8	0.9	1.1	0.5	1.5	1.2	-999	0.7
2006	12	10	344	0.7	0.8	0.8	0.9	1.1	0.6	1.7	1.1	-999	0.7
2006	12	11	345	0.8	1.1	1.1	0.8	1.5	1.3	1.8	1.5	-999	0.8
2006	12	12	346	0.8	1.1	1.1	0.7	0.7	0.7	1.4	1	-999	0.9
2006	12	13	347	0.9	1.1	1.2	0.7	1.4	1.3	1.6	1.3	-999	1
2006	12	14	348	1.1	1.2	1.3	0.7	1.2	1.2	1.6	1.3	-999	1.3
2006	12	15	349	0.7	0.9	0.9	0.7	1.3	0.8	1.3	1	-999	0.7
2006	12	16	350	0.7	0.9	0.9	0.7	1.4	0.9	1.3	1.2	-999	0.7
2006	12	17	351	1.1	1.2	1.3	0.8	1.5	1.5	1.7	1.5	-999	1.2
2006	12	18	352	1.1	1.2	1.3	0.8	1.4	1.3	1.9	1.5	-999	1.2
2006	12	19	353	0.9	1	1	0.8	1.2	0.9	1.6	1.3	-999	1
2006	12	20	354	0.7	0.8	0.8	0.8	1	0.5	1.5	1.3	-999	0.7
2006	12	21	355	0.7	1	1	0.7	1	0.9	1.4	1.2	-999	0.8
2006	12	22	356	0.7	1	1	0.7	1	0.8	1.4	1.1	-999	0.8
2006	12	23	357	0.6	0.9	0.9	0.6	1.2	0.8	1.1	0.9	-999	0.7
2006	12	24	358	0.6	0.8	0.8	0.7	1.2	0.5	1.2	1.3	-999	0.7
2006	12	25	359	0.5	0.8	0.8	0.6	0.5	0.3	0.9	0.9	-999	0.6
2006	12	26	360	0.5	0.7	0.7	0.6	-0.1	0	0.8	0.8	-999	0.5
2006	12	27	361	0.5	0.7	0.7	0.5	0.7	0	0.5	0.7	-999	0.5
2006	12	28	362	0.5	0.7	0.7	0.5	1	0	0.5	0.9	-999	0.5
2006	12	29	363	0.6	0.7	0.8	0.5	1	0.1	0.5	0.8	-999	0.6
2006	12	30	364	0.6	0.7	0.7	0.6	1	0.2	0.8	1.1	-999	0.6
2006	12	31	365	0.6	0.7	0.8	0.6	1.1	0.3	0.8	1	-999	0.6
2007	1	1	1	0.8	1.1	1.2	0.6	1.4	1.1	1	1.1	-999	1
2007	1	2	2	1	1.1	1.2	0.6	1.4	1.2	1.1	1.2	-999	1.2
2007	1	3	3	0.8	0.9	0.9	0.6	0.5	0.4	1	0.9	-999	0.9
2007	1	4	4	1	1.2	1.3	0.6	1.3	0.8	1	0.8	-999	1.2
2007	1	5	5	0.5	0.6	0.5	0.5	0	-0.1	0.6	0.5	-999	0.5
2007	1	6	6	0.8	0.9	1	0.6	1.1	0.4	0.6	0.9	-999	0.9
2007	1	7	7	0.5	0.7	0.7	0.6	0.8	0.1	0.6	0.4	-999	0.6
2007	1	8	8	0.9	1.1	1.2	0.6	1.3	0.8	0.7	1	-999	1.1
2007	1	9	9	0.9	1	1.2	0.7	1.3	0.7	0.8	0.9	-999	1.1
2007	1	10	10	1.1	1.2	1.4	0.7	1.5	1	0.8	0.9	-999	1.3
2007	1	11	11	0.9	1.1	1.2	0.7	1.4	0.7	0.8	0.8	-999	1
2007	1	12	12	0.9	1.1	1.2	0.7	1.4	1.1	1	1	-999	1.1
2007	1	13	13	0.7	0.8	0.8	0.7	0.7	0.4	1	0.9	-999	0.7
2007	1	14	14	0.7	1	1.1	0.8	1.4	1	1	1.2	-999	0.8
2007	1	15	15	0.7	1	1	0.8	1.3	0.9	1.1	1.2	-999	0.7
2007	1	16	16	0.8	1.2	1.2	0.8	1.6	1.5	1.4	1.3	-999	0.9
2007	1	17	17	0.9	1.4	1.4	0.8	1.9	1.6	1.4	1.5	-999	1.1
2007	1	18	18	0.9	1.2	1.3	0.8	1.6	1.3	1.3	1.4	-999	1
2007	1	19	19	0.6	0.7	0.7	0.8	0.5	0.2	1.1	1.1	-999	0.6
2007	1	20	20	0.4	0.5	0.4	0.6	-0.2	0	0.8	0.8	-999	0.4
2007	1	21	21	0.6	0.6	0.6	0.8	0.5	0	0.8	0.8	-999	0.6
2007	1	22	22	1	1.2	1.3	0.9	1.5	1.3	1.2	1.3	-999	1.1
2007	1	23	23	1.2	1.3	1.4	1	1.5	1.4	1.4	1.5	-999	1.4
2007	1	24	24	1	1.2	1.3	1.1	1.6	1.2	1.5	1.5	-999	1.1
2007	1	25	25	1.1	1.3	1.4	1.2	1.8	1.5	1.8	1.5	-999	1.2
2007	1	26	26	1	1.2	1.3	1.1	1.4	1.2	1.8	1.3	-999	1
2007	1	27	27	1.2	1.4	1.5	1.1	1.6	1.6	1.8	1.6	-999	1.3
2007	1	28	28	0.5	0.6	0.6	0.7	0.1	0.1	1.2	0.9	-999	0.5
2007	1	29	29	1.2	1.5	1.6	0.9	1.9	1.2	0.8	1	-999	1.4
2007	1	30	30	0.4	0.5	0.5	0.6	0	-0.2	0.5	0.5	-999	0.4
2007	1	31	31	1.3	1.4	1.6	0.9	1.6	0.9	0.7	1.2	-999	1.6
2007	2	1	32	0.8	0.9	0.9	1	1.1	0.1	0.6	1	-999	0.8
2007	2	2	33	0.5	0.5	0.5	0.6	0	-0.1	0.6	0.5	-999	0.5
2007	2	3	34	0.4	0.5	0.5	0.6	0	-0.1	0.7	0.7	-999	0.4
2007	2	4	35	0.5	0.6	0.6	0.7	0.1	0	0.9	0.8	-999	0.5
2007	2	5	36	0.5	0.5	0.5	0.6	-0.2	0	1	0.8	-999	0.5
2007	2	6	37	0.6	0.7	0.7	0.8	0.2	0.1	0.9	0.8	-999	0.6
2007	2	7	38	1.2	1.4	1.5	1.2	1.7	1.1	1.1	1.4	-999	1.3
2007	2	8	39	1.1	1.4	1.5	1.2	1.7	1.1	1.1	1.5	-999	1.2
2007	2	9	40	1.3	1.6	1.6	1.3	1.9	1.2	1.5	1.4	-999	1.4
2007	2	10	41	1	1.2	1.3	1	0.6	0.7	1.5	0.9	-999	1.1
2007	2	11	42	1.7	1.8	2	1.4	1.9	1.8	1.6	1.7	-999	2
2007	2	12	43	1.3	1.6	1.7	1.4	1.7	1.2	1.8	1.5	-999	1.4
2007	2	13	44	0.8	0.9	0.8	1	0.4	0.3	1.5	1.1	-999	0.8
2007	2	14	45	0.6	0.7	0.6	0.8	0.1	0.1	1.3	1.1	-999	0.6
2007	2	15	46	0.5	0.6	0.6	0.7	0	0.1	1.3	0.8	-999	0.5
2007	2	16	47	1.1	1.3	1.4	1.2	1.1	0.8	1.6	1.4	-999	1.2
2007	2	17	48	1.4	1.6	1.7	1.5	1.8	1.2	1.5	1.6	-999	1.5
2007	2	18	49	1.3	1.5	1.6	1.3	1.3	1.2	1.5	1.4	-999	1.5
2007	2	19	50	1.5	1.9	2	1.5	2.1	1.9	1.7	1.7	-999	1.6
2007	2	20	51	1.5	1.7	1.8	1.7	2	1.5	1.7	2	-999	1.6
2007	2	21	52	1.7	1.9	2	1.9	2.2	1.7	2.1	2	-999	1.8
2007	2	22	53	1.8	2.1	2.2	1.9	2.2	1.9	2.2	1.9	-999	2.1
2007	2	23	54	1.7	1.9	2	1.8	2	1.8	2.2	2	-999	1.8
2007	2	24	55	1.8	2	2.1	1.9	2	1.9	2.3	1.9	-999	2
2007	2	25	56	0.9	1.1	1.1	0.9	0.2	0.6	1.8	0.9	-999	1
2007	2	26	57	0.9	1.2	1.1	1.2	0.7	0.6	1.5	1.2	-999	1
2007	2	27	58	1.1	1.2	1.2	1.2	0.7	0.7	1.8	1.4	-999	1.1
2007	2	28	59	1	1.2	1.2	1.2	0.8	0.6	1.7	1.6	-999	1.1
2007	3	1	60	1.1	1.2	1.2	1.4	0.9	0.5	1.6	1.2	-999	1.1
2007	3	2	61	1.7	2.1	2.3	2	2.4	1.8	1.9	1.9	-999	1.8
2007	3	3	62	1	1.2	1.2	1.1	0.5	0.6	1.8	1.6	-999	1
2007	3	4	63	1.3	1.4	1.4	1.5	1.1	0.9	2.2	1.7	-999	1.3
2007	3	5	64	0.7	0.8	0.8	0.8	-0.1	0.3	1.5	1.5	-999	0.7
2007	3	6	65	2	2.6	2.7	2.1	3.5	2.5	1.8	2	-999	2.2
2007	3	7	66	1.9	2.4	2.5	2	2.8	2	1.7	2.3	-999	2.1
2007	3	8	67	2	2.5	2.7	2.3	3	2.3	2	2.2	-999	2.2
2007	3	9	68	2.6	2.8	3.2	2.3	3.2	3	2.3	2.8	-999	3
2007	3	10	69	2.4	2.9	3.2	2.4	3.6	3.3	2.4	2.7	-999	2.7
2007	3	11	70	2.1	2.5	2.8	2.1	2.5	2.5	2.5	2.2	-999	2.4
2007	3	12	71	2.6	3	3.4	2.5	3.5	3.3	2.6	2.8	-999	2.9
2007	3	13	72	0.9	1	1	1.1	0.4	0.4	1.7	2	-999	0.9
2007	3	14	73	1.1	1.3	1.3	1.4	0.9	0.6	1.6	1.8	-999	1.2
2007	3	15	74	1.8	2.1	2.3	1.9	2.3	1.6	1.4	2.1	-999	1.9
2007	3	16	75	2.3	2.8	3	2.4	3.5	2.4	1.8	2.4	-999	2.5
2007	3	17	76	2.3	2.9	3	2.3	3.8	2.7	1.7	2.3	-999	2.5
2007	3	18	77	2.2	2.6	2.8	2.4	3.1	2.2	1.8	2.5	-999	2.3
2007	3	19	78	1.8	2.1	2.2	2.1	2	1.6	2.2	2.3	-999	2
2007	3	20	79	2.1	2.3	2.5	2.5	2.4	1.6	2.2	2.9	-999	2.2
2007	3	21	80	2.6	2.9	3.3	2.8	3.3	3	2.6	2.7	-999	2.8
2007	3	22	81	3.3	3.5	4	2.8	3.7	3.8	3.1	3.2	-999	3.8
2007	3	23	82	2.5	2.9	3.1	2.3	2.6	2.8	3.3	2.5	-999	2.8
2007	3	24	83	2.3	2.6	2.9	2.5	2.7	2	2.3	2.8	-999	2.5
2007	3	25	84	2.7	2.9	3.4	2.7	3.2	2.9	2.2	2.7	-999	3
2007	3	26	85	2.7	3.1	3.4	2.6	3.3	2.9	2.4	2.8	-999	3
2007	3	27	86	2.5	2.9	3.1	2.4	3.1	2.6	2.3	2.8	-999	2.7
2007	3	28	87	2	2.3	2.4	2.2	2.2	1.8	2	2.7	-999	2.2
2007	3	29	88	2.6	3.1	3.4	2.7	3.5	2.9	2.2	2.8	-999	2.9
2007	3	30	89	2.9	3.4	3.8	3	4.1	3.6	2.5	3.4	-999	3.2
2007	3	31	90	2.6	2.8	3.1	2.4	2.6	2.6	2.7	3	-999	2.9
2007	4	1	91	0.9	1.2	1.1	1.3	0.6	0.7	2.3	2.3	1.4	1
2007	4	2	92	2.4	2.7	3	2.6	2.8	2.4	2.4	2.9	1.2	2.7
2007	4	3	93	2.4	2.8	2.9	2.1	2.5	2.1	1.8	2.4	1.4	2.7
2007	4	4	94	2.5	2.9	3.1	2.5	3	2.4	1.9	2.9	1.2	2.8
2007	4	5	95	2.7	3.1	3.4	2.9	3.4	2.8	2.5	3.3	1.6	2.9
2007	4	6	96	2.4	2.8	3	2.5	2.7	2.4	2.9	3	4.4	2.6
2007	4	7	97	2.4	2.6	2.8	2.4	2.3	2.4	2.9	3.1	1.4	2.7
2007	4	8	98	2.2	2.5	2.6	2.4	2.2	2.2	2.9	2.9	1.2	2.4
2007	4	9	99	2.3	2.5	2.7	2.8	2.5	1.8	2.8	3.3	1.9	2.4
2007	4	10	100	1.9	2.1	2.2	2.2	1.8	1.6	2.7	2.7	1.5	2
2007	4	11	101	2.8	3.3	3.6	3.1	3.8	3.2	2.7	3.6	1	3
2007	4	12	102	2.5	2.8	3	2.7	2.7	2.2	2.9	3.4	2.8	2.7
2007	4	13	103	2.4	2.7	2.9	2.7	2.6	2.3	2.6	3.1	2.2	2.5
2007	4	14	104	2.9	3.4	3.6	2.8	3.4	3	2.8	3.2	1.3	3.3
2007	4	15	105	2.2	2.6	2.8	2.3	2.4	2.3	2.2	2.8	2.2	2.4
2007	4	16	106	3	3.5	3.8	3.2	4.3	3.1	2.1	3.3	1.1	3.2
2007	4	17	107	2.7	2.9	3.2	2.6	2.7	2.7	2.4	3.3	2.7	3
2007	4	18	108	2.1	2.4	2.6	2.6	2.2	1.8	2.5	2.9	3	2.3
2007	4	19	109	2.9	3.3	3.7	3.3	3.7	2.8	2.2	3	2.6	3.1
2007	4	20	110	1.9	2.1	2.2	2.5	1.9	1.1	2.2	2.7	3	1.9
2007	4	21	111	3	3.4	3.8	3.4	3.9	3	2.4	3.7	1.2	3.2
2007	4	22	112	3.2	3.5	4	3.7	3.9	3.2	3.1	3.8	3.4	3.4
2007	4	23	113	2.5	2.9	3.1	2.9	2.7	2.6	3.1	2.9	2.9	2.7
2007	4	24	114	3.2	4	4.1	3.6	5.3	4	2.5	3.3	2.4	3.3
2007	4	25	115	4.1	4.6	5	3.7	5.6	4.8	2.7	3.8	3.2	4.6
2007	4	26	116	3.3	3.8	4.1	3.2	3.9	3.6	3.3	3.7	3	3.7
2007	4	27	117	2.6	2.9	3.1	3	2.7	2.4	3.6	3.1	3.6	2.7
2007	4	28	118	4	4.3	4.9	4.1	4.7	4.8	4.1	4.6	3.2	4.4
2007	4	29	119	3.1	3.5	3.9	3.4	3.6	3.4	3.8	3.9	3.3	3.3
2007	4	30	120	3.4	3.9	4.4	3.8	4.4	3.9	3.3	3.8	3.8	3.6
2007	5	1	121	3.5	4	4.5	3.9	4.5	4.2	3.9	4.6	3.2	3.8
2007	5	2	122	3.8	4.4	4.9	4.2	4.9	4.9	4.7	4.9	3.7	4
2007	5	3	123	4	4.3	4.8	3.9	4.4	4.7	5.2	5.4	4.2	4.4
2007	5	4	124	4.3	4.6	5.3	4.2	4.6	5.2	6	5.1	4.7	4.8
2007	5	5	125	4.9	5.1	5.8	4.3	5	5.5	6	5	4	5.5
2007	5	6	126	4.6	5	5.7	4.6	5	6	7	5.5	5.3	5
2007	5	7	127	4.6	5.1	5.8	4.6	5.2	6.3	7.3	5.7	6.2	5.1
2007	5	8	128	4.4	4.9	5.5	4.6	5.1	6	7.3	5.9	5.9	4.7
2007	5	9	129	2.3	2.7	2.7	2.4	1.8	2.3	5.3	3.7	6.4	2.5
2007	5	10	130	2.2	2.4	2.4	2.3	1.6	2.2	4.8	3.8	2.3	2.3
2007	5	11	131	3.2	3.5	3.8	3.7	3.2	3.3	5.5	4.6	4.1	3.3
2007	5	12	132	2.1	2.4	2.4	2.5	1.8	2.2	5.1	3.5	3.8	2.3
2007	5	13	133	3.1	3.4	3.7	3.3	3	3.1	4.9	4.2	2.1	3.4
2007	5	14	134	3.4	3.8	4.2	3.5	3.5	4	5.1	5	1.6	3.7
2007	5	15	135	4.1	5	5.3	4.4	5.9	6.2	5.8	5.3	3.9	4.4
2007	5	16	136	3.7	4.1	4.6	3.8	4.1	4.8	5.4	5.2	3.6	4
2007	5	17	137	2.6	2.9	3	3.1	2.4	2.7	5.6	4.9	4.2	2.7
2007	5	18	138	3.9	4.2	4.8	3.6	3.9	4.7	5.3	4.4	3.4	4.4
2007	5	19	139	3.7	4	4.5	3.9	3.8	4.4	5.6	4.9	2.7	4.1
2007	5	20	140	4.7	5.1	5.9	4.8	5.1	5.7	6.5	5.5	2.6	5.2
2007	5	21	141	4.7	5.1	5.9	4.8	5.7	5.8	5.6	5.6	3.6	5.2
2007	5	22	142	4.9	5.1	6	4.8	5.6	6.4	5.6	6.7	5.2	5.4
2007	5	23	143	4.2	4.9	5	4	4.9	5.4	6.8	5.9	3.4	4.6
2007	5	24	144	5.4	5.5	6.5	5	6.1	7	6.1	6.8	5	6
2007	5	25	145	5.2	5.8	6.2	4.7	6	7.3	8	6.8	4.7	5.8
2007	5	26	146	4.4	5.1	5.4	4.5	5.4	5.8	6.8	6.9	5	4.8
2007	5	27	147	4.5	5	5.5	4.7	5.3	5.2	6.2	6	5.3	4.8
2007	5	28	148	4.7	5.1	5.8	4.7	5.3	5.3	5.5	5.6	5.2	5.2
2007	5	29	149	5	5.2	6	4.5	5.2	5.7	5.8	5.6	4	5.7
2007	5	30	150	5.1	5.2	6	4.5	5.1	6.5	7.1	6.7	5.1	5.8
2007	5	31	151	4.9	5.4	5.9	4.8	5.7	6.1	6.6	6.1	4.5	5.4
2007	6	1	152	4.6	4.9	5.6	4.8	5.1	5.6	6.1	6.1	5.4	4.9
2007	6	2	153	5.1	5.3	6.3	5	5.8	6.7	6	6.3	5.2	5.7
2007	6	3	154	5	5.4	6	4.9	6	6.4	6.3	6.8	5	5.4
2007	6	4	155	4.5	4.9	5.3	4.8	5.1	4.9	6.7	6.6	5.4	4.8
2007	6	5	156	5.4	5.9	6.4	4.8	6.5	7.6	7	7.1	4.6	6.1
2007	6	6	157	6.4	6.5	7.4	5	6.5	8	8	6.5	5.5	7.4
2007	6	7	158	4.5	5.1	5.6	5	5.7	5	6	5	7.4	4.8
2007	6	8	159	4	4.5	5.1	4.8	4.8	4.7	5.5	5.2	4.5	4.1
2007	6	9	160	4	4.4	4.9	4.7	4.6	4.6	5.7	5.5	5.6	4.1
2007	6	10	161	4.3	4.9	5.5	4.8	5.3	5.8	6.5	6	5.2	4.5
2007	6	11	162	4.3	4.8	5.4	4.8	5	5	6.3	4.9	4.4	4.6
2007	6	12	163	4.9	5.2	6.1	4.9	5.4	5.7	6	5.7	4.8	5.5
2007	6	13	164	5.7	5.9	6.9	5.2	6.3	7.1	6.6	6.4	5.5	6.4
2007	6	14	165	5.4	5.7	6.8	5.3	6.2	7.6	7.2	6.8	5.6	6
2007	6	15	166	5.2	5.9	6.5	5.3	6.6	7.8	7.7	7.3	5.4	5.7
2007	6	16	167	5.2	5.8	6.2	5.1	6.6	6.8	7.2	6.8	5.8	5.6
2007	6	17	168	5.5	6.1	6.7	5.1	6.9	8	7.3	6.2	6.6	6.1
2007	6	18	169	6.4	6.5	7.2	5	6.8	8	7.3	6.7	5.4	7.4
2007	6	19	170	7.3	7.2	8	4.9	7	8.8	7.5	6.5	5.1	8.7
2007	6	20	171	5.9	6.3	6.9	5	6.7	7.6	7.1	6.4	5.5	6.7
2007	6	21	172	5.8	6.4	6.7	5	7	7.6	7.3	6.2	5.9	6.6
2007	6	22	173	5.3	6.2	6.4	4.8	7.1	8.3	7.6	6.6	5.9	5.9
2007	6	23	174	5.2	6.1	6.4	4.9	6.8	8.3	8.4	6.9	5.4	5.7
2007	6	24	175	5.7	6.6	6.6	4.9	7.1	8.8	9.6	7.2	6.3	6.4
2007	6	25	176	5.1	6.2	6.3	5.1	6.7	8.1	9.7	6.6	6.4	5.6
2007	6	26	177	5.3	6.2	6.4	4.9	6.9	8	8.4	6.7	7.2	5.9
2007	6	27	178	6.2	6.7	7.1	5	7.2	9.2	9	7.4	6.7	7.1
2007	6	28	179	6.9	7.2	7.5	4.9	7.4	9.6	9.6	7.2	8.2	8.1
2007	6	29	180	7.4	7.3	7.6	4.6	6.6	9.3	9.8	7.1	7.1	8.7
2007	6	30	181	5.4	6	6.4	4.8	6.2	7.3	7.8	6.2	6.1	6
2007	7	1	182	5.9	6.3	6.9	4.9	6.8	8.3	7.6	6.7	7.2	6.7
2007	7	2	183	5.1	5.7	6.1	4.7	5.8	6.6	7.5	6.1	5.3	5.7
2007	7	3	184	4.8	5.6	5.9	5	6.2	6.7	7.7	6.7	5.9	5.2
2007	7	4	185	6	6.5	7.1	5.1	7	8.6	8.2	6.5	5.9	6.8
2007	7	5	186	6	6.2	7.1	5.1	6.4	8.1	7.7	6.7	6.2	6.8
2007	7	6	187	5.4	6	6.6	5	6.6	8.2	8.1	7	7.1	6
2007	7	7	188	4.7	5.3	5.8	5.2	5.8	6.2	7.6	6.5	6.8	4.9
2007	7	8	189	5.4	6.4	6.4	4.8	7.5	8.7	8.2	7.1	6.3	6.1
2007	7	9	190	6.2	6.9	7	4.8	7.6	9.5	9.1	7.6	6.7	7.1
2007	7	10	191	5.9	6.7	7	5	7.4	9.3	9.1	7.3	7.2	6.7
2007	7	11	192	5.5	6.2	6.7	5.1	6.9	8.6	8.6	7.3	7.8	6.1
2007	7	12	193	5.3	6.1	6.4	4.9	6.8	7.9	7.9	7	7.3	5.9
2007	7	13	194	5.1	5.9	6.2	5.1	6.5	7.1	7.9	6.3	8.2	5.5
2007	7	14	195	4.9	5.3	6.1	5.2	5.5	6	7.2	6.1	8.5	5.3
2007	7	15	196	5.4	5.9	6.5	5.2	6.3	6.9	7.7	6	7.4	6
2007	7	16	197	5.3	6.1	6.2	4.6	6.8	7.6	7.3	5.9	7.2	6
2007	7	17	198	4.7	5.8	5.8	4.6	6.8	7.2	6.9	6	6.3	5.2
2007	7	18	199	4.8	5.9	5.9	4.6	6.7	7.7	7.9	6.5	6.8	5.3
2007	7	19	200	5	6.1	6.1	4.5	6.7	7.9	8.6	6.5	7.2	5.6
2007	7	20	201	4.8	5.8	5.9	4.3	5.8	7.5	9.3	6.8	7.2	5.4
2007	7	21	202	5	5.9	5.9	5	6.5	6.9	8.5	6.7	8	5.4
2007	7	22	203	5.4	6.1	6.6	5.1	6.8	8.3	8.5	7.1	7.5	6
2007	7	23	204	7.1	7	7.2	4.4	6.4	8.9	9.1	7.7	6.8	8.5
2007	7	24	205	7.7	7.3	7.4	4.1	6	8.9	9.4	7.6	7.1	9.3
2007	7	25	206	6	6.2	6.5	4	5.2	8	10.1	7.2	7.4	7.1
2007	7	26	207	7.3	7.4	7.7	4.7	7	10	10.5	7.3	7.3	8.6
2007	7	27	208	5.8	6.3	6.6	4.5	6.1	8.5	10.1	7.8	7.6	6.6
2007	7	28	209	6.4	6.7	6.9	4.5	6.4	8.8	10	7.7	7.5	7.4
2007	7	29	210	7.2	7.4	7.4	4.4	6.8	9.7	10.5	6.9	7.3	8.5
2007	7	30	211	6.2	6.6	7	4.5	6.1	9.3	11	7.1	7.1	7.1
2007	7	31	212	5.5	6	6.1	3.8	4.9	7.6	10.6	7.2	7.1	6.4
2007	8	1	213	5	5.9	6.1	4.5	6.2	7.8	8.9	7.3	7.2	5.5
2007	8	2	214	5.1	5.6	6.3	4.9	5.8	7.2	8.3	6	7.5	5.6
2007	8	3	215	5.8	6.2	6.9	5	6.4	8.1	8.6	6.5	6.2	6.6
2007	8	4	216	5.7	6.2	6.9	5.1	6.8	8.5	8.3	6.4	6.1	6.4
2007	8	5	217	5.7	6	6.9	5.1	6.3	7.9	8.1	6.2	6.8	6.4
2007	8	6	218	5.3	5.5	6.4	5	5.5	6.4	7.5	5.7	6.1	5.9
2007	8	7	219	5.2	5.4	6.3	4.9	5.4	6.2	7.1	5.6	6.2	5.8
2007	8	8	220	5.1	5.3	6.1	4.8	5.3	6.2	6.9	6.1	7.2	5.7
2007	8	9	221	5.3	5.6	6.4	4.8	5.8	7.1	7.3	6.1	7	5.9
2007	8	10	222	5.2	5.6	6.3	4.8	6.1	7.3	7.5	6.5	6.8	5.8
2007	8	11	223	6.2	6.3	7	4.8	6.7	8.4	7.9	6.9	6.4	7.1
2007	8	12	224	5.2	5.6	6.3	4.7	5.9	7.3	7.5	6.2	7.3	5.8
2007	8	13	225	4.6	5	5.7	5.1	5.1	6	7	5.8	7.8	5
2007	8	14	226	5.4	5.6	6.5	4.7	5.6	7.3	7.4	6	7.4	6.1
2007	8	15	227	5.5	5.4	6.4	4.8	5.3	7.2	7.5	6.4	7.7	6.3
2007	8	16	228	5	5.1	5.9	5.1	5.1	6.2	7.7	6.5	8.1	5.5
2007	8	17	229	5.1	5.3	6	4.7	5.1	6.3	7.8	6.4	7.7	5.8
2007	8	18	230	5	5.2	6.1	5.1	5.2	6.4	7.7	5.6	8.6	5.5
2007	8	19	231	4.4	4.8	5.4	5	4.8	5.3	7.3	5.7	8.3	4.7
2007	8	20	232	3.5	3.7	4	4.3	3.3	3.3	7.1	5.4	7.1	3.6
2007	8	21	233	4.6	4.8	5.5	4.7	4.9	6.2	7.4	6.5	5.5	5
2007	8	22	234	4.4	4.6	5.2	4.4	4.3	5.8	7.9	6.6	5.5	4.9
2007	8	23	235	4.6	5.1	5.6	4.6	5.3	6	7.5	6.2	5.2	5
2007	8	24	236	4.6	5	5.6	4.6	5	5.8	7.7	5.4	6.3	5
2007	8	25	237	4.1	4.4	4.8	4.5	4.3	4.9	6.8	6	6.8	4.3
2007	8	26	238	4.4	4.5	5.1	4.5	4.4	5.4	7	5.8	6.1	4.8
2007	8	27	239	4.4	4.6	5.2	4.7	4.5	5.3	7.1	5.6	6.1	4.8
2007	8	28	240	4.2	4.4	4.9	4.6	4.2	4.9	7.2	5.5	5.7	4.4
2007	8	29	241	4.2	4.4	5	4.5	4.4	5.3	7.2	5.9	5.7	4.4
2007	8	30	242	4	4.3	4.8	4.5	4.2	5	7.3	6.1	6.3	4.3
2007	8	31	243	4.3	4.7	5.2	4.7	4.6	5.5	7.6	6.2	6.7	4.6
2007	9	1	244	4.4	4.8	5.2	3.9	4.7	5.9	7.6	6.5	5	4.9
2007	9	2	245	4.5	4.9	5.4	4.1	4.9	6.3	7.7	7	6.6	5
2007	9	3	246	4.4	4.9	5.3	4.2	5	5.9	7.4	5.8	5.7	4.9
2007	9	4	247	4.3	4.5	5.1	4.2	4.5	5.5	6.9	6.1	7	4.7
2007	9	5	248	4.2	4.4	4.9	4.1	4.2	5.3	7.1	5.8	6.8	4.5
2007	9	6	249	3.9	4.2	4.6	4.1	4.1	5.1	6.6	5.5	5.6	4.3
2007	9	7	250	4.2	4.4	5	4.3	4.3	5.2	7	5.3	7.8	4.5
2007	9	8	251	3.4	3.7	4	4.1	3.6	3.4	5.6	4.1	8.3	3.5
2007	9	9	252	3.2	3.5	3.8	4	3.4	3.2	5.3	3.9	5.9	3.3
2007	9	10	253	3.4	3.6	4	3.9	3.7	3.7	5	4.8	7.6	3.5
2007	9	11	254	3.4	3.7	4	3.9	3.6	3.8	5.7	5.1	4.1	3.6
2007	9	12	255	3.3	3.6	3.9	3.9	3.7	3.7	5.3	5.1	7	3.5
2007	9	13	256	4.1	4.3	5	3.8	4.7	6	5.3	4.8	3.6	4.5
2007	9	14	257	4	4.7	4.9	3.4	5.1	6	6	4.8	5.6	4.5
2007	9	15	258	3.8	4.6	4.8	3.2	4.9	6.1	6.2	4.9	3.2	4.3
2007	9	16	259	3.6	4.4	4.5	2.9	5	5.9	5.1	5.4	4.9	4.1
2007	9	17	260	4	4.8	4.9	2.9	5	6.5	5.9	4.6	4.1	4.7
2007	9	18	261	4.3	5	5.1	2.9	5.4	6.8	6.1	4.9	4.8	5.1
2007	9	19	262	4.6	5	5.3	3.1	5	6.6	6	4.8	4	5.5
2007	9	20	263	3.5	4.4	4.6	3.3	5	6.2	6	4.9	5.6	3.8
2007	9	21	264	3.3	4.1	4.3	3	4.1	5.4	6.2	5.4	3.4	3.7
2007	9	22	265	3.2	4	4.3	3.2	4.3	5.5	6.3	4.6	5.3	3.4
2007	9	23	266	3.2	3.6	4	3.1	3.6	4.6	5.6	4.8	4.2	3.5
2007	9	24	267	2.7	2.9	3.1	2.9	2.6	3.4	5.9	5.3	6.2	2.9
2007	9	25	268	2.8	3.4	3.7	3.2	3.7	4.3	4.9	3.9	2.7	3
2007	9	26	269	3	3.5	3.8	3.1	3.7	4.5	5	4.2	4.3	3.2
2007	9	27	270	3.5	3.8	4.3	3.2	4	5.4	5.7	4.4	3.7	3.9
2007	9	28	271	3.9	4.4	4.7	3	4.5	6.1	6.2	4.8	4.2	4.5
2007	9	29	272	3.1	4.1	4.2	2.6	4.3	5.8	6.3	4.6	5	3.5
2007	9	30	273	3.4	4	4.3	3	4.2	5.5	5.8	4.5	4.9	3.8
2007	10	1	274	3.2	3.7	4	2.8	3.6	4.6	5.7	4.2	5.1	3.6
2007	10	2	275	2.8	3.3	3.5	2.5	2.9	4	5.8	4.2	4.6	3.1
2007	10	3	276	3	3.5	3.7	2.5	3	4.4	6.2	3.8	4	3.3
2007	10	4	277	2.5	3.1	3.2	2.3	2.6	3.7	5.9	3.5	4.1	2.7
2007	10	5	278	2.1	2.4	2.4	2.2	2	2.7	4.5	3.3	4.6	2.2
2007	10	6	279	2.4	2.7	2.8	2.7	2.7	2.9	4.3	3.3	2.9	2.5
2007	10	7	280	2.8	3.1	3.5	2.8	3.3	4.2	4.8	3.6	4.4	3.1
2007	10	8	281	2.8	3.1	3.4	2.7	3.1	4.2	5	3.7	3.3	3
2007	10	9	282	2.4	2.9	3.1	2.4	2.7	3.7	5.2	3.6	3.2	2.5
2007	10	10	283	2.3	2.9	3	2.6	2.8	3.6	5.5	3.1	4.9	2.5
2007	10	11	284	2	2.5	2.6	2.3	2.3	3	4.8	3.4	5.5	2.1
2007	10	12	285	2.4	2.8	3	2.5	2.7	3.8	5.1	3.3	3.3	2.5
2007	10	13	286	2.1	2.5	2.6	2.3	2.3	3	4.8	3.2	3.4	2.2
2007	10	14	287	2.2	2.5	2.6	2.6	2.6	2.8	4.2	2.8	4.1	2.3
2007	10	15	288	2.1	2.3	2.4	2.1	2.1	2.6	3.8	2.8	3.4	2.3
2007	10	16	289	2.2	2.5	2.8	2.2	2.8	3.2	3.4	2.4	2.7	2.4
2007	10	17	290	2.2	3	3	1.8	3.6	3.8	3	2.9	3.6	2.5
2007	10	18	291	2.1	2.9	3.1	2	3.5	4.1	3.4	2.7	3.3	2.4
2007	10	19	292	1.8	2.7	2.7	1.8	2.8	3.5	3.8	2.8	4.8	1.9
2007	10	20	293	1.7	1.9	1.9	1.9	1.7	1.9	3.4	2.3	5.6	1.7
2007	10	21	294	2.1	2.4	2.5	2	2.2	2.9	4	2.6	0.2	2.4
2007	10	22	295	2.2	2.6	2.8	2.1	2.8	3.9	4	3	2.1	2.4
2007	10	23	296	1.8	2.7	2.8	1.9	2.7	3.9	4.4	3.2	0.3	2
2007	10	24	297	1.9	2.7	2.8	2	2.7	3.9	4.8	3.1	2.6	2
2007	10	25	298	1.5	2.1	2.1	1.3	1	2.2	4.2	2.8	2.6	1.6
2007	10	26	299	1.8	2.5	2.6	1.8	2.7	3.5	3.7	2.9	2	2
2007	10	27	300	2	2.8	2.9	1.7	3.2	4.1	3.8	2.6	2.9	2.2
2007	10	28	301	1.8	2.6	2.6	1.7	3	3.6	3.5	2.5	2.9	2
2007	10	29	302	1.9	2.4	2.5	1.6	2.5	2.9	3	2.6	2.5	2.1
2007	10	30	303	1	1.1	1.1	1.2	0.8	0.8	2.5	1.8	3.5	1
2007	10	31	304	1.5	2	2.1	1.6	2.3	2.8	2.7	2.5	1.9	1.6
2007	11	1	305	1.5	2.2	2.2	1.4	2.2	2.7	3	2.4	-999	1.7
2007	11	2	306	1.6	2.2	2.3	1.6	2.3	3	3.4	2.4	-999	1.7
2007	11	3	307	1.7	2.2	2.3	1.7	2.5	3.2	3.3	2.3	-999	1.9
2007	11	4	308	1.6	2.1	2.2	1.4	2.2	2.6	2.9	2.4	-999	1.8
2007	11	5	309	1.3	1.5	1.6	1.4	1.4	1.6	2.5	2	-999	1.4
2007	11	6	310	1.5	1.9	1.9	1.4	1.6	2.4	3.2	2.1	-999	1.7
2007	11	7	311	1.4	1.6	1.7	1.4	1.5	1.8	2.8	1.6	-999	1.5
2007	11	8	312	1.2	1.5	1.5	1.5	1.6	1.5	2.6	1.5	-999	1.3
2007	11	9	313	1.1	1.2	1.2	1.3	1	1	2.5	1.7	-999	1.1
2007	11	10	314	1.5	1.6	1.8	1.2	1.5	1.8	2.2	1.6	-999	1.7
2007	11	11	315	1.3	1.4	1.5	1.1	1	1.4	2.2	1.6	-999	1.5
2007	11	12	316	1.5	1.9	2	1.1	2.1	2.4	1.9	1.8	-999	1.7
2007	11	13	317	1.2	1.5	1.5	1.1	1.4	1.7	1.9	1.5	-999	1.3
2007	11	14	318	1	1.3	1.3	1	1.1	1.2	2.1	1.5	-999	1
2007	11	15	319	1.1	1.4	1.4	1.1	1.2	1.6	2.4	1.7	-999	1.2
2007	11	16	320	1.1	1.4	1.4	1.1	1.2	1.7	2.6	1.7	-999	1.1
2007	11	17	321	1.1	1.6	1.6	1.2	1.6	2.2	2.8	1.8	-999	1.2
2007	11	18	322	1.3	1.7	1.8	1.2	1.7	2.4	2.7	1.9	-999	1.5
2007	11	19	323	0.7	0.9	0.9	0.8	0.2	0.6	2.1	1.1	-999	0.8
2007	11	20	324	0.7	1	1	0.7	0.1	0.4	1.7	1.1	-999	0.7
2007	11	21	325	0.8	1.1	1.1	0.7	0.3	0.4	1.4	0.8	-999	0.8
2007	11	22	326	1	1.4	1.4	0.8	0.7	0.9	1.6	1.2	-999	1.1
2007	11	23	327	1	1.7	1.7	0.7	1.9	2.1	1.6	1.3	-999	1.2
2007	11	24	328	1.5	1.9	2	0.7	1.8	2.2	1.5	1.4	-999	1.9
2007	11	25	329	1.4	1.7	1.8	0.7	1.6	1.8	1.4	1.4	-999	1.7
2007	11	26	330	1	1.6	1.6	0.7	1.7	1.8	1.5	1.4	-999	1.1
2007	11	27	331	1	1.5	1.6	0.7	1.4	1.7	1.5	1.5	-999	1.1
2007	11	28	332	1	1.3	1.3	0.8	0.5	0.7	1.7	1.3	-999	1.2
2007	11	29	333	1.1	1.6	1.7	0.7	0.8	1.2	1.4	1.2	-999	1.3
2007	11	30	334	0.9	1.3	1.4	0.7	0.8	0.9	1.1	1.1	-999	1
2007	12	1	335	0.9	1.5	1.5	0.6	1.4	1.4	1.4	1.1	-999	1
2007	12	2	336	1.3	1.7	1.8	0.7	1.5	1.9	1.7	1.4	-999	1.5
2007	12	3	337	1.4	1.6	1.7	0.6	1.3	1.4	1.2	1.3	-999	1.7
2007	12	4	338	0.7	1.1	1.1	0.6	0.1	0.3	0.9	0.9	-999	0.8
2007	12	5	339	0.6	0.8	0.8	0.6	0	0.2	1.1	0.6	-999	0.7
2007	12	6	340	0.8	1.1	1.1	0.6	0	0.3	1.1	1	-999	1
2007	12	7	341	0.7	0.9	0.9	0.7	0.3	0.2	1.2	0.8	-999	0.7
2007	12	8	342	0.8	1.1	1.2	0.6	0.8	0.8	1.1	1.1	-999	1
2007	12	9	343	0.9	1.1	1.2	0.7	0.3	0.6	1.3	0.9	-999	1.1
2007	12	10	344	0.8	1	1	0.6	-0.1	0.1	1.2	0.5	-999	0.9
2007	12	11	345	0.8	1.1	1.2	0.7	0	0.3	1.5	0.9	-999	0.9
2007	12	12	346	0.9	1.1	1.1	0.7	0.4	0.6	1.7	0.9	-999	1
2007	12	13	347	0.9	1.1	1.2	0.7	0.4	0.5	1.4	0.7	-999	1
2007	12	14	348	0.8	1	1.1	0.7	0.6	0.6	1.4	0.9	-999	0.9
2007	12	15	349	0.8	1	1	0.7	0.7	0.8	1.4	1	-999	0.9
2007	12	16	350	0.8	1.1	1.1	0.6	0.1	0.3	1.2	0.5	-999	1
2007	12	17	351	1	1.5	1.5	0.5	1.4	1.5	1.2	1.1	-999	1.2
2007	12	18	352	1.1	1.4	1.5	0.5	0.9	1	1	1	-999	1.4
2007	12	19	353	1	1.5	1.5	0.4	1.3	1	0.7	0.8	-999	1.3
2007	12	20	354	1.2	1.4	1.5	0.4	1.1	0.9	0.6	0.8	-999	1.6
2007	12	21	355	1.3	1.5	1.7	0.4	1.2	1.2	0.8	0.9	-999	1.7
2007	12	22	356	0.9	1.3	1.3	0.5	1.3	1	0.8	1.1	-999	1.1
2007	12	23	357	0.9	1.3	1.3	0.5	1	1	0.9	0.7	-999	1.1
2007	12	24	358	0.9	1.3	1.4	0.5	1	1.1	1	1.2	-999	1
2007	12	25	359	0.9	1.3	1.3	0.5	1.1	1.1	1	1.2	-999	1
2007	12	26	360	1	1.4	1.5	0.5	1.3	1.3	1.1	1.1	-999	1.2
2007	12	27	361	0.9	1.4	1.5	0.5	1.4	1.4	1.1	1.1	-999	1.1
2007	12	28	362	1	1.4	1.5	0.5	1.3	1.3	1.1	1.1	-999	1.2
2007	12	29	363	0.8	1.3	1.4	0.5	1.3	1.3	1	1.1	-999	1
2007	12	30	364	1.3	1.6	1.7	0.4	1.4	1.2	0.8	1	-999	1.6
2007	12	31	365	1.1	1.4	1.5	0.5	1.4	1.1	0.9	1	-999	1.4
2008	1	1	1	0.6	0.9	0.9	0.6	0.8	0.3	0.8	0.8	-999	0.6
2008	1	2	2	0.6	0.8	0.8	0.6	0.6	0.3	1	0.9	-999	0.6
2008	1	3	3	0.8	0.8	0.9	0.6	0.5	0.4	1	1	-999	0.9
2008	1	4	4	0.6	0.8	0.8	0.6	0.1	0.1	0.9	0.5	-999	0.7
2008	1	5	5	0.6	0.8	0.8	0.6	0.9	0.1	0.6	0.8	-999	0.7
2008	1	6	6	0.6	0.7	0.7	0.7	1	0.2	0.9	1.1	-999	0.7
2008	1	7	7	0.7	1.1	1.1	0.6	1.2	0.7	0.8	1.1	-999	0.8
2008	1	8	8	0.7	0.9	0.9	0.6	0.5	0.2	0.6	0.7	-999	0.7
2008	1	9	9	0.6	0.7	0.8	0.6	0.8	0	0.5	0.9	-999	0.7
2008	1	10	10	0.7	0.9	0.9	0.6	0.7	0.2	0.5	0.7	-999	0.8
2008	1	11	11	0.9	1.2	1.3	0.6	1.4	0.6	0.7	1	-999	1.1
2008	1	12	12	0.8	1	1.1	0.6	1.2	0.5	0.6	0.9	-999	0.9
2008	1	13	13	0.7	0.9	1	0.6	1.2	0.3	0.6	0.9	-999	0.7
2008	1	14	14	0.8	1	1.1	0.7	1.3	0.5	0.7	1.1	-999	0.9
2008	1	15	15	1.2	1.3	1.4	0.7	1.4	0.8	0.8	1.3	-999	1.5
2008	1	16	16	0.9	1	1.1	0.6	0.3	0.1	0.6	0.7	-999	1
2008	1	17	17	1.1	1.2	1.3	0.7	1.2	0.8	0.8	1.1	-999	1.3
2008	1	18	18	1	1.2	1.3	0.8	1.6	0.9	1	1.1	-999	1.2
2008	1	19	19	0.9	1.2	1.2	0.8	1.4	0.8	1.1	1.2	-999	1
2008	1	20	20	0.9	1.1	1.1	0.9	1.4	0.9	1.2	1.2	-999	0.9
2008	1	21	21	0.9	1	1.1	1	1.3	0.6	1.1	1.4	-999	1
2008	1	22	22	1.2	1.3	1.4	0.9	1.3	0.9	1	1.3	-999	1.4
2008	1	23	23	1.1	1.3	1.4	0.8	1.1	0.8	1.2	1.4	-999	1.2
2008	1	24	24	2	2	2.2	0.9	1.8	1.8	1.5	1.6	-999	2.5
2008	1	25	25	1.1	1.3	1.4	1	1.5	1	1.3	1.3	-999	1.2
2008	1	26	26	1.1	1.4	1.4	0.9	1.4	1	1.4	1.2	-999	1.2
2008	1	27	27	1	1.3	1.4	0.9	1.6	1	1.1	1.4	-999	1.1
2008	1	28	28	0.7	1	1	0.7	0.5	0.3	0.8	0.8	-999	0.8
2008	1	29	29	0.8	1.2	1.2	0.7	-0.1	0.2	1	0.7	-999	0.9
2008	1	30	30	1.2	1.4	1.5	0.9	1.6	0.8	0.8	0.9	-999	1.4
2008	1	31	31	1.1	1.4	1.5	0.9	1.6	0.7	0.7	1.1	-999	1.2
2008	2	1	32	1.2	1.5	1.6	1	1.8	0.9	0.9	1.3	-999	1.4
2008	2	2	33	1	1.3	1.4	1	1.7	0.8	1	1	-999	1.1
2008	2	3	34	1.3	1.6	1.7	1.1	1.9	1.2	1.1	1.6	-999	1.5
2008	2	4	35	1.6	1.9	2	1.1	2.2	1.5	1.2	1.5	-999	1.9
2008	2	5	36	1.3	1.7	1.7	1.2	2.1	1.4	1.2	1.3	-999	1.4
2008	2	6	37	1.3	1.7	1.8	1.3	2.2	1.2	1.3	1.4	-999	1.5
2008	2	7	38	1.3	1.7	1.8	1.2	2.1	1.4	1.3	1.5	-999	1.4
2008	2	8	39	1.5	1.8	1.9	1.1	1.6	1.3	1.4	1.3	-999	1.8
2008	2	9	40	1.9	2.1	2.2	1.1	1.7	1.5	1.5	1.5	-999	2.4
2008	2	10	41	1.5	1.8	1.9	1.4	2	1.6	1.8	1.7	-999	1.7
2008	2	11	42	1	1.2	1.2	1.1	0.8	0.7	1.7	1.4	-999	1.1
2008	2	12	43	1.2	1.4	1.5	1.3	1.3	0.9	1.6	1.4	-999	1.3
2008	2	13	44	1.2	1.5	1.5	1.2	1.3	0.9	1.4	1.2	-999	1.3
2008	2	14	45	1	1.3	1.3	1	0.8	0.6	1.1	1.2	-999	1.1
2008	2	15	46	1.4	1.7	1.8	1.4	2.1	1	1	1.1	-999	1.6
2008	2	16	47	1	1.3	1.3	0.8	0.3	0.3	0.8	0.8	-999	1.1
2008	2	17	48	0.9	1.3	1.3	0.8	0.2	0.4	1	1	-999	1
2008	2	18	49	1.2	1.6	1.6	1	0.7	0.7	1.2	1.3	-999	1.4
2008	2	19	50	1.4	1.7	1.7	1.2	1.8	0.8	0.7	0.7	-999	1.5
2008	2	20	51	1.6	2	2.1	1.4	2.4	1.2	0.9	1.5	-999	1.9
2008	2	21	52	1.5	1.8	1.9	1.5	2.1	1	1.1	1.7	-999	1.6
2008	2	22	53	1.6	2	2	1.6	2.4	1.4	1.4	1.9	-999	1.7
2008	2	23	54	1.7	2.1	2.3	1.8	2.7	1.7	1.6	1.9	-999	1.9
2008	2	24	55	1	1.3	1.3	1.2	0.8	0.8	1.6	1.3	-999	1.1
2008	2	25	56	1.2	1.4	1.4	1.4	1.1	0.8	1.8	1.7	-999	1.2
2008	2	26	57	1.4	1.6	1.7	1.5	1.4	1.3	1.8	2.1	-999	1.5
2008	2	27	58	2.1	2.5	2.6	2	3	2.1	1.9	2.6	-999	2.4
2008	2	28	59	2.1	2.5	2.6	1.8	2.6	2	2.1	2.3	-999	2.4
2008	2	29	60	2.8	3.1	3.3	1.9	2.9	2.8	2.5	2.1	-999	3.3
2008	3	1	60	2	2.6	2.6	1.9	2.8	2.4	2.5	2	-999	2.2
2008	3	2	61	2.2	2.6	2.8	2	2.9	2.4	2.4	2.2	-999	2.4
2008	3	3	62	2.4	2.8	2.9	1.9	2.8	2.3	2.1	1.8	-999	2.7
2008	3	4	63	2.4	2.8	2.9	2.1	3.3	2.5	2.2	2.6	-999	2.6
2008	3	5	64	2	2.6	2.6	2.1	3	2.4	2.4	2.5	-999	2.1
2008	3	6	65	2.7	3.2	3.4	2.2	3.6	3.5	3	2.5	-999	3.1
2008	3	7	66	2.4	3.1	3.2	2.3	3.6	3.4	3.4	2.7	-999	2.7
2008	3	8	67	3.7	3.9	4.2	2.4	3.8	4.1	3.5	2.6	-999	4.4
2008	3	9	68	2.8	3.1	3.2	1.7	1.8	2.6	3.5	2.2	-999	3.3
2008	3	10	69	1.9	2.4	2.4	1.6	1.4	1.8	3.3	2.5	-999	2.2
2008	3	11	70	2.4	2.8	3	2.5	3.1	2.4	2.6	2.8	-999	2.7
2008	3	12	71	2.1	2.5	2.7	2.2	2.8	2.4	2.3	2.4	-999	2.2
2008	3	13	72	1.8	2.3	2.3	1.9	2	1.8	2.5	2.3	-999	2
2008	3	14	73	1.1	1.5	1.5	1.1	0.6	0.8	1.6	1.4	-999	1.2
2008	3	15	74	2.2	2.6	2.8	2.4	3.2	2	1.8	2.2	-999	2.4
2008	3	16	75	2.4	2.7	3	2.4	3.2	2.2	1.9	2.8	-999	2.6
2008	3	17	76	2.2	2.6	2.7	2.2	2.9	2	2	2.8	-999	2.4
2008	3	18	77	2.3	2.6	2.8	2.5	2.6	2.2	2.6	2.6	-999	2.6
2008	3	19	78	2.6	2.9	3.2	2.8	3.1	2.6	2.8	2.9	-999	2.8
2008	3	20	79	2.3	2.6	2.8	2.6	2.7	2.2	2.5	2.8	-999	2.5
2008	3	21	80	2.2	2.4	2.6	2.2	2.1	2.2	3	3	-999	2.4
2008	3	22	81	2.5	2.8	2.9	2.3	2.5	2.5	3.3	3.1	-999	2.8
2008	3	23	82	2.9	3.1	3.3	2.9	2.9	2.8	4	4.2	-999	3.2
2008	3	24	83	3.2	3.6	3.9	3.6	3.7	3.6	5	4	-999	3.4
2008	3	25	84	2.7	3	3.3	3.3	3.2	2.6	3.9	3.4	-999	2.8
2008	3	26	85	2.5	2.8	3.1	3.1	3.1	2	2.5	2.8	-999	2.6
2008	3	27	86	2.5	2.8	3.1	2.9	3	2.3	2.8	3.4	-999	2.6
2008	3	28	87	2.1	2.4	2.6	2.5	2.4	1.7	2.6	2.9	-999	2.2
2008	3	29	88	2.1	2.4	2.5	2.3	2.1	1.8	3.3	3.2	-999	2.2
2008	3	30	89	1.7	1.9	1.9	1.9	1.3	1.5	3.1	3.4	-999	1.8
2008	3	31	90	1.8	2.1	2.1	2.1	1.7	1.4	2.5	2.5	1	1.9
2008	4	1	91	2.3	2.6	2.9	2.6	2.8	1.9	2.1	2.6	1	2.5
2008	4	2	92	2.4	2.7	3	2.6	2.8	2	2.2	3.1	1.1	2.6
2008	4	3	93	2.8	3.1	3.5	3.2	3.5	2.4	2.7	3.5	2.4	3
2008	4	4	94	2.4	2.7	2.9	2.9	2.8	1.9	2.5	2.7	2.9	2.5
2008	4	5	95	2.3	2.7	2.8	2.6	2.6	2	2.6	3.1	2.2	2.4
2008	4	6	96	1.9	2.2	2.3	2	1.6	1.8	3.4	3.3	2.2	2
2008	4	7	97	2.7	3.2	3.4	2.8	3.2	2.5	3	3.2	3.2	3
2008	4	8	98	2.6	3	3.2	2.9	3.2	2.3	2.6	3.2	2.2	2.7
2008	4	9	99	2.8	3.3	3.5	3.1	3.6	2.8	3	3.3	2.3	3
2008	4	10	100	2.5	3	3.1	2.4	2.8	2.5	2.9	3.1	3	2.7
2008	4	11	101	3.2	3.9	4.1	3.5	4.4	3.8	4	3.9	2.5	3.4
2008	4	12	102	3.3	3.8	4	3.3	3.9	3.6	4.2	4.1	3.1	3.6
2008	4	13	103	3.7	4.1	4.4	4	4.3	3.8	4.9	5.3	3.9	4
2008	4	14	104	4.3	4.6	4.9	4	4.3	4.4	6.4	5.2	3.6	4.8
2008	4	15	105	4.1	4.4	4.9	4.4	4.2	4.3	6.5	4.9	4.4	4.4
2008	4	16	106	3.1	3.5	3.8	3.3	3.4	3.1	4.2	4.1	5.4	3.4
2008	4	17	107	3.4	3.8	4.2	3.8	4.4	3.1	3.4	4.2	4.4	3.6
2008	4	18	108	3.3	3.8	4.1	3.5	3.9	3.2	3.9	4.1	4.3	3.7
2008	4	19	109	3.8	4.2	4.6	3.9	4.7	3.6	3.9	4.4	3.1	4.1
2008	4	20	110	3.6	4	4.4	4.1	4.3	3.5	4.4	4.8	4.8	3.8
2008	4	21	111	3.4	3.8	4.1	3.9	4.1	3.3	4.6	5.2	4.4	3.6
2008	4	22	112	3.4	3.9	4.1	3.9	4	3.4	5.3	6.2	5.5	3.6
2008	4	23	113	3.6	3.7	4.1	4	3.6	3.4	5.9	6.7	5.3	3.8
2008	4	24	114	3.8	4.2	4.6	4.4	4.1	4.3	7.1	6.1	4.5	4
2008	4	25	115	3.7	4.2	4.4	3.6	3.8	4.1	6.5	4.7	6.8	4.1
2008	4	26	116	4.2	4.7	5	4.2	4.7	4.9	7	5.9	4.7	4.6
2008	4	27	117	4	4.5	4.9	4	4.9	4.4	4.5	4.3	5.6	4.3
2008	4	28	118	3.6	4	4.4	3.8	4.5	3.9	3.6	4.4	3.1	3.8
2008	4	29	119	3.5	4	4.4	3.7	4.4	3.5	3.4	3.9	4.7	3.8
2008	4	30	120	3.2	3.7	3.9	3.2	3.8	3.2	3.2	3.9	4.6	3.5
2008	5	1	121	3.5	3.9	4.4	3.9	4.2	3.6	3.9	4.7	3.8	3.8
2008	5	2	122	4.2	4.5	5.1	4.1	4.8	4.4	4.3	4.6	5.5	4.6
2008	5	3	123	4.3	4.8	5.2	4.3	5.4	4.5	4.1	4.8	5	4.8
2008	5	4	124	4.3	4.7	5.1	3.9	5	4.4	4.5	4.9	3.9	4.8
2008	5	5	125	4.3	4.8	5.2	4.1	5.5	4.7	4.1	4.6	4.4	4.8
2008	5	6	126	3.7	4.3	4.6	3.9	4.9	3.9	4	4.4	4	4
2008	5	7	127	3.1	3.5	3.9	3.4	3.5	3.3	3.7	3.8	3.8	3.3
2008	5	8	128	3.2	3.5	3.7	2.7	2.8	3	3.6	4.1	3.5	3.7
2008	5	9	129	2.7	3.2	3.3	3	3.2	2.5	2.9	3.4	3.8	2.8
2008	5	10	130	3.3	3.9	4.1	3.6	4.4	3.5	3.3	3.8	1	3.5
2008	5	11	131	3.1	3.6	3.8	3.2	3.7	3.3	3.6	4.3	1.5	3.3
2008	5	12	132	3.9	4.4	4.7	4.1	4.8	4	4.2	4.6	2.1	4.2
2008	5	13	133	3.9	4.1	4.7	4.1	4.1	4	4.6	5.1	4.3	4.2
2008	5	14	134	3.7	4.1	4.6	4.4	4.1	3.5	5.1	4.8	4	3.9
2008	5	15	135	2.8	3.3	3.5	3	2.9	3	4.3	3.3	5	3
2008	5	16	136	3.7	4.2	4.6	4.1	4.6	4.2	4.3	4.4	3.1	3.9
2008	5	17	137	4	4.5	5	4.8	5	4.1	4.8	5.3	3.2	4.2
2008	5	18	138	3.4	3.9	4.1	3.5	3.8	3.8	4.9	4.6	3.6	3.6
2008	5	19	139	4.4	5	5.2	4.4	5.8	5.1	4.9	6.2	2.9	4.7
2008	5	20	140	4	4.8	4.9	4	4.8	5.1	6.4	5.7	4.9	4.3
2008	5	21	141	5	5.7	6	5.1	6.1	6.2	7.7	6.4	4	5.4
2008	5	22	142	4.9	5.6	5.9	4.8	5.7	6.4	8.2	6	5	5.4
2008	5	23	143	4.8	5.3	5.6	4.8	5.6	5.1	6.6	6.4	8.2	5.3
2008	5	24	144	5.1	5.5	5.9	4.5	5.7	5.5	5.5	5.6	5.7	5.7
2008	5	25	145	4.6	5.2	5.5	4.5	5.9	5.4	5.1	5.2	4.4	5
2008	5	26	146	4	4.7	4.9	4.2	5.1	4.7	5.3	5.2	4.9	4.4
2008	5	27	147	4.6	5.2	5.5	4.8	6	5.5	5.9	6	5.1	4.9
2008	5	28	148	5.4	5.9	6.3	4.9	6.5	6.4	6.5	5.8	4.7	6
2008	5	29	149	4.9	5.6	5.8	4.9	6.2	6	6.7	6.2	5.9	5.3
2008	5	30	150	4.8	5.5	5.8	4.9	6	5.7	6.7	5.8	6.5	5.2
2008	5	31	151	4.8	5.3	5.8	5	5.7	5.7	6.4	6.5	5.8	5.2
2008	6	1	152	4.8	5.4	5.8	5.3	5.8	5.5	7.1	6.8	6.4	5.1
2008	6	2	153	4.6	5.2	5.6	4.9	5.8	5.5	6.5	6.2	6.7	4.9
2008	6	3	154	4.1	4.9	5	4.3	5.2	5.2	6.3	5.7	5.9	4.5
2008	6	4	155	4.8	5.4	5.7	4.9	6.1	5.6	6.3	6.2	6	5.1
2008	6	5	156	5.4	5.9	6.3	4.9	6.1	6.4	7.3	6.5	5.8	6.1
2008	6	6	157	4.3	5.2	5.3	4.6	5.9	5.7	6.1	5.5	7.2	4.6
2008	6	7	158	4.3	5.1	5.3	4.6	5.9	5.5	5.7	5	6.3	4.5
2008	6	8	159	4.5	5.3	5.5	4.7	6.2	5.8	6	5.8	6.2	4.9
2008	6	9	160	5.1	5.8	5.9	4.6	6.3	6.5	6.8	6.5	6	5.7
2008	6	10	161	5.6	6	6.3	4.4	6.2	6.7	6.1	5.1	6.6	6.4
2008	6	11	162	5.1	5.5	5.8	4.2	5.4	5.6	5.8	5.3	6	5.9
2008	6	12	163	5.1	5.7	5.9	4.6	6.3	6	5.8	5.6	6.5	5.7
2008	6	13	164	4.9	5.5	5.7	4.7	6.2	6	6.2	6.4	6.2	5.4
2008	6	14	165	4.6	5.3	5.5	4.4	5.4	5.9	7.3	6.1	5.7	5
2008	6	15	166	5.4	6	6.2	4.9	6.5	6.6	6.9	6.2	6.5	6
2008	6	16	167	5.4	6	6.2	4.9	6.6	6.6	6.7	6.6	6.1	6.1
2008	6	17	168	5	5.6	5.8	4.8	6.1	6.2	7	6.6	7.2	5.5
2008	6	18	169	6.2	6.6	7	5.3	7.1	7.6	7.7	6.8	6.4	7.1
2008	6	19	170	6.4	6.6	7	5	6.7	7.5	8.1	7.2	6.4	7.3
2008	6	20	171	6.5	6.9	7.3	5.5	7.3	8.1	9.1	6.9	6.9	7.4
[truncated: 3,467 more rows]

## Sheet: ETo-PM-10 years ave.
					PM ETo values
	MON	DAY	DOY	2008	2009	2010	2011	2012	2013	2014	2015	2016	2017	Average
	1	1	1	0.6	0.6	0.9	0.7	0.5	0.8	0.6	0.7	0.6	0.6	0.66
	1	2	2	0.6	0.7	1.1	0.6	0.8	0.8	0.8	0.8	0.9	0.5	0.76
	1	3	3	0.8	0.5	1	0.7	0.7	1.3	1.5	0.6	1.2	0.6	0.89
	1	4	4	0.6	1.1	1.2	0.6	1.4	1.2	0.8	1.2	0.5	0.7	0.93
	1	5	5	0.6	0.5	0.6	0.7	1.2	0.8	0.9	0.6	0.5	0.7	0.71
	1	6	6	0.6	0.6	1	0.6	0.7	0.5	1.4	0.5	0.5	0.7	0.71
	1	7	7	0.7	0.6	0.7	0.8	0.6	0.7	0.8	0.6	0.6	0.7	0.68
	1	8	8	0.7	0.7	1.3	0.8	0.6	0.9	0.9	0.6	0.9	0.6	0.8
	1	9	9	0.6	0.7	1.3	0.8	0.5	0.7	0.9	0.5	1.2	0.5	0.77
	1	10	10	0.7	0.7	1.4	1	0.8	1.1	1	0.6	1.4	0.7	0.94
	1	11	11	0.9	0.7	1	1.1	0.9	0.8	1	0.6	0.9	0.8	0.87
	1	12	12	0.8	0.7	1	0.9	0.8	0.7	1	0.5	0.8	0.8	0.8
	1	13	13	0.7	0.6	0.6	0.7	0.7	0.7	0.8	0.5	0.7	0.7	0.67
	1	14	14	0.8	0.8	0.7	0.9	0.8	0.7	0.9	0.7	0.6	0.7	0.76
	1	15	15	1.2	0.7	0.7	1.2	0.7	0.7	1	0.6	0.8	0.7	0.83
	1	16	16	0.9	1	0.9	1.1	0.9	0.7	1	0.8	0.8	0.8	0.89
	1	17	17	1.1	1	1	1.1	0.6	0.8	1	0.7	0.9	0.9	0.91
	1	18	18	1	0.8	0.8	1.2	0.8	0.8	0.9	0.9	0.7	0.9	0.88
	1	19	19	0.9	0.5	0.6	1.1	0.7	0.8	1.1	0.8	0.8	0.8	0.81
	1	20	20	0.9	0.5	0.5	0.9	1	1	1.1	1.3	0.9	1.2	0.93
	1	21	21	0.9	0.6	0.8	1.2	1	1.1	1.2	1.4	1.1	1.6	1.09
	1	22	22	1.2	0.9	0.9	1.5	0.8	1	0.9	0.9	1	0.9	1
	1	23	23	1.1	0.7	1	1.1	0.7	1.1	1.3	0.8	1.3	0.8	0.99
	1	24	24	2	0.6	0.7	1.7	1	0.9	1.1	1.2	1.1	1	1.13
	1	25	25	1.1	0.6	0.7	1.2	0.9	1.2	1.2	1.1	0.8	0.8	0.96
	1	26	26	1.1	0.6	0.7	1.1	0.9	1.2	1.4	1.1	0.8	0.6	0.95
	1	27	27	1	0.7	0.8	0.9	0.5	1	1.1	1.1	1.1	0.7	0.89
	1	28	28	0.7	0.5	0.5	0.9	0.9	1.3	1.2	1.3	1.3	0.9	0.95
	1	29	29	0.8	1.6	1.1	1	1.5	1.4	1.4	1.1	1.7	1.7	1.33
	1	30	30	1.2	0.5	0.8	1.7	0.8	1.3	1.9	1	1.7	0.8	1.17
	1	31	31	1.1	0.9	1.4	1.2	1.1	1.4	1.6	1	1.8	0.9	1.24
	2	1	32	1.2	0.7	1.1	1.1	1.1	1.4	1.7	1.7	1.7	1.1	1.28
	2	2	33	1	0.5	0.6	0.8	1.4	1.1	1	1.9	1.7	1.8	1.18
	2	3	34	1.3	0.6	0.5	1	1.5	1.4	1.5	2	1.6	2.4	1.38
	2	4	35	1.6	0.6	0.9	1.6	1.4	1.3	1.7	1.9	1.5	1.3	1.38
	2	5	36	1.3	0.6	0.5	1.4	1.3	1.6	1.3	2.1	1.4	1.3	1.28
	2	6	37	1.3	0.7	0.5	1.6	1.6	1.3	1.8	2.2	1.9	1.4	1.43
	2	7	38	1.3	1.1	0.9	1.4	1.4	1.2	1.6	2.1	1.8	1.4	1.42
	2	8	39	1.5	0.9	0.7	2.1	1.4	1.8	2.3	2	1.7	1.3	1.57
	2	9	40	1.9	0.8	0.9	2.5	1.2	1.6	2.9	2	1.6	1.3	1.67
	2	10	41	1.5	0.8	0.9	2	1	1.7	2.1	1.7	1.8	1.4	1.49
	2	11	42	1	1	1.4	1.7	1.1	1.6	2.6	1.9	2	1.4	1.57
	2	12	43	1.2	0.9	1.1	1.6	1.3	1.4	2.7	1.8	1.7	1.3	1.5
	2	13	44	1.2	0.7	0.6	1.9	1.7	1.5	2.3	1.8	2.1	1.7	1.55
	2	14	45	1	0.6	1.1	1.5	1.6	1.4	2.3	1.2	2.3	1.3	1.43
	2	15	46	1.4	0.5	1.2	1.2	2.1	1.9	2.2	2	2.6	1.8	1.69
	2	16	47	1	0.6	1.8	1.5	1.9	1.7	2.1	2.1	2.9	1.5	1.71
	2	17	48	0.9	0.9	1.6	1.7	1.5	1.9	2.3	2	3	1.5	1.73
	2	18	49	1.2	0.7	1.3	1.8	0.8	1.7	2.7	1.8	3.3	1.7	1.7
	2	19	50	1.4	0.8	1.6	1.3	1.6	1.8	3.1	1.9	2.7	1.6	1.78
	2	20	51	1.6	0.7	1.4	1.8	1.8	1.2	3.2	1.8	2.7	1.8	1.8
	2	21	52	1.5	0.7	1.3	1.7	2	2	3	1.6	2.6	2.2	1.86
	2	22	53	1.6	1.3	1.9	2.3	2.3	2.4	3.1	2.4	2.5	2.5	2.23
	2	23	54	1.7	0.8	1.7	2.5	1.7	2.3	3	2.3	2.7	2.2	2.09
	2	24	55	1	0.8	1.7	1.4	1.8	2.4	3	2.5	3.1	1.8	1.95
	2	25	56	1.2	0.6	1.6	2.1	1.8	2.5	2.7	2.2	2.7	2	1.94
	2	26	57	1.4	1	1.2	1.3	1.7	3.2	2.7	2.5	4.2	1.9	2.11
	2	27	58	2.1	0.7	1.6	1.8	1.5	2.4	2.8	2.7	3	2.2	2.08
	2	28	59	2.1	0.9	1.3	1.9	2	2.2	2.9	3.1	2.7	2.3	2.14
	3	1	60	2.8	1.3	1.6	3.4	1.3	2.4	3.6	2.9	2.4	2.1	2.38
	3	2	61	2	1.7	1.8	2.8	1.3	2.3	3	2.8	3	2	2.27
	3	3	62	2.2	1.5	1.5	2.3	1.8	1.7	3.1	2.9	2.9	0.8	2.07
	3	4	63	2.4	1.3	1.4	2.7	1.9	2.4	3.3	2.9	3.1	1.7	2.31
	3	5	64	2.4	1.4	1.6	2.9	2.1	2.1	3	3.1	2.8	3.1	2.45
	3	6	65	2	2.5	1.9	2.4	2.5	1.8	3.3	3.2	2.9	3.6	2.61
	3	7	66	2.7	2.1	2.1	2.7	1.9	1.9	3.6	3	2.9	2.7	2.56
	3	8	67	2.4	2	1.1	2.6	2	2.4	3.5	3.3	3.1	2.7	2.51
	3	9	68	3.7	1.8	2	2.8	2.5	3.1	4.3	3.3	3.8	2.4	2.97
	3	10	69	2.8	1.9	2.2	2.6	2.3	3.1	3.5	3.4	3.4	1.9	2.71
	3	11	70	1.9	2	2.4	1.8	2.9	3.2	3.2	3.4	3.9	1.5	2.62
	3	12	71	2.4	2	2.8	2.4	2.1	3.5	3.1	3.1	3.2	1.6	2.62
	3	13	72	2.1	1.7	2.1	2.1	2.7	3.5	3	3	3.6	1.8	2.56
	3	14	73	1.8	1.6	1.9	2.9	3	3.2	2.9	3.2	3.9	2	2.64
	3	15	74	1.1	1.6	2.1	2	2.2	3	3.1	3.1	3.3	1.7	2.32
	3	16	75	2.2	2.3	2.1	3.1	2.4	3.3	3.1	3.4	3.3	2.4	2.76
	3	17	76	2.4	2.3	2.3	3.2	2.1	2.2	3.4	3.5	2.6	1.1	2.51
	3	18	77	2.2	2.1	1.5	3.9	2.9	2.3	3.6	3.5	3.2	2.7	2.79
	3	19	78	2.3	1.6	1.1	4.1	2.5	2.7	4.6	3.1	3.2	3.3	2.85
	3	20	79	2.6	1.6	2.1	3.7	2.1	3	4.3	2.9	3.3	2.5	2.81
	3	21	80	2.3	2	2.1	3.6	3.2	3.2	3.9	2.6	3.2	2.7	2.88
	3	22	81	2.2	2	3.3	2.9	3.5	2.6	4.1	2.8	3.5	2.2	2.91
	3	23	82	2.5	1.8	3.1	2.9	3.6	2.1	4.4	3.2	3.6	3.1	3.03
	3	24	83	2.9	1.7	2.7	2	4	3.1	5.1	3.4	3.9	4.2	3.3
	3	25	84	3.2	2	3	2.8	4	3	4	3.3	4.6	4.2	3.41
	3	26	85	2.7	2	2.8	3.4	3.6	3.1	3.7	3.5	4.1	3.4	3.23
	3	27	86	2.5	1.9	2.8	3.5	3.3	2.8	3.8	3.8	3.7	3.1	3.12
	3	28	87	2.5	1.7	2.7	3.1	3.2	3.4	4	3.6	3.6	2.7	3.05
	3	29	88	2.1	2.1	2.7	3.9	3.3	3.9	4	3.1	3.3	3.6	3.2
	3	30	89	2.1	2.8	2.6	4	2.6	3.5	3	3.2	3.5	3.1	3.04
	3	31	90	1.7	2.5	2.6	3.9	2.1	4	3.4	3.3	4.1	1.9	2.95
	4	1	91	1.8	1.8	1.4	3.8	2.6	4.6	4.1	3.3	5	2.2	3.06
	4	2	92	2.3	2.1	1.6	4.2	1.6	4.5	4.2	3.1	4.5	2.5	3.06
	4	3	93	2.4	2.9	3.1	4.2	2.6	3.9	4.2	3.8	5	4.2	3.63
	4	4	94	2.8	2.3	3.1	3.8	3	4.2	4	3.4	4.8	3.7	3.51
	4	5	95	2.4	2.3	2.3	3.9	4	4.1	3.9	3.5	4.5	4	3.49
	4	6	96	2.3	2.5	3.3	3.4	4	4.7	4.2	3.2	4.5	4.1	3.62
	4	7	97	1.9	2	2.7	3.7	3.3	5.5	4.3	4	5.2	3.8	3.64
	4	8	98	2.7	1.9	2.6	3.3	3.7	4.9	4	3.8	4.8	1.8	3.35
	4	9	99	2.6	1.6	2.2	3.7	4.5	4	3.7	4	4.5	2.8	3.36
	4	10	100	2.8	1.9	2.6	3.8	2.5	4.1	3.7	3.2	4.8	3.4	3.28
	4	11	101	2.5	2.3	2.8	4	3.8	4	3.7	2.1	4.7	3.7	3.36
	4	12	102	3.2	2.2	2.8	3.5	4.3	4.3	4	2.5	5	3.6	3.54
	4	13	103	3.3	2.4	2.4	3.6	3.9	4.5	3.8	3	4.2	2.1	3.32
	4	14	104	3.7	2.4	2.9	3.8	3.4	4.7	4.4	3.2	4.4	2.7	3.56
	4	15	105	4.3	2.4	2.2	4.4	4.5	4.5	4.8	3.8	4.6	3	3.85
	4	16	106	4.1	2.5	3.2	4.2	4.7	3.9	4.6	4.1	4.5	3.6	3.94
	4	17	107	3.1	2.1	3.7	5	4	4.1	4.4	3.6	5.5	3.9	3.94
	4	18	108	3.4	2	3.1	5.1	4.4	4.2	4.3	3.3	5.2	4.2	3.92
	4	19	109	3.3	2.8	3.8	4.8	4.1	3.9	4.3	3.8	5.2	4.7	4.07
	4	20	110	3.8	1.9	3.1	4.2	4.1	4.1	5	3.7	4.9	4.4	3.92
	4	21	111	3.6	2.3	3.4	4.1	3.7	4.1	4.1	3.1	5.1	3.9	3.74
	4	22	112	3.4	1.3	3.3	4	4.3	4.5	4	2.7	5	4.3	3.68
	4	23	113	3.4	1.6	3.3	3.8	4.3	4.2	4.1	2.4	5.1	4.4	3.66
	4	24	114	3.6	3	2.9	4.1	5.5	5.3	4.5	3	4.5	5	4.14
	4	25	115	3.8	1.8	3.4	3.8	3.9	5.4	4.4	3.2	5.8	4.5	4
	4	26	116	3.7	1.6	4.6	4.4	4.8	5.1	4.4	3.4	5.5	4.5	4.2
	4	27	117	4.2	1.1	3.9	4.4	4.7	5.8	4.2	3.2	4.9	4	4.04
	4	28	118	4	1.1	3.1	5	3.8	5.4	4.3	2.4	5.5	3	3.76
	4	29	119	3.6	2	3.1	4.7	4.4	5.5	4.1	3.9	4.8	4.9	4.1
	4	30	120	3.5	2	3.6	4.5	6.7	5.5	4.4	4.5	4.9	5.9	4.55
	5	1	121	3.2	1.5	3.4	4.6	5.5	5.6	4.2	2.6	4.9	3.7	3.92
	5	2	122	3.5	1.5	3.1	4.6	5.4	6.1	4.1	2.9	5.1	2.6	3.89
	5	3	123	4.2	1.4	3.9	5.1	5.2	6.4	4.7	2.8	5.8	2.4	4.19
	5	4	124	4.3	2.3	4.6	5.2	4.9	7	4.8	2.4	5.7	4	4.52
	5	5	125	4.3	1.5	5.1	5.3	4.6	6.2	5.8	3.4	5	3.7	4.49
	5	6	126	4.3	1.2	4.3	5	4.8	5.8	4.8	2.4	4.5	4.2	4.13
	5	7	127	3.7	1.2	4	4.5	4.9	5.6	4.3	2.7	4	4.1	3.9
	5	8	128	3.1	2	4.3	4.4	4.8	5.2	3.8	3.2	4.2	4.3	3.93
	5	9	129	3.2	1.3	4.3	5.2	5.3	5.6	4.7	2.9	4.7	4.5	4.17
	5	10	130	2.7	1.4	4.8	4.7	5.4	4.6	3.6	2.8	5.3	5.3	4.06
	5	11	131	3.3	2.7	4.7	4.9	5.4	4.4	3.9	2.8	5.1	5.7	4.29
	5	12	132	3.1	2.4	4.6	4.3	5.7	5	4	2.6	5.3	5.8	4.28
	5	13	133	3.9	2.8	5	4.3	5.5	4.7	3.1	2.3	5.8	5.9	4.33
	5	14	134	3.9	3.2	5	4.3	5.4	4.4	5.1	2.8	4.8	5.9	4.48
	5	15	135	3.7	3.6	4.4	4.1	4.9	4.9	4.7	2	4.6	5.7	4.26
	5	16	136	2.8	3.2	5	4.5	4.8	5.2	4.2	3	5.2	5.4	4.33
	5	17	137	3.7	3.1	3.8	4.8	4.7	6	3.2	2.9	5	5	4.22
	5	18	138	4	3.3	4.5	4.9	4.7	5.8	2.6	3.4	5.7	4.5	4.34
	5	19	139	3.4	3.2	4	5	5.5	6.2	2.8	3.4	5	4.4	4.29
	5	20	140	4.4	3	4.4	4.9	5.2	5.8	2.1	2.8	5.4	2.6	4.06
	5	21	141	4	3	4.6	4.9	5.2	6	2.7	2.3	5.3	4.7	4.27
	5	22	142	5	2.8	4.7	5.2	4.2	5.6	2.9	3	5.1	3.8	4.23
	5	23	143	4.9	3.7	4	5.3	4.7	6.5	3	2.2	5.1	3.7	4.31
	5	24	144	4.8	3.1	4.6	5.5	4.5	6.1	2.9	3.2	4.8	4.7	4.42
	5	25	145	5.1	2.9	4.8	6.2	4.7	5.4	3.7	3.1	4.8	4.3	4.5
	5	26	146	4.6	3.3	4.5	5.7	4.5	5.7	2.9	3	4.2	5.3	4.37
	5	27	147	4	3.1	5.1	5.1	5.6	6.5	2.6	3.7	4.1	5.5	4.53
	5	28	148	4.6	3	4.8	4.7	5.7	7.2	1.9	4.2	4.9	5.7	4.67
	5	29	149	5.4	2.8	5.4	5.3	5.1	6.8	3.6	2.3	5.4	5.8	4.79
	5	30	150	4.9	3.2	5.3	4.9	5.8	6.5	3.5	1.9	5.3	5.4	4.67
	5	31	151	4.8	3.6	5.6	5.3	5.6	6	3.4	2.5	5	5.3	4.71
	6	1	152	4.8	3.2	4.8	5.4	5.4	6.4	3.2	3.1	5.2	5.4	4.69
	6	2	153	4.8	3.5	5.4	5.1	5.3	6	3.5	2.6	4.8	5.6	4.66
	6	3	154	4.6	3.1	4.5	5.3	5.6	5.6	3.1	2.4	5.6	5.7	4.55
	6	4	155	4.1	2.9	4.9	5.5	5.5	5.7	2.9	3.5	5.4	5.8	4.62
	6	5	156	4.8	3.3	5.5	5.6	6.1	6.8	3.3	4	5.2	6	5.06
	6	6	157	5.4	3.2	6.1	6	6.1	5.5	3.2	4.3	6.6	6	5.24
	6	7	158	4.3	3.5	4.9	5.4	6.4	5.2	3.5	4.6	5.1	6.8	4.97
	6	8	159	4.3	3	4.4	5.2	6	5.3	3	2.8	4.3	7.2	4.55
	6	9	160	4.5	3.8	4.6	5.3	6	5.4	3.8	3.5	4.4	6.9	4.82
	6	10	161	5.1	4.5	4.6	5.3	6.5	5.8	4.5	5	4.5	6.2	5.2
	6	11	162	5.6	3.3	5	5.9	6.3	7.1	3.3	4.6	5	6.2	5.23
	6	12	163	5.1	3.7	6.2	5.9	7.2	6.6	3.7	4.2	6.3	7.3	5.62
	6	13	164	5.1	3.6	6.6	5.5	6.5	5.8	3.6	4	6.3	6.3	5.33
	6	14	165	4.9	3.5	5.7	5	6.3	5.3	3.5	4.4	6	4.2	4.88
	6	15	166	4.6	3.3	5.1	4.2	6.2	5.7	3.3	2.3	5.2	5.7	4.56
	6	16	167	5.4	3.8	5.6	5.7	6.8	6	3.8	3.4	5.1	6.4	5.2
	6	17	168	5.4	4.2	5.8	5.8	7.8	7	4.2	5.3	5	6.8	5.73
	6	18	169	5	4.4	6.9	5.5	7.6	8.1	4.4	6.5	6.3	6.2	6.09
	6	19	170	6.2	5.3	7.8	6.4	8.5	6.9	5.3	5.8	6.9	6.5	6.56
	6	20	171	6.4	5.1	6.4	6.7	7.6	6.7	5.1	4.5	6.1	6.1	6.07
	6	21	172	6.5	4.5	6.1	6.9	7.1	5.9	4.5	6.3	6	5.3	5.91
	6	22	173	6.8	4.9	5.4	7.5	6.8	5.8	4.9	6.7	5.3	6.4	6.05
	6	23	174	5.8	3.7	4.7	6.4	5.3	6	3.7	5.8	5.5	5.9	5.28
	6	24	175	4.8	4.7	4.8	5.5	5.7	5	4.7	5.9	5.5	6.8	5.34
	6	25	176	5.8	4.4	4.6	6.3	6.1	5.8	4.4	6.1	5.1	6.9	5.55
	6	26	177	6.9	5.5	4.8	6.7	6.5	6.5	5.5	6.6	5.4	7.9	6.23
	6	27	178	6.1	4.8	5.5	5.8	6.3	7.1	4.8	5.7	5.8	7.6	5.95
	6	28	179	5.4	4.1	6	5.3	6	7.7	4.1	5.8	6.1	6.6	5.71
	6	29	180	4.9	4.9	6.4	4.9	5.9	6.3	4.9	5.9	6.5	7.5	5.81
	6	30	181	6	4	5.4	5.7	2.7	6	4	5.6	4.9	7.1	5.14
	7	1	182	6	5	6	5.9	6.6	5.9	5	4.8	5.6	7.6	5.84
	7	2	183	5.9	3.6	5.4	6.2	6.9	5.4	3.6	7	5.3	8	5.73
	7	3	184	6.8	4	4.5	6.9	6.9	6.4	4	7.3	4.2	8.2	5.92
	7	4	185	6.7	3.7	6	7.1	6.7	6.6	3.7	6.3	5.3	7.8	5.99
	7	5	186	6.7	2.6	6.4	6.6	5.9	5.8	2.6	6.1	5.4	6.9	5.5
	7	6	187	6.5	2.8	5.6	6.9	6.1	5.2	2.8	6.1	4.4	6.5	5.29
	7	7	188	5.8	2.9	4.7	6.1	7	5.7	2.9	7.5	4	7.5	5.41
	7	8	189	4.9	5.7	5.4	5.4	7.9	5.9	5.7	6	4	8.4	5.93
	7	9	190	5.9	4.5	5.7	6.5	6.3	6.3	4.5	6.4	3.2	7.1	5.64
	7	10	191	6.9	2.9	5.7	7.3	5.4	5.8	2.9	6.2	3.8	6.3	5.32
	7	11	192	6.3	4.2	5.6	6.3	6.8	5.7	4.2	7.5	4.5	8	5.91
	7	12	193	6.1	4.1	5.7	6.1	7.2	5.5	4.1	7.1	4.2	8.2	5.83
	7	13	194	6	2.9	5.4	6	6.7	6.2	2.9	6.6	3.3	7.4	5.34
	7	14	195	5.6	3.4	5.4	5.7	7.3	6.4	3.4	7	4.8	7.6	5.66
	7	15	196	5.6	3.7	5.7	6.1	8.3	5.1	3.7	8.4	5	8.6	6.02
	7	16	197	4.9	4.9	5.8	5.2	8.3	4.9	4.9	8.3	3.7	8.1	5.9
	7	17	198	5.3	4.7	5.1	5.3	8	5.2	4.7	8.1	2.4	8.4	5.72
	7	18	199	5.3	4.8	5	4.3	7.5	5.2	4.8	7.4	2.5	7.6	5.44
	7	19	200	5.4	3.4	5.2	5.2	6.6	4.6	3.4	6.6	2.6	6.5	4.95
	7	20	201	5.4	2.9	5.4	5.5	5.8	4.5	2.9	6.2	2.7	6.1	4.74
	7	21	202	5.8	4.1	5.1	5.4	6.1	6.8	4.1	5.8	2.7	6.1	5.2
	7	22	203	5.6	4.3	5.3	4.7	6.6	7.2	4.3	6.2	3.4	6.4	5.4
	7	23	204	5.2	4.9	7	5.1	6.5	6.3	4.9	6.9	5.1	7	5.89
	7	24	205	5.8	3.7	7.4	5.9	5.8	6.7	3.7	5.9	4.3	6.1	5.53
	7	25	206	5.5	3.9	6.1	5.6	5.7	5.7	3.9	6.3	3.1	6.1	5.19
	7	26	207	5.1	4	6.8	5.3	5.7	6.6	4	5.8	3.1	6.1	5.25
	7	27	208	5.4	4.2	5.7	5.8	5.3	5.9	4.2	6	4.2	5.9	5.26
	7	28	209	4.6	5.1	6.3	5.1	5.8	3.6	5.1	6.7	5.1	6.5	5.39
	7	29	210	4.9	4.6	6.7	4.6	5.3	4.6	4.6	6.4	4.6	6.2	5.25
	7	30	211	4.9	3.9	6.2	4.6	5.2	6	3.9	5.9	3.9	5.9	5.04
	7	31	212	5	3.4	6.2	5	4.5	5.5	3.4	5.3	3.4	5.6	4.73
	8	1	213	5.7	3.2	5.4	5.9	4.8	5.9	3.2	5.1	3.2	5.9	4.83
	8	2	214	5.7	3.9	5.8	4.8	5.7	6.6	3.9	6.1	3.9	6.3	5.27
	8	3	215	4.8	4.9	6.1	4.3	6.2	6.5	4.9	7	4.9	6.7	5.63
	8	4	216	4.6	4.8	5.8	4	6.1	6.2	4.8	7.1	4.8	6.4	5.46
	8	5	217	4.2	4.2	6	3.6	5.5	5.6	4.2	6.3	4.2	6.1	4.99
	8	6	218	4.7	3.7	5.8	4.5	5.8	5.1	3.7	6.2	3.7	6.2	4.94
	8	7	219	5.7	3.8	5.8	3.9	6.5	5.8	3.8	6.5	3.8	7	5.26
	8	8	220	5.6	3.1	5.8	4.2	5.5	5.1	3.1	5.9	3.1	6.2	4.76
	8	9	221	5.2	3.8	5.6	3.8	5.6	3.4	3.8	5.9	3.8	6.6	4.75
	8	10	222	4.9	3.9	5.4	4.7	5.4	5.9	3.9	5.7	3.9	5.9	4.96
	8	11	223	5.5	3.7	6.2	5.3	5.3	6	3.7	5.6	3.7	5.8	5.08
	8	12	224	4.6	3.4	5.6	3.1	5.1	5	3.4	5.6	3.4	5.5	4.47
	8	13	225	3.9	3.1	5.3	2.6	5.3	5.5	3.1	5.7	3.1	5.5	4.31
	8	14	226	4.6	3.5	6.1	2.7	5.2	3.6	3.5	5.8	3.5	5.4	4.39
	8	15	227	4.4	3.3	6	2.1	5.1	3.1	3.3	5.2	3.3	5.4	4.12
	8	16	228	4.3	2.9	5.1	2.6	5	3.7	2.9	5.2	2.9	5.5	4.01
	8	17	229	4.4	3.8	5.4	3.7	5.7	3.3	3.8	6.1	3.8	5.8	4.58
	8	18	230	4.3	3.2	4.7	2.3	6	3.4	3.2	6.5	3.2	5.9	4.27
	8	19	231	4.2	4	4	2.3	5.6	3.1	4	6	4	5.7	4.29
	8	20	232	4.7	3.2	3.7	3.1	4.8	2.9	3.2	5.4	3.2	5.2	3.94
	8	21	233	5.3	3.1	3.9	4.1	4.3	3.2	3.1	4.7	3.1	5	3.98
	8	22	234	5.6	2.8	4.9	3.2	4.2	4.3	2.8	5.3	2.8	4.9	4.08
	8	23	235	3.8	3.8	4.8	3.2	5.5	3.7	3.8	5.7	3.8	5.7	4.38
	8	24	236	3.7	3.7	5	3.5	5.3	3.5	3.7	5.7	3.7	5.6	4.34
	8	25	237	3.7	2.8	3.9	3.7	4.5	3.7	2.8	4.9	2.8	5	3.78
	8	26	238	3.7	3	4.7	2.9	4.8	2.7	3	3.5	3	4.9	3.62
	8	27	239	3.8	2.8	4.9	2.6	4.6	3.2	2.8	4.2	2.8	4.7	3.64
	8	28	240	4.4	2.5	4.6	2.9	4.4	3.2	2.5	4.4	2.5	4.8	3.62
	8	29	241	4.8	2.4	4.5	4.6	4.4	2.8	2.4	4.3	2.4	4.5	3.71
	8	30	242	4.7	2.7	4.5	3.7	4.4	3.6	2.7	4.5	2.7	4.7	3.82
	8	31	243	4.1	2.9	4.4	2.7	3.7	3.4	2.9	4.2	2.9	4.7	3.59
	9	1	244	3.4	3.2	4.8	2.4	3.9	2.4	3.2	4.5	3.2	4.8	3.58
	9	2	245	4.1	3.2	4.4	2.3	3.4	2.3	3.2	3.8	3.2	4.8	3.47
	9	3	246	4.1	3.3	4.4	4.7	4	4.7	3.3	4.8	3.3	4.9	4.15
	9	4	247	4.2	3	4.7	4.2	4	4.2	3	4.4	3	5	3.97
	9	5	248	4.3	3.4	4.6	3.8	4.1	3.8	3.4	4.5	3.4	5	4.03
	9	6	249	3.6	3.1	4.4	3.8	3.2	3.8	3.1	4.5	3.1	4.6	3.72
	9	7	250	3.3	3.2	4.1	2.3	3.7	2.3	3.2	4.8	3.2	5.2	3.53
	9	8	251	3.7	2.8	3.9	2.5	4.7	2.5	2.8	5.4	2.8	5.8	3.69
	9	9	252	3.3	2.4	4.1	3.7	4.5	3.7	2.4	5.5	2.4	5.7	3.77
	9	10	253	3.6	2.5	3.9	3.2	3.2	3.2	2.5	4.3	2.5	4.7	3.36
	9	11	254	4	1.4	3.8	2.6	2.7	2.6	1.4	3.8	1.4	4.5	2.82
	9	12	255	3.3	1.7	3.9	2.9	3.7	2.9	1.7	2.7	1.7	4.3	2.88
	9	13	256	3.5	1.6	4	2.2	3.8	2.2	1.6	3.7	1.6	4.5	2.87
	9	14	257	3.3	2.7	4.3	3.7	3.7	3.7	2.7	4.3	2.7	5	3.61
	9	15	258	2.9	1.8	4	2.8	3.3	2.8	1.8	2.8	1.8	3.3	2.73
	9	16	259	3.2	2.3	3.7	1.8	3.7	1.8	2.3	3.5	2.3	4.3	2.89
	9	17	260	3.1	3.4	4.2	1.7	4.8	1.7	3.4	4.2	3.4	5	3.49
	9	18	261	3	2	4.4	2.5	3.3	2.5	2	2	2	3.6	2.73
	9	19	262	3.2	1.5	4.8	2.1	3.3	2.1	1.5	2.9	1.5	3.9	2.68
	9	20	263	3.5	1.7	3.6	2.3	2.4	2.3	1.7	2.4	1.7	4.1	2.57
	9	21	264	3	1.5	3.4	1.9	2.5	1.9	1.5	2.3	1.5	3.7	2.32
	9	22	265	3.4	1.6	3.3	2.4	1.4	2.4	1.6	2.7	1.6	3.9	2.43
	9	23	266	2.9	2.4	3.4	2.9	2.6	2.9	2.4	3.1	2.4	3.8	2.88
	9	24	267	2.9	1.7	3.7	2.8	3.2	2.8	1.7	3.5	1.7	4.4	2.84
	9	25	268	2.2	1.8	1.8	1.8	2.5	1.8	1.8	3	1.8	3.7	2.22
	9	26	269	3	1.2	3.3	2.2	2.6	2.2	1.2	2.3	1.2	3.1	2.23
	9	27	270	2.3	1.9	3.7	3.6	2.5	3.6	1.9	1.9	1.9	3.1	2.64
	9	28	271	1.8	1.5	3.6	3	3	3	1.5	2.3	1.5	3.4	2.46
	9	29	272	2.6	1.9	2.8	2.6	3	2.6	1.9	1.4	1.9	3.6	2.43
	9	30	273	2.3	2.4	3.3	2.6	2.9	2.6	2.4	2.3	2.4	3.2	2.64
	10	1	274	2	2.5	3.3	1.6	2.9	1.6	2.5	2.2	2.5	3.1	2.42
	10	2	275	2.5	2.4	3.1	1.9	2.9	1.9	2.4	2.3	2.4	2.7	2.45
	10	3	276	2.4	2.3	3	2.2	2.3	2.2	2.3	2.4	2.3	2.6	2.4
	10	4	277	2.6	2.5	2.9	2.2	2.8	2.2	2.5	2.1	2.5	2.5	2.48
	10	5	278	2.3	2.3	2.6	1.9	2.6	1.9	2.3	1.6	2.3	3	2.28
	10	6	279	2.1	2.5	2.8	2	2.7	2	2.5	2.4	2.5	2.9	2.44
	10	7	280	2.2	2.5	2.7	1.7	2.2	1.7	2.5	1.2	2.5	2.7	2.19
	10	8	281	2.1	2.2	2.3	2.1	2.4	2.1	2.2	2.1	2.2	2.3	2.2
	10	9	282	2.3	2.3	2.2	2.2	1.9	2.2	2.3	2.1	2.3	2.3	2.21
	10	10	283	2.1	2.7	2	1.6	1.8	1.6	2.7	2.5	2.7	3	2.27
	10	11	284	2.2	2.3	2	2.3	1.6	2.3	2.3	2.5	2.3	2.6	2.24
	10	12	285	2.1	2.5	2.2	2.3	1.6	2.3	2.5	2.6	2.5	2.6	2.32
	10	13	286	2.2	2.3	2.2	1.9	1.7	1.9	2.3	1.8	2.3	2.8	2.14
	10	14	287	2.3	2.1	1.9	1.8	2.3	1.8	2.1	1.7	2.1	2.7	2.08
	10	15	288	2.2	2.5	1.9	1.4	3	1.4	2.5	2.6	2.5	3.2	2.32
	10	16	289	1.7	2.9	2.2	1.6	3.4	1.6	2.9	3.2	2.9	3.2	2.56
	10	17	290	1.8	3.4	2.1	2.2	3.3	2.2	3.4	3	3.4	2.9	2.77
	10	18	291	2.3	2.2	2.2	2	2.2	2	2.2	2	2.2	2.7	2.2
	10	19	292	2.4	2.6	1.9	1.2	2.2	1.2	2.6	2.7	2.6	2.4	2.18
	10	20	293	3.1	2.6	1.8	1.1	2.7	1.1	2.6	2.9	2.6	2.8	2.33
	10	21	294	1.8	2.1	2.4	2.2	1.8	2.2	2.1	2.7	2.1	2.4	2.18
	10	22	295	1.8	2	2.2	2	1.8	2	2	2.3	2	2.4	2.05
	10	23	296	1.6	1.8	1.8	2	1	2	1.8	1.1	1.8	2.3	1.72
	10	24	297	1.4	2	1.6	2	1	2	2	1.2	2	2.2	1.74
	10	25	298	1.5	1.8	1.5	1.6	0.9	1.6	1.8	2.5	1.8	1.8	1.68
	10	26	299	1.8	1.9	1.8	2.2	1.3	2.2	1.9	2.6	1.9	2.3	1.99
	10	27	300	1.2	2.2	1.7	1.5	1.6	1.5	2.2	2	2.2	2.6	1.87
	10	28	301	1.3	1.5	1.6	1.5	1.6	1.5	1.5	2	1.5	1.4	1.54
	10	29	302	1.4	1.6	1.5	1.5	1.7	1.5	1.6	2.1	1.6	1.6	1.61
	10	30	303	1.5	1.5	1	1.7	1.6	1.7	1.5	1.2	1.5	1.6	1.48
	10	31	304	1.6	1.5	1.1	1.5	1.5	1.5	1.5	1.7	1.5	1.6	1.5
	11	1	305	1.5	1.7	1.3	1.4	1.8	1.4	1.7	2.2	1.7	2	1.67
	11	2	306	1.5	1.5	1.5	1.6	2	1.6	1.5	2.2	1.5	1.8	1.67
	11	3	307	1.4	1.8	1.4	1.1	2	1.1	1.8	2.6	1.8	2.2	1.72
	11	4	308	2.1	1.4	1.3	1.1	1.5	1.1	1.4	1.9	1.4	1.7	1.49
	11	5	309	1.4	1.3	1.3	1.4	1.6	1.4	1.3	2	1.3	1.4	1.44
	11	6	310	1.6	1.3	1.4	1.1	1.1	1.1	1.3	2	1.3	1.4	1.36
	11	7	311	1.8	1.5	1.6	1.4	1.8	1.4	1.5	2.6	1.5	1.7	1.68
	11	8	312	1.6	1.3	1.5	1.4	1.9	1.4	1.3	2.2	1.3	1.7	1.56
	11	9	313	1.3	1.5	1.6	1.4	2.3	1.4	1.5	2.8	1.5	2.3	1.76
	11	10	314	1.1	1.5	2.1	1.2	1	1.2	1.5	1.4	1.5	1.5	1.4
	11	11	315	1	1.7	2	1.2	1	1.2	1.7	2.2	1.7	2	1.57
	11	12	316	1.1	1.7	1.9	0.9	1	0.9	1.7	2	1.7	1.7	1.46
	11	13	317	1.1	1.1	1.7	0.8	0.9	0.8	1.1	1.3	1.1	1.3	1.12
	11	14	318	0.9	1.1	1.2	1.4	1.2	1.4	1.1	1.3	1.1	1.3	1.2
	11	15	319	1.2	1.1	1.5	1.3	1.3	1.3	1.1	1.3	1.1	1.4	1.26
	11	16	320	1.3	0.9	1.3	1.3	1	1.3	0.9	1.8	0.9	1.3	1.2
	11	17	321	1.1	1	1.3	1.4	0.9	1.4	1	1.3	1	1.3	1.17
	11	18	322	1.2	1	1.4	1	0.7	1	1	0.7	1	1.1	1.01
	11	19	323	1.2	1	1.4	1	0.7	1	1	0.8	1	1	1.01
	11	20	324	1.1	1.1	1.4	1.2	1	1.2	1.1	1.3	1.1	1.1	1.16
	11	21	325	1.2	0.9	1.3	1.1	1.1	1.1	0.9	1.2	0.9	1.1	1.08
	11	22	326	1.1	1.1	1.3	0.9	1	0.9	1.1	1.1	1.1	1	1.06
	11	23	327	1	1.4	1.1	1	0.8	1	1.4	0.6	1.4	0.7	1.04
	11	24	328	0.7	1	1.7	1.1	0.8	1.1	1	0.3	1	0.9	0.96
	11	25	329	0.9	0.9	1.6	1.1	0.8	1.1	0.9	0.9	0.9	0.8	0.99
	11	26	330	0.8	1.1	1.1	0.9	1	0.9	1.1	1.2	1.1	0.9	1.01
	11	27	331	0.8	1	1.1	0.9	1	0.9	1	1.2	1	0.9	0.98
	11	28	332	0.8	0.9	1.3	1	1	1	0.9	1.5	0.9	0.6	0.99
	11	29	333	0.7	1.5	1.4	1.3	1.1	1.3	1.5	1.7	1.5	0.7	1.27
	11	30	334	0.7	1.1	1.1	0.8	0.9	0.8	1.1	1	1.1	0.7	0.93
	12	1	335	0.8	1.6	1.1	0.9	1.1	0.9	1.6	1.3	1.6	1.2	1.21
	12	2	336	0.8	1.6	1.4	0.8	1.1	0.8	1.6	1.1	1.6	1.2	1.2
	12	3	337	0.8	1.2	1.8	0.8	0.8	0.8	1.2	0.8	1.2	1.3	1.07
	12	4	338	0.8	1	1.1	0.9	0.7	0.9	1	0.7	1	1.3	0.94
	12	5	339	0.8	0.9	1.1	0.8	1.4	0.8	0.9	1.4	0.9	1	1
	12	6	340	0.8	1.2	1.1	0.5	1.9	0.5	1.2	1.9	1.2	1	1.13
	12	7	341	0.8	0.8	0.9	0.6	0.7	0.6	0.8	0.7	0.8	0.8	0.75
	12	8	342	0.7	0.8	1	0.7	0.2	0.7	0.8	0.2	0.8	0.7	0.66
	12	9	343	0.6	0.7	1.1	0.7	0.1	0.7	0.7	0.1	0.7	0.7	0.61
	12	10	344	0.5	0.7	0.9	0.8	0.5	0.8	0.7	0.5	0.7	0.7	0.68
	12	11	345	0.7	0.7	0.8	0.8	0.4	0.8	0.7	0.4	0.7	0.7	0.67
	12	12	346	0.7	0.8	0.7	0.9	0.5	0.9	0.8	0.5	0.8	0.9	0.75
	12	13	347	0.8	0.8	0.8	0.8	0.6	0.8	0.8	0.6	0.8	0.9	0.77
	12	14	348	0.9	0.9	0.7	0.9	0.9	0.9	0.9	0.9	0.9	1.2	0.91
	12	15	349	0.8	0.6	0.7	0.9	0.6	0.9	0.6	0.6	0.6	0.8	0.71
	12	16	350	0.9	0.6	0.8	1.3	0.8	1.3	0.6	0.8	0.6	0.8	0.85
	12	17	351	1	1.1	0.9	1.4	0.8	1.4	1.1	0.8	1.1	0.8	1.04
	12	18	352	1	1.3	1.2	1.1	0.9	1.1	1.3	0.9	1.3	0.9	1.1
	12	19	353	0.7	1.8	1.2	0.9	1.1	0.9	1.8	1.1	1.8	0.8	1.21
	12	20	354	0.7	0.8	1.6	0.8	0.6	0.8	0.8	0.6	0.8	0.7	0.82
	12	21	355	0.7	0.7	1.6	0.8	0.4	0.8	0.7	0.4	0.7	0.8	0.76
	12	22	356	0.6	0.8	1	0.9	0.5	0.9	0.8	0.5	0.8	0.8	0.76
	12	23	357	0.7	0.6	0.9	0.9	0.2	0.9	0.6	0.2	0.6	0.7	0.63
	12	24	358	0.6	0.6	0.9	1	0.3	1	0.6	0.3	0.6	0.7	0.66
	12	25	359	0.8	0.5	1	0.7	0.4	0.7	0.5	0.4	0.5	0.7	0.62
	12	26	360	0.7	0.6	1.3	0.7	0.3	0.7	0.6	0.3	0.6	0.8	0.66
	12	27	361	0.6	0.6	1.1	0.7	0.3	0.7	0.6	0.3	0.6	0.8	0.63
	12	28	362	0.6	0.7	1.1	0.7	0.4	0.7	0.7	0.4	0.7	0.7	0.67
	12	29	363	0.5	0.9	0.9	0.9	0.7	0.9	0.9	0.7	0.9	0.9	0.82
	12	30	364	0.5	0.6	1.4	0.6	0.6	0.8	0.6	0.6	0.6	0.8	0.71
	12	31	365	0.5	0.7	1.1	0.7	0.6	0.8	0.7	0.6	0.7	0.8	0.72

## Sheet: ETo-PM-Monthly
																	Monthly Average
						ETo-PM													ETo-PM
	month	day	DOY	2008	2009	2010	2011	2012	2013	2014	2015	2016	2017	Ave.			2008	2009	2010	2011	2012	2013	2014	2015	2016	2017	AVE.	Std. Error
	#	#
	1	1	1	0.6	0.6	0.9	0.7	0.5	0.8	0.6	0.7	0.6	0.6	0.66		Jan	0.9	0.722581	0.877419	1	0.832258	0.948387	1.0871	0.841935	0.964516	0.816129	0.899032	0.0301972	0.301972
	1	2	2	0.6	0.7	1.1	0.6	0.8	0.8	0.8	0.8	0.9	0.5	0.76		Feb	1.33871	0.790323	1.16774	1.62581	1.5129	1.74194	2.30645	1.94516	2.28065	1.63871	1.63484	0.136421	1.36421
	1	3	3	0.8	0.5	1	0.7	0.7	1.3	1.5	0.6	1.2	0.6	0.89		Mar	2.35806	1.89677	2.19355	2.98065	2.60968	2.83226	3.60968	3.1871	3.38387	2.50968	2.75613	0.156943	1.56943
	1	4	4	0.6	1.1	1.2	0.6	1.4	1.2	0.8	1.2	0.5	0.7	0.93		Apr	3.13548	2.08387	2.97097	4.1	3.90968	4.56452	4.17742	3.33871	4.87097	3.7	3.68516	0.238452	2.38452
	1	5	5	0.6	0.5	0.6	0.7	1.2	0.8	0.9	0.6	0.5	0.7	0.71		May	4.02581	2.59032	4.53548	4.92581	5.10323	5.76774	3.66452	2.82258	5.00323	4.64194	4.30806	0.29568	2.9568
	1	6	6	0.6	0.6	1	0.6	0.7	0.5	1.4	0.5	0.5	0.7	0.71		Jun	5.29677	3.97742	5.4871	5.70968	6.24839	6.16129	3.97097	4.63548	5.49677	6.34194	5.33258	0.253037	2.53037
	1	7	7	0.7	0.6	0.7	0.8	0.6	0.7	0.8	0.6	0.6	0.7	0.68		Jul	5.67097	3.96129	5.75806	5.73226	6.47419	5.71613	3.96129	6.58387	3.99355	7.05484	5.49065	0.329725	3.29725
	1	8	8	0.7	0.7	1.3	0.8	0.6	0.9	0.9	0.6	0.9	0.6	0.8		Aug	4.63226	3.41613	5.15161	3.56774	5.17097	4.29032	3.41613	5.49355	3.41613	5.59677	4.41516	0.262604	2.62604
	1	9	9	0.6	0.7	1.3	0.8	0.5	0.7	0.9	0.5	1.2	0.5	0.77		Sep	3.26129	2.29032	3.89355	2.77419	3.33226	2.79677	2.29032	3.47742	2.29032	4.30968	3.07161	0.203493	2.03493
	1	10	10	0.7	0.7	1.4	1	0.8	1.1	1	0.6	1.4	0.7	0.94		Oct	1.99355	2.24194	2.1129	1.83548	2.07419	1.83548	2.24194	2.17097	2.24194	2.49032	2.12387	0.0580731	0.580731
	1	11	11	0.9	0.7	1	1.1	0.9	0.8	1	0.6	0.9	0.8	0.87		Nov	1.1871	1.25484	1.42581	1.16774	1.21613	1.16774	1.25484	1.55806	1.25484	1.32581	1.28129	0.0360651	0.360651
	1	12	12	0.8	0.7	1	0.9	0.8	0.7	1	0.5	0.8	0.8	0.8		Dec	0.722581	0.877419	1.07097	0.835484	0.658065	0.845161	0.877419	0.664516	0.877419	0.867742	0.829677	0.0353528	0.353528
	1	13	13	0.7	0.6	0.6	0.7	0.7	0.7	0.8	0.5	0.7	0.7	0.67		Std. Error	0.500747	0.334994	0.529747	0.517727	0.605911	0.575832	0.350178	0.522912	0.46339	0.623963	0.481468
	1	14	14	0.8	0.8	0.7	0.9	0.8	0.7	0.9	0.7	0.6	0.7	0.76			Monthly Total		ETo-PM
	1	15	15	1.2	0.7	0.7	1.2	0.7	0.7	1	0.6	0.8	0.7	0.83			2008	2009	2010	2011	2012	2013	2014	2015	2016	2017	AVE.	Std. Error
	1	16	16	0.9	1	0.9	1.1	0.9	0.7	1	0.8	0.8	0.8	0.89
	1	17	17	1.1	1	1	1.1	0.6	0.8	1	0.7	0.9	0.9	0.91		Jan	27.9	22.2	27.7	31	25.8	29.4	33.7	26.1	29.9	25.3	27.9	0.944967
	1	18	18	1	0.8	0.8	1.2	0.8	0.8	0.9	0.9	0.7	0.9	0.88		Feb	41.5	24.5	36.2	50.4	46.9	54	71.5	60.3	70.7	50.8	50.68	4.22904
	1	19	19	0.9	0.5	0.6	1.1	0.7	0.8	1.1	0.8	0.8	0.8	0.81		Mar	73.1	58.8	68	92.4	80.9	87.8	111.9	98.8	104.9	77.8	85.44	4.86524
	1	20	20	0.9	0.5	0.5	0.9	1	1	1.1	1.3	0.9	1.2	0.93		Apr	97.2	64.6	92.1	127.1	121.2	141.5	129.5	103.5	151	114.7	114.24	7.39202
	1	21	21	0.9	0.6	0.8	1.2	1	1.1	1.2	1.4	1.1	1.6	1.09		May	124.8	80.3	140.6	152.7	158.2	178.8	113.6	87.5	155.1	143.9	133.55	9.16609
	1	22	22	1.2	0.9	0.9	1.5	0.8	1	0.9	0.9	1	0.9	1		Jun	164.2	123.3	170.1	177	193.7	191	123.1	143.7	170.4	196.6	165.31	7.84413
	1	23	23	1.1	0.7	1	1.1	0.7	1.1	1.3	0.8	1.3	0.8	0.99		Jul	175.8	122.8	178.5	177.7	200.7	177.2	122.8	204.1	123.8	218.7	170.21	10.2215
	1	24	24	2	0.6	0.7	1.7	1	0.9	1.1	1.2	1.1	1	1.13		Aug	143.6	105.9	159.7	110.6	160.3	133	105.9	170.3	105.9	173.5	136.87	8.14072
	1	25	25	1.1	0.6	0.7	1.2	0.9	1.2	1.2	1.1	0.8	0.8	0.96		Sep	101.1	71	120.7	86	103.3	86.7	71	107.8	71	133.6	95.22	6.30828
	1	26	26	1.1	0.6	0.7	1.1	0.9	1.2	1.4	1.1	0.8	0.6	0.95		Oct	61.8	69.5	65.5	56.9	64.3	56.9	69.5	67.3	69.5	77.2	65.84	1.80027
	1	27	27	1	0.7	0.8	0.9	0.5	1	1.1	1.1	1.1	0.7	0.89		Nov	36.8	38.9	44.2	36.2	37.7	36.2	38.9	48.3	38.9	41.1	39.72	1.11802
	1	28	28	0.7	0.5	0.5	0.9	0.9	1.3	1.2	1.3	1.3	0.9	0.95		Dec	22.4	27.2	33.2	25.9	20.4	26.2	27.2	20.6	27.2	26.9	25.72	1.09594
	1	29	29	0.8	1.6	1.1	1	1.5	1.4	1.4	1.1	1.7	1.7	1.33		Std.Error	15.5232	10.3914	16.4066	16.0495	18.7832	17.8508	10.8555	16.2103	14.3651	19.3429	14.9245
	1	30	30	1.2	0.5	0.8	1.7	0.8	1.3	1.9	1	1.7	0.8	1.17		Total	1070.2	809	1136.5	1123.9	1213.4	1198.7	1018.6	1138.3	1118.3	1280.1	1110.7
	1	31	31	1.1	0.9	1.4	1.2	1.1	1.4	1.6	1	1.8	0.9	1.24
	2	1	32	1.2	0.7	1.1	1.1	1.1	1.4	1.7	1.7	1.7	1.1	1.28		Average	0.9	0.722581	0.877419	1	0.832258	0.948387	1.0871	0.841935	0.964516	0.816129
	2	2	33	1	0.5	0.6	0.8	1.4	1.1	1	1.9	1.7	1.8	1.18		Total	27.9	22.2	27.7	31	25.8	29.4	33.7	26.1	29.9	25.3
	2	3	34	1.3	0.6	0.5	1	1.5	1.4	1.5	2	1.6	2.4	1.38		Std. Dv.	0.287518	0.228177	0.252897	0.288675	0.237188	0.247482	0.276577	0.274195	0.352655	0.265953
	2	4	35	1.6	0.6	0.9	1.6	1.4	1.3	1.7	1.9	1.5	1.3	1.38		Std. Error	0.0516398	0.0409817	0.0454217	0.0518476	0.0426002	0.0444491	0.0496746	0.0492468	0.0633387	0.0477666
	2	5	36	1.3	0.6	0.5	1.4	1.3	1.6	1.3	2.1	1.4	1.3	1.28
	2	6	37	1.3	0.7	0.5	1.6	1.6	1.3	1.8	2.2	1.9	1.4	1.43
	2	7	38	1.3	1.1	0.9	1.4	1.4	1.2	1.6	2.1	1.8	1.4	1.42
	2	8	39	1.5	0.9	0.7	2.1	1.4	1.8	2.3	2	1.7	1.3	1.57
	2	9	40	1.9	0.8	0.9	2.5	1.2	1.6	2.9	2	1.6	1.3	1.67
	2	10	41	1.5	0.8	0.9	2	1	1.7	2.1	1.7	1.8	1.4	1.49
	2	11	42	1	1	1.4	1.7	1.1	1.6	2.6	1.9	2	1.4	1.57
	2	12	43	1.2	0.9	1.1	1.6	1.3	1.4	2.7	1.8	1.7	1.3	1.5
	2	13	44	1.2	0.7	0.6	1.9	1.7	1.5	2.3	1.8	2.1	1.7	1.55
	2	14	45	1	0.6	1.1	1.5	1.6	1.4	2.3	1.2	2.3	1.3	1.43
	2	15	46	1.4	0.5	1.2	1.2	2.1	1.9	2.2	2	2.6	1.8	1.69
	2	16	47	1	0.6	1.8	1.5	1.9	1.7	2.1	2.1	2.9	1.5	1.71
	2	17	48	0.9	0.9	1.6	1.7	1.5	1.9	2.3	2	3	1.5	1.73
	2	18	49	1.2	0.7	1.3	1.8	0.8	1.7	2.7	1.8	3.3	1.7	1.7
	2	19	50	1.4	0.8	1.6	1.3	1.6	1.8	3.1	1.9	2.7	1.6	1.78
	2	20	51	1.6	0.7	1.4	1.8	1.8	1.2	3.2	1.8	2.7	1.8	1.8
	2	21	52	1.5	0.7	1.3	1.7	2	2	3	1.6	2.6	2.2	1.86
	2	22	53	1.6	1.3	1.9	2.3	2.3	2.4	3.1	2.4	2.5	2.5	2.23
	2	23	54	1.7	0.8	1.7	2.5	1.7	2.3	3	2.3	2.7	2.2	2.09
	2	24	55	1	0.8	1.7	1.4	1.8	2.4	3	2.5	3.1	1.8	1.95
	2	25	56	1.2	0.6	1.6	2.1	1.8	2.5	2.7	2.2	2.7	2	1.94
	2	26	57	1.4	1	1.2	1.3	1.7	3.2	2.7	2.5	4.2	1.9	2.11
	2	27	58	2.1	0.7	1.6	1.8	1.5	2.4	2.8	2.7	3	2.2	2.08
	2	28	59	2.1	0.9	1.3	1.9	2	2.2	2.9	3.1	2.7	2.3	2.14
	3	1	60	2.8	1.3	1.6	3.4	1.3	2.4	3.6	2.9	2.4	2.1	2.38		Average	1.33871	0.790323	1.16774	1.62581	1.5129	1.74194	2.30645	1.94516	2.28065	1.63871
	3	2	61	2	1.7	1.8	2.8	1.3	2.3	3	2.8	3	2	2.27		Total	41.5	24.5	36.2	50.4	46.9	54	71.5	60.3	70.7	50.8
	3	3	62	2.2	1.5	1.5	2.3	1.8	1.7	3.1	2.9	2.9	0.8	2.07		Std. Dv.	0.32319	0.237142	0.412623	0.421875	0.364913	0.484956	0.621791	0.463924	0.664038	0.428701
	3	4	63	2.4	1.3	1.4	2.7	1.9	2.4	3.3	2.9	3.1	1.7	2.31		Std. Error	0.0610771	0.0448157	0.0779785	0.0797269	0.068962	0.0916482	0.117507	0.0876735	0.125491	0.081017
	3	5	64	2.4	1.4	1.6	2.9	2.1	2.1	3	3.1	2.8	3.1	2.45
	3	6	65	2	2.5	1.9	2.4	2.5	1.8	3.3	3.2	2.9	3.6	2.61
	3	7	66	2.7	2.1	2.1	2.7	1.9	1.9	3.6	3	2.9	2.7	2.56
	3	8	67	2.4	2	1.1	2.6	2	2.4	3.5	3.3	3.1	2.7	2.51
	3	9	68	3.7	1.8	2	2.8	2.5	3.1	4.3	3.3	3.8	2.4	2.97
	3	10	69	2.8	1.9	2.2	2.6	2.3	3.1	3.5	3.4	3.4	1.9	2.71
	3	11	70	1.9	2	2.4	1.8	2.9	3.2	3.2	3.4	3.9	1.5	2.62
	3	12	71	2.4	2	2.8	2.4	2.1	3.5	3.1	3.1	3.2	1.6	2.62
	3	13	72	2.1	1.7	2.1	2.1	2.7	3.5	3	3	3.6	1.8	2.56
	3	14	73	1.8	1.6	1.9	2.9	3	3.2	2.9	3.2	3.9	2	2.64
	3	15	74	1.1	1.6	2.1	2	2.2	3	3.1	3.1	3.3	1.7	2.32
	3	16	75	2.2	2.3	2.1	3.1	2.4	3.3	3.1	3.4	3.3	2.4	2.76
	3	17	76	2.4	2.3	2.3	3.2	2.1	2.2	3.4	3.5	2.6	1.1	2.51
	3	18	77	2.2	2.1	1.5	3.9	2.9	2.3	3.6	3.5	3.2	2.7	2.79
	3	19	78	2.3	1.6	1.1	4.1	2.5	2.7	4.6	3.1	3.2	3.3	2.85
	3	20	79	2.6	1.6	2.1	3.7	2.1	3	4.3	2.9	3.3	2.5	2.81
	3	21	80	2.3	2	2.1	3.6	3.2	3.2	3.9	2.6	3.2	2.7	2.88
	3	22	81	2.2	2	3.3	2.9	3.5	2.6	4.1	2.8	3.5	2.2	2.91
	3	23	82	2.5	1.8	3.1	2.9	3.6	2.1	4.4	3.2	3.6	3.1	3.03
	3	24	83	2.9	1.7	2.7	2	4	3.1	5.1	3.4	3.9	4.2	3.3
	3	25	84	3.2	2	3	2.8	4	3	4	3.3	4.6	4.2	3.41
	3	26	85	2.7	2	2.8	3.4	3.6	3.1	3.7	3.5	4.1	3.4	3.23
	3	27	86	2.5	1.9	2.8	3.5	3.3	2.8	3.8	3.8	3.7	3.1	3.12
	3	28	87	2.5	1.7	2.7	3.1	3.2	3.4	4	3.6	3.6	2.7	3.05
	3	29	88	2.1	2.1	2.7	3.9	3.3	3.9	4	3.1	3.3	3.6	3.2
	3	30	89	2.1	2.8	2.6	4	2.6	3.5	3	3.2	3.5	3.1	3.04
	3	31	90	1.7	2.5	2.6	3.9	2.1	4	3.4	3.3	4.1	1.9	2.95
	4	1	91	1.8	1.8	1.4	3.8	2.6	4.6	4.1	3.3	5	2.2	3.06		Average	2.35806	1.89677	2.19355	2.98065	2.60968	2.83226	3.60968	3.1871	3.38387	2.50968
	4	2	92	2.3	2.1	1.6	4.2	1.6	4.5	4.2	3.1	4.5	2.5	3.06		Total	73.1	58.8	68	92.4	80.9	87.8	111.9	98.8	104.9	77.8
	4	3	93	2.4	2.9	3.1	4.2	2.6	3.9	4.2	3.8	5	4.2	3.63		Std. Dv.	0.471009	0.351647	0.579043	0.638446	0.723581	0.606843	0.550972	0.268007	0.477561	0.840775
	4	4	94	2.8	2.3	3.1	3.8	3	4.2	4	3.4	4.8	3.7	3.51		Std. Error	0.0845957	0.0631577	0.103999	0.114668	0.129959	0.108992	0.0989575	0.0481355	0.0857725	0.151008
	4	5	95	2.4	2.3	2.3	3.9	4	4.1	3.9	3.5	4.5	4	3.49
	4	6	96	2.3	2.5	3.3	3.4	4	4.7	4.2	3.2	4.5	4.1	3.62
	4	7	97	1.9	2	2.7	3.7	3.3	5.5	4.3	4	5.2	3.8	3.64
	4	8	98	2.7	1.9	2.6	3.3	3.7	4.9	4	3.8	4.8	1.8	3.35
	4	9	99	2.6	1.6	2.2	3.7	4.5	4	3.7	4	4.5	2.8	3.36
	4	10	100	2.8	1.9	2.6	3.8	2.5	4.1	3.7	3.2	4.8	3.4	3.28
	4	11	101	2.5	2.3	2.8	4	3.8	4	3.7	2.1	4.7	3.7	3.36
	4	12	102	3.2	2.2	2.8	3.5	4.3	4.3	4	2.5	5	3.6	3.54
	4	13	103	3.3	2.4	2.4	3.6	3.9	4.5	3.8	3	4.2	2.1	3.32
	4	14	104	3.7	2.4	2.9	3.8	3.4	4.7	4.4	3.2	4.4	2.7	3.56
	4	15	105	4.3	2.4	2.2	4.4	4.5	4.5	4.8	3.8	4.6	3	3.85
	4	16	106	4.1	2.5	3.2	4.2	4.7	3.9	4.6	4.1	4.5	3.6	3.94
	4	17	107	3.1	2.1	3.7	5	4	4.1	4.4	3.6	5.5	3.9	3.94
	4	18	108	3.4	2	3.1	5.1	4.4	4.2	4.3	3.3	5.2	4.2	3.92
	4	19	109	3.3	2.8	3.8	4.8	4.1	3.9	4.3	3.8	5.2	4.7	4.07
	4	20	110	3.8	1.9	3.1	4.2	4.1	4.1	5	3.7	4.9	4.4	3.92
	4	21	111	3.6	2.3	3.4	4.1	3.7	4.1	4.1	3.1	5.1	3.9	3.74
	4	22	112	3.4	1.3	3.3	4	4.3	4.5	4	2.7	5	4.3	3.68
	4	23	113	3.4	1.6	3.3	3.8	4.3	4.2	4.1	2.4	5.1	4.4	3.66
	4	24	114	3.6	3	2.9	4.1	5.5	5.3	4.5	3	4.5	5	4.14
	4	25	115	3.8	1.8	3.4	3.8	3.9	5.4	4.4	3.2	5.8	4.5	4
	4	26	116	3.7	1.6	4.6	4.4	4.8	5.1	4.4	3.4	5.5	4.5	4.2
	4	27	117	4.2	1.1	3.9	4.4	4.7	5.8	4.2	3.2	4.9	4	4.04
	4	28	118	4	1.1	3.1	5	3.8	5.4	4.3	2.4	5.5	3	3.76
	4	29	119	3.6	2	3.1	4.7	4.4	5.5	4.1	3.9	4.8	4.9	4.1
	4	30	120	3.5	2	3.6	4.5	6.7	5.5	4.4	4.5	4.9	5.9	4.55
	5	1	121	3.2	1.5	3.4	4.6	5.5	5.6	4.2	2.6	4.9	3.7	3.92		Average	3.13548	2.08387	2.97097	4.1	3.90968	4.56452	4.17742	3.33871	4.87097	3.7
	5	2	122	3.5	1.5	3.1	4.6	5.4	6.1	4.1	2.9	5.1	2.6	3.89		Total	97.2	64.6	92.1	127.1	121.2	141.5	129.5	103.5	151	114.7
	5	3	123	4.2	1.4	3.9	5.1	5.2	6.4	4.7	2.8	5.8	2.4	4.19		Std. Dv.	0.72321	0.468399	0.654316	0.470461	0.994771	0.587962	0.332375	0.54935	0.398492	0.975021
	5	4	124	4.3	2.3	4.6	5.2	4.9	7	4.8	2.4	5.7	4	4.52		Std. Error	0.132039	0.0855176	0.119461	0.085894	0.18162	0.107347	0.0606831	0.100297	0.0727543	0.178014
	5	5	125	4.3	1.5	5.1	5.3	4.6	6.2	5.8	3.4	5	3.7	4.49
	5	6	126	4.3	1.2	4.3	5	4.8	5.8	4.8	2.4	4.5	4.2	4.13
	5	7	127	3.7	1.2	4	4.5	4.9	5.6	4.3	2.7	4	4.1	3.9
	5	8	128	3.1	2	4.3	4.4	4.8	5.2	3.8	3.2	4.2	4.3	3.93
	5	9	129	3.2	1.3	4.3	5.2	5.3	5.6	4.7	2.9	4.7	4.5	4.17
	5	10	130	2.7	1.4	4.8	4.7	5.4	4.6	3.6	2.8	5.3	5.3	4.06
	5	11	131	3.3	2.7	4.7	4.9	5.4	4.4	3.9	2.8	5.1	5.7	4.29
	5	12	132	3.1	2.4	4.6	4.3	5.7	5	4	2.6	5.3	5.8	4.28
	5	13	133	3.9	2.8	5	4.3	5.5	4.7	3.1	2.3	5.8	5.9	4.33
	5	14	134	3.9	3.2	5	4.3	5.4	4.4	5.1	2.8	4.8	5.9	4.48
	5	15	135	3.7	3.6	4.4	4.1	4.9	4.9	4.7	2	4.6	5.7	4.26
	5	16	136	2.8	3.2	5	4.5	4.8	5.2	4.2	3	5.2	5.4	4.33
	5	17	137	3.7	3.1	3.8	4.8	4.7	6	3.2	2.9	5	5	4.22
	5	18	138	4	3.3	4.5	4.9	4.7	5.8	2.6	3.4	5.7	4.5	4.34
	5	19	139	3.4	3.2	4	5	5.5	6.2	2.8	3.4	5	4.4	4.29
	5	20	140	4.4	3	4.4	4.9	5.2	5.8	2.1	2.8	5.4	2.6	4.06
	5	21	141	4	3	4.6	4.9	5.2	6	2.7	2.3	5.3	4.7	4.27
	5	22	142	5	2.8	4.7	5.2	4.2	5.6	2.9	3	5.1	3.8	4.23
	5	23	143	4.9	3.7	4	5.3	4.7	6.5	3	2.2	5.1	3.7	4.31
	5	24	144	4.8	3.1	4.6	5.5	4.5	6.1	2.9	3.2	4.8	4.7	4.42
	5	25	145	5.1	2.9	4.8	6.2	4.7	5.4	3.7	3.1	4.8	4.3	4.5
	5	26	146	4.6	3.3	4.5	5.7	4.5	5.7	2.9	3	4.2	5.3	4.37
	5	27	147	4	3.1	5.1	5.1	5.6	6.5	2.6	3.7	4.1	5.5	4.53
	5	28	148	4.6	3	4.8	4.7	5.7	7.2	1.9	4.2	4.9	5.7	4.67
	5	29	149	5.4	2.8	5.4	5.3	5.1	6.8	3.6	2.3	5.4	5.8	4.79
	5	30	150	4.9	3.2	5.3	4.9	5.8	6.5	3.5	1.9	5.3	5.4	4.67
	5	31	151	4.8	3.6	5.6	5.3	5.6	6	3.4	2.5	5	5.3	4.71
	6	1	152	4.8	3.2	4.8	5.4	5.4	6.4	3.2	3.1	5.2	5.4	4.69		Average	4.02581	2.59032	4.53548	4.92581	5.10323	5.76774	3.66452	2.82258	5.00323	4.64194
	6	2	153	4.8	3.5	5.4	5.1	5.3	6	3.5	2.6	4.8	5.6	4.66		Total	124.8	80.3	140.6	152.7	158.2	178.8	113.6	87.5	155.1	143.9
	6	3	154	4.6	3.1	4.5	5.3	5.6	5.6	3.1	2.4	5.6	5.7	4.55		Std. Dv.	0.722481	0.810084	0.559493	0.456047	0.425428	0.72773	0.932934	0.498471	0.47433	1.00822
	6	4	155	4.1	2.9	4.9	5.5	5.5	5.7	2.9	3.5	5.4	5.8	4.62		Std. Error	0.129761	0.145495	0.100488	0.0819084	0.0764092	0.130704	0.16756	0.089528	0.0851922	0.181082
	6	5	156	4.8	3.3	5.5	5.6	6.1	6.8	3.3	4	5.2	6	5.06
	6	6	157	5.4	3.2	6.1	6	6.1	5.5	3.2	4.3	6.6	6	5.24
	6	7	158	4.3	3.5	4.9	5.4	6.4	5.2	3.5	4.6	5.1	6.8	4.97
	6	8	159	4.3	3	4.4	5.2	6	5.3	3	2.8	4.3	7.2	4.55
	6	9	160	4.5	3.8	4.6	5.3	6	5.4	3.8	3.5	4.4	6.9	4.82
	6	10	161	5.1	4.5	4.6	5.3	6.5	5.8	4.5	5	4.5	6.2	5.2
	6	11	162	5.6	3.3	5	5.9	6.3	7.1	3.3	4.6	5	6.2	5.23
	6	12	163	5.1	3.7	6.2	5.9	7.2	6.6	3.7	4.2	6.3	7.3	5.62
	6	13	164	5.1	3.6	6.6	5.5	6.5	5.8	3.6	4	6.3	6.3	5.33
	6	14	165	4.9	3.5	5.7	5	6.3	5.3	3.5	4.4	6	4.2	4.88
	6	15	166	4.6	3.3	5.1	4.2	6.2	5.7	3.3	2.3	5.2	5.7	4.56
	6	16	167	5.4	3.8	5.6	5.7	6.8	6	3.8	3.4	5.1	6.4	5.2
	6	17	168	5.4	4.2	5.8	5.8	7.8	7	4.2	5.3	5	6.8	5.73
	6	18	169	5	4.4	6.9	5.5	7.6	8.1	4.4	6.5	6.3	6.2	6.09
	6	19	170	6.2	5.3	7.8	6.4	8.5	6.9	5.3	5.8	6.9	6.5	6.56
	6	20	171	6.4	5.1	6.4	6.7	7.6	6.7	5.1	4.5	6.1	6.1	6.07
	6	21	172	6.5	4.5	6.1	6.9	7.1	5.9	4.5	6.3	6	5.3	5.91
	6	22	173	6.8	4.9	5.4	7.5	6.8	5.8	4.9	6.7	5.3	6.4	6.05
	6	23	174	5.8	3.7	4.7	6.4	5.3	6	3.7	5.8	5.5	5.9	5.28
	6	24	175	4.8	4.7	4.8	5.5	5.7	5	4.7	5.9	5.5	6.8	5.34
	6	25	176	5.8	4.4	4.6	6.3	6.1	5.8	4.4	6.1	5.1	6.9	5.55
	6	26	177	6.9	5.5	4.8	6.7	6.5	6.5	5.5	6.6	5.4	7.9	6.23
	6	27	178	6.1	4.8	5.5	5.8	6.3	7.1	4.8	5.7	5.8	7.6	5.95
	6	28	179	5.4	4.1	6	5.3	6	7.7	4.1	5.8	6.1	6.6	5.71
	6	29	180	4.9	4.9	6.4	4.9	5.9	6.3	4.9	5.9	6.5	7.5	5.81
	6	30	181	6	4	5.4	5.7	2.7	6	4	5.6	4.9	7.1	5.14
	7	1	182	6	5	6	5.9	6.6	5.9	5	4.8	5.6	7.6	5.84		Average	5.29677	3.97742	5.4871	5.70968	6.24839	6.16129	3.97097	4.63548	5.49677	6.34194
	7	2	183	5.9	3.6	5.4	6.2	6.9	5.4	3.6	7	5.3	8	5.73		Total	164.2	123.3	170.1	177	193.7	191	123.1	143.7	170.4	196.6
	7	3	184	6.8	4	4.5	6.9	6.9	6.4	4	7.3	4.2	8.2	5.92		Std. Dv.	0.749882	0.726962	0.808184	0.667011	1.01287	0.740575	0.731297	1.37345	0.670067	0.791528
	7	4	185	6.7	3.7	6	7.1	6.7	6.6	3.7	6.3	5.3	7.8	5.99		Std. Error	0.136909	0.132724	0.147554	0.121779	0.184925	0.13521	0.133516	0.250757	0.122337	0.144513
	7	5	186	6.7	2.6	6.4	6.6	5.9	5.8	2.6	6.1	5.4	6.9	5.5
	7	6	187	6.5	2.8	5.6	6.9	6.1	5.2	2.8	6.1	4.4	6.5	5.29
	7	7	188	5.8	2.9	4.7	6.1	7	5.7	2.9	7.5	4	7.5	5.41
	7	8	189	4.9	5.7	5.4	5.4	7.9	5.9	5.7	6	4	8.4	5.93
	7	9	190	5.9	4.5	5.7	6.5	6.3	6.3	4.5	6.4	3.2	7.1	5.64
	7	10	191	6.9	2.9	5.7	7.3	5.4	5.8	2.9	6.2	3.8	6.3	5.32
	7	11	192	6.3	4.2	5.6	6.3	6.8	5.7	4.2	7.5	4.5	8	5.91
	7	12	193	6.1	4.1	5.7	6.1	7.2	5.5	4.1	7.1	4.2	8.2	5.83
	7	13	194	6	2.9	5.4	6	6.7	6.2	2.9	6.6	3.3	7.4	5.34
	7	14	195	5.6	3.4	5.4	5.7	7.3	6.4	3.4	7	4.8	7.6	5.66
	7	15	196	5.6	3.7	5.7	6.1	8.3	5.1	3.7	8.4	5	8.6	6.02
	7	16	197	4.9	4.9	5.8	5.2	8.3	4.9	4.9	8.3	3.7	8.1	5.9
	7	17	198	5.3	4.7	5.1	5.3	8	5.2	4.7	8.1	2.4	8.4	5.72
	7	18	199	5.3	4.8	5	4.3	7.5	5.2	4.8	7.4	2.5	7.6	5.44
	7	19	200	5.4	3.4	5.2	5.2	6.6	4.6	3.4	6.6	2.6	6.5	4.95
	7	20	201	5.4	2.9	5.4	5.5	5.8	4.5	2.9	6.2	2.7	6.1	4.74
	7	21	202	5.8	4.1	5.1	5.4	6.1	6.8	4.1	5.8	2.7	6.1	5.2
	7	22	203	5.6	4.3	5.3	4.7	6.6	7.2	4.3	6.2	3.4	6.4	5.4
	7	23	204	5.2	4.9	7	5.1	6.5	6.3	4.9	6.9	5.1	7	5.89
	7	24	205	5.8	3.7	7.4	5.9	5.8	6.7	3.7	5.9	4.3	6.1	5.53
	7	25	206	5.5	3.9	6.1	5.6	5.7	5.7	3.9	6.3	3.1	6.1	5.19
	7	26	207	5.1	4	6.8	5.3	5.7	6.6	4	5.8	3.1	6.1	5.25
	7	27	208	5.4	4.2	5.7	5.8	5.3	5.9	4.2	6	4.2	5.9	5.26
	7	28	209	4.6	5.1	6.3	5.1	5.8	3.6	5.1	6.7	5.1	6.5	5.39
	7	29	210	4.9	4.6	6.7	4.6	5.3	4.6	4.6	6.4	4.6	6.2	5.25
	7	30	211	4.9	3.9	6.2	4.6	5.2	6	3.9	5.9	3.9	5.9	5.04
	7	31	212	5	3.4	6.2	5	4.5	5.5	3.4	5.3	3.4	5.6	4.73
	8	1	213	5.7	3.2	5.4	5.9	4.8	5.9	3.2	5.1	3.2	5.9	4.83		Average	5.67097	3.96129	5.75806	5.73226	6.47419	5.71613	3.96129	6.58387	3.99355	7.05484
	8	2	214	5.7	3.9	5.8	4.8	5.7	6.6	3.9	6.1	3.9	6.3	5.27		Total	175.8	122.8	178.5	177.7	200.7	177.2	122.8	204.1	123.8	218.7
	8	3	215	4.8	4.9	6.1	4.3	6.2	6.5	4.9	7	4.9	6.7	5.63		Std. Dv.	0.621929	0.782593	0.656137	0.768716	0.945504	0.784048	0.782593	0.835503	0.943375	0.918273
	8	4	216	4.6	4.8	5.8	4	6.1	6.2	4.8	7.1	4.8	6.4	5.46		Std. Error	0.111702	0.140558	0.117846	0.138066	0.169818	0.140819	0.140558	0.150061	0.169435	0.164927
	8	5	217	4.2	4.2	6	3.6	5.5	5.6	4.2	6.3	4.2	6.1	4.99
	8	6	218	4.7	3.7	5.8	4.5	5.8	5.1	3.7	6.2	3.7	6.2	4.94
	8	7	219	5.7	3.8	5.8	3.9	6.5	5.8	3.8	6.5	3.8	7	5.26
	8	8	220	5.6	3.1	5.8	4.2	5.5	5.1	3.1	5.9	3.1	6.2	4.76
	8	9	221	5.2	3.8	5.6	3.8	5.6	3.4	3.8	5.9	3.8	6.6	4.75
	8	10	222	4.9	3.9	5.4	4.7	5.4	5.9	3.9	5.7	3.9	5.9	4.96
	8	11	223	5.5	3.7	6.2	5.3	5.3	6	3.7	5.6	3.7	5.8	5.08
	8	12	224	4.6	3.4	5.6	3.1	5.1	5	3.4	5.6	3.4	5.5	4.47
	8	13	225	3.9	3.1	5.3	2.6	5.3	5.5	3.1	5.7	3.1	5.5	4.31
	8	14	226	4.6	3.5	6.1	2.7	5.2	3.6	3.5	5.8	3.5	5.4	4.39
	8	15	227	4.4	3.3	6	2.1	5.1	3.1	3.3	5.2	3.3	5.4	4.12
	8	16	228	4.3	2.9	5.1	2.6	5	3.7	2.9	5.2	2.9	5.5	4.01
	8	17	229	4.4	3.8	5.4	3.7	5.7	3.3	3.8	6.1	3.8	5.8	4.58
	8	18	230	4.3	3.2	4.7	2.3	6	3.4	3.2	6.5	3.2	5.9	4.27
	8	19	231	4.2	4	4	2.3	5.6	3.1	4	6	4	5.7	4.29
	8	20	232	4.7	3.2	3.7	3.1	4.8	2.9	3.2	5.4	3.2	5.2	3.94
	8	21	233	5.3	3.1	3.9	4.1	4.3	3.2	3.1	4.7	3.1	5	3.98
	8	22	234	5.6	2.8	4.9	3.2	4.2	4.3	2.8	5.3	2.8	4.9	4.08
	8	23	235	3.8	3.8	4.8	3.2	5.5	3.7	3.8	5.7	3.8	5.7	4.38
	8	24	236	3.7	3.7	5	3.5	5.3	3.5	3.7	5.7	3.7	5.6	4.34
	8	25	237	3.7	2.8	3.9	3.7	4.5	3.7	2.8	4.9	2.8	5	3.78
	8	26	238	3.7	3	4.7	2.9	4.8	2.7	3	3.5	3	4.9	3.62
	8	27	239	3.8	2.8	4.9	2.6	4.6	3.2	2.8	4.2	2.8	4.7	3.64
	8	28	240	4.4	2.5	4.6	2.9	4.4	3.2	2.5	4.4	2.5	4.8	3.62
	8	29	241	4.8	2.4	4.5	4.6	4.4	2.8	2.4	4.3	2.4	4.5	3.71
	8	30	242	4.7	2.7	4.5	3.7	4.4	3.6	2.7	4.5	2.7	4.7	3.82
	8	31	243	4.1	2.9	4.4	2.7	3.7	3.4	2.9	4.2	2.9	4.7	3.59
	9	1	244	3.4	3.2	4.8	2.4	3.9	2.4	3.2	4.5	3.2	4.8	3.58		Average	4.63226	3.41613	5.15161	3.56774	5.17097	4.29032	3.41613	5.49355	3.41613	5.59677
	9	2	245	4.1	3.2	4.4	2.3	3.4	2.3	3.2	3.8	3.2	4.8	3.47		Total	143.6	105.9	159.7	110.6	160.3	133	105.9	170.3	105.9	173.5
	9	3	246	4.1	3.3	4.4	4.7	4	4.7	3.3	4.8	3.3	4.9	4.15		Std. Dv.	0.646213	0.607232	0.730694	0.932519	0.658379	1.26895	0.607232	0.854765	0.607232	0.655481
	9	4	247	4.2	3	4.7	4.2	4	4.2	3	4.4	3	5	3.97		Std. Error	0.116063	0.109062	0.131237	0.167485	0.118248	0.22791	0.109062	0.15352	0.109062	0.117728
	9	5	248	4.3	3.4	4.6	3.8	4.1	3.8	3.4	4.5	3.4	5	4.03
	9	6	249	3.6	3.1	4.4	3.8	3.2	3.8	3.1	4.5	3.1	4.6	3.72
	9	7	250	3.3	3.2	4.1	2.3	3.7	2.3	3.2	4.8	3.2	5.2	3.53
	9	8	251	3.7	2.8	3.9	2.5	4.7	2.5	2.8	5.4	2.8	5.8	3.69
	9	9	252	3.3	2.4	4.1	3.7	4.5	3.7	2.4	5.5	2.4	5.7	3.77
	9	10	253	3.6	2.5	3.9	3.2	3.2	3.2	2.5	4.3	2.5	4.7	3.36
	9	11	254	4	1.4	3.8	2.6	2.7	2.6	1.4	3.8	1.4	4.5	2.82
	9	12	255	3.3	1.7	3.9	2.9	3.7	2.9	1.7	2.7	1.7	4.3	2.88
	9	13	256	3.5	1.6	4	2.2	3.8	2.2	1.6	3.7	1.6	4.5	2.87
	9	14	257	3.3	2.7	4.3	3.7	3.7	3.7	2.7	4.3	2.7	5	3.61
	9	15	258	2.9	1.8	4	2.8	3.3	2.8	1.8	2.8	1.8	3.3	2.73
	9	16	259	3.2	2.3	3.7	1.8	3.7	1.8	2.3	3.5	2.3	4.3	2.89
	9	17	260	3.1	3.4	4.2	1.7	4.8	1.7	3.4	4.2	3.4	5	3.49
	9	18	261	3	2	4.4	2.5	3.3	2.5	2	2	2	3.6	2.73
	9	19	262	3.2	1.5	4.8	2.1	3.3	2.1	1.5	2.9	1.5	3.9	2.68
	9	20	263	3.5	1.7	3.6	2.3	2.4	2.3	1.7	2.4	1.7	4.1	2.57
	9	21	264	3	1.5	3.4	1.9	2.5	1.9	1.5	2.3	1.5	3.7	2.32
	9	22	265	3.4	1.6	3.3	2.4	1.4	2.4	1.6	2.7	1.6	3.9	2.43
	9	23	266	2.9	2.4	3.4	2.9	2.6	2.9	2.4	3.1	2.4	3.8	2.88
	9	24	267	2.9	1.7	3.7	2.8	3.2	2.8	1.7	3.5	1.7	4.4	2.84
	9	25	268	2.2	1.8	1.8	1.8	2.5	1.8	1.8	3	1.8	3.7	2.22
	9	26	269	3	1.2	3.3	2.2	2.6	2.2	1.2	2.3	1.2	3.1	2.23
	9	27	270	2.3	1.9	3.7	3.6	2.5	3.6	1.9	1.9	1.9	3.1	2.64
	9	28	271	1.8	1.5	3.6	3	3	3	1.5	2.3	1.5	3.4	2.46
	9	29	272	2.6	1.9	2.8	2.6	3	2.6	1.9	1.4	1.9	3.6	2.43
	9	30	273	2.3	2.4	3.3	2.6	2.9	2.6	2.4	2.3	2.4	3.2	2.64
	10	1	274	2	2.5	3.3	1.6	2.9	1.6	2.5	2.2	2.5	3.1	2.42		Average	3.26129	2.29032	3.89355	2.77419	3.33226	2.79677	2.29032	3.47742	2.29032	4.30968
	10	2	275	2.5	2.4	3.1	1.9	2.9	1.9	2.4	2.3	2.4	2.7	2.45		Total	101.1	71	120.7	86	103.3	86.7	71	107.8	71	133.6
	10	3	276	2.4	2.3	3	2.2	2.3	2.2	2.3	2.4	2.3	2.6	2.4		Std. Dv.	0.615726	0.700645	0.628721	0.744745	0.746274	0.752987	0.700645	1.09536	0.700645	0.742678
	10	4	277	2.6	2.5	2.9	2.2	2.8	2.2	2.5	2.1	2.5	2.5	2.48		Std. Error	0.112416	0.12792	0.114788	0.135971	0.13625	0.137476	0.12792	0.199984	0.12792	0.135594
	10	5	278	2.3	2.3	2.6	1.9	2.6	1.9	2.3	1.6	2.3	3	2.28
	10	6	279	2.1	2.5	2.8	2	2.7	2	2.5	2.4	2.5	2.9	2.44
	10	7	280	2.2	2.5	2.7	1.7	2.2	1.7	2.5	1.2	2.5	2.7	2.19
	10	8	281	2.1	2.2	2.3	2.1	2.4	2.1	2.2	2.1	2.2	2.3	2.2
	10	9	282	2.3	2.3	2.2	2.2	1.9	2.2	2.3	2.1	2.3	2.3	2.21
	10	10	283	2.1	2.7	2	1.6	1.8	1.6	2.7	2.5	2.7	3	2.27
	10	11	284	2.2	2.3	2	2.3	1.6	2.3	2.3	2.5	2.3	2.6	2.24
	10	12	285	2.1	2.5	2.2	2.3	1.6	2.3	2.5	2.6	2.5	2.6	2.32
	10	13	286	2.2	2.3	2.2	1.9	1.7	1.9	2.3	1.8	2.3	2.8	2.14
	10	14	287	2.3	2.1	1.9	1.8	2.3	1.8	2.1	1.7	2.1	2.7	2.08
	10	15	288	2.2	2.5	1.9	1.4	3	1.4	2.5	2.6	2.5	3.2	2.32
	10	16	289	1.7	2.9	2.2	1.6	3.4	1.6	2.9	3.2	2.9	3.2	2.56
	10	17	290	1.8	3.4	2.1	2.2	3.3	2.2	3.4	3	3.4	2.9	2.77
	10	18	291	2.3	2.2	2.2	2	2.2	2	2.2	2	2.2	2.7	2.2
	10	19	292	2.4	2.6	1.9	1.2	2.2	1.2	2.6	2.7	2.6	2.4	2.18
	10	20	293	3.1	2.6	1.8	1.1	2.7	1.1	2.6	2.9	2.6	2.8	2.33
	10	21	294	1.8	2.1	2.4	2.2	1.8	2.2	2.1	2.7	2.1	2.4	2.18
	10	22	295	1.8	2	2.2	2	1.8	2	2	2.3	2	2.4	2.05
	10	23	296	1.6	1.8	1.8	2	1	2	1.8	1.1	1.8	2.3	1.72
	10	24	297	1.4	2	1.6	2	1	2	2	1.2	2	2.2	1.74
	10	25	298	1.5	1.8	1.5	1.6	0.9	1.6	1.8	2.5	1.8	1.8	1.68
	10	26	299	1.8	1.9	1.8	2.2	1.3	2.2	1.9	2.6	1.9	2.3	1.99
	10	27	300	1.2	2.2	1.7	1.5	1.6	1.5	2.2	2	2.2	2.6	1.87
	10	28	301	1.3	1.5	1.6	1.5	1.6	1.5	1.5	2	1.5	1.4	1.54
	10	29	302	1.4	1.6	1.5	1.5	1.7	1.5	1.6	2.1	1.6	1.6	1.61
	10	30	303	1.5	1.5	1	1.7	1.6	1.7	1.5	1.2	1.5	1.6	1.48
	10	31	304	1.6	1.5	1.1	1.5	1.5	1.5	1.5	1.7	1.5	1.6	1.5
	11	1	305	1.5	1.7	1.3	1.4	1.8	1.4	1.7	2.2	1.7	2	1.67		Average	1.99355	2.24194	2.1129	1.83548	2.07419	1.83548	2.24194	2.17097	2.24194	2.49032
	11	2	306	1.5	1.5	1.5	1.6	2	1.6	1.5	2.2	1.5	1.8	1.67		Total	61.8	69.5	65.5	56.9	64.3	56.9	69.5	67.3	69.5	77.2
	11	3	307	1.4	1.8	1.4	1.1	2	1.1	1.8	2.6	1.8	2.2	1.72		Std. Dv.	0.432771	0.424872	0.553017	0.331208	0.673284	0.331208	0.424872	0.542951	0.424872	0.481217
	11	4	308	2.1	1.4	1.3	1.1	1.5	1.1	1.4	1.9	1.4	1.7	1.49		Std. Error	0.0777279	0.0763092	0.0993248	0.0594868	0.120925	0.0594868	0.0763092	0.0975169	0.0763092	0.0864291
	11	5	309	1.4	1.3	1.3	1.4	1.6	1.4	1.3	2	1.3	1.4	1.44
	11	6	310	1.6	1.3	1.4	1.1	1.1	1.1	1.3	2	1.3	1.4	1.36
	11	7	311	1.8	1.5	1.6	1.4	1.8	1.4	1.5	2.6	1.5	1.7	1.68
	11	8	312	1.6	1.3	1.5	1.4	1.9	1.4	1.3	2.2	1.3	1.7	1.56
	11	9	313	1.3	1.5	1.6	1.4	2.3	1.4	1.5	2.8	1.5	2.3	1.76
	11	10	314	1.1	1.5	2.1	1.2	1	1.2	1.5	1.4	1.5	1.5	1.4
	11	11	315	1	1.7	2	1.2	1	1.2	1.7	2.2	1.7	2	1.57
	11	12	316	1.1	1.7	1.9	0.9	1	0.9	1.7	2	1.7	1.7	1.46
	11	13	317	1.1	1.1	1.7	0.8	0.9	0.8	1.1	1.3	1.1	1.3	1.12
	11	14	318	0.9	1.1	1.2	1.4	1.2	1.4	1.1	1.3	1.1	1.3	1.2
	11	15	319	1.2	1.1	1.5	1.3	1.3	1.3	1.1	1.3	1.1	1.4	1.26
	11	16	320	1.3	0.9	1.3	1.3	1	1.3	0.9	1.8	0.9	1.3	1.2
	11	17	321	1.1	1	1.3	1.4	0.9	1.4	1	1.3	1	1.3	1.17
	11	18	322	1.2	1	1.4	1	0.7	1	1	0.7	1	1.1	1.01
	11	19	323	1.2	1	1.4	1	0.7	1	1	0.8	1	1	1.01
	11	20	324	1.1	1.1	1.4	1.2	1	1.2	1.1	1.3	1.1	1.1	1.16
	11	21	325	1.2	0.9	1.3	1.1	1.1	1.1	0.9	1.2	0.9	1.1	1.08
	11	22	326	1.1	1.1	1.3	0.9	1	0.9	1.1	1.1	1.1	1	1.06
	11	23	327	1	1.4	1.1	1	0.8	1	1.4	0.6	1.4	0.7	1.04
	11	24	328	0.7	1	1.7	1.1	0.8	1.1	1	0.3	1	0.9	0.96
	11	25	329	0.9	0.9	1.6	1.1	0.8	1.1	0.9	0.9	0.9	0.8	0.99
	11	26	330	0.8	1.1	1.1	0.9	1	0.9	1.1	1.2	1.1	0.9	1.01
	11	27	331	0.8	1	1.1	0.9	1	0.9	1	1.2	1	0.9	0.98
	11	28	332	0.8	0.9	1.3	1	1	1	0.9	1.5	0.9	0.6	0.99
	11	29	333	0.7	1.5	1.4	1.3	1.1	1.3	1.5	1.7	1.5	0.7	1.27
	11	30	334	0.7	1.1	1.1	0.8	0.9	0.8	1.1	1	1.1	0.7	0.93
	12	1	335	0.8	1.6	1.1	0.9	1.1	0.9	1.6	1.3	1.6	1.2	1.21		Average	1.1871	1.25484	1.42581	1.16774	1.21613	1.16774	1.25484	1.55806	1.25484	1.32581
	12	2	336	0.8	1.6	1.4	0.8	1.1	0.8	1.6	1.1	1.6	1.2	1.2		Total	36.8	38.9	44.2	36.2	37.7	36.2	38.9	48.3	38.9	41.1
	12	3	337	0.8	1.2	1.8	0.8	0.8	0.8	1.2	0.8	1.2	1.3	1.07		Std. Dv.	0.340335	0.276693	0.256863	0.218155	0.435199	0.218155	0.276693	0.623845	0.276693	0.462578
	12	4	338	0.8	1	1.1	0.9	0.7	0.9	1	0.7	1	1.3	0.94		Std. Error	0.0621364	0.050517	0.0468965	0.0398294	0.079456	0.0398294	0.050517	0.113898	0.050517	0.0844548
	12	5	339	0.8	0.9	1.1	0.8	1.4	0.8	0.9	1.4	0.9	1	1
	12	6	340	0.8	1.2	1.1	0.5	1.9	0.5	1.2	1.9	1.2	1	1.13
	12	7	341	0.8	0.8	0.9	0.6	0.7	0.6	0.8	0.7	0.8	0.8	0.75
	12	8	342	0.7	0.8	1	0.7	0.2	0.7	0.8	0.2	0.8	0.7	0.66
	12	9	343	0.6	0.7	1.1	0.7	0.1	0.7	0.7	0.1	0.7	0.7	0.61
	12	10	344	0.5	0.7	0.9	0.8	0.5	0.8	0.7	0.5	0.7	0.7	0.68
	12	11	345	0.7	0.7	0.8	0.8	0.4	0.8	0.7	0.4	0.7	0.7	0.67
	12	12	346	0.7	0.8	0.7	0.9	0.5	0.9	0.8	0.5	0.8	0.9	0.75
	12	13	347	0.8	0.8	0.8	0.8	0.6	0.8	0.8	0.6	0.8	0.9	0.77
	12	14	348	0.9	0.9	0.7	0.9	0.9	0.9	0.9	0.9	0.9	1.2	0.91
	12	15	349	0.8	0.6	0.7	0.9	0.6	0.9	0.6	0.6	0.6	0.8	0.71
	12	16	350	0.9	0.6	0.8	1.3	0.8	1.3	0.6	0.8	0.6	0.8	0.85
	12	17	351	1	1.1	0.9	1.4	0.8	1.4	1.1	0.8	1.1	0.8	1.04
	12	18	352	1	1.3	1.2	1.1	0.9	1.1	1.3	0.9	1.3	0.9	1.1
	12	19	353	0.7	1.8	1.2	0.9	1.1	0.9	1.8	1.1	1.8	0.8	1.21
	12	20	354	0.7	0.8	1.6	0.8	0.6	0.8	0.8	0.6	0.8	0.7	0.82
	12	21	355	0.7	0.7	1.6	0.8	0.4	0.8	0.7	0.4	0.7	0.8	0.76
	12	22	356	0.6	0.8	1	0.9	0.5	0.9	0.8	0.5	0.8	0.8	0.76
	12	23	357	0.7	0.6	0.9	0.9	0.2	0.9	0.6	0.2	0.6	0.7	0.63
	12	24	358	0.6	0.6	0.9	1	0.3	1	0.6	0.3	0.6	0.7	0.66
	12	25	359	0.8	0.5	1	0.7	0.4	0.7	0.5	0.4	0.5	0.7	0.62
	12	26	360	0.7	0.6	1.3	0.7	0.3	0.7	0.6	0.3	0.6	0.8	0.66
	12	27	361	0.6	0.6	1.1	0.7	0.3	0.7	0.6	0.3	0.6	0.8	0.63
	12	28	362	0.6	0.7	1.1	0.7	0.4	0.7	0.7	0.4	0.7	0.7	0.67
	12	29	363	0.5	0.9	0.9	0.9	0.7	0.9	0.9	0.7	0.9	0.9	0.82
	12	30	364	0.5	0.6	1.4	0.6	0.6	0.8	0.6	0.6	0.6	0.8	0.71
	12	31	365	0.5	0.7	1.1	0.7	0.6	0.8	0.7	0.6	0.7	0.8	0.72
																Average	0.722581	0.877419	1.07097	0.835484	0.658065	0.845161	0.877419	0.664516	0.877419	0.867742
			TOTAL	1054.9	795.5	1119.5	1106.6	1197.1	1179.7	1002.5	1123.5	1099.6	1263.2	1094.21		Total	22.4	27.2	33.2	25.9	20.4	26.2	27.2	20.6	27.2	26.9
																Std. Dv.	0.135916	0.329353	0.272266	0.18538	0.380153	0.178585	0.329353	0.389485	0.329353	0.186882
																Std. Error	0.0244112	0.0591535	0.0489005	0.0332952	0.0682775	0.0320747	0.0591535	0.0699537	0.0591535	0.0335649
