# Supplementary material for: Assessing of evapotranspiration models using limited climatic data in Southeast Anatolian Project Region of Turkey
Source: PeerJ. 2021 Jun 9;9:e11571. doi: 10.7717/peerj.11571 (PMC8197036; doi:10.7717/peerj.11571)
Supplement: Supplemental Information 2 [file peerj-09-11571-s002.xls]

## Sheet: ETo
	Daily ETo estimates (mm/day)
	YEAR	MON	DAY	DOY	PM	PEN	FAOP	PT	FAOR	FAOB	SCSB	HARG	Epan	PMD
	2003	1	1	1	0.7	1	1	0.6	0.2	0.3	0.8	0.8	-999	0.8
	2003	1	2	2	0.7	1	1.1	0.6	-0.2	0.2	0.9	0.5	-999	0.9
	2003	1	3	3	0.5	0.7	0.7	0.6	-0.1	0.1	1.1	0.6	-999	0.6
	2003	1	4	4	1.2	1.4	1.5	0.6	-0.1	0.2	1	0.5	-999	1.5
	2003	1	5	5	0.5	0.6	0.6	0.6	-0.1	0.1	1.3	0.7	-999	0.6
	2003	1	6	6	0.7	1	1	0.7	-0.2	0.4	1.9	1.1	-999	0.8
	2003	1	7	7	0.7	0.9	0.9	0.7	-0.1	0.3	1.6	0.8	-999	0.7
	2003	1	8	8	0.8	1.2	1.2	0.7	0.9	1.1	1.7	1	-999	0.9
	2003	1	9	9	0.7	1.1	1.1	0.7	1.3	1.2	1.6	1.2	-999	0.8
	2003	1	10	10	0.8	1.1	1.2	0.7	1.2	1.2	1.5	1.2	-999	0.9
	2003	1	11	11	0.8	1.1	1.2	0.7	1.3	1.2	1.5	1.3	-999	1
	2003	1	12	12	0.8	1.1	1.1	0.7	0.6	0.9	1.5	1.3	-999	0.9
	2003	1	13	13	0.6	0.9	0.9	0.8	0.8	0.7	1.4	0.8	-999	0.7
	2003	1	14	14	0.7	1	1	0.7	0	0.4	1.2	0.7	-999	0.7
	2003	1	15	15	0.7	1	1	0.7	1.4	0.9	1.1	0.9	-999	0.7
	2003	1	16	16	0.9	1.1	1.2	0.7	1.6	1.3	1	1.2	-999	1.1
	2003	1	17	17	1	1.3	1.4	0.7	1.7	1.3	1.1	1.3	-999	1.1
	2003	1	18	18	0.8	1.1	1.2	0.7	1.3	1	1.1	1.2	-999	0.9
	2003	1	19	19	0.7	0.8	0.8	0.9	1.1	0.3	1.2	1.2	-999	0.7
	2003	1	20	20	0.6	0.6	0.6	0.8	0.6	0.1	1	1	-999	0.6
	2003	1	21	21	0.4	0.5	0.5	0.6	0.1	0	0.9	0.5	-999	0.4
	2003	1	22	22	0.7	1	1	0.7	0.4	0.5	1	0.7	-999	0.8
	2003	1	23	23	0.7	1	1	0.8	0.6	0.7	1.2	1.1	-999	0.7
	2003	1	24	24	0.9	1.1	1.2	1	1.5	1.1	1.5	1.4	-999	1
	2003	1	25	25	0.9	1.2	1.2	1.1	1.6	1.3	1.7	1.5	-999	1
	2003	1	26	26	1	1.2	1.2	1.1	1.6	1.3	1.6	1.5	-999	1
	2003	1	27	27	0.6	0.9	0.9	0.7	0	0.3	1	0.8	-999	0.7
	2003	1	28	28	0.8	0.8	0.8	1	1	0.3	1.3	1.2	-999	0.8
	2003	1	29	29	1.4	1.6	1.7	0.7	0.1	0.4	1	0.8	-999	1.8
	2003	1	30	30	0.5	0.6	0.6	0.7	-0.1	0.1	1.3	0.7	-999	0.5
	2003	1	31	31	1.1	1.3	1.4	0.8	0.1	0.6	1.5	1.2	-999	1.2
	2003	2	1	32	0.7	0.9	0.9	0.9	0.4	0.4	1.5	1.4	-999	0.8
	2003	2	2	33	0.6	0.7	0.7	0.8	0.3	0.2	1.5	1.4	-999	0.6
	2003	2	3	34	0.5	0.6	0.5	0.7	0	0.1	1.3	1.1	-999	0.5
	2003	2	4	35	0.5	0.6	0.5	0.7	0	0.1	1.2	0.8	-999	0.5
	2003	2	5	36	0.8	1	0.9	1.2	1.1	0.3	1.3	1.4	-999	0.9
	2003	2	6	37	0.6	0.7	0.7	0.8	0.2	0.3	1.6	1.4	-999	0.6
	2003	2	7	38	1.1	1.3	1.3	1.1	1	1	1.6	1.4	-999	1.2
	2003	2	8	39	0.9	1.1	1.1	0.9	0.5	0.7	1.3	1.3	-999	1
	2003	2	9	40	0.9	1.2	1.2	0.9	0.7	0.5	1.1	1	-999	1
	2003	2	10	41	1	1.2	1.2	1.1	1.2	0.7	1	1.2	-999	1
	2003	2	11	42	1	1.3	1.4	1.2	1.7	0.8	0.8	1.2	-999	1.1
	2003	2	12	43	0.9	1.1	1.1	0.8	0.5	0.3	0.9	1.2	-999	1
	2003	2	13	44	0.4	0.5	0.5	0.6	-0.2	-0.1	0.6	0.8	-999	0.5
	2003	2	14	45	0.5	0.6	0.6	0.8	0.1	0	0.9	0.9	-999	0.5
	2003	2	15	46	0.7	0.8	0.8	1	0.6	0.1	1	1	-999	0.7
	2003	2	16	47	1.1	1.3	1.3	1.3	1.4	0.7	1.1	1.4	-999	1.2
	2003	2	17	48	1.3	1.5	1.5	1.5	1.8	0.9	1.2	1.6	-999	1.3
	2003	2	18	49	0.7	0.9	0.9	0.7	0	0.2	0.7	0.9	-999	0.8
	2003	2	19	50	0.8	1.1	1.1	0.8	0.3	0.4	0.7	1	-999	0.9
	2003	2	20	51	1.2	1.4	1.5	1.3	1.5	1	1.2	1.4	-999	1.3
	2003	2	21	52	0.8	0.9	1	0.8	0.3	0.3	0.8	1	-999	0.9
	2003	2	22	53	1.3	1.5	1.7	1.5	1.9	0.7	0.8	1.2	-999	1.4
	2003	2	23	54	0.7	0.9	0.9	0.8	0.2	0.2	0.6	0.9	-999	0.8
	2003	2	24	55	0.7	0.8	0.8	0.7	-0.1	0.2	1.1	1.2	-999	0.7
	2003	2	25	56	0.9	1.1	1	1	0.7	0.4	0.9	1.2	-999	0.9
	2003	2	26	57	1.1	1.2	1.3	1.4	1.3	0.2	0.8	1.2	-999	1.1
	2003	2	27	58	1.4	1.6	1.7	1.7	2	0.7	1	1.6	-999	1.5
	2003	2	28	59	1.4	1.6	1.7	1.8	1.9	0.7	1.1	1.8	-999	1.5
	2003	3	1	60	1.4	1.6	1.7	1.9	1.9	0.6	1.1	1.9	-999	1.4
	2003	3	2	61	1.3	1.5	1.5	1.2	1	0.8	1	1.6	-999	1.4
	2003	3	3	62	0.8	1	1	0.9	0.3	0.4	1.4	1.3	-999	0.9
	2003	3	4	63	1.1	1.2	1.2	1.3	0.8	0.7	1.6	1.5	-999	1.1
	2003	3	5	64	1.2	1.4	1.4	1.3	0.9	0.9	1.9	2.2	-999	1.3
	2003	3	6	65	2.2	2.4	2.5	1.1	0.6	1.3	2.1	2	-999	2.7
	2003	3	7	66	2.1	2.5	2.7	2	2.9	2.3	2	2.5	-999	2.3
	2003	3	8	67	2.1	2.4	2.6	2.1	2.8	2.3	2.1	2.5	-999	2.2
	2003	3	9	68	1.1	1.5	1.5	1	0.3	0.9	1.9	1.6	-999	1.2
	2003	3	10	69	1.6	2.1	2.1	1.5	1.6	1.7	1.8	2.2	-999	1.7
	2003	3	11	70	2.1	2.4	2.7	2.1	2.7	2.4	2	2.4	-999	2.3
	2003	3	12	71	2.1	2.5	2.8	2.2	3	2.5	1.9	2	-999	2.3
	2003	3	13	72	1.8	2.2	2.3	2.5	2.5	1.2	1.8	2.4	-999	1.9
	2003	3	14	73	1.2	1.4	1.4	1.5	1	0.8	1.9	2.5	-999	1.3
	2003	3	15	74	1.9	2.1	2.2	1.7	1.6	1.9	2.5	2.8	-999	2.1
	2003	3	16	75	2.9	3.1	3.3	2	2.7	2.7	2.5	3.1	-999	3.4
	2003	3	17	76	2.7	3.1	3.2	1.9	2.7	2.8	2.5	2.9	-999	3.2
	2003	3	18	77	1.7	2	2.1	1.2	0.7	1.3	2.3	2	-999	2
	2003	3	19	78	1.4	1.6	1.6	1.4	1	1.1	1.9	2	-999	1.5
	2003	3	20	79	1.6	1.8	1.9	2.1	1.8	1.1	1.7	2.1	-999	1.7
	2003	3	21	80	2	2.3	2.5	2.2	2.6	1.7	1.3	2.4	-999	2.1
	2003	3	22	81	1.4	1.7	1.8	1.3	1	1.1	1.5	2.1	-999	1.6
	2003	3	23	82	1.7	2	2.1	1.6	1.5	1.4	1.7	2.3	-999	1.9
	2003	3	24	83	0.9	1.1	1.1	0.8	-0.1	0.4	1.5	1.7	-999	1.1
	2003	3	25	84	1.6	1.8	1.9	1.3	0.8	1.3	2	2.1	-999	1.9
	2003	3	26	85	1.6	1.9	2	1.5	1.4	1.2	1.3	2.1	-999	1.8
	2003	3	27	86	2.5	3	3.3	2.5	3.7	2.5	1.5	2.4	-999	2.8
	2003	3	28	87	2.2	2.5	2.9	2.6	3.1	1.7	1.2	2.3	-999	2.4
	2003	3	29	88	2.5	2.9	3.2	2.5	3.3	2.5	1.5	2.6	-999	2.8
	2003	3	30	89	2.2	2.5	2.7	2	2.3	2.2	1.8	2.6	-999	2.5
	2003	3	31	90	2.4	2.7	3	2.6	3	2.4	2.1	2.8	-999	2.5
	2003	4	1	91	2.4	2.6	2.8	3.2	2.7	1.5	2.5	3.3	3.6	2.4
	2003	4	2	92	1.7	1.9	2	1.7	1.2	1.6	2.8	3.1	3.2	1.9
	2003	4	3	93	3	3.3	3.5	2.4	2.9	3.1	3.6	3.5	2.1	3.4
	2003	4	4	94	2.5	3	3.1	2.5	2.5	3	4.3	4.2	3.6	2.7
	2003	4	5	95	3.1	3.4	3.8	3	3.3	3.7	4.5	4.3	4.6	3.4
	2003	4	6	96	3.3	3.7	4.1	3.5	4.3	3.6	3.6	3.3	5.2	3.5
	2003	4	7	97	2.5	2.8	3.1	2.8	2.8	2.6	3.1	3.5	3.6	2.7
	2003	4	8	98	1.8	2.1	2.1	1.9	1.4	1.9	3.4	3.4	2.6	2
	2003	4	9	99	3	3.3	3.7	3.8	3.5	2.6	3.6	3.3	2	3.1
	2003	4	10	100	2.8	3	3.3	3.4	3.2	2.5	3.1	3.8	3.1	2.9
	2003	4	11	101	3.4	3.9	4.3	3.6	4.6	4.2	3.6	4.2	2.7	3.6
	2003	4	12	102	2.9	3.2	3.6	3.2	3.2	2.9	3.8	4	6	3.2
	2003	4	13	103	3.4	3.8	4.3	3.9	4.2	3.8	4.1	4.3	7.2	3.6
	2003	4	14	104	3.5	4.1	4.4	3.7	4.8	4.3	4	4.4	5	3.8
	2003	4	15	105	1.8	1.9	2	1.2	0.4	1.5	3.2	3.1	3.4	2.2
	2003	4	16	106	2.5	2.8	2.9	1.9	1.8	2.3	2.7	3.1	2.8	2.9
	2003	4	17	107	3.2	3.6	4	3.7	4	3.7	3.3	3.8	2.2	3.4
	2003	4	18	108	1.3	1.4	1.4	1.2	0.5	1.1	3.1	2.4	4.5	1.4
	2003	4	19	109	3	3.1	3.4	2.7	2.7	3.1	3.7	4	1.7	3.4
	2003	4	20	110	2.4	2.7	2.9	3.2	2.6	1.7	2.9	2.9	3.7	2.4
	2003	4	21	111	2.5	2.9	3.1	2.8	2.9	2.6	2.8	3.6	0.9	2.7
	2003	4	22	112	2.5	2.9	3.1	2.9	2.8	2.5	3	3.3	1.4	2.6
	2003	4	23	113	2.6	2.9	3.2	3.1	2.9	2.6	3.1	4	1.6	2.8
	2003	4	24	114	4	4.2	4.2	2.3	2.6	3.7	4.1	3.9	2.7	4.8
	2003	4	25	115	2.6	3.3	3.4	2.3	2.3	3.3	4.3	3.4	2.3	2.9
	2003	4	26	116	3.1	3.7	3.9	3.2	3.9	3.6	3.5	3.9	4.4	3.3
	2003	4	27	117	2.7	3.1	3.3	3.3	3.1	2.4	3	3.7	3.7	2.8
	2003	4	28	118	3.4	3.9	4.4	4.1	4.5	4	3.4	3.8	2.5	3.5
	2003	4	29	119	3.1	3.4	3.8	3.3	3.5	3.3	3.5	4.4	3.6	3.3
	2003	4	30	120	4.1	4.2	5	3.7	4.4	4.6	4.1	4.9	3.9	4.7
	2003	5	1	121	4.1	4.5	5.2	4.4	5.1	5	4.7	5.1	7.9	4.4
	2003	5	2	122	4	4.6	5.2	4.5	5.3	5.3	4.9	4.8	6.7	4.3
	2003	5	3	123	4.3	4.9	5.5	4.8	5.6	5.5	5.8	5.7	7.9	4.5
	2003	5	4	124	4.6	5.1	5.8	5	5.5	5.8	6.3	6.2	7.1	5
	2003	5	5	125	4.2	4.7	5.2	4.5	4.9	5.2	6.4	6.1	8.1	4.5
	2003	5	6	126	4.3	5	5.6	5.1	5.5	5.9	6.6	5.3	6.2	4.5
	2003	5	7	127	4	4.7	5.3	4.6	5.6	5.3	4.6	4.6	8.9	4.2
	2003	5	8	128	4.2	4.8	5.4	4.7	5.6	5.3	4.8	5.3	9.1	4.4
	2003	5	9	129	4.4	4.8	5.3	5.1	5.2	4.3	5.6	6	10.2	4.6
	2003	5	10	130	4.3	4.6	5.2	5.2	4.7	4.3	6.3	6.4	9.2	4.5
	2003	5	11	131	4.6	4.9	5.5	5.3	4.9	4.8	6.8	6.4	7.7	4.8
	2003	5	12	132	4.1	4.3	4.8	5	4	4	7.2	6.4	8.1	4.2
	2003	5	13	133	4.7	5.1	5.7	5.4	5.1	4.9	7.2	6.8	8.2	5
	2003	5	14	134	3.5	3.7	3.9	3	2.8	4.2	7.2	5.8	8	3.9
	2003	5	15	135	4.5	5.2	5.5	4.1	5.3	6.5	6.8	6.5	7.2	5.1
	2003	5	16	136	3.4	3.8	4.1	3.3	3.4	4.5	6.2	5.7	8.7	3.6
	2003	5	17	137	4.1	4.3	4.8	5	4.3	3.9	6.1	6.2	9	4.2
	2003	5	18	138	4.4	5	5.7	5	5.5	6	6.6	5.7	5.1	4.6
	2003	5	19	139	4.3	4.7	5.3	5	4.9	5.3	6.6	5.9	5.6	4.5
	2003	5	20	140	4.4	4.9	5.6	5.2	5.3	5.4	6.7	6.2	7.1	4.6
	2003	5	21	141	3.1	3.6	3.8	3	2.9	4.1	6.7	5.7	9	3.4
	2003	5	22	142	3.5	4	4.4	3.6	3.7	5.2	7	5.4	7	3.7
	2003	5	23	143	4.6	5.2	5.4	4.1	5.2	5.7	6.6	6.3	5.5	5.2
	2003	5	24	144	4.6	5.3	6	5.1	5.9	6.8	6.9	6.5	4.9	4.9
	2003	5	25	145	4.5	5.5	5.8	4.9	6.4	6.8	6.8	5.8	5.7	4.8
	2003	5	26	146	4.9	5.4	5.9	4.9	6.2	6.2	6	5.9	7	5.3
	2003	5	27	147	4.6	5.1	5.7	4.9	5.6	5.3	6	5.9	7.3	5
	2003	5	28	148	4.1	4.5	5	4.3	4.6	4.9	6.2	5.9	7.2	4.5
	2003	5	29	149	4.4	4.8	5.3	4.6	5	5.3	6.1	6.5	6.9	4.7
	2003	5	30	150	2.6	3.1	3.2	2.4	2	3.5	6.1	4.6	6.5	2.8
	2003	5	31	151	2.4	3	3	2.3	2	2.9	4.8	3.3	5.5	2.7
	2003	6	1	152	3.7	4.1	4.6	4.1	4.2	4.5	5.1	5.4	3.5	3.9
	2003	6	2	153	4	4.5	5.1	4.3	4.7	5.6	5.9	5.2	5.1	4.2
	2003	6	3	154	4.1	4.8	5.3	4.5	5.3	5.6	5.8	5.4	4.7	4.4
	2003	6	4	155	4.6	5.1	5.6	5.2	5.7	5	6	6.2	6.8	4.8
	2003	6	5	156	5.2	6.1	6.5	5.3	7.4	8	6.7	5.4	5.7	5.6
	2003	6	6	157	5.1	5.6	6.2	5	6.4	6.8	6.3	6.2	7.8	5.5
	2003	6	7	158	5.4	5.8	6.4	5.5	6.1	6	7.5	6.8	7.8	5.9
	2003	6	8	159	5.3	5.5	6.4	5.5	5.4	6.5	8.4	7.2	8.8	5.8
	2003	6	9	160	5	5.3	6	5.4	5.1	6.2	8.9	6.8	9.3	5.4
	2003	6	10	161	5.5	5.8	6.6	5.3	6	7.2	7.9	6.9	7.8	6
	2003	6	11	162	5.1	5.5	6.2	5.5	5.7	5.9	7.5	6.5	9.4	5.4
	2003	6	12	163	5.3	5.5	6.5	5.3	5.7	6.2	7	6.3	8.1	5.8
	2003	6	13	164	5.2	5.6	6.4	5.1	5.7	7	8.2	7.2	7.7	5.7
	2003	6	14	165	5.1	5.6	6.5	5.4	6.2	7.5	7.8	7.8	8.1	5.5
	2003	6	15	166	5.1	5.9	6.5	5.3	6.3	8.1	9.2	7.4	8.4	5.5
	2003	6	16	167	5.5	6.2	6.5	5.2	6.4	7.6	9.5	7.2	7.6	6
	2003	6	17	168	5.9	6.1	6.7	4.5	5.7	8	9.1	7.5	7.9	6.8
	2003	6	18	169	5.9	6.3	6.8	5	6.6	7.9	8.1	7.4	7	6.7
	2003	6	19	170	7.2	7.2	8	5.3	7.3	9.4	8.9	7.2	7.7	8.4
	2003	6	20	171	6.6	6.8	7.4	5.2	6.9	8.6	8.8	7.5	7.5	7.7
	2003	6	21	172	6.1	6.5	6.8	5	6.7	8.1	9	7.3	8.1	6.9
	2003	6	22	173	5.9	6.4	6.6	4.3	6	8.3	9	7.3	7.7	6.9
	2003	6	23	174	5	6.1	6.3	5.2	7.3	8.3	7.7	7.5	7.9	5.5
	2003	6	24	175	5.7	6.6	6.7	5	7.7	8.7	7.9	5.7	9.5	6.4
	2003	6	25	176	5.9	6.5	6.9	5.4	7.6	8.3	7.6	7.3	12.3	6.6
	2003	6	26	177	6.9	7.2	7.5	5.2	7.7	9.4	9.1	7.2	9.2	8
	2003	6	27	178	6.5	6.9	7.3	5	7.2	9.5	9.2	7.4	8.8	7.5
	2003	6	28	179	5.8	6.7	6.8	5.1	7.5	9.2	9.1	6.9	9.8	6.5
	2003	6	29	180	6.5	7	7.4	5.2	7.5	9.4	9.1	6.6	9	7.5
	2003	6	30	181	5.9	6.5	7	5.6	7.4	8.4	8.4	6.7	9.7	6.5
	2003	7	1	182	6.4	6.8	7.4	5.2	7.3	9.2	8.7	7.1	8.2	7.3
	2003	7	2	183	6.6	6.9	7.6	5.7	7.2	8.7	9.5	7.8	7.8	7.5
	2003	7	3	184	6.6	6.8	7.4	5.4	6.9	8.4	9.5	7.9	8	7.5
	2003	7	4	185	7.1	7.3	8	5.6	7.4	10.1	10.7	8.5	7.8	8.2
	2003	7	5	186	6.2	6.8	7.7	6	7	9.8	11.5	8.2	8.8	6.8
	2003	7	6	187	6	6.7	7.4	5.5	7	9.8	11.3	8.2	9	6.7
	2003	7	7	188	6.4	6.6	7.5	5.8	6.4	8.2	10.4	7.7	9.8	7.2
	2003	7	8	189	8	8	8.1	4.9	8	10.5	9.4	6.8	7.5	9.5
	2003	7	9	190	6.2	6.8	6.9	4.6	7.4	9.2	8.6	7.3	5.5	7.1
	2003	7	10	191	5.1	6	6.2	4.6	6.4	8.2	9	7.1	7.4	5.6
	2003	7	11	192	6.9	7.2	8	5.4	7.5	10.1	9.7	6.9	8.7	8
	2003	7	12	193	7.2	7.3	7.8	5.2	7.4	9.7	10	7.9	10.1	8.3
	2003	7	13	194	6.2	6.7	7.2	5.6	7.1	8.6	9.7	7.5	9.7	7
	2003	7	14	195	6.2	6.4	7.5	6.2	6.4	7.8	9.9	7.6	11.9	6.8
	2003	7	15	196	7.4	7.3	8.2	5.8	7.1	8.8	10.2	8.2	8.4	8.5
	2003	7	16	197	8.1	7.9	8.1	5.1	7.6	10.2	10.6	8.4	8.9	9.6
	2003	7	17	198	7.8	7.8	8	5.1	7.9	10.3	10.2	7.4	9.4	9.2
	2003	7	18	199	6.7	7.2	7.4	5	7.7	9.7	9.6	6.3	10	7.8
	2003	7	19	200	5.9	6.7	6.8	4.9	7.5	9	9.1	6.8	10	6.6
	2003	7	20	201	5.2	6.3	6.4	5.1	7.2	8.6	9.3	7	9.4	5.7
	2003	7	21	202	5.4	6.3	6.3	5.3	7	7.5	9.1	7.4	9.5	5.9
	2003	7	22	203	5.8	6.5	7.1	5.4	7.1	9.1	9.7	7	10	6.4
	2003	7	23	204	6.1	6.7	7	4.9	7.3	9.2	9.1	6.7	10.2	7
	2003	7	24	205	4.9	6	6	4.5	6.5	8.2	8.9	6.8	9.8	5.3
	2003	7	25	206	5.3	6.3	6.7	5.2	7.2	9	9.1	6.2	10.6	5.8
	2003	7	26	207	5.2	6.3	6.5	4.9	7.3	8.8	8.7	6.6	10.4	5.8
	2003	7	27	208	5.1	6.1	6.4	5	7	8.6	9	6.6	10.4	5.5
	2003	7	28	209	5.9	6.5	6.8	4.7	6.9	8.8	8.8	6.7	7.8	6.8
	2003	7	29	210	5.6	6.4	6.4	4.5	7.2	8.7	8.2	6.3	6.3	6.3
	2003	7	30	211	4.9	6	6.3	4.8	6.9	8.5	8.2	6.4	6.3	5.4
	2003	7	31	212	4.7	6	6	4.8	6.9	8.3	9.2	6.5	7.5	5
	2003	8	1	213	4.7	5.9	6	4.9	6.7	8.2	9.2	7.1	8.5	5
	2003	8	2	214	5.6	6.1	6.9	5.5	6.3	8.2	9.8	7.3	9.1	6.1
	2003	8	3	215	6.6	6.7	7.5	5.3	6.6	9.1	10.4	7.6	8.8	7.5
	2003	8	4	216	6.4	6.7	7.5	5.2	6.5	9.4	10.7	6.9	9.4	7.3
	2003	8	5	217	5.8	6.4	7.2	5.5	6.4	8.8	10.8	7.2	10.3	6.5
	2003	8	6	218	5.4	5.8	6.6	5.6	5.7	7	10	6.9	11.4	5.8
	2003	8	7	219	5.9	6.1	7	5.7	5.8	7.4	9.8	6.9	11.7	6.4
	2003	8	8	220	5.3	5.8	6.6	5.7	5.7	7.3	10.1	6.8	11.1	5.7
	2003	8	9	221	5.4	5.8	6.6	5.2	5.9	7.8	9.2	7.2	10.1	6
	2003	8	10	222	5.2	5.8	6.4	5	6.1	7.9	9.2	7	9.5	5.7
	2003	8	11	223	5.3	6.1	6.7	5.1	6.6	8.5	9.2	6.5	8.4	5.9
	2003	8	12	224	4.8	5.5	6.1	4.9	6	7.5	8.4	6.9	8.9	5.2
	2003	8	13	225	5.1	5.6	6.4	5.8	5.6	6.9	8.9	6.1	10.6	5.4
	2003	8	14	226	5.2	5.7	6.6	5.3	6.1	7.8	8.5	6.5	10.3	5.6
	2003	8	15	227	4.9	5.4	6.2	5.4	5.7	7.4	8.4	6.3	10.7	5.2
	2003	8	16	228	5	5.4	6.1	5.5	5.3	6.5	8.6	7	9	5.3
	2003	8	17	229	5.4	5.7	6.5	5.3	5.6	7.1	9	7.1	7.7	6
	2003	8	18	230	5.5	5.6	6.5	5.5	5.3	7.1	9.8	7.2	8.3	6
	2003	8	19	231	5.2	5.4	6.1	5.6	4.9	6.4	10.1	6.8	9.2	5.5
	2003	8	20	232	4.9	5.1	5.6	6.1	4.3	4.6	10.2	7	10.2	5
	2003	8	21	233	4.6	5.1	5.7	5.1	4.9	6.7	9.3	6.6	9.3	4.9
	2003	8	22	234	4.2	4.6	5.2	4.6	4.5	5.9	8	6.3	9.7	4.5
	2003	8	23	235	5.1	5.5	6.1	4.8	5.4	6.8	9.2	6.2	7.5	5.6
	2003	8	24	236	4.9	5.3	5.9	4.9	5.2	6.2	8.7	6.1	8.1	5.3
	2003	8	25	237	4.4	4.8	5.3	5.1	4.6	5.6	8.3	6.1	9.1	4.6
	2003	8	26	238	4.3	4.6	5.1	4.8	4.6	5.5	7.5	6.2	7.3	4.5
	2003	8	27	239	4.2	4.5	5	4.8	4.4	5.1	7.5	6.3	7.2	4.4
	2003	8	28	240	4.1	4.5	4.9	4.9	4.4	4.9	7.4	6	7.2	4.3
	2003	8	29	241	4.2	4.6	5.1	4.8	4.5	5.5	8	6.2	8.4	4.4
	2003	8	30	242	4.8	5.1	5.7	5.4	4.8	6.1	9.1	6.8	7	5
	2003	8	31	243	4.5	5	5.5	5.2	4.8	6	9	6.3	7.1	4.7
	2003	9	1	244	4.5	5.2	5.6	4.5	5.5	6.6	8.3	6.2	7.2	4.8
	2003	9	2	245	4.3	5.1	5.5	4.6	5.3	6.8	8.5	6.4	6.8	4.7
	2003	9	3	246	4.5	5.1	5.5	4.5	5.2	6.4	8.5	6.5	7.2	4.9
	2003	9	4	247	4.5	4.9	5.5	4.9	5	6.2	8.2	6.3	7.5	4.7
	2003	9	5	248	3.8	4.2	4.6	4	4.1	5	6.6	5.3	7.1	4.1
	2003	9	6	249	3.9	4.3	4.9	4.4	4.7	5.1	5.7	4.3	6.3	4.1
	2003	9	7	250	3.9	4.2	4.8	4.2	4.6	4.7	5.1	4.5	6.1	4.2
	2003	9	8	251	3.7	3.9	4.4	4.4	4.1	3.7	5.1	4.8	7.5	3.9
	2003	9	9	252	3.7	3.9	4.3	4.4	3.9	3.7	5.6	5.2	8	3.9
	2003	9	10	253	3.8	4.1	4.5	4.3	4	4.4	6.5	5.4	7.7	4
	2003	9	11	254	3.8	4.1	4.5	4.4	4	4.5	7	5.6	8.2	4
	2003	9	12	255	3.4	3.7	4	4	3.6	4	6.4	4.8	7.8	3.5
	2003	9	13	256	3.4	3.9	4.3	3.5	3.9	5.5	6.3	5.1	5.9	3.7
	2003	9	14	257	4.1	4.8	5	3.4	5.2	6.2	6.1	4.6	5.6	4.7
	2003	9	15	258	3.2	4.4	4.4	3.3	5.2	6.1	6.3	5.1	5.2	3.5
	2003	9	16	259	3.5	4.6	4.7	3.1	5.3	6.9	6.6	5.3	4.7	4
	2003	9	17	260	4.5	5	5.2	2.9	5.2	7	6.2	5.3	4.9	5.4
	2003	9	18	261	2.8	4.2	4	2.8	5.4	5.9	5.3	4.2	4.5	3
	2003	9	19	262	3	4.1	4.2	3.1	5.1	5.8	5.2	4.1	4.9	3.2
	2003	9	20	263	3	3.9	4.1	2.9	4.5	5.3	5	4.2	5.5	3.3
	2003	9	21	264	2.8	3.8	3.9	2.9	4	5	5.5	4.3	5.2	3
	2003	9	22	265	3.2	4	4.3	3.3	4.6	5.5	5.6	4.1	5.9	3.4
	2003	9	23	266	3.4	3.9	4.3	3.4	4.2	5.2	5.9	4.4	6.4	3.7
	2003	9	24	267	3.6	3.7	4.1	3.7	3.7	4.5	6.1	4.6	7.1	3.9
	2003	9	25	268	3.5	3.9	4.3	3.5	4	5.2	6.3	4.5	9	3.8
	2003	9	26	269	3	3.7	4	3.4	3.9	5.1	6.2	4.6	7.4	3.2
	2003	9	27	270	3	3.8	4.1	3.4	4.1	5.5	6.2	4.5	6	3.2
	2003	9	28	271	2.8	3.9	4	2.9	4.4	5.7	5.9	4.4	4.7	3.1
	2003	9	29	272	2.9	4.1	4.1	2.7	4.6	6.1	6.1	3.9	5.5	3.3
	2003	9	30	273	3	3.8	4.1	3	4.4	5.5	5.6	4.2	6.5	3.3
	2003	10	1	274	2.7	3.3	3.6	2.7	3.6	4.2	4.7	3.7	4.2	3
	2003	10	2	275	2.3	3	3.2	2.5	3.1	3.7	4.6	3.4	4.4	2.5
	2003	10	3	276	2.2	2.9	2.9	2.2	2.9	3.4	3.9	3	2.8	2.3
	2003	10	4	277	2.6	3.2	3.4	2.7	3.8	4	4.1	3.6	1.8	2.8
	2003	10	5	278	2.7	3	3.3	3	3.3	3.6	4.6	3.7	4.3	2.9
	2003	10	6	279	2.8	3	3.2	3.2	3	3.5	5.4	4.3	4.8	2.9
	2003	10	7	280	2.9	3.4	3.7	3.2	3.6	4.8	5.9	4.5	5.7	3.1
	2003	10	8	281	2.6	3.2	3.4	3	3.4	4.6	5.7	4	5.8	2.7
	2003	10	9	282	2.5	3.1	3.3	2.7	3.3	4.2	5.2	3.8	5.3	2.7
	2003	10	10	283	2.8	3.1	3.4	2.7	3.1	3.9	5.3	3.8	4.3	3.1
	2003	10	11	284	2.6	2.9	3.1	2.7	3	3.7	5.1	3.6	6.5	2.7
	2003	10	12	285	2.5	2.9	3.2	2.7	3.2	4	4.6	3.6	5.5	2.7
	2003	10	13	286	2.4	2.8	3	2.7	3.1	3.5	4.3	3.5	3.7	2.6
	2003	10	14	287	2.5	2.7	2.9	2.8	2.8	3.2	4.8	3.5	4.4	2.6
	2003	10	15	288	2.4	2.6	2.8	2.4	2.4	3.3	5.1	3.3	5.7	2.7
	2003	10	16	289	2.9	3.1	3.4	2.4	2.8	4.3	5.3	3.5	5.7	3.3
	2003	10	17	290	3.1	3.7	3.8	1.8	3.4	4.8	4.7	3.1	4.7	3.8
	2003	10	18	291	2.1	3	3.1	1.9	3.3	4.2	4	2.9	4.7	2.4
	2003	10	19	292	2.5	3.1	3.3	2	3.3	4.3	4.2	3.2	3	2.8
	2003	10	20	293	2.2	2.4	2.5	2.5	2.4	2.7	4.3	3.3	4.4	2.4
	2003	10	21	294	2	2.4	2.5	2.2	2.5	3.1	4.3	3.4	4.3	2
	2003	10	22	295	2.1	2.7	2.9	2.3	3	4.3	4.7	3.5	3.2	2.2
	2003	10	23	296	1.9	2.8	2.9	2	3.1	4.4	4.6	3.3	2.5	2
	2003	10	24	297	1.8	2.4	2.5	1.7	2	3.2	4.4	3.1	3.2	2
	2003	10	25	298	2	2.8	2.9	2.2	3	4.4	5.1	3.1	3.9	2.1
	2003	10	26	299	2.2	2.8	2.9	1.9	2.8	4	4.6	3	4	2.4
	2003	10	27	300	2.4	2.9	3.2	1.6	3	4.2	3.9	2.5	4.1	2.8
	2003	10	28	301	1.3	2	2	1	0.4	1.4	3.2	2.1	3.2	1.5
	2003	10	29	302	1.4	2	2	1.4	2.6	2.2	1.8	1.6	2.3	1.5
	2003	10	30	303	1.2	1.3	1.3	1.5	1.6	0.7	1.6	1.8	2.7	1.2
	2003	10	31	304	1	1.4	1.4	0.9	0.3	0.9	1.6	1.2	2.2	1.1
	2003	11	1	305	1.8	2.2	2.3	1.3	2.2	2.6	2.4	1.9	-999	2
	2003	11	2	306	1.7	2.1	2.3	1.4	2.2	2.8	2.7	2.4	-999	2
	2003	11	3	307	2.3	2.3	2.6	1.6	2.5	3.4	3.3	2.7	-999	2.7
	2003	11	4	308	1.8	2.2	2.4	1.5	2.5	3	3.1	2.4	-999	2.1
	2003	11	5	309	1.4	1.7	1.8	1.6	1.9	2.2	3.3	2.4	-999	1.5
	2003	11	6	310	1.3	1.7	1.7	1.3	1.5	2.3	3.4	2.3	-999	1.4
	2003	11	7	311	1.7	1.9	2	1.6	1.8	2.4	3.7	2.2	-999	1.9
	2003	11	8	312	1.1	1.3	1.4	1.1	0.7	1.3	3.4	1.9	-999	1.2
	2003	11	9	313	0.8	0.9	0.9	0.8	0.2	0.5	2.4	1.3	-999	0.9
	2003	11	10	314	0.9	1.3	1.3	0.9	0.3	1	2.4	1.5	-999	1
	2003	11	11	315	1.2	1.3	1.4	0.9	0.4	1	2.1	1.1	-999	1.4
	2003	11	12	316	1.4	1.8	2	1	2	2.4	1.8	1.4	-999	1.7
	2003	11	13	317	1	1.4	1.4	1	1.5	1.6	1.8	1.5	-999	1.1
	2003	11	14	318	1	1.3	1.3	1.1	1.7	1.3	1.6	1.5	-999	1
	2003	11	15	319	1.1	1.4	1.4	1.1	1.8	1.7	1.7	1.7	-999	1.1
	2003	11	16	320	0.9	1.3	1.4	1.1	1.8	1.7	1.8	1.6	-999	1
	2003	11	17	321	1	1.4	1.4	1	1.8	1.9	1.9	1.7	-999	1.1
	2003	11	18	322	0.9	1.4	1.4	1	1.8	2	2	1.8	-999	1
	2003	11	19	323	0.7	0.9	0.9	0.8	0.5	0.6	1.6	1.4	-999	0.7
	2003	11	20	324	1	1.2	1.3	1	1.7	1.1	1.7	1.6	-999	1.1
	2003	11	21	325	1.1	1.3	1.4	1	1.7	1.2	1.9	1.9	-999	1.2
	2003	11	22	326	1.1	1.5	1.6	0.9	1.8	1.8	2	1.8	-999	1.3
	2003	11	23	327	1.1	1.8	1.9	0.7	2	2.6	2	1.7	-999	1.4
	2003	11	24	328	0.9	1.7	1.7	0.7	1.4	2.1	2.1	1.6	-999	1.1
	2003	11	25	329	0.9	1.5	1.5	0.8	0	0.6	1.6	1	-999	1
	2003	11	26	330	1	1.7	1.7	0.7	0.3	0.9	1.6	1	-999	1.2
	2003	11	27	331	0.8	1.6	1.6	0.7	1.5	2	1.8	1	-999	0.9
	2003	11	28	332	0.8	1.2	1.2	0.8	1.1	1	1.8	1.3	-999	0.9
	2003	11	29	333	1.3	1.7	1.9	0.6	1.8	2.3	1.9	1.5	-999	1.5
	2003	11	30	334	0.9	1.5	1.5	0.7	1.3	1.7	1.7	1.2	-999	1.1
	2003	12	1	335	1.3	1.8	1.9	0.6	1.1	1.4	1.5	0.8	-999	1.6
	2003	12	2	336	1.4	1.7	1.9	0.5	1.8	2.2	1.7	1.3	-999	1.7
	2003	12	3	337	1.1	1.5	1.6	0.5	1.4	1.5	1.2	1	-999	1.3
	2003	12	4	338	1	1.3	1.3	0.6	1.2	1.1	1.4	1.3	-999	1.2
	2003	12	5	339	1	1.1	1.2	0.8	1.2	1	1.6	1.4	-999	1.2
	2003	12	6	340	1.5	1.5	1.7	0.7	1.5	1.6	1.7	1.3	-999	1.8
	2003	12	7	341	0.7	0.9	0.9	0.6	0.2	0.2	1.1	0.8	-999	0.8
	2003	12	8	342	0.7	1.1	1.1	0.7	-0.1	0.4	1.4	0.7	-999	0.8
	2003	12	9	343	0.6	1	1	0.7	0.2	0.5	1.5	0.9	-999	0.7
	2003	12	10	344	0.7	1	1	0.7	1	0.8	1.6	1.2	-999	0.8
	2003	12	11	345	0.7	1	1	0.6	1.3	0.8	1.4	1.2	-999	0.7
	2003	12	12	346	0.7	0.9	1	0.6	1.3	0.8	1.3	1.2	-999	0.8
	2003	12	13	347	0.7	1	1	0.6	1	0.6	1.3	1.2	-999	0.8
	2003	12	14	348	0.8	1	1	0.6	0.9	0.6	1.2	1	-999	0.9
	2003	12	15	349	0.6	0.8	0.8	0.6	-0.2	0.1	1.1	0.8	-999	0.6
	2003	12	16	350	0.6	1	1	0.6	-0.2	0.2	1.3	0.6	-999	0.7
	2003	12	17	351	1.5	2	2	0.8	-0.2	0.3	1.5	0.8	-999	1.8
	2003	12	18	352	1.4	1.7	1.8	0.7	0	0.4	1.2	0.9	-999	1.7
	2003	12	19	353	1.6	1.9	2	0.5	0.8	1	0.9	0.7	-999	2.1
	2003	12	20	354	0.7	1.2	1.2	0.4	1.4	1.1	0.9	0.9	-999	0.9
	2003	12	21	355	0.6	1.2	1.2	0.4	1.4	1.2	0.9	0.9	-999	0.8
	2003	12	22	356	0.7	1.2	1.2	0.4	1.1	0.8	0.8	0.9	-999	0.9
	2003	12	23	357	0.6	1.2	1.2	0.5	0.9	0.9	1	0.8	-999	0.7
	2003	12	24	358	0.6	1.1	1.1	0.4	1.3	1.1	0.9	1	-999	0.7
	2003	12	25	359	0.5	1.2	1.2	0.4	1.3	1.3	1.2	1.1	-999	0.6
	2003	12	26	360	0.8	1.4	1.3	0.7	-0.1	0.3	1	0.5	-999	0.9
	2003	12	27	361	0.7	1.3	1.3	0.6	0.2	0.4	0.9	0.5	-999	0.8
	2003	12	28	362	0.7	1.2	1.2	0.5	0.9	1	1.1	0.7	-999	0.7
	2003	12	29	363	0.9	1.4	1.5	0.5	1.2	1.4	1.2	1	-999	1.1
	2003	12	30	364	0.7	1.4	1.4	0.4	1.4	1.4	1.2	1.1	-999	0.9
	2003	12	31	365	0.7	1.3	1.3	0.4	1.4	1.3	1.2	1.1	-999	0.9
	2004	1	1	1	0.7	1.1	1.1	0.6	0.6	0.7	1.2	0.9	-999	0.8
	2004	1	2	2	0.7	0.9	0.9	0.6	0.5	0.5	1.1	0.9	-999	0.8
	2004	1	3	3	0.7	1	1	0.7	1	1	1.4	1	-999	0.7
	2004	1	4	4	1.4	1.5	1.7	0.7	-0.1	0.4	1.3	0.7	-999	1.7
	2004	1	5	5	0.9	1	1.1	0.6	0	0.3	1.3	0.8	-999	1
	2004	1	6	6	0.5	0.6	0.6	0.6	0.1	0.1	1.1	0.7	-999	0.5
	2004	1	8	8	0.6	0.9	1	0.5	1.3	0.6	0.8	0.6	-999	0.7
	2004	1	9	9	0.5	0.7	0.7	0.5	0	-0.1	0.4	0.4	-999	0.5
	2004	1	10	10	0.6	0.9	0.9	0.5	0.9	0.3	0.5	0.6	-999	0.6
	2004	1	11	11	0.7	1.1	1.1	0.6	0	0.1	0.7	0.8	0.2	0.8
	2004	1	13	13	0.7	1.1	1	0.7	1.3	0.9	1.4	1.2	-999	0.7
	2004	1	14	14	0.7	1	1	0.6	0.7	0.4	0.9	0.7	-999	0.7
	2004	1	15	15	0.7	1.1	1.1	0.7	0.5	0.6	1.2	0.8	-999	0.8
	2004	1	16	16	0.9	1.2	1.3	0.7	-0.2	0.2	1.2	0.6	-999	1
	2004	1	17	17	0.8	1.1	1.2	0.7	0.2	0.4	1.1	0.9	2	1
	2004	1	18	18	0.8	1.2	1.2	0.7	1.5	1.1	1.1	1.2	-999	0.9
	2004	1	19	19	0.7	1.1	1.1	0.7	1.6	1	1.1	1.3	-999	0.7
	2004	1	20	20	0.9	1	1.1	0.9	1.4	0.8	1.1	1.4	-999	1
	2004	1	21	21	0.7	0.8	0.9	0.8	0.7	0.3	1	1.1	-999	0.8
	2004	1	22	22	0.6	0.8	0.8	0.6	-0.2	0.1	1	0.9	-999	0.6
	2004	1	23	23	0.6	0.9	0.9	0.7	0.2	0.2	1.1	0.8	-999	0.6
	2004	1	25	25	0.7	0.9	0.9	0.7	0.6	0.3	1	1	-999	0.7
	2004	1	26	26	0.6	0.9	0.9	0.7	0	0.2	1.1	0.6	-999	0.7
	2004	1	27	27	0.6	0.9	0.9	0.6	0	0.2	1	0.6	-999	0.6
	2004	1	28	28	0.8	1.1	1.1	0.9	1.1	0.5	1.2	1	-999	0.9
	2004	1	29	29	1.7	1.8	2	0.9	1.7	1.4	1.2	1.4	-999	2.1
	2004	1	30	30	1	1.3	1.4	0.9	1.3	0.9	1.2	1.2	-999	1.1
	2004	2	2	33	1.5	1.7	1.9	1.1	2.1	1.6	1.4	1.4	-999	1.8
	2004	2	5	36	1.2	1.5	1.5	1	1.3	0.9	1.4	1.2	-999	1.3
	2004	2	10	41	1	1.4	1.4	0.9	0.6	0.8	1.7	1.4	-999	1.1
	2004	2	11	42	1	1.3	1.3	1.2	1	0.9	1.9	1.5	-999	1.1
	2004	2	12	43	1.2	1.4	1.5	1	1.1	1	1.2	1.5	-999	1.3
	2004	2	13	44	1.2	1.4	1.5	0.7	-0.1	0.4	1.5	1.3	-999	1.4
	2004	2	14	45	0.9	1.2	1.2	0.7	-0.1	0.2	1	1.3	-999	1
	2004	2	15	46	1.2	1.5	1.6	1.2	1.9	0.5	0.5	0.9	-999	1.3
	2004	2	19	50	1	1.4	1.3	1	1	0.6	0.9	1.2	-999	1.1
	2004	2	21	52	1	1.3	1.3	0.7	0.1	0.3	0.9	1.3	-999	1.2
	2004	2	22	53	1.2	1.4	1.5	1.1	1.4	0.3	0.5	0.9	-999	1.3
	2004	2	23	54	1.1	1.4	1.5	1.1	1.4	0.4	0.6	1.1	-999	1.2
	2004	2	24	55	0.7	1	1	0.7	0.2	0.2	0.7	0.8	-999	0.8
	2004	2	25	56	1.1	1.4	1.4	1.1	0.9	0.9	1.1	1.5	-999	1.1
	2004	2	26	57	1.5	1.9	2	1.8	2.3	1.8	1.6	1.9	-999	1.6
	2004	2	27	58	1.9	2.4	2.5	1.8	2.7	2.2	2.1	2.5	-999	2.1
	2004	2	29	60	2.1	2.5	2.6	1.5	1.9	2.2	2.7	2.5	-999	2.5
	2004	3	1	60	2.6	3	3.2	2	3.1	3.2	3.2	2.6	-999	3
	2004	3	2	61	1.8	2.2	2.2	1.4	1.4	1.7	2.7	2.2	-999	2.1
	2004	3	3	62	1.9	2.4	2.4	1.6	1.8	2	3.2	2.6	-999	2.1
	2004	3	4	63	2.6	2.8	2.9	1.4	1.4	2.3	3.2	2.5	-999	3.1
	2004	3	5	64	2.7	3	3.1	1.3	1	2	2.9	1.9	-999	3.4
	2004	3	6	65	2	2.5	2.6	1.5	1.8	2.2	2.4	2	-999	2.3
	2004	3	7	66	2	2.6	2.7	1.9	3.1	2.3	1.7	1.8	-999	2.2
	2004	3	8	67	1.9	2.5	2.6	2	3.4	2.3	1.4	2	-999	2.1
	2004	3	9	68	2.1	2.6	2.7	2.1	3.4	2.5	1.8	2.6	-999	2.2
	2004	3	10	69	2.2	2.7	2.8	2.3	3.2	2.2	2.1	2.7	-999	2.4
	2004	3	11	70	1.9	2.3	2.4	2	2.4	1.9	2.1	2.6	-999	2.1
	2004	3	12	71	2.4	2.7	3	2.1	2.8	2.5	1.9	2.4	-999	2.8
	2004	3	13	72	2.4	2.9	3.1	2.3	3.5	2.8	2	2.6	-999	2.7
	2004	3	14	73	2.4	2.8	3.1	2.3	3.6	2.9	1.8	2.5	-999	2.7
	2004	3	15	74	2.9	3.2	3.6	2.4	3.8	3.2	1.7	2.3	-999	3.3
	2004	3	16	75	2.2	2.5	2.7	2.2	2.7	1.9	2	2.8	-999	2.4
	2004	3	17	76	2.5	2.7	2.9	1.8	2.3	2.3	2	2.7	-999	2.9
	2004	3	18	77	2.5	2.8	3.2	2.4	3.2	2.9	2	2.7	-999	2.9
	2004	3	19	78	2.2	2.6	2.9	2.2	2.7	2.7	2.3	2.4	-999	2.4
	2004	3	20	79	2.7	3	3.4	2.8	3.8	3.4	2.4	3.3	-999	2.9
	2004	3	21	80	2.8	3.2	3.6	3	3.9	3.7	2.9	3.6	-999	3.1
	2004	3	22	81	3	3.3	3.7	3	4	3.7	3.2	3.8	-999	3.3
	2004	3	23	82	3.8	3.9	4.6	3.2	4.4	4.8	3.5	3.9	-999	4.4
	2004	3	24	83	3.3	3.4	3.9	2.8	3.5	4.1	3.6	3.7	-999	3.8
	2004	3	25	84	3.2	3.6	4	3.3	4.1	4.2	3.9	4.1	-999	3.5
	2004	3	26	85	2.9	3.1	3.4	2.8	3.2	3.3	3.3	3.7	-999	3.1
	2004	3	27	86	2.3	2.5	2.6	2.5	2.3	2.2	3.7	3.8	-999	2.4
	2004	3	28	87	3.1	3.3	3.6	2.7	3	3.5	4	4.2	-999	3.5
	2004	3	29	88	2.1	2.3	2.5	1.5	1	2.1	3.9	3.6	-999	2.4
	2004	3	30	89	3.1	3.6	4	3.4	4.1	4.1	3.9	3.6	-999	3.3
	2004	3	31	90	3.1	3.4	3.9	3.2	4.1	3.7	2.7	3.5	-999	3.4
	2004	4	1	91	2.8	3.2	3.6	3	3.7	3.2	2.8	3.5	2.8	3.1
	2004	4	2	92	2.3	2.5	2.7	2	1.9	2.2	2.6	2.8	3.9	2.6
	2004	4	3	93	3	3.5	4	3.4	4.5	3.6	2.5	2.9	2.5	3.2
	2004	4	4	94	2.7	3.2	3.8	3.2	4.2	2.8	1.5	1.9	3.5	2.9
	2004	4	5	95	2.9	3.2	3.7	3.1	4.1	2.7	1.6	3.2	2	3.1
	2004	4	6	96	3	3.4	3.8	3	4	3.6	2.3	3.5	3.4	3.3
	2004	4	7	97	3.4	3.9	4.3	3.4	4.9	4.4	3	4.1	3.7	3.8
	2004	4	8	98	3.4	3.8	4.1	3.6	4.4	3.5	3.5	4.3	4	3.6
	2004	4	9	99	3.4	3.9	4.2	3.8	4.6	3.8	4.1	4.6	5.3	3.6
	2004	4	10	100	3.8	4.5	4.8	3.8	5.4	5.1	4.6	4.7	5.4	4.1
	2004	4	11	101	4.4	4.8	5.2	3.8	5.3	5.4	5	5.1	6.2	5
	2004	4	12	102	3.9	4.6	5	3.9	5.4	5.6	5.3	5.1	6.3	4.3
	2004	4	13	103	3.8	4.4	4.8	3.8	4.7	5.6	5.8	5.6	6.5	4.2
	2004	4	14	104	4.6	4.8	5.3	3.9	4.9	5.8	6	5.7	4.9	5.2
	2004	4	15	105	4.1	4.4	5.2	4.2	4.9	5	4.7	4.1	6.1	4.5
	2004	4	16	106	2	2.3	2.4	2.1	1.9	1.7	2.5	2.8	5.5	2.1
	2004	4	17	107	3.5	3.9	4.4	3.5	4.5	3.7	3	3.9	3.7	3.9
	2004	4	19	109	2.6	3	3.2	2.7	2.8	2.4	3.3	3.7	6.3	2.8
	2004	4	20	110	3.1	3.6	4	3.6	4.1	3.4	3.3	3.8	4.3	3.3
	2004	4	21	111	2	2.5	2.5	2.1	1.8	2.1	3.4	3.5	4.5	2.1
	2004	4	22	112	3	3.5	3.8	3	3.7	3.6	3.3	4	2.4	3.3
	2004	4	23	113	3.5	3.6	4.2	2.7	3.2	4	3.1	3.5	3.7	4.2
	2004	4	24	114	3.2	3.7	4.2	3.3	4.1	4.4	3.2	3.9	3.2	3.5
	2004	4	25	115	3.5	4.2	4.6	3.6	4.9	4.7	3.7	4.2	3.1	3.8
	2004	4	26	116	3.6	4.4	4.7	3.8	5.2	5	4	4.5	3.7	3.9
	2004	4	27	117	3	3.8	4	3.1	3.8	4.5	5	5.1	4.1	3.2
	2004	4	28	118	4.3	4.9	5.5	4.2	5.8	6.4	4.8	4.9	6.3	4.8
	2004	4	29	119	4.3	4.4	4.8	2.9	3.7	4.9	4.5	4.2	4.6	5.1
	2004	4	30	120	3.9	4.5	4.9	3.7	5.3	5.3	3.7	4.1	3.7	4.3
	2004	5	1	121	3.6	4.2	4.7	3.8	4.7	4.9	3.9	4.6	2.8	3.9
	2004	5	2	122	2.9	3.5	3.7	2.8	3.1	3.9	4.2	4.1	3.2	3.1
	2004	5	3	123	2.4	2.9	3	1.8	1.5	2.6	3.7	3.4	2.3	2.8
	2004	5	4	124	3.2	3.9	4	3	3.6	4	4.2	4.3	1.8	3.6
	2004	5	5	125	3.7	4.7	4.9	4.2	5.8	5.6	4.7	4.8	1.6	3.9
	2004	5	6	126	2.8	3.6	3.6	2.7	3	3.7	4.8	4.5	3.9	3
	2004	5	7	127	4.2	4.8	5.5	4.6	5.6	6.2	5.4	5.8	3.7	4.5
	2004	5	8	128	4.1	4.6	5.1	4.1	4.9	5.2	5.5	5	4.7	4.4
	2004	5	9	129	4.1	4.7	5	4.3	5.3	5	5.2	5.7	4.2	4.4
	2004	5	10	130	4.9	5.3	5.7	4.6	5.7	5.7	6.3	6.8	4.3	5.4
	2004	5	12	132	4.4	5	5.5	4.6	5.7	5.1	5	4.6	5	4.8
	2004	5	13	133	4.5	5	5.8	4.8	5.6	5.8	4.8	4.8	3.1	4.9
	2004	5	14	134	3.8	4.2	4.7	4.2	4.2	4.3	5.4	5.2	6.9	4
	2004	5	15	135	3.3	3.9	4.2	3.4	3.8	4.3	4.9	4.9	5.2	3.6
	2004	5	16	136	3.9	4.6	5.1	4.5	5.4	5.2	4.6	5	4.4	4.1
	2004	5	17	137	3.3	3.8	4.2	3.5	3.9	4.1	4.5	4.9	3.1	3.5
	2004	5	18	138	3.6	4.3	4.6	3.9	4.8	4.7	4.3	5.1	2.6	3.9
	2004	5	19	139	3.9	4.8	4.9	4.1	5.6	5.6	4.9	5.2	4.2	4.1
	2004	5	20	140	3.9	4.7	4.9	4	5.5	5.2	4.4	4.7	4	4.3
	2004	5	21	141	4.3	5.2	5.6	4.6	6.4	6.4	5.2	5.2	4.8	4.7
	2004	5	22	142	5	5.6	6.1	4.6	6.4	7	5.7	5.9	5.2	5.6
	2004	5	23	143	4.4	5.3	5.7	4.6	6.2	6.9	6.3	6.3	5.8	4.8
	2004	5	24	144	4.4	5.4	5.7	4.8	6.3	6.7	6.6	6.3	5.9	4.7
	2004	5	25	145	5.2	5.9	6.3	4.8	6.6	7.4	7.1	6.7	6.3	5.8
	2004	5	26	146	5.2	5.8	6.2	4.5	6.1	7.4	7.6	6.7	6	5.9
	2004	5	27	147	4.8	5.4	5.7	4.2	5.3	6.7	7.5	6.7	8.4	5.4
	2004	5	28	148	4.4	5.1	5.3	3.9	5.1	6.1	6.4	6.3	7.5	4.9
	2004	5	29	149	4.3	5.2	5.5	4.2	5.6	6.7	6.6	5.7	4.5	4.7
	2004	5	30	150	4.5	5.4	5.7	4.5	6	7	6.7	6.2	6.4	5
	2004	5	31	151	4.8	5.5	6.1	5	6.3	7.2	7	6.3	5.1	5.2
	2004	6	1	152	4.4	5.2	5.7	4.5	5.7	6.7	6.3	6	6	4.8
	2004	6	2	153	3.9	4.7	5	4	4.8	5.8	6.4	6	7.7	4.2
	2004	6	3	154	4.6	5.4	5.7	4.7	6.2	6.3	6.6	6.2	3.6	5
	2004	6	4	155	4.8	5.5	5.8	4.8	6.2	6.6	6.7	6.8	5.6	5.2
	2004	6	5	156	5.6	6.3	6.8	5.2	7.2	8.4	7.6	6.8	6.6	6.2
	2004	6	6	157	6.4	6.8	7.4	5.3	7.5	9.2	8.5	7.5	7.6	7.3
	2004	6	7	158	6.4	6.8	7.4	5.5	7.5	8.8	8.9	7.2	10.9	7.2
	2004	6	8	159	6.1	6.8	7.3	5.5	7.9	9.2	8.2	6.3	10.4	6.8
	2004	6	9	160	5.3	5.9	6	4.3	6.1	7	6.6	6.3	9.9	6.1
	2004	6	10	161	5.3	6	6.2	4.8	6.7	7.2	6.9	5.9	7	5.9
	2004	6	11	162	6.2	6.7	7.2	5.1	7.6	8.5	6.8	5.7	5.6	7.1
	2004	6	12	163	5.6	6.3	6.6	5.1	7.4	8	7.1	6.5	5.9	6.3
	2004	6	13	164	5.3	6.2	6.4	5.3	7.1	7.7	8.3	7.2	7	5.7
	2004	6	14	165	5.3	6.3	6.5	5.4	7.1	7.9	9	7.4	7.3	5.8
	2004	6	15	166	5.9	6.7	7	5.5	7.5	8.8	9.3	7.1	7.8	6.5
	2004	6	16	167	6.3	6.8	7.1	5.2	7.3	8.4	8.5	6.6	8.5	7.1
	2004	6	17	168	6.1	6.7	7.1	5.1	7.2	8.7	8.4	6.8	8.1	7
	2004	6	18	169	7.4	7.4	8	5.2	7.6	9.8	9.1	7	7	8.6
	2004	6	19	170	7	7.2	7.7	5.1	7.2	9.7	9.5	7.4	9.2	8.2
	2004	6	20	171	6.2	6.7	7.2	4.9	7.2	9.3	8.5	6.6	9.1	7.1
	2004	6	21	172	6.4	6.7	7.1	5	7.3	9	8.3	7.8	8.3	7.3
	2004	6	22	173	4.6	5.7	5.8	4.6	6	7.6	8.8	7.4	8	5
	2004	6	23	174	5.8	6.5	6.9	5.2	7	8.5	9.1	7.3	8.7	6.5
	2004	6	24	175	5.7	6.5	6.8	5	7.4	8.9	8	6.5	6.8	6.5
	2004	6	25	176	6.6	6.9	7.3	5	7.5	8.9	7.8	6.8	5.7	7.6
	2004	6	26	177	6.1	6.5	6.8	4.8	6.9	8.2	7.8	6.8	6.3	7
	2004	6	27	178	5.8	6.7	6.9	5.1	7.4	9.1	9.4	7.2	6.2	6.5
	2004	6	28	179	6.3	6.7	6.8	4.6	6.5	8.5	9.3	7.4	6.6	7.2
	2004	6	29	180	5.7	6.5	6.7	5.3	7.5	8	7.8	6.2	8	6.4
	2004	6	30	181	6.5	6.9	7.2	5.3	7.7	8.6	8.2	7.3	8	7.4
	2004	7	1	182	6.7	7	7.3	5.2	7.5	9	8.9	7.8	7.7	7.8
	2004	7	2	183	6.8	7.2	7.6	5.3	7.8	9.5	8.7	6.8	8.8	7.9
	2004	7	3	184	6.9	7.2	7.5	5.1	7.7	9.8	9.1	7.9	9.2	8
	2004	7	4	185	6	6.8	7.1	5.1	7.5	9.9	10.2	8	9	6.7
	2004	7	5	186	5.9	6.8	7	5.2	7.2	9.3	10.6	8	9.3	6.7
	2004	7	6	187	7.2	7.5	7.8	5.2	7.7	10.3	10.8	7.7	9	8.4
	2004	7	7	188	8.2	8	8.4	5.4	7.8	10.5	10.8	8.1	8	9.7
	2004	7	8	189	6.4	6.9	7.3	5	7	9.7	10.8	8	9.1	7.3
	2004	7	9	190	4.2	5.1	5.3	3.6	4.1	6.6	10.3	6.1	10.9	4.7
	2004	7	10	191	6.8	7.2	8.2	5.7	7.6	10	9.4	6.5	9.7	7.8
	2004	7	11	192	7	7.3	7.8	5.3	7.8	9.7	8.9	7.1	10.5	8.2
	2004	7	12	193	6.3	6.9	7.4	5.2	7.6	9.8	9.4	7.1	10.7	7.2
	2004	7	13	194	6.8	7.2	7.7	5.2	7.4	9.9	9.8	7.3	10.9	7.9
	2004	7	14	195	8	7.9	8.7	5.4	7.8	10.9	10.1	7.1	11	9.4
	2004	7	16	197	7.1	7.2	7.6	5.4	7.6	8.5	8.3	7.5	11.3	8.2
	2004	7	17	198	6.3	6.7	7	5.2	6.9	7.8	9	6.9	11.8	7.1
	2004	7	18	199	5.9	6.6	6.9	5.3	7.2	8.4	9.3	6.8	11	6.5
	2004	7	19	200	5.1	6.2	6.4	5	7	8.4	9.1	6.6	9.6	5.6
	2004	7	20	201	5.4	6.3	6.6	5.1	7.2	8.7	9.2	7.3	9.9	5.9
	2004	7	21	202	5.7	6.5	6.7	5	7.2	8.8	9.1	7.1	10.5	6.4
	2004	7	22	203	5.9	6.4	6.8	4.9	7	8.4	8	6.6	9.5	6.7
	2004	7	23	204	5.1	6.2	6.4	5	7	8.5	9.1	6.8	9.9	5.6
	2004	7	24	205	5.2	6.3	6.5	4.9	7.2	9	8.9	6.4	8.3	5.8
	2004	7	25	206	5	6	6.2	4.6	6.8	8.3	8.1	6.8	8.4	5.6
	2004	7	26	207	4.9	5.9	6.1	4.7	6.7	8.2	8.5	6.7	9.3	5.4
	2004	7	28	209	5.8	6.5	6.7	4.6	6.7	9.1	9.8	7.7	8.7	6.6
	2004	7	29	210	4.7	5.8	5.9	4.2	5.8	8.2	10.1	7.8	9.9	5.3
	2004	7	31	212	4.9	6.2	6.3	5	6.9	8.9	10.3	7.7	11.1	5.2
	2004	8	1	213	5.8	6.5	6.8	4.9	7.1	9.1	9.7	8.2	11.2	6.6
	2004	8	2	214	6.5	6.7	7.3	4.9	7.2	9.2	8.4	7.1	11	7.5
	2004	8	3	215	5.7	5.7	6.8	4.9	5.9	8.1	7.6	6.7	11	6.5
	2004	8	4	216	5.5	6.1	6.5	4.5	6.4	8.6	8.5	7.3	9.8	6.3
	2004	8	5	217	5.6	6.1	6.9	5	6.5	8.8	8.7	6.9	10	6.3
	2004	8	6	218	6.4	6.8	7.3	4.9	6.9	9.1	9.6	6.5	8.8	7.4
	2004	8	7	219	5.3	6.2	6.5	4.7	6.7	8.7	9.3	6.9	9.6	5.9
	2004	8	8	220	5.7	6.2	7	5.1	6.4	9	9.6	7.2	10.4	6.3
	2004	8	9	221	5.1	5.8	6.4	4.7	6.2	8.2	8.8	7.1	10.7	5.7
	2004	8	10	222	5.1	5.9	6.2	4.7	6.3	7.7	8.8	6.7	10.2	5.7
	2004	8	11	223	4.6	5.6	5.7	4.4	6.3	7.2	7.8	6.3	7.3	5.1
	2004	8	12	224	4.9	5.7	5.9	4.3	6.3	7.6	7.8	5.7	6.8	5.4
	2004	8	13	225	4.9	5.8	6	4.3	6.5	7.8	7.6	5.9	7.4	5.5
	2004	8	14	226	4.7	5.7	6.1	4.6	6.6	8.2	8.1	5.9	8.6	5.2
	2004	8	15	227	4.8	5.7	6.2	4.6	6.2	8.1	8.1	6.1	8.8	5.3
	2004	8	16	228	5.5	5.9	6.6	4.6	6.2	8.2	7.9	6.4	8.9	6.3
	2004	8	17	229	5.7	6	6.6	4.5	6.3	8.2	7.6	6.5	8.7	6.5
	2004	8	18	230	5.3	5.7	6.4	4.6	6.3	7.7	7.3	6.6	8.4	6.1
	2004	8	19	231	4.7	5.5	6	4.7	6.1	7.7	8.3	6.4	8.5	5.1
	2004	8	20	232	4.7	5.5	6.1	4.8	6.1	7.7	8.1	6	9.2	5.1
	2004	8	21	233	4.2	5	5.4	4.1	5.3	6.7	7	5.9	8.4	4.6
	2004	8	22	234	5.2	5.6	6.2	4.7	5.9	7.2	7.7	6.3	6.2	5.8
	2004	8	23	235	4.9	5.4	6	4.5	5.7	6.9	7.9	6.1	6.8	5.5
	2004	8	24	236	4.5	5.5	5.8	4.3	6.1	7.8	8.2	6.4	6.4	5
	2004	8	25	237	4.5	5.4	5.7	4.3	5.8	7.7	8.6	6	6.4	4.9
	2004	8	26	238	4.6	5.6	5.9	4.4	6.2	8	8.8	6	6.8	5.1
	2004	8	27	239	4.2	5.3	5.5	4.1	6	7.5	7.6	6.2	6.9	4.6
	2004	8	28	240	4.3	5.3	5.7	4.4	5.9	7.6	7.7	5.8	5.9	4.7
	2004	8	29	241	4.5	5.3	5.7	4.5	5.9	7	7.8	6	7.4	4.9
	2004	8	30	242	4.3	5.1	5.4	4.4	5.6	6.7	7.7	6.2	8.9	4.6
	2004	8	31	243	4.2	5	5.5	4.2	5.5	7	7.2	5.9	8.6	4.7
	2004	9	1	244	4.1	4.9	5.4	4.3	5.4	6.9	7.4	5.8	7.5	4.5
	2004	9	2	245	4.3	5.1	5.5	4	5.4	7.1	7.5	5.9	7.8	4.8
	2004	9	3	246	4.3	5	5.5	4.3	5.5	6.8	7.4	5.8	7.8	4.7
	2004	9	4	247	4.5	5.2	5.8	4.2	5.4	7.6	7.8	5.4	7.2	5
	2004	9	5	248	3.9	4.5	5	3.6	4.3	6.4	7.9	5.5	7.9	4.4
	2004	9	6	249	4.7	5.1	5.9	4.1	5.4	7.5	7	4.9	8.7	5.3
	2004	9	7	250	5.1	5.4	6.2	4.1	5.7	7.7	6.7	5	6.8	5.9
	2004	9	8	251	5	5.2	5.9	3.9	5.4	7.4	7	5.3	6.3	5.8
	2004	9	9	252	4.3	5.1	5.7	4.1	5.7	7.8	7.4	5.3	6.1	4.8
	2004	9	10	253	3.8	4.5	5	3.7	5	6.6	6.1	5.1	7.3	4.2
	2004	9	11	254	3.5	4.4	4.9	3.8	5.2	6.3	5.7	4.6	7.4	3.8
	2004	9	12	255	3.5	4.2	4.7	3.6	5.1	6	4.9	4.1	7	3.8
	2004	9	13	256	4.1	4.7	5.2	3.5	5.4	6.6	5.5	4.7	5.9	4.7
	2004	9	14	257	3.4	4.3	4.5	3.6	5.1	5.7	5.9	4.9	5.8	3.6
	2004	9	15	258	3.8	4.5	4.9	3.9	5.1	6.2	6.3	5.4	5.5	4.1
	2004	9	16	259	4.3	4.6	5.1	3.9	4.9	5.7	6.3	5.1	7.6	4.8
	2004	9	18	261	3.4	4.1	4.3	3.8	4.5	4.6	6.5	5.6	7.4	3.6
	2004	9	19	262	3.3	4.2	4.4	3.4	4.6	5.5	6.1	4.8	6.1	3.6
	2004	9	20	263	3.3	4.1	4.3	3.7	4.5	5.1	6.6	4.8	7	3.5
	2004	9	21	264	3.4	4.3	4.5	3.5	4.6	5.9	6.8	5.2	6.3	3.7
	2004	9	22	265	3.6	4.2	4.6	3.5	4.5	5.7	6.4	4.8	6.2	3.9
	2004	9	23	266	4.2	4.4	4.9	3.4	4.7	6	5.7	5	4.9	4.8
	2004	9	25	268	3.1	4	4.2	3.3	4.4	5.8	6.5	5	5.4	3.3
	2004	9	26	269	3	4.1	4.3	3.2	4.5	6	6.6	5.2	5.7	3.3
	2004	9	27	270	3.1	4.1	4.2	3.3	4.5	5.6	6.6	5	6.2	3.4
	2004	9	28	271	3.3	4.2	4.5	3.3	4.6	6.4	6.9	5.3	6.9	3.6
	2004	9	29	272	3.1	4	4.2	3	4.4	5.9	6.4	4.8	7	3.4
	2004	9	30	273	3.2	4	4.3	3	4.5	6	6	4.6	5.7	3.6
	2004	10	1	274	2.9	3.7	3.9	3.1	4	5	6	4.6	5.9	3.1
	2004	10	2	275	3	3.6	3.9	3.4	3.8	4.6	6	4.1	6.1	3.1
	2004	10	3	276	2.5	3.1	3.3	2.6	3.1	4.1	4.9	4.1	5.5	2.8
	2004	10	4	277	2.9	3.6	4	2.7	4	5.4	5.2	3.9	4.5	3.2
	2004	10	5	278	2.8	3.6	3.9	2.7	4	5.3	5	3.9	4.5	3.2
	2004	10	6	279	2.5	3.3	3.4	2.3	3.2	4.6	5.2	4	5	2.8
	2004	10	7	280	2.3	3.3	3.5	2.5	3.8	5	5	3.6	4.9	2.5
	2004	10	8	281	2.3	3.2	3.4	2.3	3.4	4.8	4.9	3.5	4.8	2.5
	2004	10	9	282	3	3.6	4	2.5	4	5.5	4.6	3.2	4.9	3.5
	2004	10	10	283	2.5	3.2	3.5	2.3	3.7	4.7	4	3.5	4.9	2.9
	2004	10	11	284	2.5	3.3	3.5	2.4	3.8	5.1	4.6	3.7	4.2	2.8
	2004	10	12	285	2.1	2.9	2.9	1.8	2.4	3.6	4.3	2.7	4.3	2.3
	2004	10	13	286	2.1	2.8	2.9	1.7	2.1	3.3	4	2.3	3	2.3
	2004	10	14	287	2.9	3.3	3.6	2.1	3.3	4.7	4.3	3.4	2.5	3.4
	2004	10	15	288	3.1	3.3	3.8	2.3	3.3	4.9	4.5	3.4	3.1	3.7
	2004	10	16	289	3	3.3	3.7	2.1	3.1	4.8	4.7	3.1	4.4	3.5
	2004	10	17	290	2.3	2.9	3.1	2.2	3	4.3	4.8	3.3	3.7	2.5
	2004	10	18	291	2.6	3	3.3	2.5	3.2	4.1	5	3.5	3.9	2.9
	2004	10	19	292	2.8	3.2	3.6	2.3	3.4	5	5.2	3.7	5.4	3.2
	2004	10	20	293	2.1	2.9	3.1	2.3	3.3	4.7	4.8	3.4	5.2	2.2
	2004	10	22	295	1.7	2.4	2.6	1.8	2.8	3.6	3.3	2.8	2.9	1.8
	2004	10	23	296	1.9	2.5	2.7	1.9	3.1	3.9	3.3	2.8	6.3	2
	2004	10	24	297	1.7	2.4	2.5	1.7	2.6	3.5	3.4	2.8	5	1.8
	2004	10	25	298	2.1	2.7	3	1.8	3	4.2	3.9	3	4.4	2.4
	2004	10	26	299	2.5	2.8	3	1.8	2.7	4.1	4.2	3.1	4.4	2.9
	2004	10	27	300	1.7	2.4	2.4	1.5	1.8	3.2	4.4	3	4.7	1.9
	2004	10	28	301	1.9	2.7	2.8	1.8	2.6	4.2	4.7	2.9	4.2	2.1
	2004	10	29	302	1.2	1.8	1.9	1	0.2	1.4	3.3	1.9	3.5	1.4
	2004	10	30	303	1.4	2	2	1.1	1	2	2.8	1.6	2.4	1.6
	2004	10	31	304	2.1	2.5	2.7	1.4	2.2	3.4	3.4	2.4	1.8	2.4
	2004	11	1	305	1.9	2.5	2.7	1.4	2.5	3.6	3.4	2.3	-999	2.3
	2004	11	2	306	2.6	2.8	3.1	1.5	2.7	4.2	3.6	2.4	-999	3.1
	2004	11	3	307	1.9	2.4	2.6	1.4	2.6	3.6	3.3	2.4	-999	2.2
	2004	11	4	308	1.3	1.8	1.8	1.3	1.4	2.3	3.2	2.2	-999	1.4
	2004	11	5	309	1.4	1.9	2	1.4	2.3	2.7	2.8	2.2	-999	1.5
	2004	11	6	310	1.1	1.4	1.5	0.8	0	0.6	2.1	1.2	-999	1.3
	2004	11	7	311	1.1	1.4	1.5	0.8	0.1	0.8	2.1	1	-999	1.2
	2004	11	8	312	1.7	1.8	2	1.3	1.6	2	2.9	1.9	-999	2
	2004	11	9	313	0.9	1.1	1.1	1	0.4	0.9	2.8	1.6	-999	0.9
	2004	11	10	314	1.2	1.3	1.4	0.9	0.2	0.9	2.7	1.4	-999	1.4
	2004	11	11	315	1.6	1.9	2	1.2	2	2.7	2.7	1.8	-999	1.8
	2004	11	12	316	1.2	1.8	1.9	1.3	2.1	2.8	2.9	1.9	-999	1.3
	2004	11	13	317	1.2	1.8	1.8	1.3	2.1	2.6	2.9	2	-999	1.3
	2004	11	14	318	1.3	1.7	1.8	1.2	2	2.5	2.9	2	-999	1.4
	2004	11	15	319	1	1.5	1.5	1	1.2	1.7	2.6	1.9	-999	1
	2004	11	16	320	0.9	1.3	1.3	0.9	0.5	1.1	2.6	1.5	-999	1
	2004	11	17	321	0.8	1.3	1.3	0.8	0.2	0.8	1.9	0.9	-999	0.8
	2004	11	18	322	0.9	1.5	1.5	0.9	1.9	2.2	1.9	1.4	-999	0.9
	2004	11	19	323	1.1	1.5	1.6	0.9	1.9	2	1.8	1.6	-999	1.3
	2004	11	20	324	0.9	1.2	1.2	0.8	0.3	0.7	1.6	1.4	-999	1.1
	2004	11	21	325	0.9	1.2	1.3	0.7	-0.2	0.4	1.6	0.8	-999	1
	2004	11	22	326	0.8	1.2	1.2	0.8	0.9	0.8	1.4	1.1	-999	0.9
	2004	11	23	327	0.7	0.9	1	0.8	1.4	0.7	1	1	-999	0.8
	2004	11	24	328	0.7	0.9	1	0.7	1.3	0.6	0.9	1.1	-999	0.7
	2004	11	25	329	0.6	0.9	0.9	0.6	-0.1	0.1	0.9	0.7	-999	0.7
	2004	11	26	330	0.5	0.8	0.8	0.6	-0.2	0	0.7	0.8	-999	0.6
	2004	11	27	331	0.7	1	1	0.7	1.3	0.7	0.8	0.9	-999	0.7
	2004	11	28	332	0.9	1.2	1.3	0.6	1.5	1.3	0.9	1.1	-999	1.1
	2004	11	29	333	0.7	1.1	1.1	0.6	1.2	1	0.9	1	-999	0.8
	2004	11	30	334	1.1	1.2	1.4	0.6	1.5	1.4	1.1	1.2	-999	1.3
	2004	12	1	335	1.1	1.2	1.3	0.6	0.9	1	1.1	1.3	-999	1.3
	2004	12	2	336	1.1	1.4	1.5	0.6	1.6	1.9	1.4	1.3	-999	1.4
	2004	12	3	337	1.1	1.3	1.4	0.6	1.3	1.4	1.3	1.3	-999	1.3
	2004	12	4	338	1.7	1.6	1.8	0.6	1.5	2	1.5	1.4	-999	2.1
	2004	12	5	339	1	1	1.1	0.7	0.9	0.8	1.4	1.2	-999	1.1
	2004	12	6	340	1	1.3	1.4	0.6	1.2	1.5	1.4	1	-999	1.2
	2004	12	7	341	0.7	1.1	1.1	0.6	1	1.2	1.2	1.2	-999	0.8
	2004	12	8	342	0.6	1	1	0.6	0.9	1	1.2	0.8	-999	0.6
	2004	12	9	343	0.7	0.8	0.8	0.7	1.1	0.6	1.4	1.3	-999	0.7
	2004	12	10	344	0.6	1	1	0.5	1.2	1	1.1	0.9	-999	0.7
	2004	12	11	345	0.7	1	1	0.5	0.4	0.4	0.8	0.7	-999	0.8
	2004	12	12	346	0.7	0.9	1	0.5	1.2	0.8	0.9	1	-999	0.8
	2004	12	13	347	1.1	1.2	1.3	0.5	1.3	1.2	1	0.8	-999	1.3
	2004	12	14	348	0.6	0.9	0.9	0.5	1.1	0.7	0.9	1	-999	0.6
	2004	12	15	349	0.5	0.8	0.8	0.5	1.2	0.5	0.7	0.8	-999	0.5
	2004	12	16	350	0.7	0.9	0.9	0.5	1.2	0.6	0.6	0.8	-999	0.9
	2004	12	17	351	1	1	1.2	0.4	1.1	0.8	0.6	1	-999	1.2
	2004	12	18	352	1	1	1.2	0.4	1.1	0.7	0.6	0.8	-999	1.2
	2004	12	19	353	0.7	1	1	0.5	0.3	0.3	0.7	0.8	-999	0.8
	2004	12	20	354	0.6	1	1	0.5	0.3	0.3	0.6	0.5	-999	0.7
	2004	12	21	355	0.8	1.1	1.2	0.5	1.2	1.3	1.1	1.1	-999	0.9
	2004	12	22	356	0.6	1.1	1.1	0.5	1.2	1.2	1.2	1.2	-999	0.7
	2004	12	23	357	0.7	1.1	1.1	0.6	-0.1	0.2	0.9	0.7	-999	0.7
	2004	12	24	358	0.6	1.1	1.1	0.6	-0.2	0.3	1.1	0.6	-999	0.7
	2004	12	25	359	0.7	1	1.1	0.6	0.7	0.9	1.3	0.9	-999	0.7
	2004	12	26	360	0.7	1.1	1.1	0.6	1.3	1.4	1.5	1.2	-999	0.7
	2004	12	27	361	0.7	1.1	1.1	0.6	1.5	1.5	1.6	1.4	-999	0.8
	2004	12	28	362	0.7	0.9	0.9	0.8	0.9	0.6	1.8	1.6	-999	0.8
	2004	12	29	363	0.7	1	1	0.7	1	0.8	1.7	1.4	-999	0.8
	2004	12	30	364	0.7	0.9	0.9	0.7	0.9	0.7	1.6	1.3	-999	0.7
	2004	12	31	365	0.7	0.9	1	0.7	1.2	0.9	1.7	1.5	-999	0.8
	2005	1	1	1	0.9	1.2	1.3	0.7	1	1.2	1.7	1.4	-999	1.1
	2005	1	2	2	0.8	1	1	0.7	0.4	0.6	1.4	1.1	-999	1
	2005	1	3	3	1.3	1.2	1.4	0.7	1.5	1.6	1.5	1.2	-999	1.5
	2005	1	4	4	1	1.3	1.4	0.6	0	0.3	0.9	0.6	-999	1.3
	2005	1	5	5	0.7	0.8	0.9	0.6	0.3	0.3	0.9	0.5	-999	0.8
	2005	1	7	7	0.6	0.7	0.7	0.7	1	0.4	1	1.1	-999	0.6
	2005	1	8	8	1	1.2	1.3	0.6	1.4	1.2	1.1	1.2	-999	1.3
	2005	1	9	9	0.9	1	1.1	0.7	1.3	0.9	1.3	1.2	-999	1.1
	2005	1	10	10	1.4	1.4	1.5	0.7	1.2	1.4	1.2	1.3	-999	1.7
	2005	1	11	11	1	1.2	1.3	0.7	1.6	1.3	1.2	1.1	-999	1.1
	2005	1	12	12	0.8	0.9	0.9	0.8	1.2	0.7	1.4	1.5	-999	0.9
	2005	1	13	13	0.8	1	1.1	0.8	1.4	1.1	1.5	1.3	-999	0.9
	2005	1	14	14	0.7	1	1	0.7	0.9	0.8	1.3	1.3	-999	0.8
	2005	1	15	15	0.6	0.9	0.9	0.7	0.7	0.6	1.1	1	-999	0.7
	2005	1	16	16	0.7	1	1.1	0.7	0.8	0.9	1.3	1.1	-999	0.8
	2005	1	17	17	0.8	1.2	1.2	0.7	0.7	0.7	1.2	1.2	-999	0.9
	2005	1	18	18	0.7	1.1	1.1	0.7	0.5	0.6	1	0.8	-999	0.8
	2005	1	19	19	0.8	1.1	1.1	0.8	1.3	1	1.1	1.1	-999	0.9
	2005	1	20	20	0.7	0.9	0.9	0.8	0.8	0.6	1.2	1	-999	0.7
	2005	1	21	21	0.6	0.6	0.6	0.6	0.1	0.1	1	0.9	-999	0.6
	2005	1	22	22	0.6	0.7	0.7	0.6	-0.1	0.1	1	0.7	-999	0.6
	2005	1	23	23	0.6	0.8	0.8	0.6	0	0.1	0.9	0.7	-999	0.7
	2005	1	24	24	0.8	0.9	0.9	0.9	1.1	0.4	1	1	-999	0.8
	2005	1	25	25	0.7	0.9	0.9	0.9	1.1	0.4	0.8	1.2	-999	0.8
	2005	1	26	26	0.8	0.9	1	0.9	1.2	0.5	1	1.2	-999	0.8
	2005	1	27	27	0.8	0.9	1	0.8	0.6	0.5	1.2	1.1	-999	0.9
	2005	1	28	28	0.8	0.9	0.9	0.9	0.7	0.5	1.2	1.3	-999	0.9
	2005	1	29	29	1.2	1.4	1.5	0.8	0.8	0.9	1.4	1.2	-999	1.4
	2005	1	30	30	0.8	1	1.1	0.7	-0.1	0.3	1.1	0.8	-999	0.9
	2005	1	31	31	0.8	1	1	0.7	0	0.2	1.3	0.7	-999	0.9
	2005	2	1	32	0.7	0.9	0.9	0.8	0.4	0.3	1.1	0.9	-999	0.7
	2005	2	2	33	0.8	1	1	0.7	0.4	0.4	0.9	1.1	-999	0.9
	2005	2	3	34	0.7	0.9	0.8	0.9	0.6	0.3	1.1	0.9	-999	0.8
	2005	2	4	35	0.5	0.6	0.6	0.6	-0.1	0.1	0.9	1	-999	0.6
	2005	2	5	36	0.7	0.9	0.9	0.8	0.4	0.3	1	1.2	-999	0.8
	2005	2	6	37	0.8	0.9	0.9	0.9	0.7	0.3	1	0.9	-999	0.8
	2005	2	7	38	1	1.2	1.2	1.1	1.4	0.6	1	1.4	-999	1.1
	2005	2	8	39	0.9	1.1	1.1	1.2	1.4	0.3	0.8	1	-999	1
	2005	2	9	40	1	1.2	1.2	1.1	1.5	0.2	0.7	1.1	-999	1
	2005	2	10	41	1.2	1.4	1.5	1.2	1.8	0.8	0.8	1.3	-999	1.3
	2005	2	11	42	0.8	1	1	0.8	0.6	0.3	0.6	0.5	-999	0.9
	2005	2	12	43	0.9	1.1	1.2	0.8	0.6	0.3	0.6	0.8	-999	0.9
	2005	2	13	44	1	1.2	1.2	0.9	0.9	0.6	0.7	1.2	-999	1.1
	2005	2	14	45	0.7	0.9	0.9	0.7	0.1	0.2	0.7	1.1	-999	0.8
	2005	2	15	46	1.3	1.4	1.5	1.4	1.7	1	1.2	1.2	-999	1.4
	2005	2	16	47	1.1	1.3	1.3	1.2	1.2	0.7	1.3	1.6	-999	1.2
	2005	2	17	48	1.3	1.5	1.5	1.4	1.4	1.2	1.7	2.1	-999	1.4
	2005	2	18	49	1.3	1.4	1.4	1.5	1.4	1	1.9	2.1	-999	1.3
	2005	2	19	50	1	1.2	1.3	0.9	0.4	0.7	1.9	1.5	-999	1
	2005	2	20	51	1.3	1.4	1.5	1.5	1.4	1.1	2	1.7	-999	1.3
	2005	2	21	52	1.4	1.6	1.6	1.4	1.4	1.3	1.6	1.7	-999	1.5
	2005	2	22	53	1.9	2.1	2.3	1.8	2.5	1.9	1.8	2	-999	2.2
	2005	2	23	54	1.7	1.9	2.1	1.8	2.3	1.8	1.8	2.1	-999	1.9
	2005	2	24	55	2	2.2	2.4	1.9	2.6	2.2	1.9	2.3	-999	2.3
	2005	2	25	56	2	2.1	2.4	1.8	2.4	2.4	1.9	2.3	-999	2.3
	2005	2	26	57	2.8	2.7	3.2	1.9	2.8	3	2.1	2.3	-999	3.4
	2005	2	27	58	1.2	1.4	1.5	1	0.5	0.9	1.7	1.6	-999	1.4
	2005	2	28	59	0.9	1.1	1.1	0.9	0.1	0.6	2	2.2	-999	1
	2005	3	1	60	-999	-999	-999	-999	-999	-999	2.1	2.3	-999	-999
	2005	3	2	61	-999	-999	-999	-999	-999	-999	2.4	2.4	-999	-999
	2005	3	3	62	-999	-999	-999	-999	-999	-999	2.4	1.6	-999	-999
	2005	3	4	63	-999	-999	-999	-999	-999	-999	2.2	2.2	-999	-999
	2005	3	5	64	-999	-999	-999	-999	-999	-999	2.2	2.9	-999	-999
	2005	3	6	65	-999	-999	-999	-999	-999	-999	2	1.5	-999	-999
	2005	3	7	66	-999	-999	-999	-999	-999	-999	2.3	2.4	-999	-999
	2005	3	8	67	-999	-999	-999	-999	-999	-999	2	1.3	-999	-999
	2005	3	9	68	-999	-999	-999	-999	-999	-999	2.4	2.2	-999	-999
	2005	3	10	69	-999	-999	-999	-999	-999	-999	1.7	1.8	-999	-999
	2005	3	11	70	-999	-999	-999	-999	-999	-999	1.6	2	-999	-999
	2005	3	12	71	2	2.4	2.7	2.2	3	1.9	1.5	1.8	-999	2.2
	2005	3	13	72	2.3	2.6	3	2.6	3.5	2.5	1.6	2.3	-999	2.4
	2005	3	14	73	2.5	2.9	3.3	2.7	3.8	3.1	1.9	2.5	-999	2.8
	2005	3	15	74	2.5	2.9	3.3	2.6	3.8	3.3	2.1	2.8	-999	2.7
	2005	3	16	75	2.6	3.2	3.5	2.6	4.3	3.5	2.3	2.7	-999	2.9
	2005	3	18	77	2.8	3.3	3.7	2.9	4.5	3.8	2.5	3	-999	3
	2005	3	19	78	3	3.3	3.8	3	4.2	3.8	2.6	3.1	-999	3.3
	2005	3	20	79	2.6	2.9	3.2	2.4	2.9	3.2	2.7	2.8	-999	3
	2005	3	21	80	1.7	2	2.1	1.5	1.1	1.8	2.4	2.3	-999	2
	2005	3	22	81	1.9	2.1	2.2	1.2	0.7	1.3	1.9	2	-999	2.3
	2005	3	23	82	2.9	3.3	3.8	3	4.4	3.3	2	2.5	-999	3.1
	2005	3	24	83	3	3.3	4.1	2.9	4.3	3.4	1.5	2.4	-999	3.5
	2005	3	25	84	3	3.3	4	3	4.3	3.4	1.7	2.7	-999	3.4
	2005	3	26	85	2.9	3.3	3.8	2.9	4.2	3.2	1.9	2.9	-999	3.3
	2005	3	27	86	2.9	3.4	3.7	3	4.3	3.2	2.5	3.4	-999	3.2
	2005	3	28	87	2.1	2.4	2.5	2.4	2.2	1.9	2.8	3.3	-999	2.2
	2005	3	29	88	3	3.4	3.8	3	3.8	3.6	3.4	3.7	-999	3.3
	2005	3	30	89	3.4	3.9	4.3	3.5	4.7	4.4	3.7	3.8	-999	3.7
	2005	3	31	90	3.3	3.5	3.9	2.9	3.5	3.8	3.6	3.9	-999	3.7
	2005	4	1	91	3.7	3.8	4.5	3.2	3.9	4.6	3.7	3.2	1.3	4.3
	2005	4	2	92	1.6	1.9	1.9	1.4	0.8	1.4	2.5	2.1	2.2	1.8
	2005	4	3	93	2.1	2.5	2.6	1.8	1.8	1.8	1.9	1.9	1.5	2.5
	2005	4	4	94	3	3.4	3.9	3.1	4.2	3.3	2.1	2.9	1.2	3.3
	2005	4	5	95	3.3	3.8	4.4	3.7	5	3.9	2.5	3.1	2.6	3.5
	2005	4	6	96	3	3.5	3.8	3.2	4.1	3.3	2.7	3.4	2.6	3.3
	2005	4	7	97	4.2	4.4	5.4	4	5.6	5.6	3.1	3.9	2.8	4.8
	2005	4	8	98	3.6	3.9	4.5	3.6	4.5	4.8	3.4	4	3.8	3.9
	2005	4	9	99	2.7	3.1	3.4	3.2	3.1	3	3.7	3.5	3.9	2.9
	2005	4	10	100	3.6	4	4.5	4.2	4.6	4.1	4.1	4.7	3	3.8
	2005	4	11	101	4	4.6	5.2	4.4	5.7	5.6	4.8	4.8	3.9	4.2
	2005	4	12	102	4.5	4.9	5.7	4.6	5.8	5.9	5	5.1	6.6	4.9
	2005	4	13	103	3.6	4	4.6	3.7	4.4	5.1	4.9	4.8	5.5	4
	2005	4	14	104	4.3	4.9	5.4	4	5.6	6	5.2	4.6	7.8	4.8
	2005	4	15	105	4.1	4.6	5.4	4.7	5.9	5.5	3.9	3.8	4	4.4
	2005	4	16	106	3.4	4	4.4	3.8	4.8	3.9	3.4	3.9	3.8	3.7
	2005	4	17	107	3.8	4.2	4.9	4.4	4.8	3.9	3.5	4.3	2.8	4.1
	2005	4	18	108	3.2	3.4	3.8	3.4	3.5	3.7	4.1	4.6	2.8	3.5
	2005	4	19	109	3.9	4.2	4.7	4.8	4.4	3.7	5.2	4.9	7.6	4
	2005	4	20	110	3.8	4.1	4.7	4.6	4.7	3.8	4	4.7	5.8	3.9
	2005	4	21	111	3.8	4.3	4.9	4.5	5	4.3	4.1	4.6	3	4
	2005	4	22	112	2.2	2.5	2.6	2.1	1.6	2.6	4.9	3.9	4	2.4
	2005	4	23	113	2.9	3.3	3.5	2.7	2.7	3.8	4.8	3.6	7	3.3
	2005	4	24	114	2.3	3.2	3.2	2.4	2.7	3.1	3.4	2.2	3.4	2.5
	2005	4	25	115	4.6	5.1	5.7	3.9	5.9	6.3	4.2	4.3	1.5	5.3
	2005	4	26	116	4.6	5.2	5.8	4.5	6.3	6.4	4.8	4.7	1.4	5.1
	2005	4	27	117	4.3	5	5.8	4.8	6.3	6.2	4.4	4.8	3	4.6
	2005	4	28	118	4.3	4.6	5.4	4.1	5.1	5.9	4.5	4.8	3.3	4.9
	2005	4	29	119	4.4	5	5.9	4.7	6.3	6.6	4.3	4.6	3.9	4.7
	2005	4	30	120	4.1	4.7	5.5	4.4	5.7	6.1	4.5	4.6	5.2	4.4
	2005	5	1	121	3.8	4.4	5.1	4.1	5.1	5.5	4.2	4.5	3.8	4.1
	2005	5	2	122	4	4.7	5.3	4.5	5.8	5.7	4	4.5	3.9	4.2
	2005	5	3	123	4.3	4.8	5.6	4.3	5.9	5.9	3.7	4.1	2.9	4.7
	2005	5	4	124	2.9	3.1	3.5	2.3	2.4	3.1	2.7	3.3	2.4	3.4
	2005	5	5	125	5.2	5.5	6.8	4.7	6.7	6.5	3.7	4.5	2.2	6
	2005	5	6	126	4.9	5.3	6.4	4.9	6.4	6.9	4.8	5.4	2.4	5.5
	2005	5	7	127	4.7	5.2	6	4.8	6.1	6.5	5.4	5.4	1.3	5.2
	2005	5	8	128	3.8	4.3	4.7	3.6	4.2	5.4	5.8	5.5	2.5	4.2
	2005	5	9	129	4.9	5.4	6.2	5.2	6.6	6.1	4.9	5.4	5.5	5.3
	2005	5	10	130	5.3	5.6	6.7	5.7	6.6	6.6	5.5	5.6	5.4	5.7
	2005	5	11	131	5.3	5.8	6.8	6.1	6.7	6.7	6.3	6.2	4.9	5.6
	2005	5	12	132	5.1	5.5	6.3	6.2	5.6	5.1	6.6	5.9	6.7	5.3
	2005	5	13	133	4.7	4.8	5.5	4.3	4.6	5.5	6.7	5.9	5.9	5.3
	2005	5	14	134	5.1	5.6	6.6	5.6	6.7	6.8	5.8	5.3	6.4	5.4
	2005	5	15	135	4.9	5.6	5.9	5.6	6.9	5.6	6	5.5	5.3	5
	2005	5	16	136	4.9	5.5	6.3	5.4	6.4	6.6	6	5.9	7	5.2
	2005	5	17	137	4.3	4.8	5.5	4.8	5.1	6.1	6.6	6	4.7	4.6
	2005	5	18	138	5.6	5.9	7	5.4	6.6	7.2	6.4	6.2	5.1	6.2
	2005	5	19	139	6.2	6.6	8	6.5	7.8	8.7	6.9	6.6	6.1	6.8
	2005	5	20	140	6.4	6.5	8	5.9	7.5	8.9	7	6.8	6.3	7.2
	2005	5	21	141	5.5	5.9	6.8	5.3	6.4	7.7	7.4	6.4	6.5	6.1
	2005	5	22	142	5.9	6.3	7.6	6	7.3	8.9	7.5	6.6	5.6	6.4
	2005	5	23	143	4.9	5.8	6.1	4.7	6.5	7.6	7.4	5.8	4.6	5.4
	2005	5	24	144	5.7	6.1	7.4	5.6	7.4	8.2	5.7	6.1	6.2	6.4
	2005	5	25	145	5.5	6.1	6.7	5.3	7.4	7.7	6.2	6.4	4.9	6.1
	2005	5	26	146	4.8	5.6	6.1	5.1	6.7	6.9	6	5.9	4.8	5.2
	2005	5	27	147	5	5.6	6.3	4.9	6.3	7.2	6.5	6.1	5.7	5.6
	2005	5	28	148	6.4	6.6	8	5.9	7.6	8.9	6.9	6.4	6.5	7.2
	2005	5	29	149	5.4	5.2	6.1	3.9	4.8	6.5	5.8	5.8	7	6.4
	2005	5	30	150	5.8	6.2	7.6	5.6	7.4	8.5	5.8	5.6	5.1	6.5
	2005	5	31	151	5.6	6.2	7	5.3	7.4	8.2	6.1	5.7	4.7	6.2
	2005	6	1	152	4.9	5.4	6.3	4.9	6	6.9	5.9	5.3	4.9	5.3
	2005	6	2	153	4.7	5	5.9	4.4	5.3	6.6	5.7	5.5	5.1	5.3
	2005	6	3	154	5	5.5	6.2	4.9	6.3	7	6.1	6.3	4	5.5
	2005	6	4	155	3.6	4.1	4.3	3.3	3.5	4.6	5.9	5.6	6.2	4
	2005	6	5	156	4.4	5.1	5.5	4.4	5.9	5.6	4.6	4	6.1	4.9
	2005	6	6	157	6.8	7.1	8.4	5.8	8.7	9.3	5.9	6	6	7.9
	2005	6	7	158	5.9	6.6	7.4	6.1	8.4	9	6.8	6.8	6.6	6.4
	2005	6	8	159	5.5	6.3	7.3	6.5	7.3	8.3	7.8	6.8	9	5.7
	2005	6	9	160	5.8	6.7	7.8	6.8	7.9	9.3	8.2	7.4	8.9	6
	2005	6	10	161	5.9	6.8	7.7	6.6	8	9.4	8.8	7.5	8.7	6.2
	2005	6	11	162	6.2	6.9	8.1	6.7	8.2	9.2	7.8	6.6	8.9	6.7
	2005	6	12	163	7.1	7	8.8	6.3	8.2	9.8	7.2	7.3	8.7	8.1
	2005	6	13	164	6.8	7	8.4	6.3	8.2	9.4	7.2	7.2	8.3	7.7
	2005	6	14	165	6.2	6.6	7.8	6.4	7.6	8.5	7.4	7.1	8.7	6.7
	2005	6	15	166	5.4	6.1	6.8	5.7	6.7	7.8	8.4	6.8	7.5	5.8
	2005	6	16	167	5.8	6.6	7.1	5.9	8.2	8.5	7.2	6.9	7.3	6.4
	2005	6	17	168	6.4	7.2	8	6.5	8.7	9.3	8.3	6.6	6	7
	2005	6	18	169	7.8	8.1	9.1	6.5	9.5	11.1	8.9	7.1	7.8	8.9
	2005	6	19	170	8.5	8.5	9.8	6.3	9.5	11.5	8.6	6.7	7.7	10
	2005	6	20	171	6.1	6.4	7	4.7	6.4	8.6	8.4	6.2	8.5	7
	2005	6	21	172	6.5	7.1	7.6	5.5	8.8	10	7.2	6.2	8.4	7.3
	2005	6	22	173	5.8	6.8	7.1	5.7	8.7	9.3	7.6	5.9	8.2	6.4
	2005	6	23	174	5.8	6.7	7.2	5.9	8.8	9.2	7	6.6	7.9	6.3
	2005	6	24	175	6.4	7.2	7.3	6	9.4	9.5	7.9	7.2	7.7	7
	2005	6	25	176	6	7.2	7.5	6.2	9.3	10.5	8.8	7.2	7.9	6.5
	2005	6	26	177	6.1	7.1	7.3	5.9	9.1	9.8	8.3	6	7.5	6.6
	2005	6	27	178	6.6	7.2	7.7	6	9	9.7	7.6	6.8	7.4	7.4
	2005	6	28	179	7.5	8	8.4	6	9.7	11.1	8.7	7.1	7.7	8.6
	2005	6	29	180	8.1	8.3	8.9	6.1	9.5	11.1	8.8	7	6.4	9.4
	2005	6	30	181	6	6.5	7	5.5	7.2	8.2	8.2	7.5	7.7	6.7
	2005	7	1	182	6.9	7.5	8.2	6.4	8.6	9.9	9.5	7.1	6.5	7.7
	2005	7	2	183	6.9	7.6	8.4	6.6	8.9	10.5	9.9	7.6	8.4	7.7
	2005	7	3	184	6.1	7.2	7.8	6.5	8.7	10.3	10	7.4	10	6.6
	2005	7	4	185	7.1	7.7	8.6	6.4	9.2	11.1	9.2	7.1	8.5	8
	2005	7	5	186	6.5	6.9	8.2	5.8	8	9.9	7.3	6.3	8.3	7.4
	2005	7	6	187	5.9	6.6	7.3	5.8	7.7	9	8.3	6.9	8	6.5
	2005	7	7	188	5.8	6.8	7.7	6.5	8.2	9.7	9.1	6.9	6.2	6.2
	2005	7	8	189	6.4	7.2	7.3	5.8	9	10	9.6	8.4	4.5	7
	2005	7	9	190	7	7.9	8	5.8	9.7	11.8	10.7	7.6	7.7	7.9
	2005	7	10	191	6.9	7.8	8.1	6.3	9.3	11.3	10.9	7.6	9.7	7.7
	2005	7	11	192	6.8	7.7	8.4	6.8	9.5	11.4	10.5	7.8	9.8	7.4
	2005	7	12	193	6.8	7.8	8.3	6.7	9.5	11.4	11	7.5	10	7.4
	2005	7	13	194	6.5	7.5	8.2	6.6	9.1	11.4	11	8	10.9	7
	2005	7	14	195	6.9	7.3	8.7	6.7	8.3	10.8	9.6	8.2	11.1	7.6
	2005	7	15	196	6.5	6.9	7.9	5.9	8.2	9.8	8	7.2	6.4	7.3
	2005	7	17	198	6	6.9	7	6.1	8.7	8.7	8.9	7.4	7	6.4
	2005	7	19	200	6.1	7.1	7.1	5.9	8.9	9.4	9.6	7.2	8.1	6.6
	2005	7	20	201	6.1	7.1	7.4	5.9	8.9	10.2	9.6	7.3	8.9	6.6
	2005	7	21	202	5.9	7.1	7.2	5.9	8.7	10.2	10.3	7.5	7.8	6.4
	2005	7	22	203	6.3	7.2	7.9	6.3	8.5	10.4	10.2	7.7	7.3	6.9
	2005	7	23	204	8.2	8.3	8.8	5.9	9.2	11.5	10.4	7.7	7	9.5
	2005	7	24	205	8.5	8.3	8.7	5.5	8.9	11.1	9.3	7.9	7.8	10.1
	2005	7	25	206	7.1	7.4	8.1	5.6	8.5	10.8	8.9	7.4	8.2	8.2
	2005	7	26	207	7.6	7.7	8.2	5.4	8.7	11	9.1	7.2	7	8.9
	2005	7	27	208	6.7	7.5	8	5.9	8.5	11.1	10.9	7.2	7.4	7.5
	2005	7	29	210	7.8	7.9	8.1	5.1	8.6	11.3	10.3	7.6	8.5	9.2
	2005	7	30	211	6.6	7.1	7.7	5.3	7.9	10.4	9.5	7.4	9	7.6
	2005	8	1	213	5.3	6.3	6.6	5.1	7.4	8.8	8.5	6.7	9.2	5.9
	2005	8	2	214	4.4	4.7	5.2	3.5	3.9	6.2	8.4	6.5	9.6	5
	2005	8	3	215	5.9	6.2	7	4.8	6.4	8.7	8.8	6.4	9.1	6.7
	2005	8	4	216	5.5	6	6.7	4.7	6.2	8.3	8.6	6.6	9.1	6.2
	2005	8	5	217	6.3	6.7	7.8	5.5	7.6	10	8.4	6.5	9	7.2
	2005	8	6	218	7	7	8.5	5.7	7.5	10.5	8.9	6.6	9.3	8.1
	2005	8	7	219	7	6.9	8.5	6	7.5	9.9	8.7	7	9.8	8
	2005	8	8	220	6.8	6.7	8.2	5.7	7.3	9.8	8.3	7.4	9.9	7.8
	2005	8	9	221	6.9	7.2	8.5	6.2	7.8	10.8	10.3	7.5	10	7.7
	2005	8	10	222	6.2	6.9	7.8	5.8	7.5	10.2	10.2	7.6	10.3	7
	2005	8	11	223	6.7	7.1	7.9	5.6	7.3	9.6	10.3	6.7	10.6	7.6
	2005	8	12	224	6.4	6.9	7.9	6.1	7.6	9.8	10	6.7	11.4	7
	2005	8	13	225	6	6.6	7.8	6.4	7.1	9.9	9.7	6.7	12	6.6
	2005	8	14	226	7.1	7.3	8.8	6.3	7.8	11	10.1	7.1	10.9	8
	2005	8	15	227	7.1	7	8.6	6.2	7.4	11	9.4	7.1	10.7	8.1
	2005	8	16	228	6.3	6.5	7.9	5.9	7	10.1	9	6.6	11	7
	2005	8	17	229	6.6	6.6	7.9	5.5	7.1	9.7	8.7	7.5	10.8	7.6
	2005	8	18	230	6.1	6.2	7.5	5.5	6.7	9.3	8	6.5	11	6.9
	2005	8	19	231	5.5	5.9	6.9	5.7	6.6	8.6	8.2	7.5	11.1	6
	2005	8	20	232	5.8	6.2	7.3	6	6.7	9.2	9.1	7.2	10.2	6.3
	2005	8	21	233	4.9	5.3	6.1	4.9	5.5	7.6	7.6	6.3	9.2	5.4
	2005	8	22	234	5.7	6.2	7.3	5.8	6.7	9.3	8.6	6	8.7	6.2
	2005	8	23	235	5.5	6.2	7	5.7	7.1	8.4	8.7	6.3	8.6	6
	2005	8	24	236	5.7	6.1	7.1	5.6	6.7	8.2	8.4	6.2	10.5	6.3
	2005	8	25	237	4.9	5.5	6.4	5.3	6.3	8.2	7.4	5.9	9.4	5.3
	2005	8	26	238	5.3	5.5	6.6	5	6.1	8.1	6.9	5.9	8.9	6
	2005	8	27	239	5.5	5.5	6.6	4.9	6	8.2	7.1	6	8.6	6.2
	2005	8	28	240	4.9	5.2	6.2	4.6	5.7	7.8	6.6	5.5	7.9	5.5
	2005	8	29	241	5.1	5.7	6.7	5.4	6.3	8.8	8.2	5.8	5.9	5.6
	2005	8	30	242	5	5.5	6.4	5.5	6	7.8	8	5.9	9.8	5.4
	2005	8	31	243	4.8	5.4	6.2	5.2	5.9	7.5	7.8	5.3	10.5	5.1
	2005	9	1	244	5.1	5.8	6.4	4.7	6.6	8.3	7.8	5.5	6	5.7
	2005	9	2	245	4.7	5.3	6	4.5	6.1	7.4	6.9	5.7	7.4	5.2
	2005	9	3	246	4.5	5.1	5.6	4	5.5	7.1	7	5.3	6	5.1
	2005	9	4	247	4.2	4.5	5.1	3.8	4.5	6	6.4	5.1	6.5	4.6
	2005	9	5	248	4.6	5	6	4.5	6	7.5	5.7	4.3	6.2	5
	2005	9	6	249	4.6	5.1	6	4.7	6.1	7.5	5.7	5	7.3	5.1
	2005	9	7	250	5	5.3	6.3	4.6	6.1	7.9	6.4	5.6	8	5.7
	2005	9	8	251	4.9	5.3	6.3	4.9	6.1	8.2	6.9	5.4	7.8	5.4
	2005	9	9	252	4.4	4.8	5.6	4.4	5.5	7.2	6	5.2	6.5	4.9
	2005	9	10	253	4.4	5	5.8	4.5	5.8	7.8	6.6	5.1	6.4	4.8
	2005	9	11	254	4.1	4.8	5.5	4.4	5.7	7.4	6.1	5.1	6.6	4.5
	2005	9	12	255	4.1	4.9	5.6	4.6	5.8	7.5	6.6	4.7	7.3	4.4
	2005	9	13	256	4.7	5.1	6	4.5	5.9	8	6.6	5.1	7.7	5.3
	2005	9	14	257	4.5	5.3	5.7	3.9	6.5	8	6.8	5.1	5.7	5.1
	2005	9	15	258	4.2	4.9	5.2	3.8	6	6.7	6.3	5	5.8	4.6
	2005	9	16	259	3.8	4.7	4.8	3.5	5.7	6.3	5.9	4.8	6.5	4.2
	2005	9	19	262	4.7	5	5.3	4	5.5	5.6	6.5	5.6	7.6	5.3
	2005	9	20	263	3.9	4.8	5.1	3.9	5.7	6.8	7.3	4.7	7.2	4.2
	2005	9	21	264	3.8	4.5	4.8	3.9	5.1	5.6	6.5	5	5.8	4.1
	2005	9	22	265	3.7	4.6	4.9	3.9	5.6	6.6	6.4	4.9	5.9	3.9
	2005	9	23	266	3.5	4.1	4.7	3.6	4.9	5.7	5.4	4.1	6.4	3.8
	2005	9	24	267	3.5	4	4.5	3.7	4.6	5.9	5.7	5.1	4.6	3.8
	2005	9	26	269	3.3	3.8	4.3	3.5	4.6	5.6	5	4.3	2.6	3.6
	2005	9	27	270	3.7	4.1	4.8	3.5	4.9	6.3	5.2	4.3	2.5	4.1
	2005	9	28	271	3.2	3.7	3.9	2.5	3.3	4.3	5.2	4.1	2.1	3.7
	2005	9	29	272	2.5	3.4	3.4	2.1	2.8	4	4.9	3.2	3.4	2.9
	2005	9	30	273	3.1	3.7	4	2.7	4.2	5.1	4.4	3.5	4.1	3.5
	2005	10	1	274	3.4	3.9	4.4	2.9	4.7	5.7	4.6	3.8	2.1	3.8
	2005	10	2	275	3	3.6	3.9	2.9	4.1	4.7	4.8	3.7	1.9	3.3
	2005	10	3	276	2.6	3.1	3.3	2.4	3	3.4	4.6	3.1	3.1	2.9
	2005	10	4	277	2.9	3.5	3.8	2.9	4.3	4.8	4.4	3.6	5	3.2
	2005	10	5	278	3	3.6	4	3.1	4.3	5.7	4.8	3.5	5.2	3.2
	2005	10	6	279	3.1	3.6	4.1	3.1	4.5	5.8	4.5	3.6	5.2	3.4
	2005	10	7	280	3.2	3.6	4.2	3.1	4.5	5.9	4.5	3.8	5.2	3.6
	2005	10	8	281	2.9	3.3	3.8	2.7	3.9	5.3	4.3	3.3	6.4	3.2
	2005	10	9	282	2.6	3.3	3.8	2.7	4.5	5.4	3.9	3.5	7.2	2.9
	2005	10	10	283	2.4	3.3	3.6	2.6	4.1	5.2	4.3	3.5	5.2	2.6
	2005	10	11	284	2.4	3.2	3.5	2.7	3.8	5.3	5	3.9	5.2	2.5
	2005	10	12	285	2.7	3.4	3.7	2.8	4.1	5.6	4.8	3.7	6.4	2.9
	2005	10	13	286	2.6	3.3	3.7	2.8	3.9	5.6	5	3.5	4.5	2.9
	2005	10	14	287	2.4	3	3.3	2.4	3	4.8	5.3	3.5	6.3	2.6
	2005	10	15	288	2.9	3.2	3.7	2.5	3.8	5.3	4.3	3.5	3.9	3.3
	2005	10	16	289	2.4	2.9	3.2	2.3	3.4	4.4	3.7	2.9	3.3	2.7
	2005	10	17	290	2.2	3	3	1.8	3.8	4.1	3.1	2.5	3.8	2.5
	2005	10	18	291	1.9	2.7	2.7	1.7	2.5	3.3	3.5	2.5	2.4	2.2
	2005	10	19	292	1.1	1.7	1.6	1.1	0.7	1.2	2.3	2.1	2.6	1.2
	2005	10	20	293	1.8	2.2	2.5	1.8	2.9	2.9	2	2	1.4	2
	2005	10	21	294	2.1	2.4	2.7	1.8	2.9	3.3	2.2	2.2	2.6	2.5
	2005	10	23	296	1.7	2.5	2.6	1.8	3.4	3.7	2.8	2.5	2.7	1.8
	2005	10	24	297	1.7	2.5	2.7	1.9	3.5	3.9	3	2.8	6.2	1.9
	2005	10	25	298	1.8	2.5	2.7	1.9	3.4	3.9	3	2.8	2.5	2
	2005	10	26	299	1.9	2.6	2.8	1.8	3.3	4.3	3.7	2.9	3.9	2.1
	2005	10	27	300	2	2.7	2.8	1.7	3.4	4.1	3.5	3	4.8	2.2
	2005	10	28	301	1.8	2.6	2.7	1.6	3.4	4.1	3.2	2.9	3.6	2
	2005	10	29	302	1.5	2	2	0.9	0.2	1.1	2.4	2.2	4.5	1.8
	2005	10	30	303	1.5	1.7	1.8	0.9	0.2	1	2	1.3	5.5	1.8
	2005	10	31	304	1.1	1.6	1.7	1.1	1.2	1.8	2.1	1.7	4.5	1.2
	2005	11	1	305	1.3	1.9	2	1.2	2.7	2.5	1.7	1.9	-999	1.5
	2005	11	2	306	1.2	1.7	1.8	1.1	1.6	2	1.8	1.9	-999	1.4
	2005	11	3	307	1.2	1.6	1.7	1	0.8	1.5	2	1.5	-999	1.3
	2005	11	4	308	1.2	1.7	1.8	0.9	0.4	1.2	2.1	1.8	-999	1.4
	2005	11	5	309	1.2	1.5	1.6	1.1	1.2	1.6	1.8	1.6	-999	1.4
	2005	11	6	310	1.3	1.6	1.7	1.2	1.6	1.8	1.8	1.6	-999	1.4
	2005	11	7	311	1	1.3	1.3	0.9	0.5	0.9	1.8	1.2	-999	1.1
	2005	11	8	312	1.3	1.6	1.8	1.3	2.2	2.2	2.2	2	-999	1.4
	2005	11	9	313	1.3	1.5	1.6	1.4	2	1.8	2.2	1.9	-999	1.4
	2005	11	10	314	1.5	1.6	1.7	1.5	2	1.8	2.4	2	-999	1.6
	2005	11	11	315	1.5	1.6	1.8	1.4	2.1	2	2.2	2	-999	1.7
	2005	11	12	316	1.5	1.8	2	1.1	2.3	2.5	2.1	1.8	-999	1.7
	2005	11	13	317	1.3	1.6	1.7	1.1	1.9	2.3	2	1.8	-999	1.5
	2005	11	14	318	1.1	1.5	1.6	1.1	2	2	2	1.7	-999	1.1
	2005	11	15	319	1	1.4	1.4	1	1.2	1.6	2	1.7	-999	1.1
	2005	11	16	320	0.9	1.2	1.2	0.9	1	1.3	1.8	1.7	-999	1
	2005	11	17	321	1	1.3	1.3	1.1	1.7	1.6	1.9	1.7	-999	1.1
	2005	11	18	322	1	1.2	1.3	0.7	0.1	0.7	1.7	1.5	-999	1.1
	2005	11	19	323	0.9	1.3	1.4	0.8	0.9	1.4	1.7	1.3	-999	1.1
	2005	11	20	324	0.8	1.3	1.3	0.7	0.1	0.6	1.5	0.8	-999	0.9
	2005	11	21	325	0.8	1.2	1.2	0.7	0	0.4	1.3	0.8	-999	0.9
	2005	11	22	326	0.9	1.3	1.4	0.7	0.7	0.9	1.3	1.2	-999	1.1
	2005	11	23	327	0.8	1.2	1.2	0.7	1.4	0.8	1.1	1.2	-999	0.9
	2005	11	24	328	1.1	1.4	1.5	0.8	1.8	1.2	1.5	1.5	-999	1.3
	2005	11	25	329	1.1	1.3	1.4	0.8	1.3	1	1.5	1.5	-999	1.2
	2005	11	27	331	0.9	1.4	1.4	0.8	1.1	1.3	2.2	1.5	-999	1
	2005	11	28	332	1.4	1.7	1.8	0.9	1.6	2.1	2.7	1.9	-999	1.6
	2005	11	29	333	1.3	1.9	1.9	0.8	0.9	1.7	2.4	1.3	-999	1.5
	2005	11	30	334	1	1.6	1.7	0.7	1.9	2.5	2.4	1.7	-999	1.2
	2005	12	1	335	1	1.7	1.7	0.7	1.8	2.3	2.5	1.7	-999	1.2
	2005	12	2	336	1.3	1.8	1.8	0.7	1.3	1.8	2.4	1.6	-999	1.6
	2005	12	3	337	1.6	2.1	2.2	0.7	0.7	1.5	2.2	1.1	-999	2
	2005	12	4	338	1	1.6	1.6	0.7	1.8	2.4	2.6	1.8	-999	1.1
	2005	12	5	339	1.1	1.5	1.6	0.7	1.7	2.4	2.3	1.6	-999	1.3
	2005	12	6	340	1	1.2	1.2	0.9	1.4	1.3	2.2	1.7	-999	1.1
	2005	12	7	341	1.1	1.6	1.7	0.7	1.7	2.3	2.4	1.7	-999	1.4
	2005	12	8	342	1.2	1.6	1.7	0.7	1.8	2.6	2.4	1.7	-999	1.4
	2005	12	9	343	1.4	1.6	1.7	0.7	1.7	2.4	2.3	1.7	-999	1.7
	2005	12	10	344	1	1	1.1	0.7	0.7	0.7	1.7	1.9	-999	1.1
	2005	12	11	345	1.1	1.6	1.7	0.7	1.8	2.4	2.5	1.8	-999	1.4
	2005	12	12	346	1.4	1.6	1.7	0.7	1.9	2.4	2.5	1.8	-999	1.7
	2005	12	13	347	1.3	1.5	1.6	0.7	1.7	2	2.1	1.6	-999	1.6
	2005	12	14	348	1.3	1.6	1.7	0.6	1.8	2.4	2.2	1.6	-999	1.5
	2005	12	15	349	0.9	1.1	1.2	0.7	0.5	0.9	1.5	1	-999	1
	2005	12	16	350	1.1	1.4	1.5	0.6	0.5	0.8	1.5	0.8	-999	1.3
	2005	12	17	351	1	1.5	1.5	0.6	0.6	0.9	1.5	0.8	-999	1.2
	2005	12	18	352	1.3	1.6	1.7	0.7	0.1	0.6	1.6	1	-999	1.5
	2005	12	19	353	1.3	1.8	1.8	0.6	0.5	0.8	1.5	0.9	-999	1.6
	2005	12	20	354	1.7	1.9	2.1	0.7	0.3	0.9	1.6	1.1	-999	2.1
	2005	12	21	355	1.5	1.8	2	0.5	1	1.5	1.5	0.9	-999	1.9
	2005	12	22	356	0.9	1.4	1.5	0.4	1.5	1.6	1.3	1	-999	1.1
	2005	12	23	357	0.9	1.4	1.4	0.6	0.2	0.6	1.2	0.9	-999	1.1
	2005	12	24	358	0.9	1.3	1.3	0.6	-0.1	0.2	0.9	0.9	-999	1
	2005	12	25	359	0.7	1.2	1.2	0.5	0.2	0.3	0.8	0.5	-999	0.9
	2005	12	26	360	0.7	1	1.1	0.4	1.5	0.7	0.7	0.8	-999	0.9
	2005	12	27	361	0.7	1	1.1	0.4	1.3	0.6	0.6	0.8	-999	0.8
	2005	12	28	362	0.8	1.1	1.2	0.4	1.5	0.9	0.8	1	-999	1
	2005	12	30	364	0.8	0.9	1	0.6	1.4	0.7	1.1	1.2	-999	1
	2005	12	31	365	0.7	0.9	0.9	0.6	0.5	0.3	1.1	0.9	-999	0.8
	2006	1	1	1	0.8	1.1	1.2	0.5	1.2	1.1	1.1	1.2	-999	1
	2006	1	2	2	0.8	1.1	1.1	0.6	0.3	0.5	1	0.6	-999	1
	2006	1	3	3	0.9	0.9	1	0.7	1.2	0.9	1.3	1.2	-999	1.1
	2006	1	4	4	1.1	1.3	1.3	0.6	1.3	1.1	1.3	1.3	-999	1.3
	2006	1	5	5	0.5	0.6	0.6	0.6	0.1	0.1	1.1	0.9	-999	0.6
	2006	1	6	6	0.9	1.1	1.2	0.7	0.1	0.4	1.4	0.8	-999	1.1
	2006	1	7	7	0.6	0.8	0.8	0.7	0.2	0.4	1.4	0.7	-999	0.6
	2006	1	8	8	1	1.2	1.3	0.6	0.3	0.5	1.1	0.7	-999	1.1
	2006	1	9	9	1.1	1.2	1.3	0.7	1.6	1.3	1.2	1.2	-999	1.3
	2006	1	10	10	1	1.2	1.3	0.6	0.2	0.4	0.9	0.7	-999	1.2
	2006	1	11	11	0.8	1	1.1	0.6	0.1	0.2	0.9	0.7	-999	0.9
	2006	1	12	12	0.9	1.1	1.2	0.7	1	1	1.2	1	-999	1.1
	2006	1	13	13	0.6	0.8	0.8	0.6	0.4	0.3	0.9	0.7	-999	0.6
	2006	1	14	14	0.7	1	1	0.7	1.4	1	1	1	-999	0.7
	2006	1	15	15	0.6	0.9	0.9	0.7	1.4	0.8	0.9	1	-999	0.7
	2006	1	16	16	0.7	1	1.1	0.7	1.7	1.1	0.9	1.1	-999	0.7
	2006	1	17	17	0.8	1.2	1.2	0.6	1.7	1	0.9	1.2	-999	0.9
	2006	1	18	18	0.6	0.9	0.9	0.5	0.3	0.1	0.4	0.6	-999	0.7
	2006	1	19	19	0.5	0.5	0.5	0.6	0.2	-0.1	0.7	0.7	-999	0.5
	2006	1	20	20	0.4	0.4	0.4	0.6	-0.1	-0.1	0.7	0.7	-999	0.4
	2006	1	21	21	0.6	0.7	0.7	0.8	1.1	-0.3	0.6	0.8	-999	0.6
	2006	1	22	22	0.7	0.9	1	0.7	1	0.4	0.5	0.8	-999	0.8
	2006	1	23	23	0.7	0.9	0.9	0.6	0.2	0.1	0.5	0.3	-999	0.8
	2006	1	24	24	0.6	0.8	0.8	0.6	0.3	0.2	0.7	0.8	-999	0.7
	2006	1	25	25	0.6	0.8	0.8	0.7	0.1	0.2	1	0.8	-999	0.7
	2006	1	26	26	0.7	0.9	0.9	0.8	0.6	0.6	1.2	1.2	-999	0.8
	2006	1	27	27	1	1.2	1.2	0.9	1.4	1	1.1	1.2	-999	1.1
	2006	1	28	28	0.8	0.9	0.9	1.1	1.2	0.2	1	1.2	-999	0.8
	2006	1	29	29	1.2	1.4	1.6	0.9	1.9	1.1	0.8	1.3	-999	1.4
	2006	1	30	30	0.8	0.9	0.9	1.1	1.3	0	0.8	1.2	-999	0.8
	2006	1	31	31	1.3	1.4	1.6	0.9	1.9	1.1	0.7	1.2	-999	1.6
	2006	2	1	32	0.9	1	1	1.1	1.3	0.4	1	1.2	-999	0.9
	2006	2	2	33	0.5	0.5	0.5	0.6	-0.2	0	1.1	1.1	-999	0.5
	2006	2	3	34	0.6	0.6	0.6	0.8	0.2	0.1	1.1	0.8	-999	0.6
	2006	2	4	35	1	1	1.1	1.3	1.5	0.2	1.1	1.7	-999	1
	2006	2	5	36	0.7	0.8	0.7	0.9	0.5	0.2	1.2	1.3	-999	0.7
	2006	2	6	37	0.6	0.6	0.6	0.7	0	0.2	1.6	1.1	-999	0.6
	2006	2	7	38	0.9	1	1.1	0.7	-0.1	0.3	1.5	1.2	-999	1
	2006	2	8	39	0.8	1	1.1	0.8	0	0.5	1.5	1.2	-999	0.9
	2006	2	9	40	1	1.3	1.3	1	1.1	0.7	1.2	1.3	-999	1.1
	2006	2	10	41	1	1.2	1.2	0.9	0.6	0.6	1.3	1.3	-999	1.1
	2006	2	11	42	1.3	1.3	1.4	0.8	0.3	0.7	1.4	1.6	-999	1.6
	2006	2	12	43	1	1.3	1.3	1	0.9	0.7	1.4	1.5	-999	1.1
	2006	2	13	44	0.5	0.6	0.6	0.7	-0.1	0.1	1.3	1	-999	0.6
	2006	2	14	45	0.9	1	0.9	1.2	0.8	0.3	1.5	1.4	-999	0.9
	2006	2	15	46	0.8	0.9	0.9	1.1	0.8	0.2	1.1	1.3	-999	0.8
	2006	2	16	47	1.1	1.4	1.5	1.4	1.8	0.5	0.7	1.2	-999	1.2
	2006	2	17	48	1.1	1.3	1.4	1.3	1.6	0.5	0.6	1.3	-999	1.2
	2006	2	18	49	1.2	1.4	1.5	1.2	1.5	0.8	0.8	1.4	-999	1.4
	2006	2	19	50	1.6	2	2.2	1.7	2.8	2.2	1.6	1.8	-999	1.7
	2006	2	20	51	1.5	1.7	1.9	1.7	2.2	1.6	1.6	1.8	-999	1.6
	2006	2	21	52	1.5	1.7	1.9	1.7	2	1.5	1.8	1.8	-999	1.6
	2006	2	22	53	2.2	2.3	2.6	2.2	3	2.2	2.1	2.6	-999	2.4
	2006	2	23	54	2.1	2.3	2.5	2.3	3	2.3	2.2	2.6	-999	2.3
	2006	2	24	55	2.1	2.2	2.5	2.2	2.8	2.2	2.1	2.5	-999	2.3
	2006	2	25	56	1.9	2	2.2	2.1	2.4	1.9	2.3	2.4	-999	2
	2006	2	26	57	1.6	2	2.1	2.1	2.3	1.6	2.3	2.5	-999	1.8
	2006	2	27	58	1.6	1.8	1.9	1.9	1.9	1.4	2	2.2	-999	1.7
	2006	2	28	59	1.6	1.8	1.9	2	2.1	1.2	2	2.2	-999	1.7
	2006	3	1	60	1.4	1.6	1.6	1.8	1.5	1	2.3	2.4	-999	1.5
	2006	3	2	61	2	2.3	2.5	2.2	2.8	2.3	2.4	2.4	-999	2.1
	2006	3	3	62	1.2	1.4	1.3	1.3	1	0.8	1.8	2.2	-999	1.2
	2006	3	4	63	2.1	2.3	2.6	2.6	2.9	1.8	2.2	2.4	-999	2.2
	2006	3	5	64	1.5	1.7	1.7	1.8	1.6	1.2	2.1	2.5	-999	1.6
	2006	3	6	65	2.3	3	3.1	2.4	4.1	3.4	2.5	2.8	-999	2.5
	2006	3	7	66	2.3	2.8	3	2.3	3.6	2.9	2.4	2.7	-999	2.5
	2006	3	8	67	1	1.4	1.4	0.9	0	0.8	2.2	1.8	-999	1.1
	2006	3	9	68	1.7	2	2.1	1.4	1.3	1.5	1.7	1.8	-999	2
	2006	3	10	69	1.9	2.3	2.5	1.8	2.5	2.1	1.5	2	-999	2.1
	2006	3	11	70	2.3	2.6	3	2.4	3.4	2.5	1.6	2.3	-999	2.5
	2006	3	12	71	2.5	2.8	3.2	2.4	3.4	2.9	2	2.5	-999	2.7
	2006	3	13	72	2.1	2.3	2.4	2.7	2.5	1.4	2.3	2.9	-999	2.1
	2006	3	14	73	2.1	2.3	2.5	2.6	2.5	1.7	2.7	3.3	-999	2.2
	2006	3	15	74	1.7	2.1	2.2	1.8	1.8	1.9	2.3	2.1	-999	1.9
	2006	3	16	75	2.4	2.9	3	2.4	3.6	2.6	2	2.6	-999	2.6
	2006	3	17	76	2.5	3.2	3.3	2.5	4.2	3.3	2.2	2.7	-999	2.7
	2006	3	18	77	1.9	2.3	2.5	2	2.3	2	2.1	2.5	-999	2.1
	2006	3	19	78	1.3	1.5	1.5	1.4	1	0.9	1.6	1.6	-999	1.4
	2006	3	20	79	2.4	2.8	3.1	3.1	3.4	1.8	1.8	2.8	-999	2.5
	2006	3	21	80	1.6	1.8	1.9	1.5	1.2	1.5	2.1	2.3	-999	1.8
	2006	3	22	81	3.3	3.5	4	2.8	4	3.7	2.7	3.3	-999	3.8
	2006	3	23	82	2.9	3.2	3.6	2.8	3.6	3.3	3.1	3.5	-999	3.3
	2006	3	24	83	2.9	3.1	3.5	3.1	3.3	2.8	3.4	3.6	-999	3.1
	2006	3	25	84	2.8	3.1	3.4	2.6	2.9	3.3	3.4	2.6	-999	3.1
	2006	3	26	85	2.4	2.6	2.8	2	2.1	2.4	2.7	2.9	-999	2.7
	2006	3	27	86	2.9	3.4	3.7	2.9	4.2	3.4	2.5	3.1	-999	3.1
	2006	3	28	87	2.4	2.7	2.9	2.6	2.7	2.4	2.8	3.2	-999	2.6
	2006	3	29	88	3.3	3.7	4.2	3.4	4.5	4.1	3.3	3.6	-999	3.6
	2006	3	30	89	3.4	3.9	4.5	3.5	5	4.7	3.3	3.9	-999	3.7
	2006	3	31	90	3.3	3.5	4.1	3.3	4.1	3.6	2.9	3.5	-999	3.6
	2006	4	1	91	1.4	1.7	1.6	2	1.3	1.2	3.2	3.6	1.4	1.5
	2006	4	2	92	1.4	1.6	1.7	1.2	0.5	1.2	2.7	2.4	2.3	1.6
	2006	4	3	93	2.2	2.6	2.7	1.8	1.8	1.9	2.1	2.3	-999	2.6
	2006	4	4	94	3.1	3.5	4	3.2	4.3	3.3	2.4	2.9	-999	3.4
	2006	4	5	95	1.8	2.2	2.3	1.8	1.5	1.7	2.3	2.7	0.7	2
	2006	4	6	96	2.7	3.2	3.5	3	3.6	2.8	2.6	2.8	1.3	3
	2006	4	7	97	3.1	3.3	3.7	3.2	3.5	3.2	3.2	3.8	0.3	3.4
	2006	4	8	98	3.4	3.7	4.2	3.9	4.2	3.7	3.6	3.9	3.6	3.6
	2006	4	9	99	2.7	2.9	3.2	3.3	2.9	2.4	3.9	3.7	4.5	2.8
	2006	4	10	100	2.5	2.7	2.9	2.9	2.5	2.5	4.3	4.2	4.4	2.6
	2006	4	11	101	2.6	3.1	3.3	2.7	2.9	3.3	3.8	3.4	4.1	2.8
	2006	4	12	102	3.8	4.2	4.8	4.4	4.8	3.8	4	4.4	3.2	4
	2006	4	13	103	3.5	3.8	4.3	3.9	4.2	3.9	4.2	4.6	3.7	3.7
	2006	4	14	104	3.7	4.2	4.5	3.4	4.2	4.5	5.1	4.6	3.8	4.2
	2006	4	15	105	2.2	2.5	2.6	1.9	1.4	2.7	5.1	3.6	4.7	2.4
	2006	4	16	106	3.9	4.5	4.9	4.1	5.3	5.2	5	4.6	4.1	4.2
	2006	4	17	107	3.9	4.1	4.7	3.8	4.2	4.7	4.9	4.4	5.5	4.3
	2006	4	18	108	3.7	4	4.5	4.5	4.3	3.6	4.4	4.4	4.4	3.8
	2006	4	19	109	4.1	4.5	5.1	4.6	5.1	4.8	4.6	4.5	2.8	4.3
	2006	4	20	110	3.4	3.6	3.9	4.3	3.4	2.6	5.1	4.7	3	3.4
	2006	4	21	111	4.2	4.7	5.4	4.9	5.4	5.1	5	4.6	4.8	4.4
	2006	4	22	112	4.2	4.6	5.3	4.8	5.3	4.7	4.4	5.1	4.2	4.5
	2006	4	23	113	3.6	4	4.5	4.2	4.2	4	4.6	3.9	5	3.8
	2006	4	24	114	2.6	3.5	3.5	2.7	3.1	3.7	4.4	3.9	3	2.8
	2006	4	25	115	2.9	3.3	3.4	2.1	2.2	2.8	2.9	2.4	3.4	3.4
	2006	4	26	116	4.2	4.8	5.4	4.4	6.2	5	3.2	3.6	0.8	4.5
	2006	4	27	117	3.9	4.3	5	4.8	5.2	3.4	3.2	4	3.6	4
	2006	4	28	118	3.8	4.1	4.8	4	4.7	4.4	3.3	4.3	4	4.2
	2006	4	29	119	3.4	3.8	4.3	3.8	4	3.8	4.2	4.5	3.3	3.6
	2006	4	30	120	4.2	4.7	5.4	4.8	5.6	5.2	4.4	4.6	4	4.4
	2006	5	1	121	4.1	4.6	5.3	4.6	5.4	5.1	4.5	4.6	2.7	4.3
	2006	5	2	122	3.1	3.6	3.9	3.3	3.6	3.9	4.5	4.4	3.9	3.3
	2006	5	3	123	3.6	3.9	4.3	3.5	3.9	4	4.2	4.9	4.1	3.9
	2006	5	4	124	4.7	5.1	6.1	5	6.1	5.5	4.3	4.8	2.7	5.2
	2006	5	5	125	4.5	4.7	5.3	3.9	4.6	4.8	4.8	5	4.4	5.1
	2006	5	6	126	2.9	3.1	3.3	2.4	2.2	3.2	4.9	4.5	0.9	3.2
	2006	5	7	127	3.8	4.2	4.7	3.7	4.4	4.6	4.5	4.9	2.9	4.2
	2006	5	8	128	4.1	4.7	5.3	4.5	5.4	5.3	4.9	4.1	2.3	4.4
	2006	5	9	129	4.6	5.1	5.8	5.5	6	4.2	4.3	4.9	5.5	4.8
	2006	5	10	130	4.4	4.9	5.7	5.4	5.5	4.2	4.3	5.1	4.3	4.7
	2006	5	11	131	4.5	4.9	5.6	5.5	5.4	4.4	5.1	5.3	5.7	4.6
	2006	5	12	132	4.9	5.2	6.1	6.1	5.5	4.4	5.7	6.1	5.8	5.1
	2006	5	13	133	5.2	5.6	6.6	5.9	6.1	5.3	6	5.9	5.5	5.5
	2006	5	14	134	5	5.6	6.5	5.8	6.7	6.2	5.4	5.1	6.7	5.3
	2006	5	15	135	4.9	5.9	6.3	5.5	7.8	7.5	5.8	5.6	5.9	5.1
	2006	5	16	136	4.8	5.4	6.2	5.2	6.1	6.6	6.2	6.1	7.8	5.2
	2006	5	17	137	4.5	4.9	5.6	5.7	5.2	4.1	5.1	5.3	7.5	4.6
	2006	5	18	138	4.6	4.9	5.7	4.5	5.3	5.5	4.9	5.5	3.9	5.2
	2006	5	19	139	5.2	5.7	6.7	5.9	6.5	6.2	5.6	5.6	4.8	5.6
	2006	5	20	140	5.3	5.6	6.7	5.5	6.1	6.3	6.3	5.9	6	5.8
	2006	5	21	141	5.7	6.2	7.2	6	7.1	7.4	6.9	6.1	6.4	6.2
	2006	5	22	142	5.8	6.1	7.2	5.8	6.6	8.3	8.2	7.6	7.7	6.4
	2006	5	23	143	5.6	6.5	6.8	5.9	8	7.7	7.4	6.2	7.2	6
	2006	5	24	144	6.3	6.8	8.1	6.4	7.9	9.1	7.5	6.1	8.4	6.8
	2006	5	25	145	6.2	6.9	7.6	6	8.3	9	8	6.7	5.9	6.8
	2006	5	26	146	4.7	5.5	5.9	5	6	6.6	7.6	6	7.5	5.1
	2006	5	27	147	5.5	6.1	6.8	6	6.9	6.6	7.4	6.2	7.3	5.9
	2006	5	28	148	6.1	6.4	7.6	6.3	7.2	7.2	7.1	6.5	9.7	6.7
	2006	5	29	149	6.9	7.1	8.7	6.8	8.1	8.5	7.4	6.8	8.1	7.7
	2006	5	30	150	6.8	7	8.5	6.7	8	9.2	8.2	7.5	7.6	7.5
	2006	5	31	151	6.5	7	7.9	6.6	8	8.5	8.8	7.6	6.9	7.1
	2006	6	1	152	6.3	6.8	7.9	6.8	7.1	8.4	9.8	7.8	9.4	6.8
	2006	6	2	153	6.5	6.8	8.1	6.5	6.9	9.6	10.7	7.7	10.3	7.2
	2006	6	3	154	6.2	6.8	7.7	6.3	7.3	8.9	10.4	7.9	11	6.8
	2006	6	4	155	6	6.5	7.1	6.5	6.6	7	10.7	8.1	10.7	6.3
	2006	6	5	156	6.9	7.7	8.4	6.5	8.6	11.3	11.4	8.1	10.3	7.6
	2006	6	6	157	8.1	8.2	9.4	6.7	8.6	10.9	10.8	8	10.3	9.3
	2006	6	7	158	6.4	7	7.7	7.1	7.6	7.5	9.5	8.1	11.3	6.8
	2006	6	8	159	5.4	5.9	6.8	6.5	6.5	6.5	7.3	7.4	9.7	5.6
	2006	6	9	160	5.4	5.9	6.8	6.5	6.5	6.2	6.8	6.6	6.3	5.5
	2006	6	10	161	5.6	6.3	7.2	6.4	7.6	7.5	6.8	6.5	6.5	5.8
	2006	6	11	162	5.8	6.4	7.3	6.7	7.2	6.7	7.2	6.3	8.2	6.1
	2006	6	12	163	6.3	6.5	7.9	6.5	7.3	7.4	7	6.9	9.1	6.9
	2006	6	13	164	6.8	7.1	8.4	6.6	7.9	9	8.3	7.3	8.7	7.6
	2006	6	14	165	6.1	6.6	7.9	6.3	7.6	8.9	7.7	6.5	7.6	6.7
	2006	6	15	166	5.7	6.5	7.3	6.1	8	8.7	7.2	6.8	7.6	6.2
	2006	6	16	167	5.8	6.5	7	6	8.1	7.8	7.1	6.6	7.2	6.2
	2006	6	17	168	6.3	6.9	7.7	6.1	8.4	9.4	7.8	7.4	7	7
	2006	6	18	169	7.4	7.6	8.5	6.1	8.6	9.9	8.4	7.6	7.9	8.5
	2006	6	19	170	8.8	8.7	10	6.5	9.6	11.8	9.4	7.3	8	10.4
	2006	6	20	171	7.4	7.8	8.6	6.6	9.1	10.3	9	7.8	8.6	8.3
	2006	6	21	172	7	7.4	7.9	6.1	8.8	9.5	8.8	7.9	8	7.8
	2006	6	22	173	6.3	7.3	7.6	6	9.1	10.9	9.8	8	8.2	7
	2006	6	23	174	5.9	6.9	7.3	5.9	8.4	9.8	8.8	7.5	6.8	6.4
	2006	6	24	175	6.1	7	7.1	5.5	8.4	9.6	9	7.5	7.9	6.8
	2006	6	25	176	5.8	6.8	7.1	5.9	8.2	9.1	9.2	7.5	6.9	6.2
	2006	6	26	177	6.2	7.2	7.3	5.9	8.6	9.8	9.7	7.6	6.8	6.8
	2006	6	27	178	6.7	7.3	7.8	5.7	8.6	10.4	9	7.3	6.8	7.6
	2006	6	28	179	6.9	7.2	7.5	5.1	7.8	9.6	8.5	7.2	5.4	8
	2006	6	29	180	7.8	8	8.5	5.7	9.1	10.6	8.2	6.8	6.3	9.1
	2006	6	30	181	5.9	6.4	7	5.4	7.2	8.1	8	6.9	5.9	6.5
	2006	7	1	182	5.8	6.1	6.6	4.4	5.7	8.1	9.6	7.4	6.2	6.7
	2006	7	2	183	6.5	7.1	7.7	6.2	7.9	9.1	9.7	6.9	6.1	7.1
	2006	7	3	184	5.6	6.5	7	6	7.5	8.3	9.4	6.2	6.1	6
	2006	7	4	185	6.6	7.1	7.9	5.9	8.3	9.8	8.4	6.8	5.1	7.4
	2006	7	5	186	6.3	6.6	7.7	5.7	7.3	8.8	7.6	6.6	5.7	7.1
	2006	7	6	187	5.4	6.1	6.7	5.1	6.9	8.3	7.7	6.6	5.3	6
	2006	7	7	188	5.2	6	6.6	6	6.7	7	8	6.1	6.5	5.5
	2006	7	8	189	5.8	6.9	6.9	5.4	8.8	9.7	8.1	6.6	5.4	6.5
	2006	7	9	190	6.3	7.1	7.2	5.2	8.6	9.9	8.3	6.6	7.2	7.1
	2006	7	10	191	6.1	6.9	7.2	5.3	8	9.7	9	7.2	7.3	6.9
	2006	7	11	192	5.7	6.5	7	5.3	7.2	9.2	9.5	7.8	9.2	6.3
	2006	7	12	193	6.3	7.2	7.6	6.1	8.4	10.2	10.6	8.1	9.2	7
	2006	7	13	194	6.3	7.1	7.6	6.4	8.2	9.3	10.4	8.3	8.4	6.8
	2006	7	14	195	6.1	6.5	7.6	6.5	7	7.6	8.7	7.4	9.3	6.6
	2006	7	15	196	6.2	6.7	7.4	6.1	7.6	8	8.2	7.1	6.8	6.8
	2006	7	16	197	6.5	7.3	7.5	5.8	8.9	10.2	9.5	7	5.3	7.2
	2006	7	17	198	5.6	6.7	6.8	5.5	8.3	9.4	9.3	7.1	7.1	6.1
	2006	7	18	199	5.7	6.9	7	5.6	8.3	10	10.5	7.2	6.9	6.2
	2006	7	19	200	5.7	6.9	6.9	5.3	8.2	9.7	10.2	6.7	9.1	6.3
	2006	7	20	201	5.7	6.7	6.9	5.5	7.8	9.4	10	7.4	9.1	6.3
	2006	7	21	202	5.2	6.2	6.2	5.3	7	7.4	8.9	7.2	8.8	5.7
	2006	7	22	203	5.4	6.1	6.6	5.1	6.9	8.3	8.3	6.8	7	5.9
	2006	7	23	204	7.4	7.5	8	5.2	8.2	10.2	8.5	6.8	6.4	8.6
	2006	7	24	205	8.1	8	8.4	5.1	8.3	10.8	9.1	6.8	6.3	9.7
	2006	7	25	206	6.8	7.2	7.8	5.3	7.8	10.1	9.1	6.7	7.6	7.8
	2006	7	26	207	7.4	7.5	8	5.1	7.9	10.4	9.5	7.1	7.3	8.7
	2006	7	27	208	6.3	7	7.5	5.5	8.1	9.8	8.9	7.3	7.2	7.1
	2006	7	28	209	7	7.5	8	5.6	8.5	10.7	9.8	7	5.7	8
	2006	7	29	210	7.4	7.7	7.9	5.1	8.6	10.8	9.3	6.4	5.9	8.7
	2006	7	30	211	6.4	7	7.6	5.3	8	10.2	8.8	6.3	6.8	7.3
	2006	7	31	212	6.3	7	7.3	5.2	8	9.6	8.8	6.8	7.8	7.2
	2006	8	1	213	5.4	6.4	6.7	5.3	7.7	8.7	8.1	6.9	6.8	6
	2006	8	2	214	5.7	6.2	7.1	5.7	7	8.1	8	6.7	6.3	6.3
	2006	8	3	215	6.2	6.6	7.3	5.4	7	8.8	9.1	7.2	7.1	7
	2006	8	4	216	6.3	6.8	7.6	5.6	7.2	9.7	10.4	7.4	10.6	7
	2006	8	5	217	6.8	7.2	8.3	6.3	7.6	9.9	10.6	7.5	9.7	7.6
	2006	8	6	218	7.1	7.2	8.5	6.8	7.1	8.8	10.8	7.9	10.2	7.9
	2006	8	7	219	6.9	7	8.3	6.7	6.8	8.6	10.7	7.3	10.6	7.6
	2006	8	8	220	6.4	6.6	7.8	6.3	6.8	8.2	9	7	11	7.1
	2006	8	9	221	6	6.3	7.4	5.7	7	8.4	7.9	6.5	8.1	6.7
	2006	8	10	222	5.9	6.4	7.2	5.6	7.2	8.7	8.7	7.2	6.5	6.5
	2006	8	11	223	7.1	7.3	8.2	5.8	8	10.4	9.6	7.6	7.5	8.1
	2006	8	12	224	6.3	6.7	7.6	5.8	7.3	9.3	9.5	7.7	6.6	7
	2006	8	13	225	5.7	6	6.9	6.2	6	7.5	9.3	7.5	8.3	6.1
	2006	8	14	226	6	6.1	7.2	5.3	6.2	8.3	8.5	6.9	7.6	6.8
	2006	8	15	227	6.7	6.6	8	6.2	6.9	9.2	8.9	7.3	7.9	7.6
	2006	8	16	228	5.5	5.6	6.5	5.6	5.4	7.1	9.4	7	9	6
	2006	8	17	229	5.6	5.8	6.7	5.2	5.5	7.3	9.7	6.6	10.3	6.3
	2006	8	18	230	5.9	6	7	5.9	5.7	7.6	10	7.1	8.9	6.4
	2006	8	19	231	5.6	6	6.8	6.4	5.7	6.9	9.9	6.4	11.4	5.8
	2006	8	20	232	5.5	5.8	6.5	6.9	5	5.2	10	6.1	10.4	5.6
	2006	8	21	233	5.6	6.1	7.1	6.2	6.1	8.1	9.7	5.7	10	6
	2006	8	22	234	4.6	4.8	5.4	4.6	4.6	6.2	8.1	6.2	9.9	5
	2006	8	23	235	5	5.6	6.1	5.1	5.7	6.9	8.9	6.2	8.4	5.4
	2006	8	24	236	5.2	5.6	6.3	5.3	5.6	6.6	8.7	6.2	9.6	5.7
	2006	8	25	237	4.9	5.3	6	5.6	5.2	6.2	8.5	6.3	10	5.2
	2006	8	26	238	5.7	6	7	6.2	5.8	7.5	9.6	5.7	9.7	6.1
	2006	8	27	239	5.8	6.1	7	6.4	5.8	7.1	9.6	5.5	11.1	6.1
	2006	8	28	240	5	5.3	6.1	5.7	5.3	6	7.9	5.9	8.8	5.3
	2006	8	29	241	5.2	5.5	6.3	5.8	5.6	6.6	8.3	6.5	6.4	5.5
	2006	8	30	242	4.7	5.1	5.7	5.4	5.3	5.8	7.2	5.7	7.8	4.9
	2006	8	31	243	5.2	5.6	6.4	5.8	5.8	6.6	8.2	6.3	8.4	5.4
	2006	9	1	244	5.2	5.8	6.4	5.1	6.6	7.4	7.8	5.7	6.4	5.7
	2006	9	2	245	4.9	5.5	6.2	5	6.4	7.3	7.1	5.6	6.4	5.3
	2006	9	3	246	4.8	5.4	6	4.9	6.2	6.6	7	5.3	7.9	5.3
	2006	9	4	247	5	5.4	6.3	5.4	5.9	6.8	7.3	5.4	8.1	5.4
	2006	9	5	248	5	5.4	6.3	5.4	5.8	6.7	7.5	5.4	9.6	5.4
	2006	9	6	249	4.7	5.1	5.9	5.2	5.3	6.4	7.5	5.3	9.8	5.1
	2006	9	7	250	4.8	5.1	5.9	5.2	5.4	6.1	7.2	5.3	8.3	5.2
	2006	9	8	251	4.4	4.6	5.2	5.3	4.4	4.5	7.3	5.3	11.1	4.5
	2006	9	9	252	4.4	4.7	5.2	5.4	4.5	4.4	7.2	4.9	10.4	4.5
	2006	9	10	253	5	5.4	6	5.9	5.2	5.9	8.4	5.8	8.7	5.2
	2006	9	11	254	4.9	5.3	6	5.9	5.2	5.8	8.2	5.6	12.4	5.1
	2006	9	12	255	4.3	4.6	5.2	5.1	4.9	5	6.5	5.2	8.7	4.4
	2006	9	13	256	4.7	5	5.9	4.6	5.8	7.5	6.2	5	7.1	5.2
	2006	9	14	257	4.5	5.3	5.6	4.1	6.5	7.4	6.6	5	7	5
	2006	9	15	258	4	4.9	5.2	3.6	6.1	6.9	5.9	4.5	7.9	4.5
	2006	9	16	259	3.7	4.8	4.9	3.3	6	7.1	5.9	4.6	6.8	4.2
	2006	9	17	260	4.1	4.9	5.1	3	5.8	7.1	5.7	4.6	7.9	4.8
	2006	9	18	261	4.2	5	5.1	2.9	5.8	7	5.7	4.2	9	4.9
	2006	9	19	262	4.8	5.1	5.5	3.3	5.6	7.2	6.1	5	8.9	5.7
	2006	9	20	263	3.3	4.2	4.4	3	4.3	5.9	6.5	4.8	9	3.7
	2006	9	21	264	3.3	4.2	4.4	3.2	4.8	5.8	5.6	4.4	7.8	3.7
	2006	9	22	265	2.8	3.5	3.7	2.7	3.5	4.5	5.3	4.3	6.7	3
	2006	9	23	266	3.2	3.8	4.2	3.3	4.2	4.9	5.2	3.6	7.1	3.5
	2006	9	24	267	3.4	3.8	4.2	4	4.1	4.4	5.4	4.2	7.9	3.6
	2006	9	25	268	3	3.6	4	3.5	4.1	4.7	5	3.7	7	3.1
	2006	9	26	269	2.6	3	3.2	2.6	2.8	3.8	4.8	4	6.7	2.8
	2006	9	27	270	3.5	3.9	4.5	3.4	4.3	5.6	5.4	4.1	6.4	3.9
	2006	9	28	271	3.8	4.4	4.7	3	4.7	6.2	5.9	4.6	5.9	4.4
	2006	9	29	272	3.1	4.1	4.2	2.7	4.6	6	6.1	4.4	5.2	3.5
	2006	9	30	273	3.6	4.2	4.6	3.2	4.7	6.2	6.1	4.2	6.1	4
	2006	10	1	274	3.2	3.7	4	2.9	3.8	4.7	5.4	3.8	5.8	3.6
	2006	10	2	275	3.2	3.8	4.2	3.2	4.5	5.1	5.2	3.7	4	3.5
	2006	10	3	276	3.3	3.9	4.2	3.1	4.5	5.2	5.2	3.7	4.9	3.6
	2006	10	4	277	3	3.6	3.9	3	4.3	4.7	4.8	3.5	6.2	3.2
	2006	10	5	278	3.1	3.4	3.7	3.4	3.6	4.2	5.4	4.2	3.6	3.2
	2006	10	6	279	2.8	3.1	3.3	3.2	3.1	3.6	5.5	4.1	6.9	3
	2006	10	7	280	3.2	3.5	3.9	3.2	3.8	5	5.5	4.2	6.8	3.5
	2006	10	8	281	3	3.4	3.7	3	3.4	4.8	5.7	4	4.3	3.3
	2006	10	9	282	2.6	3.2	3.4	2.7	3.3	4.3	5.4	3.8	4.1	2.8
	2006	10	10	283	2.5	3	3.2	2.8	3.4	3.7	4.5	3.6	4.4	2.6
	2006	10	11	284	2.1	2.6	2.7	2.4	2.5	3.2	4.7	3.5	3.6	2.2
	2006	10	12	285	2	2.4	2.5	2	1.9	3.1	4.9	3.4	2.9	2.2
	2006	10	13	286	2.5	2.8	3.1	2.7	3.1	3.6	4.5	3.4	3.1	2.6
	2006	10	14	287	1.9	2.2	2.3	2.2	2	2.5	4.6	3	3.8	2
	2006	10	15	288	2.4	2.8	3	2.7	3.1	3.4	4.1	2.3	4.1	2.6
	2006	10	16	289	2.1	2.5	2.7	2.1	2.6	3.2	3.4	2.7	3	2.3
	2006	10	17	290	2	2.9	2.9	1.6	2.9	3.4	3.1	2	1.8	2.3
	2006	10	18	291	2.2	3	3.2	2	3.8	4.5	3.8	3	2.3	2.5
	2006	10	19	292	2.1	3	3.1	2.2	3.7	4.6	4.6	3.1	3.1	2.2
	2006	10	20	293	2.1	2.3	2.5	2.5	2.6	2.5	3.7	2.3	3.9	2.1
	2006	10	21	294	2.2	2.3	2.5	2.1	2.5	3	3.4	2.8	3.1	2.4
	2006	10	22	295	1.9	2.3	2.5	1.8	2.2	3.3	3.6	2.7	3.4	2.1
	2006	10	23	296	1.8	2.6	2.7	1.8	3	3.9	3.8	2.8	3.3	1.9
	2006	10	24	297	1.2	1.8	1.8	1	0.2	1.4	3.8	2.7	3.9	1.3
	2006	10	25	298	1.3	1.9	2	1.2	0.9	2	3.4	1.7	4.1	1.5
	2006	10	26	299	1.3	1.9	2	1.1	0.6	1.7	3.6	2.3	3.4	1.5
	2006	10	27	300	1.4	2.1	2.1	1	0.6	1.5	2.7	1.8	2.8	1.6
	2006	10	28	301	1.3	1.9	1.9	1.1	1	1.7	2.4	1.3	2.4	1.4
	2006	10	29	302	1.4	1.9	1.9	1	0.6	1.3	2.4	1.6	2.2	1.6
	2006	10	30	303	1.2	1.4	1.4	1.6	1.5	1	2.2	1.5	2.2	1.2
	2006	10	31	304	1	1.5	1.5	0.9	0.3	1.2	2.5	1.6	2.6	1.1
	2006	11	1	305	1.1	1.8	1.8	0.9	0	1	2.9	1.4	-999	1.3
	2006	11	2	306	1.2	1.7	1.7	1	0.7	1.5	2.7	1.8	-999	1.3
	2006	11	3	307	1.4	1.8	1.8	1.3	1.8	2.2	2.4	1.7	-999	1.5
	2006	11	4	308	1.6	2.1	2.3	1.5	2.8	3	2.8	1.9	-999	1.8
	2006	11	5	309	1.3	1.5	1.6	1.4	2.1	1.6	1.8	1.6	-999	1.4
	2006	11	6	310	1.2	1.5	1.6	1.2	2	1.6	1.3	1.4	-999	1.3
	2006	11	7	311	1.2	1.5	1.6	1.3	2	1.4	1.5	1.5	-999	1.3
	2006	11	8	312	1.1	1.3	1.4	1.3	1.7	1.2	1.7	1.6	-999	1.2
	2006	11	9	313	1.1	1.3	1.3	1.4	1.6	1	1.9	1.7	-999	1.2
	2006	11	10	314	1.5	1.6	1.7	1.1	1.5	1.8	1.9	1.8	-999	1.7
	2006	11	11	315	1.1	1.2	1.3	0.9	0.4	0.8	1.8	1.7	-999	1.3
	2006	11	12	316	1.4	1.8	2	1	2.4	2.7	1.9	1.7	-999	1.7
	2006	11	13	317	1.3	1.6	1.7	1.2	2.1	2.2	2	1.7	-999	1.4
	2006	11	14	318	1	1.4	1.5	1.2	2	1.6	1.9	1.2	-999	1.1
	2006	11	15	319	1	1.4	1.4	1.1	1.8	1.7	1.8	1.3	-999	1.1
	2006	11	16	320	1	1.4	1.4	1.1	1.9	1.8	1.8	1.6	-999	1.1
	2006	11	17	321	1.1	1.5	1.6	1.1	2.2	2.3	2	1.9	-999	1.2
	2006	11	18	322	1.2	1.6	1.7	1.1	2.1	2.5	2.3	1.7	-999	1.4
	2006	11	19	323	0.9	1.1	1.1	1.1	1.5	1.1	1.7	1.1	-999	1
	2006	11	20	324	0.9	1.2	1.2	1	1.6	1.1	1.7	1.6	-999	1
	2006	11	21	325	0.9	1.2	1.2	0.9	1.6	1	1.5	1.3	-999	1
	2006	11	22	326	1	1.3	1.4	0.8	1.9	1.4	1.4	1.4	-999	1.1
	2006	11	23	327	0.9	1.6	1.6	0.6	2.2	2.3	1.6	1.5	-999	1.1
	2006	11	24	328	1.6	2	2.1	0.6	2.3	3	2	1.7	-999	2
	2006	11	25	329	1.5	1.8	2	0.7	2.2	2.8	2	1.6	-999	1.9
	2006	11	26	330	1	1.7	1.7	0.6	2.2	2.7	2.1	1.7	-999	1.2
	2006	11	27	331	1	1.7	1.7	0.7	2.1	2.8	2.2	1.7	-999	1.2
	2006	11	28	332	1.2	1.4	1.5	0.9	1.7	1.6	2.1	1.7	-999	1.3
	2006	11	29	333	1.2	1.8	1.9	0.6	2.2	2.8	2.3	1.4	-999	1.4
	2006	11	30	334	0.9	1.5	1.6	0.6	2	2.3	1.8	1.5	-999	1
	2006	12	1	335	0.9	1.6	1.6	0.6	1.5	1.7	1.8	1.4	-999	1.1
	2006	12	2	336	1.1	1.6	1.7	0.5	2	2.2	1.5	1.4	-999	1.4
	2006	12	3	337	1.4	1.8	1.9	0.6	1.5	1.9	1.6	1.4	-999	1.8
	2006	12	4	338	0.7	1.1	1.1	0.6	1.4	1	1.2	0.9	-999	0.8
	2006	12	5	339	0.7	0.9	0.9	0.7	1.3	0.7	1.3	1.3	-999	0.8
	2006	12	6	340	0.9	1.1	1.2	0.6	1.5	1.1	1.2	1.2	-999	1
	2006	12	7	341	0.7	0.9	1	0.7	1.3	0.6	1.3	1.3	-999	0.8
	2006	12	8	342	0.9	1.2	1.3	0.6	1.6	1.5	1.5	1.4	-999	1
	2006	12	9	343	1	1.2	1.2	0.7	1.2	1.1	1.5	1.3	-999	1.2
	2006	12	10	344	0.9	1.1	1.2	0.7	1.5	1.1	1.6	1.4	-999	1.1
	2006	12	11	345	0.8	1.1	1.2	0.7	1.6	1.1	1.6	1.4	-999	1
	2006	12	12	346	0.8	1	1.1	0.6	1.4	0.8	1.3	1.2	-999	0.9
	2006	12	13	347	0.9	1.1	1.2	0.6	1.5	1	1.4	1.2	-999	1.1
	2006	12	14	348	0.8	1	1.1	0.7	1.5	1	1.6	1.3	-999	1
	2006	12	15	349	0.7	0.9	1	0.6	1.3	1.1	1.3	1	-999	0.8
	2006	12	16	350	0.9	1.1	1.1	0.6	1.3	0.8	1.3	1.2	-999	1
	2006	12	17	351	1.1	1.6	1.6	0.4	1.9	2.3	1.8	1.6	-999	1.3
	2006	12	18	352	1.3	1.6	1.7	0.5	1.5	2	1.6	1.4	-999	1.7
	2006	12	19	353	1.2	1.7	1.8	0.3	1.7	2	1.4	1.3	-999	1.6
	2006	12	20	354	1.6	1.7	1.9	0.4	1.9	2.1	1.4	1.3	-999	2
	2006	12	21	355	1.4	1.6	1.8	0.3	1.9	2.2	1.2	1.1	-999	1.8
	2006	12	22	356	0.8	1.3	1.4	0.4	1.7	1.7	1.2	1	-999	1
	2006	12	23	357	0.9	1.4	1.4	0.6	0.4	0.7	1.1	1	-999	1.1
	2006	12	24	358	0.7	1.2	1.3	0.4	1.8	1.6	1.2	1.2	-999	0.9
	2006	12	25	359	0.7	1.2	1.2	0.3	1.7	1.5	1	1.1	-999	0.9
	2006	12	26	360	0.8	1.1	1.2	0.3	1.5	1	0.7	0.7	-999	0.9
	2006	12	27	361	0.6	1	1.1	0.3	1.4	0.6	0.4	0.5	-999	0.8
	2006	12	28	362	0.7	1.1	1.1	0.3	1.3	0.6	0.5	0.7	-999	0.9
	2006	12	29	363	0.6	1	1.1	0.3	1.3	0.6	0.5	0.8	-999	0.8
	2006	12	30	364	1	1.3	1.4	0.3	1.5	0.8	0.5	0.8	-999	1.3
	2006	12	31	365	1	1.3	1.4	0.3	1.6	1	0.7	1	-999	1.2
	2007	1	1	1	0.6	0.9	1	0.5	1.5	0.8	0.9	0.7	-999	0.7
	2007	1	2	2	0.7	0.8	0.9	0.6	1.3	0.8	1	1	-999	0.8
	2007	1	3	3	0.5	0.8	0.8	0.5	0.7	0.4	0.7	0.8	-999	0.6
	2007	1	4	4	1.4	1.5	1.6	0.6	0.8	0.8	1	0.8	-999	1.7
	2007	1	5	5	0.6	0.7	0.8	0.5	-0.1	0	0.6	0.4	-999	0.7
	2007	1	7	7	0.5	0.6	0.6	0.5	0.5	-0.1	0.5	0.7	-999	0.5
	2007	1	8	8	0.6	0.9	0.9	0.5	1.3	0.6	0.7	0.9	-999	0.7
	2007	1	9	9	0.6	0.7	0.8	0.6	1.2	0.3	0.7	0.9	-999	0.6
	2007	1	10	10	0.7	1	1	0.6	1.4	0.9	0.9	1.1	-999	0.8
	2007	1	11	11	0.7	1	1	0.6	1.4	0.7	0.8	1	-999	0.8
	2007	1	12	12	0.6	0.7	0.7	0.7	1	0.2	0.9	1.1	-999	0.6
	2007	1	13	13	0.6	0.9	0.9	0.7	1.2	0.7	1.2	0.9	-999	0.7
	2007	1	14	14	0.7	1	1	0.7	1.4	0.9	1.1	1.2	-999	0.8
	2007	1	15	15	0.7	1	1	0.7	1.4	0.9	1.1	1.3	-999	0.8
	2007	1	16	16	0.9	1.2	1.3	0.8	1.6	1.4	1.3	1.2	-999	1.1
	2007	1	17	17	1	1.3	1.4	0.7	1.8	1.4	1.3	1.5	-999	1.2
	2007	1	18	18	0.8	1.2	1.3	0.8	1.7	1.3	1.3	1.4	-999	1
	2007	1	19	19	0.6	0.9	0.9	0.7	0.4	0.5	0.9	1.1	-999	0.7
	2007	1	20	20	0.6	0.8	0.8	0.6	-0.2	0.1	0.9	0.7	-999	0.7
	2007	1	21	21	0.6	0.8	0.8	0.7	0.6	0.2	0.9	0.4	-999	0.7
	2007	1	22	22	0.8	1	1	0.9	1.4	0.7	1.2	1.2	-999	0.9
	2007	1	23	23	0.9	1.1	1.1	1	1.6	0.9	1.5	1.6	-999	0.9
	2007	1	24	24	0.9	1.1	1.1	1.1	1.4	0.9	1.6	1.7	-999	1
	2007	1	25	25	1	1.1	1.2	1.1	1.5	1.1	1.7	1.7	-999	1
	2007	1	26	26	0.9	1.1	1.1	1.1	1.3	0.9	1.6	1.6	-999	0.9
	2007	1	27	27	1	1.2	1.2	1.1	1.5	1.1	1.6	1.6	-999	1
	2007	1	28	28	0.6	0.8	0.8	0.7	0.2	0.3	1.2	0.9	-999	0.7
	2007	1	29	29	1.4	1.6	1.8	0.9	2	1.2	0.9	1	-999	1.7
	2007	1	30	30	0.6	0.8	0.8	0.6	0	0	0.4	0.5	-999	0.6
	2007	1	31	31	0.8	1	1.1	0.9	1.5	0.1	0.5	1	-999	0.9
	2007	2	1	32	0.7	0.9	0.9	0.9	1	0	0.5	1	-999	0.8
	2007	2	2	33	0.8	1	1	0.6	0.3	0.2	0.5	0.7	-999	0.9
	2007	2	3	34	0.5	0.6	0.6	0.6	-0.1	0	0.6	0.5	-999	0.6
	2007	2	4	35	0.7	0.8	0.8	0.8	0.5	0.2	0.9	0.8	-999	0.7
	2007	2	5	36	0.7	0.8	0.8	0.6	-0.1	0.1	1	0.8	-999	0.7
	2007	2	6	37	0.7	0.8	0.8	0.6	-0.1	0.1	1	0.8	-999	0.7
	2007	2	7	38	1.1	1.3	1.4	1.3	1.8	0.9	1.2	1.2	-999	1.2
	2007	2	8	39	1.1	1.2	1.3	1.3	1.6	0.6	1.1	1.5	-999	1.1
	2007	2	9	40	1	1.2	1.3	1.1	1.2	0.6	1.3	1.5	-999	1.1
	2007	2	10	41	1.2	1.5	1.6	1.4	2	1.4	1.5	1.5	-999	1.3
	2007	2	11	42	1.3	1.5	1.6	1.5	2	1.2	1.5	1.7	-999	1.3
	2007	2	12	43	1.4	1.6	1.7	1.1	1.4	1.3	1.5	1.7	-999	1.5
	2007	2	13	44	1.2	1.4	1.5	1	0.7	1	1.4	1.2	-999	1.4
	2007	2	14	45	0.8	1	1.1	0.8	0.2	0.4	1.1	1.3	-999	0.9
	2007	2	15	46	0.8	1	1	0.7	0	0.4	1.3	0.7	-999	0.9
	2007	2	16	47	1.1	1.3	1.4	1.4	1.4	0.8	1.5	1.2	-999	1.2
	2007	2	17	48	1.5	1.7	1.8	1.7	2.2	1.4	1.6	1.9	-999	1.5
	2007	2	18	49	1.2	1.4	1.4	1.5	1.5	0.8	1.6	1.7	-999	1.3
	2007	2	19	50	1.5	1.9	2	1.8	2.5	1.6	1.7	1.8	-999	1.6
	2007	2	20	51	1.6	1.7	1.9	1.9	2.2	1.3	1.7	2.1	-999	1.6
	2007	2	21	52	1.7	2	2.2	1.8	2.3	2	1.9	2	-999	1.9
	2007	2	22	53	1.7	1.9	2	1.7	1.9	1.7	2.2	2.1	-999	1.9
	2007	2	23	54	1.6	1.9	2	1.8	2.1	1.7	2.1	2.1	-999	1.7
	2007	2	24	55	1.5	1.8	1.9	1.6	1.8	1.7	2	1.9	-999	1.6
	2007	2	25	56	1.5	1.9	1.9	1.6	1.9	1.9	2	1.8	-999	1.6
	2007	2	26	57	1.4	1.8	1.9	1.7	2.2	1.6	1.4	1.6	-999	1.5
	2007	2	27	58	1.7	2	2.2	1.8	2.4	1.8	1.6	2.1	-999	1.9
	2007	2	28	59	1.1	1.3	1.3	1.1	0.6	0.8	1.8	1.5	-999	1.1
	2007	3	1	60	1.2	1.5	1.5	1	0.5	0.9	1.6	1.2	-999	1.4
	2007	3	2	61	2.3	2.5	2.8	2.1	3.1	2.7	2	2.4	-999	2.5
	2007	3	3	62	1.1	1.3	1.4	0.9	0.3	0.7	1.6	1.7	-999	1.3
	2007	3	4	63	1.3	1.6	1.7	1.3	1	1.3	2.1	1.8	-999	1.5
	2007	3	5	64	1.4	1.5	1.7	0.8	-0.1	0.6	1.7	1.5	-999	1.7
	2007	3	6	65	3	3.3	3.6	2.1	4.1	3.6	1.8	2.2	-999	3.6
	2007	3	7	66	2.4	2.9	3.2	2.3	4	3.4	2	2.5	-999	2.7
	2007	3	8	67	2.3	2.7	3.1	2.4	3.6	3	2.1	2.4	-999	2.5
	2007	3	9	68	2.3	2.9	3.2	2.6	3.8	3.4	2.4	2.6	-999	2.5
	2007	3	10	69	2.4	3	3.3	2.6	4.1	3.5	2.5	2.8	-999	2.6
	2007	3	11	70	2.1	2.4	2.7	2.3	2.7	2.3	2.4	2.5	-999	2.3
	2007	3	12	71	2.4	2.8	3.1	2.6	3.4	2.8	2.7	3	-999	2.6
	2007	3	13	72	1.6	1.7	1.8	1.1	0.6	1.2	1.9	2.1	-999	1.9
	2007	3	14	73	1.4	1.6	1.7	1.2	0.7	1.1	1.7	2	-999	1.6
	2007	3	15	74	2	2.4	2.7	2	2.6	2.3	1.6	2.2	-999	2.3
	2007	3	16	75	3	3.4	3.8	2.4	4.1	3.4	1.8	2.1	-999	3.4
	2007	3	18	77	2.8	3.2	3.6	2.5	3.9	3.3	1.9	2.7	-999	3.2
	2007	3	19	78	2.5	2.8	3.1	2.3	2.9	2.9	2.3	2.6	-999	2.8
	2007	3	20	79	2.4	2.8	3.2	2.7	3.5	3.1	2.1	2.5	-999	2.6
	2007	3	21	80	2.7	3.1	3.6	3	4	3.6	2.5	3	-999	2.9
	2007	3	22	81	3	3.5	3.9	3.1	4.4	4	2.9	3.3	-999	3.2
	2007	3	23	82	2.4	2.8	3.1	2.4	2.7	2.9	3.1	3	-999	2.7
	2007	3	24	83	3.1	3.3	3.8	2.5	3.2	3.8	3.2	2.9	-999	3.6
	2007	3	25	84	3.2	3.5	4.1	3.1	4.3	4	2.5	2.9	-999	3.6
	2007	3	26	85	2.9	3.3	3.8	3	4.2	3.5	2.5	3	-999	3.1
	2007	3	27	86	3	3.6	3.9	3.1	4.4	3.5	2.7	2.9	-999	3.3
	2007	3	28	87	2.7	3.1	3.5	3.3	3.6	2.4	2.5	3	-999	2.9
	2007	3	29	88	2.9	3.2	3.7	2.8	3.7	3.1	2.3	2.9	-999	3.2
	2007	3	30	89	3.2	3.6	4.2	3.4	4.7	3.7	2.4	3.1	-999	3.5
	2007	3	31	90	2.8	3.3	3.7	3.1	3.8	3.4	2.8	3.3	-999	3
	2007	4	1	91	1.6	1.9	1.9	1.4	1	1.5	2.1	2.4	2.4	1.8
	2007	4	2	92	2.5	2.9	3.2	2.7	3.1	2.7	2.5	3	1.4	2.7
	2007	4	3	93	2.4	2.9	3.1	2.2	2.7	2.3	2	2.1	1	2.7
	2007	4	4	94	2.9	3.4	3.8	3.3	4.5	3.3	2.1	3	-999	3.1
	2007	4	5	95	2.9	3.3	3.7	3	3.8	3.2	2.5	3.3	1.6	3.1
	2007	4	6	96	3.1	3.5	3.9	3.1	3.8	3.5	3.2	3.4	2.9	3.4
	2007	4	7	97	3.1	3.6	4.1	3.3	4.2	4.4	3.2	3	3.1	3.4
	2007	4	8	98	3.3	3.8	4.4	3.6	4.5	4.6	3.4	3.3	1.2	3.6
	2007	4	9	99	2.4	2.7	2.9	2.7	2.6	2.4	3.1	2.8	3.6	2.5
	2007	4	10	100	2.5	2.9	3.2	3	3.1	2.6	2.8	2.6	1.7	2.6
	2007	4	11	101	3.3	3.8	4.3	3.6	4.7	4	3	3.8	2.8	3.5
	2007	4	12	102	3.1	3.5	4	3	3.7	3.6	2.9	3.3	3.4	3.5
	2007	4	13	103	2.9	3.4	3.8	3.2	3.9	3.6	2.7	3.1	0.7	3.1
	2007	4	14	104	3.2	3.9	4.2	3.3	4.6	4.1	3	3.3	3.3	3.5
	2007	4	15	105	3.4	3.7	4.4	3.5	4.5	3.9	2.4	3.2	3.5	3.7
	2007	4	16	106	3.4	3.9	4.4	3.5	4.7	3.5	2.3	3.3	2.2	3.8
	2007	4	17	107	3	3.3	3.7	3.6	3.7	2.7	2.7	3.6	2.8	3.1
	2007	4	18	108	2.3	2.5	2.7	2.2	2	2.3	2.8	2.9	3.9	2.5
	2007	4	19	109	2.6	3.1	3.5	3.4	3.3	2.3	2.6	2.7	2.1	2.8
	2007	4	20	110	1.6	1.8	1.8	1.7	1.2	1.3	2.2	2.6	3.2	1.7
	2007	4	21	111	3.5	3.9	4.5	4.2	4.9	3.3	2.4	3.8	1.7	3.6
	2007	4	22	112	3.6	4.1	4.7	4.4	4.9	3.9	3.4	4.2	4.3	3.8
	2007	4	23	113	3.1	3.6	4.1	3.5	4.1	3.9	3	3	3.5	3.3
	2007	4	24	114	4.7	5.3	5.9	4	6.7	5.8	2.8	3.1	0.6	5.4
	2007	4	25	115	3.8	4.6	4.9	4	6.3	5.2	2.8	4	2.9	4.1
	2007	4	26	116	3.6	4.2	4.6	3.7	5.1	4.7	3.4	4.2	3.4	3.9
	2007	4	27	117	2.2	2.8	2.9	2.2	2	2.9	3.6	2.7	3.5	2.4
	2007	4	28	118	3.7	4.3	4.9	4.3	5.3	5.3	4.1	4.8	3.2	3.9
	2007	4	29	119	3.1	3.5	3.9	2.8	3.1	4.1	4.1	4	3.4	3.5
	2007	4	30	120	4.7	4.9	5.9	4.1	5.6	6.1	3.7	4.5	0.9	5.4
	2007	5	1	121	4.2	4.8	5.7	4.5	6	6	3.8	4.3	1.9	4.6
	2007	5	2	122	4.1	4.6	5.3	4.3	5.4	5.8	4.8	5.2	3.6	4.4
	2007	5	3	123	4	4.8	5.4	4.4	5.7	6.1	4.9	4.4	3.2	4.3
	2007	5	4	124	4.4	4.9	5.7	4.4	5.4	6.5	5.9	5.4	3.5	4.8
	2007	5	5	125	4.7	5.3	6	4.9	6.2	6.8	6.1	5.5	3.5	5
	2007	5	6	126	4.6	5.5	6.4	5.5	6.6	7.5	6.8	5.8	3.8	4.8
	2007	5	7	127	4.5	5.3	5.9	5	6.1	6.8	6.9	6	4.3	4.7
	2007	5	8	128	4.8	5.6	6.3	5.2	6.4	7.6	7.4	6.2	5.7	5.1
	2007	5	9	129	3.1	3.6	3.9	2.9	2.8	4.1	6.5	4.3	5.9	3.5
	2007	5	10	130	3.4	3.9	4.3	3.8	3.9	4.4	5.2	4.3	6.5	3.7
	2007	5	11	131	4	4.3	4.9	4.1	4.3	4.9	5.8	5.1	3.3	4.3
	2007	5	12	132	2.6	2.9	3	3.1	2.4	2.8	5.5	3.3	6	2.7
	2007	5	13	133	3.1	3.6	3.9	3.2	3.2	3.7	4.7	3.2	3.4	3.4
	2007	5	14	134	4.4	4.8	5.6	4.5	5.3	5.7	5.1	4.3	2.7	4.8
	2007	5	15	135	5.4	6.1	6.6	5.9	7.3	6.3	6.5	5.5	1.3	5.7
	2007	5	16	136	5.1	5.7	6.6	5.8	6.8	7	6.3	5.8	5.3	5.4
	2007	5	17	137	4.4	5.1	5.8	5.2	5.5	6.5	6.8	5.3	3.4	4.6
	2007	5	18	138	3.9	4.5	5	4.3	4.7	5.5	6.3	5.3	5.9	4.2
	2007	5	19	139	4.4	5.1	5.8	5.1	5.7	6.4	6.2	4.9	6	4.7
	2007	5	20	140	5	5.8	6.7	5.8	6.9	7.7	6.8	6	5.7	5.2
	2007	5	21	141	5.2	6	6.8	5.7	7	7.8	7.2	5.9	6.1	5.5
	2007	5	22	142	5.3	6.1	7.1	6.1	7.3	8.4	7.3	6.9	5.5	5.6
	2007	5	23	143	3.8	4.4	4.4	2.5	2.4	4.7	8.2	5.6	5.3	4.5
	2007	5	24	144	5.3	6.2	7.2	6	7.3	8.7	7.7	7	6.6	5.7
	2007	5	25	145	4	5	5.1	4.1	4.8	6.4	8.7	7	8.2	4.3
	2007	5	26	146	3.8	4.4	4.6	3.1	3.4	5.1	7.5	5.3	8.7	4.3
	2007	5	27	147	4.5	5	5.4	3.8	4.3	6.4	8.2	6.6	7.6	5.1
	2007	5	28	148	5.1	5.7	6.6	5.2	6.4	7.5	6.8	6.1	5.3	5.6
	2007	5	29	149	5.3	5.9	6.8	5.5	6.8	7.9	6.9	6.3	5.5	5.7
	2007	5	30	150	5.3	6.1	7.1	5.8	7	8.7	8	6.9	6.9	5.7
	2007	5	31	151	5.1	6	6.6	5.3	6.8	8.3	8.1	6.4	6.6	5.5
	2007	6	1	152	4.9	5.6	6.4	5.3	6.2	7.6	7.6	6.6	5.7	5.3
	2007	6	2	153	5	5.6	6.5	5.3	6.2	7.8	7.3	7	7.5	5.3
	2007	6	3	154	5.3	6.2	6.9	5.9	7.5	8.3	7.5	6.6	7.3	5.6
	2007	6	4	155	5.1	5.9	6.5	5.5	6.6	7.4	8.1	6.8	5.4	5.5
	2007	6	5	156	6.2	7.1	7.6	6.6	8.7	9.1	8.6	6.8	6.1	6.6
	2007	6	6	157	6.4	7.2	8	6.4	8.6	10.2	9.1	7.4	6.5	7
	2007	6	7	158	6.7	7.3	8.5	6.4	8.8	10.3	8.3	5.5	7	7.4
	2007	6	8	159	5.5	5.8	6.9	5.4	6.4	7.6	6.6	6.3	7.7	6.1
	2007	6	9	160	5.5	5.9	7	5.6	6.7	8.1	6.6	6.3	6.2	6.1
	2007	6	10	161	6.4	6.7	8	6.2	7.9	9.2	7.4	7.4	5.5	7.1
	2007	6	11	162	6	6.5	7.6	6.2	7.7	8.6	7.2	7.1	6.6	6.6
	2007	6	12	163	6.3	6.4	7.8	5.6	7.1	8.8	7.2	6.7	5.6	7.1
	2007	6	13	164	6.3	6.9	8.1	6.5	8.2	9.3	7.8	6.8	6.4	6.8
	2007	6	14	165	6.1	6.8	7.9	6.9	7.7	8.9	8.7	7.3	8.2	6.4
	2007	6	15	166	6.2	7	7.8	6.8	8.2	9.1	9.2	8	8.2	6.6
	2007	6	16	167	6.4	7.1	7.7	6.2	8.4	9.6	9.4	8.1	8.2	7.1
	2007	6	17	168	6.8	7	7.8	5.9	7.5	9.3	9.7	8.3	7.4	7.7
	2007	6	18	169	6.7	7.1	7.8	5.7	7.6	9.8	9.9	7.6	7.5	7.5
	2007	6	19	170	7.7	7.9	8.9	6	8.6	10.9	9.5	6.4	6	8.9
	2007	6	20	171	7.2	7.7	8.6	6	9	10.8	8.3	6.2	8.1	8.3
	2007	6	21	172	6.7	7.4	7.9	5.7	8.9	10.6	8.1	6.4	8.9	7.6
	2007	6	22	173	6.8	7.5	7.9	5.9	9.3	10.3	7.9	6.8	7.9	7.7
	2007	6	23	174	5.8	6.9	7.3	6.2	8.9	9.9	8.8	7.3	9.1	6.2
	2007	6	24	175	6.7	7.4	7.5	6	9.1	10	9.4	7.8	9.4	7.4
	2007	6	25	176	6.5	7.4	7.9	6	8.9	10.9	9.9	6.5	9.5	7.3
	2007	6	26	177	7.5	7.9	8.3	6	9.5	10.9	8.8	7	10.8	8.5
	2007	6	27	178	7.5	7.9	8.5	6.3	9.4	11.1	9.7	7.9	11.2	8.5
	2007	6	28	179	6.6	7.5	7.7	6	9.1	10.9	10.2	7.6	11.9	7.3
	2007	6	29	180	7.4	7.9	8.4	6.1	9	11.1	10.7	7.4	8.9	8.4
	2007	6	30	181	6.4	7.1	7.7	6.1	7.9	9.4	10.2	7	10.6	7
	2007	7	1	182	6.8	7.3	8	6.1	8.2	9.5	9.3	6.9	12	7.6
	2007	7	2	183	6.9	7.3	8.1	5.9	8	9.8	9.3	7.3	10.4	7.9
	2007	7	3	184	6.9	7.1	7.9	5.5	7.6	9.6	8.9	7.7	9.4	8
	2007	7	4	185	7.5	7.9	8.9	6.4	9.1	11.6	10	7.2	9.6	8.5
	2007	7	5	186	6.5	7.2	8.3	6.5	8.3	11	9.8	7.6	10.6	7.1
	2007	7	6	187	6.7	7.4	8.2	6.5	8.5	10.5	10.4	8.4	8.9	7.3
	2007	7	7	188	7.3	7.2	8.4	5.9	7.5	10.4	10.1	8.6	8.8	8.3
	2007	7	8	189	8.6	8.8	9.1	6.1	10.2	11.8	9.5	7	9	10.1
	2007	7	9	190	7.1	7.9	8.1	5.8	9.8	11.6	10.1	7.5	10	8.1
	2007	7	10	191	6.4	7.5	7.7	6.3	9.3	10.8	10.4	7.8	10.2	7
	2007	7	11	192	8	8.3	9.3	6.7	9.6	12.1	10.8	8.1	10	9.2
	2007	7	12	193	8.1	8.4	9.1	6.5	9.6	12	10.6	7.7	10.2	9.3
	2007	7	13	194	7	7.6	8.4	6.2	8.9	11.3	10.1	8	10.7	7.9
	2007	7	14	195	6.7	6.7	8.1	5.8	7.1	9.8	9	7.8	12.1	7.6
	2007	7	15	196	7.8	7.8	9	5.7	7.9	11	9.9	6.8	10.9	9.2
	2007	7	17	198	7.1	7.5	7.7	5.7	8.7	8.7	7.4	5.7	7.3	8.1
	2007	7	19	200	6.3	7.1	7.2	5.6	8.5	9.2	9.4	6.9	8.5	7
	2007	7	20	201	5.6	6.8	7	5.6	8.2	9.6	9.8	6.6	8.7	6.1
	2007	7	21	202	5.5	6.5	6.6	5.1	7.2	9	10.1	7.3	9.3	6
	2007	7	22	203	6.3	7.1	7.7	6	8	10.1	10.2	7.7	9.8	7
	2007	7	23	204	7	7.7	8.1	5.9	8.7	11.1	11.3	7.2	9.4	7.9
	2007	7	24	205	5.7	7	7.1	5.6	8.1	10.3	11.6	7.1	8.2	6.2
	2007	7	25	206	5.9	7	7.5	5.7	8	10.7	11.3	7.1	7.2	6.5
	2007	7	26	207	5.5	6.5	6.7	5	7.2	9.6	10.5	7.7	8.7	6.1
	2007	7	27	208	5.7	6.8	7.2	5.6	7.9	10.2	10.9	7.5	8.9	6.2
	2007	7	29	210	6.4	7.3	7.5	5.4	8.8	11.1	10.6	7.3	10.4	7.3
	2007	7	30	211	5.8	7	7.4	5.9	8.4	10.7	10.7	7.5	10.3	6.3
	2007	8	1	213	4.8	6.2	6.3	5	6.6	9.2	11.8	7.3	9.7	5.2
	2007	8	2	214	5.7	6.4	7.2	5.4	6.3	9.4	11.2	6.8	11.8	6.3
	2007	8	3	215	7.1	7.4	8.4	5.9	8	10.9	10.1	7.2	11.5	8.1
	2007	8	4	216	6.8	7.2	8.2	5.9	8.2	10.4	9	6.9	11.3	7.7
	2007	8	5	217	6.1	6.7	7.7	5.7	7.7	10.1	8.9	7.2	10.3	6.8
	2007	8	6	218	6	6.5	7.6	5.7	7.3	9.7	8.9	7.1	10.5	6.7
	2007	8	7	219	6.4	6.5	7.9	5.7	7.1	9.2	8.3	6.7	9	7.2
	2007	8	8	220	5.5	6	7.1	5.6	6.9	8.7	7.8	7.4	8	6.1
	2007	8	9	221	5.9	6.4	7.4	5.6	7.2	9.3	8.4	7.4	7.6	6.6
	2007	8	10	222	5.7	6.4	7.1	5.5	7.3	9.3	9	7.6	8.8	6.3
	2007	8	11	223	6	6.7	7.4	5.9	7.4	9.3	10.3	7.5	9.6	6.5
	2007	8	12	224	5.6	6.4	7.2	5.9	7.1	9.1	10.2	7.5	9.2	6
	2007	8	13	225	5.5	6.1	7.1	5.8	6.7	8.9	8.3	6.6	9.8	6
	2007	8	14	226	5.4	6	7	5.4	6.8	8.7	7.9	6.7	9.2	5.9
	2007	8	15	227	5.1	5.8	6.7	5.5	6.5	8.7	8	6.2	8.9	5.4
	2007	8	16	228	5	5.7	6.6	5.3	6	8.6	8.8	6.1	8.6	5.4
	2007	8	17	229	5.8	6.2	7.3	5.2	6.4	9.1	9.1	6	8.1	6.5
	2007	8	18	230	6	6.3	7.6	5.6	6.9	9.4	8.2	5.8	10.5	6.6
	2007	8	19	231	5.8	6.2	7.4	5.8	6.7	9.1	8.5	6	10	6.3
	2007	8	20	232	4.7	5.3	6.1	5.1	5.6	7.7	8.3	6.4	8.5	5.1
	2007	8	21	233	5.1	5.7	6.6	5.6	6.2	8.3	8.5	6.5	8.5	5.4
	2007	8	22	234	4.9	5.6	6.4	5.3	5.9	8.4	9	6.5	10.3	5.3
	2007	8	23	235	5.8	6.3	7.1	5.5	6.9	8.5	8.7	5.9	9.9	6.4
	2007	8	24	236	5.2	5.7	6.5	5.1	6	7.5	8.3	5.5	9.1	5.6
	2007	8	25	237	4.9	5.6	6.5	5.3	6.2	8.4	8.2	5.9	9.8	5.2
	2007	8	26	238	4.8	5.4	6.3	5.2	5.9	8.1	8.2	6	9.8	5.1
	2007	8	27	239	4.6	5.2	6	5	5.9	7.7	7.3	5.4	9.4	4.9
	2007	8	28	240	4.5	5.2	6	5	5.9	7.9	7.4	5.6	13.5	4.8
	2007	8	29	241	4.6	5.3	6.1	5.1	5.9	8	7.9	6	9.8	4.9
	2007	8	30	242	4.9	5.5	6.3	5.5	5.8	7.8	8.7	5.7	10.1	5.2
	2007	8	31	243	4.8	5.5	6.3	5.4	5.8	7.8	8.9	5.9	9.6	5.1
	2007	9	1	244	5.1	6	6.6	5.2	6.9	9	9.2	6.5	10.1	5.5
	2007	9	2	245	4.9	5.9	6.5	5.3	6.5	8.7	9.5	6	10.1	5.2
	2007	9	3	246	5.1	5.9	6.6	5	6.6	8.9	9.1	6.4	9.8	5.6
	2007	9	4	247	4.8	5.5	6.3	5.2	5.9	7.9	8.7	5.5	10.1	5.1
	2007	9	5	248	5.1	5.8	6.8	5.2	6.3	9.1	8.9	5.9	10.6	5.6
	2007	9	6	249	4.7	5.3	6.2	5	5.8	8.1	7.8	5.8	11.5	5.2
	2007	9	7	250	5.4	5.7	6.7	5	6.1	8.8	8.2	6.1	10.8	6
	2007	9	8	251	5.3	5.6	6.7	4.9	6.1	8.6	7.2	4.9	9.3	6
	2007	9	9	252	4.9	5.1	6.1	4.5	5.8	7.7	6	5	9.4	5.6
	2007	9	10	253	4.5	5	5.8	4.6	5.8	7.9	6.6	5.7	7.9	4.9
	2007	9	11	254	4.2	4.9	5.7	4.5	5.8	7.7	6.3	5	8.4	4.6
	2007	9	12	255	4.1	4.9	5.6	4.6	5.6	7.5	7.1	5	8.6	4.3
	2007	9	13	256	4.1	4.8	5.6	4.5	5.7	7.5	6.6	4.8	8.1	4.4
	2007	9	14	257	4.5	5.2	5.6	3.7	6.3	7.6	6.2	5.3	6.8	5.2
	2007	9	15	258	3.8	4.9	5	4	6.3	6.8	6.7	5.3	7.8	4
	2007	9	16	259	4	5.1	5.1	3.9	6.5	7.2	6.8	5.1	7.8	4.4
	2007	9	19	262	3.8	4.6	4.7	4.2	5.7	5.2	6.3	5.1	8.8	4
	2007	9	20	263	3.7	4.6	4.8	3.8	5.7	6.3	6.1	5	8.7	3.9
	2007	9	21	264	3.8	4.6	4.8	4.2	5.6	5.9	6.6	4.9	8.8	3.9
	2007	9	22	265	3.7	4.6	4.9	3.9	5.4	6.6	6.9	5.3	8.6	4
	2007	9	23	266	3.9	4.5	5.1	4	5.1	6.4	6.6	4.7	9.4	4.2
	2007	9	24	267	4.1	4.4	5.1	3.8	4.8	6.5	5.9	4.2	8.9	4.6
	2007	9	26	269	3.1	3.9	4.3	3.6	4.7	5.7	5.2	4.3	9.2	3.3
	2007	9	27	270	3.4	4.3	4.8	3.9	5.1	6.7	6.2	4.7	9.5	3.6
	2007	9	28	271	3.3	4.3	4.5	3.6	5.2	6.1	6.4	4.6	9.3	3.5
	2007	9	29	272	3.4	4.5	4.6	3.2	5.7	7	6.5	4.9	7.9	3.7
	2007	9	30	273	3.2	4.1	4.5	3.3	5.1	6.3	5.8	4.1	8.4	3.5
	2007	10	1	274	3.2	4	4.4	3.1	4.7	6	5.6	4.4	9.3	3.5
	2007	10	2	275	3	3.8	4	3.2	4.3	5.2	5.9	4.1	9.4	3.1
	2007	10	3	276	2.9	3.6	3.8	3.2	3.9	4.6	6.1	4.2	9.1	3.1
	2007	10	4	277	2.9	3.7	3.9	3	3.9	5.2	6.2	3.9	9.5	3.1
	2007	10	5	278	2.5	3	3.3	2.4	3.1	4.5	4.4	3.2	8.8	2.8
	2007	10	6	279	2.3	2.8	3	2.2	2.7	3.9	4.1	2.9	9.7	2.5
	2007	10	7	280	2.7	3.3	3.7	2.9	4.1	5.2	4.4	3.7	7.9	2.9
	2007	10	8	281	2.5	3.4	3.7	2.9	4	5.5	5	3.6	8.4	2.7
	2007	10	9	282	2.5	3.4	3.7	2.7	3.9	5.5	5.1	3.6	8.1	2.7
	2007	10	10	283	3.1	3.6	4	2.5	3.6	5.6	5.3	3.3	8.4	3.5
	2007	10	11	284	2.5	3.1	3.3	2.3	2.9	4.7	5.1	3.2	8.3	2.8
	2007	10	12	285	2.6	3.3	3.6	2.7	3.6	5.4	5.2	3.6	8.7	2.8
	2007	10	13	286	2.3	2.9	3.1	2.2	2.9	4.4	4.6	3.2	8.4	2.5
	2007	10	14	287	2.5	3.1	3.4	2.5	3.3	5	4.8	2.9	9.9	2.8
	2007	10	15	288	2.8	3.1	3.4	2.3	3.3	4.8	4.1	3.2	9.1	3.2
	2007	10	16	289	2.8	3	3.4	2.2	3.4	4.5	3.5	2.5	5.8	3.2
	2007	10	17	290	2.9	3.4	3.6	1.8	4.3	4.8	3.2	2.9	5.1	3.5
	2007	10	18	291	2.2	3	3.1	2.1	4	4.4	3.5	2.9	7.5	2.5
	2007	10	19	292	2.3	2.8	2.9	2	3.1	3.3	3.6	3	8.4	2.5
	2007	10	20	293	2	2.2	2.4	1.5	1.7	2.8	3.4	2.8	9.4	2.3
	2007	10	21	294	1.8	2.5	2.7	2	2.8	3.9	4	2.7	8.7	2
	2007	10	23	296	1.9	2.8	2.9	1.9	3.1	4.5	4.6	3.3	6.7	2
	2007	10	24	297	2	2.8	2.9	1.9	3	4.3	4.5	3	8.1	2.2
	2007	10	25	298	1.8	2.7	2.8	1.9	2.8	4.2	4.7	3.3	6.3	2
	2007	10	26	299	2.3	3	3.3	2	3.6	5.1	4.4	3.3	7.6	2.6
	2007	10	27	300	2.6	3.2	3.5	1.9	3.8	5	4.3	2.8	7.9	3.1
	2007	10	28	301	1.8	2.7	2.8	1.7	3.5	4.4	3.7	2.6	7.7	2
	2007	10	29	302	1.7	2.6	2.7	1.6	3.2	4	3.5	2.6	7.6	1.9
	2007	10	30	303	1.2	1.7	1.7	1.1	0.7	1.7	2.8	1.8	8.5	1.3
	2007	10	31	304	1.7	2.2	2.4	1.6	2.7	3.5	2.7	2.4	7.3	1.9
	2007	11	1	305	2.1	2.6	2.9	1.5	3.1	4	3.2	2.4	-999	2.5
	2007	11	2	306	2	2.5	2.7	1.6	2.7	4	3.5	2.7	-999	2.3
	2007	11	3	307	2.5	2.7	3	1.7	3	4.6	3.5	2.3	-999	2.9
	2007	11	4	308	1.9	2.4	2.6	1.4	3.1	3.9	2.9	2.4	-999	2.2
	2007	11	5	309	1.1	1.6	1.6	1.1	1	1.8	2.9	2	-999	1.2
	2007	11	6	310	1.2	1.7	1.7	1.3	1.4	2.2	3.1	2	-999	1.3
	2007	11	7	311	1.6	1.9	2	1.4	1.8	2.4	3.1	1.8	-999	1.8
	2007	11	8	312	1.4	1.7	1.7	1.2	1.4	2	2.8	1.8	-999	1.6
	2007	11	9	313	1.3	1.3	1.4	1	0.7	1.1	2.2	1.5	-999	1.5
	2007	11	10	314	0.9	1.1	1.1	1	0.8	0.8	2	1.6	-999	1
	2007	11	11	315	1.3	1.3	1.4	0.9	0.5	1	2.3	1.8	-999	1.5
	2007	11	12	316	1.5	1.8	2	1.1	2.5	2.5	1.9	1.7	-999	1.7
	2007	11	13	317	1.1	1.5	1.6	1.1	2	2.1	1.9	1.7	-999	1.1
	2007	11	14	318	0.9	1.3	1.3	0.9	0.7	1.1	1.9	1.6	-999	1
	2007	11	15	319	1.2	1.5	1.6	1.2	1.8	2.2	2.4	1.8	-999	1.3
	2007	11	16	320	1	1.4	1.4	1.1	1.5	1.9	2.5	1.8	-999	1
	2007	11	17	321	1.2	1.5	1.5	1.3	1.8	2.1	2.7	2	-999	1.2
	2007	11	18	322	1	1.6	1.6	1.1	1.9	2.5	2.7	2	-999	1.1
	2007	11	19	323	0.8	1.3	1.3	0.8	0.4	1.2	2.2	1.2	-999	0.9
	2007	11	20	324	1	1.4	1.5	0.8	0.3	0.9	1.8	1.2	-999	1.2
	2007	11	21	325	0.9	1.2	1.3	0.7	0.1	0.4	1.4	0.9	-999	1
	2007	11	22	326	1	1.4	1.4	0.8	0.8	1.1	1.6	0.9	-999	1.1
	2007	11	23	327	1	1.5	1.5	0.8	2	1.6	1.7	1.3	-999	1.1
	2007	11	24	328	0.8	1.3	1.3	0.8	1.9	1.2	1.5	1.5	-999	0.9
	2007	11	25	329	0.8	1.2	1.2	0.8	1.8	1.1	1.4	1.5	-999	0.9
	2007	11	27	331	0.8	1.2	1.2	0.8	1.7	1.2	1.5	1.5	-999	0.9
	2007	11	28	332	0.8	1.2	1.2	0.7	0.1	0.4	1.2	0.8	-999	0.9
	2007	11	29	333	1.1	1.6	1.7	0.6	1.9	2	1.4	1.2	-999	1.3
	2007	11	30	334	0.8	1.3	1.3	0.6	1.8	1.6	1.2	1.2	-999	0.9
	2007	12	1	335	1.4	1.8	1.9	0.6	1.7	1.9	1.8	1.3	-999	1.7
	2007	12	2	336	1.2	1.6	1.7	0.6	2.1	2.1	1.8	1.3	-999	1.5
	2007	12	3	337	1.2	1.6	1.7	0.5	2	2.1	1.5	1.3	-999	1.5
	2007	12	4	338	1	1.4	1.4	0.6	0.3	0.6	1.1	0.7	-999	1.2
	2007	12	5	339	1.3	1.5	1.7	0.7	0	0.4	1.1	0.6	-999	1.7
	2007	12	6	340	1	1.1	1.2	0.6	-0.1	0.2	1.4	0.9	-999	1.2
	2007	12	7	341	1	1.4	1.4	0.6	0.3	0.6	1.2	0.8	-999	1.2
	2007	12	8	342	0.6	1.2	1.2	0.5	1.4	1.5	1.2	1	-999	0.7
	2007	12	9	343	0.6	1.1	1.1	0.6	1.2	1.3	1.4	1.1	-999	0.7
	2007	12	10	344	0.6	0.9	0.9	0.6	-0.1	0.2	1.4	0.7	-999	0.7
	2007	12	11	345	0.8	1.3	1.3	0.7	0.1	0.5	1.4	0.7	-999	0.8
	2007	12	12	346	0.9	1.3	1.3	0.7	-0.1	0.5	1.6	0.9	-999	1
	2007	12	13	347	1	1.3	1.4	0.7	0.5	0.9	1.8	1.1	-999	1.1
	2007	12	14	348	1.2	1.4	1.6	0.6	0.4	0.8	1.3	0.8	-999	1.4
	2007	12	15	349	0.7	1	1	0.6	1	1.2	1.6	1	-999	0.7
	2007	12	16	350	0.7	1.2	1.2	0.6	0.3	0.6	1.3	0.8	-999	0.8
	2007	12	17	351	1.1	1.4	1.5	0.4	1.7	1.6	1.4	1	-999	1.3
	2007	12	18	352	1.1	1.3	1.5	0.4	1.6	1.4	1.1	1	-999	1.4
	2007	12	19	353	1.2	1.5	1.5	0.3	1.6	0.9	0.6	0.8	-999	1.6
	2007	12	20	354	0.6	1.1	1.1	0.3	1.5	0.9	0.7	0.9	-999	0.8
	2007	12	21	355	0.6	1.1	1.1	0.3	1.7	1.1	0.7	1	-999	0.7
	2007	12	22	356	0.7	1.2	1.2	0.3	1.6	1.2	0.8	1.1	-999	0.9
	2007	12	23	357	0.5	1.1	1.1	0.4	1.6	1.3	1	1.1	-999	0.6
	2007	12	24	358	0.5	1.1	1.1	0.4	1.8	1.4	1.1	1.2	-999	0.6
	2007	12	25	359	0.5	1.1	1.1	0.4	1.8	1.3	1.2	1.2	-999	0.5
	2007	12	26	360	0.6	1.1	1.1	0.4	1.6	1.2	1.1	1.2	-999	0.7
	2007	12	27	361	0.6	1.1	1.1	0.4	1.7	1.2	1.1	1.2	-999	0.7
	2007	12	28	362	0.6	1	1.1	0.4	1.7	1.1	1	1.1	-999	0.6
	2007	12	29	363	0.8	1.1	1.2	0.4	1.5	1	1	1.1	-999	0.9
	2007	12	30	364	0.6	1.1	1.1	0.4	1.6	0.9	0.9	1	-999	0.7
	2007	12	31	365	0.6	1	1	0.4	1.5	0.8	0.9	0.7	-999	0.8
	2008	1	1	1	0.7	0.9	1	0.5	0.9	0.5	0.8	1	-999	0.8
	2008	1	2	2	0.7	0.9	0.9	0.6	1	0.7	1	1	-999	0.9
	2008	1	3	3	1.1	1.1	1.2	0.6	0.9	0.9	1	1.1	-999	1.4
	2008	1	4	4	1.1	1.3	1.4	0.6	-0.1	0.2	1	0.6	-999	1.3
	2008	1	5	5	0.7	0.8	0.8	0.6	0.9	0.4	0.7	0.8	-999	0.8
	2008	1	7	7	0.5	0.7	0.7	0.6	1.2	0.2	0.8	1	-999	0.6
	2008	1	8	8	0.8	0.9	1	0.5	0.5	0.2	0.5	0.5	-999	0.9
	2008	1	9	9	0.7	0.8	0.8	0.6	0.9	0.2	0.6	0.9	-999	0.8
	2008	1	10	10	1	1.1	1.3	0.5	1.4	0.8	0.5	0.9	-999	1.3
	2008	1	11	11	0.8	1	1.1	0.6	1.3	0.6	0.6	0.9	-999	0.9
	2008	1	12	12	0.6	0.7	0.7	0.6	1.1	0	0.6	0.9	-999	0.6
	2008	1	13	13	0.6	0.8	0.8	0.6	1.3	0.3	0.6	0.9	-999	0.7
	2008	1	14	14	0.6	0.8	0.9	0.7	1.4	0.5	0.7	1	-999	0.7
	2008	1	15	15	0.6	0.9	0.9	0.7	1.5	0.8	0.8	1.2	-999	0.7
	2008	1	16	16	0.6	0.8	0.8	0.6	0.4	0.3	0.6	0.8	-999	0.6
	2008	1	17	17	0.8	1.1	1.2	0.6	1.6	0.9	0.9	1.2	-999	0.9
	2008	1	18	18	0.8	1.1	1.2	0.7	1.6	1	0.9	1.3	-999	0.9
	2008	1	19	19	0.8	1.1	1.2	0.8	1.7	1.3	1.2	1.4	-999	0.9
	2008	1	20	20	0.8	1	1	0.9	1.5	0.8	1.2	1.4	-999	0.8
	2008	1	21	21	0.8	0.9	0.9	1	1.3	0.5	1.2	1.4	-999	0.8
	2008	1	22	22	0.8	0.9	1	0.9	1.2	0.6	1.1	1.3	-999	0.9
	2008	1	23	23	0.9	1.1	1.1	1	1.5	0.9	1.4	1.3	-999	1
	2008	1	24	24	0.9	1	1	1	1.4	0.5	1.1	1.5	-999	0.9
	2008	1	25	25	0.8	0.9	0.9	0.9	0.9	0.5	1.2	1.4	-999	0.8
	2008	1	26	26	0.8	1	1	0.9	1	0.6	1.2	1.3	-999	0.8
	2008	1	27	27	1	1.1	1.2	1.1	1.7	0.9	1.1	1.4	-999	1.1
	2008	1	28	28	0.6	0.7	0.7	0.6	0	0	0.6	0.7	-999	0.6
	2008	1	29	29	0.9	1.2	1.2	0.6	-0.2	0.1	1	0.7	-999	1.1
	2008	1	30	30	0.8	1	1	0.7	0.5	0.3	0.7	0.8	-999	0.9
	2008	1	31	31	1	1.2	1.3	1	1.6	0.4	0.8	0.7	-999	1.1
	2008	2	1	32	0.9	1	1.1	1	1.5	0.3	0.7	1.3	-999	0.9
	2008	2	2	33	1	1.2	1.3	1	1.7	1	0.9	1.3	-999	1.1
	2008	2	3	34	1	1.1	1.2	1.2	1.6	0.5	1	1.5	-999	1.1
	2008	2	4	35	1.1	1.2	1.3	1.3	1.7	0.7	1.2	1.6	-999	1.1
	2008	2	5	36	1.1	1.2	1.3	1.3	1.7	0.8	1.1	1.1	-999	1.1
	2008	2	6	37	1.1	1.2	1.3	1.3	1.7	0.7	1.1	1.6	-999	1.2
	2008	2	7	38	1.2	1.3	1.4	1.3	1.8	0.9	1.2	1.6	-999	1.3
	2008	2	8	39	0.7	0.8	0.8	0.8	0.2	0.2	1.1	1.1	-999	0.7
	2008	2	9	40	1.2	1.4	1.5	1.4	1.8	0.9	1.5	1.6	-999	1.3
	2008	2	10	41	1.5	1.7	1.9	1.5	2.1	1.7	1.7	1.9	-999	1.7
	2008	2	11	42	1.3	1.4	1.4	1.2	1.1	1.1	1.8	1.7	-999	1.4
	2008	2	12	43	1.2	1.6	1.7	1.2	1.6	1.3	1.4	1.2	-999	1.4
	2008	2	13	44	1.3	1.5	1.6	1.2	1.6	1.4	1.3	1.2	-999	1.4
	2008	2	14	45	1.1	1.3	1.3	1	0.9	0.8	1.3	1.3	-999	1.2
	2008	2	15	46	1.3	1.5	1.7	1.5	2.1	0.9	0.9	1.3	-999	1.4
	2008	2	16	47	0.9	1	1	0.9	0.6	0.3	0.8	1.3	-999	0.9
	2008	2	17	48	0.7	0.8	0.9	0.7	-0.1	0.2	1.1	1.1	-999	0.8
	2008	2	18	49	0.8	0.9	0.9	0.9	0.3	0.3	1.3	1.3	-999	0.8
	2008	2	19	50	1.1	1.3	1.4	1.2	1.4	0.7	0.9	1.5	-999	1.2
	2008	2	20	51	1.3	1.4	1.5	1.6	1.9	0.5	0.8	1.5	-999	1.3
	2008	2	21	52	1.5	1.7	1.9	1.6	2.4	1.3	1	1.8	-999	1.7
	2008	2	22	53	1.9	2	2.3	1.8	2.6	1.7	1.3	2	-999	2.1
	2008	2	23	54	1.8	2	2.2	1.9	2.6	1.8	1.6	2.1	-999	1.9
	2008	2	24	55	1.5	1.6	1.7	1.3	1.1	1.2	1.6	1.6	-999	1.7
	2008	2	25	56	1.5	1.8	1.9	1.4	1.5	1.6	1.6	1.4	-999	1.7
	2008	2	26	57	2.3	2.3	2.5	1.5	1.9	2	1.5	1.9	-999	2.7
	2008	2	27	58	2.1	2.3	2.6	2.1	3	2.4	1.8	2.3	-999	2.3
	2008	2	28	59	1.8	2	2.1	2	2.4	1.6	1.9	2.4	-999	1.9
	2008	2	29	60	2	2.3	2.6	2.1	2.9	2.7	2.2	2.3	-999	2.1
	2008	3	1	60	2	2.4	2.7	2.2	3.1	2.7	2.3	2.5	-999	2.2
	2008	3	2	61	1.9	2.2	2.3	2	2.5	2.1	2.2	2.4	-999	2
	2008	3	3	62	1.4	1.7	1.8	1.5	1.4	1.4	1.8	1.8	-999	1.5
	2008	3	4	63	2.2	2.6	2.9	2.4	3.6	3.1	2	2.7	-999	2.3
	2008	3	5	64	2.2	2.9	3	2.1	3.9	3.4	2.3	2.7	-999	2.4
	2008	3	6	65	2.4	3	3.3	2.3	3.9	3.8	2.7	3	-999	2.7
	2008	3	7	66	2.4	2.9	3.3	2.6	3.7	3.7	3.1	3.2	-999	2.6
	2008	3	8	67	3	3.1	3.6	2.4	3.4	3.9	3.3	3.3	-999	3.5
	2008	3	9	68	2.3	2.8	2.9	2	2.5	3.1	3.8	3.4	-999	2.6
	2008	3	10	69	1.6	1.8	1.9	1.4	0.8	1.6	3.6	2.5	-999	1.8
	2008	3	11	70	2.8	3.1	3.5	2.9	3.8	3.3	3.1	3	-999	3
	2008	3	12	71	2.3	2.6	2.9	2.5	3.1	2.9	2.4	2.8	-999	2.5
	2008	3	13	72	2	2.4	2.5	1.9	2.1	2.5	2.6	2.3	-999	2.3
	2008	3	14	73	1.4	1.8	1.9	1.3	1.1	1.5	1.8	1.6	-999	1.6
	2008	3	15	74	2.5	3	3.3	2.5	4	3.2	2	2.5	-999	2.7
	2008	3	17	76	2.5	3	3.3	2.6	3.9	3.3	2.2	2.9	-999	2.7
	2008	3	18	77	2.6	2.9	3.2	2.5	3.1	3.2	2.6	3.1	-999	2.9
	2008	3	19	78	3.3	3.5	4	3.1	4.1	4.4	3.2	3.5	-999	3.7
	2008	3	20	79	2.8	3.1	3.5	2.8	3.6	3.6	2.8	3.2	-999	3.1
	2008	3	21	80	2.5	2.7	2.9	1.8	1.8	2.4	2.8	2.4	-999	3
	2008	3	22	81	2.9	3.2	3.5	2.6	3.3	3.3	3.2	3.7	-999	3.3
	2008	3	23	82	4.1	3.8	4.4	2.8	3.6	4.7	4.1	4.3	-999	4.8
	2008	3	24	83	4	4.1	4.7	3.5	4.4	5.3	4.6	4.5	-999	4.6
	2008	3	25	84	3.8	4.1	4.7	3.5	4.8	5	4.3	3.9	-999	4.2
	2008	3	26	85	3.3	3.9	4.2	3.5	5.1	4.1	3.2	3.4	-999	3.6
	2008	3	27	86	3.1	3.4	3.9	3.8	4.1	2.9	3	3.7	-999	3.3
	2008	3	28	87	3	3.4	3.8	3	3.9	3.5	3	3.6	-999	3.3
	2008	3	29	88	2.8	3.2	3.5	2.7	3.2	3.4	3.6	3.9	-999	3.1
	2008	3	30	89	2.2	2.4	2.5	1.6	1.1	2.1	3.5	2.9	-999	2.6
	2008	3	31	90	3.5	3.6	4.2	3	3.8	4.1	2.9	3.2	-999	4
	2008	4	1	91	2.7	3.1	3.5	2.9	3.5	3	2.4	2.4	3.1	2.9
	2008	4	2	92	3.6	4	4.5	3.5	5.1	3.9	2.5	3.4	2.2	4
	2008	4	3	93	3.3	3.7	4.2	3.2	4.5	3.8	2.7	3.3	2.5	3.6
	2008	4	4	94	3.3	3.8	4.4	3.6	4.7	4.2	3.3	3.4	4.2	3.6
	2008	4	5	95	3.2	3.6	4	3.3	4.3	3.7	3.1	3.4	2.3	3.4
	2008	4	6	96	3.6	3.8	4.3	3.1	3.8	4.6	3.6	3.5	2.3	4.1
	2008	4	7	97	3	3.4	3.8	3	3.5	4.1	3.7	3.1	5.3	3.3
	2008	4	8	98	1.5	1.6	1.7	1.4	0.7	1.4	3.4	3.8	2.7	1.6
	2008	4	9	99	3.6	4	4.6	4.3	4.9	3.8	3.3	3.8	3.5	3.7
	2008	4	10	100	2.7	3.2	3.4	2.8	3.3	3.3	3.2	3.4	4.1	2.9
	2008	4	11	101	3.6	4	4.5	3.6	4.4	4.5	4	4.2	4.3	4
	2008	4	12	102	3.6	4.1	4.6	3.8	4.5	5	4.5	4.5	3.8	3.9
	2008	4	13	103	4.5	4.9	5.4	4	5.5	6.1	5.5	5.5	4.2	5.1
	2008	4	14	104	4.3	4.8	5.5	4.6	5.3	6.3	6.4	5.3	7	4.6
	2008	4	15	105	4.1	4.7	5.1	4.4	5.2	5.4	6.4	5.3	9.1	4.4
	2008	4	16	106	4.2	4.4	5.1	4.6	4.6	4.7	5.6	4.8	7.8	4.5
	2008	4	17	107	3.9	4.3	5	4.5	5.1	4.6	3.8	4.2	6.3	4.2
	2008	4	18	108	3.6	3.9	4.4	4.4	4.2	3.3	4.2	4.6	8.9	3.7
	2008	4	19	109	3.4	3.7	4.1	4	3.9	3.6	4.3	4.9	6.9	3.6
	2008	4	20	110	4.2	4.6	5.3	4.9	5.4	4.9	4.8	5.3	7.3	4.5
	2008	4	21	111	4.6	5	5.7	5.1	5.6	5.5	5.7	5.5	9.7	4.8
	2008	4	22	112	4.9	5.1	6	4.9	5.7	6.6	6	6.3	6.6	5.4
	2008	4	23	113	4.2	5.3	5.5	4.6	6.6	7.2	6.9	6.5	7.4	4.5
	2008	4	24	114	5.7	6.1	6.7	4.5	6.7	8.4	7.1	6.3	5.4	6.6
	2008	4	25	115	4.9	5.3	5.8	4.2	5.5	6.9	6.9	6.5	8.7	5.5
	2008	4	26	116	4.4	5	5.7	4.6	5.2	6.9	7.8	5.8	11.5	4.7
	2008	4	27	117	4	4.2	4.8	3.5	3.8	5.6	6.4	4.4	10.2	4.5
	2008	4	28	118	4.8	5.5	6.4	5.1	6.9	7.5	5.2	5.2	5	5.2
	2008	4	29	119	4.3	5	5.8	4.7	6.2	6.6	4.7	4.6	5.7	4.6
	2008	4	30	120	4.2	4.8	5.6	4.6	6	6.2	4.2	4.6	4.6	4.5
	2008	5	1	121	4	4.7	5.3	4.4	5.8	5.7	4.1	5.3	0.6	4.3
	2008	5	2	122	5	5.5	6.4	4.9	6.7	7.2	5.1	5.2	4.7	5.5
	2008	5	3	123	5	5.3	6.3	4.5	5.9	6.9	5.3	5	5.5	5.6
	2008	5	4	124	5.5	5.6	6.7	4.6	6.3	6.7	4.5	5.1	2.4	6.3
	2008	5	5	125	5	5.4	6.5	5.1	6.5	7.1	5.1	5.1	5.7	5.5
	2008	5	6	126	4.5	5	5.8	4.7	6.1	6	4.5	4.7	6.5	4.9
	2008	5	7	127	4.2	4.8	5.5	4.5	6	5.7	3.8	4.1	6.6	4.5
	2008	5	8	128	3.2	3.6	4	3.2	3.5	3.7	3.8	3.8	4.3	3.5
	2008	5	9	129	3.3	3.7	4.2	3.5	3.8	3.8	3.3	3.8	2.3	3.7
	2008	5	10	130	4.3	4.8	5.6	5.1	5.9	4.9	3.8	4.2	1.7	4.5
	2008	5	11	131	3.8	4.1	4.7	4.6	4.4	3.4	3.9	4.9	5.6	3.9
	2008	5	12	132	4.5	4.8	5.7	4.5	5.3	5.1	4.3	4.9	5	5
	2008	5	13	133	4.7	5.2	6.1	5.1	6.2	6.1	5	5.1	7.6	5
	2008	5	14	134	4.8	5.5	5.8	5.5	6.9	5.3	5.3	5.6	6.7	5
	2008	5	15	135	2.3	2.7	2.8	2	1.6	2.7	4.5	4.1	7.2	2.6
	2008	5	16	136	4.5	5	5.9	5.2	6	6	4.8	5.4	2.3	4.8
	2008	5	17	137	5.2	5.6	6.7	5.3	6.6	6.6	4.9	5.2	6	5.7
	2008	5	18	138	4.4	4.7	5.5	4.3	5	5.7	5.1	5.1	7.2	4.9
	2008	5	19	139	5.9	6.1	7.6	5.7	7.4	8.1	5.5	5.9	5.3	6.6
	2008	5	20	140	5.7	6.1	7.1	5.6	7.2	7.9	6.7	6.5	7.8	6.3
	2008	5	21	141	5.8	6.3	7.5	5.9	7.2	8.8	7.3	6.7	10	6.4
	2008	5	22	142	5.7	6.7	7.1	5.7	8.3	9.2	8.1	7	9.6	6.2
	2008	5	23	143	6.4	6.8	8.2	6.2	7.7	9.8	8.3	6.8	10.3	7.1
	2008	5	24	144	6	6.6	7.3	5.8	8	8.7	7.6	6.5	8.8	6.6
	2008	5	25	145	5.1	5.9	6.5	5.5	7.3	7.6	6.5	6.1	8.3	5.5
	2008	5	26	146	3.8	4.3	4.6	3.3	3.7	5	5.7	5.7	7.3	4.3
	2008	5	27	147	5.8	6	7.2	5.2	6.8	7.7	5.9	5.9	6	6.5
	2008	5	28	148	6.9	7.1	8.8	6.1	8.2	9.7	6.9	5.8	6.2	7.9
	2008	5	29	149	6.2	6.4	7.8	5.6	7.1	9.2	7.9	6.9	9.1	7
	2008	5	30	150	6	6.7	7.6	6	8.5	9.1	6.3	5.9	8.6	6.7
	2008	5	31	151	6.1	6.6	8	6.4	8.1	9	6.8	6.8	10.4	6.7
	2008	6	1	152	6.5	6.9	8.4	6.5	8.1	9.9	7.6	6.9	9.2	7.1
	2008	6	2	153	6	6.7	7.6	6.1	7.9	9.2	8.2	6.9	6.8	6.6
	2008	6	3	154	5.9	6.6	7.4	6.3	7.9	8.3	7.7	6.6	9.9	6.3
	2008	6	4	155	6.3	7	7.7	6.4	8.9	8.8	7.2	6.7	9	6.9
	2008	6	5	156	7.5	7.4	8.6	5.8	8.2	10.2	8.1	7.5	8.9	8.7
	2008	6	6	157	6	6.7	7.6	6.1	8.2	9.4	7.9	7	8.4	6.5
	2008	6	7	158	5.1	5.9	6.8	6	6.8	7.6	7.1	7.1	8	5.4
	2008	6	8	159	5.4	6.3	7.3	6.4	7.4	8.6	7.4	6.7	8.4	5.7
	2008	6	9	160	5.3	6.2	7	6	7.2	8.4	7.8	6.9	8.9	5.7
	2008	6	10	161	5.5	6.1	7.1	5.8	7	8	7.3	6.1	9.9	6
	2008	6	11	162	5.6	5.6	6.7	4.5	5.5	7.4	6.7	6	7.7	6.4
	2008	6	12	163	5.6	5.8	6.9	5	6.3	7.5	6.3	5.8	6.3	6.3
	2008	6	13	164	6.1	6.6	7.9	6.5	7.9	8.4	6.8	6.3	8.2	6.6
	2008	6	14	165	5.9	6.7	7.5	6.5	8	8.5	7.8	6.8	8.2	6.3
	2008	6	15	166	6	6.9	7.4	6	8.3	9.1	8.6	7	8.7	6.6
	2008	6	16	167	6.1	6.8	7.5	6.1	8	8.7	8	7.1	9.5	6.7
	2008	6	17	168	7.4	7.7	8.7	6.2	9	10.4	8	7	8.9	8.5
	2008	6	18	169	8.7	8.6	9.9	6.4	9.7	11.7	8.6	7.2	8.8	10.2
	2008	6	19	170	7.3	7.7	8.6	6.3	9.2	11	8.7	7.5	8.8	8.4
	2008	6	20	171	7.2	7.9	8.5	6.1	9.6	11.8	9.5	7.5	9.5	8.2
	2008	6	21	172	6.3	7.3	7.6	6.1	9.2	10.6	9.4	6.8	10.2	6.9
	2008	6	22	173	6	7.1	7.5	6.2	9	10	8.5	6.5	8.7	6.5
	2008	6	23	174	6.2	7.2	7.2	5.9	9.1	9.4	8.2	6.5	9.3	6.9
	2008	6	24	175	5.8	6.9	7.3	6	9	10	8.4	7.1	9.6	6.3
	2008	6	25	176	6.3	7.3	7.5	6	9.1	10.4	9.4	7.4	11.7	6.9
	2008	6	26	177	7.2	7.9	8.4	6.5	9.5	11.2	10.1	7.8	11.1	8.1
	2008	6	27	178	7.9	8.3	8.7	6.2	9.8	12	10.3	7.8	12.2	9.1
	2008	6	28	179	8.6	8.6	9.2	6.1	9.3	11.8	10.6	8	10.9	10
	2008	6	29	180	7	7.6	8.3	6.7	8.9	10.2	10.1	7.4	12.4	7.7
	2008	6	30	181	7	7.6	8.4	6.6	9	10.1	9.3	6.7	12	7.8
	2008	7	1	182	6.8	7.4	8.2	6.5	9	10	8.5	7.5	12	7.5
	2008	7	2	183	6.1	7.2	7.8	6.6	9	10.2	9.2	7	14.1	6.6
	2008	7	3	184	7.2	7.8	8.8	6.6	9.4	11.4	9.3	6.8	9.9	8
	2008	7	4	185	7.2	7.6	9.1	6.6	9.1	11.3	8.3	6.9	12.2	8.1
	2008	7	5	186	6.5	7.3	8.1	6.5	8.8	10.2	9	7.2	11.3	7.1
	2008	7	6	187	5.7	6.7	7.5	6.4	8	9.5	9	7.8	12.2	6.1
	2008	7	7	188	6.2	7.3	7.4	5.9	9.4	10.1	9.2	5.9	11.6	6.8
	2008	7	8	189	6.5	7.3	7.5	5.5	9.4	10.3	8.1	6.8	11.1	7.3
	2008	7	9	190	6.5	7.3	7.6	5.9	9	10.1	8.8	7.4	10.8	7.2
	2008	7	10	191	6.2	7.1	7.7	6.1	8.6	10	9.2	7.5	12.7	6.8
	2008	7	11	192	6.3	7.2	7.6	6.1	8.7	10.2	9.7	7.6	12.2	6.9
	2008	7	12	193	6.2	7.3	7.8	6.3	8.8	10.8	10.2	7.9	12.6	6.8
	2008	7	13	194	6.6	7.1	8.5	6.6	8.2	10.4	8.8	7.5	11.8	7.3
	2008	7	14	195	6.5	6.9	7.8	5.8	7.9	9.9	8.8	7.7	2.9	7.4
	2008	7	16	197	6	7.1	7.1	6.2	8.7	8.9	9.6	7.3	5.7	6.5
	2008	7	18	199	5.9	6.8	6.9	5.6	8.3	8.9	9.3	7.5	5.7	6.4
	2008	7	19	200	6.2	7.3	7.5	6.1	8.9	10.6	10.6	7.7	8.2	6.8
	2008	7	20	201	6	7.2	7.3	5.9	8.7	10.4	10.9	8.2	5.1	6.5
	2008	7	21	202	6.2	7.1	7.7	6.1	8.2	10.1	10	7.8	4.7	6.8
	2008	7	22	203	7.4	7.6	8	5.3	8.1	10	9.1	7.1	3.2	8.7
	2008	7	23	204	8.8	8.5	8.9	5.5	8.8	11.5	10.5	8.2	4.2	10.4
	2008	7	24	205	7.1	7.4	8.1	5.5	8.1	10.9	10	7.2	4.4	8.2
	2008	7	25	206	7.9	8.1	8.6	5.6	8.9	11.8	10.5	7.3	6.1	9.2
	2008	7	26	207	6.4	7.1	7.6	5.6	8.3	10.3	9.4	6.8	5	7.2
	2008	7	28	209	7.3	7.5	7.6	4.9	8.3	10.2	8.3	7.3	6.9	8.7
	2008	7	29	210	6.5	6.9	7.5	5.1	7.6	9.9	9.1	7.5	11.6	7.5
	2008	7	31	212	5.8	6.9	7.3	5.7	8.4	10.1	9.8	7	12.7	6.4
	2008	8	1	213	6.1	6.7	7.8	5.9	7.6	9.8	9.1	7.2	13.9	6.8
	2008	8	2	214	6.4	6.8	7.8	5.5	7.7	9.8	8.6	6.9	10.1	7.3
	2008	8	3	215	6.5	7	7.9	5.8	7.9	10.1	9.6	7.9	8.6	7.3
	2008	8	4	216	6.8	7.2	8.3	5.9	7.9	10.9	9.9	7.3	9.9	7.7
	2008	8	5	217	7.3	7.2	8.7	5.9	7.7	10.7	9	7.4	9.4	8.4
	2008	8	6	218	7.1	7.2	8.8	6.2	7.6	10.5	9.7	6.4	9.1	8
	2008	8	7	219	6.1	6.2	7.5	5.1	6.4	9	8.5	6.3	13.3	7
	2008	8	8	220	5.9	6.2	7.2	5.1	6.3	9	9.2	6.4	13.4	6.7
	2008	8	9	221	5.7	6.4	7.2	5.3	7	9.3	9.3	6.2	14.8	6.4
	2008	8	10	222	6.3	6.7	7.5	5.3	7.1	8.9	8.8	6.2	12.7	7.2
	2008	8	11	223	5.5	6	6.7	4.9	6	8.2	9.3	6.8	13.9	6.2
	2008	8	12	224	5.7	6.2	7.3	5.9	6.8	9.2	8.7	6.5	14.6	6.2
[truncated: 3,423 more rows]

## Sheet: 10 Years ave. ETo-PM
					PM ETo Values
	MON	DAY	DOY	2008	2009	2010	2011	2012	2013	2014	2015	2016	2017	Average
	1	1	1	0.7	0.5	0.9	0.6	0.6	0.6	0.7	0.6	0.4	0.6	0.62
	1	2	2	0.7	0.5	1	0.8	0.5	0.7	0.6	0.6	0.5	0.7	0.66
	1	3	3	1.1	0.5	0.9	0.6	1	1.2	0.8	0.9	0.6	0.9	0.85
	1	4	4	1.1	0.6	1.2	1.2	1.3	0.7	0.5	0.7	0.5	0.6	0.84
	1	5	5	0.7	0.5	0.6	0.7	1.3	0.5	0.5	0.7	0.4	0.6	0.65
	1	6	6	0.5	0.9	0.9	0.7	0.8	0.7	0.8	1	0.5	1	0.78
	1	7	7	0.8	0.6	0.7	0.7	0.6	0.6	0.8	0.6	0.6	0.6	0.66
	1	8	8	0.7	0.9	1.3	0.7	0.7	0.6	1.3	0.6	0.7	0.8	0.83
	1	9	9	1	0.8	1.3	0.7	0.8	0.4	1.1	0.5	0.7	0.7	0.8
	1	10	10	0.8	0.9	1.4	0.7	1.1	0.6	1.3	0.7	0.9	0.8	0.92
	1	11	11	0.6	0.8	1	0.8	0.9	0.6	1.1	0.7	0.7	1	0.82
	1	12	12	0.6	0.8	1	0.7	0.8	0.6	1	0.6	0.8	0.9	0.78
	1	13	13	0.6	0.7	0.6	0.6	0.7	0.6	0.7	0.7	0.7	0.7	0.66
	1	14	14	0.6	0.9	0.7	0.7	0.6	0.7	0.6	0.7	0.7	0.8	0.7
	1	15	15	0.6	1.3	0.6	0.7	0.6	1	0.8	0.5	1	1	0.81
	1	16	16	0.8	1.3	0.8	1	0.7	1.1	0.6	0.7	1.1	0.9	0.9
	1	17	17	0.8	1.3	0.9	1	0.7	1.1	0.7	0.7	1	1.1	0.93
	1	18	18	0.8	1.2	0.9	0.8	0.7	1.1	0.9	0.8	1.1	1.1	0.94
	1	19	19	0.8	0.7	0.5	0.6	0.6	0.9	0.9	1	0.8	0.9	0.77
	1	20	20	0.8	0.8	0.5	1	0.6	0.9	0.9	1	0.8	1	0.83
	1	21	21	0.8	0.8	0.7	0.9	0.7	0.9	1	1.1	0.9	1.3	0.91
	1	22	22	0.9	1.8	0.9	0.9	0.7	1.5	1	1.5	1.2	1.7	1.21
	1	23	23	0.9	1	0.9	0.9	0.8	1.2	1.1	1.2	1.1	1.2	1.03
	1	24	24	0.8	0.9	0.6	0.8	0.8	1.6	0.9	1.8	1.4	2	1.16
	1	25	25	0.8	0.7	0.9	1.1	0.5	0.9	1.1	1.1	0.7	1.1	0.89
	1	26	26	1	0.8	0.7	1	0.5	0.9	1.1	1.2	0.7	1	0.89
	1	27	27	0.6	1	0.9	0.8	0.8	0.9	0.9	1	0.7	0.7	0.83
	1	28	28	0.9	0.6	0.5	1.2	1.2	1.1	1.5	1.1	0.9	1	1
	1	29	29	0.8	1	1.1	1.6	1.2	1.3	1.2	1.1	1.1	0.9	1.13
	1	30	30	1	0.5	0.5	1.2	0.9	1.1	1.5	1	1.3	0.9	0.99
	1	31	31	0.9	1.1	1.3	1.4	0.8	0.9	1.7	0.8	1.1	0.9	1.09
	2	1	32	1	1	0.9	1.2	1	1.2	1.4	1.4	1.3	1.1	1.15
	2	2	33	1	0.8	0.8	0.7	1.1	1.2	1.1	1.3	1.2	0.9	1.01
	2	3	34	1.1	1	0.5	1	1.2	1.3	1.3	1.6	1.5	1.4	1.19
	2	4	35	1.1	0.8	0.9	0.9	1.2	1.7	1.1	1.5	1.7	1.3	1.22
	2	5	36	1.1	1	0.9	1.2	1	1.1	1.3	1	1.1	1.4	1.11
	2	6	37	1.2	1.1	0.9	1	1.2	1.1	1.5	1.3	1.1	1.3	1.17
	2	7	38	0.7	1.2	1.2	1	0.9	1	1.5	1.3	1	1.1	1.09
	2	8	39	1.2	1.3	0.9	1.8	1.1	1.4	1.7	1.6	1.4	1.9	1.43
	2	9	40	1.5	1.4	0.7	1.6	1	2	1.6	1.3	1.7	1.3	1.41
	2	10	41	1.3	1.1	1	1.1	1.4	1.6	1.7	1.4	1.5	1.3	1.34
	2	11	42	1.2	1.7	1.2	1.3	1.5	1.3	2.3	1.6	1.6	1.6	1.53
	2	12	43	1.3	1.1	1.1	1.2	1.1	1.2	1.6	1.1	1.5	1.2	1.24
	2	13	44	1.1	0.9	1.1	0.9	1.4	1.4	1.7	1.2	1.5	1.2	1.24
	2	14	45	1.3	1.4	1.3	0.9	1.4	1.2	1.7	1.1	1.2	1.1	1.26
	2	15	46	0.9	0.8	0.6	1.3	1.9	1.8	1.8	1.5	1.9	1.5	1.4
	2	16	47	0.7	0.8	1.2	1.5	1.8	1.7	1.6	1.5	2.2	1.4	1.44
	2	17	48	0.8	1.2	1.3	1.6	1.5	1.7	2.2	1.5	2.2	1.5	1.55
	2	18	49	1.1	1.1	1.6	1.9	1.4	1.6	2.5	1.7	2.6	1.8	1.73
	2	19	50	1.3	1.3	1.6	1.8	1.4	1.8	2.3	1.7	2.5	2.1	1.78
	2	20	51	1.5	1	1.7	1.2	1.4	1.7	1.6	1.4	2.6	1.8	1.59
	2	21	52	1.9	0.7	1.2	2.1	1.7	1.8	2.5	1.4	2	2.2	1.75
	2	22	53	1.8	1.3	1.9	2.1	2	1.8	3.3	1.7	2	2.2	2.01
	2	23	54	1.5	0.9	1.5	2.2	1.9	2	2.8	1.9	1.9	2.3	1.89
	2	24	55	1.5	0.8	1.7	2.1	2	1.7	3.1	1.6	1.8	2.1	1.84
	2	25	56	2.3	0.9	0.9	2.2	2.1	2.2	2.5	1.7	2.1	2.2	1.91
	2	26	57	2.1	1	0.8	2.2	3.1	2.1	3.2	1.9	2.2	2.5	2.11
	2	27	58	1.8	1.3	1.6	1.9	1.9	2.2	2	2.1	2.2	2.6	1.96
	2	28	59	2	1	0.7	2	1.8	1.9	2.3	1.6	2.2	3	1.85
	3	1	60	2	1.1	1.8	2.4	1.3	1.9	2.6	2.1	1.3	3.4	1.99
	3	2	61	1.9	1.8	1.8	2.6	1.1	1.5	2.5	1.6	2	2.5	1.93
	3	3	62	1.4	1.4	1	1.5	0.7	1.2	1.7	1.1	1.6	1.4	1.3
	3	4	63	2.2	0.8	1.8	2.1	1.5	2.4	2.5	2.1	2.5	2.3	2.02
	3	5	64	2.2	1.2	0.8	2	1.7	2.2	2.2	2.4	2.7	2.4	1.98
	3	6	65	2.4	1.2	1.3	2.7	1.8	1.9	2.3	2.2	2.4	2.2	2.04
	3	7	66	2.4	2.2	1.9	2	1.7	2.5	2.3	2.7	2.3	2.6	2.26
	3	8	67	3	1.5	1.7	2.7	1.7	2.1	3.2	2.5	2.4	3	2.38
	3	9	68	2.3	2.9	2.1	2.6	2.3	3.1	3.8	3.8	3.2	4	3.01
	3	10	69	1.6	2.7	2.5	2.4	1.6	2.4	3.2	2.9	2.6	4.1	2.6
	3	11	70	2.8	1.5	2.1	2.6	1.6	1.8	3.2	1.8	1.7	3.4	2.25
	3	12	71	2.3	2.7	2.7	2.7	1.9	2.1	3.2	2	1.9	3.5	2.5
	3	13	72	2	1.7	1.9	2.6	1.7	2.2	2.8	1.7	2	2.9	2.15
	3	14	73	1.4	1.6	1.6	2.3	2.3	2.4	2.3	2.1	2.4	2.6	2.1
	3	15	74	2.5	1.1	2.2	2.6	1.9	2.2	2.6	2	1.9	2.3	2.13
	3	16	75	2.5	2.1	2.2	3.8	1.8	2.5	3	1.9	1.9	2.9	2.46
	3	17	76	2.6	2.5	2.6	3.6	1.1	1.5	2.5	1.2	1.2	2.3	2.11
	3	18	77	3.3	1.9	2.1	3.3	2	2.4	2.5	2.5	2.4	2.2	2.46
	3	19	78	2.8	2.3	2.3	3.4	2.3	3.1	3.2	2.9	3.4	2.8	2.85
	3	20	79	2.5	1.8	2.4	2.7	2.9	3.2	3.3	2.7	2.8	2.9	2.72
	3	21	80	2.9	2.9	3	3.3	3	3.2	3.3	2.4	2.8	3	2.98
	3	22	81	4.1	3.1	3.7	2	3.5	2.8	3.2	1.9	2.4	1.4	2.81
	3	23	82	4	1.4	3.6	2.2	3.6	3.1	2.9	3.1	3.5	2.3	2.97
	3	24	83	3.8	2.1	3.5	2.7	3.9	3.3	4.2	3	4.1	3.8	3.44
	3	25	84	3.3	2.6	3.2	2.8	3.8	3.2	3.8	3	3.7	3	3.24
	3	26	85	3.1	2.1	3.2	3.2	3.7	3.1	3.7	3.2	3.4	3.4	3.21
	3	27	86	3	2	3.4	3.4	3.1	2.8	3.4	3	3	3.2	3.03
	3	28	87	2.8	1.6	2.4	3.7	2.5	2.5	4.2	2.6	2.6	3.9	2.88
	3	29	88	2.2	2.9	2.3	4.2	2.8	3.4	4.2	3	3	4	3.2
	3	30	89	3.5	3.3	2.8	3.7	2.1	2.9	2.9	2.5	2.2	3.7	2.96
	3	31	90	2.7	3.4	3.4	3.7	2.1	2.5	3.3	2.2	2.1	3.4	2.88
	4	1	91	3.6	2.9	2.3	3.5	2.5	3.9	3.8	2.6	3.3	3	3.14
	4	2	92	3.3	3.5	3.4	4.8	2.9	3.7	4.3	2.8	3.4	4	3.61
	4	3	93	3.3	3.4	4.1	4	4.4	4.7	4.1	3.8	4.7	3.3	3.98
	4	4	94	3.2	3	3.8	4	4.1	4.7	4.5	3.9	4.7	4.3	4.02
	4	5	95	3.6	3.4	3.8	4	4	4	4.3	3.6	4.1	4.1	3.89
	4	6	96	3	2.5	3.9	4.3	4	4.3	4.8	3.7	4.1	4.5	3.91
	4	7	97	1.5	3.3	3.5	3.9	4.9	4.5	5.4	4	4.2	4.3	3.95
	4	8	98	3.6	2.8	2.5	4.2	2.8	3.2	4.7	2.7	3	4.1	3.36
	4	9	99	2.7	3.4	2.8	4.1	3.5	3.2	4.3	3.5	3.5	3.7	3.47
	4	10	100	3.6	3.5	2.9	4.2	4.3	3.8	4.4	3.7	4.5	3.9	3.88
	4	11	101	3.6	3.8	1.4	3.6	4.2	3.9	4.2	3.7	4.6	4	3.7
	4	12	102	4.5	3	3.4	3.2	3.6	3	4.8	2.4	2.9	4.1	3.49
	4	13	103	4.3	3.6	3.6	3.4	2.2	2.6	4.2	1.8	2.1	4	3.18
	4	14	104	4.1	3	4	3.7	3.6	3.8	4.4	2.7	3.1	4.2	3.66
	4	15	105	4.2	2.6	4	4.4	3.5	4.1	4.1	3.5	3.6	4.7	3.87
	4	16	106	3.9	3.2	3.8	4.8	3.5	3.9	4.2	3.8	3.8	4.9	3.98
	4	17	107	3.6	2.7	3.6	4.7	3.9	3.8	4.7	4.5	4.9	4.8	4.12
	4	18	108	3.4	1.9	3.8	5	4	3.6	5.1	4.1	4.4	4.2	3.95
	4	19	109	4.2	3.8	4.4	5.4	4.6	4.2	5.4	4.8	5.3	4.6	4.67
	4	20	110	4.6	3.3	3.8	4.5	4.2	4.3	4.6	4.8	5.7	5	4.48
	4	21	111	4.9	3.3	2.9	4.3	3.9	3.6	4.9	4	4.6	4.8	4.12
	4	22	112	4.2	3.6	3.7	4.5	4.5	3.9	4.9	3.7	4.7	4.9	4.26
	4	23	113	5.7	4.2	4	4.1	4.7	3.9	5.4	3.6	4.2	4.8	4.46
	4	24	114	4.9	3.8	4	5.3	4.4	4.6	4.8	3.6	5.1	4.4	4.49
	4	25	115	4.4	3.3	5	4.2	5.6	4.7	5.6	4.2	5.3	4.6	4.69
	4	26	116	4	3.9	4.2	4.5	5.4	5.3	5.9	4.6	5.9	5.2	4.89
	4	27	117	4.8	3.4	2.3	4.7	4.4	4.7	5	4.3	4.5	5.4	4.35
	4	28	118	4.3	3.4	2.6	4.7	3.9	4	5.7	3.8	3.8	5.6	4.18
	4	29	119	4.2	4.1	4.1	4.5	4.9	5.2	4.9	4.9	4.7	5.4	4.69
	4	30	120	4	4.2	3.2	4.9	4.6	5.3	4.8	4.9	4.6	5.6	4.61
	5	1	121	5	4.1	3.6	4.7	3.4	4.1	5	3.7	3.6	5.8	4.3
	5	2	122	5	4.6	4.1	4.7	2.9	3.7	4.8	3.2	2.9	5.1	4.1
	5	3	123	5.5	4.8	5.3	4.7	3.5	4.9	5.4	3.9	4	4.5	4.65
	5	4	124	5	2.4	4.7	5.1	4.2	5.4	6.1	4.7	4.9	5.1	4.76
	5	5	125	4.5	2.9	5.1	5.1	4.6	5.4	7.4	5.6	4.8	5.4	5.08
	5	6	126	4.2	3.6	4.8	4.8	4.8	5.7	6.2	5.2	4.7	5.5	4.95
	5	7	127	3.2	3.3	4.9	4.9	4.7	5.1	5.6	4.9	4.4	5.1	4.61
	5	8	128	3.3	4.3	4.9	4.9	4.5	5.2	5.7	5.3	4.4	5.1	4.76
	5	9	129	4.3	3.7	3.3	4.7	4.3	5.1	5	4.8	4.9	5.9	4.6
	5	10	130	3.8	4	5.1	5.3	5.6	5	5.6	5.6	5	5.8	5.08
	5	11	131	4.5	4	4.9	5.5	5.2	4.7	5.3	6	5.5	5.5	5.11
	5	12	132	4.7	4.4	5.3	4.4	6	4.6	5.5	5.1	5.6	5.5	5.11
	5	13	133	4.8	4.8	5.6	4.4	6.4	4.5	5.8	5.1	5.5	6	5.29
	5	14	134	2.3	5.5	5.5	4.7	5.2	4.4	5.4	5.3	6.2	7.1	5.16
	5	15	135	4.5	5.3	4.7	4.9	5.2	4.9	5.3	5.6	6.2	6.3	5.29
	5	16	136	5.2	5.5	5	4.9	5.5	5.1	5.8	5.8	6.4	5.5	5.47
	5	17	137	4.4	5.3	5.5	5.1	5.4	5.3	5.6	6	5.9	5.4	5.39
	5	18	138	5.9	5.5	5.2	5.3	5.3	4.6	6.3	4.9	4.9	5.7	5.36
	5	19	139	5.7	5.6	5	4.9	5.2	4.6	5.7	5.2	4.8	5.7	5.24
	5	20	140	5.8	3.6	5.1	5.1	3.9	3.4	5.9	4	3.5	5.2	4.55
	5	21	141	5.7	3.7	5.2	5.2	6.1	5.4	5.9	6.3	5.5	5	5.4
	5	22	142	6.4	5.2	4.9	5.2	4.6	4.7	5.6	4.9	4.8	5.1	5.14
	5	23	143	6	5.4	4.7	5.7	4.1	4.9	5.6	4.5	4.8	4.6	5.03
	5	24	144	5.1	5.2	4.7	5.1	6	6.6	5.4	6.2	5.9	5	5.52
	5	25	145	3.8	6.5	5.3	5.4	5.3	5.8	5.8	6.5	5.6	6.2	5.62
	5	26	146	5.8	5.6	5.3	5.9	4.7	5.5	5.6	5.6	5.2	5.8	5.5
	5	27	147	6.9	4.9	5.1	6.1	5.6	6.2	5.8	6.2	5.7	5.6	5.81
	5	28	148	6.2	5.2	4.3	5.4	6.5	6	6.7	6.1	5.7	5.5	5.76
	5	29	149	6	5.6	6	5.5	7.1	6.6	7.5	6.3	6.2	6.6	6.34
	5	30	150	6.1	5.7	6.4	5.8	6.8	6.3	7	5.8	5.5	6	6.14
	5	31	151	6.5	5.9	6.3	5.9	6.5	6.6	6.8	5.9	5.8	5.9	6.21
	6	1	152	6	5.9	6.1	6.3	6.1	6.5	6	6.4	6.2	5.8	6.13
	6	2	153	5.9	5.9	6	5.7	6.2	6.2	5.8	6	6.2	5.6	5.95
	6	3	154	6.3	5.7	6	5.7	6.2	6.3	5.7	6.3	6.2	6	6.04
	6	4	155	7.5	5.3	5.7	6.1	6.2	5.9	5.8	5.7	6	6.1	6.03
	6	5	156	6	5.8	6	5.9	6.7	6	5.6	6.3	6.2	6.5	6.1
	6	6	157	5.1	5.8	7.2	6.2	8	6.7	6.3	6.6	7.1	7.2	6.62
	6	7	158	5.4	4.9	5.7	6.5	6.5	5.7	5.5	5.9	6	5.7	5.78
	6	8	159	5.3	4.9	4.6	6.8	5.7	5.7	5.4	5.9	5.9	6	5.62
	6	9	160	5.5	4.8	5.3	6.5	5.5	5.8	5.6	5.9	5.9	6.4	5.72
	6	10	161	5.6	6.3	5	6.7	5.9	6.3	5.8	6.4	6.2	6.7	6.09
	6	11	162	5.6	5.1	5.1	5.9	6.8	6.9	6.2	6.9	6.9	7.2	6.26
	6	12	163	6.1	6.3	6.2	6	8.4	7.6	6.9	7.2	7.3	7.4	6.94
	6	13	164	5.9	4.8	6.4	5.9	8.1	6.9	6.7	6.8	6.7	7	6.52
	6	14	165	6	5.9	6.4	5.4	6.1	5.3	6.4	5.4	5.4	5.9	5.82
	6	15	166	6.1	5.4	5.9	5.5	6.6	6.1	5.9	6.4	6.5	5.8	6.02
	6	16	167	7.4	6	6	6.2	7	6.9	6	6.9	7.1	6.6	6.61
	6	17	168	8.7	4.8	5.8	6.8	7.3	7	6.3	6.9	6.7	6.4	6.67
	6	18	169	7.3	5.7	7.1	6.4	8.3	6.4	7.5	6.5	6.3	6	6.75
	6	19	170	7.2	6.7	7.6	7.4	8.8	7.1	8.6	7.1	7.2	6.9	7.46
	6	20	171	6.3	7	6.8	7	7.6	7.5	7.1	7.3	7.7	6.7	7.1
	6	21	172	6	6.7	6.2	6.9	6.7	6.6	6.6	6.5	6.9	6.7	6.58
	6	22	173	6.2	8	6.1	6.9	6.8	8.3	5.8	8.4	8.6	7.2	7.23
	6	23	174	5.8	6.2	5.7	5.6	6.6	7.5	5.8	7.5	7.7	6.6	6.5
	6	24	175	6.3	4.3	4.7	6.3	6.5	5.9	6.1	6	6.3	5.7	5.81
	6	25	176	7.2	6.7	5.4	5.8	6.2	7.2	5.1	7.1	7.5	6.3	6.45
	6	26	177	7.9	7.7	5.6	7.2	6.4	8.6	5.9	7.8	8.4	8.3	7.38
	6	27	178	8.6	6.5	6.2	6.7	7.2	7.5	6.6	7.1	7.4	7.1	7.09
	6	28	179	7	6.2	7	5.8	8	7	7.2	6.6	7.1	6.6	6.85
	6	29	180	7	5.9	7.6	6.5	8.5	6.4	7.9	6.1	6.2	6	6.81
	6	30	181	6.8	7	6.1	5.8	6.8	7.6	6.4	7.1	7.4	7.4	6.84
	7	1	182	6.1	7.2	6.9	6.6	7	7.3	6.9	7.4	7.4	7.4	7.02
	7	2	183	7.2	7.3	5.8	6.6	6.4	7.2	6.4	7.5	7.4	7.5	6.93
	7	3	184	7.2	8	6.1	6.8	5.7	8.1	5.7	8.2	8.3	8.7	7.28
	7	4	185	6.5	7.7	6.8	6.7	6.9	8.4	6.8	8.4	8.5	8.4	7.51
	7	5	186	5.7	6.2	7	5.7	7	7.8	6.9	7.7	7.9	7.8	6.97
	7	6	187	6.2	7.4	6.4	6	6.3	8.3	6.1	8.2	8.3	8.4	7.16
	7	7	188	6.5	6.8	5.8	6.6	6	7.6	5.5	7.6	7.8	7.1	6.73
	7	8	189	6.5	5.5	5.8	7.9	6.6	6.3	5.9	6.4	6.4	5.7	6.3
	7	9	190	6.2	7.3	6.8	6.2	7	7.5	6.1	7.3	7.5	6.7	6.86
	7	10	191	6.3	8.3	6.2	5.9	6.9	8.8	6.4	8.7	8.6	8.8	7.49
	7	11	192	6.2	7.7	6	7.1	6.6	8.2	5.9	8	8	8	7.17
	7	12	193	6.6	7.1	6.1	7.1	6.6	7.5	5.8	7.7	7.3	7.3	6.91
	7	13	194	6.5	7	5.9	6.2	6.6	7.5	5.5	7.5	7.3	7.2	6.72
	7	14	195	6	5.8	6.3	6.2	7.3	7.1	6.3	7	7.1	6.8	6.59
	7	15	196	5.9	4.8	6.3	7.2	7.4	7.4	6.6	7.4	7.4	7.3	6.77
	7	16	197	6.2	5.7	6.2	7.7	7.1	6.3	6.1	6.5	6.2	6	6.4
	7	17	198	6	5.9	5.4	7.5	6.4	6.4	5.3	6.7	6.6	6.1	6.23
	7	18	199	6.2	5.6	5.2	6.7	6.6	6.6	5.1	6.8	6.8	6.4	6.2
	7	19	200	7.4	5.9	5.6	5.9	6.5	6.7	5.4	6.9	6.8	6.4	6.35
	7	20	201	8.8	6.7	5.8	5.2	6.4	6.9	5.2	6.9	6.8	6.4	6.51
	7	21	202	7.1	6.8	5.7	4.9	6	6.9	4.6	7	7	6.2	6.22
	7	22	203	7.9	6.5	5.6	4.8	6.7	6.8	4.5	6.8	6.6	5.6	6.18
	7	23	204	6.4	5.8	7.5	6.1	8.4	6.5	7.2	6.7	6.6	6	6.72
	7	24	205	7.3	6.2	7.9	4.9	9.6	7	7.8	7.1	7.2	6.2	7.12
	7	25	206	6.5	6	6.5	5.3	7.9	6.7	6.6	6.7	6.8	6	6.5
	7	26	207	5.8	5.9	7	5	8.3	6.2	7	6.3	6.2	5.6	6.33
	7	27	208	6.1	6.8	6.1	5.1	6.8	6.9	5.7	7	7	6.9	6.44
	7	28	209	6.4	6	6.6	6.1	7.3	5.9	6.5	6.1	6.2	5.6	6.27
	7	29	210	6.5	5.6	7.3	5.6	8.4	5.9	7.1	6.1	6.2	5.3	6.4
	7	30	211	6.8	6.2	6.5	4.9	7.4	6.1	6.2	6.5	6.4	5.8	6.28
	7	31	212	7.3	5.8	6.3	4.5	7.1	5.9	6.1	5.9	6.1	5.5	6.05
	8	1	213	7.1	6.6	5.9	3.1	6.2	7.1	3.9	7	7.1	5.2	5.92
	8	2	214	6.1	6.3	5.9	4.2	6.5	6.8	4.8	6.8	6.8	5.7	5.99
	8	3	215	5.9	5.1	5.9	6.2	7	6	6.1	6	6	5.4	5.96
	8	4	216	5.7	5.5	6.1	6.1	6.4	5.5	5.6	5.6	5.6	4.9	5.7
	8	5	217	6.3	5.4	5.9	5.4	6.9	5.4	6	5.6	5.5	4.7	5.71
	8	6	218	5.5	5.9	6.1	5.4	7.8	5.9	6.3	5.9	5.9	5.4	6.01
	8	7	219	5.7	5.5	6.5	5.6	7.9	7.3	6.7	7.3	7.1	6.9	6.65
	8	8	220	6.2	5.9	6.2	4.9	7.4	7.3	6.4	7.2	7	7.2	6.57
	8	9	221	6.8	6.2	6.2	5.2	6.6	6.9	5.8	6.7	6.9	6.9	6.42
	8	10	222	6.3	5.9	5.6	4.9	6.2	6.6	5.3	6.4	6.6	6.1	5.99
	8	11	223	6	6.4	6.3	4.9	7.2	7.1	6.1	7	7.2	6.4	6.46
	8	12	224	6	5.3	5.8	4.5	6.4	5.7	5.4	5.6	5.7	4.9	5.53
	8	13	225	5.4	4.9	5.3	2.1	5.9	4.8	3.6	4.8	4.7	2.5	4.4
	8	14	226	5.5	5.4	6.1	4.5	6.8	5.6	6.1	5.5	5.5	4.9	5.59
	8	15	227	5.5	5.3	6.3	4.1	7.1	5.1	6.3	5.1	5	4.4	5.42
	8	16	228	5.5	5.5	5.7	3.7	6.4	5.1	5.4	5.1	5.2	4	5.16
	8	17	229	5	5.8	5.9	4.7	6.5	5.3	6	5.4	5.5	4.7	5.48
	8	18	230	5	5.5	5.8	2.1	6.8	5.7	4.3	5.7	5.6	3.2	4.97
	8	19	231	3.6	5.5	5.1	2.4	5.7	5.5	3.6	5.4	5.3	3.3	4.54
	8	20	232	4.7	5.5	5.2	2.4	5.7	6.3	3.9	6.3	6.3	4.6	5.09
	8	21	233	5.3	6	5.4	2.5	5.7	6.5	3.7	6.4	6.4	4.5	5.24
	8	22	234	5.4	5.9	5.5	2.3	5.9	6.3	4	6.2	6.3	3.9	5.17
	8	23	235	4.9	5.3	5.3	3.5	5.4	5.1	3.9	5.1	5.2	3.4	4.71
	8	24	236	4.6	5.4	5.4	2.5	5.9	5.5	4.1	5.6	5.7	3.8	4.85
	8	25	237	5.2	5.3	5.3	2.3	5.1	5.7	3.5	5.8	5.8	4.2	4.82
	8	26	238	5	5.3	4.9	2.8	5.8	4.9	4.8	4.7	5.1	3.8	4.71
	8	27	239	4.9	5	5.4	1.2	6.2	5	4.4	4.8	5.1	2.8	4.48
	8	28	240	5	5	5.2	1.5	5.9	5.6	4	5.4	5.6	3.4	4.66
	8	29	241	5.2	5.5	4.8	2.9	5.1	6.2	3.9	5.9	6.1	5	5.06
	8	30	242	5.2	4.9	4.8	1.9	5.1	6	3.2	5.8	5.9	4.1	4.69
	8	31	243	4.8	5.3	4.8	2.7	4.9	5.5	3.7	5.7	5.6	4.2	4.72
	9	1	244	5.6	4.8	4.8	2.6	5.1	4.6	3.8	4.7	4.6	3	4.36
	9	2	245	5.3	5.2	5	2.3	5.1	5.3	3.5	5.5	5.3	3.7	4.62
	9	3	246	5.1	5.4	5	2.9	5.2	5.5	3.9	5.6	5.6	4.4	4.86
	9	4	247	4.4	5.1	4.9	2.6	5.3	5.4	4	5.6	5.3	4.3	4.69
	9	5	248	4.5	5.5	5	1.5	5.4	5.2	3.4	5.8	5.4	4.1	4.58
	9	6	249	4.1	4.9	4.6	1.4	5.3	4.2	3	5.1	4.6	2.2	3.94
	9	7	250	4.6	4.3	4.7	4.3	5.6	4	4.7	4.5	4.4	3.5	4.46
	9	8	251	4.2	4.2	4.4	3.7	5.2	4.5	4.3	4.9	4.8	4.1	4.43
	9	9	252	3.9	4	4.4	3.1	5.1	4.2	4	4.7	4.6	3.8	4.18
	9	10	253	4	3.9	4.4	3.8	4.5	4.2	3.9	4.6	4.6	4.2	4.21
	9	11	254	4.5	4.5	4.4	1.2	4.1	5.6	2.2	5.9	5.6	4.4	4.24
	9	12	255	3.7	3.8	4.2	1.8	4.1	4.7	2.6	4.8	4.8	3.5	3.8
	9	13	256	3.2	4.3	4.7	2.9	4.9	4.9	4	4.8	4.9	3.9	4.25
	9	14	257	3.2	3.6	4.1	3.3	4.5	4.1	3.3	4.1	4	2.8	3.7
	9	15	258	3.2	3.8	4.2	2.2	3.8	3.5	2.9	3.5	3.3	2.8	3.32
	9	16	259	1.9	3.7	3.9	3	4	3.9	3	3.8	3.7	3.1	3.4
	9	17	260	3.1	3.6	4.4	3.9	4.6	3.7	3.1	3.9	3.7	2.7	3.67
	9	18	261	2.9	3.1	4.5	2.2	4.7	3.5	3.3	3.6	3.5	2.6	3.39
	9	19	262	2.4	3.5	5.2	2.5	5.1	4.6	4	4.4	4.3	3.4	3.94
	9	20	263	2.8	3.8	3.8	1.9	3.8	5	2	4.9	4.8	3.2	3.6
	9	21	264	3.1	3.1	3.7	1.9	3.5	4.1	2.1	4.4	4.4	2.8	3.31
	9	22	265	2.7	3.9	2.9	2.6	3.6	4.5	2.6	4.7	4.6	3.7	3.58
	9	23	266	3	3.7	3.5	2.1	3.9	4.3	2.5	4.6	4.4	2.7	3.47
	9	24	267	3	3.7	3.3	2.6	3.7	4.3	2.6	4.8	4.2	3.6	3.58
	9	25	268	2.9	3.8	1.7	2.2	3	3.8	2	4.1	3.6	3.1	3.02
	9	26	269	3	3.8	3.3	1.7	3.4	4	2.4	4.1	3.8	3	3.25
	9	27	270	3	3.4	3.9	2.1	4	3.6	3.1	3.7	3.4	2.9	3.31
	9	28	271	3.1	3.2	3.9	2.2	4.2	3.8	2.4	4	4	3.1	3.39
	9	29	272	3	3.3	3.2	1.9	3.4	3.8	1.1	3.9	3.7	2.1	2.94
	9	30	273	2.6	3.3	3.6	1.5	3.8	3.8	1.5	3.8	3.5	1.8	2.92
	10	1	274	2.3	2.8	3.6	2.9	3.8	3.2	3.3	3.3	2.9	2.9	3.1
	10	2	275	2.3	2.9	2.8	2.6	3.5	2.7	3.2	3.1	2.8	2.7	2.86
	10	3	276	2.5	3.2	2.3	2.4	3.8	3.1	3.2	3.4	3.3	2.8	3
	10	4	277	2.5	3.5	3	2.7	2.8	2.8	3	3.2	3.3	3.1	2.99
	10	5	278	2.6	3	2.8	1.2	3.4	2.6	1.8	3.4	3.1	1.7	2.56
	10	6	279	2.9	2.4	3	1.6	3.4	2.4	2.3	3.2	2.9	1.9	2.6
	10	7	280	2.1	2.7	2.5	2.2	3.1	2.4	2.8	2.9	3	2.3	2.6
	10	8	281	2.3	2.7	1.9	1.6	3.2	2.5	2.6	2.8	3.1	2.3	2.5
	10	9	282	2.2	2.5	2.3	1.7	2.5	2.3	2.1	2.4	2.6	2.1	2.27
	10	10	283	2.1	2.9	2.2	2.3	2.7	2.7	2.1	2.9	3	2.3	2.52
	10	11	284	2.4	2.9	2.3	1.7	2.3	2.7	1.6	2.7	2.8	2	2.34
	10	12	285	3	2.7	2	1.9	2.9	3.1	1.9	3.2	3.1	2.3	2.61
	10	13	286	1.4	2.1	1.9	1.9	2.7	2.6	2	2.9	2.8	2.1	2.24
	10	14	287	1.7	2.5	2.2	1	2.5	2.4	1.4	2.6	2.7	1.7	2.07
	10	15	288	1.9	2.7	1.4	1.6	3.2	2.9	1.8	3.1	3.2	1.8	2.36
	10	16	289	1.8	2.9	2.3	2.6	3	2.7	1.8	3.4	3.2	2.2	2.59
	10	17	290	1.8	3.8	2.5	2.7	2.8	3.5	1.5	3.7	3.3	2.2	2.78
	10	18	291	1.6	2.8	2.4	1.9	2.6	2.8	1.7	3.2	2.9	2	2.39
	10	19	292	1.7	2.9	2	1.8	2	2.4	1.2	2.6	2.3	1.4	2.03
	10	20	293	2.1	2.8	2.4	1.2	2.8	3.9	1.4	4.1	3.1	4.1	2.79
	10	21	294	1.5	2.1	1.9	1.4	2.7	2	2.1	2.5	2.5	2	2.07
	10	22	295	1.6	2.1	2.4	1.5	2.5	2.2	1.7	2.6	2.5	1.9	2.1
	10	23	296	1.6	2.2	1.8	1.2	2.9	2.3	0.9	2.2	2.5	1.4	1.9
	10	24	297	1.7	2.1	1.9	1.2	1.9	2	1	2.2	2.2	1.4	1.76
	10	25	298	1.7	2	1.9	2.1	1.6	1.8	2.2	1.7	1.9	2.4	1.93
	10	26	299	1.7	2.1	1.9	2.3	1.8	2.1	2.1	2.3	2.5	2.4	2.12
	10	27	300	1.7	1.3	2	2.3	1.9	1.8	2.1	1.9	2.2	2	1.92
	10	28	301	1.6	1.6	1.7	1.7	1.2	1.7	2	1.1	1.5	1.9	1.6
	10	29	302	1.5	1.6	1.8	1.2	1.7	2.1	1.4	1.6	1.7	1.5	1.61
	10	30	303	1.5	0.7	1.6	1	2.4	2.3	1.8	1.9	2.1	1.7	1.7
	10	31	304	1.6	1.4	1.5	1.5	1.4	1.9	1.3	1.6	1.7	1.6	1.55
	11	1	305	1.6	1.2	1.6	1.7	1.7	1.8	1.2	1.7	1.7	1.3	1.55
	11	2	306	1.6	1.2	1.6	1.5	1.7	1.8	1.2	1.6	1.5	1.2	1.49
	11	3	307	1.4	1.3	1.7	1.5	1.6	1.5	1.3	1.3	1.1	1.3	1.4
	11	4	308	1	1.6	1.7	1.3	1.8	2.6	1.2	2.2	1.7	1.6	1.67
	11	5	309	1.2	1	1.8	0.9	1.8	1.4	1.4	1.9	1.7	1.7	1.48
	11	6	310	1.2	1.8	1.8	1.1	1.8	1.8	1.5	1.9	1.8	1.6	1.63
	11	7	311	1.2	1.8	1.6	1	1.8	1.8	1.4	2.1	2	1.5	1.62
	11	8	312	1.2	1.5	1.4	0.9	1.6	1.5	1.2	1.9	1.9	1.7	1.48
	11	9	313	1.1	1.4	1.5	1.1	1.6	1.3	1.4	1.4	1.6	1.5	1.39
	11	10	314	0.9	1.5	2.1	0.9	1.9	1.4	1.9	1.4	1.6	1.3	1.49
	11	11	315	1	1.4	1.9	1.2	1.8	1.4	1.9	1.4	1.4	1.3	1.47
	11	12	316	1	1.4	1.8	1.3	1.3	1.5	1.5	1.5	1.5	1.4	1.42
	11	13	317	0.9	0.9	1.6	0.8	1.4	1.3	1.4	1.3	1.4	1.2	1.22
	11	14	318	1.1	1.2	1.4	0.9	1.2	1.4	1.1	1.4	1.4	1.4	1.25
	11	15	319	1.1	1.2	1.5	1	1.4	1.4	1.2	1.4	1.6	1.5	1.33
	11	16	320	1	1	1.2	0.7	1.2	1.5	1	1.2	1.6	1.5	1.19
	11	17	321	1.3	0.8	1.2	0.7	1.2	1.2	0.7	1.1	1.2	1.1	1.05
	11	18	322	1.1	1.1	1.4	1	1.1	1.2	1.5	1.1	1.1	1.4	1.2
	11	19	323	0.9	1	1.4	1.1	0.9	1.4	1.4	1.2	1.2	1.4	1.19
	11	20	324	0.9	1.1	1.3	1.1	0.9	1.3	1.2	1.3	1	1.2	1.13
	11	21	325	1.2	1.4	1.3	1.2	1.1	1.5	1.1	1.5	1.5	1.4	1.32
	11	22	326	1.5	1.4	1.3	1	1.2	1.3	0.7	1.4	1.3	1	1.21
	11	23	327	0.9	1.1	1.1	1.1	0.9	1.1	0.8	1.2	0.9	0.8	0.99
	11	24	328	1.1	0.8	1.6	0.8	1.1	1	0.9	1.2	1	0.8	1.03
	11	25	329	1	0.9	1.6	0.8	1.2	0.9	0.9	1	1	0.8	1.01
	11	26	330	1	0.8	1	0.9	0.9	0.9	0.7	0.9	0.9	0.8	0.88
	11	27	331	1.1	0.7	1.1	0.7	0.9	0.8	0.7	0.9	0.7	0.7	0.83
	11	28	332	1.1	0.8	1.3	0.7	1	0.7	0.7	0.7	0.8	0.7	0.85
	11	29	333	0.7	0.7	1.4	1.2	0.9	0.7	0.8	0.7	0.8	0.7	0.86
	11	30	334	0.8	0.8	1	0.8	0.8	0.8	0.8	0.7	0.7	0.8	0.8
	12	1	335	0.9	0.9	1.1	1.4	1	0.8	0.5	0.9	0.8	0.8	0.91
	12	2	336	1	0.7	1.4	1.4	1.1	0.9	0.7	0.7	0.7	0.8	0.94
	12	3	337	1	0.8	1.9	1.1	1.2	1	0.9	0.7	0.9	1	1.05
	12	4	338	0.8	0.8	1.1	1	1	0.7	0.8	0.6	0.7	0.9	0.84
	12	5	339	1	0.7	1.1	1	0.8	0.6	0.9	0.6	0.7	0.7	0.81
	12	6	340	0.8	0.8	1.1	1.5	0.8	0.7	0.8	0.7	0.8	0.9	0.89
	12	7	341	1.2	0.6	0.9	0.8	0.7	0.6	0.7	0.7	0.7	0.7	0.76
	12	8	342	1.1	0.7	1	0.7	0.7	0.7	0.8	0.6	0.6	0.6	0.75
	12	9	343	1.4	0.7	1.1	0.6	1	0.5	0.9	0.7	0.6	0.6	0.81
	12	10	344	1.4	0.6	0.9	0.6	0.9	0.5	0.9	0.6	0.6	0.7	0.77
	12	11	345	0.9	0.7	0.8	0.6	0.7	0.4	0.8	0.6	0.6	0.7	0.68
	12	12	346	0.9	0.6	0.8	0.7	0.8	0.5	0.9	0.7	0.6	0.8	0.73
	12	13	347	0.9	0.7	0.8	0.8	0.9	0.4	0.7	0.7	0.6	0.9	0.74
	12	14	348	0.9	0.8	0.7	0.8	0.8	0.5	0.7	1.1	0.6	1.1	0.8
	12	15	349	0.8	0.8	0.7	0.6	0.7	0.5	0.9	1	0.6	1	0.76
	12	16	350	0.8	0.8	0.8	0.7	0.7	0.5	0.7	0.7	0.6	0.8	0.71
	12	17	351	0.8	1.5	1	1.1	0.6	0.6	0.6	0.8	0.6	0.9	0.85
	12	18	352	0.5	1.5	1.3	1.2	0.6	0.7	0.7	1	0.8	1.1	0.94
	12	19	353	0.7	1.4	1.5	1.9	0.6	0.7	0.7	0.8	0.5	0.9	0.97
	12	20	354	0.6	1.5	1.6	0.9	1	0.7	0.9	1.1	0.7	1.1	1.01
	12	21	355	0.6	1.2	1.6	0.7	0.9	0.7	0.7	0.8	0.6	1	0.88
	12	22	356	1	0.9	1	1	0.6	0.7	0.5	0.7	0.5	0.8	0.77
	12	23	357	0.6	1.1	0.9	0.6	0.6	0.7	0.6	0.9	0.6	0.9	0.75
	12	24	358	0.5	1	0.8	0.5	0.7	0.7	0.6	0.7	0.6	0.8	0.69
	12	25	359	0.7	1.3	0.9	0.7	0.7	0.7	0.7	1.1	0.6	1.2	0.86
	12	26	360	0.8	1.6	1.1	0.8	0.8	0.6	0.6	1.1	0.6	1.4	0.94
	12	27	361	0.5	0.9	1.1	0.5	0.8	0.7	0.6	0.7	0.6	0.8	0.72
	12	28	362	0.7	0.9	1.2	0.7	0.8	0.7	0.7	0.8	0.6	0.7	0.78
	12	29	363	0.9	0.9	0.9	0.9	0.7	0.6	0.6	0.6	0.6	0.7	0.74
	12	30	364	0.8	0.7	1.6	0.8	0.9	0.5	1	0.6	0.5	0.6	0.8
	12	31	365	0.7	0.7	1.2	0.7	0.8	0.6	0.6	0.5	0.6	0.6	0.7

## Sheet: Sayfa1
																		Monthly Average
							ETo-PM													ETo-PM
		month	day	DOY	2008	2009	2010	2011	2012	2013	2014	2015	2016	2017	Ave.			2008	2009	2010	2011	2012	2013	2014	2015	2016	2017	AVE.	Std. Error
		#	#
		1	1	1	0.7	0.5	0.9	0.6	0.6	0.6	0.7	0.6	0.4	0.6	0.62		Jan	0.790323	0.845161	0.929032	0.874194	0.790323	0.887097	0.954839	0.877419	0.825806	0.948387	0.872258	0.0173226	0.173226
		1	2	2	0.7	0.5	1	0.8	0.5	0.7	0.6	0.6	0.5	0.7	0.66		Feb	1.29032	1.04839	1.11613	1.4871	1.46129	1.54839	1.92258	1.44516	1.71613	1.6129	1.46484	0.0762525	0.762525
		1	3	3	1.1	0.5	0.9	0.6	1	1.2	0.8	0.9	0.6	0.9	0.85		Mar	2.62903	2.04516	2.36452	2.82258	2.22581	2.49677	3.03226	2.39032	2.49677	2.92903	2.54323	0.0903623	0.903623
		1	4	4	1.1	0.6	1.2	1.2	1.3	0.7	0.5	0.7	0.5	0.6	0.84		Apr	3.86774	3.32903	3.49032	4.29355	3.97097	4.02903	4.69355	3.68387	4.17419	4.44516	3.99774	0.122653	1.22653
		1	5	5	0.7	0.5	0.6	0.7	1.3	0.5	0.5	0.7	0.4	0.6	0.65		May	5.03548	4.7129	5.02581	5.13871	5.13226	5.17097	5.84194	5.29677	5.12258	5.56452	5.20419	0.0894426	0.894426
		1	6	6	0.5	0.9	0.9	0.7	0.8	0.7	0.8	1	0.5	1	0.78		Jun	6.46774	5.93871	6.05806	6.26774	6.90968	6.70968	6.3	6.60968	6.74194	6.50645	6.45097	0.0894272	0.894272
		1	7	7	0.8	0.6	0.7	0.7	0.6	0.6	0.8	0.6	0.6	0.6	0.66		Jul	6.59032	6.5	6.30323	6.09677	7.00645	7.05484	6.10323	7.12903	7.11935	6.74516	6.66484	0.117808	1.17808
		1	8	8	0.7	0.9	1.3	0.7	0.7	0.6	1.3	0.6	0.7	0.8	0.83		Aug	5.46129	5.55806	5.63226	3.62903	6.27097	5.9129	4.86452	5.86452	5.9129	4.65806	5.37645	0.226715	2.26715
		1	9	9	1	0.8	1.3	0.7	0.8	0.4	1.1	0.5	0.7	0.7	0.8		Sep	3.57419	4.04839	4.14194	2.47097	4.4129	4.39032	3.06129	4.59677	4.41935	3.3129	3.8429	0.204194	2.04194
		1	10	10	0.8	0.9	1.4	0.7	1.1	0.6	1.3	0.7	0.9	0.8	0.92		Oct	1.96452	2.44839	2.2	1.83548	2.6129	2.5129	1.97742	2.7	2.66774	2.13226	2.30516	0.0928331	0.928331
		1	11	11	0.6	0.8	1	0.8	0.9	0.6	1.1	0.7	0.7	1	0.82		Nov	1.11935	1.16774	1.47419	1.04516	1.32581	1.35806	1.16129	1.35806	1.33226	1.23226	1.25742	0.0384369	0.384369
		1	12	12	0.6	0.8	1	0.7	0.8	0.6	1	0.6	0.8	0.9	0.78		Dec	0.845161	0.929032	1.09355	0.880645	0.803226	0.635484	0.732258	0.767742	0.635484	0.854839	0.817742	0.0397904	0.397904
		1	13	13	0.6	0.7	0.6	0.6	0.7	0.6	0.7	0.7	0.7	0.7	0.66		Std. Error	0.629416	0.60512	0.593288	0.574987	0.680668	0.662836	0.603403	0.662169	0.663945	0.618014	0.621632
		1	14	14	0.6	0.9	0.7	0.7	0.6	0.7	0.6	0.7	0.7	0.8	0.7			Monthly Total		ETo-PM
		1	15	15	0.6	1.3	0.6	0.7	0.6	1	0.8	0.5	1	1	0.81			2008	2009	2010	2011	2012	2013	2014	2015	2016	2017	AVE.	Std. Error
		1	16	16	0.8	1.3	0.8	1	0.7	1.1	0.6	0.7	1.1	0.9	0.9
		1	17	17	0.8	1.3	0.9	1	0.7	1.1	0.7	0.7	1	1.1	0.93		Jan	24.5	26.7	26.7	27.1	24.5	27.5	29.6	27.2	25.6	29.4	26.88	0.502917
		1	18	18	0.8	1.2	0.9	0.8	0.7	1.1	0.9	0.8	1.1	1.1	0.94		Feb	40	32.5	34.6	46.1	45.3	48	59.6	44.8	53.2	50	45.41	2.36383
		1	19	19	0.8	0.7	0.5	0.6	0.6	0.9	0.9	1	0.8	0.9	0.77		Mar	81.5	63.4	73.3	87.5	69	77.4	94	74.1	77.4	90.8	78.84	2.80123
		1	20	20	0.8	0.8	0.5	1	0.6	0.9	0.9	1	0.8	1	0.83		Apr	119.9	103.2	108.2	133.1	123.1	124.9	145.5	114.2	129.4	137.8	123.93	3.80224
		1	21	21	0.8	0.8	0.7	0.9	0.7	0.9	1	1.1	0.9	1.3	0.91		May	156.1	146.1	155.8	159.3	159.1	160.3	181.1	164.2	158.8	172.5	161.33	2.77272
		1	22	22	0.9	1.8	0.9	0.9	0.7	1.5	1	1.5	1.2	1.7	1.21		Jun	200.5	184.1	187.8	194.3	214.2	208	195.3	204.9	209	201.7	199.98	2.77224
		1	23	23	0.9	1	0.9	0.9	0.8	1.2	1.1	1.2	1.1	1.2	1.03		Jul	204.3	201.5	195.4	189	217.2	218.7	189.2	221	220.7	209.1	206.61	3.65205
		1	24	24	0.8	0.9	0.6	0.8	0.8	1.6	0.9	1.8	1.4	2	1.16		Aug	169.3	172.3	174.6	112.5	194.4	183.3	150.8	181.8	183.3	144.4	166.67	7.02817
		1	25	25	0.8	0.7	0.9	1.1	0.5	0.9	1.1	1.1	0.7	1.1	0.89		Sep	110.8	125.5	128.4	76.6	136.8	136.1	94.9	142.5	137	102.7	119.13	6.33
		1	26	26	1	0.8	0.7	1	0.5	0.9	1.1	1.2	0.7	1	0.89		Oct	60.9	75.9	68.2	56.9	81	77.9	61.3	83.7	82.7	66.1	71.46	2.87783
		1	27	27	0.6	1	0.9	0.8	0.8	0.9	0.9	1	0.7	0.7	0.83		Nov	34.7	36.2	45.7	32.4	41.1	42.1	36	42.1	41.3	38.2	38.98	1.19154
		1	28	28	0.9	0.6	0.5	1.2	1.2	1.1	1.5	1.1	0.9	1	1		Dec	26.2	28.8	33.9	27.3	24.9	19.7	22.7	23.8	19.7	26.5	25.35	1.2335
		1	29	29	0.8	1	1.1	1.6	1.2	1.3	1.2	1.1	1.1	0.9	1.13		Std.Error	19.5119	18.7439	18.4567	17.8246	21.1007	20.5479	18.7055	20.5272	20.5823	19.1584	19.2755
		1	30	30	1	0.5	0.5	1.2	0.9	1.1	1.5	1	1.3	0.9	0.99		Total	1228.7	1196.2	1232.6	1142.1	1330.6	1323.9	1260	1324.3	1338.1	1269.2	1264.57
		1	31	31	0.9	1.1	1.3	1.4	0.8	0.9	1.7	0.8	1.1	0.9	1.09
		2	1	32	1	1	0.9	1.2	1	1.2	1.4	1.4	1.3	1.1	1.15		Average	0.790323	0.845161	0.929032	0.874194	0.790323	0.887097	0.954839	0.877419	0.825806	0.948387
		2	2	33	1	0.8	0.8	0.7	1.1	1.2	1.1	1.3	1.2	0.9	1.01		Total	24.5	26.7	26.7	27.1	24.5	27.5	29.6	27.2	25.6	29.4
		2	3	34	1.1	1	0.5	1	1.2	1.3	1.3	1.6	1.5	1.4	1.19		Std. Dv.	0.153525	0.297408	0.259072	0.247612	0.22709	0.2941	0.297589	0.297444	0.262002	0.303173
		2	4	35	1.1	0.8	0.9	0.9	1.2	1.7	1.1	1.5	1.7	1.3	1.22		Std. Error	0.0275739	0.0534161	0.0465307	0.0444725	0.0407866	0.0528219	0.0534485	0.0534226	0.047057	0.0544515
		2	5	36	1.1	1	0.9	1.2	1	1.1	1.3	1	1.1	1.4	1.11
		2	6	37	1.2	1.1	0.9	1	1.2	1.1	1.5	1.3	1.1	1.3	1.17
		2	7	38	0.7	1.2	1.2	1	0.9	1	1.5	1.3	1	1.1	1.09
		2	8	39	1.2	1.3	0.9	1.8	1.1	1.4	1.7	1.6	1.4	1.9	1.43
		2	9	40	1.5	1.4	0.7	1.6	1	2	1.6	1.3	1.7	1.3	1.41
		2	10	41	1.3	1.1	1	1.1	1.4	1.6	1.7	1.4	1.5	1.3	1.34
		2	11	42	1.2	1.7	1.2	1.3	1.5	1.3	2.3	1.6	1.6	1.6	1.53
		2	12	43	1.3	1.1	1.1	1.2	1.1	1.2	1.6	1.1	1.5	1.2	1.24
		2	13	44	1.1	0.9	1.1	0.9	1.4	1.4	1.7	1.2	1.5	1.2	1.24
		2	14	45	1.3	1.4	1.3	0.9	1.4	1.2	1.7	1.1	1.2	1.1	1.26
		2	15	46	0.9	0.8	0.6	1.3	1.9	1.8	1.8	1.5	1.9	1.5	1.4
		2	16	47	0.7	0.8	1.2	1.5	1.8	1.7	1.6	1.5	2.2	1.4	1.44
		2	17	48	0.8	1.2	1.3	1.6	1.5	1.7	2.2	1.5	2.2	1.5	1.55
		2	18	49	1.1	1.1	1.6	1.9	1.4	1.6	2.5	1.7	2.6	1.8	1.73
		2	19	50	1.3	1.3	1.6	1.8	1.4	1.8	2.3	1.7	2.5	2.1	1.78
		2	20	51	1.5	1	1.7	1.2	1.4	1.7	1.6	1.4	2.6	1.8	1.59
		2	21	52	1.9	0.7	1.2	2.1	1.7	1.8	2.5	1.4	2	2.2	1.75
		2	22	53	1.8	1.3	1.9	2.1	2	1.8	3.3	1.7	2	2.2	2.01
		2	23	54	1.5	0.9	1.5	2.2	1.9	2	2.8	1.9	1.9	2.3	1.89
		2	24	55	1.5	0.8	1.7	2.1	2	1.7	3.1	1.6	1.8	2.1	1.84
		2	25	56	2.3	0.9	0.9	2.2	2.1	2.2	2.5	1.7	2.1	2.2	1.91
		2	26	57	2.1	1	0.8	2.2	3.1	2.1	3.2	1.9	2.2	2.5	2.11
		2	27	58	1.8	1.3	1.6	1.9	1.9	2.2	2	2.1	2.2	2.6	1.96
		2	28	59	2	1	0.7	2	1.8	1.9	2.3	1.6	2.2	3	1.85
		3	1	60	2	1.1	1.8	2.4	1.3	1.9	2.6	2.1	1.3	3.4	1.99		Average	1.29032	1.04839	1.11613	1.4871	1.46129	1.54839	1.92258	1.44516	1.71613	1.6129
		3	2	61	1.9	1.8	1.8	2.6	1.1	1.5	2.5	1.6	2	2.5	1.93		Total	40	32.5	34.6	46.1	45.3	48	59.6	44.8	53.2	50
		3	3	62	1.4	1.4	1	1.5	0.7	1.2	1.7	1.1	1.6	1.4	1.3		Std. Dv.	0.415816	0.244773	0.37157	0.46529	0.480748	0.369568	0.61466	0.291935	0.481038	0.563762
		3	4	63	2.2	0.8	1.8	2.1	1.5	2.4	2.5	2.1	2.5	2.3	2.02		Std. Error	0.0785819	0.0462578	0.0702202	0.0879315	0.0908528	0.0698418	0.11616	0.0551705	0.0909077	0.106541
		3	5	64	2.2	1.2	0.8	2	1.7	2.2	2.2	2.4	2.7	2.4	1.98
		3	6	65	2.4	1.2	1.3	2.7	1.8	1.9	2.3	2.2	2.4	2.2	2.04
		3	7	66	2.4	2.2	1.9	2	1.7	2.5	2.3	2.7	2.3	2.6	2.26
		3	8	67	3	1.5	1.7	2.7	1.7	2.1	3.2	2.5	2.4	3	2.38
		3	9	68	2.3	2.9	2.1	2.6	2.3	3.1	3.8	3.8	3.2	4	3.01
		3	10	69	1.6	2.7	2.5	2.4	1.6	2.4	3.2	2.9	2.6	4.1	2.6
		3	11	70	2.8	1.5	2.1	2.6	1.6	1.8	3.2	1.8	1.7	3.4	2.25
		3	12	71	2.3	2.7	2.7	2.7	1.9	2.1	3.2	2	1.9	3.5	2.5
		3	13	72	2	1.7	1.9	2.6	1.7	2.2	2.8	1.7	2	2.9	2.15
		3	14	73	1.4	1.6	1.6	2.3	2.3	2.4	2.3	2.1	2.4	2.6	2.1
		3	15	74	2.5	1.1	2.2	2.6	1.9	2.2	2.6	2	1.9	2.3	2.13
		3	16	75	2.5	2.1	2.2	3.8	1.8	2.5	3	1.9	1.9	2.9	2.46
		3	17	76	2.6	2.5	2.6	3.6	1.1	1.5	2.5	1.2	1.2	2.3	2.11
		3	18	77	3.3	1.9	2.1	3.3	2	2.4	2.5	2.5	2.4	2.2	2.46
		3	19	78	2.8	2.3	2.3	3.4	2.3	3.1	3.2	2.9	3.4	2.8	2.85
		3	20	79	2.5	1.8	2.4	2.7	2.9	3.2	3.3	2.7	2.8	2.9	2.72
		3	21	80	2.9	2.9	3	3.3	3	3.2	3.3	2.4	2.8	3	2.98
		3	22	81	4.1	3.1	3.7	2	3.5	2.8	3.2	1.9	2.4	1.4	2.81
		3	23	82	4	1.4	3.6	2.2	3.6	3.1	2.9	3.1	3.5	2.3	2.97
		3	24	83	3.8	2.1	3.5	2.7	3.9	3.3	4.2	3	4.1	3.8	3.44
		3	25	84	3.3	2.6	3.2	2.8	3.8	3.2	3.8	3	3.7	3	3.24
		3	26	85	3.1	2.1	3.2	3.2	3.7	3.1	3.7	3.2	3.4	3.4	3.21
		3	27	86	3	2	3.4	3.4	3.1	2.8	3.4	3	3	3.2	3.03
		3	28	87	2.8	1.6	2.4	3.7	2.5	2.5	4.2	2.6	2.6	3.9	2.88
		3	29	88	2.2	2.9	2.3	4.2	2.8	3.4	4.2	3	3	4	3.2
		3	30	89	3.5	3.3	2.8	3.7	2.1	2.9	2.9	2.5	2.2	3.7	2.96
		3	31	90	2.7	3.4	3.4	3.7	2.1	2.5	3.3	2.2	2.1	3.4	2.88
		4	1	91	3.6	2.9	2.3	3.5	2.5	3.9	3.8	2.6	3.3	3	3.14		Average	2.62903	2.04516	2.36452	2.82258	2.22581	2.49677	3.03226	2.39032	2.49677	2.92903
		4	2	92	3.3	3.5	3.4	4.8	2.9	3.7	4.3	2.8	3.4	4	3.61		Total	81.5	63.4	73.3	87.5	69	77.4	94	74.1	77.4	90.8
		4	3	93	3.3	3.4	4.1	4	4.4	4.7	4.1	3.8	4.7	3.3	3.98		Std. Dv.	0.684687	0.707973	0.7539	0.649979	0.856336	0.583943	0.63002	0.607374	0.691609	0.713766
		4	4	94	3.2	3	3.8	4	4.1	4.7	4.5	3.9	4.7	4.3	4.02		Std. Error	0.122973	0.127156	0.135404	0.11674	0.153803	0.104879	0.113155	0.109088	0.124217	0.128196
		4	5	95	3.6	3.4	3.8	4	4	4	4.3	3.6	4.1	4.1	3.89
		4	6	96	3	2.5	3.9	4.3	4	4.3	4.8	3.7	4.1	4.5	3.91
		4	7	97	1.5	3.3	3.5	3.9	4.9	4.5	5.4	4	4.2	4.3	3.95
		4	8	98	3.6	2.8	2.5	4.2	2.8	3.2	4.7	2.7	3	4.1	3.36
		4	9	99	2.7	3.4	2.8	4.1	3.5	3.2	4.3	3.5	3.5	3.7	3.47
		4	10	100	3.6	3.5	2.9	4.2	4.3	3.8	4.4	3.7	4.5	3.9	3.88
		4	11	101	3.6	3.8	1.4	3.6	4.2	3.9	4.2	3.7	4.6	4	3.7
		4	12	102	4.5	3	3.4	3.2	3.6	3	4.8	2.4	2.9	4.1	3.49
		4	13	103	4.3	3.6	3.6	3.4	2.2	2.6	4.2	1.8	2.1	4	3.18
		4	14	104	4.1	3	4	3.7	3.6	3.8	4.4	2.7	3.1	4.2	3.66
		4	15	105	4.2	2.6	4	4.4	3.5	4.1	4.1	3.5	3.6	4.7	3.87
		4	16	106	3.9	3.2	3.8	4.8	3.5	3.9	4.2	3.8	3.8	4.9	3.98
		4	17	107	3.6	2.7	3.6	4.7	3.9	3.8	4.7	4.5	4.9	4.8	4.12
		4	18	108	3.4	1.9	3.8	5	4	3.6	5.1	4.1	4.4	4.2	3.95
		4	19	109	4.2	3.8	4.4	5.4	4.6	4.2	5.4	4.8	5.3	4.6	4.67
		4	20	110	4.6	3.3	3.8	4.5	4.2	4.3	4.6	4.8	5.7	5	4.48
		4	21	111	4.9	3.3	2.9	4.3	3.9	3.6	4.9	4	4.6	4.8	4.12
		4	22	112	4.2	3.6	3.7	4.5	4.5	3.9	4.9	3.7	4.7	4.9	4.26
		4	23	113	5.7	4.2	4	4.1	4.7	3.9	5.4	3.6	4.2	4.8	4.46
		4	24	114	4.9	3.8	4	5.3	4.4	4.6	4.8	3.6	5.1	4.4	4.49
		4	25	115	4.4	3.3	5	4.2	5.6	4.7	5.6	4.2	5.3	4.6	4.69
		4	26	116	4	3.9	4.2	4.5	5.4	5.3	5.9	4.6	5.9	5.2	4.89
		4	27	117	4.8	3.4	2.3	4.7	4.4	4.7	5	4.3	4.5	5.4	4.35
		4	28	118	4.3	3.4	2.6	4.7	3.9	4	5.7	3.8	3.8	5.6	4.18
		4	29	119	4.2	4.1	4.1	4.5	4.9	5.2	4.9	4.9	4.7	5.4	4.69
		4	30	120	4	4.2	3.2	4.9	4.6	5.3	4.8	4.9	4.6	5.6	4.61
		5	1	121	5	4.1	3.6	4.7	3.4	4.1	5	3.7	3.6	5.8	4.3		Average	3.86774	3.32903	3.49032	4.29355	3.97097	4.02903	4.69355	3.68387	4.17419	4.44516
		5	2	122	5	4.6	4.1	4.7	2.9	3.7	4.8	3.2	2.9	5.1	4.1		Total	119.9	103.2	108.2	133.1	123.1	124.9	145.5	114.2	129.4	137.8
		5	3	123	5.5	4.8	5.3	4.7	3.5	4.9	5.4	3.9	4	4.5	4.65		Std. Dv.	0.802241	0.510028	0.738627	0.535995	0.838329	0.699139	0.579618	0.805025	0.937005	0.651582
		5	4	124	5	2.4	4.7	5.1	4.2	5.4	6.1	4.7	4.9	5.1	4.76		Std. Error	0.146469	0.093118	0.134854	0.0978588	0.153057	0.127645	0.105823	0.146977	0.171073	0.118962
		5	5	125	4.5	2.9	5.1	5.1	4.6	5.4	7.4	5.6	4.8	5.4	5.08
		5	6	126	4.2	3.6	4.8	4.8	4.8	5.7	6.2	5.2	4.7	5.5	4.95
		5	7	127	3.2	3.3	4.9	4.9	4.7	5.1	5.6	4.9	4.4	5.1	4.61
		5	8	128	3.3	4.3	4.9	4.9	4.5	5.2	5.7	5.3	4.4	5.1	4.76
		5	9	129	4.3	3.7	3.3	4.7	4.3	5.1	5	4.8	4.9	5.9	4.6
		5	10	130	3.8	4	5.1	5.3	5.6	5	5.6	5.6	5	5.8	5.08
		5	11	131	4.5	4	4.9	5.5	5.2	4.7	5.3	6	5.5	5.5	5.11
		5	12	132	4.7	4.4	5.3	4.4	6	4.6	5.5	5.1	5.6	5.5	5.11
		5	13	133	4.8	4.8	5.6	4.4	6.4	4.5	5.8	5.1	5.5	6	5.29
		5	14	134	2.3	5.5	5.5	4.7	5.2	4.4	5.4	5.3	6.2	7.1	5.16
		5	15	135	4.5	5.3	4.7	4.9	5.2	4.9	5.3	5.6	6.2	6.3	5.29
		5	16	136	5.2	5.5	5	4.9	5.5	5.1	5.8	5.8	6.4	5.5	5.47
		5	17	137	4.4	5.3	5.5	5.1	5.4	5.3	5.6	6	5.9	5.4	5.39
		5	18	138	5.9	5.5	5.2	5.3	5.3	4.6	6.3	4.9	4.9	5.7	5.36
		5	19	139	5.7	5.6	5	4.9	5.2	4.6	5.7	5.2	4.8	5.7	5.24
		5	20	140	5.8	3.6	5.1	5.1	3.9	3.4	5.9	4	3.5	5.2	4.55
		5	21	141	5.7	3.7	5.2	5.2	6.1	5.4	5.9	6.3	5.5	5	5.4
		5	22	142	6.4	5.2	4.9	5.2	4.6	4.7	5.6	4.9	4.8	5.1	5.14
		5	23	143	6	5.4	4.7	5.7	4.1	4.9	5.6	4.5	4.8	4.6	5.03
		5	24	144	5.1	5.2	4.7	5.1	6	6.6	5.4	6.2	5.9	5	5.52
		5	25	145	3.8	6.5	5.3	5.4	5.3	5.8	5.8	6.5	5.6	6.2	5.62
		5	26	146	5.8	5.6	5.3	5.9	4.7	5.5	5.6	5.6	5.2	5.8	5.5
		5	27	147	6.9	4.9	5.1	6.1	5.6	6.2	5.8	6.2	5.7	5.6	5.81
		5	28	148	6.2	5.2	4.3	5.4	6.5	6	6.7	6.1	5.7	5.5	5.76
		5	29	149	6	5.6	6	5.5	7.1	6.6	7.5	6.3	6.2	6.6	6.34
		5	30	150	6.1	5.7	6.4	5.8	6.8	6.3	7	5.8	5.5	6	6.14
		5	31	151	6.5	5.9	6.3	5.9	6.5	6.6	6.8	5.9	5.8	5.9	6.21
		6	1	152	6	5.9	6.1	6.3	6.1	6.5	6	6.4	6.2	5.8	6.13		Average	5.03548	4.7129	5.02581	5.13871	5.13226	5.17097	5.84194	5.29677	5.12258	5.56452
		6	2	153	5.9	5.9	6	5.7	6.2	6.2	5.8	6	6.2	5.6	5.95		Total	156.1	146.1	155.8	159.3	159.1	160.3	181.1	164.2	158.8	172.5
		6	3	154	6.3	5.7	6	5.7	6.2	6.3	5.7	6.3	6.2	6	6.04		Std. Dv.	1.07193	0.975617	0.647028	0.437933	1.02319	0.801745	0.652571	0.823603	0.845265	0.5529
		6	4	155	7.5	5.3	5.7	6.1	6.2	5.9	5.8	5.7	6	6.1	6.03		Std. Error	0.192524	0.175226	0.11621	0.078655	0.183771	0.143998	0.117205	0.147924	0.151814	0.0993039
		6	5	156	6	5.8	6	5.9	6.7	6	5.6	6.3	6.2	6.5	6.1
		6	6	157	5.1	5.8	7.2	6.2	8	6.7	6.3	6.6	7.1	7.2	6.62
		6	7	158	5.4	4.9	5.7	6.5	6.5	5.7	5.5	5.9	6	5.7	5.78
		6	8	159	5.3	4.9	4.6	6.8	5.7	5.7	5.4	5.9	5.9	6	5.62
		6	9	160	5.5	4.8	5.3	6.5	5.5	5.8	5.6	5.9	5.9	6.4	5.72
		6	10	161	5.6	6.3	5	6.7	5.9	6.3	5.8	6.4	6.2	6.7	6.09
		6	11	162	5.6	5.1	5.1	5.9	6.8	6.9	6.2	6.9	6.9	7.2	6.26
		6	12	163	6.1	6.3	6.2	6	8.4	7.6	6.9	7.2	7.3	7.4	6.94
		6	13	164	5.9	4.8	6.4	5.9	8.1	6.9	6.7	6.8	6.7	7	6.52
		6	14	165	6	5.9	6.4	5.4	6.1	5.3	6.4	5.4	5.4	5.9	5.82
		6	15	166	6.1	5.4	5.9	5.5	6.6	6.1	5.9	6.4	6.5	5.8	6.02
		6	16	167	7.4	6	6	6.2	7	6.9	6	6.9	7.1	6.6	6.61
		6	17	168	8.7	4.8	5.8	6.8	7.3	7	6.3	6.9	6.7	6.4	6.67
		6	18	169	7.3	5.7	7.1	6.4	8.3	6.4	7.5	6.5	6.3	6	6.75
		6	19	170	7.2	6.7	7.6	7.4	8.8	7.1	8.6	7.1	7.2	6.9	7.46
		6	20	171	6.3	7	6.8	7	7.6	7.5	7.1	7.3	7.7	6.7	7.1
		6	21	172	6	6.7	6.2	6.9	6.7	6.6	6.6	6.5	6.9	6.7	6.58
		6	22	173	6.2	8	6.1	6.9	6.8	8.3	5.8	8.4	8.6	7.2	7.23
		6	23	174	5.8	6.2	5.7	5.6	6.6	7.5	5.8	7.5	7.7	6.6	6.5
		6	24	175	6.3	4.3	4.7	6.3	6.5	5.9	6.1	6	6.3	5.7	5.81
		6	25	176	7.2	6.7	5.4	5.8	6.2	7.2	5.1	7.1	7.5	6.3	6.45
		6	26	177	7.9	7.7	5.6	7.2	6.4	8.6	5.9	7.8	8.4	8.3	7.38
		6	27	178	8.6	6.5	6.2	6.7	7.2	7.5	6.6	7.1	7.4	7.1	7.09
		6	28	179	7	6.2	7	5.8	8	7	7.2	6.6	7.1	6.6	6.85
		6	29	180	7	5.9	7.6	6.5	8.5	6.4	7.9	6.1	6.2	6	6.81
		6	30	181	6.8	7	6.1	5.8	6.8	7.6	6.4	7.1	7.4	7.4	6.84
		7	1	182	6.1	7.2	6.9	6.6	7	7.3	6.9	7.4	7.4	7.4	7.02		Average	6.46774	5.93871	6.05806	6.26774	6.90968	6.70968	6.3	6.60968	6.74194	6.50645
		7	2	183	7.2	7.3	5.8	6.6	6.4	7.2	6.4	7.5	7.4	7.5	6.93		Total	200.5	184.1	187.8	194.3	214.2	208	195.3	204.9	209	201.7
		7	3	184	7.2	8	6.1	6.8	5.7	8.1	5.7	8.2	8.3	8.7	7.28		Std. Dv.	0.915928	0.863202	0.745106	0.527502	0.887827	0.777327	0.768982	0.661994	0.771481	0.639237
		7	4	185	6.5	7.7	6.8	6.7	6.9	8.4	6.8	8.4	8.5	8.4	7.51		Std. Error	0.167225	0.157598	0.136037	0.0963082	0.162094	0.14192	0.140396	0.120863	0.140852	0.116708
		7	5	186	5.7	6.2	7	5.7	7	7.8	6.9	7.7	7.9	7.8	6.97
		7	6	187	6.2	7.4	6.4	6	6.3	8.3	6.1	8.2	8.3	8.4	7.16
		7	7	188	6.5	6.8	5.8	6.6	6	7.6	5.5	7.6	7.8	7.1	6.73
		7	8	189	6.5	5.5	5.8	7.9	6.6	6.3	5.9	6.4	6.4	5.7	6.3
		7	9	190	6.2	7.3	6.8	6.2	7	7.5	6.1	7.3	7.5	6.7	6.86
		7	10	191	6.3	8.3	6.2	5.9	6.9	8.8	6.4	8.7	8.6	8.8	7.49
		7	11	192	6.2	7.7	6	7.1	6.6	8.2	5.9	8	8	8	7.17
		7	12	193	6.6	7.1	6.1	7.1	6.6	7.5	5.8	7.7	7.3	7.3	6.91
		7	13	194	6.5	7	5.9	6.2	6.6	7.5	5.5	7.5	7.3	7.2	6.72
		7	14	195	6	5.8	6.3	6.2	7.3	7.1	6.3	7	7.1	6.8	6.59
		7	15	196	5.9	4.8	6.3	7.2	7.4	7.4	6.6	7.4	7.4	7.3	6.77
		7	16	197	6.2	5.7	6.2	7.7	7.1	6.3	6.1	6.5	6.2	6	6.4
		7	17	198	6	5.9	5.4	7.5	6.4	6.4	5.3	6.7	6.6	6.1	6.23
		7	18	199	6.2	5.6	5.2	6.7	6.6	6.6	5.1	6.8	6.8	6.4	6.2
		7	19	200	7.4	5.9	5.6	5.9	6.5	6.7	5.4	6.9	6.8	6.4	6.35
		7	20	201	8.8	6.7	5.8	5.2	6.4	6.9	5.2	6.9	6.8	6.4	6.51
		7	21	202	7.1	6.8	5.7	4.9	6	6.9	4.6	7	7	6.2	6.22
		7	22	203	7.9	6.5	5.6	4.8	6.7	6.8	4.5	6.8	6.6	5.6	6.18
		7	23	204	6.4	5.8	7.5	6.1	8.4	6.5	7.2	6.7	6.6	6	6.72
		7	24	205	7.3	6.2	7.9	4.9	9.6	7	7.8	7.1	7.2	6.2	7.12
		7	25	206	6.5	6	6.5	5.3	7.9	6.7	6.6	6.7	6.8	6	6.5
		7	26	207	5.8	5.9	7	5	8.3	6.2	7	6.3	6.2	5.6	6.33
		7	27	208	6.1	6.8	6.1	5.1	6.8	6.9	5.7	7	7	6.9	6.44
		7	28	209	6.4	6	6.6	6.1	7.3	5.9	6.5	6.1	6.2	5.6	6.27
		7	29	210	6.5	5.6	7.3	5.6	8.4	5.9	7.1	6.1	6.2	5.3	6.4
		7	30	211	6.8	6.2	6.5	4.9	7.4	6.1	6.2	6.5	6.4	5.8	6.28
		7	31	212	7.3	5.8	6.3	4.5	7.1	5.9	6.1	5.9	6.1	5.5	6.05
		8	1	213	7.1	6.6	5.9	3.1	6.2	7.1	3.9	7	7.1	5.2	5.92		Average	6.59032	6.5	6.30323	6.09677	7.00645	7.05484	6.10323	7.12903	7.11935	6.74516
		8	2	214	6.1	6.3	5.9	4.2	6.5	6.8	4.8	6.8	6.8	5.7	5.99		Total	204.3	201.5	195.4	189	217.2	218.7	189.2	221	220.7	209.1
		8	3	215	5.9	5.1	5.9	6.2	7	6	6.1	6	6	5.4	5.96		Std. Dv.	0.667011	0.843406	0.626357	0.925377	0.81973	0.786909	0.76441	0.707669	0.727745	1.01286
		8	4	216	5.7	5.5	6.1	6.1	6.4	5.5	5.6	5.6	5.6	4.9	5.7		Std. Error	0.119799	0.15148	0.112497	0.166203	0.147228	0.141333	0.137292	0.127101	0.130707	0.181916
		8	5	217	6.3	5.4	5.9	5.4	6.9	5.4	6	5.6	5.5	4.7	5.71
		8	6	218	5.5	5.9	6.1	5.4	7.8	5.9	6.3	5.9	5.9	5.4	6.01
		8	7	219	5.7	5.5	6.5	5.6	7.9	7.3	6.7	7.3	7.1	6.9	6.65
		8	8	220	6.2	5.9	6.2	4.9	7.4	7.3	6.4	7.2	7	7.2	6.57
		8	9	221	6.8	6.2	6.2	5.2	6.6	6.9	5.8	6.7	6.9	6.9	6.42
		8	10	222	6.3	5.9	5.6	4.9	6.2	6.6	5.3	6.4	6.6	6.1	5.99
		8	11	223	6	6.4	6.3	4.9	7.2	7.1	6.1	7	7.2	6.4	6.46
		8	12	224	6	5.3	5.8	4.5	6.4	5.7	5.4	5.6	5.7	4.9	5.53
		8	13	225	5.4	4.9	5.3	2.1	5.9	4.8	3.6	4.8	4.7	2.5	4.4
		8	14	226	5.5	5.4	6.1	4.5	6.8	5.6	6.1	5.5	5.5	4.9	5.59
		8	15	227	5.5	5.3	6.3	4.1	7.1	5.1	6.3	5.1	5	4.4	5.42
		8	16	228	5.5	5.5	5.7	3.7	6.4	5.1	5.4	5.1	5.2	4	5.16
		8	17	229	5	5.8	5.9	4.7	6.5	5.3	6	5.4	5.5	4.7	5.48
		8	18	230	5	5.5	5.8	2.1	6.8	5.7	4.3	5.7	5.6	3.2	4.97
		8	19	231	3.6	5.5	5.1	2.4	5.7	5.5	3.6	5.4	5.3	3.3	4.54
		8	20	232	4.7	5.5	5.2	2.4	5.7	6.3	3.9	6.3	6.3	4.6	5.09
		8	21	233	5.3	6	5.4	2.5	5.7	6.5	3.7	6.4	6.4	4.5	5.24
		8	22	234	5.4	5.9	5.5	2.3	5.9	6.3	4	6.2	6.3	3.9	5.17
		8	23	235	4.9	5.3	5.3	3.5	5.4	5.1	3.9	5.1	5.2	3.4	4.71
		8	24	236	4.6	5.4	5.4	2.5	5.9	5.5	4.1	5.6	5.7	3.8	4.85
		8	25	237	5.2	5.3	5.3	2.3	5.1	5.7	3.5	5.8	5.8	4.2	4.82
		8	26	238	5	5.3	4.9	2.8	5.8	4.9	4.8	4.7	5.1	3.8	4.71
		8	27	239	4.9	5	5.4	1.2	6.2	5	4.4	4.8	5.1	2.8	4.48
		8	28	240	5	5	5.2	1.5	5.9	5.6	4	5.4	5.6	3.4	4.66
		8	29	241	5.2	5.5	4.8	2.9	5.1	6.2	3.9	5.9	6.1	5	5.06
		8	30	242	5.2	4.9	4.8	1.9	5.1	6	3.2	5.8	5.9	4.1	4.69
		8	31	243	4.8	5.3	4.8	2.7	4.9	5.5	3.7	5.7	5.6	4.2	4.72
		9	1	244	5.6	4.8	4.8	2.6	5.1	4.6	3.8	4.7	4.6	3	4.36		Average	5.46129	5.55806	5.63226	3.62903	6.27097	5.9129	4.86452	5.86452	5.9129	4.65806
		9	2	245	5.3	5.2	5	2.3	5.1	5.3	3.5	5.5	5.3	3.7	4.62		Total	169.3	172.3	174.6	112.5	194.4	183.3	150.8	181.8	183.3	144.4
		9	3	246	5.1	5.4	5	2.9	5.2	5.5	3.9	5.6	5.6	4.4	4.86		Std. Dv.	0.69937	0.434951	0.488117	1.44895	0.776399	0.738802	1.09652	0.716263	0.695098	1.1966
		9	4	247	4.4	5.1	4.9	2.6	5.3	5.4	4	5.6	5.3	4.3	4.69		Std. Error	0.125611	0.0781196	0.0876684	0.260239	0.139445	0.132693	0.196942	0.128645	0.124843	0.214916
		9	5	248	4.5	5.5	5	1.5	5.4	5.2	3.4	5.8	5.4	4.1	4.58
		9	6	249	4.1	4.9	4.6	1.4	5.3	4.2	3	5.1	4.6	2.2	3.94
		9	7	250	4.6	4.3	4.7	4.3	5.6	4	4.7	4.5	4.4	3.5	4.46
		9	8	251	4.2	4.2	4.4	3.7	5.2	4.5	4.3	4.9	4.8	4.1	4.43
		9	9	252	3.9	4	4.4	3.1	5.1	4.2	4	4.7	4.6	3.8	4.18
		9	10	253	4	3.9	4.4	3.8	4.5	4.2	3.9	4.6	4.6	4.2	4.21
		9	11	254	4.5	4.5	4.4	1.2	4.1	5.6	2.2	5.9	5.6	4.4	4.24
		9	12	255	3.7	3.8	4.2	1.8	4.1	4.7	2.6	4.8	4.8	3.5	3.8
		9	13	256	3.2	4.3	4.7	2.9	4.9	4.9	4	4.8	4.9	3.9	4.25
		9	14	257	3.2	3.6	4.1	3.3	4.5	4.1	3.3	4.1	4	2.8	3.7
		9	15	258	3.2	3.8	4.2	2.2	3.8	3.5	2.9	3.5	3.3	2.8	3.32
		9	16	259	1.9	3.7	3.9	3	4	3.9	3	3.8	3.7	3.1	3.4
		9	17	260	3.1	3.6	4.4	3.9	4.6	3.7	3.1	3.9	3.7	2.7	3.67
		9	18	261	2.9	3.1	4.5	2.2	4.7	3.5	3.3	3.6	3.5	2.6	3.39
		9	19	262	2.4	3.5	5.2	2.5	5.1	4.6	4	4.4	4.3	3.4	3.94
		9	20	263	2.8	3.8	3.8	1.9	3.8	5	2	4.9	4.8	3.2	3.6
		9	21	264	3.1	3.1	3.7	1.9	3.5	4.1	2.1	4.4	4.4	2.8	3.31
		9	22	265	2.7	3.9	2.9	2.6	3.6	4.5	2.6	4.7	4.6	3.7	3.58
		9	23	266	3	3.7	3.5	2.1	3.9	4.3	2.5	4.6	4.4	2.7	3.47
		9	24	267	3	3.7	3.3	2.6	3.7	4.3	2.6	4.8	4.2	3.6	3.58
		9	25	268	2.9	3.8	1.7	2.2	3	3.8	2	4.1	3.6	3.1	3.02
		9	26	269	3	3.8	3.3	1.7	3.4	4	2.4	4.1	3.8	3	3.25
		9	27	270	3	3.4	3.9	2.1	4	3.6	3.1	3.7	3.4	2.9	3.31
		9	28	271	3.1	3.2	3.9	2.2	4.2	3.8	2.4	4	4	3.1	3.39
		9	29	272	3	3.3	3.2	1.9	3.4	3.8	1.1	3.9	3.7	2.1	2.94
		9	30	273	2.6	3.3	3.6	1.5	3.8	3.8	1.5	3.8	3.5	1.8	2.92
		10	1	274	2.3	2.8	3.6	2.9	3.8	3.2	3.3	3.3	2.9	2.9	3.1		Average	3.57419	4.04839	4.14194	2.47097	4.4129	4.39032	3.06129	4.59677	4.41935	3.3129
		10	2	275	2.3	2.9	2.8	2.6	3.5	2.7	3.2	3.1	2.8	2.7	2.86		Total	110.8	125.5	128.4	76.6	136.8	136.1	94.9	142.5	137	102.7
		10	3	276	2.5	3.2	2.3	2.4	3.8	3.1	3.2	3.4	3.3	2.8	3		Std. Dv.	0.921581	0.708459	0.754442	0.769932	0.72376	0.637367	0.867824	0.688227	0.695902	0.701304
		10	4	277	2.5	3.5	3	2.7	2.8	2.8	3	3.2	3.3	3.1	2.99		Std. Error	0.168257	0.129346	0.137742	0.14057	0.13214	0.116367	0.158442	0.125652	0.127054	0.12804
		10	5	278	2.6	3	2.8	1.2	3.4	2.6	1.8	3.4	3.1	1.7	2.56
		10	6	279	2.9	2.4	3	1.6	3.4	2.4	2.3	3.2	2.9	1.9	2.6
		10	7	280	2.1	2.7	2.5	2.2	3.1	2.4	2.8	2.9	3	2.3	2.6
		10	8	281	2.3	2.7	1.9	1.6	3.2	2.5	2.6	2.8	3.1	2.3	2.5
		10	9	282	2.2	2.5	2.3	1.7	2.5	2.3	2.1	2.4	2.6	2.1	2.27
		10	10	283	2.1	2.9	2.2	2.3	2.7	2.7	2.1	2.9	3	2.3	2.52
		10	11	284	2.4	2.9	2.3	1.7	2.3	2.7	1.6	2.7	2.8	2	2.34
		10	12	285	3	2.7	2	1.9	2.9	3.1	1.9	3.2	3.1	2.3	2.61
		10	13	286	1.4	2.1	1.9	1.9	2.7	2.6	2	2.9	2.8	2.1	2.24
		10	14	287	1.7	2.5	2.2	1	2.5	2.4	1.4	2.6	2.7	1.7	2.07
		10	15	288	1.9	2.7	1.4	1.6	3.2	2.9	1.8	3.1	3.2	1.8	2.36
		10	16	289	1.8	2.9	2.3	2.6	3	2.7	1.8	3.4	3.2	2.2	2.59
		10	17	290	1.8	3.8	2.5	2.7	2.8	3.5	1.5	3.7	3.3	2.2	2.78
		10	18	291	1.6	2.8	2.4	1.9	2.6	2.8	1.7	3.2	2.9	2	2.39
		10	19	292	1.7	2.9	2	1.8	2	2.4	1.2	2.6	2.3	1.4	2.03
		10	20	293	2.1	2.8	2.4	1.2	2.8	3.9	1.4	4.1	3.1	4.1	2.79
		10	21	294	1.5	2.1	1.9	1.4	2.7	2	2.1	2.5	2.5	2	2.07
		10	22	295	1.6	2.1	2.4	1.5	2.5	2.2	1.7	2.6	2.5	1.9	2.1
		10	23	296	1.6	2.2	1.8	1.2	2.9	2.3	0.9	2.2	2.5	1.4	1.9
		10	24	297	1.7	2.1	1.9	1.2	1.9	2	1	2.2	2.2	1.4	1.76
		10	25	298	1.7	2	1.9	2.1	1.6	1.8	2.2	1.7	1.9	2.4	1.93
		10	26	299	1.7	2.1	1.9	2.3	1.8	2.1	2.1	2.3	2.5	2.4	2.12
		10	27	300	1.7	1.3	2	2.3	1.9	1.8	2.1	1.9	2.2	2	1.92
		10	28	301	1.6	1.6	1.7	1.7	1.2	1.7	2	1.1	1.5	1.9	1.6
		10	29	302	1.5	1.6	1.8	1.2	1.7	2.1	1.4	1.6	1.7	1.5	1.61
		10	30	303	1.5	0.7	1.6	1	2.4	2.3	1.8	1.9	2.1	1.7	1.7
		10	31	304	1.6	1.4	1.5	1.5	1.4	1.9	1.3	1.6	1.7	1.6	1.55
		11	1	305	1.6	1.2	1.6	1.7	1.7	1.8	1.2	1.7	1.7	1.3	1.55		Average	1.96452	2.44839	2.2	1.83548	2.6129	2.5129	1.97742	2.7	2.66774	2.13226
		11	2	306	1.6	1.2	1.6	1.5	1.7	1.8	1.2	1.6	1.5	1.2	1.49		Total	60.9	75.9	68.2	56.9	81	77.9	61.3	83.7	82.7	66.1
		11	3	307	1.4	1.3	1.7	1.5	1.6	1.5	1.3	1.3	1.1	1.3	1.4		Std. Dv.	0.434778	0.664264	0.483735	0.548664	0.677614	0.507768	0.63019	0.690893	0.509501	0.566502
		11	4	308	1	1.6	1.7	1.3	1.8	2.6	1.2	2.2	1.7	1.6	1.67		Std. Error	0.0780885	0.119305	0.0868815	0.098543	0.121703	0.0911978	0.113186	0.124088	0.0915091	0.101747
		11	5	309	1.2	1	1.8	0.9	1.8	1.4	1.4	1.9	1.7	1.7	1.48
		11	6	310	1.2	1.8	1.8	1.1	1.8	1.8	1.5	1.9	1.8	1.6	1.63
		11	7	311	1.2	1.8	1.6	1	1.8	1.8	1.4	2.1	2	1.5	1.62
		11	8	312	1.2	1.5	1.4	0.9	1.6	1.5	1.2	1.9	1.9	1.7	1.48
		11	9	313	1.1	1.4	1.5	1.1	1.6	1.3	1.4	1.4	1.6	1.5	1.39
		11	10	314	0.9	1.5	2.1	0.9	1.9	1.4	1.9	1.4	1.6	1.3	1.49
		11	11	315	1	1.4	1.9	1.2	1.8	1.4	1.9	1.4	1.4	1.3	1.47
		11	12	316	1	1.4	1.8	1.3	1.3	1.5	1.5	1.5	1.5	1.4	1.42
		11	13	317	0.9	0.9	1.6	0.8	1.4	1.3	1.4	1.3	1.4	1.2	1.22
		11	14	318	1.1	1.2	1.4	0.9	1.2	1.4	1.1	1.4	1.4	1.4	1.25
		11	15	319	1.1	1.2	1.5	1	1.4	1.4	1.2	1.4	1.6	1.5	1.33
		11	16	320	1	1	1.2	0.7	1.2	1.5	1	1.2	1.6	1.5	1.19
		11	17	321	1.3	0.8	1.2	0.7	1.2	1.2	0.7	1.1	1.2	1.1	1.05
		11	18	322	1.1	1.1	1.4	1	1.1	1.2	1.5	1.1	1.1	1.4	1.2
		11	19	323	0.9	1	1.4	1.1	0.9	1.4	1.4	1.2	1.2	1.4	1.19
		11	20	324	0.9	1.1	1.3	1.1	0.9	1.3	1.2	1.3	1	1.2	1.13
		11	21	325	1.2	1.4	1.3	1.2	1.1	1.5	1.1	1.5	1.5	1.4	1.32
		11	22	326	1.5	1.4	1.3	1	1.2	1.3	0.7	1.4	1.3	1	1.21
		11	23	327	0.9	1.1	1.1	1.1	0.9	1.1	0.8	1.2	0.9	0.8	0.99
		11	24	328	1.1	0.8	1.6	0.8	1.1	1	0.9	1.2	1	0.8	1.03
		11	25	329	1	0.9	1.6	0.8	1.2	0.9	0.9	1	1	0.8	1.01
		11	26	330	1	0.8	1	0.9	0.9	0.9	0.7	0.9	0.9	0.8	0.88
		11	27	331	1.1	0.7	1.1	0.7	0.9	0.8	0.7	0.9	0.7	0.7	0.83
		11	28	332	1.1	0.8	1.3	0.7	1	0.7	0.7	0.7	0.8	0.7	0.85
		11	29	333	0.7	0.7	1.4	1.2	0.9	0.7	0.8	0.7	0.8	0.7	0.86
		11	30	334	0.8	0.8	1	0.8	0.8	0.8	0.8	0.7	0.7	0.8	0.8
		12	1	335	0.9	0.9	1.1	1.4	1	0.8	0.5	0.9	0.8	0.8	0.91		Average	1.11935	1.16774	1.47419	1.04516	1.32581	1.35806	1.16129	1.35806	1.33226	1.23226
		12	2	336	1	0.7	1.4	1.4	1.1	0.9	0.7	0.7	0.7	0.8	0.94		Total	34.7	36.2	45.7	32.4	41.1	42.1	36	42.1	41.3	38.2
		12	3	337	1	0.8	1.9	1.1	1.2	1	0.9	0.7	0.9	1	1.05		Std. Dv.	0.2301	0.311327	0.265792	0.264372	0.350207	0.403959	0.336331	0.387964	0.370933	0.323921
		12	4	338	0.8	0.8	1.1	1	1	0.7	0.8	0.6	0.7	0.9	0.84		Std. Error	0.0420104	0.0568403	0.0485267	0.0482675	0.0639388	0.0737525	0.0614053	0.0708322	0.0677228	0.0591396
		12	5	339	1	0.7	1.1	1	0.8	0.6	0.9	0.6	0.7	0.7	0.81
		12	6	340	0.8	0.8	1.1	1.5	0.8	0.7	0.8	0.7	0.8	0.9	0.89
		12	7	341	1.2	0.6	0.9	0.8	0.7	0.6	0.7	0.7	0.7	0.7	0.76
		12	8	342	1.1	0.7	1	0.7	0.7	0.7	0.8	0.6	0.6	0.6	0.75
		12	9	343	1.4	0.7	1.1	0.6	1	0.5	0.9	0.7	0.6	0.6	0.81
		12	10	344	1.4	0.6	0.9	0.6	0.9	0.5	0.9	0.6	0.6	0.7	0.77
		12	11	345	0.9	0.7	0.8	0.6	0.7	0.4	0.8	0.6	0.6	0.7	0.68
		12	12	346	0.9	0.6	0.8	0.7	0.8	0.5	0.9	0.7	0.6	0.8	0.73
		12	13	347	0.9	0.7	0.8	0.8	0.9	0.4	0.7	0.7	0.6	0.9	0.74
		12	14	348	0.9	0.8	0.7	0.8	0.8	0.5	0.7	1.1	0.6	1.1	0.8
		12	15	349	0.8	0.8	0.7	0.6	0.7	0.5	0.9	1	0.6	1	0.76
		12	16	350	0.8	0.8	0.8	0.7	0.7	0.5	0.7	0.7	0.6	0.8	0.71
		12	17	351	0.8	1.5	1	1.1	0.6	0.6	0.6	0.8	0.6	0.9	0.85
		12	18	352	0.5	1.5	1.3	1.2	0.6	0.7	0.7	1	0.8	1.1	0.94
		12	19	353	0.7	1.4	1.5	1.9	0.6	0.7	0.7	0.8	0.5	0.9	0.97
		12	20	354	0.6	1.5	1.6	0.9	1	0.7	0.9	1.1	0.7	1.1	1.01
		12	21	355	0.6	1.2	1.6	0.7	0.9	0.7	0.7	0.8	0.6	1	0.88
		12	22	356	1	0.9	1	1	0.6	0.7	0.5	0.7	0.5	0.8	0.77
		12	23	357	0.6	1.1	0.9	0.6	0.6	0.7	0.6	0.9	0.6	0.9	0.75
		12	24	358	0.5	1	0.8	0.5	0.7	0.7	0.6	0.7	0.6	0.8	0.69
		12	25	359	0.7	1.3	0.9	0.7	0.7	0.7	0.7	1.1	0.6	1.2	0.86
		12	26	360	0.8	1.6	1.1	0.8	0.8	0.6	0.6	1.1	0.6	1.4	0.94
		12	27	361	0.5	0.9	1.1	0.5	0.8	0.7	0.6	0.7	0.6	0.8	0.72
		12	28	362	0.7	0.9	1.2	0.7	0.8	0.7	0.7	0.8	0.6	0.7	0.78
		12	29	363	0.9	0.9	0.9	0.9	0.7	0.6	0.6	0.6	0.6	0.7	0.74
		12	30	364	0.8	0.7	1.6	0.8	0.9	0.5	1	0.6	0.5	0.6	0.8
		12	31	365	0.7	0.7	1.2	0.7	0.8	0.6	0.6	0.5	0.6	0.6	0.7
																	Average	0.845161	0.929032	1.09355	0.880645	0.803226	0.635484	0.732258	0.767742	0.635484	0.854839
				TOTAL	1210.4	1177.6	1213.7	1124.1	1312.8	1304.1	1240.5	1306	1319.4	1251.4	1246		Total	26.2	28.8	33.9	27.3	24.9	19.7	22.7	23.8	19.7	26.5
																	Std. Dv.	0.227799	0.302427	0.299928	0.323954	0.155957	0.133037	0.132633	0.173948	0.0914636	0.191204
																	Std. Error	0.0409139	0.0543176	0.0538687	0.0581839	0.0280107	0.0238942	0.0238215	0.0312421	0.0164273	0.0343413
