# Supplementary material for: Assessing of evapotranspiration models using limited climatic data in Southeast Anatolian Project Region of Turkey
Source: PeerJ. 2021 Jun 9;9:e11571. doi: 10.7717/peerj.11571 (PMC8197036; doi:10.7717/peerj.11571)
Supplement: Supplemental Information 3 [file peerj-09-11571-s003.xls]

## Sheet: ETo
Daily ETo estimates (mm/day)
YEAR	MON	DAY	DOY	PM	PEN	FAOP	PT	FAOR	FAOB	SCSB	HARG	Epan	PMD
2003	1	1	1	0.7	0.9	1	0.7	1.3	0.7	1	0.8	-999	0.7
2003	1	2	2	0.7	0.9	0.9	0.7	1.2	0.5	0.8	0.7	-999	0.8
2003	1	3	3	0.7	0.9	0.9	0.8	1.4	0.5	0.9	0.5	-999	0.7
2003	1	4	4	1	1.1	1.2	0.6	-0.1	0.2	0.8	0.5	-999	1.2
2003	1	5	5	0.6	0.8	0.8	0.9	1.3	0.2	0.9	0.6	-999	0.7
2003	1	6	6	0.7	1	1	0.8	1.2	0.7	1.2	0.6	-999	0.8
2003	1	7	7	0.8	1	1	1	1.7	0.8	1.3	0.9	-999	0.9
2003	1	8	8	0.8	1.1	1.2	0.8	0.7	1	1.5	1	-999	0.9
2003	1	9	9	0.8	1.2	1.3	0.8	1.9	1.3	1.4	1.1	-999	0.9
2003	1	10	10	0.8	1.3	1.3	0.7	2.1	1.4	1	1	-999	0.9
2003	1	11	11	0.9	1.3	1.4	0.8	2.2	1.5	1.2	1.2	-999	1
2003	1	12	12	0.9	1.3	1.4	1	2.2	1.6	1.5	1.2	-999	1
2003	1	13	13	0.8	1.2	1.2	0.9	2.1	1.3	1.2	0.8	-999	0.8
2003	1	14	14	0.8	1.2	1.2	0.7	1.1	0.8	0.9	0.6	-999	0.9
2003	1	15	15	0.7	0.9	0.9	0.8	1.3	0.3	0.6	0.9	-999	0.7
2003	1	16	16	0.7	0.9	0.9	0.8	1.4	0.1	0.5	0.9	-999	0.8
2003	1	17	17	0.9	1.1	1.1	0.8	1.3	0.7	0.7	1.1	-999	1
2003	1	18	18	0.9	1.2	1.3	0.8	2	1.1	0.8	1	-999	0.9
2003	1	19	19	0.8	1.3	1.3	0.8	2.2	1.3	0.8	1.1	-999	0.8
2003	1	20	20	1.1	1.4	1.6	0.8	2.1	1.4	0.8	1	-999	1.3
2003	1	21	21	1.3	1.6	1.7	0.8	2.1	1.1	0.6	0.6	-999	1.6
2003	1	22	22	0.9	1.3	1.3	0.9	2	1	0.7	0.8	-999	1
2003	1	23	23	0.8	1.5	1.5	0.9	2.4	1.6	1.1	1.3	-999	0.9
2003	1	24	24	1	1.5	1.5	1	1.6	1.4	1.4	1.2	-999	1.1
2003	1	25	25	0.9	1.4	1.5	1	2	1.3	1.1	1.1	-999	1
2003	1	26	26	0.8	1.3	1.2	0.7	0.1	0.4	1.2	1.2	-999	0.9
2003	1	27	27	0.7	1.2	1.2	0.7	-0.2	0.2	0.9	1	-999	0.8
2003	1	28	28	0.7	0.9	0.9	0.6	0	0.1	0.7	0.8	-999	0.7
2003	1	29	29	1	1.1	1.2	0.6	-0.1	0.2	0.7	0.6	-999	1.2
2003	1	30	30	0.6	0.9	0.9	0.7	-0.1	0.2	1	0.9	-999	0.7
2003	1	31	31	0.7	0.9	0.9	0.8	0.3	0.3	1.1	1	-999	0.8
2003	2	1	32	1.2	1.5	1.6	1.4	2.3	1.4	1.3	1.1	-999	1.3
2003	2	2	33	1.6	1.9	2.2	1.4	2.9	2.2	1.2	1.1	-999	1.8
2003	2	3	34	1.8	2	2.4	1.4	3	2.1	1.2	1.1	-999	2.1
2003	2	4	35	0.9	1.1	1.2	0.8	0.5	0.4	0.8	0.6	-999	1
2003	2	5	36	1.5	1.9	2	1.2	2.8	1.7	1	1	-999	1.7
2003	2	6	37	1.7	2.1	2.3	1.4	3	2.1	1.1	1.1	-999	2
2003	2	7	38	1.5	2	2.1	1.4	2.9	2	1.4	1.3	-999	1.7
2003	2	8	39	1.4	1.8	2	1.5	2.9	1.8	1.3	1.1	-999	1.5
2003	2	9	40	1.2	1.5	1.6	1.6	2.1	0.6	0.9	1	-999	1.3
2003	2	10	41	1.1	1.3	1.4	1.4	1.9	0.3	0.5	0.8	-999	1.1
2003	2	11	42	1.1	1.3	1.4	1.4	2	0.1	0.4	0.9	-999	1.2
2003	2	12	43	1.3	1.5	1.7	1.5	2.3	0.7	0.7	1.3	-999	1.4
2003	2	13	44	0.9	1	1	0.9	0.6	0.2	0.6	0.9	-999	0.9
2003	2	14	45	0.8	1	1	0.8	0.2	0.2	0.7	0.8	-999	0.8
2003	2	15	46	0.7	0.9	0.9	0.6	-0.1	0	0.5	0.7	-999	0.8
2003	2	16	47	0.7	0.8	0.8	0.9	0.5	0	0.6	1	-999	0.7
2003	2	17	48	0.8	0.9	0.9	1.1	0.8	0	0.6	1.1	-999	0.8
2003	2	18	49	1.2	1.4	1.5	1.5	1.9	0.2	0.4	0.7	-999	1.2
2003	2	19	50	1	1.2	1.3	1.2	1.2	0.4	0.5	0.9	-999	1
2003	2	20	51	1	1.2	1.2	1.3	1.2	0.1	0.5	1	-999	1
2003	2	21	52	0.8	1	1	1	0.8	0.1	0.5	0.7	-999	0.9
2003	2	22	53	1.3	1.5	1.6	1.1	1.4	0.6	0.4	1.1	-999	1.5
2003	2	23	54	1.1	1.4	1.4	1	1	0.5	0.6	0.9	-999	1.2
2003	2	24	55	1.4	1.7	1.8	1.5	2	0.9	0.8	1.3	-999	1.5
2003	2	25	56	0.9	1.1	1.1	1.1	0.8	0.3	0.7	1.2	-999	1
2003	2	26	57	0.9	1.2	1.2	1.1	1.1	0.3	0.4	0.6	-999	1
2003	2	27	58	1.1	1.4	1.4	1	1	0.4	0.4	1	-999	1.2
2003	2	28	59	0.9	1.1	1.1	0.9	0.6	0.2	0.6	1.1	-999	1
2003	3	1	60	1.6	1.9	2.2	1.7	2.6	1.1	0.6	1.3	-999	1.8
2003	3	2	61	2.1	2.5	2.7	1.9	3.7	2	0.8	1.4	-999	2.4
2003	3	3	62	2.2	2.7	2.9	2.1	4	2.5	1.1	1.4	-999	2.4
2003	3	4	63	2.2	2.8	3	2.3	4.4	2.8	1.3	1.6	-999	2.5
2003	3	5	64	2.8	3.3	3.7	2.5	4.8	3.7	1.7	1.9	-999	3.3
2003	3	6	65	2.9	3.3	3.6	2.2	4.3	3.5	1.6	1.5	-999	3.3
2003	3	7	66	1.4	1.8	1.9	1	0.4	0.9	1.6	1.9	-999	1.7
2003	3	8	67	1.4	1.8	1.8	1	0.4	0.9	1.6	2	-999	1.6
2003	3	9	68	1.7	2	2.1	1.8	1.9	1.8	1.9	2.3	-999	1.8
2003	3	10	69	1.4	1.7	1.8	1.6	1.4	1.2	1.4	1.7	-999	1.5
2003	3	11	70	1.4	1.7	1.7	1.2	0.9	1	1.4	2.1	-999	1.6
2003	3	12	71	2.3	2.7	3.1	2.7	3.9	2.3	1.2	1.3	-999	2.4
2003	3	13	72	2.5	2.8	3.3	2.6	3.7	2.5	1.3	2.2	-999	2.8
2003	3	14	73	1.2	1.5	1.6	0.8	-0.1	0.5	1.4	1.8	-999	1.4
2003	3	15	74	2.4	2.8	3.2	2.6	3.7	2.6	1.7	2.2	-999	2.6
2003	3	16	75	2.9	3.4	3.9	3.2	4.5	3.1	2	2.2	-999	3.2
2003	3	17	76	2.7	3.1	3.6	3.1	4.2	2.9	1.8	2.4	-999	3
2003	3	18	77	2.2	2.6	3	2.7	3.2	1.9	1.6	1.6	-999	2.4
2003	3	19	78	1.8	2.1	2.3	2	2.1	1.5	1.2	1.3	-999	1.9
2003	3	20	79	1.6	2	2.1	1.7	1.8	1.3	1	1.5	-999	1.7
2003	3	21	80	1.9	2.1	2.3	2.1	2.3	1.3	1.2	2.6	-999	2
2003	3	22	81	1.8	2.1	2.3	2	2.2	1.3	1	1.9	-999	1.9
2003	3	23	82	2.1	2.5	2.8	2.3	3.2	1.9	1	1.4	-999	2.2
2003	3	24	83	2.5	3	3.3	2.4	3.8	2.3	1	1.5	-999	2.9
2003	3	25	84	3.4	3.9	4.4	3.4	5.4	3.9	2	2.7	-999	3.7
2003	3	26	85	2.6	2.9	3.4	3.3	3.8	1.7	1.2	2.4	-999	2.7
2003	3	27	86	2.5	2.9	3.4	3	3.9	1.9	1	1.9	-999	2.6
2003	3	28	87	2.1	2.5	2.8	2.4	3.2	1.3	0.6	1.7	-999	2.2
2003	3	29	88	2.4	2.8	3.3	2.9	3.7	1.8	0.9	1.8	-999	2.6
2003	3	30	89	2.5	2.9	3.4	3	3.9	2.1	1	1.9	-999	2.7
2003	3	31	90	2.6	3	3.5	3.1	4	2.3	1.3	2.4	-999	2.8
2003	4	1	91	2.8	3.2	3.6	3.1	4	2.8	1.8	2.5	3.2	3
2003	4	2	92	2.6	3.1	3.3	2.5	3.3	3	2.3	2.5	2.8	2.8
2003	4	3	93	2.3	2.6	2.6	1.6	1.3	2	2.8	2.8	2	2.7
2003	4	4	94	2.1	2.6	2.6	1.8	1.5	2.5	3.9	3.8	3.4	2.3
2003	4	5	95	2.5	3.1	3.1	1.9	1.8	2.8	4.2	3.2	4.1	2.9
2003	4	6	96	3.1	3.6	3.8	2.9	3.8	3.7	3.2	3.7	4.7	3.5
2003	4	7	97	3.2	3.8	4.1	3.3	4.6	4	2.9	2.7	3.1	3.4
2003	4	8	98	2.2	2.6	2.7	2	1.9	2.3	3	2.9	2.4	2.4
2003	4	9	99	1.8	2.1	2.1	1.9	1.4	1.7	2.8	3	1.9	2
2003	4	10	100	1.2	1.6	1.6	1	0.1	1	2.2	2.8	2.7	1.4
2003	4	11	101	2.1	2.5	2.5	2	1.9	2.1	2.7	3.4	2.7	2.3
2003	4	12	102	2	2.2	2.3	1.1	0.3	1.4	3.1	3.4	5.4	2.4
2003	4	13	103	3.9	4.7	5.1	4.2	6.5	5.7	3.6	3	6.1	4.2
2003	4	14	104	4.2	5.1	5.4	4.5	7.3	6.3	3.9	3.1	4.6	4.5
2003	4	15	105	4	4.5	5.2	4.1	5.9	5	2.8	3.3	3.2	4.4
2003	4	16	106	3.2	3.9	4.4	3.6	4.9	3.5	1.9	1.6	2.9	3.5
2003	4	17	107	3.4	4	4.5	3.9	5.3	4	2.3	2.5	2	3.6
2003	4	18	108	3.3	3.9	4.4	3.5	4.7	3.9	2.4	1.9	3.9	3.7
2003	4	19	109	3.2	3.6	4.1	3.2	3.8	3.5	2.9	3.1	1.6	3.6
2003	4	20	110	2.9	3.4	3.8	3.3	4	2.9	2.1	2.8	3.4	3.1
2003	4	21	111	3.2	3.7	4.2	3.8	4.7	3.4	2	2.7	0.9	3.3
2003	4	22	112	1.7	2.3	2.3	1.6	1.2	1.8	2.4	2.7	1.2	1.9
2003	4	23	113	2.4	3	3.1	2.3	2.7	2.6	2.3	2.6	1.3	2.6
2003	4	24	114	4.5	5	5.5	3.8	5.9	5.5	2.9	3.2	2.7	5.2
2003	4	25	115	2.8	3.4	3.5	2.5	2.9	3.5	3.5	3.8	2.2	3.1
2003	4	26	116	3.3	4	4.1	3.2	4.6	4.1	3	3.9	4	3.6
2003	4	27	117	3.8	4.6	4.9	4.2	6.7	5.1	2.4	3.2	2.9	4
2003	4	28	118	2.8	3.5	3.7	3.2	4.4	3.3	2	2.9	2.2	3
2003	4	29	119	2.5	3	3.2	2.4	2.5	2.8	2.7	2.8	3.3	2.8
2003	4	30	120	3.8	4.1	4.4	3.1	3.8	4.2	3.4	3.7	3.6	4.3
2003	5	1	121	3	3.6	3.6	2.5	2.8	3.6	3.9	3.5	6.9	3.3
2003	5	2	122	2.8	3.3	3.4	2.5	2.7	3.4	3.7	4.4	6	3.1
2003	5	3	123	4	5	5	4.1	6.4	6	4.4	4.2	6.8	4.3
2003	5	4	124	4.6	5.5	5.7	4.4	7.2	7.3	4.8	4.3	6	5.1
2003	5	5	125	4.7	5.6	5.7	4.6	7.2	7.1	5.3	4.3	6.9	5.1
2003	5	6	126	3.9	4.8	4.9	4.4	5.7	5.6	5.4	4.2	5.5	4
2003	5	7	127	3.7	4.3	4.6	4.4	5.4	3.8	3.3	4	9.1	3.9
2003	5	8	128	3.9	4.5	4.9	4.5	5.8	4.3	3	3.9	8.9	4
2003	5	9	129	5.1	5.6	6.7	6.1	7	6.3	4.6	4.2	9.9	5.3
2003	5	10	130	4.4	5.1	5.8	4.9	6.1	6.4	5.4	4.6	7.9	4.7
2003	5	11	131	5.1	5.7	6.5	5.3	6.8	7.2	6	4.5	6.6	5.5
2003	5	12	132	5	5.7	6.4	5.2	6.9	7.4	6	4	6.8	5.4
2003	5	13	133	5.6	6.3	7.2	5.7	8.3	8.6	5.7	5.1	6.9	6.1
2003	5	14	134	5.9	6.6	7.3	5.8	8.6	9	6.4	5.1	6.9	6.5
2003	5	15	135	5.4	6.3	6.6	5.4	8.4	8.5	6.2	4.9	6.9	5.9
2003	5	16	136	4.9	5.8	6	5.1	8	7.3	4.8	5.2	7.5	5.2
2003	5	17	137	4.8	5.9	5.9	5.2	8.3	7.6	5.1	5.2	6.9	5
2003	5	18	138	4.4	5.4	5.5	4.7	7.2	6.8	4.6	5.2	4.4	4.8
2003	5	19	139	4.8	5.7	5.9	5.2	7.7	7.1	5.3	5	4.6	5.1
2003	5	20	140	3.8	4.6	4.9	4.2	5.2	5.5	5.2	5.1	6.4	4.1
2003	5	21	141	5.4	6.3	6.7	5.8	8.2	8.2	6.6	5.2	8.1	5.7
2003	5	22	142	5.2	6.2	6.7	5.9	8.6	8.2	5.1	4.4	6.4	5.5
2003	5	23	143	5.7	6.5	7.1	5.7	8.8	8.8	5.6	4.6	5.2	6.2
2003	5	24	144	5.6	6.5	7	6.3	9	8.5	6.1	5.2	4.5	5.9
2003	5	25	145	5.5	6.5	7.2	6.3	8.8	9.2	6.7	5	5.7	5.7
2003	5	26	146	5.3	6.1	7	5.8	7.6	7.8	5.8	4.2	7	5.7
2003	5	27	147	5.2	5.9	6.5	5.4	7.3	7.1	5.3	4.8	6.7	5.6
2003	5	28	148	4.5	5.1	5.6	4.4	5.8	6.4	5.3	4.4	6.3	4.9
2003	5	29	149	4.3	5.1	5.3	4.1	5.6	6.2	5.5	4.5	5.8	4.8
2003	5	30	150	5.3	6.1	6.8	5.9	8	7.8	5.8	4.5	6.1	5.6
2003	5	31	151	5	5.9	6.5	5.7	8.2	7.4	4.4	3.8	5.2	5.3
2003	6	1	152	3.6	4.2	4.5	3.6	4.4	5	4.2	4.8	3.1	3.9
2003	6	2	153	5	6	6	5.2	8.3	7.7	5.1	4.9	4.4	5.4
2003	6	3	154	5.2	6	6.7	6.1	8.1	7.2	4.9	4.5	4.7	5.5
2003	6	4	155	5.2	6	6.7	5.9	8.2	7.4	4.7	5	6.2	5.5
2003	6	5	156	4.9	5.7	6.2	5.3	7.3	7.1	4.8	4.3	5.9	5.2
2003	6	6	157	5	5.7	6.1	4.9	7.3	7.2	4.8	4.9	7.3	5.5
2003	6	7	158	6.2	6.9	7.4	6	9	8.8	5.8	5.6	6.8	6.9
2003	6	8	159	6.4	6.9	7.9	6.4	8.7	9	6.7	5.8	7.8	7
2003	6	9	160	6.7	7.4	8.5	7.1	9.3	9.8	7.5	5.9	8.2	7.2
2003	6	10	161	6.9	7.6	8.7	7	9.7	10.8	7.7	5.8	7.3	7.5
2003	6	11	162	6.5	7.3	8.4	6.8	9.3	10.5	7.6	5.7	8.3	7.1
2003	6	12	163	6.4	7	7.7	5.8	8.7	9.2	6.4	5	6.8	7.2
2003	6	13	164	6	6.8	7.3	5.8	8.7	9.4	7.2	5.7	6.7	6.6
2003	6	14	165	5.6	6.6	6.8	5.9	8.9	9.1	7.1	6.2	7.1	6
2003	6	15	166	6	7.2	7.3	6.3	9.9	10.4	8	6.5	7.8	6.5
2003	6	16	167	6.6	7.5	8.3	6.9	9.8	11.2	8.4	6	7.3	7.2
2003	6	17	168	7.1	7.8	8.5	6.8	9.7	10.7	8.5	5.1	7.9	7.8
2003	6	18	169	-999	-999	-999	-999	-999	-999	7.6	5.8	7.3	-999
2003	6	19	170	-999	-999	-999	-999	-999	-999	7.3	6.3	7.8	-999
2003	6	20	171	7.4	8	9.1	6.8	10	11.4	8	5.4	7.4	8.3
2003	6	21	172	7	7.7	8.7	6.9	10	11.1	7.8	6	8.2	7.8
2003	6	22	173	7.1	7.8	8.5	6.8	10.1	11.1	8	5.8	7.9	7.8
2003	6	23	174	6	7.1	7.4	6.7	9.9	9.7	7.3	6.1	8	6.4
2003	6	24	175	5.3	6	6.5	5.1	7.2	7.9	6.2	5.2	9.7	5.9
2003	6	25	176	6.1	6.7	7.5	6.2	8.7	8.9	6	6.7	12.9	6.7
2003	6	26	177	7	7.4	8.1	6.1	9.1	10.1	7.4	6.4	9.4	7.9
2003	6	27	178	6.9	7.5	8.5	6.6	9.4	10.6	7.8	6.1	9.2	7.7
2003	6	28	179	6.1	6.9	7.7	6.1	8.8	10.2	7.8	5.8	10	6.7
2003	6	29	180	7	7.7	8.3	6.2	10	11.5	7.7	5.8	9	7.9
2003	6	30	181	6.6	7.4	7.9	6.5	10	10.6	7.3	6.5	9.2	7.2
2003	7	1	182	7	7.6	8.5	6.6	10.1	11	7.2	6	8.2	7.8
2003	7	2	183	7.2	7.7	9	6.8	9.7	11.5	8.1	6.1	7.6	8.1
2003	7	3	184	7.7	8.2	9.6	7.2	10.1	12.6	9.1	6.4	7.7	8.7
2003	7	4	185	7.7	8.3	8.9	6.6	10.5	12.7	9.5	6.7	7.6	8.7
2003	7	5	186	6.7	7.7	8	6.4	10.2	12.1	10	6.6	8.1	7.4
2003	7	6	187	7	7.8	8.8	7.3	9.2	11.3	10.4	6.6	9.3	7.5
2003	7	7	188	7.7	8.3	9.3	7.1	10	11.9	9.7	5.7	8.9	8.6
2003	7	8	189	7.7	8	8.8	6.2	10.1	11	6.7	6.1	7.5	8.9
2003	7	9	190	6.6	7.3	7.5	5.9	9.9	10.5	7	5.9	5.5	7.3
2003	7	10	191	6	7.1	7.4	6.3	9.5	10.1	8.1	5.6	7.4	6.5
2003	7	11	192	-999	-999	-999	-999	-999	-999	8	6.5	8.8	-999
2003	7	12	193	7.4	7.7	8.1	5.6	9	11.4	9	7	10	8.6
2003	7	13	194	6.9	7.7	7.8	5.9	9.8	11.7	9.4	6.8	9.1	7.8
2003	7	14	195	7.3	7.8	8.1	6	9.9	11.5	8.8	6.6	9.9	8.3
2003	7	15	196	-999	-999	-999	-999	-999	-999	9.7	6.7	7.5	-999
2003	7	16	197	8.7	8.9	9.3	6.1	11.1	13.9	10.2	6.8	8.9	10.2
2003	7	17	198	7.5	7.6	7.8	4.8	8.1	10.7	9	6.7	9.4	8.9
2003	7	18	199	5.9	6.3	6.3	4.1	6.2	8.1	7.8	6	10	6.9
2003	7	19	200	5.4	6.2	6.4	4.7	7.1	8.6	7.5	5.6	10	6.1
2003	7	20	201	5.5	6.6	6.6	5.5	9	9.7	7.8	6.1	9.4	5.9
2003	7	21	202	5.7	6.8	7.1	5.8	8.7	10	8.3	6.2	9.2	6.2
2003	7	22	203	5.4	6.2	6.4	4.7	6.9	8.8	8.6	6.4	9.7	6
2003	7	23	204	6.6	7.3	7.7	5.9	9.6	10.7	7.9	5.9	10.2	7.4
2003	7	24	205	3.1	3.7	3.7	2.5	2.3	4.5	7.7	6.3	10.4	3.5
2003	7	25	206	5.9	6.7	7.4	6.5	8.3	8.5	7.7	5.9	11.7	6.2
2003	7	26	207	5.8	6.8	7.1	5.9	9.1	9.9	7.6	6.3	10.4	6.3
2003	7	27	208	5.7	6.8	6.8	5.8	9.6	10	7.8	6.2	10.4	6.1
2003	7	28	209	5.9	6.4	7.4	5.5	7.7	9.2	6.9	6	8.3	6.6
2003	7	29	210	5	5.6	6	4.6	6.1	7.3	7	5.3	6.6	5.5
2003	7	30	211	5.2	6.1	6.4	5.5	7.6	7.8	7.1	5.9	6.5	5.6
2003	7	31	212	5.2	6.4	6.4	5.7	8.6	9	7.5	6.2	7.5	5.5
2003	8	1	213	5.1	6.5	6.4	5.5	8.8	9.8	8.4	6.3	8.5	5.5
2003	8	2	214	6	7	7.2	5.5	8.9	10.7	8.8	6	8.1	6.7
2003	8	3	215	7.5	8	8.9	6.5	9.9	12.5	9.5	6.8	8.2	8.5
2003	8	4	216	7.2	7.7	8.8	6.9	9.1	10.9	9.6	6.6	9.6	8
2003	8	5	217	6.6	7.4	8	6.5	9.5	10.7	8.9	6.1	9.6	7.2
2003	8	6	218	6.4	7.2	8	6.4	9	10.5	8.6	6	10	7
2003	8	7	219	6.7	7.1	8.2	6.3	8.2	9.7	8.4	6.3	10.6	7.5
2003	8	8	220	6.3	7.1	8.1	6.7	8.5	10.4	9.2	6.9	10.2	6.8
2003	8	9	221	6.2	6.9	7.8	6.4	8.1	9.6	9	5.6	9.9	6.8
2003	8	10	222	4.2	4.7	5.1	3.9	4.2	6.4	9.3	5.6	9.7	4.6
2003	8	11	223	5.9	6.6	7.5	6.5	7.4	8.8	9.4	5.3	9.1	6.3
2003	8	12	224	5.7	6.6	7.4	6.3	8.3	9.5	8.1	5.7	8.9	6.1
2003	8	13	225	5.6	6.3	7.2	6	7.5	8.5	7.6	6.1	9.6	6
2003	8	14	226	5.6	6.4	7.1	5.9	7.9	8.8	7.3	5.5	9.8	6
2003	8	15	227	5.2	6.2	6.5	5.5	8.2	8.7	7	5.7	9.2	5.6
2003	8	16	228	5.3	6.2	6.6	5.3	7.9	8.9	7.3	6	7.4	5.7
2003	8	17	229	6.3	7	7.5	5.7	8.5	9.9	8.5	5.7	6.7	7
2003	8	18	230	6.6	7.1	8.4	6.4	8.4	10.6	8.9	6	7.4	7.3
2003	8	19	231	6.2	6.7	7.8	6.2	7.9	9.8	8.4	6.1	8.1	6.8
2003	8	20	232	5.3	6.1	6.7	5.8	7.1	8.1	8.4	6.1	8.6	5.7
2003	8	21	233	5.6	6.4	7.3	6.2	7.4	9.3	9	5.5	8.6	5.9
2003	8	22	234	4.9	6	6	4.8	8.1	8.8	7.2	4.6	7.9	5.3
2003	8	23	235	5.8	6.6	6.8	4.9	8.6	10	7.6	5.2	6.6	6.5
2003	8	24	236	5.7	6.4	6.8	5.3	8.3	9	7.1	5.6	6.9	6.3
2003	8	25	237	5	6	6.2	5.1	7.9	8.5	7.2	4.9	7.3	5.4
2003	8	26	238	4.7	5.7	5.9	4.7	7.6	8.2	6.6	4.8	5.9	5.1
2003	8	27	239	5	6	6.2	5.1	8	8.6	7.2	5.2	5.7	5.4
2003	8	28	240	4.8	5.9	6	4.9	8.1	9	7.5	5.2	5.7	5.2
2003	8	29	241	4.5	5.7	5.7	4.5	7.5	8.6	7.7	5.3	6.7	4.9
2003	8	30	242	4.9	6.1	6.1	4.8	8.3	9.4	8	5.1	5.5	5.4
2003	8	31	243	4.7	5.8	6	4.7	7.8	8.8	7.6	5	5.7	5
2003	9	1	244	4.9	5.9	6.1	4.8	7.7	9	8	5.4	6.5	5.3
2003	9	2	245	4.8	5.9	6.4	5.1	7.5	9.2	8.3	5.2	6.2	5.2
2003	9	3	246	4.9	6	6	4.5	7.7	9	8.1	4.6	6.3	5.4
2003	9	4	247	4.7	5.8	5.9	4.7	7.4	8.5	7.8	4.2	6.2	5.1
2003	9	5	248	4.7	5.6	5.8	4.4	7.2	8.1	6.5	4.2	5.8	5.2
2003	9	6	249	4.2	5.2	5.3	4	7.3	7.2	4.9	3.8	5.1	4.7
2003	9	7	250	4.4	5.1	5.2	3.6	7.1	6.5	3.8	4	4.9	5.1
2003	9	8	251	5	5.5	5.6	3.6	7.3	7.5	4.3	4.5	5.7	5.9
2003	9	9	252	4.8	5.3	5.6	3.7	6.7	7.2	4.9	4.1	6.1	5.5
2003	9	10	253	4.2	5.1	5.3	4	6.7	7.2	5.6	4.2	6	4.7
2003	9	11	254	4.3	5.3	5.5	4.2	7.1	7.9	6.1	4.7	6.3	4.7
2003	9	12	255	3.8	4.8	5	4	6.7	6.8	5.2	3.9	6.1	4.1
2003	9	13	256	3.9	4.9	5.1	3.9	6.7	7.2	5.4	4.2	5.1	4.2
2003	9	14	257	4.5	5.3	5.4	3.6	6.9	8.1	6.2	4	5.5	5.1
2003	9	15	258	3.6	4.7	4.8	3.9	6.2	6.8	5.8	4.2	5.3	3.8
2003	9	16	259	3.9	4.9	5.1	4	6.5	7	6	4.1	4.8	4.2
2003	9	17	260	4.5	5.1	5.3	3.6	6.6	7	5.2	3.5	4.9	5.1
2003	9	18	261	3	4.2	4.1	3.4	5.9	5.7	4.2	3.5	4.5	3.2
2003	9	19	262	3.3	4.2	4.4	3.7	5.6	5.4	4.3	3.7	5.3	3.5
2003	9	20	263	3.2	4.1	4.3	3.5	5.4	5.4	4.1	3.5	5.7	3.5
2003	9	21	264	3.1	4.2	4.1	3.3	5.9	5.7	4.2	3.5	4.9	3.3
2003	9	22	265	3.4	4.2	4.5	3.7	5.7	5.9	4.7	4	5.8	3.6
2003	9	23	266	2.9	3.5	3.7	2.7	3.4	4.4	5.2	3.8	6.1	3.2
2003	9	24	267	3.9	4.4	4.8	3.5	5	5.6	5.3	3.7	6.2	4.4
2003	9	25	268	3.9	4.5	4.9	3.8	5.4	6.3	6	4.1	8.2	4.2
2003	9	26	269	3.1	4	4.1	3.3	4.5	5.5	6.4	4.1	6.8	3.3
2003	9	27	270	3.1	3.9	4.1	3.4	4.4	5.4	5.7	3.8	5.9	3.2
2003	9	28	271	3.5	4.4	4.7	4	5.9	6.2	5.6	3.8	4.9	3.7
2003	9	29	272	3.3	4	4.3	3.6	4.9	5.2	5.1	4	6.2	3.5
2003	9	30	273	2.8	3.6	3.7	2.8	4.2	4.5	4.6	3.3	6.4	3
2003	10	1	274	2.9	3.7	3.9	2.9	4.6	5	4.2	2.8	3.9	3.2
2003	10	2	275	2.9	3.9	3.9	3.1	5.7	5.6	4.2	2.9	3.9	3.1
2003	10	3	276	2.7	3.4	3.6	3.1	4.8	4.2	3.2	2.6	2.8	2.9
2003	10	4	277	2.9	3.4	3.8	3.3	4.6	4	3.3	2.8	1.9	3
2003	10	5	278	3.2	3.8	4.2	3.4	5.1	5.1	4.1	3	3.9	3.4
2003	10	6	279	3.1	3.8	4.1	3.2	5.1	5.1	4.3	3.4	4.1	3.3
2003	10	7	280	3.1	4	4.3	3.3	5.3	6.1	5.2	3.6	5	3.4
2003	10	8	281	2.8	4	3.9	3	5.4	6.2	5.8	3.5	4.9	2.9
2003	10	9	282	2.8	3.8	3.8	2.8	5.1	5.6	5	3.3	4.6	3
2003	10	10	283	3.4	4.1	4.4	3	5	5.8	5.4	3.2	3.8	3.9
2003	10	11	284	2.3	3	3	2.2	2.5	3.7	5.3	3	5.9	2.6
2003	10	12	285	2.6	3.3	3.5	2.7	4.1	4.5	4.5	2.8	5	2.8
2003	10	13	286	2.7	3.5	3.6	2.7	4.8	5	4	3	3.2	2.9
2003	10	14	287	-999	-999	-999	-999	-999	-999	4.9	3.4	3.4	-999
2003	10	15	288	-999	-999	-999	-999	-999	-999	5.2	3.2	4.5	-999
2003	10	16	289	-999	-999	-999	-999	-999	-999	4.9	2.2	4.7	-999
2003	10	17	290	-999	-999	-999	-999	-999	-999	4.1	2.8	4.7	-999
2003	10	18	291	-999	-999	-999	-999	-999	-999	3.6	2.5	4.8	-999
2003	10	19	292	2.1	2.8	2.8	1.7	2.5	3.1	3.5	2.3	2.9	2.4
2003	10	20	293	2.8	3.2	3.6	3	4.3	4.3	3.8	2.4	4.1	3
2003	10	21	294	2.4	3.1	3.3	2.7	4.5	4.5	3.9	2.9	3.9	2.5
2003	10	22	295	2.5	2.8	3	3	3.4	3.4	4.1	3	3.5	2.5
2003	10	23	296	2.7	3.2	3.5	3.3	4	4.3	4.7	2.6	2.8	2.8
2003	10	24	297	2.2	2.4	2.5	2.6	2.6	2.5	4.3	2.7	3.7	2.2
2003	10	25	298	1.7	2.1	2.1	1.9	1.8	2.4	4.5	2.7	4.2	1.8
2003	10	26	299	1.9	2.2	2.3	2.2	2.3	2.5	3.7	2.5	4.6	2
2003	10	27	300	1.9	2.2	2.4	1.9	2.4	2.6	3	2	4.7	2.1
2003	10	28	301	1.2	1.6	1.6	1.3	1.2	1.5	2.3	1.7	3.7	1.3
2003	10	29	302	1.2	1.7	1.7	1.2	1.6	1.3	1.2	1.5	2.3	1.3
2003	10	30	303	1.3	1.8	1.8	1.2	2.4	1.6	1	1.4	2.1	1.4
2003	10	31	304	1.2	1.8	1.8	1.1	1.5	1.3	1.2	0.9	1.9	1.4
2003	11	1	305	1.9	2.3	2.5	1.5	3.3	2.9	1.8	1.9	-999	2.1
2003	11	2	306	1.8	2.2	2.4	1.5	3	2.7	2	2	-999	2
2003	11	3	307	1.8	2	2.1	1	0.4	1.2	2.6	2.1	-999	2.2
2003	11	4	308	1.5	1.8	1.9	1.1	0.7	1.7	3.1	2.1	-999	1.7
2003	11	5	309	1.4	2.1	2.1	1.5	2	2.7	3.3	2	-999	1.5
2003	11	6	310	1.6	2.3	2.4	1.8	3	3.5	3.3	2	-999	1.7
2003	11	7	311	2.1	2.6	2.9	1.7	3.3	4.1	3.3	1.9	-999	2.4
2003	11	8	312	1.9	2.6	2.7	1.4	4	4.2	2.9	1.6	-999	2.2
2003	11	9	313	2.4	2.6	2.8	1.2	3	3.1	2.1	1.6	-999	2.9
2003	11	10	314	1.3	2	2	1.3	3.2	2.7	1.8	1.3	-999	1.5
2003	11	11	315	1.8	2.1	2.2	0.9	1.3	1.6	1.5	0.9	-999	2.2
2003	11	12	316	1.4	1.9	1.9	1	1.7	1.6	1.4	1	-999	1.6
2003	11	13	317	1.1	1.5	1.6	1.2	2.5	1.6	1.1	1.1	-999	1.2
2003	11	14	318	0.8	1	1	0.9	0.8	0.5	1	1.2	-999	0.8
2003	11	15	319	1	1.4	1.4	0.8	0.8	1	1.2	1.5	-999	1.1
2003	11	16	320	0.9	1.6	1.5	0.9	2.2	1.6	1.2	1.1	-999	1
2003	11	17	321	0.9	1.6	1.5	0.9	1.8	1.4	1.2	1.1	-999	1
2003	11	18	322	0.8	1.4	1.3	0.8	0.5	0.7	1.3	1.2	-999	0.9
2003	11	19	323	0.7	1.3	1.2	0.8	0.3	0.6	1.1	1	-999	0.8
2003	11	20	324	1	1.5	1.5	0.8	1.9	1.4	0.9	1.1	-999	1.2
2003	11	21	325	1.2	1.8	1.8	0.8	1.9	1.9	1.4	1.4	-999	1.5
2003	11	22	326	1.1	1.7	1.7	0.8	2.5	2.1	1.4	1.3	-999	1.3
2003	11	23	327	1.2	1.7	1.7	1	2.5	2.1	1.8	1.5	-999	1.3
2003	11	24	328	1.1	1.7	1.8	1.1	2.9	2.6	2.2	1.6	-999	1.2
2003	11	25	329	0.9	1.4	1.5	1	2.5	1.8	1.5	1.3	-999	1
2003	11	26	330	0.9	1.2	1.3	1	2	1.2	1.2	0.9	-999	1
2003	11	27	331	0.9	1.1	1.2	1.1	1.8	0.9	1.2	0.8	-999	0.9
2003	11	28	332	0.9	1.3	1.4	1	2	1.7	1.4	1.2	-999	1
2003	11	29	333	1.1	1.5	1.6	0.9	2.3	1.9	1.4	1.1	-999	1.3
2003	11	30	334	1	1.5	1.6	0.9	2.5	2.3	1.6	1.3	-999	1.1
2003	12	1	335	1.3	1.7	1.8	0.6	2.6	2.2	1.3	0.9	-999	1.5
2003	12	2	336	1.2	1.6	1.8	0.7	2.5	2.1	1.3	0.9	-999	1.5
2003	12	3	337	1.1	1.6	1.7	0.6	2.5	1.9	1.1	1	-999	1.4
2003	12	4	338	1.1	1.6	1.7	0.6	2.5	2	1.2	1	-999	1.4
2003	12	5	339	1.7	1.9	2.2	0.6	2.6	2.5	1.3	1.1	-999	2.2
2003	12	6	340	1.9	2.1	2.3	0.6	2.6	2.5	1.2	0.9	-999	2.5
2003	12	7	341	1	1.3	1.5	0.7	2.2	1.5	1	0.7	-999	1.2
2003	12	8	342	0.7	1.2	1.2	0.7	1.5	1.2	1.1	0.5	-999	0.8
2003	12	9	343	0.7	1.1	1.1	0.7	0.1	0.4	1.2	0.7	-999	0.7
2003	12	10	344	0.8	1.3	1.3	0.7	0.9	1	1.3	0.8	-999	0.9
2003	12	11	345	0.7	1	1.1	0.6	1.8	0.9	0.8	0.9	-999	0.7
2003	12	12	346	0.8	1.3	1.3	0.5	2	1.4	0.9	0.9	-999	0.9
2003	12	13	347	0.9	1.1	1.2	0.8	1.9	1.3	1.2	1.1	-999	1
2003	12	14	348	0.9	1.1	1.2	0.8	1.5	1	1.2	0.8	-999	1.1
2003	12	15	349	0.6	1	1	0.7	1.1	0.6	0.9	0.7	-999	0.7
2003	12	16	350	0.7	1.1	1.1	0.7	1.7	1.1	1	0.8	-999	0.7
2003	12	17	351	1	1.3	1.4	0.7	0.2	0.5	1.2	0.6	-999	1.2
2003	12	18	352	1.1	1.3	1.5	0.6	1.8	1.5	1	0.9	-999	1.4
2003	12	19	353	1.1	1.3	1.5	0.5	1.7	0.8	0.5	0.5	-999	1.4
2003	12	20	354	0.6	1	1.1	0.5	1.6	0.5	0.4	0.5	-999	0.7
2003	12	21	355	0.7	1.1	1.1	0.5	0.9	0.4	0.5	0.7	-999	0.8
2003	12	22	356	0.8	1.2	1.2	0.5	0.7	0.4	0.5	0.7	-999	0.9
2003	12	23	357	0.6	1	1	0.5	1.1	0.4	0.5	0.7	-999	0.7
2003	12	24	358	0.7	1.2	1.2	0.6	0.1	0.2	0.8	0.6	-999	0.8
2003	12	25	359	0.7	1.3	1.2	0.6	0.5	0.6	1	1.1	-999	0.7
2003	12	26	360	0.7	1.1	1.1	0.6	0.9	0.6	0.9	0.9	-999	0.7
2003	12	27	361	0.6	0.9	1	0.6	1.7	0.6	0.8	0.8	-999	0.7
2003	12	28	362	0.6	0.8	0.9	0.7	1.6	0.4	0.7	0.5	-999	0.6
2003	12	29	363	0.7	1	1.1	0.6	1.7	0.5	0.8	0.7	-999	0.8
2003	12	30	364	0.7	1	1	0.7	1.6	0.7	1	0.9	-999	0.8
2003	12	31	365	0.6	0.9	0.9	0.7	0.5	0.3	1	0.9	-999	0.7
2004	1	1	1	0.7	1	1.1	0.7	1.8	0.7	1	0.8	-999	0.8
2004	1	2	2	0.8	1	1.1	0.7	1.8	0.5	0.8	0.7	-999	0.8
2004	1	3	3	0.7	1	1	0.7	1.8	0.6	0.9	0.9	-999	0.7
2004	1	4	4	1.3	1.5	1.6	0.7	1.9	1.2	0.9	0.6	-999	1.6
2004	1	5	5	0.5	0.6	0.6	0.6	-0.1	-0.1	0.8	0.5	-999	0.5
2004	1	6	6	0.6	0.8	0.8	0.6	-0.2	0.1	0.9	0.7	-999	0.6
2004	1	7	7	0.5	0.6	0.6	0.6	-0.3	0	0.7	0.7	-999	0.5
2004	1	8	8	0.5	0.8	0.8	0.5	0.2	-0.1	0.3	0.6	-999	0.6
2004	1	9	9	0.5	0.7	0.7	0.5	-0.2	-0.1	0.3	0.6	-999	0.5
2004	1	10	10	0.6	0.8	0.8	0.5	-0.1	-0.1	0.3	0.5	-999	0.6
2004	1	11	11	0.8	1.1	1.1	0.7	0.8	0.4	0.7	0.8	0.2	0.9
2004	1	12	12	0.8	1.1	1.1	0.8	0.9	0.7	1.1	0.9	-999	0.8
2004	1	13	13	0.7	1	1	0.8	0.9	0.6	1	0.9	-999	0.7
2004	1	14	14	0.8	1.2	1.3	0.8	2	1.1	0.8	0.5	-999	0.9
2004	1	15	15	0.8	1.1	1.2	0.9	2	0.7	0.8	0.7	-999	0.8
2004	1	17	17	0.9	1.3	1.3	0.8	1.6	0.8	0.8	0.9	2	1
2004	1	18	18	0.8	1.2	1.3	0.8	1.8	0.9	0.7	0.8	-999	0.9
2004	1	19	19	0.7	1.2	1.2	0.7	1.4	0.8	0.7	0.9	-999	0.7
2004	1	20	20	1.2	1.4	1.5	0.8	1.2	1.2	1	1.2	-999	1.4
2004	1	21	21	1.4	1.6	1.8	0.9	2.1	1.6	0.9	0.9	-999	1.7
2004	1	22	22	0.9	1.3	1.3	0.9	1.5	1	0.9	0.8	-999	1
2004	1	23	23	0.7	1.2	1.1	0.7	0.7	0.6	0.8	0.7	-999	0.7
2004	1	24	24	0.9	1.2	1.3	0.9	1.7	0.8	0.7	0.6	-999	0.9
2004	1	25	25	0.7	1	1	0.7	0.4	0.3	0.7	0.7	-999	0.7
2004	1	26	26	0.8	1.1	1.1	0.8	1	0.5	0.7	0.7	-999	0.8
2004	1	27	27	0.6	1	1	0.6	-0.2	0.1	0.7	0.9	-999	0.7
2004	1	28	28	0.8	1	1.1	0.9	1	0.4	0.8	0.7	-999	0.9
2004	1	29	29	1.6	1.8	2	1.2	2.2	1.6	1.1	1.2	-999	1.9
2004	1	30	30	1	1.2	1.3	1.1	1.5	0.8	1.1	1.2	-999	1.1
2004	1	31	31	0.7	0.8	0.8	0.7	0	0.2	1.2	1.2	-999	0.7
2004	2	1	32	0.7	0.9	0.9	0.7	0.1	0.2	0.8	0.9	-999	0.8
2004	2	2	33	1.4	1.6	1.9	1.3	2.4	1.6	0.9	1.2	-999	1.6
2004	2	3	34	1.3	1.5	1.6	0.9	1.1	0.9	0.8	0.9	-999	1.5
2004	2	4	35	1.1	1.4	1.5	1.1	1.8	0.9	0.8	0.7	-999	1.2
2004	2	5	36	1.3	1.6	1.7	1.1	1.6	1.3	1.1	1.2	-999	1.5
2004	2	6	37	1.1	1.3	1.4	0.8	0.4	0.5	0.8	1	-999	1.3
2004	2	7	38	1	1.2	1.3	0.8	0.3	0.6	1.2	1.4	-999	1.1
2004	2	8	39	1.1	1.4	1.4	1.1	1.1	1.1	1.4	1.4	-999	1.2
2004	2	9	40	1.3	1.5	1.6	1.6	1.9	1	1.5	1.3	-999	1.3
2004	2	10	41	0.9	1.1	1.1	1	0.5	0.6	1.7	1.4	-999	0.9
2004	2	11	42	0.8	1	1	0.8	0.2	0.4	1.2	1.1	-999	0.8
2004	2	12	43	1	1.2	1.2	1	0.9	0.5	0.9	1.2	-999	1.1
2004	2	13	44	1.3	1.6	1.7	1.4	1.9	0.9	1.1	1.1	-999	1.5
2004	2	14	45	1.3	1.6	1.7	1.4	2	0.8	0.9	1.4	-999	1.4
2004	2	15	46	0.9	1.1	1.1	0.9	1	-0.1	0.2	0.8	-999	1
2004	2	16	47	0.6	0.8	0.8	0.8	0.6	-0.6	0	0.6	-999	0.7
2004	2	17	48	0.6	0.7	0.7	0.7	0.3	-0.3	0.2	0.9	-999	0.6
2004	2	18	49	0.7	0.9	0.9	0.8	0.4	0	0.5	0.8	-999	0.8
2004	2	19	50	1.2	1.5	1.6	1.4	1.8	0.7	0.7	1.1	-999	1.3
2004	2	20	51	1	1.1	1.1	1.2	1	0.3	0.8	0.9	-999	1
2004	2	21	52	1.4	1.6	1.8	1.7	2.2	0.6	0.8	1	-999	1.4
2004	2	22	53	1.3	1.5	1.6	1.1	1.5	0.5	0.4	1	-999	1.5
2004	2	23	54	0.6	0.8	0.8	0.6	0	-0.2	0.2	0.6	-999	0.6
2004	2	24	55	1.2	1.4	1.6	1.4	1.9	0.1	0.3	1	-999	1.3
2004	2	25	56	1.5	1.8	1.9	1.7	2.7	0.6	0.6	1.4	-999	1.5
2004	2	26	57	1.7	2.1	2.2	2	3.2	1.5	1	1.5	-999	1.7
2004	2	27	58	2	2.5	2.7	2.1	3.4	2.4	1.6	1.9	-999	2.2
2004	2	28	59	1.5	1.8	1.9	1.7	1.7	1.3	2	2.1	-999	1.6
2004	2	29	60	2	2.2	2.4	1.7	1.8	2.2	2.4	2.4	-999	2.3
2004	3	1	60	2.6	3.1	3.4	2.2	3.7	3.9	2.7	2	-999	3
2004	3	2	61	2.1	2.5	2.8	2	2.7	3	2.3	1.6	-999	2.3
2004	3	3	62	2.4	3.1	3.1	2	3.8	3.5	2.6	2	-999	2.7
2004	3	4	63	3	3.4	3.5	1.9	3	3.4	3	2	-999	3.5
2004	3	5	64	3.6	4.1	4.5	2.7	5.3	5.4	3.2	1.6	-999	4.2
2004	3	6	65	2.7	3.2	3.7	2.8	4.9	3.9	2.1	2.2	-999	3
2004	3	7	66	1.7	2.1	2.3	1.9	2.5	1.6	1	1.4	-999	1.9
2004	3	8	67	1.9	2.3	2.5	2.2	3.3	1.6	1	1.9	-999	2
2004	3	9	68	2.1	2.5	2.7	2.4	3.5	1.7	1.1	1.4	-999	2.2
2004	3	10	69	2.5	3	3.3	2.7	4.4	2.8	1.7	2.2	-999	2.7
2004	3	11	70	2.1	2.5	2.7	2.2	3.1	2.2	1.5	1.7	-999	2.2
2004	3	12	71	2.2	2.6	2.9	2.1	2.8	2.2	1.5	1.8	-999	2.5
2004	3	13	72	2	2.4	2.6	2	2.7	1.8	1.2	2	-999	2.2
2004	3	14	73	2.3	2.8	2.9	2.4	3.8	2.2	1.3	2.1	-999	2.5
2004	3	15	74	1.6	1.9	1.9	1.1	0.7	0.7	1.2	1.9	-999	1.9
2004	3	16	75	1.9	2.3	2.4	1.8	2.4	1.3	0.9	1.9	-999	2.2
2004	3	17	76	1.8	2.2	2.3	2	2.2	1.3	1.4	1.9	-999	2
2004	3	18	77	2.6	3	3.5	3	4	2.5	1.5	2.1	-999	2.8
2004	3	19	78	2.6	3.1	3.5	3	4.2	2.9	1.7	1.9	-999	2.7
2004	3	20	79	2.7	3.2	3.4	3.1	4.6	2.5	1.7	2.4	-999	2.9
2004	3	21	80	2.4	2.8	3	2.5	3.2	2.4	2.2	2.9	-999	2.6
2004	3	22	81	2.3	2.7	2.9	2.2	2.4	2.8	2.8	3	-999	2.6
2004	3	23	82	3.7	4	4.8	3.6	5	5	3.2	2.8	-999	4.1
2004	3	24	83	3.8	4.3	5.1	4	5.7	5.1	3.1	2.8	-999	4.2
2004	3	25	84	2.6	3	3.2	2.9	3.2	2.5	3.4	3	-999	2.8
2004	3	26	85	3.3	3.8	4.1	3.4	4.6	3.9	3.4	3.1	-999	3.5
2004	3	27	86	3.4	3.9	4.3	3.5	5	4.1	3.1	2.7	-999	3.6
2004	3	28	87	3.1	3.5	3.7	2.9	3.6	3.4	3.5	3.4	-999	3.4
2004	3	29	88	3	3.4	3.8	3.1	3.6	3.8	3.7	2.8	-999	3.2
2004	3	30	89	2.8	3.4	3.6	3	4	3.2	2.9	2.9	-999	3
2004	3	31	90	2.4	2.7	3.1	2.6	3.1	2.3	1.8	2.6	-999	2.6
2004	4	1	91	2.5	2.9	3.1	2.3	3.1	2.5	1.9	3.3	2.5	2.8
2004	4	2	92	3.2	3.8	4.1	3.2	5.1	3.5	1.7	2.3	3.5	3.6
2004	4	3	93	2.4	3	3	2.4	3.4	2.4	1.6	2.5	2.2	2.5
2004	4	4	94	2.2	2.6	2.9	2.4	3.2	1.7	0.8	1.8	3.2	2.4
2004	4	5	95	2.7	3	3.6	3	4.1	2.2	0.9	2.5	2	2.9
2004	4	6	96	2.8	3.2	3.7	3	4	3	1.8	2.6	3.4	3
2004	4	7	97	3.4	4	4.4	3.8	5.4	4	2.5	3	3.8	3.7
2004	4	8	98	3.6	4.2	4.4	3.9	5.4	3.7	3.1	3.2	3.8	3.8
2004	4	9	99	2.2	2.9	2.8	2	2	2.6	3.6	3.5	4.7	2.5
2004	4	10	100	-999	-999	-999	-999	-999	-999	4	3.8	5.6	-999
2004	4	11	101	4.4	4.9	5.6	4.4	6.1	5.9	4.1	3.6	6.3	4.8
2004	4	12	102	4.5	5.2	6.1	5.1	6.9	6.9	4.7	3.6	6.6	4.7
2004	4	13	103	4.7	5.5	6.4	5.4	7.3	7.4	5	4.1	6.6	5
2004	4	14	104	4.1	4.5	5.2	4	4.8	5.9	5.4	3.7	5.2	4.5
2004	4	15	105	2.8	3	3.3	2.4	2.4	3.2	3.9	3.4	6	3.2
2004	4	16	106	3	3.5	4	3.4	4.3	3.5	2.1	2.8	5.2	3.2
2004	4	17	107	3.4	3.8	4.5	3.7	4.8	3.8	2.1	3.2	3.8	3.8
2004	4	18	108	2.8	3.1	3.5	2.8	3	2.8	2.4	3.1	6	3.2
2004	4	19	109	3.1	3.7	3.8	3.2	4.3	3.1	2.5	3.3	5.6	3.4
2004	4	20	110	2.9	3.7	3.6	3	4.2	3.2	2.5	3.2	3.7	3.2
2004	4	21	111	2.6	3.4	3.4	2.7	3.5	3.3	3	2.8	3.9	2.8
2004	4	22	112	3.9	4.7	4.9	4.2	6.7	5.2	3	3.1	2.2	4.2
2004	4	23	113	4.8	5.5	6.1	4.5	7.7	6.1	2.5	3	3.3	5.5
2004	4	24	114	4	4.9	4.9	4.3	7.4	5.3	2.4	2.7	2.9	4.3
2004	4	25	115	4	4.9	5	4.3	7.3	5.4	2.7	3.2	2.9	4.4
2004	4	26	116	4.2	5.2	5.2	4.5	7.7	6.3	3.4	4	3.5	4.5
2004	4	27	117	4.3	5.4	5.4	4.9	8.1	6.9	4.4	4	3.8	4.5
2004	4	28	118	5	5.9	6	5.1	8.4	7.2	4.7	3.5	5.9	5.4
2004	4	29	119	5	5.5	6.2	4.7	7.3	6.2	3.4	3.7	4.7	5.6
2004	4	30	120	3.6	4.3	4.6	3.7	5.3	4.6	2.9	3.3	3.7	4
2004	5	1	121	4.2	5	5.3	4.6	7.1	5.8	3.1	3.6	2.6	4.5
2004	5	2	122	4.1	4.9	5.4	4.6	6.6	5.9	3.5	4	3.1	4.4
2004	5	3	123	3.8	4.5	5	3.8	5.6	5.4	3.2	3.6	2.2	4.2
2004	5	4	124	4.1	4.9	5.4	4.6	6.8	5.5	2.9	2.7	1.8	4.4
2004	5	5	125	3.1	3.6	4	3.6	4	4	3.6	3.9	1.8	3.2
2004	5	6	126	2.8	3.2	3.5	3.4	3.1	3.2	4.2	2.6	4.6	2.9
2004	5	7	127	4.3	4.8	5.5	5	5.6	5.5	5	4.3	3.9	4.4
2004	5	8	128	4.4	5	5.7	5.1	5.7	5.7	5.3	3.5	5.1	4.6
2004	5	9	129	4.6	5.3	6.2	5.3	6.6	6.5	4.7	4.1	4.4	4.9
2004	5	10	130	3.4	3.6	3.9	3	3	4.4	5.6	5	4.6	3.7
2004	5	11	131	4.4	4.9	5.7	4.6	5.8	6.1	4.8	4.7	4.8	4.8
2004	5	12	132	3.5	4	4.3	3.1	3.7	4.5	4	3.5	4.7	3.9
2004	5	13	133	3.7	4.2	4.6	3.4	4.4	4.6	3.4	4	2.8	4.2
2004	5	14	134	4.3	5	5.8	4.7	6	6.2	4.3	4.2	6.3	4.7
2004	5	15	135	3.4	4	4.4	3.5	4.3	4.6	3.6	4.2	5	3.7
2004	5	16	136	4.2	5.1	5.5	4.8	7	6	3.5	3.7	4.1	4.4
2004	5	17	137	3.9	4.7	5.2	4.5	6.2	5.5	3.1	3.5	2.8	4.2
2004	5	18	138	4.7	5.6	5.8	5.3	8	6.3	3.5	4	2.5	4.9
2004	5	19	139	2.8	3.7	3.6	2.9	3.4	3.7	4.1	3.6	4.1	3.1
2004	5	20	140	2.5	3	3.2	2.5	2.5	3	3.2	3.4	4.3	2.7
2004	5	21	141	4.7	5.6	5.9	5.3	8	6.8	3.7	4.4	4.8	5
2004	5	22	142	5.4	6.2	6.5	5.3	8.6	7.9	4.4	4.4	5.1	5.9
2004	5	23	143	5.1	6	6.4	5.7	8	7.5	5.6	4.9	5.9	5.3
2004	5	24	144	3.3	4.3	4.3	3.3	4.1	5.3	6.1	4.7	5.7	3.6
2004	5	25	145	6.1	6.9	7.3	6.2	9.5	9	6.4	5.3	6.2	6.6
2004	5	26	146	6.5	7.4	7.5	6.4	10	9.6	7.3	4.6	5.8	7
2004	5	27	147	5.7	6.6	7	5.7	8.4	8.9	7.2	4.6	8.1	6.3
2004	5	28	148	5.7	6.6	7.1	6.1	9.1	8.7	5.5	5.5	7.6	6.2
2004	5	29	149	4.7	5.6	5.8	5	7.3	6.6	4.7	4.4	4.6	5
2004	5	30	150	4.4	5.3	5.5	4.5	6.4	6.6	5.4	4.6	6.3	4.8
2004	5	31	151	5.4	6.3	7.1	6	8.3	8.7	6.1	5.3	5	5.8
2004	6	1	152	5.4	6.3	6.9	6	8.6	8.3	5.1	5	6	5.7
2004	6	2	153	5.2	6.1	6.2	5.7	8.6	7.2	5.1	5	7.3	5.5
2004	6	3	154	5.7	6.7	7	6.3	9.4	8.5	5.7	4.8	3.5	6
2004	6	4	155	5.8	6.8	7.3	6.4	9.3	9	5.9	5.1	5.5	6.2
2004	6	5	156	6.1	7	7.4	6.2	9.8	9.8	6.3	5.4	6.4	6.7
2004	6	6	157	6.7	7.4	8	6.4	9.6	10	7.3	5.6	7.6	7.5
2004	6	7	158	6.8	7.5	8.1	6.7	9.8	9.8	7.2	5.8	10.9	7.5
2004	6	8	159	5.6	6.3	6.6	5.4	7.8	7.6	6	5.5	10.6	6.2
2004	6	9	160	5.8	6.4	7.2	5.8	8.5	8.2	5	5.5	10.3	6.4
2004	6	10	161	5.9	6.6	7.4	6	8.9	8.9	5.6	5.1	7.2	6.4
2004	6	11	162	6.3	6.8	7.8	6	8.9	8.8	5.3	5.3	5.8	7
2004	6	12	163	5.9	6.7	6.8	5.7	9.3	8.8	5.6	5.7	5.9	6.5
2004	6	13	164	5.9	6.9	7	6.2	9.8	9.4	6.6	6.4	6.8	6.3
2004	6	14	165	6.1	7.2	7.3	6.5	10.2	10.3	7.4	5.9	7.1	6.5
2004	6	15	166	6.3	7.2	7.5	6.2	9.9	10.4	7.3	6.1	7.7	6.9
2004	6	16	167	6.8	7.5	7.6	6.1	9.7	9.8	7.2	5.7	8.3	7.6
2004	6	17	168	6.5	7.2	7.3	5.8	9.5	9.1	6.7	5.6	8.1	7.2
2004	6	18	169	7	7.3	7.5	5	8.3	9.4	7.1	5.9	7	8.2
2004	6	19	170	7.5	8	8.8	6.6	10.3	11.4	7.9	6.1	9.2	8.5
2004	6	20	171	7	7.8	8.2	6.5	10.4	11.1	7.8	4.9	9.1	7.8
2004	6	21	172	7	7.7	7.9	6.3	10.5	10.9	7.5	6	8.3	7.8
2004	6	22	173	6	7.2	7.1	6.4	10	10.1	8.3	5.7	8	6.3
2004	6	23	174	6.5	7.3	7.5	6.1	9.8	10.4	7.9	5.9	8.5	7.1
2004	6	24	175	6.4	7.3	7.4	6.1	9.8	10.2	7.7	5.3	6.8	7
2004	6	25	176	7.2	7.8	8	6	10.2	10.7	7.6	5.1	5.7	8.2
2004	6	26	177	6.6	7.2	8.2	6.4	9.1	10	7.2	5.2	6.6	7.3
2004	6	27	178	6.4	7.3	7.8	6.4	9.8	10.8	7.6	5.8	6.2	7
2004	6	28	179	7.1	7.8	8	6	10.3	11.7	8	6.1	6.6	8.1
2004	6	29	180	6	6.9	7	5.7	9.7	9.5	6.1	5	7.9	6.7
2004	6	30	181	6.9	7.5	7.6	6	10.3	10.3	6.3	6.5	8	7.8
2004	7	1	182	7	7.7	7.9	5.7	9.9	11	7.8	5.8	7.7	8
2004	7	2	183	7.1	7.6	8.2	6.1	10	10.8	6.7	6.2	8.8	8
2004	7	3	184	7.3	7.8	8.5	6.4	10.2	11.5	7.8	7	9.2	8.3
2004	7	4	185	6.5	7.6	7.7	5.9	10.7	11.8	8.9	6.4	9	7.2
2004	7	5	186	6.7	7.6	7.7	6.3	10.5	10.8	8.5	6.3	9.3	7.3
2004	7	6	187	7.6	8.2	8.4	6.5	10.7	11.5	8.6	5.8	9	8.6
2004	7	7	188	8.5	8.8	9.1	6.3	11	12.8	8.9	5.9	8	9.9
2004	7	8	189	7.1	8	8.2	6	10.9	12.4	9.5	6.2	9.1	8
2004	7	9	190	3.8	4.9	4.8	2.9	3.4	5.5	8.6	4.6	10.8	4.3
2004	7	10	191	7.1	7.7	7.9	5.7	9.9	10.7	7.7	5.9	9.2	8.2
2004	7	11	192	7	7.4	7.9	5.7	9.5	10.5	6.7	6.3	10.5	8.1
2004	7	12	193	6.7	7.4	8.3	6.5	9.5	10.9	7.6	6.4	11.1	7.4
2004	7	13	194	7.1	7.6	9	6.8	9.5	11.2	7.9	6.4	11.7	8
2004	7	14	195	8	8.2	10.1	7	10	12.5	8.1	6.2	11.8	9.2
2004	7	15	196	8.1	8.4	9	6.2	10.8	12.6	8.1	5.5	10.5	9.4
2004	7	16	197	7.7	8.1	9	6.3	10.3	12	7.5	5.7	10.8	8.9
2004	7	17	198	7.4	8	8.4	6.3	10.4	11.9	8.4	6.2	11.2	8.4
2004	7	18	199	6.6	7.6	8	6.4	10	11.5	8.7	5.8	10.7	7.3
2004	7	19	200	5.9	6.9	7.5	6.4	9.2	10	7.3	6.5	9.9	6.3
2004	7	20	201	5.9	7	7.2	6	9.6	10.4	7.8	6.1	9.9	6.4
2004	7	21	202	6.2	7.2	7.4	5.6	10	11.1	8.5	5.6	10.5	6.9
2004	7	22	203	6.7	7.5	7.6	5.8	10	10.9	8.2	5.5	9.5	7.5
2004	7	23	204	5.7	6.9	6.9	5.9	9.5	9.9	7.8	6	9.9	6.2
2004	7	24	205	5.9	6.8	6.8	6.1	9.1	8.6	7.4	5.9	8.4	6.3
2004	7	25	206	4.9	6	6	4.7	7.2	8.3	7.4	5	8.4	5.4
2004	7	26	207	5.8	7	7	5.9	9.9	10.3	7.9	5.4	9.3	6.2
2004	7	27	208	6.6	7.4	7.6	5.4	10.2	11.3	8.3	5.9	9.5	7.5
2004	7	28	209	4.9	5.7	5.6	3.9	5.3	7.1	8.6	6.1	8.7	5.6
2004	7	30	211	5.2	6.5	6.4	5.4	8.5	9.6	9.2	6.2	9.6	5.5
2004	7	31	212	3	4.3	4	2.5	2.4	5	9.6	5.6	11.1	3.3
2004	8	1	213	5.9	6.8	6.9	5.1	8.4	10.5	9.6	6.1	11.2	6.6
2004	8	2	214	7.1	7.7	8.2	5.9	9.9	11.8	8.6	5.1	11	8.1
2004	8	3	215	6.4	7	7.2	5.6	9.4	9.1	6.5	5.2	9.8	7.2
2004	8	4	216	6.2	7	7.1	5.7	9.7	9.8	7.3	5.8	9.8	6.8
2004	8	5	217	4.3	5	4.9	2.8	3.4	5.5	8.4	5.7	9.5	5
2004	8	6	218	4.8	5.1	5	3	3.4	5.6	8.7	5.9	8.8	5.7
2004	8	7	219	4	4.7	4.8	3.3	3.8	5.8	8.3	6.2	9.8	4.5
2004	8	8	220	6	6.6	7.3	5.8	7.8	9	8.7	6	10.3	6.5
2004	8	11	223	5.1	6.1	6.3	5.1	7.7	8.6	7.9	4.6	7.3	5.5
2004	8	12	224	5	5.8	6	4.8	7.3	7.3	6.4	5.1	6.9	5.5
2004	8	13	225	5	5.8	6.2	5	7.1	7.6	6.5	5.5	7.7	5.5
2004	8	14	226	5	6	6.1	5	7.8	8.4	7.2	5	8.5	5.4
2004	8	15	227	5	6	6.1	4.7	7.3	8.5	7.7	5.2	8.4	5.5
2004	8	16	228	5.8	6.4	6.8	5.1	7.6	8.8	7.9	5.4	8.6	6.5
2004	8	17	229	5.6	6.3	6.4	4.5	7.3	8.4	7.3	4.8	8.3	6.4
2004	8	18	230	5.8	6.5	7.1	5.5	8.2	9.2	7.4	4.7	8.2	6.4
2004	8	19	231	5.2	6	6.5	5.6	7.5	7.7	7.2	5.7	8.7	5.5
2004	8	20	232	5.1	5.9	6.6	5.6	7.3	8.2	7.2	5.4	9.3	5.4
2004	8	21	233	4.8	5.8	6.1	4.9	7.8	8.3	6.5	4.3	7.9	5.2
2004	8	22	234	5.5	6.3	6.7	4.8	7.9	9.2	7	4.7	5.6	6.2
2004	8	23	235	5.6	6.5	6.6	4.8	8.7	9.2	7.4	4.5	6.1	6.3
2004	8	24	236	5	6.1	6.3	5.2	7.8	8.6	7.7	4.8	6.4	5.4
2004	8	25	237	5.1	6.1	6.4	5.2	7.9	9	7.8	5.4	6.3	5.5
2004	8	26	238	5.1	6.1	6.4	5.2	7.7	8.8	7.8	5.6	6.8	5.5
2004	8	27	239	4.7	5.8	6.1	5	7.5	8.6	7.4	4.7	6.9	5.1
2004	8	28	240	4.7	5.8	6.3	5.1	7.3	8.6	7.4	4.9	5.9	5.1
2004	8	29	241	4.8	5.7	6.2	4.9	7.3	8.4	7.2	4.6	7.1	5.2
2004	8	30	242	4.7	5.8	6.2	5.1	7.6	8.6	7.1	4.7	8.5	5.1
2004	8	31	243	4.5	5.6	5.6	4.3	7.3	8.2	7.1	4.6	8	5
2004	9	1	244	4.5	5.7	5.7	4.4	7.7	8.7	7.6	4.9	6.8	4.9
2004	9	2	245	5	6	6.3	4.9	8.1	9	7.3	4.2	7.4	5.5
2004	9	3	246	4.6	5.6	5.8	4.6	7.4	8.1	6.9	4.6	7.1	5
2004	9	4	247	5.1	6.1	6.5	5	8.1	9.2	7.1	4.4	6.7	5.6
2004	9	5	248	4.8	5.9	6	4.5	8.4	9.1	7	4.6	7.2	5.4
2004	9	6	249	5.2	5.9	6.1	4	8.2	8.7	6.1	5	7.9	6
2004	9	7	250	5.4	6	6.2	4	7.9	8.8	5.7	4.2	6.3	6.3
2004	9	8	251	5.5	6.1	6.3	4.2	7.9	9.1	6.8	4.8	5.9	6.4
2004	9	9	252	4.7	5.7	5.9	4.4	7.5	8.7	7.3	4.4	5.7	5.2
2004	9	10	253	4.1	5.1	5.3	4.1	7.1	7.3	5.1	3.8	6.8	4.5
2004	9	11	254	3.9	4.7	5.3	4.4	6.2	6.6	4.9	4.3	7.6	4.1
2004	9	12	255	3.7	4.5	5	4	6.3	6.2	4	4	6.9	4
2004	9	13	256	4.3	4.9	5.6	4.2	6.6	7.3	4.6	4.3	6	4.8
2004	9	14	257	3.8	4.7	5.2	4.3	6.4	6.9	5.3	4.1	5.8	3.9
2004	9	15	258	4.1	4.9	5.4	4.4	6.5	7.1	5.6	4.2	5.3	4.4
2004	9	16	259	4.7	5.3	5.9	4.3	6.7	7.6	5.6	4.2	7.2	5.3
2004	9	17	260	3.5	4.6	4.8	4	5.9	6.9	6.3	4.1	7.1	3.6
2004	9	18	261	3.2	4.3	4.2	3.3	5.3	5.8	6	4.3	6.5	3.5
2004	9	19	262	3.7	4.8	4.8	3.7	6.7	7.1	6.1	4.1	5.7	4
2004	9	20	263	3.5	4.7	4.6	3.7	6.4	7	6.1	3.7	6.2	3.7
2004	9	21	264	3.7	4.8	4.8	3.8	6.5	7	6.1	3.7	5.8	4
2004	9	22	265	3.7	4.6	4.7	3.5	5.4	6.2	6.3	3.6	5.7	4
2004	9	23	266	4.3	4.8	5.4	4.1	6.1	6.4	5.3	3.7	5	4.8
2004	9	24	267	4.2	4.9	5.2	4	6.5	6.9	6.1	4.2	4.7	4.6
2004	9	25	268	3.6	4.7	4.7	3.9	6.6	6.8	6.3	4.4	5	3.9
2004	9	26	269	3.8	4.8	5	4.1	6.5	7.1	6.5	4.6	5.7	4
2004	9	27	270	3.5	4.6	4.6	3.8	6.2	6.5	6.5	3.8	5.8	3.7
2004	9	28	271	3.8	4.8	4.9	4.1	6	6.6	6.9	4.5	6.9	4.1
2004	9	29	272	3.9	4.7	5.1	4.3	5.9	6.9	6.7	3.7	7.5	4.1
2004	9	30	273	3.3	4.3	4.3	3	5.1	6.2	6.2	4.2	5.4	3.7
2004	10	1	274	2.6	3.8	3.6	2.5	3.9	5	5.9	3.5	5.3	2.8
2004	10	2	275	2.8	3.7	3.7	2.9	4.6	4.7	5	3.2	5.3	3
2004	10	6	279	2.3	3.3	3.1	1.8	2.3	3.5	5.1	3.4	4.6	2.6
2004	10	7	280	2.1	3.4	3.1	2	2.9	4.1	5.6	3.1	4.5	2.3
2004	10	8	281	2.9	4	3.9	2.9	6	6.2	5	3.3	4.5	3.1
2004	10	9	282	3.4	4	4.3	3.1	5.6	5.6	4.4	2.5	4.8	3.7
2004	10	10	283	2.7	3.5	3.6	2.6	5	4.5	3.5	2.7	4.8	3
2004	10	11	284	2.8	3.6	3.6	2.7	5.2	4.9	4.1	3	4.1	3
2004	10	12	285	2.7	3.6	3.6	2.6	5.2	5.2	4.2	2.3	4.1	2.9
2004	10	13	286	2.4	3.3	3.3	2.1	4.7	4.7	3.2	2.1	2.8	2.7
2004	10	14	287	3	3.7	3.8	2.1	4.8	5.4	3.7	2.8	2.3	3.6
2004	10	15	288	3.4	4	4.1	2.2	5.1	5.8	4.1	2.8	2.7	4
2004	10	16	289	3.3	3.9	4	2.3	5	5.4	4.4	2.5	4	3.8
2004	10	17	290	2.1	3	3	1.9	2.9	3.6	4.3	2.4	3.3	2.4
2004	10	18	291	2.7	3.5	3.6	2.4	4.7	5.1	4.4	2.5	3.4	3.1
2004	10	20	293	2.5	3.2	3.4	2.8	4.2	4.7	4.7	2.4	5.2	2.6
2004	10	21	294	2.2	2.7	2.8	2.5	3.7	2.8	3	2.7	5.4	2.3
2004	10	22	295	1.9	2.3	2.5	2.3	3.1	2.4	2.2	2.1	3.2	1.9
2004	10	23	296	2	2.2	2.3	2.4	2.6	2	2.8	2.4	7.4	2
2004	10	24	297	1.4	1.8	1.8	1.7	1.5	1.9	3.3	2.3	5.6	1.5
2004	10	25	298	1.8	2.2	2.2	2	2.1	2.4	3.8	2.4	5.1	1.9
2004	10	26	299	-999	-999	-999	-999	-999	-999	4	2.3	4.8	-999
2004	10	27	300	-999	-999	-999	-999	-999	-999	4.3	2.5	4.9	-999
2004	10	28	301	2.1	2.9	3.1	2.2	3.8	4.7	4.3	2.2	4.2	2.3
2004	10	29	302	2.1	2.8	3	2.3	3.6	4.5	4	1.7	3.6	2.2
2004	10	30	303	1.9	2.4	2.7	2	3.2	3.8	3.1	2	2.5	2.1
2004	10	31	304	1.9	2.3	2.6	1.8	2.9	3.5	2.7	1.7	2	2.2
2004	11	1	305	2	2.5	2.7	1.8	3.2	3.5	3	2.1	-999	2.2
2004	11	2	306	2.4	2.8	3	1.6	3.3	3.6	3	1.8	-999	2.8
2004	11	3	307	1.9	2.3	2.5	1.7	3	3.2	2.6	2	-999	2.1
2004	11	4	308	1.4	2	2.1	1.5	2.8	2.6	2.1	1.5	-999	1.5
2004	11	5	309	1.3	1.9	2	1.4	2.7	2.2	1.8	1.7	-999	1.4
2004	11	6	310	1.7	2.1	2.3	1.4	2.9	2.7	1.8	0.9	-999	1.9
2004	11	7	311	1.4	1.9	1.9	1.1	1.3	1.9	2.1	1.4	-999	1.6
2004	11	8	312	2	2	2.2	0.9	0.1	1	2.4	1.8	-999	2.4
2004	11	9	313	1.1	1.7	1.7	1	0.8	1.4	2.1	1.4	-999	1.3
2004	11	10	314	2	2.2	2.4	1.2	1.9	2.8	2.4	1.7	-999	2.4
2004	11	11	315	1.8	2.2	2.5	1.6	3.1	3.6	2.6	1.6	-999	2
2004	11	12	316	1.4	1.9	2	1.6	2.9	2.8	2.4	1.6	-999	1.5
2004	11	14	318	1.3	2.2	2.2	1.1	3.4	3.8	2.7	1.5	-999	1.5
2004	11	15	319	1.1	2	2	1.2	2.8	3	2.6	1.7	-999	1.2
2004	11	16	320	1	1.7	1.6	1	1.5	1.6	1.8	1.2	-999	1.1
2004	11	17	321	1	1.4	1.5	1.1	2.1	1.8	1.5	0.7	-999	1
2004	11	18	322	0.9	1.3	1.4	1	1.7	1.4	1.2	0.9	-999	0.9
2004	11	19	323	1.2	1.6	1.7	1	1.9	2.1	1.5	1.4	-999	1.3
2004	11	20	324	1.2	1.6	1.8	1.1	2.6	2.7	1.5	1.1	-999	1.4
2004	11	21	325	1.1	1.7	1.7	0.8	2.5	2	1.3	0.8	-999	1.2
2004	11	22	326	1	1.4	1.4	0.8	1.7	1	1	1.1	-999	1.1
2004	11	23	327	0.7	1	1	0.8	1.1	0.4	0.6	0.8	-999	0.7
2004	11	24	328	0.7	1.1	1	0.7	1.1	0.4	0.6	0.9	-999	0.8
2004	11	25	329	0.6	0.9	0.9	0.7	0.7	0.2	0.6	0.7	-999	0.7
2004	11	26	330	0.5	0.7	0.7	0.6	0.3	0	0.5	0.7	-999	0.6
2004	11	27	331	0.7	0.9	1	0.6	0.7	0.2	0.5	0.6	-999	0.7
2004	11	28	332	0.8	1	1.1	0.6	0.2	0.1	0.5	0.9	-999	0.9
2004	11	29	333	0.7	1.1	1.1	0.6	1.7	0.5	0.5	0.6	-999	0.8
2004	11	30	334	1	1.3	1.4	0.6	1.8	0.8	0.5	0.7	-999	1.2
2004	12	1	335	1	1.3	1.4	0.6	0.8	0.5	0.6	0.8	-999	1.2
2004	12	2	336	1	1.3	1.3	0.6	0.9	0.6	0.6	0.8	-999	1.2
2004	12	3	337	1	1.4	1.5	0.6	1.4	1.1	0.8	0.9	-999	1.2
2004	12	4	338	1.8	2	2.1	0.7	0	0.4	1	1.1	-999	2.3
2004	12	5	339	2	2.1	2.3	0.6	2.5	2.4	1.2	1.1	-999	2.6
2004	12	6	340	1	1.4	1.4	0.6	0.9	0.7	0.9	0.8	-999	1.2
2004	12	7	341	0.8	1.4	1.3	0.7	0.2	0.5	1	0.9	-999	0.9
2004	12	8	342	0.6	1.2	1.1	0.6	1.5	0.8	0.9	0.8	-999	0.7
2004	12	9	343	0.7	1.1	1.2	0.6	1.9	1.2	0.9	0.8	-999	0.8
2004	12	10	344	0.6	1	1	0.6	0	0.1	0.6	0.8	-999	0.7
2004	12	11	345	0.7	1	1	0.6	0.4	0.3	0.5	0.6	-999	0.8
2004	12	12	346	0.6	0.8	0.8	0.5	0	0	0.4	0.7	-999	0.7
2004	12	13	347	0.6	0.8	0.8	0.6	0.3	0	0.5	0.7	-999	0.7
2004	12	14	348	0.6	0.8	0.8	0.6	0.1	0.1	0.6	0.8	-999	0.6
2004	12	15	349	0.5	0.8	0.8	0.5	0.1	0	0.4	0.7	-999	0.6
2004	12	16	350	0.7	0.9	1	0.5	1.2	-0.2	0.2	0.6	-999	0.8
2004	12	17	351	0.9	1.1	1.1	0.4	1	0	0.2	0.6	-999	1.1
2004	12	18	352	1.2	1.3	1.5	0.5	1.8	0.9	0.5	0.8	-999	1.4
2004	12	19	353	0.7	1	1.1	0.5	1.8	0.6	0.5	0.7	-999	0.8
2004	12	20	354	0.6	1	1	0.5	1.5	0.5	0.5	0.4	-999	0.7
2004	12	21	355	0.7	1.3	1.3	0.4	2.3	1.4	0.9	0.9	-999	0.9
2004	12	22	356	0.6	1.2	1.2	0.5	2.1	1.2	1	1	-999	0.7
2004	12	23	357	0.6	1.2	1.2	0.5	2.1	1.3	0.9	0.8	-999	0.7
2004	12	24	358	0.6	1.2	1.2	0.5	1.9	1.2	1	0.7	-999	0.6
2004	12	25	359	0.6	1.1	1.1	0.6	1.2	0.6	0.8	0.6	-999	0.7
2004	12	26	360	0.7	1	1.1	0.7	1.4	0.8	1.1	1	-999	0.7
2004	12	27	361	0.7	1.1	1.1	0.7	1.8	0.9	1.2	1.1	-999	0.8
2004	12	28	362	0.8	1	1	0.8	1	0.8	1.4	1.3	-999	0.9
2004	12	29	363	0.7	0.9	0.9	0.7	0	0.4	1.7	1.2	-999	0.8
2004	12	30	364	0.7	0.9	0.9	0.7	0	0.4	1.6	1.2	-999	0.7
2004	12	31	365	-999	-999	-999	-999	-999	-999	1.8	1.3	-999	-999
2005	1	1	1	1	1.2	1.2	1	1.9	1.5	1.8	1.3	-999	1.1
2005	1	9	9	1.1	1.4	1.4	0.6	1.1	0.7	0.7	0.8	-999	1.4
2005	1	12	12	0.6	0.7	0.7	0.7	0.6	0.1	0.7	1	-999	0.7
2005	1	13	13	0.7	0.9	0.9	0.8	0.5	0.4	1.2	1.1	-999	0.8
2005	1	14	14	0.7	1.1	1.1	0.8	1	0.7	1	1	-999	0.8
2005	1	18	18	0.9	1.2	1.3	1	2.2	1.2	0.9	0.9	-999	1
2005	1	19	19	0.8	1.2	1.3	0.9	2.4	1	0.6	0.7	-999	0.9
2005	1	20	20	0.9	1.3	1.5	1	3.1	1.4	0.7	0.7	-999	1
2005	1	21	21	1	1.2	1.4	1.1	2.5	0.9	0.8	0.9	-999	1.1
2005	1	22	22	0.8	1	1	0.7	0.1	0.2	0.7	0.8	-999	0.8
2005	1	23	23	1	1.2	1.3	0.7	0.4	0.5	0.8	0.9	-999	1.1
2005	1	24	24	1.1	1.4	1.6	1.1	3.5	1.1	0.6	0.8	-999	1.2
2005	1	25	25	1	1.4	1.5	1	3.4	1.1	0.6	1	-999	1.1
2005	1	26	26	0.9	1.4	1.4	1	2.4	1	0.7	1	-999	1
2005	1	27	27	1.2	1.5	1.7	1.2	2.8	1.4	0.8	0.7	-999	1.3
2005	1	28	28	1.4	1.6	1.9	1.4	3.3	1.5	0.9	1.2	-999	1.5
2005	1	29	29	0.9	1.1	1.1	0.8	0.5	0.5	1.2	1	-999	1
2005	1	30	30	1.1	1.3	1.4	1.3	1.7	0.9	1.3	1	-999	1.2
2005	1	31	31	1.1	1.3	1.4	1.6	2.1	0.6	1.3	1.1	-999	1.1
2005	2	1	32	1.5	1.8	2.1	1.9	4	1.1	0.8	0.9	-999	1.6
2005	2	2	33	1.3	1.7	1.9	1.5	3.5	1.2	0.7	0.9	-999	1.4
2005	2	3	34	1.2	1.5	1.7	1.2	2.4	1	0.7	0.9	-999	1.3
2005	2	4	35	1.6	1.9	2.3	2.1	4.3	1.3	0.8	0.7	-999	1.7
2005	2	5	36	1.5	1.8	2.1	1.9	4	0.8	0.5	0.7	-999	1.6
2005	2	6	37	1.6	2	2.3	1.8	4.6	1.3	0.6	0.8	-999	1.7
2005	2	7	38	1.6	2	2.2	1.7	4.5	1.3	0.5	1	-999	1.8
2005	2	8	39	1.5	1.8	2.1	1.9	3.9	0.6	0.4	0.8	-999	1.6
2005	2	9	40	1.4	1.5	1.8	1.9	2.9	-0.9	0.2	0.5	-999	1.4
2005	2	13	44	1.4	1.7	1.9	1.9	3	0	0.3	0.8	-999	1.5
2005	2	14	45	1	1.1	1.2	1.2	1.4	0	0.4	0.9	-999	1
2005	2	15	46	1.7	2.1	2.4	2.3	3.8	0.6	0.6	1.2	-999	1.8
2005	2	16	47	2.3	2.6	3.1	2.9	4.7	1.9	1.3	1.7	-999	2.4
2005	2	21	52	1.8	2.1	2.4	1.9	3	2	1.2	1.2	-999	1.9
2005	2	22	53	2.6	3.1	3.9	2.8	5.7	3.3	1.1	1.5	-999	2.9
2005	2	23	54	2.6	3.1	3.5	2.9	5.8	3.1	1.3	1.8	-999	2.8
2005	2	24	55	2.9	3.4	3.9	3.1	6.2	3.3	1.6	1.8	-999	3.2
2005	2	26	57	2.9	3.5	4.4	3.3	5.5	3.7	1.7	2	-999	3.3
2005	2	27	58	2.5	3	3.6	2.9	5.1	3.4	1.5	1.1	-999	2.7
2005	2	28	59	2.9	3.5	3.9	3.4	6.4	4	1.9	1.7	-999	3.1
2005	3	1	60	2.8	3.1	3.6	3.5	5.1	2.7	1.5	1.5	-999	2.8
2005	3	3	62	3.1	3.6	4.1	3.9	5.5	3.4	2.2	1.2	-999	3.2
2005	3	4	63	2.8	3.3	3.8	3.3	5.5	3.7	1.6	1.7	-999	2.9
2005	3	5	64	2.6	3.3	3.5	3	6.1	3.6	1.4	2	-999	2.8
2005	3	6	65	2.5	3.1	3.4	2.9	5.4	3.3	1.5	1.3	-999	2.6
2005	3	7	66	2.8	3.5	3.7	2.9	6.2	4.2	1.8	2.2	-999	3
2005	3	8	67	2.7	3.4	3.5	3	6.2	3.8	1.6	1.3	-999	2.8
2005	3	9	68	3.2	3.8	4.2	3.2	6.5	4.3	1.6	1.3	-999	3.5
2005	3	10	69	2.7	3.3	3.6	3	5.8	3.2	1.3	1.4	-999	2.9
2005	3	11	70	2.7	3.3	3.5	2.9	5.5	2.8	1.1	1.4	-999	2.9
2005	3	12	71	2.6	3	3.6	3.1	4.8	2.5	1	1.3	-999	2.7
2005	3	13	72	2.6	3	3.5	3.4	4.4	2	1.2	1.9	-999	2.7
2005	3	14	73	2.6	3.1	3.6	3.3	4.6	2.4	1.2	1.7	-999	2.8
2005	3	15	74	2.7	3.1	3.6	3.4	4.7	2.5	1.3	2.1	-999	2.8
2005	3	16	75	2.8	3.2	3.7	3.3	4.8	3	1.5	2.1	-999	2.9
2005	3	17	76	2.7	3.3	3.6	3.1	5.2	3.2	1.4	2.2	-999	2.9
2005	3	18	77	3.1	3.7	4.1	3.6	5.8	3.7	1.9	2.5	-999	3.3
2005	3	19	78	3.2	3.6	4.2	3.8	5.1	3.7	2.2	2.3	-999	3.3
2005	3	20	79	3	3.5	4.1	3.8	4.8	2.7	1.8	2.2	-999	3.1
2005	3	22	81	3.2	3.7	4.6	3.7	5.3	3.8	1.8	2.2	-999	3.5
2005	3	23	82	3	3.5	4	3.2	5.3	3.1	1.3	2	-999	3.2
2005	3	24	83	2.4	3	3.6	2.9	4.2	1.8	0.7	1.7	-999	2.7
2005	3	25	84	2.6	3	3.7	3.1	4.3	2.2	0.9	1.9	-999	2.8
2005	3	26	85	3	3.5	4.1	3.2	5.1	3.2	1.3	2.4	-999	3.3
2005	3	27	86	3.2	3.8	4.2	3.6	5.7	3.6	1.9	2.7	-999	3.5
2005	3	28	87	3.5	4	4.7	4.1	5.5	4	2.4	2.5	-999	3.7
2005	3	29	88	3.4	3.7	4.3	4.3	4.6	2.9	2.7	3	-999	3.5
2005	3	30	89	3.8	4.2	4.8	4.6	5.3	4.1	3.3	3.1	-999	3.9
2005	3	31	90	3.6	4.1	4.8	4.2	5.2	4.2	2.9	3	-999	3.9
2005	4	1	91	3.7	4.3	5.2	4.2	5.4	4.4	2.9	2.3	1.3	4
2005	4	2	92	3.1	3.6	4.1	3.9	4.5	3	2.3	2.5	2.4	3.3
2005	4	3	93	3.1	3.6	4.3	3.7	4.9	3	1.6	1.9	1.6	3.3
2005	4	4	94	2.9	3.3	3.9	3.6	4.4	2.5	1.4	2.1	1.3	3
2005	4	5	95	3	3.4	4	3.6	4.6	2.9	1.6	2.5	2.8	3.1
2005	4	6	96	2.8	3.2	3.7	3.2	3.9	3	2	2.6	2.7	3
2005	4	7	97	3.7	4.2	4.7	3.6	5.6	4.1	2.1	2.9	2.7	4.1
2005	4	8	98	3.7	4.3	5	4.2	5.6	5.1	3	3	3.7	4
2005	4	9	99	3.5	4.2	4.5	3.9	5.8	4.2	2.6	2.7	3.4	3.7
2005	4	10	100	3.7	4.2	4.9	4.3	5.5	4.4	3	3.6	2.8	3.9
2005	4	11	101	2.5	2.9	3.1	2.8	2.7	2.9	3.8	3.4	4.1	2.6
2005	4	12	102	3.5	3.8	4.3	4.1	4.1	3.6	4.3	3.9	7.2	3.6
2005	4	13	103	4	4.5	5.2	4.4	5.4	5.5	4.7	3.4	5.5	4.2
2005	4	14	104	4.1	4.7	5.3	4.2	5.6	5.7	4.5	2.5	8.1	4.4
2005	4	15	105	3.6	4.3	4.6	3.8	5.5	4.7	3.3	3.1	3.6	3.9
2005	4	16	106	3	3.7	3.8	3.2	4.5	3.4	2.1	3	3.4	3.3
2005	4	17	107	4	4.5	4.8	3.5	5.2	4.6	2.9	3.4	2.3	4.6
2005	4	18	108	3.1	3.6	4	3.2	3.7	3.8	3.5	3.5	2.6	3.4
2005	4	19	109	3.9	4.4	5.1	4.5	5	4.7	4.4	3.8	7.2	4.2
2005	4	20	110	3.4	3.9	4.5	3.8	4.7	4.5	3.1	3.6	5.2	3.6
2005	4	21	111	3.3	3.8	4.3	3.6	4.2	4.3	3.7	3.8	2.9	3.5
2005	4	22	112	3.6	3.9	4.4	4.5	4	3.4	4.7	3.7	4.2	3.7
2005	4	23	113	3.3	3.7	4.1	3.5	3.6	4.2	4.7	4	7.2	3.6
2005	4	24	114	2.7	3.3	3.5	3.2	3.4	3.5	3.5	2.8	4	2.8
2005	4	25	115	3.7	4.1	4.7	3.6	4.7	4.4	3	3.2	1.7	4.1
2005	4	26	116	3.7	4.2	4.6	3.5	4.7	4.6	3.5	3.8	1.4	4.1
2005	4	27	117	3	3.7	3.7	2.9	3.7	3.7	3.3	3.5	2.7	3.3
2005	4	28	118	3.1	3.5	3.5	2.2	2.3	3.1	3.7	3.6	3	3.6
2005	4	29	119	3.3	3.7	4.2	3.4	3.9	4.4	3.6	3.8	4.1	3.5
2005	4	30	120	3.3	4	4.1	3.2	4.1	4.3	4.2	4	4.9	3.6
2005	5	1	121	2.4	2.8	3	2.5	2.3	2.8	3.8	3.3	4	2.6
2005	5	2	122	2.7	3.2	3.4	3.1	3.1	3.1	3.2	3.8	4.1	2.9
2005	5	3	123	2.6	3	3.3	2.7	2.8	2.7	2.3	2.6	3.1	2.8
2005	5	4	124	2.1	2.2	2.4	1.6	1.1	1.8	2.2	2.7	2.5	2.4
2005	5	5	125	3.8	4	4.2	2.5	3.1	3.8	2.6	3.4	2.1	4.6
2005	5	6	126	3	3.4	3.4	2	1.9	2.9	3.5	3.9	2.1	3.5
2005	5	7	127	3.3	3.9	3.9	2.4	2.6	3.9	4.7	4.4	1.1	3.8
2005	5	8	128	3.4	4.2	4.2	2.9	3.4	4.6	5.4	4.5	2.3	3.8
2005	5	9	129	2.9	3.3	3.4	2.7	2.8	3.2	3.8	4.5	5.4	3.2
2005	5	10	130	3.3	3.4	3.8	3	2.8	4.1	5.1	4.4	5.4	3.6
2005	5	11	131	2.9	3.3	3.5	3	2.7	3.8	5.5	4.7	4.9	3.2
2005	5	12	132	3	3.4	3.5	2.6	2.4	3.6	6.2	4.2	5.9	3.4
2005	5	13	133	3.1	2.9	3.1	2	1.4	3.4	6.3	5	5.9	3.7
2005	5	14	134	2.8	3.1	3.3	2.6	2.4	3.5	5	4.7	6.4	3.1
2005	5	15	135	1.6	2	2.1	1.3	0.4	2	4.9	4.9	5.3	1.8
2005	5	16	136	2.9	3.3	3.5	2.6	2.5	3.7	4.7	4.9	6.8	3.2
2005	5	17	137	3	3.8	3.7	2.5	2.5	4	5.7	4.8	4	3.4
2005	5	18	138	4.2	4.4	4.5	2.8	3.3	4.6	5	5.1	4.4	4.9
2005	5	19	139	4	4.4	4.3	2.6	3	4.3	5.1	5.2	5.2	4.7
2005	5	20	140	4	4.3	4.1	2.1	1.9	3.6	5.4	4.9	5.6	4.9
2005	5	21	141	3	3.3	3.4	1.4	0.5	2.6	6.5	5.2	5.9	3.6
2005	5	22	142	3.7	4	4.3	3.2	3.2	5	6.7	5.5	5.6	4.1
2005	5	23	143	1.9	2.2	2.3	1.1	0.1	2.2	6.7	5.7	5.3	2.2
2005	5	24	144	3.7	4	4.4	3.2	3.4	4.9	5.9	4.5	6.3	4.2
2005	5	25	145	3.5	3.9	4.2	3	3.2	4.6	5	4.3	5.1	3.9
2005	5	26	146	2.6	3.2	3.2	2.1	1.8	3.3	5.4	4	4.7	2.9
2005	5	27	147	3.6	4	4.3	3.2	3.3	4.9	6.3	5.3	6	4
2005	5	28	148	5	5.2	5.6	3.6	4.5	6.3	6.4	5.2	6	5.8
2005	5	29	149	3.3	3.1	3.3	1.9	1.5	3.1	4.7	4.7	7.4	3.9
2005	5	30	150	2.4	2.5	2.7	1.6	0.9	2.5	4.8	4.2	5.4	2.9
2005	5	31	151	2.9	3	3.2	2.1	1.7	3.4	5.3	4.8	5.1	3.3
2005	6	1	152	3.2	3.8	3.7	2.2	2	3.6	5.3	4	4.3	3.8
2005	6	2	153	3	3.4	3.4	1.8	1.3	2.8	4.8	4.5	4.6	3.6
2005	6	3	154	2.7	2.9	3	2	1.5	3.1	5.4	5.3	4.1	3.1
2005	6	4	155	3.4	3.8	4.2	3.3	3.6	4.6	4.6	5	6.4	3.8
2005	6	5	156	3.6	4.1	4.5	3.5	4.1	4.7	4	4.3	6.4	4.1
2005	6	6	157	4.8	5	5.9	4.5	5.2	5.9	5	5.4	6.8	5.5
2005	6	7	158	3.9	4.3	4.8	4	4.3	5.3	5.3	5.6	7.2	4.3
2005	6	8	159	1.7	2.2	2.2	1.3	0.4	2.6	6.9	5.9	8.9	1.9
2005	6	9	160	2.2	3	3	1.7	0.9	3.2	7.2	6.3	8	2.5
2005	6	10	161	5.1	5.8	6.6	5.7	6.4	7.9	8.6	5.8	9	5.3
2005	6	11	162	5	5.6	6.4	5.4	5.8	7.3	7.9	5	9.3	5.4
2005	6	12	163	4.5	4.6	5.2	3.8	4	5.7	6.6	5.4	9.2	5.1
2005	6	13	164	4.4	4.8	5.2	4.5	4.6	4.8	6.9	4.9	9	4.8
2005	6	14	165	4.8	5.3	5.9	4.7	5.6	6.4	6.3	5.4	8.4	5.2
2005	6	15	166	2.4	2.9	3	1.8	1.1	3.3	7.8	5.3	7.6	2.7
2005	6	16	167	3.2	3.8	3.8	3.2	3	3.6	6.8	5.2	8.1	3.5
2005	6	17	168	4.6	5.2	5.4	3.9	4.9	6.5	6.9	6.1	5.7	5.2
2005	6	18	169	7.1	7.4	8.5	6.3	9	10	7.3	6.4	7.9	8
2005	6	19	170	6.3	6.6	7.2	5.6	6.9	6.9	7.4	6.4	8.6	7.1
2005	6	20	171	4.6	4.9	5.5	4.1	4.5	6	7.4	5.1	9.6	5.2
2005	6	21	172	6.1	6.7	7.8	6.3	8.5	8.5	5.9	5.2	9.2	6.6
2005	6	22	173	5.9	6.6	7.6	6.7	8.5	8.3	6.2	4.9	9.2	6.2
2005	6	23	174	5.5	6.1	6.6	6.2	7.9	6.3	5.3	5.8	8.9	5.7
2005	6	24	175	6	6.7	7.4	6.2	8.4	8.8	7.1	6.7	8.3	6.5
2005	6	25	176	6.1	6.9	7.9	7	8.5	9.2	7.6	6.1	8.9	6.4
2005	6	26	177	6.2	6.9	8	7.1	8.5	8.6	7.1	5.7	8.6	6.6
2005	6	27	178	5.7	6.1	6.8	5.1	7	8.2	6.5	6.6	7.8	6.4
2005	6	28	179	6.6	6.9	8.4	6.6	8.1	9.3	7.5	6.4	8.9	7.3
2005	6	29	180	7.2	7.6	9.3	6.9	8.5	10.3	8.5	5.8	7.4	8.1
2005	6	30	181	6.1	6.8	7.8	6.2	8.2	9.7	7.6	5	7.8	6.6
2005	7	1	182	4.5	4.8	5.2	3.6	3.9	6.2	8	5.8	6.7	5.2
2005	7	2	183	6.7	7.3	8.5	6.8	8.9	10.4	8.5	6.4	8.7	7.3
2005	7	3	184	6.4	7.4	8.5	7.3	9.3	11	8.9	6.1	10.5	6.8
2005	7	4	185	6.3	6.8	8.1	6.5	7.6	9.4	8.8	5.4	9.5	6.8
2005	7	5	186	6.1	6.7	7.9	6.1	8.3	8.8	6.2	4.7	8.6	6.8
2005	7	6	187	5.9	6.7	7.3	6	8.5	9.2	7.1	5.8	7.9	6.4
2005	7	7	188	6	7	7.5	6.7	9.3	9.7	8	6.3	6	6.3
2005	7	8	189	4.7	5.2	5.9	4.9	5.1	7.1	9.3	6.5	5.3	5.1
2005	7	9	190	7.2	7.9	9.1	7.6	9.5	11	9.3	6.7	8.5	7.8
2005	7	10	191	7.1	7.9	8.9	7.4	9.8	11.5	9.5	6.9	10.3	7.7
2005	7	11	192	6.7	7.6	8.5	7.3	9.5	10.8	9.1	6.7	10.3	7.2
2005	7	12	193	6.4	7.2	8.1	6.7	8.8	10.6	9.3	6.9	10.6	6.9
2005	7	13	194	6.3	7.2	8.2	6.8	8.8	10.8	9.3	7	11.5	6.8
2005	7	14	195	6.5	7.3	8	6.1	8.9	11	9.1	5.5	10.1	7.2
2005	7	15	196	6.8	7.5	8.5	6.8	9.8	10.9	7.7	5.4	6.4	7.5
2005	7	16	197	6.4	7.3	8.1	6.5	9.6	10.6	7.4	5.7	7.2	7
2005	7	17	198	6	7.2	7.6	6.5	9.6	10.8	8.5	6.4	6.9	6.5
2005	7	18	199	5.9	7	7.7	6.4	9.4	10.9	8	6.2	7.3	6.3
2005	7	19	200	6.1	7.1	7.6	6.3	9.5	10.8	8.3	5.8	8.1	6.5
2005	7	20	201	6.3	7.3	8.3	7	9.3	10.9	8.5	6.3	9.6	6.8
2005	7	21	202	5.8	6.9	7.5	6.3	8.5	10.3	9.2	6.2	8.1	6.2
2005	7	22	203	6.3	7.3	8.1	6.5	9	11.2	9.6	6.2	7.3	6.8
2005	7	23	204	8.1	8.3	10.1	7.1	9.7	13.1	9.8	6.6	7.5	9.2
2005	7	24	205	8.6	8.8	9.7	6.4	10.6	13.3	9.4	5.8	7.8	10
2005	7	25	206	7	7.6	8.9	6.9	9	10.5	8.5	5.3	9.1	7.7
2005	7	26	207	7.4	7.8	9.4	6.9	9.1	11.4	8.9	6.1	7.6	8.4
2005	7	27	208	7	7.7	9.1	7.3	9.1	11.6	9.4	7.1	8.1	7.7
2005	7	28	209	7.5	8	9.7	7.4	9.2	12.5	10.3	6.8	8.5	8.3
2005	7	29	210	7.7	8	9.4	7	9.1	11.2	9.9	7	9.3	8.7
2005	7	30	211	6.8	7.3	8.9	7	8.5	10.7	8.9	5.5	10.2	7.4
2005	7	31	212	6.3	6.8	8.2	6.6	7.7	9.6	8.5	5.1	10.3	6.8
2005	8	1	213	5.6	6.5	7.3	6	8.1	9.6	7.8	5.9	9.8	6
2005	8	2	214	6.1	6.9	7.2	5.6	9.2	10.4	7.7	5.6	8.9	6.7
2005	8	3	215	6.2	6.9	7.1	5	8.8	10.2	7.5	5.5	8.7	7.1
2005	8	4	216	6.2	7	7.5	5.7	9.1	10.5	7.9	5.7	8.7	7
2005	8	5	217	6.5	7.1	8.2	6.3	8.5	10.2	8.2	6.1	9.1	7.3
2005	8	6	218	7	7.4	8.9	6.9	8.3	9.9	8.7	5.5	9.9	7.7
2005	8	7	219	6.9	7.2	8.7	6.4	8.5	10.3	7.9	5.6	9.6	7.7
2005	8	8	220	6.7	7	8.1	6.3	8.2	9.1	7.9	6.4	10	7.4
2005	8	9	221	6.8	7.2	8.5	6.8	8.2	10	9.2	6.5	10.4	7.4
2005	8	10	222	6.5	7.1	8.3	6.9	7.9	9.9	9.6	6	11.2	6.9
2005	8	11	223	6.5	6.9	8.3	6.5	7.9	9.4	8.1	6.2	11.4	7.2
2005	8	12	224	6.2	6.7	7.8	6.4	8	8.9	7.7	6.2	11.9	6.7
2005	8	13	225	5.9	6.5	7.6	6.4	7.5	8.7	8.4	6	12	6.4
2005	8	14	226	6.7	7	8.4	6.8	7.7	9.4	8.9	6.3	11.6	7.3
2005	8	15	227	6.9	7.1	8.7	6.5	7.8	10.4	9.2	6.2	10.7	7.7
2005	8	16	228	6.4	7.1	7.6	5.5	8.4	10.7	9.4	4.8	9.7	7.3
2005	8	17	229	6.5	6.9	7.7	5.4	8.1	10.2	8.4	5.6	10	7.4
2005	8	18	230	6.6	7.2	8.3	5.9	8.9	11.3	8.3	4.8	10	7.4
2005	8	19	231	5.9	6.6	7.6	6.5	7.8	9.1	8.5	5.5	11	6.3
2005	8	20	232	6.1	6.8	7.6	6.3	8.1	9.5	9	5.5	9.6	6.6
2005	8	21	233	4.8	5.5	6.2	5	5.9	7.4	7.7	4	9	5.2
2005	8	22	234	5.6	6.1	7.1	6	7.1	8	7.3	5.5	8.8	6
2005	8	23	235	5.5	6.2	7.1	5.8	7.3	8.6	7.9	5.7	8.7	5.9
2005	8	24	236	5.9	6.6	7.6	5.7	7.9	10	8.1	4.6	10	6.5
2005	8	25	237	5.2	6.2	6.6	5.1	8.1	9.3	7.5	4.6	8.2	5.6
2005	8	26	238	4.4	4.9	4.8	2.9	4	5.5	6.4	5.3	7.8	5.2
2005	8	27	239	5.4	5.8	6.2	4	6.2	8	6.8	5.2	7.4	6.2
2005	8	28	240	5	5.6	6.1	4.4	6.6	7.7	6.4	4.6	7.2	5.6
2005	8	29	241	4.7	5.6	5.8	4.2	6.8	7.9	7.1	5.2	5.1	5.3
2005	8	30	242	4.7	5.5	6	4.6	6.7	8	6.8	5.4	8.6	5.1
2005	8	31	243	4.4	5.3	5.5	4.1	6.3	7.4	6.6	4.9	8.9	4.9
2005	9	1	244	4.9	5.6	6.2	4.6	6.4	8.4	7.5	4.3	5.9	5.4
2005	9	2	245	3.9	4.5	4.8	3.5	4.7	6	5.6	4.7	7.1	4.3
2005	9	3	246	4.6	5.2	6	4.5	6.4	7.6	5.9	4.3	6.1	5.1
2005	9	4	247	4.4	5	5.5	4	6	6.8	5.1	4.1	5.9	4.9
2005	9	5	248	4.1	4.8	4.8	3.3	5.4	6	4.7	4.3	5.5	4.7
2005	9	6	249	4.1	4.8	4.8	3.4	5.9	6	4.5	4.6	6.3	4.7
2005	9	7	250	4.4	4.8	4.8	3	4.8	6	5.5	5.3	7.1	5.1
2005	9	8	251	4.1	4.9	4.9	3	5	6.4	6.3	4.7	6.8	4.8
2005	9	9	252	4.3	5.2	5.3	3.3	6.4	7.4	5.9	3.8	5.7	4.9
2005	9	10	253	4	5	5.1	3.3	6	7.3	6.5	3.8	5.7	4.5
2005	9	11	254	3.4	4.3	4.3	2.9	4.4	5.6	5.6	4.1	5.8	3.8
2005	9	12	255	2.6	3.3	3.4	2.3	2.4	4	5.6	4.5	6.8	2.9
2005	9	13	256	4.1	4.5	5.1	3.5	4.8	6.5	5.7	4.6	7.2	4.7
2005	9	14	257	3.9	4.7	4.7	2.9	5	6.5	6.1	4.6	5.7	4.5
2005	9	15	258	3.3	4.3	4.2	2.5	3.3	5.1	6.6	3.7	5.7	3.8
2005	9	16	259	3.4	4.1	4.5	3.3	4.3	5.8	5.9	3.8	6.9	3.7
2005	9	17	260	3.7	4.2	4.6	3.2	4.1	5.9	6.2	4.2	5	4.2
2005	9	18	261	2.9	3.2	3.4	1.9	1.6	3.9	6.8	3.9	6.2	3.4
2005	9	19	262	4	4.2	4.7	3	3.7	5.8	6.6	4.1	7.6	4.6
2005	9	20	263	2.5	3.3	3.3	2.1	2.1	3.8	6.4	4.1	7.2	2.8
2005	9	21	264	2.6	3.2	3.3	2.5	2.5	4.1	6.2	4.1	5.9	2.9
2005	9	22	265	2.8	3.6	3.8	2.7	3.3	5	6	3.6	5.9	3
2005	9	23	266	2.9	3.7	3.8	2.6	3.4	4.7	5.5	3.3	5.9	3.3
2005	9	24	267	2.6	3.2	3.4	2.6	3	4	4.7	3.4	4.5	2.8
2005	9	25	268	2.3	3	3.1	2.5	2.8	3.7	4.6	3.2	3.5	2.5
2005	9	26	269	2.3	2.7	2.9	2.2	2.2	3.3	4.5	3.2	2.6	2.5
2005	9	27	270	2.3	2.6	2.7	1.7	1.4	2.9	5.1	3.5	2.6	2.6
2005	9	28	271	2.6	2.9	3.1	2.3	2.4	3.5	4.8	3.1	2.3	2.9
2005	9	29	272	1.5	1.8	1.9	1.1	0.3	1.7	4.2	3.1	4	1.6
2005	9	30	273	2.3	2.7	2.9	2	2.3	3	3.3	3	4.4	2.6
2005	10	1	274	2.2	2.5	2.6	2.1	2	2.8	4	3	2.4	2.5
2005	10	2	275	2.6	3.3	3.4	2.3	3.1	3.8	4.3	3.1	1.8	2.9
2005	10	3	276	2.6	3.2	3.3	2.2	2.7	3.8	4.3	2.7	2.9	2.9
2005	10	4	277	1.8	2.2	2.3	1.6	1.4	2.2	3.1	3	5.2	2
2005	10	5	278	1.5	1.8	1.9	1.1	0.3	1.4	3.4	3.5	5.2	1.7
2005	10	6	279	2.2	2.4	2.6	2.2	2.4	2.7	3.1	3.3	5.6	2.4
2005	10	7	280	1.5	1.7	1.8	1	0.1	1.2	3.5	3.5	5.4	1.8
2005	10	8	281	2.2	2.4	2.7	2.1	2.6	2.7	2.5	3	6.8	2.4
2005	10	9	282	2.2	2.6	2.8	2.2	2.8	3.4	3.2	3.2	7.4	2.4
2005	10	10	283	1.9	2.7	2.6	1.7	1.8	2.9	4.4	3.2	4.9	2.1
2005	10	11	284	2.2	3.3	3.2	2.3	3.4	4.5	5.2	3.3	4.7	2.4
2005	10	12	285	2.5	3.2	3.3	2.4	3.9	4.3	4	3.9	6.1	2.8
2005	10	13	286	1.9	2.3	2.4	1.7	1.4	2.9	5.1	3.5	4.7	2
2005	10	14	287	1.7	2.3	2.3	1.4	1	2.6	5.4	2.7	6.2	1.9
2005	10	15	288	2.3	2.9	2.9	1.6	1.8	2.9	4.1	2.6	3.6	2.7
2005	10	16	289	2.2	2.9	2.9	1.6	1.9	3	3.8	2.6	2.8	2.5
2005	10	17	290	1.8	2.5	2.4	1.2	1.1	1.8	2.5	2.5	3.8	2.1
2005	10	18	291	1.9	2.8	2.7	1.4	1.6	2.6	3.5	3.2	2.3	2.2
2005	10	19	292	1.7	2.5	2.6	1.9	3.3	3.2	2.3	2.3	2.4	1.9
2005	10	20	293	1.8	2.3	2.5	1.8	3.3	2.5	1.5	1.7	1.3	2
2005	10	21	294	2.3	2.6	3	2.3	4	3.1	1.8	2.2	2.7	2.5
2005	10	22	295	2	2.4	2.6	2.1	3.4	2.7	1.9	1.9	3.7	2.1
2005	10	23	296	0.9	1.3	1.3	1	0.2	0.9	2.3	1.9	3	1
2005	10	24	297	1.1	1.4	1.4	1.1	0.5	1.2	2.8	2.5	7	1.1
2005	10	25	298	2.4	2.8	3.2	2.8	4.6	3.5	2.6	2.2	2.8	2.4
2005	10	26	299	2.5	2.9	3.3	3.1	4.3	3.5	3.2	2.7	4.5	2.6
2005	10	27	300	2.1	2.5	2.7	2.4	3.1	3.1	3.5	2.3	5.7	2.2
2005	10	28	301	2.1	2.4	2.7	2.6	3.4	2.7	3	2	4.4	2.2
2005	10	29	302	2.2	2.7	3	2.5	4.3	3.7	2.6	2	5.1	2.4
2005	10	30	303	1.6	1.8	1.9	1.1	0.8	1.5	2.8	2	5.8	1.8
2005	10	31	304	1.4	2	2.1	1.5	2.5	2.6	2.3	1.9	4.5	1.5
2005	11	1	305	1.5	2.2	2.2	1.3	3.6	2.8	1.6	1.8	-999	1.6
2005	11	2	306	1.7	2.4	2.5	1.7	6.3	4	1.5	1.9	-999	1.9
2005	11	3	307	1.8	2.5	2.6	1.6	5.4	4.3	2	1.7	-999	2
2005	11	4	308	1.6	2.4	2.4	1.4	3.8	3.4	2.3	1.7	-999	1.9
2005	11	5	309	1.9	2.4	2.6	1.9	6	3.3	1.3	1.4	-999	2
2005	11	6	310	2	2.5	2.8	2.1	6.5	4.2	1.6	1.6	-999	2.2
2005	11	7	311	2	2.5	2.9	2.2	6.1	4.2	1.6	0.9	-999	2.1
2005	11	8	312	1.8	2.4	2.8	2	6.1	4.7	1.9	1.6	-999	1.9
2005	11	9	313	1.7	2.4	2.6	1.6	6.9	5.2	1.8	1.7	-999	1.9
2005	11	10	314	2.2	2.7	3	1.4	7.6	6.1	2	1.7	-999	2.6
2005	11	11	315	2	2.5	2.8	1.4	5.7	5	2.1	1.5	-999	2.4
2005	11	12	316	1.7	2.3	2.6	1.4	6.4	5	1.8	1.6	-999	2
2005	11	13	317	1.6	2.3	2.5	1.4	6.5	5.1	1.9	1.5	-999	1.8
2005	11	14	318	1.3	2.1	2.3	1.4	6.2	4.9	2	1.4	-999	1.4
2005	11	15	319	1.3	1.8	1.9	1.3	2.8	2.6	2.1	1.5	-999	1.4
2005	11	16	320	1.8	2.2	2.5	2.2	5.3	3.2	1.8	1.3	-999	1.8
2005	11	17	321	1.5	2.1	2.5	1.8	6.5	5.5	1.9	1.4	-999	1.6
2005	11	18	322	1.2	1.9	2	0.8	5.9	4.5	1.6	1.4	-999	1.4
2005	11	19	323	1.1	1.8	1.9	1	6.1	4.2	1.4	1	-999	1.2
2005	11	20	324	1.1	1.7	1.9	1.2	5.6	3.5	1.3	0.8	-999	1.2
2005	11	21	325	1.2	1.8	1.9	1	6.3	3.8	1.3	0.8	-999	1.3
2005	11	22	326	1	1.6	1.7	0.7	3.5	2.5	1.1	0.9	-999	1.2
2005	11	23	327	0.7	1.4	1.4	0.5	5.9	3	0.8	0.8	-999	0.9
2005	11	24	328	1.2	1.7	1.9	0.4	6.7	4.5	1.2	1.1	-999	1.5
2005	11	25	329	1.5	1.9	2.2	1	6.9	5	1.7	1.3	-999	1.7
2005	11	26	330	1.4	1.9	2.1	1.4	5.9	4.1	2	1.3	-999	1.5
2005	11	27	331	1.5	2.1	2.4	1.6	6.3	5	2.4	1.5	-999	1.6
2005	11	28	332	2.2	2.5	3	2.4	5.8	5.1	3	1.7	-999	2.3
2005	11	29	333	2.3	2.5	2.9	2.8	6	4	2.7	1.4	-999	2.3
2005	11	30	334	1.5	2.1	2.5	1.7	6.7	6.1	2.5	1.3	-999	1.6
2005	12	1	335	1.3	1.8	2.1	1.5	6	4.3	1.9	1.4	-999	1.4
2005	12	2	336	1.3	1.7	2.1	1.2	6.2	5.2	1.8	1.7	-999	1.5
2005	12	3	337	1.3	1.8	2.2	0.4	7.5	6.8	2.3	0.9	-999	1.7
2005	12	4	338	0.5	1.4	1.6	0.1	8	7.4	2.7	1.5	-999	0.7
2005	12	5	339	0.7	1.4	1.6	-0.1	6.9	6.3	2.3	1.2	-999	0.9
2005	12	6	340	1	1.6	1.9	0.1	7.1	6.9	2.3	1.4	-999	1.3
2005	12	7	341	0.7	1.5	1.7	0.1	7.5	7.1	2.4	1.6	-999	1
2005	12	8	342	0.9	1.6	1.9	0.4	7.7	7.4	2.7	1.4	-999	1.1
2005	12	9	343	1.2	1.7	2.1	0.3	7.5	7.1	2.5	1.5	-999	1.6
2005	12	10	344	1.5	1.9	2.3	0.7	7.2	6.8	2.6	1.4	-999	1.8
2005	12	11	345	1.1	1.7	2	0.8	7.1	6.2	2.4	1.2	-999	1.3
2005	12	12	346	1.2	1.6	2	0.4	6.9	6.1	2.2	1.4	-999	1.5
2005	12	13	347	1.2	1.6	2	0.4	6.7	5.6	2.1	1.4	-999	1.6
2005	12	14	348	1	1.5	1.8	0.3	6.9	6.4	2.2	1.3	-999	1.3
2005	12	15	349	1	1.4	1.7	0.8	5.4	4	1.6	1	-999	1.2
2005	12	16	350	1	1.2	1.4	1.2	4.1	1.5	1.2	0.6	-999	1.1
2005	12	17	351	0.9	1.1	1.3	1	4.3	1.3	1	0.5	-999	1
2005	12	18	352	1	1.3	1.5	1.1	4.3	1.9	1.3	0.9	-999	1.1
2005	12	19	353	0.9	1.2	1.5	0.8	5	2.8	1.2	0.7	-999	1.1
2005	12	20	354	1.1	1.4	1.9	0.6	5.4	4	1.2	0.6	-999	1.4
2005	12	21	355	1.1	1.4	1.7	0.3	5.7	3.8	1.2	0.7	-999	1.4
2005	12	22	356	0.7	1.1	1.3	0.4	5.3	3.2	1.1	0.7	-999	0.8
2005	12	23	357	0.6	1	1.2	0.3	5	2.7	0.8	0.7	-999	0.7
2005	12	24	358	0.6	1	1.1	0.4	4.4	1.7	0.6	0.5	-999	0.7
2005	12	25	359	0.6	0.9	1.1	0.5	4.1	1.2	0.5	0.5	-999	0.7
2005	12	26	360	0.7	1	1.2	0.4	4.3	1.2	0.5	0.7	-999	0.8
2005	12	27	361	0.6	1	1.1	0.4	4.4	1.3	0.5	0.6	-999	0.8
2005	12	28	362	0.7	1	1.2	0.4	4	0.8	0.4	0.7	-999	0.8
2005	12	29	363	0.7	1	1.1	0.6	4.1	1.1	0.6	0.7	-999	0.8
2005	12	30	364	1	1.2	1.5	0.7	4.1	2.1	0.7	0.9	-999	1.1
2005	12	31	365	0.9	1.2	1.5	0.7	4.2	2.3	0.9	0.8	-999	1.1
2006	1	1	1	0.9	1.2	1.3	0.7	1.3	1.2	1.2	1.1	-999	1.1
2006	1	2	2	0.8	1	1.1	0.6	0.3	0.4	0.8	0.7	-999	1
2006	1	3	3	0.8	0.9	1	0.8	1.1	0.6	1	0.9	-999	1
2006	1	4	4	1.1	1.3	1.4	0.7	1.5	1.1	1.2	1	-999	1.3
2006	1	5	5	0.6	0.7	0.6	0.7	0	0.1	1.2	0.9	-999	0.6
2006	1	6	6	0.9	1.1	1.1	0.7	0.1	0.4	1.2	0.7	-999	1
2006	1	7	7	0.6	0.8	0.8	0.6	-0.2	0.1	1	0.7	-999	0.6
2006	1	8	8	0.9	1.1	1.2	0.6	0.1	0.3	0.8	0.5	-999	1
2006	1	9	9	0.9	1.1	1.2	0.7	1.3	0.7	0.7	0.7	-999	1
2006	1	10	10	0.9	1.1	1.2	0.6	0	0.1	0.6	0.5	-999	1.1
2006	1	11	11	0.8	1	1	0.6	0	0.1	0.7	0.8	-999	0.9
2006	1	12	12	0.8	1	1.1	0.7	1	0.5	0.6	0.6	-999	0.9
2006	1	13	13	0.6	0.7	0.7	0.6	0.2	0.1	0.6	0.7	-999	0.6
2006	1	14	14	0.7	1	1	0.8	1.3	0.6	0.7	0.7	-999	0.7
2006	1	15	15	0.7	0.9	0.9	0.8	1.4	0.4	0.5	0.7	-999	0.7
2006	1	16	16	0.7	1	1	0.8	1.4	0.6	0.5	0.8	-999	0.7
2006	1	17	17	0.8	1.2	1.2	0.7	1.6	0.7	0.6	0.8	-999	0.9
2006	1	18	18	0.6	0.9	0.9	0.6	0	0	0.5	0.7	-999	0.7
2006	1	19	19	0.4	0.5	0.5	0.6	0	-0.2	0.4	0.3	-999	0.4
2006	1	20	20	-999	-999	-999	-999	-0.2	-999	0.4	0.5	-999	-999
2006	1	21	21	0.6	0.7	0.7	0.8	1	-0.6	0.2	0.8	-999	0.6
2006	1	22	22	0.7	0.8	0.8	0.6	0.5	-0.1	0.2	0.8	-999	0.8
2006	1	23	23	0.6	0.8	0.8	0.5	-0.1	-0.1	0.4	0.4	-999	0.7
2006	1	24	24	0.7	0.9	0.9	0.8	0.5	0.3	0.8	0.7	-999	0.8
2006	1	25	25	0.7	0.9	0.9	0.7	0.3	0.3	0.9	0.8	-999	0.7
2006	1	26	26	0.7	0.9	0.9	0.9	0.8	0.4	0.8	0.9	-999	0.8
2006	1	27	27	0.8	1.1	1.1	0.9	1.3	0.4	0.5	0.6	-999	0.9
2006	1	28	28	0.6	0.7	0.8	0.9	0.9	-0.4	0.4	0.6	-999	0.6
2006	1	29	29	1	1.3	1.4	0.9	1.8	0.3	0.3	0.7	-999	1.2
2006	1	30	30	0.7	0.8	0.9	1	1.2	-0.5	0.3	0.7	-999	0.7
2006	1	31	31	1.2	1.3	1.5	0.9	1.6	0.5	0.4	0.9	-999	1.4
2006	2	1	32	0.8	0.9	0.9	1	1	0	0.5	0.7	-999	0.8
2006	2	2	33	0.4	0.5	0.4	0.6	-0.2	-0.1	0.6	0.6	-999	0.4
2006	2	3	34	0.5	0.5	0.5	0.6	-0.1	0	0.9	0.8	-999	0.5
2006	2	4	35	1	1.1	1.2	1.4	1.5	0.1	0.9	0.9	-999	1
2006	2	5	36	0.8	0.9	0.9	1.1	0.8	0.1	1	0.7	-999	0.8
2006	2	6	37	0.6	0.7	0.7	0.8	0.2	0.1	1.1	0.7	-999	0.6
2006	2	7	38	0.9	1	1.1	0.8	0.4	0.4	0.9	1.1	-999	1
2006	2	8	39	0.8	1.1	1.1	0.8	0.2	0.5	1.3	1.3	-999	0.9
2006	2	9	40	1.1	1.4	1.4	1.2	1.4	0.7	1	1.2	-999	1.2
2006	2	10	41	0.9	1.1	1.2	1	0.9	0.4	0.8	0.8	-999	1
2006	2	11	42	1.5	1.7	1.9	1.4	2	1.5	1.1	1.2	-999	1.7
2006	2	12	43	1.1	1.4	1.4	1.2	1.4	0.7	1.1	1.1	-999	1.2
2006	2	13	44	0.7	0.8	0.8	0.9	0.3	0.1	0.9	0.7	-999	0.7
2006	2	14	45	1	1.1	1.1	1.3	1.1	0.1	0.9	0.6	-999	1
2006	2	15	46	0.9	1	1.1	1.3	1.1	0	0.7	0.7	-999	0.9
2006	2	16	47	1.1	1.3	1.4	1.3	1.7	0	0.4	0.8	-999	1.1
2006	2	17	48	1	1.2	1.3	1.3	1.5	0	0.3	0.9	-999	1.1
2006	2	18	49	1.1	1.3	1.3	1.1	1.2	0.5	0.6	1.1	-999	1.2
2006	2	19	50	1.3	1.6	1.8	1.4	2.1	1.1	0.8	1.3	-999	1.4
2006	2	20	51	1.4	1.7	1.8	1.7	2	1.2	1.3	1.8	-999	1.5
2006	2	21	52	1.3	1.5	1.5	1.5	1.4	1	1.4	1.4	-999	1.4
2006	2	22	53	1.9	2.1	2.4	2.1	2.7	1.7	1.5	1.9	-999	2
2006	2	23	54	1.9	2.2	2.4	2.2	2.8	2	1.8	2	-999	2
2006	2	24	55	2	2.2	2.5	2.2	2.8	2.1	2	2.1	-999	2.2
2006	2	25	56	1.8	2.1	2.2	2.1	2.4	1.7	1.9	1.7	-999	1.9
2006	2	26	57	1.5	1.9	2	2.1	2.2	1.3	1.9	1.5	-999	1.6
2006	2	27	58	1.5	1.7	1.8	1.8	1.7	1.2	1.9	1.7	-999	1.6
2006	2	28	59	1.6	1.8	1.9	2	2	1.2	1.9	1.8	-999	1.7
2006	3	1	60	1.5	1.7	1.7	2	1.7	0.9	1.9	2	-999	1.5
2006	3	2	61	1.7	2	2.1	1.9	2.2	1.6	1.8	2.1	-999	1.8
2006	3	3	62	1.4	1.6	1.7	1.7	1.6	0.9	1.4	1.5	-999	1.5
2006	3	4	63	1.7	2	2.1	2.2	2.2	1.2	1.7	1.7	-999	1.8
2006	3	5	64	1.7	1.9	2	2.1	2	1.3	2	2.1	-999	1.7
2006	3	6	65	2.2	2.9	3	2.4	4	3	2.1	2	-999	2.4
2006	3	7	66	2.3	2.8	3	2.4	3.6	2.9	2.3	2.2	-999	2.5
2006	3	8	67	1.1	1.4	1.5	1	0.3	0.9	2.2	1.5	-999	1.2
2006	3	9	68	2.2	2.4	2.7	1.9	2.5	2.2	1.7	2.2	-999	2.5
2006	3	10	69	1.6	2	2.2	1.6	2.1	1.4	1	1.3	-999	1.8
2006	3	11	70	2.2	2.5	2.9	2.4	3.3	2.3	1.4	2.1	-999	2.4
2006	3	12	71	2.2	2.6	2.9	2.2	3	2.5	1.7	2.1	-999	2.5
2006	3	13	72	2.2	2.4	2.7	2.9	2.8	1.4	2	2.5	-999	2.3
2006	3	14	73	2.4	2.6	2.9	3	3	1.9	2.6	2.6	-999	2.4
2006	3	15	74	1.9	2.2	2.4	2	2.2	1.9	1.8	2.4	-999	2
2006	3	16	75	2.2	2.7	2.9	2.3	3.3	2.3	1.6	2.2	-999	2.4
2006	3	17	76	2.3	2.9	3	2.3	3.8	2.7	1.6	2	-999	2.5
2006	3	18	77	2	2.4	2.6	2.2	2.6	2	1.7	2	-999	2.1
2006	3	19	78	1	1.2	1.2	1.1	0.4	0.5	1.2	1.6	-999	1.1
2006	3	20	79	2.1	2.4	2.7	2.7	2.9	1.3	1.3	2.1	-999	2.1
2006	3	21	80	1.7	2	2.1	1.8	1.7	1.5	1.6	2.1	-999	1.9
2006	3	22	81	2.7	3	3.5	2.6	3.6	2.8	1.6	2.3	-999	3
2006	3	23	82	2.6	2.9	3.3	2.6	3.4	2.7	2.1	2.7	-999	2.8
2006	3	24	83	2.6	3	3.3	3	3.2	2.5	2.8	2.7	-999	2.8
2006	3	25	84	2.6	3	3.4	2.7	3.2	3	2.4	2.1	-999	2.9
2006	3	26	85	2.2	2.6	2.7	2	2.3	2.2	2	2	-999	2.5
2006	3	27	86	2.6	3.1	3.3	2.7	3.6	2.8	2.1	2.2	-999	2.8
2006	3	28	87	2.4	2.7	3	2.8	3	2.4	2.4	2.5	-999	2.6
2006	3	29	88	2.9	3.3	3.7	3	4	3.5	2.6	2.6	-999	3.1
2006	3	30	89	3.2	3.8	4.3	3.5	4.9	4.3	2.8	2.9	-999	3.5
2006	3	31	90	2.9	3.3	3.8	3.1	3.8	3.3	2.6	2.6	-999	3.2
2006	4	1	91	1.7	2	2	2.4	1.8	1.5	3.4	2.8	1.4	1.7
2006	4	2	92	1.3	1.5	1.6	1.1	0.3	1	2.3	2.4	2.3	1.5
2006	4	3	93	1.9	2.3	2.3	1.5	1.2	1.5	1.8	1.8	-999	2.3
2006	4	4	94	2.7	3.1	3.5	2.9	3.7	2.6	1.8	2.2	-999	2.9
2006	4	5	95	1.5	1.9	1.9	1.5	1.1	1.3	1.8	2.2	0.7	1.7
2006	4	6	96	2.3	2.7	2.9	2.5	2.9	2	1.8	1.9	1.3	2.4
2006	4	7	97	2.5	2.9	3.2	2.8	3	2.5	2.3	2.7	0.3	2.8
2006	4	8	98	3.3	3.8	4.3	4	4.4	3.7	3.2	2.9	3.6	3.5
2006	4	9	99	2.5	2.8	2.9	3.1	2.6	2.2	3.6	3.2	4.5	2.6
2006	4	10	100	3.1	3.4	3.8	3.8	3.6	3.1	4	3.2	4.4	3.2
2006	4	11	101	2.5	3	3.2	2.6	2.8	3.1	3.5	2.2	4.1	2.6
2006	4	12	102	3.6	4	4.6	4.3	4.8	3.6	3.4	3.5	3.2	3.8
2006	4	13	103	3.5	3.9	4.5	4.2	4.5	3.9	3.8	2.6	3.7	3.6
2006	4	14	104	3.9	4.4	4.8	3.9	5.1	4.8	4.3	3.4	3.8	4.2
2006	4	15	105	2	2.3	2.4	1.8	1.2	2.5	4.6	3.4	4.7	2.2
2006	4	16	106	3.6	4.2	4.6	3.9	5	4.6	3.8	3.7	4.1	3.8
2006	4	17	107	3.5	3.8	4.3	3.6	4	4.2	3.7	3.6	5.5	3.9
2006	4	18	108	3.1	3.5	3.9	3.9	3.8	2.9	3.2	2.9	4.4	3.2
2006	4	19	109	3.5	3.9	4.5	4.1	4.5	4.1	3.5	3.4	2.8	3.7
2006	4	20	110	3.5	3.8	4.2	4.6	3.8	2.6	4.1	3.6	3	3.6
2006	4	21	111	3.5	4	4.4	4	4.3	4.3	4.5	3.5	4.8	3.7
2006	4	22	112	3.7	4.2	4.8	4.4	4.8	4.1	3.7	3.7	4.2	3.9
2006	4	23	113	2.9	3.3	3.6	3.4	3.2	3.1	3.6	2.2	5	3
2006	4	24	114	2.8	3.7	3.7	3	3.9	4	3.8	3.3	3	3
2006	4	25	115	2.4	2.7	2.8	1.5	1.1	1.9	2.5	2.7	3.4	2.9
2006	4	26	116	3.1	3.7	4.1	3.4	4.4	3.2	1.9	2.3	0.8	3.4
2006	4	27	117	3.2	3.6	4.1	4	4.3	2.5	2.1	3.1	3.6	3.3
2006	4	28	118	3.2	3.6	4.2	3.6	4.1	3.7	2.7	3	4	3.5
2006	4	29	119	3.3	3.7	4.2	3.8	4.1	3.5	3.2	4	3.3	3.5
2006	4	30	120	3.5	3.9	4.5	3.9	4.4	4.2	3.7	4	4	3.7
2006	5	1	121	3.8	4.4	5.1	4.5	5.2	4.8	4	3.1	2.7	4
2006	5	2	122	3.3	3.9	4.3	3.7	4.1	4.3	4.2	3.6	3.9	3.5
2006	5	3	123	3	3.4	3.7	3	3.3	3.3	3.3	3.1	4.1	3.3
2006	5	4	124	4.5	4.9	5.8	4.8	5.9	5.2	3.9	4.2	2.7	4.8
2006	5	5	125	3.8	4.2	4.7	3.5	4.1	4.1	3.7	3.8	4.4	4.3
2006	5	6	126	2.9	3.2	3.6	2.9	2.9	3.3	3.5	3.8	0.9	3.3
2006	5	7	127	3.7	4.2	4.8	3.9	4.7	4.7	4	3.4	2.9	4
2006	5	8	128	3.8	4.4	4.9	4.2	5	4.9	4.4	3.1	2.3	4
2006	5	9	129	4.2	4.7	5.4	5.1	5.6	3.9	4	3.4	5.5	4.4
2006	5	10	130	4.1	4.6	5.3	5.2	5.2	3.9	3.9	3.5	4.3	4.2
2006	5	11	131	4	4.5	5.1	5	4.9	3.9	4.4	4	5.7	4.2
2006	5	12	132	4.4	4.8	5.5	5.6	5	4.1	5.2	4.3	5.8	4.5
2006	5	13	133	4.6	5.2	6	5.4	5.6	4.9	5.6	4.3	5.5	4.9
2006	5	14	134	4.5	5.1	5.9	5.2	6.2	5.4	4.3	4.3	6.7	4.8
2006	5	15	135	4.3	5.2	5.5	4.8	6.8	6.3	4.4	4.6	5.9	4.5
2006	5	16	136	4.5	5.1	5.8	5	5.8	6.2	5.7	5	7.8	4.8
2006	5	17	137	4.5	4.9	5.6	5.8	5.3	4.1	4.9	3.8	7.5	4.6
2006	5	18	138	4.1	4.6	5.3	4.3	5.2	5	3.8	3.9	3.9	4.6
2006	5	19	139	4.7	5.1	6.1	5.4	6	5.5	4.5	4.5	4.8	5
2006	5	20	140	4.5	4.9	5.8	4.9	5.5	5.4	4.9	4.4	6	4.9
2006	5	21	141	5.1	5.6	6.5	5.5	6.7	6.5	5.3	4.9	6.4	5.5
2006	5	22	142	5.1	5.6	6.6	5.4	6.6	7.3	5.7	4.9	7.7	5.5
2006	5	23	143	4.8	5.6	5.8	5.1	6.9	6.3	5.6	4.9	7.2	5.1
2006	5	24	144	5.4	5.9	7	5.6	6.9	7.8	6	5	8.4	5.9
2006	5	25	145	5.2	5.9	6.5	5.2	7.1	7.5	6.2	4.5	5.9	5.7
2006	5	26	146	3.6	4.3	4.5	3.7	4.1	5	6.5	5	7.5	3.9
2006	5	27	147	5	5.6	6.2	5.6	6.4	6.1	6.4	5.2	7.3	5.3
2006	5	28	148	5	5.5	6.4	5.3	6.2	5.9	5.4	5	9.7	5.5
2006	5	29	149	5.7	6	7.2	5.6	6.9	6.9	5.5	5.4	8.1	6.3
2006	5	30	150	5.8	6.2	7.5	5.9	7.1	8.2	7	5.3	7.6	6.3
2006	5	31	151	5.9	6.5	7.3	6.1	7.5	8	8.1	5.7	6.9	6.4
2006	6	1	152	5.3	5.8	6.7	5.7	5.9	7.3	9	5.1	9.4	5.6
2006	6	2	153	5.5	5.9	7	5.6	6.2	8.2	8.4	6	10.3	6.1
2006	6	3	154	5.5	6.2	6.9	5.8	7.1	7.9	7.8	5.9	11	6
2006	6	4	155	5.5	6.1	6.7	6.2	6.6	6.5	8.3	5.8	10.7	5.8
2006	6	5	156	6	6.7	7.3	5.7	7.8	9.6	8.6	5.8	10.3	6.6
2006	6	6	157	7.1	7.4	8.4	6.1	7.9	9.9	9.2	5.9	10.3	8.1
2006	6	7	158	5.9	6.6	7.3	6.8	7.7	7.1	7.8	4.8	11.3	6.2
2006	6	8	159	4.9	5.4	6.2	6	6.1	5.8	6	5.6	9.7	5
2006	6	9	160	5.1	5.6	6.5	6.3	6.3	6	6.3	4.8	6.3	5.2
2006	6	10	161	5.4	6.1	7	6.3	7.4	7.4	6.6	5.2	6.5	5.6
2006	6	11	162	5.4	5.9	6.8	6.3	6.8	6.3	6.4	5.4	8.2	5.7
2006	6	12	163	5.9	6.3	7.6	6.3	7.2	7.3	6.5	5.8	9.1	6.4
2006	6	13	164	6.4	6.8	8.1	6.4	7.8	8.8	7.6	6.2	8.7	7.1
2006	6	14	165	5.7	6.3	7.5	6	7.3	8.6	7.2	5.3	7.6	6.2
2006	6	15	166	5.5	6.3	7.1	6	7.8	8.5	6.6	5.1	7.6	5.8
2006	6	16	167	5.6	6.4	6.8	6	8.2	7.8	6.6	5.1	7.2	6
2006	6	17	168	6.1	6.8	7.6	6.1	8.5	9.5	7.2	6	7	6.7
2006	6	18	169	7	7.4	8.2	6.1	8.7	9.8	7.7	5.9	7.9	7.9
2006	6	19	170	7.9	8	9.1	6.1	9.1	10.9	7.9	6	8	9.2
2006	6	20	171	6.8	7.3	8.1	6.2	8.6	9.9	8.4	6.2	8.6	7.6
2006	6	21	172	6.6	7.3	7.7	6.1	8.6	9.7	8.9	5.6	8	7.4
2006	6	22	173	5.9	6.9	7.2	5.6	8.4	10.5	9.6	6.5	8.2	6.5
2006	6	23	174	5.8	6.9	7.3	6	8.8	10	8.2	5.3	6.8	6.3
2006	6	24	175	5.7	6.6	6.6	5.1	7.7	9.2	8.7	5.6	7.9	6.3
2006	6	25	176	5.4	6.4	6.7	5.6	7.8	8.7	8.4	5.6	6.9	5.8
2006	6	26	177	5.7	6.6	6.8	5.5	8	9.1	8.6	5.9	6.8	6.2
2006	6	27	178	6.3	7	7.4	5.5	8.3	10.2	8.6	5.8	6.8	7.1
2006	6	28	179	6.6	7.2	7.4	5.3	8.3	9.9	7.8	5.4	5.4	7.6
2006	6	29	180	7	7.3	7.8	5.2	8.2	9.7	7.3	5	6.3	8.1
2006	6	30	181	5.6	6.3	6.8	5.4	7.3	8	7.2	5.4	5.9	6.2
2006	7	1	182	5.8	6.4	6.9	5	6.9	8.7	7.9	5.6	6.2	6.6
2006	7	2	183	5.6	6.2	6.7	5.4	6.9	7.8	8	5.9	6.1	6.2
2006	7	3	184	4.4	5.2	5.4	4.5	5.3	6.4	8.1	6.1	6.1	4.8
2006	7	4	185	5.9	6.4	7	5.3	7.4	8.7	7.1	6	5.1	6.6
2006	7	5	186	6.1	6.6	7.7	5.8	7.7	9	7	5.1	5.7	6.8
2006	7	6	187	5.6	6.3	7	5.6	7.7	8.9	7.3	5	5.3	6.1
2006	7	7	188	4.6	5.3	5.8	5.3	5.9	6.3	7	5.2	6.5	4.9
2006	7	8	189	5.3	6.3	6.3	5	8	8.7	6.8	5.3	5.4	5.9
2006	7	9	190	6	6.8	6.9	5.1	8.6	9.6	7.3	5.9	7.2	6.8
2006	7	10	191	5.9	6.7	7	5.4	8.3	9.7	7.9	6.2	7.3	6.6
2006	7	11	192	6	6.8	7.4	5.9	8.3	10	8.8	7.2	9.2	6.5
2006	7	12	193	5.8	6.6	7	5.6	7.8	9.3	9.1	7.1	9.2	6.3
2006	7	13	194	5.9	6.8	7.2	6.1	7.7	9.1	10.1	6.1	8.4	6.3
2006	7	14	195	5.6	6	7	6.1	6.5	7.2	8.1	5.6	9.3	5.9
2006	7	15	196	5.2	5.6	6.2	5	6.2	6.6	6.6	6	6.8	5.7
2006	7	16	197	5.8	6.5	6.7	5.1	7.7	8.9	8.3	6.1	5.3	6.4
2006	7	17	198	5.3	6.4	6.4	5.3	7.9	9.1	8.8	6.4	7.1	5.8
2006	7	18	199	5.3	6.4	6.4	5.2	7.8	9.2	9	6.6	6.9	5.8
2006	7	19	200	5.6	6.6	6.7	5.3	8.3	9.6	9	6.5	9.1	6.1
2006	7	20	201	5.6	6.6	6.8	5.5	8	9.5	9.3	6.5	9.1	6.1
2006	7	21	202	5.3	6.3	6.4	5.6	7.5	7.8	8.5	5.5	8.8	5.7
2006	7	22	203	5.3	6.1	6.6	5.3	7.2	8.5	7.7	5	7	5.7
2006	7	23	204	6.7	7.1	7.5	5	7.9	9.6	7.6	4.8	6.4	7.8
2006	7	24	205	7.5	7.7	8	5	8.2	10.5	8.3	5.5	6.3	8.9
2006	7	25	206	6.4	6.8	7.4	5.2	7.7	9.8	8.2	5.8	7.6	7.3
2006	7	26	207	6.5	6.8	7	4.4	6.6	9.1	8.7	5.4	7.3	7.6
2006	7	27	208	5.2	5.9	6.2	4.3	5.9	8	8.5	5.4	7.2	5.9
2006	7	28	209	5.7	6.1	6.3	4.2	5.8	8.1	8.6	6	5.7	6.6
2006	7	29	210	6	6.2	6.2	3.7	5.5	7.6	7.6	5.7	5.9	7.2
2006	7	30	211	5.6	6.2	6.6	4.7	6.9	8.6	7	5.5	6.8	6.4
2006	7	31	212	6	6.7	6.9	5.1	7.7	9.4	8.5	5.5	7.8	6.8
2006	8	1	213	4.3	5.2	5.3	3.9	5	6.9	8.4	4.5	6.8	4.7
2006	8	2	214	5	5.5	6.2	4.9	5.9	7.2	7.6	5.3	6.3	5.4
2006	8	3	215	5.5	6	6.6	4.9	6.2	8.1	8.6	5.6	7.1	6.2
2006	8	4	216	5.5	6.1	6.7	4.9	6.2	8.6	9.3	6.1	10.6	6.2
2006	8	5	217	6	6.4	7.3	5.5	6.6	9	9.9	6.5	9.7	6.7
2006	8	6	218	6.3	6.6	7.6	6.1	6.4	8.2	10.2	5.8	10.2	6.9
2006	8	7	219	6	6.3	7.3	5.9	6	8	10.2	5.8	10.6	6.7
2006	8	8	220	5.9	6.3	7.4	5.9	6.3	8.1	9.5	5	11	6.5
2006	8	9	221	5.2	5.6	6.4	4.9	5.9	7.4	7.3	5.2	8.1	5.8
2006	8	10	222	5.5	6.1	6.8	5.3	6.7	8.4	8.5	6.3	6.5	6.1
2006	8	11	223	6.3	6.7	7.5	5.3	7.1	9.7	9.4	5.6	7.5	7.2
2006	8	12	224	5.9	6.6	7.4	5.7	6.9	9.4	10.1	5.5	6.6	6.5
2006	8	13	225	5.5	6	6.9	6.2	5.9	7.8	10	5.4	8.3	5.8
2006	8	14	226	5.9	6.2	7.4	5.5	6.4	8.9	9.2	5.4	7.6	6.6
2006	8	15	227	6.1	6.2	7.4	5.8	6.1	9	9.6	5.8	7.9	6.8
2006	8	16	228	5.5	5.8	6.6	5.8	5.5	7.5	10	6.2	9	6
2006	8	17	229	5.7	6	7	5.6	6	7.8	9.3	5.1	10.3	6.2
2006	8	18	230	5.2	5.5	6.3	5.3	5.2	7	9.1	5.4	8.9	5.6
2006	8	19	231	4.8	5.2	5.8	5.5	5.1	6.1	8.5	5.5	11.4	5
2006	8	20	232	4.9	5.1	5.7	6.1	4.6	4.7	8.7	5.8	10.4	5
2006	8	21	233	4.9	5.4	6.2	5.4	5.6	7.2	8.1	4.8	10	5.3
2006	8	22	234	5.1	5.5	6.4	5.6	5.7	7.3	8.3	5	9.9	5.4
2006	8	23	235	5	5.6	6.2	5.3	6	7.1	8.5	5.3	8.4	5.4
2006	8	24	236	5.2	5.7	6.4	5.4	5.9	6.8	8.4	4.7	9.6	5.5
2006	8	25	237	4.8	5.2	5.9	5.6	5.2	6.2	8.4	5.3	10	5
2006	8	26	238	5.1	5.5	6.3	5.7	5.3	7.1	9.4	4.5	9.7	5.5
2006	8	27	239	4.9	5.2	5.8	5.4	4.9	6.3	8.9	5.2	11.1	5.3
2006	8	28	240	4.3	4.6	5.1	4.9	4.5	5.3	7.3	4.8	8.8	4.5
2006	8	29	241	4.3	4.7	5.3	4.9	4.7	5.8	7.5	4.4	6.4	4.5
2006	8	30	242	3.6	3.9	4.2	3.9	3.5	4.7	7.6	5.2	7.8	3.8
2006	8	31	243	4.3	4.8	5.3	4.9	4.6	5.9	8.4	5	8.4	4.6
2006	9	1	244	4	4.5	4.8	3.6	4.3	5.6	7.2	4.5	6.4	4.4
2006	9	2	245	4.4	4.9	5.5	4.3	5.3	6.5	7.2	5.2	6.4	4.8
2006	9	3	246	4.2	4.7	5.1	4.1	4.9	5.8	6.8	4.2	7.9	4.5
2006	9	4	247	4	4.4	5	4.2	4.4	5.5	6.6	4.3	8.1	4.3
2006	9	5	248	3.6	3.9	4.3	3.6	3.6	4.7	6.4	4.8	9.6	3.9
2006	9	6	249	3.4	3.6	3.9	3.5	3.3	4.5	6.4	4.8	9.8	3.7
2006	9	7	250	3.6	3.8	4.2	3.7	3.6	4.5	6.3	4.7	8.3	3.9
2006	9	8	251	3.5	3.7	4	4.2	3.4	3.7	6.8	4.9	11.1	3.6
2006	9	9	252	3.5	3.8	4.1	4.3	3.4	3.7	7.1	4.3	10.4	3.6
2006	9	10	253	3.2	3.5	3.7	3.6	3.1	4	7	4.6	8.7	3.4
2006	9	11	254	3.7	4	4.4	4.3	3.8	4.5	7	5.2	12.4	3.9
2006	9	12	255	3.4	3.8	4.1	4.1	3.7	4.1	6.2	3.9	8.7	3.5
2006	9	13	256	3.9	4.1	4.6	3.5	4.2	5.8	5.6	4.8	7.1	4.3
2006	9	14	257	3.8	4.5	4.7	3.3	4.7	5.8	5.9	4.4	7	4.2
2006	9	15	258	3.3	4.1	4.2	2.8	4.1	5.1	5.1	3.7	7.9	3.7
2006	9	16	259	3.1	3.9	4	2.6	3.9	4.9	4.5	4.1	6.8	3.5
2006	9	17	260	3.6	4.2	4.3	2.6	4.3	5.3	4.4	3.8	7.9	4.1
2006	9	18	261	3.9	4.6	4.6	2.6	4.5	5.8	5.3	4	9	4.6
2006	9	19	262	4.4	4.8	5	3	4.7	6.3	5.9	4.4	8.9	5.2
2006	9	20	263	2.9	3.7	3.8	2.5	3.2	4.8	5.9	3.7	9	3.2
2006	9	21	264	2.7	3.5	3.5	2.4	2.9	4.3	5.3	3.8	7.8	3
2006	9	22	265	2.6	3.3	3.4	2.6	3.3	4	4.3	3.3	6.7	2.8
2006	9	23	266	2.4	2.8	2.9	2.2	2.1	3.2	4.6	3.7	7.1	2.6
2006	9	24	267	2.9	3.3	3.5	3.4	3.3	3.8	5.2	3.6	7.9	3
2006	9	25	268	2.5	3	3.2	2.8	3	3.8	4.8	3.2	7	2.6
2006	9	26	269	2.2	2.6	2.7	2.2	2.3	3.1	3.8	3.2	6.7	2.4
2006	9	27	270	3.1	3.5	3.9	3	3.7	4.7	4.3	3.5	6.4	3.4
2006	9	28	271	3.4	4	4.3	2.8	4.2	5.4	4.9	3.5	5.9	3.9
2006	9	29	272	2.9	3.9	3.9	2.5	3.9	5.3	5.6	3.4	5.2	3.2
2006	9	30	273	3.1	3.8	4	2.8	3.8	5.2	5.6	3.4	6.1	3.5
2006	10	1	274	2.1	2.5	2.6	1.5	1.1	2.4	5	2.8	5.8	2.4
2006	10	2	275	2.8	3.3	3.5	2.7	3.3	4.2	5.1	3.6	4	3.1
2006	10	3	276	2	2.5	2.6	1.4	0.9	2.3	4.9	3.3	4.9	2.3
2006	10	4	277	1.6	2	2.1	1.3	0.7	1.7	3.5	2.8	6.2	1.8
2006	10	5	278	1.7	2	2	1.8	1.3	2.1	4.1	3.4	3.6	1.9
2006	10	6	279	1.8	2	2	1.9	1.4	2.1	4.3	3.1	6.9	1.9
2006	10	7	280	2	2.2	2.3	1.6	1.2	2.6	5	3.2	6.8	2.2
2006	10	8	281	1.8	2	2.1	1.4	0.8	2.3	5.2	3.1	4.3	2
2006	10	9	282	2.4	3	3.2	2.6	2.9	4	5.3	3.3	4.1	2.6
2006	10	10	283	1.8	2.3	2.3	2	1.8	2.6	4.3	2.9	4.4	1.9
2006	10	11	284	1.2	1.6	1.6	1.3	0.6	1.7	4.3	3.1	3.6	1.3
2006	10	12	285	2	2.4	2.5	2.2	2.2	3.1	4.4	2.7	2.9	2.2
2006	10	13	286	2	2.3	2.4	2.2	2.1	2.8	4	2.7	3.1	2.1
2006	10	14	287	2.1	2.4	2.5	2.4	2.3	2.7	4.3	2.9	3.8	2.2
2006	10	15	288	2.1	2.4	2.6	2.3	2.4	2.8	3.6	2.5	4.1	2.3
2006	10	16	289	1.8	2.2	2.3	1.9	2.2	2.4	2.5	2	3	2
2006	10	17	290	1.9	2.6	2.6	1.5	2.3	2.6	2.5	2.1	1.8	2.2
2006	10	18	291	2	2.7	2.7	1.7	2.4	3.3	3.4	2.7	2.3	2.2
2006	10	19	292	1.7	2.6	2.5	1.7	2.1	3.2	4.1	3.2	3.1	1.9
2006	10	20	293	1.3	1.5	1.5	1.5	1	1.5	3.6	2.2	3.9	1.4
2006	10	21	294	2.1	2.2	2.3	1.9	1.9	2.6	3.4	3.1	3.1	2.3
2006	10	22	295	1.8	2.1	2.2	1.7	1.9	2.7	3	2.3	3.4	2
2006	10	23	296	1.6	2.3	2.3	1.6	2	2.9	3.3	2.4	3.3	1.7
2006	10	24	297	1.6	2.2	2.2	1.6	1.9	2.7	3.5	2.4	3.9	1.7
2006	10	25	298	1.6	2.1	2.2	1.6	2	2.5	2.7	2	4.1	1.7
2006	10	26	299	1.5	2	2.1	1.5	2.1	2.3	2.2	1.6	3.4	1.6
2006	10	27	300	1.5	2.2	2.2	1.4	2	2.4	2.2	1.5	2.8	1.7
2006	10	28	301	1.3	1.9	1.9	1.3	1.6	1.8	1.9	1.6	2.4	1.5
2006	10	29	302	1.5	2	2	1.3	1.6	1.8	1.9	1.6	2.2	1.7
2006	10	30	303	1.1	1.2	1.2	1.4	1.2	0.7	1.8	1.4	2.2	1.1
2006	10	31	304	1.3	1.8	1.8	1.4	1.6	2.2	2.4	1.6	2.6	1.4
2006	11	1	305	1.4	2.1	2.1	1.4	2.1	2.4	2.5	1.1	-999	1.6
2006	11	2	306	1.2	1.7	1.7	1.2	1.5	1.7	1.9	1.2	-999	1.3
2006	11	3	307	1.2	1.5	1.6	1.2	1.3	1.5	1.7	1.2	-999	1.3
2006	11	4	308	1.4	1.9	1.9	1.3	1.8	2	2.3	1.2	-999	1.5
2006	11	5	309	1.1	1.3	1.3	1.2	1.1	1	1.6	1.7	-999	1.2
2006	11	6	310	1.1	1.3	1.4	1	1.1	1	1.1	1.2	-999	1.2
2006	11	7	311	1	1.2	1.3	1.1	1.1	0.8	1.2	1.2	-999	1.1
2006	11	8	312	0.9	1.1	1.1	1.1	1	0.6	1.2	1.1	-999	1
2006	11	9	313	0.8	0.9	0.9	1	0.6	0.4	1.4	1.4	-999	0.8
2006	11	10	314	1.4	1.6	1.6	1.1	1.3	1.5	1.8	1.6	-999	1.6
2006	11	11	315	1.2	1.4	1.5	1.1	1.3	1.3	1.6	1.4	-999	1.4
2006	11	12	316	1.4	1.8	1.9	1.1	1.8	2.1	1.7	1.5	-999	1.6
2006	11	13	317	1.2	1.5	1.5	1.1	1.4	1.6	1.9	1.4	-999	1.3
2006	11	14	318	1	1.4	1.4	1.2	1.6	1.3	1.7	1.2	-999	1.1
2006	11	15	319	0.9	1.2	1.2	1	1.2	1	1.2	1	-999	1
2006	11	16	320	0.9	1.2	1.2	1	1.1	0.9	1.1	1.2	-999	0.9
2006	11	17	321	1	1.3	1.4	1	1.4	1.5	1.5	1.5	-999	1.1
2006	11	18	322	1.1	1.5	1.5	1	1.3	1.6	1.8	1.3	-999	1.2
2006	11	19	323	0.8	1	1	0.9	1	0.5	1.1	1	-999	0.8
2006	11	20	324	0.8	1	1	0.9	1	0.5	1	1.2	-999	0.8
2006	11	21	325	0.9	1.2	1.2	0.9	1.2	0.7	1.3	1.2	-999	1
2006	11	22	326	0.9	1.3	1.3	0.8	0.8	0.8	1.3	1.2	-999	1.1
2006	11	23	327	1	1.7	1.7	0.8	1.6	1.9	1.5	1.4	-999	1.2
2006	11	24	328	1.5	1.9	2.1	0.8	2.1	2.5	1.6	1.2	-999	1.8
2006	11	25	329	1.4	1.8	1.9	0.8	1.6	1.9	1.5	1.3	-999	1.7
2006	11	26	330	1	1.7	1.7	0.8	1.6	1.9	1.6	1.2	-999	1.2
2006	11	27	331	1	1.6	1.6	0.8	1.7	2	1.5	1.3	-999	1.1
2006	11	28	332	1.1	1.4	1.4	0.9	1.3	1.1	1.6	1.2	-999	1.2
2006	11	29	333	1.1	1.7	1.7	0.7	1.6	1.9	1.5	1.1	-999	1.3
2006	11	30	334	0.9	1.5	1.5	0.8	1.8	1.9	1.5	1.2	-999	1.1
2006	12	1	335	0.9	1.5	1.5	0.7	1.5	1.4	1.2	1	-999	1
2006	12	2	336	1.1	1.5	1.6	0.6	1.8	1.6	1	1.1	-999	1.3
2006	12	3	337	1.2	1.5	1.6	0.6	1.3	1.1	0.9	1.1	-999	1.5
2006	12	4	338	0.8	1.2	1.2	0.7	1.3	0.9	1.2	1.1	-999	0.9
2006	12	5	339	0.8	1	1	0.8	1.2	0.5	1.2	1	-999	0.8
2006	12	6	340	0.9	1.1	1.2	0.7	1.1	0.8	1	0.9	-999	1
2006	12	7	341	0.8	1	1	0.8	1.1	0.5	1.2	1.2	-999	0.9
2006	12	8	342	0.9	1.2	1.3	0.7	1.2	1.1	1.2	1.1	-999	1
2006	12	9	343	1	1.2	1.3	0.8	1.3	1.1	1.4	1.2	-999	1.2
2006	12	10	344	0.8	1	1	0.7	0.7	0.5	1.1	0.9	-999	0.9
2006	12	11	345	0.8	1.1	1.1	0.7	1.2	0.6	1.1	1	-999	0.9
2006	12	12	346	0.9	1.1	1.2	0.8	1.5	0.9	1.3	1.2	-999	1
2006	12	13	347	0.9	1.1	1.2	0.7	1.2	0.7	1.2	1.1	-999	1
2006	12	14	348	0.8	1	1.1	0.7	1.1	0.6	1.1	1.1	-999	0.9
2006	12	15	349	0.7	0.9	1	0.7	1.2	0.7	1	0.8	-999	0.8
2006	12	16	350	0.8	1	1.1	0.7	1	0.4	0.8	1.1	-999	0.9
2006	12	17	351	1	1.5	1.6	0.5	1.8	1.8	1.3	1.2	-999	1.2
2006	12	18	352	1.3	1.6	1.7	0.6	1.6	1.8	1.4	1.3	-999	1.6
2006	12	19	353	1.2	1.7	1.8	0.4	2	2.1	1.3	1.2	-999	1.5
2006	12	20	354	1.5	1.8	1.9	0.6	1.6	1.8	1.3	1.1	-999	1.9
2006	12	21	355	1.5	1.8	1.9	0.6	1.5	1.9	1.2	1.1	-999	1.9
2006	12	22	356	0.9	1.4	1.4	0.5	1.5	1.3	1	0.7	-999	1.1
2006	12	23	357	0.8	1.2	1.2	0.5	1.1	0.8	0.6	0.7	-999	0.9
2006	12	24	358	0.8	1.2	1.2	0.5	1.2	0.7	0.6	0.8	-999	0.9
2006	12	25	359	0.8	1.3	1.3	0.6	1.2	1	0.8	0.9	-999	1
2006	12	26	360	0.8	1.1	1.2	0.5	1.1	0.5	0.4	0.5	-999	0.9
2006	12	27	361	0.7	1	1	0.5	0.5	-0.1	0.2	0.5	-999	0.8
2006	12	28	362	0.6	0.9	0.9	0.4	0.8	-0.3	0.1	0.4	-999	0.8
2006	12	29	363	0.7	1	1.1	0.5	1	0.2	0.3	0.7	-999	0.8
2006	12	30	364	1	1.2	1.3	0.4	1.1	0.2	0.2	0.5	-999	1.2
2006	12	31	365	0.9	1.2	1.2	0.5	1	0.3	0.3	0.6	-999	1.1
2007	1	1	1	0.6	0.8	0.8	0.6	1.4	-0.1	0.3	0.6	-999	0.6
2007	1	2	2	0.6	0.9	0.9	0.6	1.4	-0.1	0.4	0.6	-999	0.7
2007	1	3	3	0.6	0.9	0.9	0.7	1.7	0.3	0.6	0.8	-999	0.7
2007	1	4	4	1.3	1.4	1.6	0.7	1.8	1.1	0.9	0.9	-999	1.6
2007	1	5	5	0.4	0.5	0.5	0.5	-0.1	-0.1	0.6	0.9	-999	0.5
2007	1	6	6	0.5	0.6	0.6	0.5	-0.2	-0.1	0.4	0.5	-999	0.5
2007	1	7	7	0.5	0.6	0.6	0.5	-0.3	-0.1	0.5	0.9	-999	0.5
2007	1	8	8	0.5	0.7	0.7	0.5	0.2	-0.2	0.2	0.4	-999	0.5
2007	1	9	9	0.5	0.7	0.7	0.6	-0.2	0	0.6	0.9	-999	0.6
2007	1	10	10	0.6	0.9	0.9	0.6	-0.1	0.1	0.6	0.7	-999	0.7
2007	1	11	11	0.8	1.2	1.2	0.7	0.8	0.6	0.8	0.9	-999	0.9
2007	1	12	12	0.7	1	1	0.7	0.8	0.4	0.8	0.8	-999	0.8
2007	1	13	13	0.6	0.9	0.9	0.7	0.8	0.3	0.7	0.7	-999	0.6
2007	1	14	14	0.8	1.2	1.3	0.8	2.1	1.1	0.8	0.9	-999	0.9
2007	1	15	15	0.8	1	1.1	0.8	1.9	0.5	0.6	0.5	-999	0.8
2007	1	17	17	0.8	1.2	1.2	0.7	1.5	0.6	0.6	0.7	-999	1
2007	1	18	18	0.9	1.3	1.3	0.8	1.9	1.1	0.8	0.9	-999	0.9
2007	1	19	19	0.7	1.3	1.3	0.8	1.5	1	0.9	1	-999	0.8
2007	1	20	20	1	1.3	1.4	0.8	1.1	0.9	0.8	0.7	-999	1.2
2007	1	21	21	1.3	1.5	1.7	0.9	2	1.3	0.8	0.7	-999	1.5
2007	1	22	22	0.8	1.2	1.2	0.8	1.4	0.7	0.7	0.6	-999	0.9
2007	1	23	23	0.8	1.2	1.2	0.8	0.8	0.8	1	1.2	-999	0.8
2007	1	24	24	1.1	1.5	1.6	1.1	2.1	1.9	1.6	1.5	-999	1.2
2007	1	25	25	0.9	1.3	1.3	0.9	0.5	1	1.8	1.4	-999	1
2007	1	26	26	1	1.4	1.4	1	1.3	1.4	1.7	1.3	-999	1
2007	1	27	27	0.8	1.2	1.2	0.7	-0.2	0.5	1.5	1.3	-999	0.9
2007	1	28	28	0.9	1.1	1.2	1	1.1	0.7	1.1	0.9	-999	1
2007	1	29	29	1.3	1.5	1.7	1	1.8	0.8	0.6	0.9	-999	1.5
2007	1	30	30	0.8	0.9	1	0.9	1.1	0	0.3	0.7	-999	0.8
2007	1	31	31	0.5	0.6	0.6	0.5	-0.1	-0.2	0.3	0.8	-999	0.5
2007	2	1	32	0.6	0.8	0.8	0.6	0.1	-0.1	0.4	0.8	-999	0.7
2007	2	2	33	1.1	1.4	1.6	1.1	2	0.7	0.4	0.8	-999	1.3
2007	2	3	34	1.2	1.3	1.4	0.9	1	0.6	0.6	0.8	-999	1.4
2007	2	4	35	1.2	1.4	1.6	1.2	1.8	1	0.8	1	-999	1.3
2007	2	5	36	1.2	1.5	1.6	1	1.5	1	0.8	0.7	-999	1.3
2007	2	6	37	1.1	1.3	1.4	0.8	0.4	0.6	0.9	0.7	-999	1.3
2007	2	7	38	0.8	1	1.1	0.7	0.2	0.3	0.7	0.6	-999	0.9
2007	2	8	39	1	1.3	1.3	1	1	0.8	1	1.4	-999	1.1
2007	2	9	40	1.1	1.3	1.4	1.4	1.6	0.5	0.9	0.9	-999	1.1
2007	2	10	41	0.8	1	1	0.9	0.4	0.4	1.1	1.4	-999	0.8
2007	2	11	42	0.8	1	1	0.9	0.3	0.4	1.4	1.6	-999	0.8
2007	2	12	43	1.1	1.3	1.3	1.2	1	0.9	1.4	1.5	-999	1.2
2007	2	13	44	1.3	1.6	1.7	1.4	1.9	0.8	0.9	1.2	-999	1.4
2007	2	14	45	1.4	1.7	1.8	1.4	2.1	1	1	1.5	-999	1.5
2007	2	15	46	1.3	1.6	1.7	1.3	1.5	1.1	1.2	1.3	-999	1.5
2007	2	16	47	1.1	1.2	1.2	1.3	1.2	0.4	1.1	1.1	-999	1.1
2007	2	17	48	0.8	1	0.9	1	0.5	0.3	1.2	1.4	-999	0.9
2007	2	18	49	0.9	1.1	1.1	1	0.5	0.5	1.2	1.4	-999	1
2007	2	19	50	1.4	1.7	1.8	1.6	2.1	1.2	1.2	1.5	-999	1.5
2007	2	20	51	1.1	1.3	1.3	1.3	1.1	0.6	1.2	1.6	-999	1.1
2007	2	21	52	1.7	1.9	2.1	2.1	2.6	1.2	1.4	1.6	-999	1.7
2007	2	22	53	2	2.2	2.4	1.6	2.2	2.1	1.7	1.9	-999	2.3
2007	2	23	54	1	1.3	1.4	0.9	0.1	0.7	1.7	1.4	-999	1.2
2007	2	24	55	1.9	2.2	2.5	2.2	3	2.2	1.7	1.5	-999	2
2007	2	25	56	1.8	2.3	2.4	2.1	3.3	1.7	1.4	1.5	-999	1.9
2007	2	26	57	1.7	2.1	2.3	2	3.2	1.6	1.1	1.2	-999	1.8
2007	2	27	58	1.9	2.2	2.5	1.9	3.1	1.9	1.1	1.9	-999	2
2007	2	28	59	1.3	1.6	1.7	1.6	1.5	0.9	1.3	1.6	-999	1.4
2007	3	1	60	1.6	1.9	2	1.4	1.6	1.6	1.5	1.7	-999	1.9
2007	3	2	61	2.3	2.6	2.9	1.9	3.1	2.7	1.6	2.1	-999	2.6
2007	3	3	62	1.9	2.3	2.6	1.8	2.5	2.5	1.8	1.6	-999	2.2
2007	3	4	63	1.9	2.6	2.6	1.8	3.1	2.2	1.3	1.2	-999	2.2
2007	3	5	64	2.3	2.7	2.7	1.6	2.4	2.1	1.4	1.5	-999	2.7
2007	3	6	65	2.5	3	3.2	2.1	3.9	2.7	1.1	1.2	-999	2.9
2007	3	7	66	2.5	2.9	3.3	2.6	4.4	3.1	1.5	2.2	-999	2.7
2007	3	8	67	2.1	2.5	2.8	2.2	3	2.6	1.8	2	-999	2.3
2007	3	9	68	2.3	2.9	3.1	2.6	4	2.8	1.9	2	-999	2.5
2007	3	10	69	2.4	2.8	3.1	2.7	4	2.5	1.7	2.4	-999	2.5
2007	3	11	70	2.7	3.2	3.5	2.8	4.6	3.3	2.1	2.1	-999	2.9
2007	3	12	71	2.4	2.9	3.1	2.5	3.5	2.9	2.3	2.2	-999	2.6
2007	3	13	72	2.4	2.7	3.1	2.3	3	2.5	1.9	2.1	-999	2.7
2007	3	14	73	2.1	2.6	2.7	2.1	2.9	2.2	1.5	2.1	-999	2.4
2007	3	15	74	2.3	2.8	2.9	2.4	3.8	2.2	1.3	1.5	-999	2.5
2007	3	16	75	1.5	1.8	1.8	1	0.6	0.6	1	1.4	-999	1.8
2007	3	17	76	1.9	2.4	2.4	1.8	2.4	1.3	1	1.6	-999	2.2
2007	3	18	77	1.7	2	2.2	1.9	2	1.1	1.1	2.1	-999	1.9
2007	3	19	78	2.5	2.9	3.3	2.9	3.8	2.2	1.3	1.9	-999	2.6
2007	3	20	79	2.6	3.1	3.5	3	4.2	2.9	1.7	1.9	-999	2.7
2007	3	21	80	2.7	3.3	3.5	3.1	4.6	2.5	1.7	2.2	-999	2.9
2007	3	22	81	2.4	2.9	3	2.5	3.3	2.5	2.3	2.1	-999	2.6
2007	3	23	82	2.2	2.6	2.8	2.1	2.3	2.6	2.5	2.3	-999	2.4
2007	3	24	83	3.1	3.5	4.2	3.1	4.4	3.8	2	2.2	-999	3.4
2007	3	25	84	3	3.5	4.1	3.3	4.7	3.3	1.6	2.2	-999	3.3
2007	3	26	85	2.1	2.5	2.6	2.4	2.7	1.6	1.9	2.1	-999	2.2
2007	3	27	86	2.6	3.1	3.4	2.8	3.8	2.5	1.8	2.3	-999	2.8
2007	3	28	87	2.9	3.4	3.7	3.1	4.4	3	2	2.4	-999	3.1
2007	3	29	88	2.4	2.9	3	2.4	3	2.2	1.9	2.2	-999	2.7
2007	3	30	89	2.3	2.7	3	2.5	2.9	2.3	1.7	2.5	-999	2.6
2007	3	31	90	2.6	3.2	3.4	2.8	3.7	2.8	2.4	2.5	-999	2.8
2007	4	1	91	2.3	2.6	2.9	2.5	3	2.1	1.5	2.3	2.4	2.4
2007	4	2	92	2.3	2.8	3	2.3	3	2.3	1.6	2	1.2	2.5
2007	4	3	93	3.1	3.7	3.9	3.1	4.9	3.2	1.5	1.8	0.9	3.4
2007	4	4	94	2.3	2.8	2.9	2.4	3.3	2.2	1.4	2.2	-999	2.4
2007	4	5	95	2.9	3.4	3.7	3	4.1	3.2	2	2.6	1.6	3.1
2007	4	6	96	3.5	4.1	4.8	4	5.4	4.5	2.5	2.4	2.9	3.8
2007	4	7	97	3.1	3.6	4.1	3.4	4.5	3.8	2.6	2.5	3	3.3
2007	4	8	98	3.2	3.8	4.2	3.6	5.1	3.6	2.2	2.6	1.1	3.5
2007	4	9	99	3.3	3.9	4.1	3.7	5.1	3.1	2.5	2.3	3.2	3.5
2007	4	10	100	1.9	2.5	2.5	1.8	1.7	1.9	2.3	2.7	1.4	2.1
2007	4	11	101	-999	-999	-999	-999	-999	-999	2.5	2.9	2.7	-999
2007	4	12	102	3.5	4	4.6	3.7	5.2	4.1	2.3	2.7	3.2	3.9
2007	4	13	103	3.5	4.1	4.8	4.1	5.7	4.5	2.3	2.7	0.6	3.7
2007	4	14	104	3.6	4.2	4.9	4.2	5.9	4.6	2.3	2.6	3.4	3.8
2007	4	15	105	2.8	3.2	3.7	2.9	3.5	3.1	1.8	2.5	3.4	3.1
2007	4	16	106	2.1	2.3	2.5	1.9	1.8	1.8	1.6	2.6	2.2	2.4
2007	4	17	107	3	3.5	4	3.4	4.3	3.4	2.1	2.7	2.5	3.2
2007	4	18	108	3.6	4.1	4.9	4	5.1	4.4	2.6	2.8	3.7	3.9
2007	4	19	109	2.3	2.6	3	2.4	2.6	2	1.4	2.3	2	2.6
2007	4	20	110	2.6	3.2	3.2	2.8	3.7	2.1	1.4	2.6	2.7	2.9
2007	4	21	111	2.5	3.1	3.1	2.6	3.6	2.2	1.4	2.9	1.4	2.7
2007	4	22	112	2.6	3.4	3.3	2.7	3.4	3.1	2.7	3.4	3.6	2.8
2007	4	23	113	3.6	4.4	4.5	3.9	6.2	4.3	2.2	2.7	3	3.8
2007	4	24	114	4.5	5.2	5.7	4.3	7.3	5.5	2	2.6	0.6	5.1
2007	4	25	115	3.8	4.6	4.6	4.1	6.9	4.5	1.9	3.1	2.8	4
2007	4	26	116	4.1	5	5	4.4	7.4	5.5	2.8	3.3	3.2	4.4
2007	4	27	117	4	5	5.1	4.4	7.4	5.9	3	2.4	3.1	4.3
2007	4	28	118	4	5	4.9	4.5	7.4	5.6	3.2	3.9	2.8	4.1
2007	4	29	119	4.5	5.4	5.5	4.7	7.7	6.1	3.5	3	3.1	4.9
2007	4	30	120	4.3	5	5.6	4.3	6.6	5	2.3	2.9	0.9	4.8
2007	5	1	121	3.7	4.4	4.7	3.7	5.4	4.8	3.1	3.4	1.7	4.1
2007	5	2	122	4.6	5.4	5.8	4.9	7.7	6.7	4	4.1	3.3	4.9
2007	5	3	123	4.3	5.2	5.7	4.9	7	6.6	4.3	3.7	3.1	4.6
2007	5	4	124	4.2	5	5.5	4.2	6.1	6.5	4.5	3.5	3.2	4.7
2007	5	5	125	5	5.8	6.4	5.3	7.8	7.5	5	4.6	3.3	5.3
2007	5	6	126	3.5	4.1	4.6	4	4.4	5	5.2	4.4	3.9	3.6
2007	5	7	127	3.2	3.6	3.9	3.7	3.4	3.9	5.8	4.2	4.8	3.3
2007	5	8	128	4.5	5.1	5.9	5.3	5.9	6.1	5.9	4.9	6.2	4.7
2007	5	9	129	4.5	5.1	5.9	5.2	5.8	5.9	5.7	3.8	6.1	4.8
2007	5	10	130	4.5	5.2	6.1	5.3	6.5	6.4	4.6	3.5	6.2	4.8
2007	5	11	131	3	3.3	3.6	2.8	2.8	3.8	4.4	3.9	3.2	3.4
2007	5	12	132	4.3	4.9	5.6	4.5	5.7	6	4.6	3.4	5.2	4.6
2007	5	13	133	3.6	4.1	4.5	3.2	3.9	4.8	4.6	3.8	3	4.1
2007	5	14	134	3.9	4.4	4.8	3.6	4.6	5	3.9	4.1	2.5	4.4
2007	5	15	135	4.4	5.1	5.9	4.8	6.1	6.5	4.6	4.2	1.3	4.8
2007	5	16	136	3.7	4.4	4.8	3.9	4.7	5.5	5.1	4.3	4.9	4
2007	5	17	137	4.7	5.7	6.2	5.4	7.7	7.5	5.2	4.5	2.9	5
2007	5	18	138	4.5	5.4	6	5	7	7	4.8	3.9	5.4	4.8
2007	5	19	139	5.1	6.1	6.4	5.8	8.7	7.5	4.7	3.9	5.2	5.4
2007	5	20	140	3.1	4	3.9	3.1	3.6	4.4	5.3	5.2	5	3.4
2007	5	21	141	3.1	3.7	3.9	3	3	4.6	6.5	4.9	6.1	3.4
2007	5	22	142	5.7	6.8	7.2	6.3	9.4	9.7	7	5.4	4.9	6
2007	5	23	143	6	6.7	7.1	5.7	9.3	9.2	5.9	6.1	5.3	6.6
2007	5	24	144	5.7	6.7	7.2	6.3	8.6	9.1	7.9	5.1	6.2	6
2007	5	25	145	3.6	4.6	4.6	3.5	4.2	5.9	7.2	6.2	7.8	3.9
2007	5	26	146	6.3	7.2	7.6	6.5	9.7	9.7	7.2	5.6	8.2	6.9
2007	5	27	147	6.1	7	7.1	6.1	9.7	8.8	6.2	5	7.1	6.7
2007	5	28	148	5.5	6.3	6.7	5.4	8.1	8.3	6.3	5.1	4.7	6
2007	5	29	149	5.8	6.7	7.3	6.2	9.2	9	5.9	4.8	5.1	6.3
2007	5	30	150	5.2	6.1	6.4	5.5	7.9	7.8	6.4	4.8	6.4	5.5
2007	5	31	151	4.8	5.7	5.9	4.8	6.8	7.5	6.8	5.9	6.3	5.2
2007	6	1	152	5.5	6.5	7.2	6.1	8.5	9.1	6.6	5.3	5.4	5.9
2007	6	2	153	5.6	6.5	7.2	6.2	8.9	8.8	5.7	5.4	7	5.9
2007	6	3	154	5.4	6.4	6.5	6	8.9	7.9	5.9	5.5	6.8	5.7
2007	6	4	155	5.9	6.9	7.3	6.5	9.7	9.2	6.5	5.2	5	6.3
2007	6	5	156	6.2	7.2	7.8	6.7	9.7	9.9	7.1	5.5	6	6.6
2007	6	6	157	6.4	7.3	7.7	6.4	10.1	10.6	7.1	5.9	6.2	7
2007	6	7	158	6.8	7.5	8.1	6.5	9.7	10.2	7.6	5	6.7	7.5
2007	6	8	159	6.4	7.1	7.7	6.4	9.5	9	6.1	4.6	6.9	7
2007	6	9	160	5.4	6.2	6.4	5.3	7.7	7.4	5.7	4.6	5.5	6
2007	6	10	161	6.2	6.9	7.7	6.1	9	9.3	6.2	5	5.2	6.8
2007	6	11	162	6.3	7.1	7.9	6.4	9.4	10	6.9	5.6	6.1	6.9
2007	6	12	163	6.4	6.9	7.9	6.1	9	9	5.5	5.3	5.3	7.1
2007	6	13	164	6.2	7.1	7.2	5.9	9.7	9.6	6.6	6	5.7	6.9
2007	6	14	165	6.1	7.3	7.4	6.5	10.2	10.5	7.9	5.7	7.1	6.6
2007	6	15	166	6.3	7.5	7.7	6.7	10.5	11.1	8.5	6.1	7.4	6.8
2007	6	16	167	6.7	7.7	8	6.6	10.3	11.6	8.9	5.8	8	7.3
2007	6	17	168	7.1	7.8	8	6.3	10.1	10.6	8.3	6	6.9	8
2007	6	18	169	6.9	7.6	7.7	6.1	9.9	10.1	8.1	5.9	7.2	7.7
2007	6	19	170	7	7.3	7.5	5	8.3	9.4	7.1	5.7	5.8	8.2
2007	6	20	171	7	7.5	8.2	6.2	9.8	10.2	6.5	5.9	8	8
2007	6	21	172	6.7	7.4	7.7	6.2	10	10.1	6.5	6.3	8.9	7.5
2007	6	22	173	6.7	7.4	7.5	6	10.1	9.9	6.3	6	7.9	7.5
2007	6	23	174	5.8	6.9	6.9	6.2	9.7	9.5	7.3	6.6	9.1	6.2
2007	6	24	175	6.4	7.2	7.3	6	9.7	10	7.3	6.3	9.4	7
2007	6	25	176	6.3	7.2	7.3	6	9.7	10	7.4	5.6	9.5	7
2007	6	26	177	7.1	7.6	7.8	5.9	10	10	6.8	6.5	10.8	8.1
2007	6	27	178	6.8	7.3	8.2	6.4	9.1	10.1	7.3	6.9	11.8	7.6
2007	6	28	179	6.6	7.5	8	6.6	10	11.3	8.4	6.4	11.9	7.2
2007	6	29	180	7.4	8	8.3	6.2	10.6	12.5	9	6.4	8.9	8.4
2007	6	30	181	6.7	7.6	7.7	6.2	10.4	11.2	8.2	6.7	10	7.4
2007	7	1	182	7.1	7.8	7.9	6.2	10.7	11.2	7.3	6.5	11.4	8.1
2007	7	2	183	7	7.6	7.9	5.7	9.9	11	7.7	5.6	9.9	8
2007	7	3	184	7.3	7.8	8.5	6.3	10.2	11.5	7.5	6.1	9.1	8.3
2007	7	4	185	7.3	7.9	8.6	6.5	10.3	11.8	8.1	6.2	9.4	8.3
2007	7	5	186	6.5	7.5	7.7	5.9	10.7	11.7	8.8	5.7	10	7.2
2007	7	6	187	6.9	7.9	8	6.5	10.8	11.5	9.7	6	8.5	7.5
2007	7	7	188	7.9	8.5	8.7	6.7	10.9	12.2	9.6	5.8	8.1	8.9
2007	7	8	189	8.3	8.5	8.8	6.1	10.8	12.1	8	6.5	9	9.7
2007	7	9	190	6.9	7.7	7.9	5.9	10.6	11.6	8.4	6	10	7.8
2007	7	10	191	3.9	4.9	4.8	3	3.4	5.6	8.9	6.9	10.2	4.5
2007	7	11	192	7.6	8.1	8.4	5.9	10.3	12	9.4	6.6	9.8	8.8
2007	7	12	193	7.9	8.3	8.8	6.3	10.3	12.7	9.5	6.7	10.2	9
2007	7	13	194	7.1	7.8	8.9	6.9	9.8	12	9.2	6	10.9	7.8
2007	7	14	195	7.4	7.9	9.3	7	9.7	11.8	8.8	6.8	11.7	8.3
2007	7	15	196	8.1	8.2	10	6.9	10	12.3	7.9	6.7	11.1	9.3
2007	7	16	197	7.4	7.8	8.3	5.8	10.2	11.1	6.3	4.9	9.2	8.5
2007	7	17	198	6.6	7.2	8	5.7	9.4	9.8	5.2	4.5	7.2	7.6
2007	7	18	199	6.7	7.4	7.8	5.9	9.8	10.3	6.5	5.4	8.1	7.6
2007	7	19	200	6.4	7.2	7.6	6.1	9.7	10.6	7.5	6.2	8.5	7
2007	7	20	201	5.8	6.8	7.4	6.3	9.2	9.7	7	7.1	9	6.3
2007	7	21	202	6.1	7.2	7.3	6.1	9.8	10.9	8.5	5.9	9.3	6.6
2007	7	22	203	6.2	7.2	7.3	5.6	9.9	10.9	8.2	6.2	9.5	6.9
2007	7	23	204	6.8	7.5	7.7	5.8	10	11.1	8.4	6.5	9.4	7.6
2007	7	24	205	6	7.2	7.2	6.1	9.8	10.8	9	6.9	8.2	6.5
2007	7	25	206	6.4	7.4	7.5	6.6	9.6	9.9	9.6	6.4	7.3	6.9
2007	7	26	207	5.5	6.6	6.6	5.1	7.7	9.9	10.1	6.5	8.7	6
2007	7	27	208	6	7.2	7.2	6.1	10.2	11	8.9	6.5	8.9	6.5
2007	7	28	209	6.8	7.6	7.8	5.5	10.3	11.8	9	6.7	9	7.8
2007	7	29	210	4.9	5.7	5.6	3.9	5.3	7.2	8.8	6	10.4	5.6
2007	7	31	212	5.2	6.6	6.5	5.5	8.6	9.9	9.7	6.4	9.6	5.6
2007	8	1	213	3	4.3	4	2.5	2.4	5	9.6	6.1	9.7	3.4
2007	8	2	214	5.8	6.8	6.8	5	8.3	10.3	9.3	6.7	11	6.5
2007	8	3	215	7.3	7.8	8.4	6	10	12.2	9.1	6.2	11	8.3
2007	8	4	216	7	7.6	7.7	6	9.9	10.4	8.2	6.3	10.8	7.9
2007	8	5	217	6.6	7.5	7.6	6.1	10.1	11	9	5.9	9.8	7.3
2007	8	6	218	4.3	5.1	5	2.9	3.4	5.7	9	5.2	9.7	5
2007	8	7	219	4.5	4.9	4.8	2.9	3.3	5.1	7.5	5	8	5.3
2007	8	8	220	3.9	4.6	4.7	3.2	3.8	5.7	8.1	5	7.3	4.4
2007	8	9	221	6	6.6	7.3	5.8	7.8	9	8.7	6.1	7.4	6.5
2007	8	12	224	5.4	6.5	6.6	5.4	8	9.4	9.4	5.5	8.4	5.8
2007	8	13	225	5.5	6.4	6.6	5.3	7.8	8.6	8.6	5.1	8.6	6
2007	8	14	226	5.3	6.2	6.6	5.3	7.4	8.5	7.9	5.3	8.7	5.8
2007	8	15	227	5	6.1	6.2	5	7.9	8.5	7.5	5.3	7.8	5.4
2007	8	16	228	5	6	6.1	4.7	7.3	8.6	7.8	5.7	7.6	5.5
2007	8	17	229	5.7	6.3	6.7	5	7.5	8.6	7.5	4.8	7.4	6.3
2007	8	18	230	5.5	6	6.1	4.4	7.1	7.8	6.4	5.5	9.3	6.3
2007	8	19	231	5.8	6.5	7	5.4	8.2	9.1	7.3	5.4	9	6.5
2007	8	20	232	5.1	6	6.5	5.6	7.5	7.7	7.1	5	8	5.5
2007	8	21	233	5	5.8	6.6	5.5	7.2	8.1	7	5.2	8.1	5.4
2007	8	22	234	4.9	6	6.2	5	7.9	8.6	7	5.1	8.9	5.3
2007	8	23	235	5.6	6.3	6.7	4.8	7.9	9.2	7	5.6	8.9	6.3
2007	8	24	236	5.6	6.5	6.6	4.8	8.7	9.2	7.5	5.3	8	6.3
2007	8	25	237	5	5.9	6.2	5	7.7	8.4	7.3	6.3	8.6	5.4
2007	8	26	238	5.1	6.2	6.5	5.2	7.9	9.2	8.1	5.7	8.6	5.5
2007	8	27	239	4.8	5.7	6.1	5	7.5	8.1	6.7	4.5	8.3	5.2
2007	8	28	240	4.6	5.7	6	4.8	7.4	8.3	6.9	4.6	12	4.9
2007	8	29	241	4.6	5.6	6.1	5	7.2	8.3	6.9	4.7	8.9	4.9
2007	8	30	242	4.8	5.7	6.2	4.9	7.3	8.4	7.2	5.2	8.8	5.2
2007	8	31	243	4.7	5.8	6.2	5.1	7.6	8.7	7.2	5.1	8.5	5.1
2007	9	1	244	4.6	5.6	5.7	4.3	7.3	8.3	7.3	5.4	9.5	5
2007	9	2	245	4.5	5.7	5.6	4.4	7.6	8.6	7.5	6.2	9.3	4.9
2007	9	3	246	5.2	6.2	6.5	5	8.2	9.5	8	5.7	9.2	5.7
2007	9	4	247	4.9	6	6.2	4.9	7.7	9	8.3	4.9	8.7	5.3
2007	9	5	248	5.4	6.3	6.7	5.2	8.4	9.8	8	4.8	9.5	5.9
2007	9	6	249	4.9	6	6.1	4.5	8.5	9.5	7.4	4.6	10	5.4
2007	9	7	250	5.6	6.4	6.6	4.2	8.7	10.3	8.2	5.1	9.5	6.4
2007	9	8	251	5.5	6.2	6.4	4	8.1	9.5	6.5	3.6	8.1	6.5
2007	9	9	252	4.9	5.5	5.6	3.8	7.3	7.5	4.8	3.6	8.2	5.6
2007	9	10	253	4.1	5	5.1	3.9	6.9	6.9	4.9	3.6	6.9	4.5
2007	9	11	254	4.3	5.2	5.5	4.2	7.3	7.8	5.8	4.4	7.4	4.7
2007	9	12	255	4.2	5.1	5.7	4.8	6.6	7.5	6	4.1	8.3	4.4
2007	9	13	256	4.2	5.1	5.7	4.6	6.9	7.8	5.8	4.1	7.6	4.5
2007	9	14	257	4.6	5.2	6	4.4	6.8	8	5.4	4.6	7.2	5.1
2007	9	15	258	3.9	4.9	5.3	4.4	6.6	7.3	5.9	4.6	8.1	4.1
2007	9	16	259	4.2	5	5.5	4.5	6.6	7.4	6	3.9	8.4	4.4
2007	9	17	260	4.6	5.1	5.7	4.2	6.6	7.3	5.2	4.5	7.8	5.2
2007	9	18	261	3.3	4.4	4.6	3.8	5.8	6.5	5.6	5	8.1	3.5
2007	9	19	262	3.3	4.4	4.3	3.4	5.4	6	6.2	4	7.9	3.5
2007	9	20	263	3.6	4.8	4.8	3.7	6.7	7.1	6	3.6	8.3	3.9
2007	9	21	264	3.3	4.3	4.3	3.4	6.1	6.2	4.9	5.4	7.9	3.6
2007	9	22	265	3.7	4.8	4.9	3.8	6.6	7.2	6.3	4	7.9	4
2007	9	23	266	3.7	4.6	4.7	3.4	5.4	6.2	6.3	4	8.5	4
2007	9	24	267	4.4	5	5.5	4.2	6.2	6.6	5.7	3.5	8.5	4.9
2007	9	25	268	3.6	4.4	4.6	3.5	6	5.6	4.4	2.9	8.4	4
2007	9	26	269	3.3	4.3	4.3	3.5	6.2	5.8	4.8	3.6	8	3.5
2007	9	27	270	3.5	4.5	4.6	3.8	6.2	6.4	5.4	4.1	8.8	3.7
2007	9	28	271	3.4	4.4	4.4	3.6	6	6.1	5.8	3.6	8.9	3.6
2007	9	29	272	3.6	4.5	4.6	3.8	5.9	6.1	6.1	4.1	8.5	3.9
2007	9	30	273	3.6	4.4	4.8	4	5.7	6.2	5.7	3.8	8.7	3.8
2007	10	1	274	3.2	4.2	4.2	2.9	5.1	6	5.9	3.4	8.6	3.5
2007	10	2	275	2.5	3.7	3.5	2.4	3.8	4.9	5.6	3.3	8.3	2.8
2007	10	3	276	2.8	3.8	3.8	2.9	4.6	5	5.3	3.1	8.2	3
2007	10	7	280	2.1	3	2.9	1.7	2.1	2.9	3.8	2.9	6.9	2.3
2007	10	8	281	2	3.1	2.9	1.9	2.7	3.5	4.4	3	7.4	2.1
2007	10	9	282	2.8	3.8	3.8	2.8	5.9	5.8	4.5	3.5	7.4	3
2007	10	10	283	3.3	4	4.2	3	5.6	5.5	4.2	3	8.1	3.7
2007	10	11	284	3	3.8	3.9	2.9	5.4	5.4	4.6	3	7.6	3.3
2007	10	12	285	3	3.9	3.9	3	5.6	5.7	5.1	2.9	7.9	3.2
2007	10	13	286	2.7	3.7	3.7	2.7	5.3	5.5	4.5	2.9	7.4	3
2007	10	14	287	2.7	3.7	3.7	2.3	5.2	6	4.8	2.4	8.6	3.1
2007	10	15	288	3.1	3.8	3.9	2.1	4.9	5.8	4.1	2.5	7.9	3.6
2007	10	16	289	3.2	3.8	3.9	2.1	5	5.4	3.7	2.3	5	3.8
2007	10	17	290	2.7	3.2	3.2	1.9	4.2	3.6	2.3	2.5	5.1	3.1
2007	10	18	291	1.9	2.7	2.6	1.7	2.6	2.9	3	2.9	7.2	2.2
2007	10	19	292	2.6	3.3	3.4	2.2	4.5	4.5	3.6	2.5	7.6	2.9
2007	10	21	294	2.2	2.9	3	2.5	3.9	4	3.7	2.5	8.5	2.3
2007	10	22	295	2.4	2.9	3	2.8	4	3.3	3.8	2.5	7.9	2.4
2007	10	23	296	2.4	2.9	3.2	2.9	3.7	3.8	4	2.6	7.7	2.5
2007	10	24	297	2.4	2.6	2.8	2.9	3	2.7	4.3	2.9	9.6	2.4
2007	10	25	298	1.7	2	2	1.9	1.7	2.4	4.7	2.9	7.2	1.7
2007	10	26	299	1.9	2.3	2.4	2.1	2.1	2.6	4.5	2.4	8.9	2.1
2007	10	27	300	-999	-999	-999	-999	-999	-999	3.4	2.5	9.1	-999
2007	10	28	301	-999	-999	-999	-999	-999	-999	3.4	2.7	8.4	-999
2007	10	29	302	1.9	2.6	2.7	1.9	3.5	3.8	3.2	2.1	7.9	2
2007	10	30	303	1.8	2.4	2.6	1.9	3.3	3.7	2.8	2.1	8.5	1.9
2007	10	31	304	1.6	2	2.2	1.6	2.8	2.7	1.9	1.5	7.5	1.7
2007	11	1	305	1.8	2.1	2.4	1.6	2.7	3	2.1	1.9	-999	2
2007	11	2	306	1.8	2.3	2.5	1.6	3	3	2.4	2	-999	2.1
2007	11	3	307	2.3	2.7	2.9	1.6	3.3	3.4	2.7	1.7	-999	2.7
2007	11	4	308	1.7	2.1	2.3	1.6	2.8	2.7	2	1.9	-999	1.9
2007	11	5	309	1.4	2.1	2.1	1.5	2.9	2.8	2.4	1.8	-999	1.5
2007	11	6	310	1.5	2.2	2.2	1.6	3	3.1	2.8	1.6	-999	1.6
2007	11	7	311	1.9	2.4	2.6	1.6	3.2	3.5	2.6	1.4	-999	2.2
2007	11	8	312	1.4	1.8	1.9	1.1	1.3	1.7	1.9	1.2	-999	1.6
2007	11	9	313	1.6	1.8	1.9	0.8	0.1	0.7	1.6	1.2	-999	2
2007	11	10	314	1.1	1.6	1.6	1	0.8	1.2	1.8	1.7	-999	1.2
2007	11	11	315	1.8	2	2.2	1.2	1.8	2.4	2	1.3	-999	2.1
2007	11	12	316	1.4	1.7	1.9	1.2	2.5	2.1	1.3	1.4	-999	1.6
2007	11	13	317	1.2	1.6	1.7	1.3	2.6	2.1	1.6	1.4	-999	1.3
2007	11	15	319	1.2	2	2	1	3.1	3.1	2	1.4	-999	1.4
2007	11	16	320	1.1	1.9	1.9	1.1	2.7	2.8	2.3	1.5	-999	1.1
2007	11	17	321	1.1	1.8	1.7	1	1.6	1.8	2.1	1.4	-999	1.2
2007	11	18	322	1.1	1.6	1.7	1.3	2.4	2.5	2.2	1.4	-999	1.2
2007	11	19	323	1	1.6	1.7	1.1	2	2.3	2.2	1.4	-999	1.1
2007	11	20	324	1.2	1.7	1.8	1.1	2.1	2.5	2	1.1	-999	1.3
2007	11	21	325	1.2	1.6	1.8	1.1	2.6	2.7	1.6	1	-999	1.4
2007	11	22	326	1.1	1.7	1.7	0.8	2.5	2.1	1.3	1	-999	1.2
2007	11	23	327	1	1.5	1.5	0.8	1.8	1.2	1.2	1.1	-999	1.1
2007	11	24	328	0.8	1.1	1.1	0.9	1.3	0.9	1	1.1	-999	0.9
2007	11	25	329	0.8	1.2	1.2	0.8	1.2	0.8	1	1.4	-999	0.9
2007	11	26	330	0.8	1	1	0.8	0.9	0.7	1.1	1.1	-999	0.8
2007	11	27	331	0.7	0.9	0.9	0.8	0.4	0.4	1.3	1.1	-999	0.7
2007	11	28	332	0.8	1.1	1.2	0.7	0.9	0.7	1	0.7	-999	0.9
2007	11	29	333	0.9	1.1	1.2	0.6	0.2	0.3	0.8	0.9	-999	1
2007	11	30	334	0.9	1.3	1.4	0.7	2.1	1.5	1	1.4	-999	1
2007	12	1	335	1.3	1.7	1.8	0.7	2.4	2.2	1.5	1.1	-999	1.6
2007	12	2	336	1.1	1.5	1.5	0.7	1	0.9	0.9	0.9	-999	1.4
2007	12	3	337	1.1	1.4	1.4	0.6	1	0.8	0.7	1	-999	1.3
2007	12	4	338	1.1	1.4	1.5	0.6	1.5	1.2	0.9	0.9	-999	1.3
2007	12	5	339	1.7	1.9	2	0.7	0	0.3	0.9	0.8	-999	2.1
2007	12	6	340	2.1	2.2	2.4	0.6	2.6	2.7	1.4	0.8	-999	2.6
2007	12	7	341	1.1	1.5	1.5	0.7	1	0.9	1.1	0.7	-999	1.3
2007	12	8	342	0.8	1.4	1.3	0.7	0.3	0.5	1.1	0.9	-999	0.9
2007	12	9	343	0.7	1.2	1.2	0.6	1.6	1.1	1.2	0.9	-999	0.7
2007	12	10	344	0.8	1.2	1.3	0.7	2.1	1.5	1.1	0.6	-999	0.9
2007	12	11	345	0.8	1.3	1.2	0.7	0.1	0.4	1.3	0.8	-999	0.8
2007	12	12	346	0.9	1.3	1.4	0.7	0.6	1.1	1.5	0.9	-999	1
2007	12	13	347	0.8	1.1	1.1	0.7	0.2	0.6	1.7	1.1	-999	0.9
2007	12	14	348	0.8	1	1	0.7	0.5	0.6	1.3	0.8	-999	0.9
2007	12	15	349	0.7	1.1	1	0.7	0.1	0.4	1.3	1	-999	0.8
2007	12	16	350	0.7	1.1	1.1	0.7	0.2	0.4	1.1	0.9	-999	0.8
2007	12	17	351	0.9	1.2	1.3	0.6	1.8	1.1	0.9	0.7	-999	1.1
2007	12	18	352	1.2	1.4	1.5	0.5	1.3	0.9	0.7	0.6	-999	1.4
2007	12	19	353	1	1.2	1.3	0.5	1.6	0.4	0.3	0.5	-999	1.2
2007	12	20	354	0.7	1	1.1	0.5	1.8	0.6	0.5	0.8	-999	0.8
2007	12	21	355	0.6	1.1	1.1	0.5	1.5	0.7	0.5	0.7	-999	0.7
2007	12	22	356	0.7	1.2	1.2	0.4	2	0.9	0.6	0.9	-999	0.8
2007	12	23	357	0.6	1.1	1.1	0.5	1.9	0.9	0.7	0.8	-999	0.7
2007	12	24	358	0.6	1.2	1.2	0.5	2.1	1.3	0.9	0.9	-999	0.7
2007	12	25	359	0.6	1.2	1.2	0.5	2	1.5	1.2	1.2	-999	0.7
2007	12	26	360	0.7	1.2	1.2	0.6	1.3	0.9	1.1	0.9	-999	0.8
2007	12	27	361	0.6	0.9	0.9	0.6	1.3	0.4	0.7	0.8	-999	0.7
2007	12	28	362	0.6	1	1	0.6	1.6	0.4	0.7	0.8	-999	0.7
2007	12	29	363	0.6	0.8	0.8	0.6	0.7	0.1	0.6	0.7	-999	0.7
2007	12	30	364	0.6	0.7	0.7	0.6	0	0.1	0.8	0.9	-999	0.6
2007	12	31	365	0.6	0.7	0.7	0.6	-0.1	0	0.7	0.9	-999	0.6
2008	1	1	1	0.7	0.9	0.9	0.6	0.3	0.2	0.7	1	-999	0.8
2008	1	12	12	0.5	0.5	0.5	0.5	0.1	-0.3	0.3	0.7	-999	0.5
2008	1	13	13	0.6	0.8	0.8	0.6	1	-0.3	0.2	0.4	-999	0.6
2008	1	14	14	0.6	0.9	0.9	0.7	1.3	0	0.3	0.6	-999	0.7
2008	1	18	18	0.7	0.9	0.9	0.7	0.2	0.3	0.8	0.9	-999	0.7
2008	1	19	19	0.7	1	1	0.7	-0.2	0.2	1	1.2	-999	0.8
2008	1	20	20	0.8	1	1.1	1	1.6	0.4	0.7	0.8	-999	0.8
2008	1	21	21	0.7	0.8	0.8	0.8	0.5	0.2	0.9	1	-999	0.7
2008	1	22	22	0.7	0.8	0.8	0.6	-0.1	0.1	1	1.3	-999	0.7
2008	1	23	23	0.8	1	1	0.8	0.5	0.3	1	0.9	-999	0.9
2008	1	27	27	1	1.2	1.2	1	1.5	0.5	0.8	1.2	-999	1
2008	1	28	28	0.9	1.2	1.3	1.1	1.8	0.2	0.6	0.6	-999	1
2008	1	29	29	1.1	1.4	1.5	1.1	2	1	0.8	0.7	-999	1.2
2008	1	30	30	1	1.2	1.3	1	1.6	0.6	0.6	0.8	-999	1.1
2008	1	31	31	0.7	0.9	0.9	0.9	1	0	0.4	0.7	-999	0.8
2008	2	1	32	0.4	0.5	0.5	0.5	-0.2	-0.2	0.3	0.8	-999	0.5
2008	2	2	33	0.6	0.9	0.9	0.6	-0.1	-0.1	0.4	0.8	-999	0.7
2008	2	3	34	0.9	1.1	1.2	1.1	1.5	-0.1	0.4	1	-999	0.9
2008	2	4	35	0.8	0.9	0.9	1	0.8	0.2	0.8	1	-999	0.8
2008	2	5	36	0.7	0.8	0.8	0.8	0.2	0.2	0.8	1	-999	0.7
2008	2	6	37	0.8	1	1.1	0.9	0.4	0.3	1.1	1.4	-999	0.9
2008	2	8	39	0.9	1.1	1.1	1.2	1.1	0.3	0.9	1.1	-999	1
2008	2	9	40	0.8	1	0.9	1	0.8	0.3	0.9	1.1	-999	0.9
2008	2	13	44	1.3	1.5	1.6	1.3	1.6	1.1	1	1.4	-999	1.4
2008	2	14	45	1.1	1.4	1.5	1.3	1.5	0.8	0.8	0.9	-999	1.2
2008	2	15	46	1.2	1.4	1.6	1.3	1.9	0.3	0.4	1.1	-999	1.3
2008	2	16	47	1.1	1.4	1.5	1.4	1.7	0.3	0.6	1	-999	1.2
2008	2	21	52	1.3	1.5	1.7	1.5	2	0.5	0.4	1.1	-999	1.4
2008	2	22	53	1.6	1.9	2.1	1.7	2.4	1	0.7	1.4	-999	1.8
2008	2	23	54	1.7	2	2.2	1.8	2.6	1.4	1.2	1.5	-999	1.9
2008	2	24	55	1.9	2.3	2.4	1.7	2.7	1.6	1.2	1.2	-999	2.2
2008	2	26	57	2	2.1	2.3	1.5	1.8	1.7	1.1	1.6	-999	2.4
2008	2	27	58	1.7	2	2.2	1.8	2.2	1.7	1.4	1.8	-999	1.9
2008	2	28	59	1.6	2	2.1	1.8	2.1	1.4	1.8	1.9	-999	1.8
2008	2	29	60	1.8	2.1	2.3	1.9	2.3	2.2	2	1.9	-999	1.9
2008	3	2	61	1.9	2.2	2.4	2.1	2.6	2.1	1.9	1.9	-999	2
2008	3	3	62	1.6	1.9	2	1.8	2	1.5	1.4	1.6	-999	1.7
2008	3	4	63	1.9	2.5	2.6	2	3.4	2.2	1.3	1.8	-999	2.1
2008	3	5	64	2.2	2.8	2.9	2.2	3.7	3.2	2	2.5	-999	2.3
2008	3	6	65	1.6	2.2	2.2	1.1	0.4	1.3	2.7	2.6	-999	1.9
2008	3	7	66	2.2	2.9	2.9	2.1	3.2	3.1	3.1	2.4	-999	2.4
2008	3	8	67	2.9	3.3	3.5	2.1	3.1	3.5	3.2	2.7	-999	3.4
2008	3	9	68	2.9	3.6	3.8	2.9	4.7	4.5	3.6	2.8	-999	3.2
2008	3	11	70	2.9	3.2	3.7	3.2	4	3.6	3.2	2.4	-999	3.1
2008	3	12	71	2.4	2.8	3.1	2.8	3.5	3	2.3	2.2	-999	2.6
2008	3	13	72	2.1	2.4	2.7	2.1	2.4	2.5	2.2	2	-999	2.3
2008	3	14	73	2	2.4	2.6	2.2	2.9	2.2	1.3	1.6	-999	2.1
2008	3	15	74	2	2.4	2.7	2.2	3	2.1	1.1	1.8	-999	2.2
2008	3	16	75	1.9	2.3	2.3	2.1	2.5	1.4	1.5	2.2	-999	2
2008	3	17	76	1.4	1.9	1.9	1.2	0.7	1.2	1.9	2.3	-999	1.6
2008	3	18	77	2.8	3.2	3.7	3	4.1	3.6	2.3	2.6	-999	3.1
2008	3	19	78	2.4	2.6	2.8	2.1	2.2	2.8	2.9	2.7	-999	2.7
2008	3	21	80	2.8	3.1	3.6	2.7	3.5	3.5	2.3	2.1	-999	3.2
2008	3	22	81	3.2	3.6	3.9	2.9	4.1	3.9	3.5	3	-999	3.5
2008	3	23	82	4	4.1	4.7	3.1	4.2	5.2	4.2	3.6	-999	4.6
2008	3	24	83	3.3	3.5	3.8	2.7	2.9	4.3	4.9	3.6	-999	3.8
2008	3	25	84	3.6	4.1	4.5	3.4	4.5	4.9	4.5	3	-999	4
2008	3	26	85	2.8	3.4	3.5	2.8	3.7	3.3	3.1	3	-999	3.1
2008	3	27	86	2.7	3.1	3.4	3.3	3.4	2.5	2.9	3	-999	2.9
2008	3	28	87	3.1	3.5	4.1	3.6	4.4	3.9	2.7	2.9	-999	3.3
2008	3	29	88	3.1	3.4	3.9	3.4	4	4	3.3	3.4	-999	3.3
2008	3	30	89	2.8	2.9	3.2	2.4	2.4	3.3	3.9	3.5	-999	3.2
2008	3	31	90	2.3	2.2	2.4	1.2	0.4	1.6	2.9	2.8	-999	2.8
2008	4	1	91	1.6	1.9	1.9	1.6	1.1	1.5	2.1	2	3.1	1.8
2008	4	2	92	2.8	3.1	3.6	2.9	3.6	2.8	1.8	2.7	2.4	3
2008	4	3	93	1.9	2.1	2.2	1.6	1.2	1.9	2.5	3	2.7	2.2
2008	4	4	94	2.6	3	3.3	2.9	3.2	3.2	2.8	2.7	4.4	2.8
2008	4	5	95	2.7	3	3.4	2.9	3.2	3	2.6	3.1	2.4	2.9
2008	4	6	96	4.2	4.6	5.2	3.6	5.6	5.4	3.2	3.4	2.1	4.8
2008	4	7	97	2.7	3.1	3.5	2.7	3.1	3.4	2.7	2.7	5.2	3
2008	4	8	98	2.9	3.4	3.6	3.2	3.9	2.8	2.7	3.1	2.5	3
2008	4	9	99	2.2	2.5	2.7	2.4	2.3	2.1	2.6	3.1	3.5	2.3
2008	4	10	100	3.3	3.9	4.4	3.9	4.9	4.1	2.8	3	4.2	3.5
2008	4	11	101	3.7	4.1	4.8	4	4.8	4.7	3.6	3.3	4.4	4
2008	4	12	102	3.4	4	4.5	3.7	4.7	4.6	3.6	3.4	3.7	3.7
2008	4	13	103	2.6	2.8	2.9	1.8	1.4	2.6	4.3	4.5	4.3	3.1
2008	4	14	104	4.2	4.9	5.3	4.2	5.8	6.1	5.7	4.7	6.3	4.6
2008	4	15	105	3.9	4.7	4.8	4	5.1	5.2	6.3	4.1	8.7	4.2
2008	4	17	107	3.5	4	4.5	3.9	4.7	4	3.3	3.8	6.1	3.8
2008	4	18	108	3.2	3.6	4.1	4.1	4	2.7	3.1	3.9	8.9	3.4
2008	4	19	109	3.3	3.7	4.1	3.9	4	3.4	4	3.4	6.7	3.4
2008	4	20	110	3.6	4	4.6	4.2	4.8	3.9	3.4	4.4	7.3	3.8
2008	4	21	111	3.4	3.8	4.2	3.8	3.7	4.2	5.2	4.6	9.8	3.7
2008	4	22	112	3.8	4.1	4.6	3.7	3.9	5.3	6	4.8	6.6	4.2
2008	4	23	113	2	2.6	2.6	1.9	1.3	3.5	7.3	4.8	8.5	2.2
2008	4	24	114	5.5	5.9	6.9	4.9	6.6	8.8	7.2	5.1	5.8	6.2
2008	4	25	115	5.5	6.2	6.9	5.3	7.6	8.7	7.2	5.2	8.5	6.1
2008	4	26	116	4.4	5.4	5.6	4.4	6.1	7.2	7.3	4.5	10.3	4.8
2008	4	27	117	4.9	5.4	5.8	4.1	6	6.9	6	4.5	9	5.5
2008	4	28	118	4.2	4.8	5.5	4.4	5.3	6.7	5.7	4.3	5.1	4.5
2008	4	29	119	3.8	4.6	4.9	4	5.9	5.4	3.5	3.5	5.2	4.1
2008	4	30	120	3.2	3.8	4.3	3.4	4.2	4.5	3.5	3.1	4.6	3.5
2008	5	1	121	2.8	3.3	3.7	3	3.3	3.8	3.3	3.7	0.6	3
2008	5	2	122	4.5	5.1	6.1	4.8	6.3	6.6	4.1	3.9	4.8	4.9
2008	5	3	123	3.9	4.2	4.9	3.6	4.3	5.2	4	3.9	5.6	4.5
2008	5	4	124	4.1	4.3	4.5	2.8	3.5	4.2	3.6	3.9	2.2	4.9
2008	5	5	125	4.4	5	5.3	3.8	5.5	5.9	4.7	4.1	5.1	4.9
2008	5	6	126	3.8	4.4	4.6	3.6	5.2	4.5	3.2	3.9	5.9	4.2
2008	5	7	127	3.9	4.7	4.9	4.1	6.3	5	2.7	3.7	5.9	4.3
2008	5	8	128	3.9	4.5	5.1	4.4	5.7	4.5	2.9	2.9	4.2	4.1
2008	5	9	129	3.5	4	4.7	4.1	4.7	3.9	2.5	2.8	2.4	3.7
2008	5	10	130	3.6	4.1	4.8	4.3	5	3.9	2.7	3.4	1.7	3.8
2008	5	11	131	3.7	4.2	4.7	4.5	4.8	3.2	3.3	3.5	5.3	3.8
2008	5	12	132	4.4	5	6	5.1	5.9	5.3	3.8	3.6	5.2	4.8
2008	5	13	133	4.3	4.8	5.6	4.9	5.9	5.3	3.7	4.1	7.6	4.5
2008	5	14	134	3.7	4.2	4.7	4.4	4.9	3.9	3.8	4.4	7.1	3.8
2008	5	15	135	4.4	5.1	5.8	5	6.3	5.7	4	3.5	7.1	4.6
2008	5	16	136	4	4.7	4.9	4.1	5.7	5.1	4.1	4.5	2	4.3
2008	5	17	137	5.3	5.9	6.3	5	7.4	6.7	4.8	4.2	5.4	5.9
2008	5	18	138	4.6	5.3	5.3	4.1	6.2	5.6	4	4.2	6.1	5.1
2008	5	19	139	5.5	6.1	6.3	4.7	7.6	7.3	4.7	4.7	4.7	6.3
2008	5	20	140	5.3	5.9	6.3	5	7.2	7.2	5.5	5.4	7.3	5.9
2008	5	21	141	5.3	5.8	6.9	5.4	6.9	8.1	6.4	5.1	9.8	5.7
2008	5	22	142	5.3	6	7	5.7	7.2	8.5	6.9	5.8	10.6	5.7
2008	5	23	143	5.8	6.3	7.5	5.7	7.1	9.2	7.6	5.3	10.3	6.4
2008	5	24	144	4.3	4.8	5.2	3.8	4.4	6.2	7.6	5.3	9.2	4.8
2008	5	25	145	4.7	5.6	6	5.1	6.8	7	5.8	3.9	8.2	5
2008	5	26	146	4.7	5.3	6.1	4.9	6.3	6.7	4.8	4.3	7.5	5.1
2008	5	27	147	5.6	6.1	6.8	5.1	7.4	7.4	4.8	5.2	5.7	6.3
2008	5	28	148	5.9	6.1	7.6	5.3	7	8.2	5.3	5.1	6.3	6.7
2008	5	29	149	5.7	6	7.4	5.5	7.1	8.6	6.1	5.8	9.3	6.4
2008	5	30	150	4.7	5	5.9	4.5	5.6	6.7	5.1	5.2	9.1	5.2
2008	5	31	151	4.9	5.5	5.7	4.4	6.3	6.7	5.5	5.7	9.2	5.5
2008	6	1	152	5.7	6.3	6.8	5.1	7.5	8.5	6.6	5.6	8.2	6.4
2008	6	2	153	5.5	6.1	7.1	5.7	7	8.6	7.6	5.5	7	5.9
2008	6	3	154	5	5.5	6.5	5.5	6.3	7	6.1	5.2	10.5	5.3
2008	6	4	155	5.1	5.6	6.4	5.3	6.6	6.9	5.7	5.8	9.5	5.6
2008	6	5	156	6.7	7	8.8	6.2	8.2	10.1	6.7	5.7	9.5	7.6
2008	6	6	157	5.5	6.1	7.3	6	7.3	8.8	7	5.1	8.9	5.8
2008	6	7	158	5	5.8	6.7	5.9	7	7.4	6.1	5.1	7.9	5.2
2008	6	8	159	5	6	6.4	5.7	8	8	6	5.7	7.6	5.3
2008	6	9	160	5.2	6	6.9	6	7.4	8.1	6.6	5.4	9	5.5
2008	6	10	161	5.7	6.3	7.5	6.3	7.5	8.5	6.9	5.1	10.1	6
2008	6	11	162	5.9	6.2	7.7	5.6	7.3	8.4	5.4	5.2	7.8	6.6
2008	6	12	163	5.5	6	7	5.3	7.2	7.6	5.1	4.8	6.2	6.2
2008	6	13	164	5.5	6	6.9	5.7	7.5	7.4	5.5	5.4	7.9	6
2008	6	14	165	5.6	6.3	7.2	6.2	7.7	8	6.6	5.9	8.3	5.9
2008	6	15	166	5.8	6.6	7.2	6.1	8.3	8.7	7	6.1	8.8	6.2
2008	6	16	167	5.9	6.6	7.1	5.8	8.2	8.4	6.9	6	9.3	6.4
2008	6	17	168	6.7	6.9	7.9	5.7	8.3	9.2	6.4	6.4	9	7.6
2008	6	18	169	7.7	7.6	8.8	5.8	8.7	10.3	6.9	6.3	8.9	9
2008	6	19	170	6.5	6.8	8.1	6	8	9.8	7.2	6.6	9.4	7.3
2008	6	20	171	6.4	6.8	7.9	5.8	7.9	10.3	8.2	6.8	10	7.2
2008	6	21	172	6	6.8	7.8	6.4	8.4	10	8	6.4	11	6.5
2008	6	22	173	5.1	6	6.4	5.1	7.1	8.2	7.2	5.9	8.9	5.6
2008	6	23	174	5.5	6.1	6.8	5.5	7.3	8.1	6.8	6.4	9.9	6
2008	6	24	175	5.2	5.9	6.8	5.6	7.1	8.6	7.1	6.4	10.5	5.5
2008	6	25	176	5.7	6.4	7.4	6	7.4	9.2	8.2	7.1	12.8	6.2
2008	6	26	177	6.5	7	7.9	6.1	8	10.1	9.1	7	11.7	7.2
2008	6	27	178	7.1	7.4	8.9	6.5	7.9	11.3	10.3	6.8	13.7	8
2008	6	28	179	7.3	7.4	9	6.2	7.7	10.9	9.6	6.5	12.1	8.3
2008	6	29	180	5.7	6.2	7	5.6	6.6	8.4	9	6.5	13	6.3
2008	6	30	181	5.9	6.3	7.1	5.5	6.8	8.4	8.1	6.4	12.6	6.5
2008	7	1	182	4.9	5.2	5.8	4.4	5.2	6.8	7	6.7	12.5	5.5
2008	7	2	183	5.2	6	6.8	5.7	7	8.5	7.8	6.7	15	5.6
2008	7	3	184	6.2	6.6	8	6.1	7.7	9.8	7.7	6.1	10.6	6.9
2008	7	4	185	6.3	6.5	7.6	5.5	7.7	9.5	6.8	6.4	12	7.1
2008	7	5	186	5.3	6	6.5	5.1	6.8	8.2	7.8	6.4	11.1	5.9
2008	7	6	187	5.4	6.4	6.9	5.8	7.9	9.2	8.5	6.1	11.6	5.7
2008	7	7	188	5.8	6.5	7.6	6.4	7.6	9.2	8.1	5.9	13.1	6.2
2008	7	8	189	5.7	6.2	7.2	5.5	7.5	8.8	6.5	6.1	11.9	6.3
2008	7	9	190	6	6.6	7.5	5.9	7.9	9.4	7.9	6.8	11.4	6.6
2008	7	10	191	5.7	6.5	7.2	5.8	7.5	9.5	9	6.2	13.2	6.2
2008	7	11	192	5.8	6.6	7.4	5.9	7.7	9.7	9.3	6.2	12.9	6.3
2008	7	12	193	5.7	6.5	7.3	5.9	7.5	9.9	9.5	7	13.2	6.2
2008	7	13	194	5.8	6.4	6.9	5.1	7.1	9.2	8.8	5.7	10.8	6.4
2008	7	14	195	6	6.6	7.3	5.4	7.5	9.5	8.3	5.9	2.9	6.7
2008	7	16	197	5.4	6.2	6.5	5.6	7.2	7.8	8.4	7.2	6	5.7
2008	7	17	198	5.8	6.7	7.2	6.4	7.6	8.6	9.9	6.3	7.1	6.2
2008	7	18	199	5.6	6.5	6.8	5.8	7.7	8.6	8.8	6.2	5.9	6
2008	7	19	200	5.7	6.5	7.3	6	7.4	9.5	9.3	6.9	8.8	6.1
2008	7	20	201	5.6	6.6	7.2	5.9	7.5	9.8	10.4	6.8	5.4	6
2008	7	21	202	5.8	6.7	7.4	5.9	7.6	9.9	10.1	6	4.7	6.3
2008	7	22	203	6.9	7.1	8.4	5.9	7.6	10.4	9.2	5.7	3.5	7.8
2008	7	23	204	7.9	7.9	8.5	5.4	8.3	11.1	9.7	6.4	4.2	9.3
2008	7	24	205	6.1	6.4	7.4	5	6.3	9.7	9.9	5.9	4.6	7
2008	7	25	206	6.4	6.5	7.5	4.8	6	9.7	10.2	5.7	6.5	7.3
2008	7	26	207	5.2	5.6	6.4	4.7	5.4	8.4	9.5	5.9	5.5	5.8
2008	7	28	209	6.5	6.6	7.6	5.1	7	9.5	7.9	6.4	7.2	7.6
2008	7	29	210	6.2	6.6	7.9	5.8	7.1	10.3	9	6.1	12.8	6.9
2008	7	31	212	5.1	5.9	6.5	5.1	6.3	8.7	9.3	7.1	13.6	5.6
2008	8	1	213	5.5	6.3	6.5	4.6	6.7	8.9	9.6	5.8	12.9	6.2
2008	8	2	214	5.8	6.4	6.4	4.2	6.6	8.7	8.6	5.1	9.7	6.7
2008	8	3	215	5.6	6.2	6.6	4.7	6.8	8.8	8.5	5.9	8.2	6.3
2008	8	4	216	6.1	6.6	7.5	5.2	7	10	9.2	5.8	9.8	6.9
2008	8	5	217	6.5	6.6	7.8	5.2	6.6	10	9.2	6.1	9.4	7.5
2008	8	6	218	6.4	6.6	7.7	5.4	6.8	9.5	8.8	5.5	8.9	7.3
2008	8	7	219	6.1	6.4	7.3	5	6.5	9.3	8.7	5.7	12.7	7
2008	8	8	220	5.7	6.1	7.1	5.2	6.7	9	7.9	5.8	13.4	6.4
2008	8	9	221	5.4	5.9	6.9	5.3	6.5	8.8	8.2	6.4	15.5	6
2008	8	10	222	5.9	6.2	7.3	5.5	6.6	8.7	8.3	5.5	13.5	6.5
2008	8	11	223	5.5	6	6.9	5.3	6.5	8.5	8.4	5.8	14.1	6.1
2008	8	12	224	5.2	5.9	6.7	5.2	6.4	8.6	8.6	5.2	14	5.7
2008	8	13	225	5.5	5.8	6.9	4.9	6.1	8.4	7.3	5.2	12.5	6.2
2008	8	14	226	5.9	5.9	7.1	4.8	6.1	8.9	7.7	5.7	13.3	6.7
2008	8	15	227	5.7	6.2	6.6	4.5	6.7	8.8	8	5.6	11.3	6.5
2008	8	16	228	5.5	5.9	6.4	4.3	6.1	8.1	7.4	4.8	12.5	6.4
2008	8	17	229	5.7	6.1	6.8	4.7	6.4	8.8	8.2	5	13.5	6.4
2008	8	18	230	5	5.7	6.5	5.1	6.3	8.4	8.4	5.1	14	5.5
2008	8	19	231	5.4	6.1	6.7	5.1	6.6	8.8	9.1	6	14.3	5.9
2008	8	20	232	5.4	6.1	6.9	5.4	6.5	9	9.4	5.4	14.5	5.9
2008	8	21	233	5.4	5.9	6.9	5.2	6.3	8.9	8.8	5.4	14.7	5.9
2008	8	22	234	5.2	5.9	6.6	5.4	6.2	8.2	9.2	5.6	15.1	5.6
2008	8	23	235	5.5	6.1	6.8	5.4	6.3	8.3	9.5	5.1	15.3	6
2008	8	24	236	4.4	5.2	5.5	4.1	6	7.2	6.7	4.8	14.3	4.8
2008	8	25	237	5.3	5.9	6	3.9	6.3	8.1	7.9	5.3	10.5	6.1
2008	8	26	238	5.7	6.1	6.5	4.2	6.2	8.6	8.6	5.8	12.4	6.6
2008	8	27	239	5.2	5.8	6.3	4.3	6.1	8.6	8.3	5.2	13	5.9
2008	8	28	240	4.3	5.2	5.3	3.4	4.8	7.2	9	5.6	15.1	4.9
2008	8	29	241	4.7	5.5	5.9	4.6	5.6	7.7	9.6	5.3	15.7	5.1
2008	8	30	242	4.1	4.9	5	3.7	4.7	6.4	8.5	4.2	14.5	4.5
2008	8	31	243	4.5	5.1	5.7	4.1	5.5	7.3	7.2	4.6	13.9	5
[truncated: 3,366 more rows]

## Sheet: 10 Yyears ave. ETo-PM
					PM ETo values
	MON	DAY	DOY	2008	2009	2010	2011	2012	2013	2014	2015	2016	2017	Average
	1	1	1	0.7	0.5	0.8	0.7	0.7	0.7	0.8	0.7	0.5	0.5	0.66
	1	2	2	0.5	0.5	0.8	0.8	0.7	0.7	1	0.7	0.5	0.5	0.67
	1	3	3	0.6	0.8	0.9	0.7	0.9	0.8	1.3	1	0.7	0.7	0.84
	1	4	4	0.6	0.7	0.9	1.3	1	0.7	1.1	0.8	0.5	0.5	0.81
	1	5	5	0.7	0.7	0.6	1	0.5	0.6	0.9	0.7	0.6	0.6	0.69
	1	6	6	0.7	0.8	0.8	0.7	0.8	0.7	0.8	0.7	0.7	0.7	0.74
	1	7	7	0.8	0.7	0.9	0.8	0.6	0.6	0.8	0.6	0.5	0.5	0.68
	1	8	8	0.7	0.8	1.3	0.7	0.9	0.6	1	0.8	0.6	0.6	0.8
	1	9	9	0.7	0.7	1.2	0.7	1	0.5	1	0.8	0.7	0.7	0.8
	1	10	10	0.8	0.6	1.8	0.7	1.4	0.5	0.7	0.8	0.7	0.7	0.87
	1	11	11	1	0.7	1.2	0.7	0.9	0.7	1	1	0.8	0.8	0.88
	1	12	12	0.9	0.7	1	0.8	0.8	0.6	1	1.1	0.9	0.9	0.87
	1	13	13	1.1	0.7	0.8	0.8	0.7	0.7	0.6	1	0.8	0.8	0.8
	1	14	14	1	1	0.8	0.7	0.7	0.9	0.7	1.1	0.8	0.8	0.85
	1	15	15	0.7	1.2	0.7	0.8	0.7	1.1	0.7	1.1	1.1	1.1	0.92
	1	16	16	0.4	1.5	0.7	1	0.8	1	0.8	1	1.3	1.3	0.98
	1	17	17	0.6	1.3	0.9	0.9	0.8	1	0.9	1	1.4	1.4	1.02
	1	18	18	0.9	1.3	1.2	0.9	0.7	1.1	1	1.3	1.1	1.1	1.06
	1	19	19	0.8	1	1.1	0.8	0.7	0.9	1	1.2	0.8	0.8	0.91
	1	20	20	0.7	1	1	1.1	0.7	0.9	1	1.2	0.7	0.7	0.9
	1	21	21	0.8	1.1	1.1	1.3	0.9	1.4	1	1.3	1	1	1.09
	1	22	22	0.9	1.4	0.9	1	0.8	2.2	0.9	1.1	1.4	1.4	1.2
	1	23	23	0.8	1.2	1.2	0.9	1.1	1.3	0.9	1.1	1	1	1.05
	1	24	24	1.3	1.3	1.2	0.9	0.7	2.4	1.1	1.2	1.1	1.1	1.23
	1	25	25	1.1	0.7	1	1	0.7	1.2	0.9	1.3	0.6	0.6	0.91
	1	26	26	1.2	1	0.8	0.6	0.8	1	0.7	1.3	0.7	0.7	0.88
	1	27	27	1.1	0.6	1	0.6	1	0.7	0.7	1.4	0.7	0.7	0.85
	1	28	28	1.3	0.8	1	0.7	0.9	1	0.8	0.9	0.7	0.7	0.88
	1	29	29	1.6	1.2	0.9	0.9	1	1.3	0.8	1.4	0.9	0.9	1.09
	1	30	30	1.7	1.1	1.1	0.7	1	1.3	0.9	1.3	1.2	1.2	1.15
	1	31	31	1.9	0.9	1.3	0.8	0.8	0.9	1.3	1.1	1	1	1.1
	2	1	32	2	0.9	1.8	0.9	0.9	1.2	1.1	0.9	1	1	1.17
	2	2	33	1.7	1	1.6	1	0.6	1.1	1	1.5	0.6	0.6	1.07
	2	3	34	1.6	1.4	1.4	1.4	0.8	1.3	1.1	0.7	1.4	1.4	1.25
	2	4	35	1.8	1.7	1.6	0.9	1	1.5	1	1.1	1.8	1.8	1.42
	2	5	36	1.9	0.9	1.4	1.1	0.9	1.3	1.1	1	1.3	1.3	1.22
	2	6	37	1.6	1.4	1.6	1.4	1.1	1.1	1.3	1.7	0.9	0.9	1.3
	2	7	38	1.9	1.5	1.7	1.2	1.1	0.9	1.3	1.8	0.8	0.8	1.3
	2	8	39	2.2	1.7	1.7	1.4	0.8	1.7	1.4	1.3	1.2	1.2	1.46
	2	9	40	1.6	1.7	1.6	1.5	0.8	2.2	1.5	0.9	1.9	1.9	1.56
	2	10	41	2.2	1.5	1.6	1.3	0.8	1.2	1.6	1.9	1.3	1.3	1.47
	2	11	42	2.9	1.6	1.9	1.2	1	1.3	1.7	2.1	1.4	1.4	1.65
	2	12	43	2.9	1.2	2.1	1.2	0.8	1.3	1.6	1.8	1.3	1.3	1.55
	2	13	44	2.9	1.3	2.3	1	0.8	1.6	1.5	2.6	1.6	1.6	1.72
	2	14	45	2.4	1.7	1.6	0.9	1.2	1.5	1.4	1.7	1.4	1.4	1.52
	2	15	46	2.1	1.6	2.6	1.1	1.4	1.5	1.3	1.3	1.8	1.8	1.65
	2	16	47	2	1.7	2.6	1	1.2	1.4	1.1	1.7	1.8	1.8	1.63
	2	17	48	2	1.5	2.4	0.9	1	1.2	1.6	2.1	2	2	1.67
	2	18	49	1.9	1.6	2.7	1.6	0.7	1.3	1.9	2.1	2.2	2.2	1.82
	2	19	50	1.4	1.7	2.6	1.2	1	1.9	1.8	2.7	1.9	1.9	1.81
	2	20	51	2.8	1.8	2.9	1.5	0.8	1.8	2	2.4	2	2	2
	2	21	52	2.4	1.4	1.9	1.2	0.9	1.8	2	3.6	1.2	1.2	1.76
	2	22	53	2.8	1.4	2.9	1.6	1.7	1.6	2.4	2.9	1	1	1.93
	2	23	54	3.2	1.6	2.5	1.3	1.6	1.2	2.2	2.5	0.9	0.9	1.79
	2	24	55	4	1.7	2.6	1.7	1.8	1.8	2.5	1.4	1.6	1.6	2.07
	2	25	56	3.3	1.8	2.4	1.4	1.5	2	1.9	2.2	1.3	1.3	1.91
	2	26	57	3.6	1.8	2.9	1.4	1.9	2.2	2.6	2.4	2.1	2.1	2.3
	2	27	58	2.8	1.9	2.4	1.4	1.7	2.5	1.9	2.7	2.2	2.2	2.17
	2	28	59	2.7	1.7	2.5	1.2	1.5	2.1	1.7	1.9	2.4	2.4	2.01
	3	1	60	3.1	1.3	2.4	1.9	1.5	2.2	1.6	1.7	2.3	2.3	2.03
	3	2	61	3.1	0.8	2.5	2	1.2	1.8	1.5	2.4	2.5	2.5	2.03
	3	3	62	2.8	0.8	2.5	2	1.3	1.5	1.4	2	2.7	2.7	1.97
	3	4	63	2.3	1.5	2.6	2.1	1.3	2.1	1.4	2.1	2.3	2.3	2
	3	5	64	1.6	1.9	2.6	2.1	1.3	1.7	1.8	1.8	1	1	1.68
	3	6	65	2.8	2	2.5	2.7	1.3	1.7	2.2	1.5	2	2	2.07
	3	7	66	1.9	2.8	2.7	1.4	1.5	2.3	2.6	2.8	2.1	2.1	2.22
	3	8	67	2.6	2.5	2.9	1.3	0.9	1.9	2.5	2.2	2.5	2.5	2.18
	3	9	68	2.7	3.5	3.6	1.7	1.4	3.2	3.2	1.5	3.4	3.4	2.76
	3	10	69	4.2	2.7	3.6	1.4	1.6	3.2	1.3	2.9	3.2	3.2	2.73
	3	11	70	2.7	1.9	3.6	1.2	1.6	2.7	2.2	3.1	2.4	2.4	2.38
	3	12	71	2.9	2.6	3.9	2.1	1.6	2.4	1.4	2.1	1.8	1.8	2.26
	3	13	72	2.2	2.1	3.6	2.3	1.7	2.2	1.3	1.4	2.6	2.6	2.2
	3	14	73	3.3	2.2	3.7	1.2	2.2	2.3	1.5	2.7	2.8	2.8	2.47
	3	15	74	3.7	1.8	3.8	2.4	1.7	2.9	2.6	2.4	1.4	1.4	2.41
	3	16	75	3.4	1.6	3.3	3.4	1.6	1.8	2.2	3.4	1.6	1.6	2.39
	3	17	76	2.6	1.5	2.7	3.1	1.7	2	1	3.1	1.6	1.6	2.09
	3	18	77	4.2	0.9	2.7	2.8	1	1.7	1.3	2.8	2.4	2.4	2.22
	3	19	78	3.9	2.4	2.5	2.5	1.1	3	2.9	2.5	2.6	2.6	2.6
	3	20	79	3.5	2.7	3	2.2	2.4	3	3.3	2.2	2.7	2.7	2.77
	3	21	80	3.2	2.6	2.9	2.6	1.6	3.2	3.1	2.6	2.4	2.4	2.66
	3	22	81	3.3	1.8	3.7	2.3	2.7	2.4	3.8	2.3	2.8	2.8	2.79
	3	23	82	3.6	2.3	3.9	2.4	2.7	2.3	3.5	2.4	2.9	2.9	2.89
	3	24	83	3.4	2.6	4.5	2.7	2.8	3.2	3.6	2.7	2.9	2.9	3.13
	3	25	84	3.8	2.7	4.1	3.1	2.7	3.1	3.8	3.1	3	3	3.24
	3	26	85	2	2.7	3.7	3.2	1.9	2.5	3.5	3.2	2.3	2.3	2.73
	3	27	86	5.5	2.6	3.6	3.6	2.2	2.8	3.2	3.6	2.1	2.1	3.13
	3	28	87	5.5	2.7	3.5	3	2.3	2.8	3.2	3	2.4	2.4	3.08
	3	29	88	4.4	2.1	3.2	3.3	2.1	2.5	2.6	3.3	1.3	1.3	2.61
	3	30	89	4.9	3.1	3.3	3.5	2.3	2.7	2.4	3.5	1.7	1.7	2.91
	3	31	90	4.2	2.6	3.3	3.5	2.2	2.8	2.7	3.5	2.7	2.7	3.02
	4	1	91	3.8	2.8	3.7	3.6	2.1	3.1	3.1	3.6	3.2	3.2	3.22
	4	2	92	3.2	3.3	3.7	3.1	1.8	3	3.5	3.1	3.4	3.4	3.15
	4	3	93	2.8	3	4.3	2.5	2.7	4.2	3.6	2.5	3.8	3.8	3.32
	4	4	94	4.5	3.7	4.2	1.8	2.8	3.5	3.6	1.8	3.5	3.5	3.29
	4	5	95	3.9	3.5	3.7	1.7	2.1	3.1	3.6	1.7	3.5	3.5	3.03
	4	6	96	4.1	3.6	3.5	2.6	3.2	4	3.7	2.6	3.8	3.8	3.49
	4	7	97	4.4	2.9	4.3	2.9	3.7	3.8	4.4	2.9	3.9	3.9	3.71
	4	8	98	3.8	3.1	3.5	2	3.5	4.3	4.1	2	4	4	3.43
	4	9	99	3.9	2.2	3.2	2	2.7	3.4	3.4	2	3.9	3.9	3.06
	4	10	100	3.9	3.5	3.4	1	3.3	2.1	2.6	1	3.3	3.3	2.74
	4	11	101	3.5	2.9	2.1	1.7	3.2	2.8	3.7	1.7	3.6	3.6	2.88
	4	12	102	3.6	2.5	3.4	1.3	3.4	3.5	3.8	1.3	1.5	1.5	2.58
	4	13	103	3.7	1.6	3.2	2.8	2.6	4	2.2	2.8	3.1	3.1	2.91
	4	14	104	4.4	2.4	3.7	3.3	3.2	4.2	3.9	5.1	3.5	3.5	3.72
	4	15	105	4.3	3.4	3.7	3.9	2.3	3.5	3.2	4.4	3.5	3.5	3.57
	4	16	106	3.7	3.4	3.7	3.9	2.9	2.7	3.1	4.9	4.5	4.5	3.73
	4	17	107	4.4	2.9	4.4	3.9	3.3	3.2	2.9	5.4	4.3	4.3	3.9
	4	18	108	4	1.1	3.5	4	3	3.5	4.2	5.1	4.3	4.3	3.7
	4	19	109	5.3	3.6	3.8	3.9	3.6	3	4.1	5.3	3.9	3.9	4.04
	4	20	110	4.6	4	3.8	3.3	2.8	3	1.3	5	4.7	4.7	3.72
	4	21	111	5.5	3.8	3.2	3.8	3.3	2.9	3.9	4.2	4.2	4.2	3.9
	4	22	112	5.3	4	3.6	1.4	3.8	2.5	4.2	3.9	3.8	3.8	3.63
	4	23	113	5.3	2.3	3.2	2.1	3.8	3.6	4.5	3.8	4.4	4.4	3.74
	4	24	114	5.3	4.3	2.7	4.1	2.9	4.1	4.3	3.6	4.9	4.9	4.11
	4	25	115	5.8	4	4.2	2.5	3.2	4.1	4.2	3	4.6	4.5	4.01
	4	26	116	4.3	4.4	4	3	4.6	4.9	5	4.9	3.9	3.9	4.29
	4	27	117	4.7	4.4	3.2	4	4.2	4.9	4.6	4.7	4.6	4.6	4.39
	4	28	118	4.7	4.3	2.9	3.3	4.2	5.4	4.1	4.5	4.3	4.3	4.2
	4	29	119	5.6	4.6	3.1	2.8	3.6	5.3	4.4	5.3	4.3	4.3	4.33
	4	30	120	5.9	3.6	3	3.9	4	5.5	4.5	2.9	4.6	4.6	4.25
	5	1	121	5.7	4.1	2.5	2.7	3.9	4.8	4.1	5.3	4.8	4.8	4.27
	5	2	122	4.7	2.6	2.8	2.5	3.6	5.4	2.6	5.7	4.3	4.3	3.85
	5	3	123	4.9	5.4	3.2	3.6	4.6	5.2	5.4	5.3	5.7	5.7	4.9
	5	4	124	5.7	4.6	3.2	4.2	5	4.7	4.6	4.5	4.7	4.7	4.59
	5	5	125	5.5	4.4	4.4	4.2	5	5.6	4.4	3.3	3.5	3.5	4.38
	5	6	126	5	4.2	2.8	3.5	4.1	3.9	4.2	4.3	4.6	4.6	4.12
	5	7	127	5.1	3	2.6	3.8	3.5	3.4	3	5.1	4.2	4.2	3.79
	5	8	128	6.7	4.6	3	4	3.9	4.5	4.6	6.4	3.6	3.6	4.49
	5	9	129	5.5	4.8	3	4.7	4.1	5.1	4.8	5.6	4.8	4.8	4.72
	5	10	130	5	3.3	3.6	4	4.8	4.4	3.3	4.3	3.9	3.9	4.05
	5	11	131	5	4.4	3.1	4.5	4.3	2.8	4.4	5.4	4.1	4.3	4.23
	5	12	132	5.2	5.1	3.4	4	5	3.7	5.1	5.9	4.4	4.4	4.62
	5	13	133	5.7	5.1	3.8	4	5.3	3.4	5.1	5.6	3.7	3.7	4.54
	5	14	134	5.9	5	3.4	4	4.7	4.2	5	5.5	5.1	5.1	4.79
	5	15	135	5.5	5.3	2	4.1	4	4.3	5.3	5.3	5.4	5.4	4.66
	5	16	136	5.5	5.9	3.4	4.6	4.2	3.6	5.9	4.2	5	5	4.73
	5	17	137	5.6	5.9	3.1	4.7	4	4.6	5.9	5.7	4.6	4.6	4.87
	5	18	138	5.8	5.6	4.1	4.6	5.1	4.6	5.6	5.8	3.6	3.6	4.84
	5	19	139	5.9	3.8	3.3	4.5	5	5.2	3.8	6.3	4.9	4.9	4.76
	5	20	140	6.7	5.4	3	3.7	5.3	2.9	5.4	6.5	5.1	5.1	4.91
	5	21	141	7.7	4.3	2.5	4.7	5.1	2.5	4.3	5.1	5.2	5.2	4.66
	5	22	142	6.5	5.4	3.5	5	4.4	5.4	5.4	5.4	5	5	5.1
	5	23	143	6.4	3.3	2.1	5.3	4	5.8	3.3	5.6	5.7	5.7	4.72
	5	24	144	6	5	3.6	5.1	4.9	6.1	5	6.3	5.4	5.4	5.28
	5	25	145	5.1	6.1	3.6	5.1	4.7	4.6	6.1	6.4	5.7	5.7	5.31
	5	26	146	5.5	4	2.5	5.3	3.8	5.7	4	6.8	5.4	5.4	4.84
	5	27	147	5.2	5.2	3.7	5.3	4.3	5.7	5.2	6.5	3.8	3.8	4.87
	5	28	148	5.7	5.2	4.4	4.4	4.9	5	5.2	6.3	3.1	3.1	4.73
	5	29	149	6.5	5.7	4.6	4	6	6	5.7	5.9	3.7	3.7	5.18
	5	30	150	7.1	5.6	3.2	5.3	5.2	5.3	5.6	6.3	4.4	4.4	5.24
	5	31	151	7.3	6.2	3.5	5.8	5.4	5	6.2	6.3	5.4	5.4	5.65
	6	1	152	5.7	5.1	3.7	4.2	4.3	5.8	6.1	6.3	5.6	5.6	5.24
	6	2	153	5.9	6.1	4.1	5.2	4.8	5.6	5.8	6.7	5.7	5.7	5.56
	6	3	154	4.9	6.1	3	5.5	4.4	6	5	6.8	5.4	5.4	5.25
	6	4	155	5.2	5.2	4.3	5.6	4.9	5.9	5.5	6.7	5.2	5.2	5.37
	6	5	156	6.2	5.6	5	5.4	5.4	6.1	3.4	7.4	5.9	5.9	5.63
	6	6	157	6.3	6.4	6.9	5.6	6.6	6.2	6.5	6.9	6.3	6.3	6.4
	6	7	158	5.3	5.7	4.3	6.5	5.5	5.3	4.4	5.9	5.6	5.6	5.41
	6	8	159	5.4	5.6	1.7	6.7	4.6	5.4	5.5	6.3	5	5	5.12
	6	9	160	5.8	5.9	1.9	6.5	4.7	5.1	5.6	7	5	5	5.25
	6	10	161	5.7	6.4	4.6	6.6	5.3	5.8	5.5	5.7	6	6	5.76
	6	11	162	6	7.2	5	6	5.9	6.5	6.3	5.6	6.6	6.6	6.17
	6	12	163	5.7	7.9	5.6	6.1	6.9	7.2	6.1	5.8	6.9	6.9	6.51
	6	13	164	5.8	7	6	5.5	6.6	6.7	6.5	6.3	6.3	6.3	6.3
	6	14	165	5.7	6	5.8	5.1	5.9	6.5	6.4	6.5	6.3	6.3	6.05
	6	15	166	5.8	6.1	3	5.5	5.6	6.3	5.7	6.3	6.3	6.3	5.69
	6	16	167	6	6.8	3.7	6.2	5.9	6.6	6	6.6	6.1	6.1	6
	6	17	168	5.4	6.4	4.6	6.8	5.9	6.7	6.3	6.7	6	6	6.08
	6	18	169	5.8	5.8	7	7.1	6.5	6.2	7.6	6.2	5.4	5.4	6.3
	6	19	170	5.6	6.5	7.3	7	6.6	5.6	8.1	7.7	5.9	5.9	6.62
	6	20	171	5.7	7.1	5.6	7.2	5.9	6.8	7.4	7.2	6.5	6.5	6.59
	6	21	172	5.6	6.9	7.1	6.9	5.9	6.7	6.6	6.7	6.9	6.9	6.62
	6	22	173	5.8	8.2	6.5	7	5.5	7.4	5.9	7.4	8	8	6.97
	6	23	174	6.9	7.2	5.8	5.8	5.2	7.2	6	7.2	6.8	6.8	6.49
	6	24	175	7.9	5.8	5.1	5.6	5.4	5.9	6.4	5.9	5.7	5.7	5.94
	6	25	176	6.1	6.8	5.4	6.6	5	6.8	5.5	7.2	6.2	6.2	6.18
	6	26	177	6.4	7.9	6	7.2	5.3	8.3	3.3	6.9	8.2	8.2	6.77
	6	27	178	5.2	7.1	5.5	6.8	5.5	7.1	3.9	6.6	6.4	6.4	6.05
	6	28	179	6.5	6.3	6.5	6	6.5	6.8	6.5	6.4	6.5	6.5	6.45
	6	29	180	6.2	6.2	7.1	6.7	6.9	6.4	7.8	6.2	6.1	6.1	6.57
	6	30	181	5.1	7	6.4	6.1	5.3	7.5	6.6	6.5	7	7	6.45
	7	1	182	5.5	7.2	5	7	5.5	7.1	7.2	6.7	7.1	7.1	6.54
	7	2	183	5.8	7.3	6.7	7.1	4.9	6.9	7	6.7	7.2	7.2	6.68
	7	3	184	5.6	7.7	6.3	7.3	4.1	8	6.1	6.9	8.2	8.2	6.84
	7	4	185	6.1	7.8	6.8	7.3	5.7	8.1	6.7	6.8	8.3	8.3	7.19
	7	5	186	6.5	7.1	7.4	6.4	5.8	7.7	6.9	7.4	7.7	7.7	7.06
	7	6	187	6.4	7.8	6.5	6.3	5	7.9	6.3	6.5	7.8	7.8	6.83
	7	7	188	6.1	6.5	5.7	7.6	4.6	7.5	5.5	5.7	5.9	5.9	6.1
	7	8	189	5.7	6.2	4.9	8.3	5.5	6.4	5.7	6.5	5.6	5.6	6.04
	7	9	190	5.4	7.3	6.8	7.1	5.8	7.4	6.6	6.8	6.8	6.8	6.68
	7	10	191	5.9	8.5	6.7	6.2	5.6	6.3	6.6	7.4	8	8	6.92
	7	11	192	5.5	7.9	6.7	6.8	5.2	7.7	6.4	6.5	7.7	7.7	6.81
	7	12	193	5.2	7.4	6.2	7.1	5.5	7.2	6.3	5.7	6.9	6.9	6.44
	7	13	194	5.5	7	6	6.8	5.4	7.3	6.2	5.9	6.9	6.9	6.39
	7	14	195	5.9	6.2	6.5	7.4	6.1	7	6.5	6	6.8	6.8	6.52
	7	15	196	5.7	6.2	7	7.7	6.3	7.4	6.8	5.4	7.3	7.3	6.71
	7	16	197	5.5	5.7	6.8	8.1	5.9	6.8	6.4	5.7	6.3	6.3	6.35
	7	17	198	5.7	6.1	5.8	7.1	5.1	6.6	6	6	6.4	6.4	6.12
	7	18	199	5	6.2	5.7	6	5.2	6.3	5.9	6.3	6.6	6.6	5.98
	7	19	200	5.4	6.6	6.1	5.6	5.4	6.4	6	6.6	6.6	6.6	6.13
	7	20	201	5.4	7	6.1	5.5	5.5	6.7	5.7	7	6.6	6.6	6.21
	7	21	202	5.4	7	5.7	5.6	5.2	7.1	4.9	6.4	6.8	6.8	6.09
	7	22	203	5.2	6.7	6	5.4	5.5	6.8	5.8	6.7	6.7	6.7	6.15
	7	23	204	5.5	6.6	7.9	6.6	7.5	6.5	7.6	5.9	6.4	6.4	6.69
	7	24	205	4.4	6.9	7.8	3.4	7.3	7	8.6	5.5	6.9	6.9	6.47
	7	25	206	5.3	6.4	6.7	5.8	6.4	6.7	7.2	6	6.7	6.7	6.39
	7	26	207	5.7	6.2	7.5	6.1	7.2	5.5	7.3	5.9	6	6	6.34
	7	27	208	5.2	7	6.8	6	5.9	6.9	6.2	5.3	7	7	6.33
	7	28	209	4.3	5.8	7.2	6.5	6.4	6	6.9	5.6	6.1	6.1	6.09
	7	29	210	4.7	5.5	7.4	5.6	6.7	4.4	7.7	5.9	5.9	5.9	5.97
	7	30	211	4.1	6.1	7	5.5	6.2	4.6	6.8	5.9	6.2	6.2	5.86
	7	31	212	4.5	5.9	6.5	5.3	5.9	5.8	6.6	6.4	6	6	5.89
	8	1	213	4.3	6.7	5.8	5.3	5	4.3	6	6.1	6.9	6.9	5.73
	8	2	214	4.6	6.3	6.4	6.1	5.5	6.1	6.3	5.8	6.9	6.9	6.09
	8	3	215	4.3	5.7	6.7	7.2	5.8	6.2	6.7	5.3	6.1	6.1	6.01
	8	4	216	4.3	5.5	6.6	6.8	5.6	5.9	6.1	5.4	5.7	5.7	5.76
	8	5	217	4.4	5.5	6.9	6.2	6	5.5	5.9	5.5	5.4	5.4	5.67
	8	6	218	4.8	6.1	7.5	6.2	6.4	3.7	6.8	5	5.9	5.9	5.83
	8	7	219	4.4	7	7.3	6.9	6.3	5.7	7.2	5.2	7.2	7.2	6.44
	8	8	220	4.1	6.7	6.9	5.8	6	5.3	7	5.4	6.8	6.8	6.08
	8	9	221	3.9	6.5	6.5	6.1	5.5	6.2	6.5	5.5	6.4	6.4	5.95
	8	10	222	3.7	6	6	4.4	5.4	6	6.1	5.4	6.2	6.2	5.54
	8	11	223	3.3	6.3	6.7	5.6	5.7	6.6	6.7	5.7	7	7	6.06
	8	12	224	3.9	5.3	6.6	5.2	5.6	5.5	6.1	4.9	5.6	5.6	5.43
	8	13	225	3.8	4.8	6.1	5.2	5.5	5	5.9	5.5	4.9	4.9	5.16
	8	14	226	3.4	5.4	6.7	5.3	5.8	5.5	6.9	5.8	5.8	5.8	5.64
	8	15	227	3.4	4.9	6.9	5	6.3	5.5	6.8	5.8	5.3	5.3	5.52
	8	16	228	3.6	4.9	6.3	5.1	5.4	5.2	6.6	4.5	5	5	5.16
	8	17	229	3.2	5.5	6.5	6.1	5.6	5.5	6.5	2.9	5.4	5.4	5.26
	8	18	230	2.6	5.8	6.6	6.3	4.9	5.3	6.3	3.8	5.3	5.3	5.22
	8	19	231	2.7	5.7	5.9	5.9	4.2	5.5	5	4.9	5.2	5.2	5.02
	8	20	232	2.4	6	5.9	4.7	4.1	5.9	5.6	4.6	6.1	6.1	5.14
	8	21	233	3.1	6.2	5.1	4.9	3.8	5.9	5.6	4.6	6.4	6.4	5.2
	8	22	234	2.4	5.9	5.8	5	4.8	6	5.6	5.6	6.4	6.4	5.39
	8	23	235	2.9	4.9	5.4	5.8	4.6	5.2	5.5	5.3	4.7	4.7	4.9
	8	24	236	3.1	5.4	6	5.7	5.2	5.8	5.5	4.4	5.6	5.6	5.23
	8	25	237	2.6	5.1	5.4	5	4.2	5.7	5.4	3.8	5.2	5.2	4.76
	8	26	238	2.5	4.8	4.6	4.8	5.5	5.2	5.6	3.9	4.9	4.9	4.67
	8	27	239	2	4.5	5.3	4.9	5.9	5.4	6	4.3	4.3	4.3	4.69
	8	28	240	2.5	5.4	5.4	4.7	5.4	5.6	5.9	4.3	5.3	5.3	4.98
	8	29	241	1.7	6	4.9	4.4	4.9	6.2	5.4	4.6	6.3	6.3	5.07
	8	30	242	1.7	5.7	4.8	4.7	4.8	5.8	5.1	4.7	5.9	5.9	4.91
	8	31	243	2	5.4	4.7	4.5	4.4	5.7	4.9	4.3	5.4	5.4	4.67
	9	1	244	2.2	4.4	5	4.6	4.7	4.7	5.5	4.3	4.5	4.5	4.44
	9	2	245	2	5.2	4.3	4.4	4.5	5.4	5.2	4.3	5.4	5.4	4.61
	9	3	246	2	5.2	4.9	4.5	4.5	5.3	4.8	4.6	5.4	5.4	4.66
	9	4	247	2.5	5.5	5	4.4	4.7	5.2	5.2	4.1	5.3	5.3	4.72
	9	5	248	2	5.6	4.8	4.7	4.7	5	5.1	3.7	5.3	5.3	4.62
	9	6	249	1.6	4.2	4.7	4.5	4.6	4.5	4.9	3.9	4.3	4.3	4.15
	9	7	250	1.8	4.1	4.5	5.1	4.9	4.2	5	3.7	3.8	3.8	4.09
	9	8	251	2.2	4.4	4.2	5.4	4.6	4.5	4.6	3.2	4.5	4.5	4.21
	9	9	252	2.2	4.4	4.6	5.1	4.4	4.3	4.7	3	4.3	4.3	4.13
	9	10	253	2.5	4.1	4.2	4.4	3.9	4.3	4.4	2.7	4.6	4.6	3.97
	9	11	254	3.1	5.3	3.6	4.2	3.9	5.2	4.2	3.1	5.8	5.8	4.42
	9	12	255	2.7	3.8	2.9	3.8	3.9	4.8	4.1	3.6	4.8	4.8	3.92
	9	13	256	2.2	4.3	4.2	3.9	4.4	4.9	4.8	3	4.8	4.8	4.13
	9	14	257	1.9	3.7	3.6	4.6	4.2	4.6	4.1	2.1	4	4	3.68
	9	15	258	1.4	3.7	3.2	3.4	3.9	4.1	4.1	2	3.7	3.7	3.32
	9	16	259	2	3.6	3.5	3.9	3.8	4.1	3.9	2.1	3.8	3.8	3.45
	9	17	260	2.3	3.5	3.9	4.9	4.4	3.9	4.3	2.5	3.6	3.6	3.69
	9	18	261	1.6	3.3	3.3	3.7	4.5	3.3	4	2.5	3.7	3.7	3.36
	9	19	262	1.6	3.7	3.9	3.7	4.3	3.6	4.7	2.8	4.2	4.2	3.67
	9	20	263	1.7	3.5	2.5	3.5	3.4	4.2	3.3	3	4.6	4.6	3.43
	9	21	264	1.6	3.4	2.9	3.4	3	4	3.6	2.5	4.4	4.4	3.32
	9	22	265	1.6	3.6	2.8	3.8	3	4.1	3.4	2.4	4	4	3.27
	9	23	266	1.5	3.8	3	2.9	3.2	3.6	3.7	2.8	3.8	3.8	3.21
	9	24	267	1.6	3.9	2.9	3.8	3.3	4	3.2	3.2	4	4	3.39
	9	25	268	1.8	3.6	2.5	3.5	2	3.7	3.1	3.4	3.6	3.6	3.08
	9	26	269	1.4	3.8	2.5	2.7	3.4	3.8	3.4	2.8	3.8	3.8	3.14
	9	27	270	1.5	3.4	2.4	2.7	3.6	3.6	3.6	2.8	3.4	3.4	3.04
	9	28	271	1.4	3	3	3.2	3.5	3.6	2.3	3.6	3.9	3.9	3.14
	9	29	272	1.6	3	1.6	3.1	2.7	3.7	2.9	2.2	3.7	3.7	2.82
	9	30	273	1.5	3	2.8	2.5	3.4	3.7	3.3	1.5	3.5	3.5	2.87
	10	1	274	1.5	2.9	2.7	2.6	3.7	2.7	3.3	1.4	2.9	2.9	2.66
	10	2	275	1.5	2.8	2.6	2.7	3.5	2.5	3.1	1.4	2.9	2.9	2.59
	10	3	276	1.4	3.3	2.5	2.6	3.3	3	3.3	1.8	3.4	3.4	2.8
	10	4	277	1.2	3.2	1.9	2.7	3.2	3	2.8	1.4	3.4	3.4	2.62
	10	5	278	1.5	3.1	1.5	2.9	2.9	2.3	3	1.6	3	3	2.48
	10	6	279	1.5	2.7	2.4	3	3	2	3.2	1.5	2.9	2.8	2.5
	10	7	280	1.1	2.6	1.8	2.7	2.8	1.9	3.3	1.8	3	3	2.4
	10	8	281	1.1	2.7	2.7	2.4	3	2	3.2	1.5	3.1	3.1	2.48
	10	9	282	1.1	2.4	2.2	2.5	2.6	2.6	2.8	1.6	2.9	2.9	2.36
	10	10	283	1	2.4	1.6	3.2	2.2	2.9	2.4	1.6	2.9	2.9	2.31
	10	11	284	1.3	2.6	1.7	2.5	2.1	2.8	1.9	1.5	2.9	2.9	2.22
	10	12	285	1.1	2.9	2.2	2.5	2.4	3	2.2	2.3	2.8	2.8	2.42
	10	13	286	1	1.5	1.7	2.5	2.2	2.8	2.3	1.8	2.7	2.7	2.12
	10	14	287	1.1	1.3	1.8	2.3	2.1	2.6	1.5	1.9	2.8	2.8	2.02
	10	15	288	1.1	2.8	2.5	1.5	2.7	2.9	2.7	2.1	3	3	2.43
	10	16	289	1	3.4	2.3	2.7	2.5	3	2.1	1.8	3	3	2.48
	10	17	290	1	2.9	1.9	2.1	2.1	2.9	2	1.7	3.4	3.4	2.34
	10	18	291	1.2	2.8	1.8	2	2.3	2.1	1.9	1.5	2.9	2.9	2.14
	10	19	292	1.1	3	2.2	1.9	1.9	2.2	1.2	1.2	2.7	2.7	2.01
	10	20	293	0.8	4.2	2.9	2.1	1.8	2.6	1.4	1.3	3.7	3.7	2.45
	10	21	294	0.9	2.3	3.5	1.9	2.3	2.1	2.2	1.3	2.4	2.4	2.13
	10	22	295	1	2.2	2.7	1.9	1.8	2.3	2.1	1.4	2.3	2.3	2
	10	23	296	1.5	2.3	1	1.9	1.9	2.4	1.6	1.3	2.3	2.3	1.85
	10	24	297	0.9	2	1	1.8	1.4	2	1.8	1.2	2.1	2.1	1.63
	10	25	298	1.2	1.9	2.9	1.6	1.2	1.5	1.9	0.9	2	2	1.71
	10	26	299	1.1	2.2	2.7	1.9	1.5	1.7	1.7	1.1	1.9	1.9	1.77
	10	27	300	1.2	1.8	2.1	2.1	1.1	1.6	2	1.4	1.9	1.9	1.71
	10	28	301	1.3	1.5	2.3	1.3	1.3	1.8	1.6	1.4	2	2	1.65
	10	29	302	0.8	1.9	2.4	1.4	1.4	2.1	2.1	1.5	1.7	1.7	1.7
	10	30	303	0.9	1.8	1.9	1.5	2.1	2.3	2.5	1.5	2.2	2.2	1.89
	10	31	304	1	1.4	1.3	1.4	1.2	2	1.1	1.3	1.8	1.8	1.43
	11	1	305	1.1	1.1	1.6	1.7	1.4	1.8	1.3	1.2	1.3	1.3	1.38
	11	2	306	0.8	1.4	2.1	1.6	1.6	1.8	1.4	1.1	0.8	0.8	1.34
	11	3	307	0.8	1.4	2.1	1	1.5	1.6	1.4	0.8	1.4	1.4	1.34
	11	4	308	0.7	1.6	1.8	0.9	1.2	2.3	1.4	0.8	1.7	1.7	1.41
	11	5	309	1	1.6	2.5	1.1	1.5	1.8	1.3	1	1.8	1.8	1.54
	11	6	310	0.9	1.2	2.7	1.3	1.4	1.9	1.5	0.9	1.8	1.8	1.54
	11	7	311	1.3	1.8	2.4	1.4	1.7	1.9	1.7	0.9	1.9	1.9	1.69
	11	8	312	1.4	1.6	1.8	1.3	1.5	1.3	1.7	0.9	1.8	1.8	1.51
	11	9	313	0.9	1.5	2.1	1.6	1.6	0.9	1.6	0.8	1.6	1.6	1.42
	11	10	314	0.8	1.4	2.8	1.2	2.2	1.1	1.7	0.7	1.5	1.4	1.48
	11	11	315	0.8	1.6	2.3	1.3	2	1.2	1.8	0.7	1.6	1.6	1.49
	11	12	316	0.8	1.6	2.1	1.1	1.6	1.4	1.7	0.6	1.6	1.6	1.41
	11	13	317	0.9	1.5	2.4	1	1.4	1.4	1.5	0.8	1.5	1.5	1.39
	11	14	318	0.8	1.3	2.4	0.8	1	1.5	1.2	0.7	1.5	1.5	1.27
	11	15	319	0.8	1.3	1.5	0.9	1.2	1.5	1	0.8	1.5	1.5	1.2
	11	16	320	0.7	1.3	1.6	1	1.1	1.5	1.1	0.8	1.5	1.5	1.21
	11	17	321	0.9	1	1.6	1	1.1	1.1	0.8	0.8	1.1	1.1	1.05
	11	18	322	1	1.1	1.7	0.7	1.3	1.3	1.2	0.9	1.2	1.2	1.16
	11	19	323	1.1	0.9	1.7	0.7	1.2	1.4	1.1	1.1	1.2	1.2	1.16
	11	20	324	0.8	1	1.1	1	1	1.5	0.9	1.1	1.2	1.2	1.08
	11	21	325	0.8	1	1.1	1	1.3	1.5	0.9	0.9	1.3	1.3	1.11
	11	22	326	0.9	1	1.3	1	1.3	1.2	0.8	1.1	1.2	1.2	1.1
	11	23	327	0.9	1.1	1.5	0.9	1.1	1.1	0.8	1.1	1.1	1.1	1.07
	11	24	328	1	0.9	1.7	0.8	1.3	0.9	0.8	1	1	1	1.04
	11	25	329	1.5	0.9	1.7	0.8	1.3	0.9	0.5	1.1	1	1	1.07
	11	26	330	1.4	0.8	1.7	0.8	0.9	0.9	0.7	0.9	1	1	1.01
	11	27	331	1	0.8	1.9	0.8	0.8	0.7	0.8	0.8	0.9	0.9	0.94
	11	28	332	1	0.8	1.7	0.8	1.1	0.8	1	0.8	0.9	0.9	0.98
	11	29	333	1.1	0.5	1.8	0.8	1.1	0.6	0.8	0.8	0.9	0.9	0.93
	11	30	334	1.1	1	1.4	0.8	1	0.8	0.7	1.1	0.9	0.9	0.97
	12	1	335	0.9	0.9	0.9	0.8	0.9	0.8	0.6	1.3	0.6	0.6	0.83
	12	2	336	0.9	0.9	1.3	1	1.2	0.7	0.8	0.9	0.7	0.7	0.91
	12	3	337	1.1	0.9	1.4	1	1.6	0.8	1.2	0.8	0.8	0.8	1.04
	12	4	338	1.2	0.7	0.8	0.9	1	0.7	0.8	0.6	0.7	0.7	0.81
	12	5	339	0.8	0.9	1.1	0.7	1	0.5	0.7	0.5	0.6	0.6	0.74
	12	6	340	0.8	0.9	1.1	1	1.1	0.8	0.9	0.9	0.8	0.8	0.91
	12	7	341	0.9	0.8	1	0.9	0.9	0.6	0.7	0.8	0.7	0.7	0.8
	12	8	342	0.8	0.7	1	0.7	0.9	0.5	0.8	0.8	0.7	0.7	0.76
	12	9	343	0.9	0.6	1.3	0.5	1	0.5	1	0.8	0.6	0.6	0.78
	12	10	344	1	0.6	1.1	0.5	1.1	0.5	0.5	0.8	0.6	0.6	0.73
	12	11	345	0.8	0.6	0.9	0.6	0.9	0.4	0.8	0.8	0.7	0.7	0.72
	12	12	346	0.7	0.7	0.9	0.7	1.2	0.4	0.9	0.8	0.7	0.7	0.77
	12	13	347	0.8	0.7	0.9	0.8	0.9	0.6	0.8	0.8	0.7	0.7	0.77
	12	14	348	0.9	0.9	0.8	0.9	0.8	0.7	0.7	0.8	0.7	0.7	0.79
	12	15	349	0.9	0.9	0.9	0.7	0.8	0.6	0.9	1	0.8	0.8	0.83
	12	16	350	0.6	0.8	1	0.7	0.9	0.6	1	1	0.7	0.7	0.8
	12	17	351	0.7	1	0.8	0.8	0.7	0.7	0.9	0.9	0.7	0.7	0.79
	12	18	352	1	1	0.9	1	0.8	0.6	0.9	0.7	0.8	0.8	0.85
	12	19	353	1.1	0.9	0.8	1	0.9	0.6	0.9	1	0.6	0.6	0.84
	12	20	354	1.1	1	1.2	0.9	1.2	0.6	1.1	0.9	0.6	0.6	0.92
	12	21	355	0.6	0.9	1.2	0.8	1.2	0.7	1	0.7	0.6	0.6	0.83
	12	22	356	0.7	0.9	0.6	0.9	0.9	0.7	0.8	0.5	0.6	0.6	0.72
	12	23	357	0.8	1	0.7	0.7	0.8	0.8	0.6	0.5	0.8	0.8	0.75
	12	24	358	0.6	0.7	0.6	0.5	0.8	0.8	0.7	1.2	0.7	0.7	0.73
	12	25	359	0.7	1.1	0.6	0.6	0.9	0.8	0.8	1.2	0.9	0.9	0.85
	12	26	360	0.7	1.1	0.9	0.6	0.9	0.6	0.9	0.9	1	1	0.86
	12	27	361	0.7	0.8	1.1	0.6	0.8	0.7	0.8	0.8	0.7	0.7	0.77
	12	28	362	0.6	0.8	1.3	0.7	0.8	0.8	0.8	0.8	0.7	0.7	0.8
	12	29	363	0.8	0.8	1.1	0.9	0.8	0.8	0.8	0.9	0.7	0.7	0.83
	12	30	364	0.8	0.7	1.1	0.7	0.9	0.6	1.1	0.9	0.6	0.6	0.8
	12	31	365	0.8	0.6	0.9	0.5	0.8	0.6	0.8	0.8	0.7	0.7	0.72

## Sheet: Sayfa1
																	Monthly Average
						ETo-PM													ETo-PM
	month	day	DOY	2008	2009	2010	2011	2012	2013	2014	2015	2016	2017	AVE.			2008	2009	2010	2011	2012	2013	2014	2015	2016	2017	AVE.	Std. ERROR
	#	#
	1	1	1	0.7	0.5	0.8	0.7	0.7	0.7	0.8	0.7	0.5	0.5	0.66		Jan	0.922581	0.829032	0.832258	0.83871	0.829032	0.967742	0.906452	1.03226	0.83871	0.83871	0.883548	0.020606	0.20606
	1	2	2	0.5	0.5	0.8	0.8	0.7	0.7	1	0.7	0.5	0.5	0.67		Feb	2.31613	1.48065	2.03548	1.20323	1.1	1.51613	1.56452	1.82903	1.46452	1.46452	1.59742	0.106352	1.06352
	1	3	3	0.6	0.8	0.9	0.7	0.9	0.8	1.3	1	0.7	0.7	0.84		Mar	3.33226	2.17097	3.23871	2.41935	1.7871	2.44839	2.40645	2.57419	2.33548	2.33548	2.50484	0.133755	1.33755
	1	4	4	0.6	0.7	0.9	1.3	1	0.7	1.1	0.8	0.5	0.5	0.81		Apr	4.4	3.28065	3.52258	2.89032	3.16129	3.67419	3.69032	3.5	3.85484	3.85161	3.58258	0.121448	1.21448
	1	5	5	0.7	0.7	0.6	1	0.5	0.6	0.9	0.7	0.6	0.6	0.69		May	5.79355	4.79032	3.25484	4.36129	4.58387	4.62581	4.79032	5.57742	4.60645	4.6129	4.69968	0.197685	1.97685
	1	6	6	0.7	0.8	0.8	0.7	0.8	0.7	0.8	0.7	0.7	0.7	0.74		Jun	5.9	6.46774	5.09677	6.15484	5.61613	6.36774	5.94839	6.57742	6.16774	6.16774	6.04645	0.126269	1.26269
	1	7	7	0.8	0.7	0.9	0.8	0.6	0.6	0.8	0.6	0.5	0.5	0.68		Jul	5.42258	6.76774	6.52258	6.46774	5.75161	6.77419	6.52903	6.25806	6.81935	6.81935	6.41323	0.138021	1.38021
	1	8	8	0.7	0.8	1.3	0.7	0.9	0.6	1	0.8	0.6	0.6	0.8		Aug	3.27742	5.67419	6.07097	5.47742	5.29355	5.57742	6.04839	4.92903	5.79032	5.79032	5.3929	0.236211	2.36211
	1	9	9	0.7	0.7	1.2	0.7	1	0.5	1	0.8	0.7	0.7	0.8		Sep	1.90323	4.04516	3.60968	3.96129	3.92581	4.30968	4.13871	3.0871	4.31935	4.31935	3.76194	0.218234	2.18234
	1	10	10	0.8	0.6	1.8	0.7	1.4	0.5	0.7	0.8	0.7	0.7	0.87		Oct	1.14194	2.47742	2.15161	2.19677	2.24194	2.37419	2.26452	1.51613	2.67419	2.67097	2.17097	0.140798	1.40798
	1	11	11	1	0.7	1.2	0.7	0.9	0.7	1	1	0.8	0.8	0.88		Nov	0.967742	1.20645	1.85161	1.04839	1.31935	1.34194	1.16774	0.912903	1.33871	1.33548	1.24903	0.0765568	0.765568
	1	12	12	0.9	0.7	1	0.8	0.8	0.6	1	1.1	0.9	0.9	0.87		Dec	0.829032	0.832258	0.974194	0.76129	0.948387	0.648387	0.83871	0.841935	0.703226	0.703226	0.808065	0.0304393	0.304393
	1	13	13	1.1	0.7	0.8	0.8	0.7	0.7	0.6	1	0.8	0.8	0.8		Std. Error	0.56748	0.629443	0.536131	0.605176	0.553531	0.618933	0.610806	0.616045	0.621949	0.622137	0.583284
	1	14	14	1	1	0.8	0.7	0.7	0.9	0.7	1.1	0.8	0.8	0.85			Monthly Total		ETo-PM
	1	15	15	0.7	1.2	0.7	0.8	0.7	1.1	0.7	1.1	1.1	1.1	0.92			2008	2009	2010	2011	2012	2013	2014	2015	2016	2017	AVE.	Std. Error
	1	16	16	0.4	1.5	0.7	1	0.8	1	0.8	1	1.3	1.3	0.98
	1	17	17	0.6	1.3	0.9	0.9	0.8	1	0.9	1	1.4	1.4	1.02		Jan	28.6	28.5	30.9	26	25.7	30	28.1	32	26	26	28.18	0.652602
	1	18	18	0.9	1.3	1.2	0.9	0.7	1.1	1	1.3	1.1	1.1	1.06		Feb	71.8	45.9	63.1	37.3	34.1	47	48.5	56.7	45.4	45.4	49.52	3.29691
	1	19	19	0.8	1	1.1	0.8	0.7	0.9	1	1.2	0.8	0.8	0.91		Mar	103.3	67.3	100.4	75	55.4	75.9	74.6	79.8	72.4	72.4	77.65	4.1464
	1	20	20	0.7	1	1	1.1	0.7	0.9	1	1.2	0.7	0.7	0.9		Apr	136.4	101.7	109.2	89.6	98	113.9	114.4	108.5	119.5	119.4	111.06	3.7649
	1	21	21	0.8	1.1	1.1	1.3	0.9	1.4	1	1.3	1	1	1.09		May	179.6	148.5	100.9	135.2	142.1	143.4	148.5	172.9	142.8	143	145.69	6.12824
	1	22	22	0.9	1.4	0.9	1	0.8	2.2	0.9	1.1	1.4	1.4	1.2		Jun	182.9	200.5	158	190.8	174.1	197.4	184.4	203.9	191.2	191.2	187.44	3.91434
	1	23	23	0.8	1.2	1.2	0.9	1.1	1.3	0.9	1.1	1	1	1.05		Jul	168.1	209.8	202.2	200.5	178.3	210	202.4	194	211.4	211.4	198.81	4.27866
	1	24	24	1.3	1.3	1.2	0.9	0.7	2.4	1.1	1.2	1.1	1.1	1.23		Aug	101.6	175.9	188.2	169.8	164.1	172.9	187.5	152.8	179.5	179.5	167.18	7.32255
	1	25	25	1.1	0.7	1	1	0.7	1.2	0.9	1.3	0.6	0.6	0.91		Sep	59	125.4	111.9	122.8	121.7	133.6	128.3	95.7	133.9	133.9	116.62	6.76525
	1	26	26	1.2	1	0.8	0.6	0.8	1	0.7	1.3	0.7	0.7	0.88		Oct	35.4	76.8	66.7	68.1	69.5	73.6	70.2	47	82.9	82.8	67.3	4.36474
	1	27	27	1.1	0.6	1	0.6	1	0.7	0.7	1.4	0.7	0.7	0.85		Nov	30	37.4	57.4	32.5	40.9	41.6	36.2	28.3	41.5	41.4	38.72	2.37326
	1	28	28	1.3	0.8	1	0.7	0.9	1	0.8	0.9	0.7	0.7	0.88		Dec	25.7	25.8	30.2	23.6	29.4	20.1	26	26.1	21.8	21.8	25.05	0.943619
	1	29	29	1.6	1.2	0.9	0.9	1	1.3	0.8	1.4	0.9	0.9	1.09		Std.Error	17.5919	19.4295	16.4494	18.7604	17.1594	19.1869	18.935	19.0974	19.2804	19.2862	18.0575
	1	30	30	1.7	1.1	1.1	0.7	1	1.3	0.9	1.3	1.2	1.2	1.15		Total	1122.4	1243.5	1219.1	1171.2	1133.3	1259.4	1249.1	1197.7	1268.3	1268.2	1213.22
	1	31	31	1.9	0.9	1.3	0.8	0.8	0.9	1.3	1.1	1	1	1.1
	2	1	32	2	0.9	1.8	0.9	0.9	1.2	1.1	0.9	1	1	1.17		Average	0.922581	0.829032	0.832258	0.83871	0.829032	0.967742	0.906452	1.03226	0.83871	0.83871
	2	2	33	1.7	1	1.6	1	0.6	1.1	1	1.5	0.6	0.6	1.07		Total	28.6	28.5	30.9	26	25.7	30	28.1	32	26	26
	2	3	34	1.6	1.4	1.4	1.4	0.8	1.3	1.1	0.7	1.4	1.4	1.25		Std. Dv.	0.349962	0.278591	0.237324	0.176404	0.173577	0.436186	0.167203	0.231498	0.261633	0.261633
	2	4	35	1.8	1.7	1.6	0.9	1	1.5	1	1.1	1.8	1.8	1.42		Std. Error	0.062855	0.0500364	0.0426246	0.031683	0.0311754	0.0783413	0.0300306	0.0415783	0.0469906	0.0469906
	2	5	36	1.9	0.9	1.4	1.1	0.9	1.3	1.1	1	1.3	1.3	1.22
	2	6	37	1.6	1.4	1.6	1.4	1.1	1.1	1.3	1.7	0.9	0.9	1.3
	2	7	38	1.9	1.5	1.7	1.2	1.1	0.9	1.3	1.8	0.8	0.8	1.3
	2	8	39	2.2	1.7	1.7	1.4	0.8	1.7	1.4	1.3	1.2	1.2	1.46
	2	9	40	1.6	1.7	1.6	1.5	0.8	2.2	1.5	0.9	1.9	1.9	1.56
	2	10	41	2.2	1.5	1.6	1.3	0.8	1.2	1.6	1.9	1.3	1.3	1.47
	2	11	42	2.9	1.6	1.9	1.2	1	1.3	1.7	2.1	1.4	1.4	1.65
	2	12	43	2.9	1.2	2.1	1.2	0.8	1.3	1.6	1.8	1.3	1.3	1.55
	2	13	44	2.9	1.3	2.3	1	0.8	1.6	1.5	2.6	1.6	1.6	1.72
	2	14	45	2.4	1.7	1.6	0.9	1.2	1.5	1.4	1.7	1.4	1.4	1.52
	2	15	46	2.1	1.6	2.6	1.1	1.4	1.5	1.3	1.3	1.8	1.8	1.65
	2	16	47	2	1.7	2.6	1	1.2	1.4	1.1	1.7	1.8	1.8	1.63
	2	17	48	2	1.5	2.4	0.9	1	1.2	1.6	2.1	2	2	1.67
	2	18	49	1.9	1.6	2.7	1.6	0.7	1.3	1.9	2.1	2.2	2.2	1.82
	2	19	50	1.4	1.7	2.6	1.2	1	1.9	1.8	2.7	1.9	1.9	1.81
	2	20	51	2.8	1.8	2.9	1.5	0.8	1.8	2	2.4	2	2	2
	2	21	52	2.4	1.4	1.9	1.2	0.9	1.8	2	3.6	1.2	1.2	1.76
	2	22	53	2.8	1.4	2.9	1.6	1.7	1.6	2.4	2.9	1	1	1.93
	2	23	54	3.2	1.6	2.5	1.3	1.6	1.2	2.2	2.5	0.9	0.9	1.79
	2	24	55	4	1.7	2.6	1.7	1.8	1.8	2.5	1.4	1.6	1.6	2.07
	2	25	56	3.3	1.8	2.4	1.4	1.5	2	1.9	2.2	1.3	1.3	1.91
	2	26	57	3.6	1.8	2.9	1.4	1.9	2.2	2.6	2.4	2.1	2.1	2.3
	2	27	58	2.8	1.9	2.4	1.4	1.7	2.5	1.9	2.7	2.2	2.2	2.17
	2	28	59	2.7	1.7	2.5	1.2	1.5	2.1	1.7	1.9	2.4	2.4	2.01
	3	1	60	3.1	1.3	2.4	1.9	1.5	2.2	1.6	1.7	2.3	2.3	2.03		Average	2.31613	1.48065	2.03548	1.20323	1.1	1.51613	1.56452	1.82903	1.46452	1.46452
	3	2	61	3.1	0.8	2.5	2	1.2	1.8	1.5	2.4	2.5	2.5	2.03		Total	71.8	45.9	63.1	37.3	34.1	47	48.5	56.7	45.4	45.4
	3	3	62	2.8	0.8	2.5	2	1.3	1.5	1.4	2	2.7	2.7	1.97		Std. Dv.	0.660856	0.290309	0.57245	0.258823	0.357771	0.398411	0.473672	0.682736	0.476479	0.476479
	3	4	63	2.3	1.5	2.6	2.1	1.3	2.1	1.4	2.1	2.3	2.3	2		Std. Error	0.12489	0.0548633	0.108183	0.0489129	0.0676123	0.0752926	0.0895157	0.129025	0.0900461	0.0900461
	3	5	64	1.6	1.9	2.6	2.1	1.3	1.7	1.8	1.8	1	1	1.68
	3	6	65	2.8	2	2.5	2.7	1.3	1.7	2.2	1.5	2	2	2.07
	3	7	66	1.9	2.8	2.7	1.4	1.5	2.3	2.6	2.8	2.1	2.1	2.22
	3	8	67	2.6	2.5	2.9	1.3	0.9	1.9	2.5	2.2	2.5	2.5	2.18
	3	9	68	2.7	3.5	3.6	1.7	1.4	3.2	3.2	1.5	3.4	3.4	2.76
	3	10	69	4.2	2.7	3.6	1.4	1.6	3.2	1.3	2.9	3.2	3.2	2.73
	3	11	70	2.7	1.9	3.6	1.2	1.6	2.7	2.2	3.1	2.4	2.4	2.38
	3	12	71	2.9	2.6	3.9	2.1	1.6	2.4	1.4	2.1	1.8	1.8	2.26
	3	13	72	2.2	2.1	3.6	2.3	1.7	2.2	1.3	1.4	2.6	2.6	2.2
	3	14	73	3.3	2.2	3.7	1.2	2.2	2.3	1.5	2.7	2.8	2.8	2.47
	3	15	74	3.7	1.8	3.8	2.4	1.7	2.9	2.6	2.4	1.4	1.4	2.41
	3	16	75	3.4	1.6	3.3	3.4	1.6	1.8	2.2	3.4	1.6	1.6	2.39
	3	17	76	2.6	1.5	2.7	3.1	1.7	2	1	3.1	1.6	1.6	2.09
	3	18	77	4.2	0.9	2.7	2.8	1	1.7	1.3	2.8	2.4	2.4	2.22
	3	19	78	3.9	2.4	2.5	2.5	1.1	3	2.9	2.5	2.6	2.6	2.6
	3	20	79	3.5	2.7	3	2.2	2.4	3	3.3	2.2	2.7	2.7	2.77
	3	21	80	3.2	2.6	2.9	2.6	1.6	3.2	3.1	2.6	2.4	2.4	2.66
	3	22	81	3.3	1.8	3.7	2.3	2.7	2.4	3.8	2.3	2.8	2.8	2.79
	3	23	82	3.6	2.3	3.9	2.4	2.7	2.3	3.5	2.4	2.9	2.9	2.89
	3	24	83	3.4	2.6	4.5	2.7	2.8	3.2	3.6	2.7	2.9	2.9	3.13
	3	25	84	3.8	2.7	4.1	3.1	2.7	3.1	3.8	3.1	3	3	3.24
	3	26	85	2	2.7	3.7	3.2	1.9	2.5	3.5	3.2	2.3	2.3	2.73
	3	27	86	5.5	2.6	3.6	3.6	2.2	2.8	3.2	3.6	2.1	2.1	3.13
	3	28	87	5.5	2.7	3.5	3	2.3	2.8	3.2	3	2.4	2.4	3.08
	3	29	88	4.4	2.1	3.2	3.3	2.1	2.5	2.6	3.3	1.3	1.3	2.61
	3	30	89	4.9	3.1	3.3	3.5	2.3	2.7	2.4	3.5	1.7	1.7	2.91
	3	31	90	4.2	2.6	3.3	3.5	2.2	2.8	2.7	3.5	2.7	2.7	3.02
	4	1	91	3.8	2.8	3.7	3.6	2.1	3.1	3.1	3.6	3.2	3.2	3.22		Average	3.33226	2.17097	3.23871	2.41935	1.7871	2.44839	2.40645	2.57419	2.33548	2.33548
	4	2	92	3.2	3.3	3.7	3.1	1.8	3	3.5	3.1	3.4	3.4	3.15		Total	103.3	67.3	100.4	75	55.4	75.9	74.6	79.8	72.4	72.4
	4	3	93	2.8	3	4.3	2.5	2.7	4.2	3.6	2.5	3.8	3.8	3.32		Std. Dv.	0.965535	0.66693	0.570191	0.71899	0.539594	0.524004	0.871755	0.629798	0.569531	0.569531
	4	4	94	4.5	3.7	4.2	1.8	2.8	3.5	3.6	1.8	3.5	3.5	3.29		Std. Error	0.173415	0.119784	0.102409	0.129134	0.0969139	0.094114	0.156572	0.113115	0.102291	0.102291
	4	5	95	3.9	3.5	3.7	1.7	2.1	3.1	3.6	1.7	3.5	3.5	3.03
	4	6	96	4.1	3.6	3.5	2.6	3.2	4	3.7	2.6	3.8	3.8	3.49
	4	7	97	4.4	2.9	4.3	2.9	3.7	3.8	4.4	2.9	3.9	3.9	3.71
	4	8	98	3.8	3.1	3.5	2	3.5	4.3	4.1	2	4	4	3.43
	4	9	99	3.9	2.2	3.2	2	2.7	3.4	3.4	2	3.9	3.9	3.06
	4	10	100	3.9	3.5	3.4	1	3.3	2.1	2.6	1	3.3	3.3	2.74
	4	11	101	3.5	2.9	2.1	1.7	3.2	2.8	3.7	1.7	3.6	3.6	2.88
	4	12	102	3.6	2.5	3.4	1.3	3.4	3.5	3.8	1.3	1.5	1.5	2.58
	4	13	103	3.7	1.6	3.2	2.8	2.6	4	2.2	2.8	3.1	3.1	2.91
	4	14	104	4.4	2.4	3.7	3.3	3.2	4.2	3.9	5.1	3.5	3.5	3.72
	4	15	105	4.3	3.4	3.7	3.9	2.3	3.5	3.2	4.4	3.5	3.5	3.57
	4	16	106	3.7	3.4	3.7	3.9	2.9	2.7	3.1	4.9	4.5	4.5	3.73
	4	17	107	4.4	2.9	4.4	3.9	3.3	3.2	2.9	5.4	4.3	4.3	3.9
	4	18	108	4	1.1	3.5	4	3	3.5	4.2	5.1	4.3	4.3	3.7
	4	19	109	5.3	3.6	3.8	3.9	3.6	3	4.1	5.3	3.9	3.9	4.04
	4	20	110	4.6	4	3.8	3.3	2.8	3	1.3	5	4.7	4.7	3.72
	4	21	111	5.5	3.8	3.2	3.8	3.3	2.9	3.9	4.2	4.2	4.2	3.9
	4	22	112	5.3	4	3.6	1.4	3.8	2.5	4.2	3.9	3.8	3.8	3.63
	4	23	113	5.3	2.3	3.2	2.1	3.8	3.6	4.5	3.8	4.4	4.4	3.74
	4	24	114	5.3	4.3	2.7	4.1	2.9	4.1	4.3	3.6	4.9	4.9	4.11
	4	25	115	5.8	4	4.2	2.5	3.2	4.1	4.2	3	4.6	4.5	4.01
	4	26	116	4.3	4.4	4	3	4.6	4.9	5	4.9	3.9	3.9	4.29
	4	27	117	4.7	4.4	3.2	4	4.2	4.9	4.6	4.7	4.6	4.6	4.39
	4	28	118	4.7	4.3	2.9	3.3	4.2	5.4	4.1	4.5	4.3	4.3	4.2
	4	29	119	5.6	4.6	3.1	2.8	3.6	5.3	4.4	5.3	4.3	4.3	4.33
	4	30	120	5.9	3.6	3	3.9	4	5.5	4.5	2.9	4.6	4.6	4.25
	5	1	121	5.7	4.1	2.5	2.7	3.9	4.8	4.1	5.3	4.8	4.8	4.27		Average	4.4	3.28065	3.52258	2.89032	3.16129	3.67419	3.69032	3.5	3.85484	3.85161
	5	2	122	4.7	2.6	2.8	2.5	3.6	5.4	2.6	5.7	4.3	4.3	3.85		Total	136.4	101.7	109.2	89.6	98	113.9	114.4	108.5	119.5	119.4
	5	3	123	4.9	5.4	3.2	3.6	4.6	5.2	5.4	5.3	5.7	5.7	4.9		Std. Dv.	0.78613	0.838419	0.503792	0.935363	0.673141	0.873296	0.783732	1.33891	0.685487	0.68209
	5	4	124	5.7	4.6	3.2	4.2	5	4.7	4.6	4.5	4.7	4.7	4.59		Std. Error	0.143527	0.153074	0.0919794	0.170773	0.122898	0.159441	0.143089	0.244449	0.125152	0.124532
	5	5	125	5.5	4.4	4.4	4.2	5	5.6	4.4	3.3	3.5	3.5	4.38
	5	6	126	5	4.2	2.8	3.5	4.1	3.9	4.2	4.3	4.6	4.6	4.12
	5	7	127	5.1	3	2.6	3.8	3.5	3.4	3	5.1	4.2	4.2	3.79
	5	8	128	6.7	4.6	3	4	3.9	4.5	4.6	6.4	3.6	3.6	4.49
	5	9	129	5.5	4.8	3	4.7	4.1	5.1	4.8	5.6	4.8	4.8	4.72
	5	10	130	5	3.3	3.6	4	4.8	4.4	3.3	4.3	3.9	3.9	4.05
	5	11	131	5	4.4	3.1	4.5	4.3	2.8	4.4	5.4	4.1	4.3	4.23
	5	12	132	5.2	5.1	3.4	4	5	3.7	5.1	5.9	4.4	4.4	4.62
	5	13	133	5.7	5.1	3.8	4	5.3	3.4	5.1	5.6	3.7	3.7	4.54
	5	14	134	5.9	5	3.4	4	4.7	4.2	5	5.5	5.1	5.1	4.79
	5	15	135	5.5	5.3	2	4.1	4	4.3	5.3	5.3	5.4	5.4	4.66
	5	16	136	5.5	5.9	3.4	4.6	4.2	3.6	5.9	4.2	5	5	4.73
	5	17	137	5.6	5.9	3.1	4.7	4	4.6	5.9	5.7	4.6	4.6	4.87
	5	18	138	5.8	5.6	4.1	4.6	5.1	4.6	5.6	5.8	3.6	3.6	4.84
	5	19	139	5.9	3.8	3.3	4.5	5	5.2	3.8	6.3	4.9	4.9	4.76
	5	20	140	6.7	5.4	3	3.7	5.3	2.9	5.4	6.5	5.1	5.1	4.91
	5	21	141	7.7	4.3	2.5	4.7	5.1	2.5	4.3	5.1	5.2	5.2	4.66
	5	22	142	6.5	5.4	3.5	5	4.4	5.4	5.4	5.4	5	5	5.1
	5	23	143	6.4	3.3	2.1	5.3	4	5.8	3.3	5.6	5.7	5.7	4.72
	5	24	144	6	5	3.6	5.1	4.9	6.1	5	6.3	5.4	5.4	5.28
	5	25	145	5.1	6.1	3.6	5.1	4.7	4.6	6.1	6.4	5.7	5.7	5.31
	5	26	146	5.5	4	2.5	5.3	3.8	5.7	4	6.8	5.4	5.4	4.84
	5	27	147	5.2	5.2	3.7	5.3	4.3	5.7	5.2	6.5	3.8	3.8	4.87
	5	28	148	5.7	5.2	4.4	4.4	4.9	5	5.2	6.3	3.1	3.1	4.73
	5	29	149	6.5	5.7	4.6	4	6	6	5.7	5.9	3.7	3.7	5.18
	5	30	150	7.1	5.6	3.2	5.3	5.2	5.3	5.6	6.3	4.4	4.4	5.24
	5	31	151	7.3	6.2	3.5	5.8	5.4	5	6.2	6.3	5.4	5.4	5.65
	6	1	152	5.7	5.1	3.7	4.2	4.3	5.8	6.1	6.3	5.6	5.6	5.24		Average	5.79355	4.79032	3.25484	4.36129	4.58387	4.62581	4.79032	5.57742	4.60645	4.6129
	6	2	153	5.9	6.1	4.1	5.2	4.8	5.6	5.8	6.7	5.7	5.7	5.56		Total	179.6	148.5	100.9	135.2	142.1	143.4	148.5	172.9	142.8	143
	6	3	154	4.9	6.1	3	5.5	4.4	6	5	6.8	5.4	5.4	5.25		Std. Dv.	0.746965	0.92713	0.629729	0.748188	0.608329	0.969181	0.92713	0.810642	0.737986	0.734276
	6	4	155	5.2	5.2	4.3	5.6	4.9	5.9	5.5	6.7	5.2	5.2	5.37		Std. Error	0.134159	0.166517	0.113103	0.134378	0.109259	0.17407	0.166517	0.145596	0.132546	0.13188
	6	5	156	6.2	5.6	5	5.4	5.4	6.1	3.4	7.4	5.9	5.9	5.63
	6	6	157	6.3	6.4	6.9	5.6	6.6	6.2	6.5	6.9	6.3	6.3	6.4
	6	7	158	5.3	5.7	4.3	6.5	5.5	5.3	4.4	5.9	5.6	5.6	5.41
	6	8	159	5.4	5.6	1.7	6.7	4.6	5.4	5.5	6.3	5	5	5.12
	6	9	160	5.8	5.9	1.9	6.5	4.7	5.1	5.6	7	5	5	5.25
	6	10	161	5.7	6.4	4.6	6.6	5.3	5.8	5.5	5.7	6	6	5.76
	6	11	162	6	7.2	5	6	5.9	6.5	6.3	5.6	6.6	6.6	6.17
	6	12	163	5.7	7.9	5.6	6.1	6.9	7.2	6.1	5.8	6.9	6.9	6.51
	6	13	164	5.8	7	6	5.5	6.6	6.7	6.5	6.3	6.3	6.3	6.3
	6	14	165	5.7	6	5.8	5.1	5.9	6.5	6.4	6.5	6.3	6.3	6.05
	6	15	166	5.8	6.1	3	5.5	5.6	6.3	5.7	6.3	6.3	6.3	5.69
	6	16	167	6	6.8	3.7	6.2	5.9	6.6	6	6.6	6.1	6.1	6
	6	17	168	5.4	6.4	4.6	6.8	5.9	6.7	6.3	6.7	6	6	6.08
	6	18	169	5.8	5.8	7	7.1	6.5	6.2	7.6	6.2	5.4	5.4	6.3
	6	19	170	5.6	6.5	7.3	7	6.6	5.6	8.1	7.7	5.9	5.9	6.62
	6	20	171	5.7	7.1	5.6	7.2	5.9	6.8	7.4	7.2	6.5	6.5	6.59
	6	21	172	5.6	6.9	7.1	6.9	5.9	6.7	6.6	6.7	6.9	6.9	6.62
	6	22	173	5.8	8.2	6.5	7	5.5	7.4	5.9	7.4	8	8	6.97
	6	23	174	6.9	7.2	5.8	5.8	5.2	7.2	6	7.2	6.8	6.8	6.49
	6	24	175	7.9	5.8	5.1	5.6	5.4	5.9	6.4	5.9	5.7	5.7	5.94
	6	25	176	6.1	6.8	5.4	6.6	5	6.8	5.5	7.2	6.2	6.2	6.18
	6	26	177	6.4	7.9	6	7.2	5.3	8.3	3.3	6.9	8.2	8.2	6.77
	6	27	178	5.2	7.1	5.5	6.8	5.5	7.1	3.9	6.6	6.4	6.4	6.05
	6	28	179	6.5	6.3	6.5	6	6.5	6.8	6.5	6.4	6.5	6.5	6.45
	6	29	180	6.2	6.2	7.1	6.7	6.9	6.4	7.8	6.2	6.1	6.1	6.57
	6	30	181	5.1	7	6.4	6.1	5.3	7.5	6.6	6.5	7	7	6.45
	7	1	182	5.5	7.2	5	7	5.5	7.1	7.2	6.7	7.1	7.1	6.54		Average	5.9	6.46774	5.09677	6.15484	5.61613	6.36774	5.94839	6.57742	6.16774	6.16774
	7	2	183	5.8	7.3	6.7	7.1	4.9	6.9	7	6.7	7.2	7.2	6.68		Total	182.9	200.5	158	190.8	174.1	197.4	184.4	203.9	191.2	191.2
	7	3	184	5.6	7.7	6.3	7.3	4.1	8	6.1	6.9	8.2	8.2	6.84		Std. Dv.	0.629285	0.764804	1.51162	0.731591	0.719767	0.754271	1.1171	0.523902	0.750727	0.750727
	7	4	185	6.1	7.8	6.8	7.3	5.7	8.1	6.7	6.8	8.3	8.3	7.19		Std. Error	0.114891	0.139633	0.275982	0.13357	0.131411	0.13771	0.203954	0.0956509	0.137063	0.137063
	7	5	186	6.5	7.1	7.4	6.4	5.8	7.7	6.9	7.4	7.7	7.7	7.06
	7	6	187	6.4	7.8	6.5	6.3	5	7.9	6.3	6.5	7.8	7.8	6.83
	7	7	188	6.1	6.5	5.7	7.6	4.6	7.5	5.5	5.7	5.9	5.9	6.1
	7	8	189	5.7	6.2	4.9	8.3	5.5	6.4	5.7	6.5	5.6	5.6	6.04
	7	9	190	5.4	7.3	6.8	7.1	5.8	7.4	6.6	6.8	6.8	6.8	6.68
	7	10	191	5.9	8.5	6.7	6.2	5.6	6.3	6.6	7.4	8	8	6.92
	7	11	192	5.5	7.9	6.7	6.8	5.2	7.7	6.4	6.5	7.7	7.7	6.81
	7	12	193	5.2	7.4	6.2	7.1	5.5	7.2	6.3	5.7	6.9	6.9	6.44
	7	13	194	5.5	7	6	6.8	5.4	7.3	6.2	5.9	6.9	6.9	6.39
	7	14	195	5.9	6.2	6.5	7.4	6.1	7	6.5	6	6.8	6.8	6.52
	7	15	196	5.7	6.2	7	7.7	6.3	7.4	6.8	5.4	7.3	7.3	6.71
	7	16	197	5.5	5.7	6.8	8.1	5.9	6.8	6.4	5.7	6.3	6.3	6.35
	7	17	198	5.7	6.1	5.8	7.1	5.1	6.6	6	6	6.4	6.4	6.12
	7	18	199	5	6.2	5.7	6	5.2	6.3	5.9	6.3	6.6	6.6	5.98
	7	19	200	5.4	6.6	6.1	5.6	5.4	6.4	6	6.6	6.6	6.6	6.13
	7	20	201	5.4	7	6.1	5.5	5.5	6.7	5.7	7	6.6	6.6	6.21
	7	21	202	5.4	7	5.7	5.6	5.2	7.1	4.9	6.4	6.8	6.8	6.09
	7	22	203	5.2	6.7	6	5.4	5.5	6.8	5.8	6.7	6.7	6.7	6.15
	7	23	204	5.5	6.6	7.9	6.6	7.5	6.5	7.6	5.9	6.4	6.4	6.69
	7	24	205	4.4	6.9	7.8	3.4	7.3	7	8.6	5.5	6.9	6.9	6.47
	7	25	206	5.3	6.4	6.7	5.8	6.4	6.7	7.2	6	6.7	6.7	6.39
	7	26	207	5.7	6.2	7.5	6.1	7.2	5.5	7.3	5.9	6	6	6.34
	7	27	208	5.2	7	6.8	6	5.9	6.9	6.2	5.3	7	7	6.33
	7	28	209	4.3	5.8	7.2	6.5	6.4	6	6.9	5.6	6.1	6.1	6.09
	7	29	210	4.7	5.5	7.4	5.6	6.7	4.4	7.7	5.9	5.9	5.9	5.97
	7	30	211	4.1	6.1	7	5.5	6.2	4.6	6.8	5.9	6.2	6.2	5.86
	7	31	212	4.5	5.9	6.5	5.3	5.9	5.8	6.6	6.4	6	6	5.89
	8	1	213	4.3	6.7	5.8	5.3	5	4.3	6	6.1	6.9	6.9	5.73		Average	5.42258	6.76774	6.52258	6.46774	5.75161	6.77419	6.52903	6.25806	6.81935	6.81935
	8	2	214	4.6	6.3	6.4	6.1	5.5	6.1	6.3	5.8	6.9	6.9	6.09		Total	168.1	209.8	202.2	200.5	178.3	210	202.4	194	211.4	211.4
	8	3	215	4.3	5.7	6.7	7.2	5.8	6.2	6.7	5.3	6.1	6.1	6.01		Std. Dv.	0.570795	0.730017	0.728793	1.00611	0.758451	0.87062	0.732663	0.56319	0.700676	0.700676
	8	4	216	4.3	5.5	6.6	6.8	5.6	5.9	6.1	5.4	5.7	5.7	5.76		Std. Error	0.102518	0.131115	0.130895	0.180703	0.136222	0.156368	0.13159	0.101152	0.125845	0.125845
	8	5	217	4.4	5.5	6.9	6.2	6	5.5	5.9	5.5	5.4	5.4	5.67
	8	6	218	4.8	6.1	7.5	6.2	6.4	3.7	6.8	5	5.9	5.9	5.83
	8	7	219	4.4	7	7.3	6.9	6.3	5.7	7.2	5.2	7.2	7.2	6.44
	8	8	220	4.1	6.7	6.9	5.8	6	5.3	7	5.4	6.8	6.8	6.08
	8	9	221	3.9	6.5	6.5	6.1	5.5	6.2	6.5	5.5	6.4	6.4	5.95
	8	10	222	3.7	6	6	4.4	5.4	6	6.1	5.4	6.2	6.2	5.54
	8	11	223	3.3	6.3	6.7	5.6	5.7	6.6	6.7	5.7	7	7	6.06
	8	12	224	3.9	5.3	6.6	5.2	5.6	5.5	6.1	4.9	5.6	5.6	5.43
	8	13	225	3.8	4.8	6.1	5.2	5.5	5	5.9	5.5	4.9	4.9	5.16
	8	14	226	3.4	5.4	6.7	5.3	5.8	5.5	6.9	5.8	5.8	5.8	5.64
	8	15	227	3.4	4.9	6.9	5	6.3	5.5	6.8	5.8	5.3	5.3	5.52
	8	16	228	3.6	4.9	6.3	5.1	5.4	5.2	6.6	4.5	5	5	5.16
	8	17	229	3.2	5.5	6.5	6.1	5.6	5.5	6.5	2.9	5.4	5.4	5.26
	8	18	230	2.6	5.8	6.6	6.3	4.9	5.3	6.3	3.8	5.3	5.3	5.22
	8	19	231	2.7	5.7	5.9	5.9	4.2	5.5	5	4.9	5.2	5.2	5.02
	8	20	232	2.4	6	5.9	4.7	4.1	5.9	5.6	4.6	6.1	6.1	5.14
	8	21	233	3.1	6.2	5.1	4.9	3.8	5.9	5.6	4.6	6.4	6.4	5.2
	8	22	234	2.4	5.9	5.8	5	4.8	6	5.6	5.6	6.4	6.4	5.39
	8	23	235	2.9	4.9	5.4	5.8	4.6	5.2	5.5	5.3	4.7	4.7	4.9
	8	24	236	3.1	5.4	6	5.7	5.2	5.8	5.5	4.4	5.6	5.6	5.23
	8	25	237	2.6	5.1	5.4	5	4.2	5.7	5.4	3.8	5.2	5.2	4.76
	8	26	238	2.5	4.8	4.6	4.8	5.5	5.2	5.6	3.9	4.9	4.9	4.67
	8	27	239	2	4.5	5.3	4.9	5.9	5.4	6	4.3	4.3	4.3	4.69
	8	28	240	2.5	5.4	5.4	4.7	5.4	5.6	5.9	4.3	5.3	5.3	4.98
	8	29	241	1.7	6	4.9	4.4	4.9	6.2	5.4	4.6	6.3	6.3	5.07
	8	30	242	1.7	5.7	4.8	4.7	4.8	5.8	5.1	4.7	5.9	5.9	4.91
	8	31	243	2	5.4	4.7	4.5	4.4	5.7	4.9	4.3	5.4	5.4	4.67
	9	1	244	2.2	4.4	5	4.6	4.7	4.7	5.5	4.3	4.5	4.5	4.44		Average	3.27742	5.67419	6.07097	5.47742	5.29355	5.57742	6.04839	4.92903	5.79032	5.79032
	9	2	245	2	5.2	4.3	4.4	4.5	5.4	5.2	4.3	5.4	5.4	4.61		Total	101.6	175.9	188.2	169.8	164.1	172.9	187.5	152.8	179.5	179.5
	9	3	246	2	5.2	4.9	4.5	4.5	5.3	4.8	4.6	5.4	5.4	4.66		Std. Dv.	0.89841	0.625549	0.781108	0.760136	0.683099	0.560779	0.616912	0.740357	0.736367	0.736367
	9	4	247	2.5	5.5	5	4.4	4.7	5.2	5.2	4.1	5.3	5.3	4.72		Std. Error	0.161359	0.112352	0.140291	0.136524	0.122688	0.100719	0.110801	0.132972	0.132255	0.132255
	9	5	248	2	5.6	4.8	4.7	4.7	5	5.1	3.7	5.3	5.3	4.62
	9	6	249	1.6	4.2	4.7	4.5	4.6	4.5	4.9	3.9	4.3	4.3	4.15
	9	7	250	1.8	4.1	4.5	5.1	4.9	4.2	5	3.7	3.8	3.8	4.09
	9	8	251	2.2	4.4	4.2	5.4	4.6	4.5	4.6	3.2	4.5	4.5	4.21
	9	9	252	2.2	4.4	4.6	5.1	4.4	4.3	4.7	3	4.3	4.3	4.13
	9	10	253	2.5	4.1	4.2	4.4	3.9	4.3	4.4	2.7	4.6	4.6	3.97
	9	11	254	3.1	5.3	3.6	4.2	3.9	5.2	4.2	3.1	5.8	5.8	4.42
	9	12	255	2.7	3.8	2.9	3.8	3.9	4.8	4.1	3.6	4.8	4.8	3.92
	9	13	256	2.2	4.3	4.2	3.9	4.4	4.9	4.8	3	4.8	4.8	4.13
	9	14	257	1.9	3.7	3.6	4.6	4.2	4.6	4.1	2.1	4	4	3.68
	9	15	258	1.4	3.7	3.2	3.4	3.9	4.1	4.1	2	3.7	3.7	3.32
	9	16	259	2	3.6	3.5	3.9	3.8	4.1	3.9	2.1	3.8	3.8	3.45
	9	17	260	2.3	3.5	3.9	4.9	4.4	3.9	4.3	2.5	3.6	3.6	3.69
	9	18	261	1.6	3.3	3.3	3.7	4.5	3.3	4	2.5	3.7	3.7	3.36
	9	19	262	1.6	3.7	3.9	3.7	4.3	3.6	4.7	2.8	4.2	4.2	3.67
	9	20	263	1.7	3.5	2.5	3.5	3.4	4.2	3.3	3	4.6	4.6	3.43
	9	21	264	1.6	3.4	2.9	3.4	3	4	3.6	2.5	4.4	4.4	3.32
	9	22	265	1.6	3.6	2.8	3.8	3	4.1	3.4	2.4	4	4	3.27
	9	23	266	1.5	3.8	3	2.9	3.2	3.6	3.7	2.8	3.8	3.8	3.21
	9	24	267	1.6	3.9	2.9	3.8	3.3	4	3.2	3.2	4	4	3.39
	9	25	268	1.8	3.6	2.5	3.5	2	3.7	3.1	3.4	3.6	3.6	3.08
	9	26	269	1.4	3.8	2.5	2.7	3.4	3.8	3.4	2.8	3.8	3.8	3.14
	9	27	270	1.5	3.4	2.4	2.7	3.6	3.6	3.6	2.8	3.4	3.4	3.04
	9	28	271	1.4	3	3	3.2	3.5	3.6	2.3	3.6	3.9	3.9	3.14
	9	29	272	1.6	3	1.6	3.1	2.7	3.7	2.9	2.2	3.7	3.7	2.82
	9	30	273	1.5	3	2.8	2.5	3.4	3.7	3.3	1.5	3.5	3.5	2.87
	10	1	274	1.5	2.9	2.7	2.6	3.7	2.7	3.3	1.4	2.9	2.9	2.66		Average	1.90323	4.04516	3.60968	3.96129	3.92581	4.30968	4.13871	3.0871	4.31935	4.31935
	10	2	275	1.5	2.8	2.6	2.7	3.5	2.5	3.1	1.4	2.9	2.9	2.59		Total	59	125.4	111.9	122.8	121.7	133.6	128.3	95.7	133.9	133.9
	10	3	276	1.4	3.3	2.5	2.6	3.3	3	3.3	1.8	3.4	3.4	2.8		Std. Dv.	0.419908	0.763692	0.927849	0.762748	0.700936	0.632115	0.795268	0.779633	0.673013	0.673013
	10	4	277	1.2	3.2	1.9	2.7	3.2	3	2.8	1.4	3.4	3.4	2.62		Std. Error	0.0766643	0.13943	0.169401	0.139258	0.127973	0.115408	0.145195	0.142341	0.122875	0.122875
	10	5	278	1.5	3.1	1.5	2.9	2.9	2.3	3	1.6	3	3	2.48
	10	6	279	1.5	2.7	2.4	3	3	2	3.2	1.5	2.9	2.8	2.5
	10	7	280	1.1	2.6	1.8	2.7	2.8	1.9	3.3	1.8	3	3	2.4
	10	8	281	1.1	2.7	2.7	2.4	3	2	3.2	1.5	3.1	3.1	2.48
	10	9	282	1.1	2.4	2.2	2.5	2.6	2.6	2.8	1.6	2.9	2.9	2.36
	10	10	283	1	2.4	1.6	3.2	2.2	2.9	2.4	1.6	2.9	2.9	2.31
	10	11	284	1.3	2.6	1.7	2.5	2.1	2.8	1.9	1.5	2.9	2.9	2.22
	10	12	285	1.1	2.9	2.2	2.5	2.4	3	2.2	2.3	2.8	2.8	2.42
	10	13	286	1	1.5	1.7	2.5	2.2	2.8	2.3	1.8	2.7	2.7	2.12
	10	14	287	1.1	1.3	1.8	2.3	2.1	2.6	1.5	1.9	2.8	2.8	2.02
	10	15	288	1.1	2.8	2.5	1.5	2.7	2.9	2.7	2.1	3	3	2.43
	10	16	289	1	3.4	2.3	2.7	2.5	3	2.1	1.8	3	3	2.48
	10	17	290	1	2.9	1.9	2.1	2.1	2.9	2	1.7	3.4	3.4	2.34
	10	18	291	1.2	2.8	1.8	2	2.3	2.1	1.9	1.5	2.9	2.9	2.14
	10	19	292	1.1	3	2.2	1.9	1.9	2.2	1.2	1.2	2.7	2.7	2.01
	10	20	293	0.8	4.2	2.9	2.1	1.8	2.6	1.4	1.3	3.7	3.7	2.45
	10	21	294	0.9	2.3	3.5	1.9	2.3	2.1	2.2	1.3	2.4	2.4	2.13
	10	22	295	1	2.2	2.7	1.9	1.8	2.3	2.1	1.4	2.3	2.3	2
	10	23	296	1.5	2.3	1	1.9	1.9	2.4	1.6	1.3	2.3	2.3	1.85
	10	24	297	0.9	2	1	1.8	1.4	2	1.8	1.2	2.1	2.1	1.63
	10	25	298	1.2	1.9	2.9	1.6	1.2	1.5	1.9	0.9	2	2	1.71
	10	26	299	1.1	2.2	2.7	1.9	1.5	1.7	1.7	1.1	1.9	1.9	1.77
	10	27	300	1.2	1.8	2.1	2.1	1.1	1.6	2	1.4	1.9	1.9	1.71
	10	28	301	1.3	1.5	2.3	1.3	1.3	1.8	1.6	1.4	2	2	1.65
	10	29	302	0.8	1.9	2.4	1.4	1.4	2.1	2.1	1.5	1.7	1.7	1.7
	10	30	303	0.9	1.8	1.9	1.5	2.1	2.3	2.5	1.5	2.2	2.2	1.89
	10	31	304	1	1.4	1.3	1.4	1.2	2	1.1	1.3	1.8	1.8	1.43
	11	1	305	1.1	1.1	1.6	1.7	1.4	1.8	1.3	1.2	1.3	1.3	1.38		Average	1.14194	2.47742	2.15161	2.19677	2.24194	2.37419	2.26452	1.51613	2.67419	2.67097
	11	2	306	0.8	1.4	2.1	1.6	1.6	1.8	1.4	1.1	0.8	0.8	1.34		Total	35.4	76.8	66.7	68.1	69.5	73.6	70.2	47	82.9	82.8
	11	3	307	0.8	1.4	2.1	1	1.5	1.6	1.4	0.8	1.4	1.4	1.34		Std. Dv.	0.209403	0.662173	0.572638	0.515418	0.709824	0.456047	0.656023	0.288787	0.527869	0.526747
	11	4	308	0.7	1.6	1.8	0.9	1.2	2.3	1.4	0.8	1.7	1.7	1.41		Std. Error	0.0376098	0.11893	0.102849	0.0925718	0.127488	0.0819084	0.117825	0.0518677	0.094808	0.0946065
	11	5	309	1	1.6	2.5	1.1	1.5	1.8	1.3	1	1.8	1.8	1.54
	11	6	310	0.9	1.2	2.7	1.3	1.4	1.9	1.5	0.9	1.8	1.8	1.54
	11	7	311	1.3	1.8	2.4	1.4	1.7	1.9	1.7	0.9	1.9	1.9	1.69
	11	8	312	1.4	1.6	1.8	1.3	1.5	1.3	1.7	0.9	1.8	1.8	1.51
	11	9	313	0.9	1.5	2.1	1.6	1.6	0.9	1.6	0.8	1.6	1.6	1.42
	11	10	314	0.8	1.4	2.8	1.2	2.2	1.1	1.7	0.7	1.5	1.4	1.48
	11	11	315	0.8	1.6	2.3	1.3	2	1.2	1.8	0.7	1.6	1.6	1.49
	11	12	316	0.8	1.6	2.1	1.1	1.6	1.4	1.7	0.6	1.6	1.6	1.41
	11	13	317	0.9	1.5	2.4	1	1.4	1.4	1.5	0.8	1.5	1.5	1.39
	11	14	318	0.8	1.3	2.4	0.8	1	1.5	1.2	0.7	1.5	1.5	1.27
	11	15	319	0.8	1.3	1.5	0.9	1.2	1.5	1	0.8	1.5	1.5	1.2
	11	16	320	0.7	1.3	1.6	1	1.1	1.5	1.1	0.8	1.5	1.5	1.21
	11	17	321	0.9	1	1.6	1	1.1	1.1	0.8	0.8	1.1	1.1	1.05
	11	18	322	1	1.1	1.7	0.7	1.3	1.3	1.2	0.9	1.2	1.2	1.16
	11	19	323	1.1	0.9	1.7	0.7	1.2	1.4	1.1	1.1	1.2	1.2	1.16
	11	20	324	0.8	1	1.1	1	1	1.5	0.9	1.1	1.2	1.2	1.08
	11	21	325	0.8	1	1.1	1	1.3	1.5	0.9	0.9	1.3	1.3	1.11
	11	22	326	0.9	1	1.3	1	1.3	1.2	0.8	1.1	1.2	1.2	1.1
	11	23	327	0.9	1.1	1.5	0.9	1.1	1.1	0.8	1.1	1.1	1.1	1.07
	11	24	328	1	0.9	1.7	0.8	1.3	0.9	0.8	1	1	1	1.04
	11	25	329	1.5	0.9	1.7	0.8	1.3	0.9	0.5	1.1	1	1	1.07
	11	26	330	1.4	0.8	1.7	0.8	0.9	0.9	0.7	0.9	1	1	1.01
	11	27	331	1	0.8	1.9	0.8	0.8	0.7	0.8	0.8	0.9	0.9	0.94
	11	28	332	1	0.8	1.7	0.8	1.1	0.8	1	0.8	0.9	0.9	0.98
	11	29	333	1.1	0.5	1.8	0.8	1.1	0.6	0.8	0.8	0.9	0.9	0.93
	11	30	334	1.1	1	1.4	0.8	1	0.8	0.7	1.1	0.9	0.9	0.97
	12	1	335	0.9	0.9	0.9	0.8	0.9	0.8	0.6	1.3	0.6	0.6	0.83		Average	0.967742	1.20645	1.85161	1.04839	1.31935	1.34194	1.16774	0.912903	1.33871	1.33548
	12	2	336	0.9	0.9	1.3	1	1.2	0.7	0.8	0.9	0.7	0.7	0.91		Total	30	37.4	57.4	32.5	40.9	41.6	36.2	28.3	41.5	41.4
	12	3	337	1.1	0.9	1.4	1	1.6	0.8	1.2	0.8	0.8	0.8	1.04		Std. Dv.	0.205568	0.31616	0.444125	0.277934	0.304871	0.422512	0.367321	0.168804	0.328306	0.327158
	12	4	338	1.2	0.7	0.8	0.9	1	0.7	0.8	0.6	0.7	0.7	0.81		Std. Error	0.0375313	0.0577226	0.0810858	0.0507436	0.0556615	0.0771397	0.0670633	0.0308192	0.0599402	0.0597306
	12	5	339	0.8	0.9	1.1	0.7	1	0.5	0.7	0.5	0.6	0.6	0.74
	12	6	340	0.8	0.9	1.1	1	1.1	0.8	0.9	0.9	0.8	0.8	0.91
	12	7	341	0.9	0.8	1	0.9	0.9	0.6	0.7	0.8	0.7	0.7	0.8
	12	8	342	0.8	0.7	1	0.7	0.9	0.5	0.8	0.8	0.7	0.7	0.76
	12	9	343	0.9	0.6	1.3	0.5	1	0.5	1	0.8	0.6	0.6	0.78
	12	10	344	1	0.6	1.1	0.5	1.1	0.5	0.5	0.8	0.6	0.6	0.73
	12	11	345	0.8	0.6	0.9	0.6	0.9	0.4	0.8	0.8	0.7	0.7	0.72
	12	12	346	0.7	0.7	0.9	0.7	1.2	0.4	0.9	0.8	0.7	0.7	0.77
	12	13	347	0.8	0.7	0.9	0.8	0.9	0.6	0.8	0.8	0.7	0.7	0.77
	12	14	348	0.9	0.9	0.8	0.9	0.8	0.7	0.7	0.8	0.7	0.7	0.79
	12	15	349	0.9	0.9	0.9	0.7	0.8	0.6	0.9	1	0.8	0.8	0.83
	12	16	350	0.6	0.8	1	0.7	0.9	0.6	1	1	0.7	0.7	0.8
	12	17	351	0.7	1	0.8	0.8	0.7	0.7	0.9	0.9	0.7	0.7	0.79
	12	18	352	1	1	0.9	1	0.8	0.6	0.9	0.7	0.8	0.8	0.85
	12	19	353	1.1	0.9	0.8	1	0.9	0.6	0.9	1	0.6	0.6	0.84
	12	20	354	1.1	1	1.2	0.9	1.2	0.6	1.1	0.9	0.6	0.6	0.92
	12	21	355	0.6	0.9	1.2	0.8	1.2	0.7	1	0.7	0.6	0.6	0.83
	12	22	356	0.7	0.9	0.6	0.9	0.9	0.7	0.8	0.5	0.6	0.6	0.72
	12	23	357	0.8	1	0.7	0.7	0.8	0.8	0.6	0.5	0.8	0.8	0.75
	12	24	358	0.6	0.7	0.6	0.5	0.8	0.8	0.7	1.2	0.7	0.7	0.73
	12	25	359	0.7	1.1	0.6	0.6	0.9	0.8	0.8	1.2	0.9	0.9	0.85
	12	26	360	0.7	1.1	0.9	0.6	0.9	0.6	0.9	0.9	1	1	0.86
	12	27	361	0.7	0.8	1.1	0.6	0.8	0.7	0.8	0.8	0.7	0.7	0.77
	12	28	362	0.6	0.8	1.3	0.7	0.8	0.8	0.8	0.8	0.7	0.7	0.8
	12	29	363	0.8	0.8	1.1	0.9	0.8	0.8	0.8	0.9	0.7	0.7	0.83
	12	30	364	0.8	0.7	1.1	0.7	0.9	0.6	1.1	0.9	0.6	0.6	0.8
	12	31	365	0.8	0.6	0.9	0.5	0.8	0.6	0.8	0.8	0.7	0.7	0.72
																Average	0.829032	0.832258	0.974194	0.76129	0.948387	0.648387	0.83871	0.841935	0.703226	0.703226
			TOTAL	1102.7	1224.7	1203	1153.6	1117.3	1240.4	1231.2	1178.5	1249.9	1249.8	1195.11		Total	25.7	25.8	30.2	23.6	29.4	20.1	26	26.1	21.8	21.8
																Std. Dv.	0.159569	0.144654	0.212866	0.164676	0.184157	0.12075	0.152047	0.185785	0.0948116	0.0948116
																Std. Error	0.0286595	0.0259806	0.0382318	0.0295767	0.0330757	0.0216874	0.0273084	0.033368	0.0170287	0.0170287
