# Supplementary material for: Assessing of evapotranspiration models using limited climatic data in Southeast Anatolian Project Region of Turkey
Source: PeerJ. 2021 Jun 9;9:e11571. doi: 10.7717/peerj.11571 (PMC8197036; doi:10.7717/peerj.11571)
Supplement: Supplemental Information 4 [file peerj-09-11571-s004.xls]

## Sheet: ETo
	Daily ETo estimates (mm/day)
	YEAR	MON	DAY	DOY	PM	PEN	FAOP	PT	FAOR	FAOB	SCSB	HARG	Epan	PMD
	2003	1	1	1	0.6	0.9	0.9	0.5	0.1	0.1	0.6	0.8	-999	0.7
	2003	1	2	2	0.8	1	1	0.6	-0.1	0.2	0.8	0.8	-999	0.9
	2003	1	3	3	0.5	0.7	0.7	0.6	0.1	0.2	1.1	0.7	-999	0.6
	2003	1	4	4	1.2	1.4	1.5	0.6	1.2	1	1.1	0.7	-999	1.5
	2003	1	5	5	0.5	0.6	0.6	0.6	0.2	0.2	1.2	0.7	-999	0.6
	2003	1	6	6	0.7	1	1	0.7	0	0.4	1.5	0.9	-999	0.8
	2003	1	7	7	0.7	1	1	0.8	1	0.9	1.6	0.9	-999	0.8
	2003	1	8	8	0.7	1	1	0.6	0.4	0.4	1	0.9	-999	0.7
	2003	1	9	9	0.6	0.9	0.9	0.6	0	0.2	0.9	0.6	-999	0.6
	2003	1	10	10	0.7	1	1	0.6	0.4	0.5	1	0.6	-999	0.7
	2003	1	11	11	0.8	1	1.1	0.7	1.5	1	1.2	1	-999	0.8
	2003	1	12	12	0.6	0.9	0.9	0.6	1	0.6	0.8	0.6	-999	0.7
	2003	1	13	13	0.7	0.9	0.9	0.8	1.1	0.7	1.3	1.2	-999	0.7
	2003	1	14	14	0.7	1	1	0.7	1.1	0.8	1	0.6	-999	0.7
	2003	1	15	15	0.6	0.9	0.9	0.7	0.9	0.6	0.8	0.9	-999	0.7
	2003	1	16	16	0.8	1	1.1	0.6	1.1	0.8	0.8	1.1	-999	1
	2003	1	17	17	0.8	1.2	1.2	0.6	1.2	0.7	0.7	1.1	-999	1
	2003	1	18	18	0.7	1	1	0.6	1.2	0.6	0.7	1.1	-999	0.8
	2003	1	19	19	0.6	0.7	0.7	0.8	0.8	0	0.8	1.2	-999	0.6
	2003	1	20	20	0.5	0.6	0.6	0.7	0.7	-0.1	0.7	1.2	-999	0.5
	2003	1	21	21	0.5	0.6	0.6	0.8	0.7	0	0.8	0.9	-999	0.5
	2003	1	22	22	0.7	1	1	0.7	0.5	0.5	0.9	0.8	-999	0.8
	2003	1	23	23	0.7	1	1	0.8	1.4	0.8	1	1.2	-999	0.8
	2003	1	24	24	0.8	1	1	0.9	1.3	0.8	1.1	1.5	-999	0.9
	2003	1	25	25	0.8	1	1.1	0.9	1.4	0.8	1	1.5	-999	0.9
	2003	1	26	26	0.8	1	1.1	0.9	1.5	0.8	1	1.5	-999	0.9
	2003	1	27	27	0.9	1.1	1.2	0.9	1.6	1	1.1	1.4	-999	0.9
	2003	1	28	28	0.5	0.6	0.6	0.7	0.1	0.1	1.1	0.7	-999	0.5
	2003	1	29	29	1.5	1.7	1.8	0.8	1.4	1.2	0.9	1	-999	1.9
	2003	1	30	30	0.9	1	1	1.2	1.4	0.4	1.4	1.2	-999	0.9
	2003	1	31	31	1.2	1.5	1.7	1	1.9	1.6	1.4	1.1	-999	1.4
	2003	2	1	32	1	1.2	1.2	1.2	1.5	0.8	1.6	1.5	-999	1.1
	2003	2	2	33	0.8	1	1	1.2	1.2	0.5	1.5	1.6	-999	0.9
	2003	2	3	34	1	1.2	1.2	1.5	1.6	0.8	1.9	1.3	-999	1
	2003	2	4	35	0.9	1	1	1.3	1.4	0.4	1.3	1.1	-999	0.9
	2003	2	5	36	0.9	1	1	1.3	1.3	0.4	1.4	1.4	-999	0.9
	2003	2	6	37	0.9	1	1	1.2	1.2	0.4	1.3	1	-999	0.9
	2003	2	7	38	1.2	1.4	1.5	1.2	1.5	1.3	1.6	1.8	-999	1.3
	2003	2	8	39	1.2	1.5	1.6	1.3	1.7	1.4	1.6	1.4	-999	1.3
	2003	2	9	40	1.2	1.5	1.6	1.2	1.8	1.1	1.4	1.3	-999	1.3
	2003	2	10	41	1	1.2	1.3	1.1	1.3	0.7	1	1.1	-999	1
	2003	2	11	42	0.7	0.9	0.9	0.7	0	0.2	0.8	1.2	-999	0.7
	2003	2	12	43	0.8	0.9	1	0.7	0.1	0.1	0.6	1.3	-999	0.9
	2003	2	13	44	0.5	0.6	0.6	0.6	0	0	0.6	0.8	-999	0.5
	2003	2	14	45	0.8	0.9	0.9	1.1	0.9	0	0.7	0.6	-999	0.8
	2003	2	15	46	0.8	1	1	1.2	1.1	0.1	0.8	0.9	-999	0.8
	2003	2	16	47	1.1	1.3	1.4	1.4	1.7	0.5	0.8	1.1	-999	1.2
	2003	2	17	48	1.2	1.3	1.4	1.4	1.6	0.7	1	1.5	-999	1.2
	2003	2	18	49	1.1	1.3	1.4	1.2	1.6	0.6	0.7	0.9	-999	1.2
	2003	2	19	50	1.1	1.4	1.6	1.2	1.8	0.8	0.6	0.5	-999	1.2
	2003	2	20	51	1.2	1.4	1.5	1.4	1.7	0.9	0.9	1.3	-999	1.3
	2003	2	21	52	1.1	1.3	1.4	1.3	1.4	0.7	0.9	1.2	-999	1.2
	2003	2	22	53	1	1.2	1.3	1.1	1.1	0.4	0.7	1.2	-999	1.1
	2003	2	23	54	1.1	1.3	1.4	1.3	1.4	0.4	0.6	1.3	-999	1.2
	2003	2	24	55	0.9	1	1.1	0.9	0.4	0.5	1.2	1.2	-999	0.9
	2003	2	25	56	0.9	1.1	1.1	1.1	0.7	0.6	1.3	1.5	-999	1
	2003	2	26	57	0.9	1	1	1.2	0.8	0.1	0.7	0.8	-999	0.9
	2003	2	27	58	1.3	1.5	1.6	1.6	1.8	0.5	0.8	1.4	-999	1.3
	2003	2	28	59	1.3	1.5	1.6	1.6	1.7	0.5	0.9	1.7	-999	1.3
	2003	3	1	60	1.2	1.4	1.5	1.7	1.6	0.3	0.8	1.9	-999	1.3
	2003	3	2	61	1.5	1.7	1.9	1.6	2.1	0.9	0.7	1.6	-999	1.7
	2003	3	3	62	1.5	1.7	1.9	1.8	2	0.8	1.1	1.4	-999	1.5
	2003	3	4	63	1.6	1.8	1.9	2	2	1.2	1.9	2.1	-999	1.7
	2003	3	5	64	1.7	1.9	2	2	2.1	1.3	1.7	2.2	-999	1.8
	2003	3	6	65	2.7	3.1	3.4	2	3.6	3	1.9	2	-999	3.2
	2003	3	7	66	2.1	2.6	2.8	2.1	3.2	2.4	1.9	1.8	-999	2.3
	2003	3	8	67	2	2.3	2.6	2.1	2.9	2.1	1.7	2.6	-999	2.2
	2003	3	9	68	2.1	2.5	2.7	2.2	3.1	2.6	2.1	2.5	-999	2.2
	2003	3	10	69	2	2.6	2.8	2.1	3.3	2.6	1.7	1.4	-999	2.1
	2003	3	11	70	2	2.4	2.6	2.1	2.7	2.2	1.7	2.3	-999	2.2
	2003	3	12	71	1.5	1.8	1.9	1.3	1.2	1.3	1.5	1.7	-999	1.6
	2003	3	13	72	1	1.1	1.1	1.2	0.6	0.6	1.7	2.4	-999	1
	2003	3	14	73	0.8	0.9	0.9	0.9	0.2	0.4	1.7	2.4	-999	0.9
	2003	3	15	74	2.2	2.6	2.9	2.3	2.9	2.5	2.2	2.1	-999	2.4
	2003	3	16	75	2.8	3	3.3	2.1	3	2.6	2.1	2.9	-999	3.3
	2003	3	17	76	2.4	2.8	2.8	1.6	1.9	2.2	2.2	2.5	-999	2.8
	2003	3	18	77	2.2	2.5	2.7	1.9	2.2	2.1	2.2	2.2	-999	2.5
	2003	3	19	78	1.7	2.1	2.2	2	2	1.5	1.8	1.5	-999	1.9
	2003	3	20	79	1.7	1.9	2	2.1	2	1	1.5	1.7	-999	1.7
	2003	3	21	80	1.7	2	2.2	1.9	2.1	1.4	1.2	2.1	-999	1.9
	2003	3	22	81	1.9	2.4	2.6	2	2.5	1.9	1.6	1.9	-999	2.1
	2003	3	23	82	1.9	2.3	2.5	2	2.4	1.8	1.6	1.6	-999	2.1
	2003	3	24	83	1.7	2	2.2	2	1.9	1.3	1.7	2	-999	1.9
	2003	3	25	84	2.2	2.5	2.7	2.1	2.3	2.3	2.2	2.4	-999	2.5
	2003	3	26	85	2.1	2.5	2.7	2.1	2.6	2	1.7	2.2	-999	2.3
	2003	3	27	86	1.8	2.2	2.2	1.5	1.5	1.3	1.4	2.4	-999	2.1
	2003	3	28	87	1.6	1.9	2	1.8	1.7	1.1	1.1	1.5	-999	1.8
	2003	3	29	88	1.8	2	2.1	1.5	1.6	1.3	1.1	2.3	-999	2.1
	2003	3	30	89	1.9	2.1	2.2	1.5	1.5	1.5	1.5	2.5	-999	2.2
	2003	3	31	90	2.1	2.4	2.6	2.3	2.6	1.8	1.5	2.9	-999	2.3
	2003	4	1	91	1.9	2.1	2.2	2.5	2	1	1.9	3.3	1.5	1.9
	2003	4	2	92	1.6	1.8	1.8	1.5	1	1.4	2.6	3.3	1.5	1.8
	2003	4	3	93	3.1	3.5	3.7	2.7	3.5	3.3	3.1	3.5	1.2	3.5
	2003	4	4	94	3.1	3.7	4	3.4	4.2	4	4.1	3.9	1.3	3.3
	2003	4	5	95	3.4	3.7	4.1	3.4	4	4	4.3	4.6	2.7	3.7
	2003	4	6	96	3.2	3.6	4	3.3	3.8	3.6	4.2	3.2	2.7	3.4
	2003	4	7	97	2.8	3.1	3.4	3.1	3.2	3	3.5	4.3	1.4	3
	2003	4	8	98	2.7	3.1	3.4	3.1	3.1	3	3.7	2.7	2.1	2.8
	2003	4	9	99	2.7	3	3.2	3.3	3	2.4	3.7	3.9	0.3	2.8
	2003	4	10	100	2.5	2.8	3	3.1	2.8	2.2	3	3.8	2.9	2.6
	2003	4	11	101	2.7	3.1	3.4	2.7	3.2	3.1	3.1	4.1	2.6	3
	2003	4	12	102	2.7	2.9	3.2	2.8	2.9	2.3	2.8	4.3	3.5	3
	2003	4	13	103	2.7	2.9	3.2	2.9	2.9	2.7	3.4	4.5	2.8	2.9
	2003	4	14	104	2.9	3.4	3.6	2.9	3.4	3.3	3.6	4.7	2.5	3.2
	2003	4	15	105	2.4	2.6	2.8	2.1	2	2.5	3	2.9	2.7	2.7
	2003	4	16	106	2.1	2.5	2.5	1.5	1.2	1.7	2.3	1.8	0.6	2.4
	2003	4	17	107	2.9	3.3	3.6	3.3	3.5	3.3	3.1	3.6	0.4	3.1
	2003	4	18	108	2.3	2.7	2.9	2.8	2.5	2.2	3	2.1	2	2.4
	2003	4	19	109	2.8	2.8	3	2.3	2	2.7	3.6	4.2	0.3	3.2
	2003	4	20	110	2.2	2.5	2.6	2.9	2.3	1.5	3	3.2	0.4	2.3
	2003	4	21	111	2	2.3	2.4	2.2	1.9	2	2.6	3.6	1.2	2.2
	2003	4	22	112	2.3	2.7	2.9	2.7	2.6	2.4	2.9	3.2	0.7	2.4
	2003	4	23	113	2	2.3	2.3	2.2	1.8	2	3.1	3.9	0.9	2.2
	2003	4	24	114	3.9	4.1	4.2	2.3	2.8	3.6	3.6	3.8	1.5	4.7
	2003	4	25	115	3.2	3.9	4.1	2.9	3.6	4.2	4.5	3.9	2.3	3.5
	2003	4	26	116	3.1	3.7	3.9	3.1	3.7	3.7	3.9	4.3	2.5	3.4
	2003	4	27	117	2.5	2.9	3.1	3	2.8	2.2	3.1	3.4	3.6	2.6
	2003	4	28	118	1.8	2.1	2.2	1.9	1.4	2	2.9	3.5	2.2	1.9
	2003	4	29	119	1.8	2	2.1	1.6	1	1.6	3	4.4	4.1	2.1
	2003	4	30	120	2.9	2.8	2.9	1.9	1.6	2.5	3.8	4.5	3.3	3.4
	2003	5	1	121	3.4	3.7	4.2	3.5	3.9	3.9	3.7	4.9	3.4	3.7
	2003	5	2	122	2.9	3.2	3.5	2.8	2.9	3.3	4	5.5	3.9	3.2
	2003	5	3	123	2.6	3	3.1	2.5	2.3	3	4.6	6	3.9	2.9
	2003	5	4	124	2.7	2.8	3	2.3	1.9	2.8	4.8	6	4	3
	2003	5	5	125	3.5	3.9	4.2	3.6	3.8	4	5.1	6.1	4	3.8
	2003	5	6	126	2.2	2.7	2.7	2.3	1.9	2.9	5.1	5.8	4.7	2.4
	2003	5	7	127	3.1	3.6	4	3.4	3.9	3.7	3.7	4.2	5.8	3.2
	2003	5	8	128	3	3.4	3.7	3.1	3.4	3.5	3.8	5.1	5.9	3.2
	2003	5	9	129	3.3	3.6	4	3.7	3.7	3	4.1	5.8	5.7	3.5
	2003	5	10	130	3.2	3.4	3.7	3.7	3.2	3	4.9	6.3	5.1	3.3
	2003	5	11	131	3.5	3.7	4.1	3.9	3.5	3.5	5.4	6.4	6.5	3.8
	2003	5	12	132	2.7	2.8	2.9	3.1	2.3	2.5	5.7	6.5	5.9	2.8
	2003	5	13	133	3.9	4.1	4.6	4.3	4.1	3.7	5.6	6.6	7.1	4.1
	2003	5	14	134	3.5	3.6	3.9	3	2.9	3.8	5.7	6.7	6	4
	2003	5	15	135	4	4.6	4.9	3.5	4.2	5.5	6.6	5.6	4.1	4.5
	2003	5	16	136	3.6	4.1	4.6	3.8	4	4.8	5.8	5.4	5.2	3.9
	2003	5	17	137	2.3	2.5	2.6	2.7	2	2.3	5.3	5.9	5.9	2.4
	2003	5	18	138	3.8	4.3	4.8	4.1	4.4	4.9	5.7	5.8	4.6	4
	2003	5	19	139	3.6	3.9	4.3	4	3.9	4.2	5.6	6.1	4.2	3.8
	2003	5	20	140	3.2	3.6	3.9	3.5	3.4	3.6	5.1	6.1	0.7	3.3
	2003	5	21	141	4	4.5	5	4.3	4.7	5	5.8	6.4	3.9	4.3
	2003	5	22	142	3.9	4.5	5.1	4.3	4.7	5.6	6	5.5	1.4	4.2
	2003	5	23	143	4.6	5.2	5.4	4.2	5.4	5.6	6.1	5.8	4.2	5.1
	2003	5	24	144	3.9	4.4	4.9	4.1	4.5	5.4	6	6.3	5.8	4.2
	2003	5	25	145	3.9	4.7	4.8	3.9	4.8	5.5	6.5	7.2	4.8	4.2
	2003	5	26	146	3.7	4.1	4.2	3.1	3.3	4.3	6	6.5	6.2	4.2
	2003	5	27	147	3.5	3.8	4.1	3.3	3.4	3.7	5.3	6.2	5.9	3.9
	2003	5	28	148	3	3.3	3.5	2.8	2.6	3.3	5.5	6	6.1	3.4
	2003	5	29	149	3.2	3.6	3.8	3.1	2.9	3.8	5.9	6.1	6	3.6
	2003	5	30	150	3.2	3.7	4	3.1	3	4.5	6.9	5.1	5.2	3.5
	2003	5	31	151	3.3	3.9	4.1	3.4	3.7	4	5.1	4.6	5.7	3.6
	2003	6	1	152	3.6	4.1	4.5	4	4.1	4.3	5.1	5.1	6.6	3.8
	2003	6	2	153	3.6	4.1	4.6	3.8	4.1	4.9	5.3	4.9	5.3	3.9
	2003	6	3	154	3.5	4.2	4.5	3.8	4.3	4.6	5.1	5.2	5	3.8
	2003	6	4	155	3.5	3.9	4.2	3.8	4	3.5	4.7	6	4.7	3.7
	2003	6	5	156	4	4.6	4.9	3.6	4.6	5.3	5.2	5.8	3.5	4.4
	2003	6	6	157	4.2	4.6	5	3.9	4.7	5.1	5.3	6.3	4.3	4.7
	2003	6	7	158	4.3	4.5	4.9	4	4.3	4.4	5.9	7	5.2	4.7
	2003	6	8	159	4.5	4.5	5.1	4.3	4.3	5	6.5	7.3	5.4	5
	2003	6	9	160	4.4	4.5	5.1	4.5	4.3	5.1	7.2	7.4	5.5	4.8
	2003	6	10	161	4.8	4.8	5.3	4.1	4.3	5.7	7.4	8	5.1	5.4
	2003	6	11	162	4.4	4.6	5.1	4.4	4.4	4.9	7.2	7.7	6.8	4.8
	2003	6	12	163	4.9	4.9	5.6	4.5	4.7	5.5	7.1	7	6.5	5.4
	2003	6	13	164	4.8	5	5.6	4.5	4.9	6.1	7.4	7.3	5.8	5.3
	2003	6	14	165	4.2	4.7	5.2	4.2	4.5	6.1	7.6	7.5	7.1	4.6
	2003	6	15	166	4.5	5.2	5.6	4.4	5.2	6.7	7.9	7.9	6.7	5
	2003	6	16	167	4.7	5.1	5.3	4	4.6	5.9	8.5	8.2	7.2	5.2
	2003	6	17	168	5.6	5.8	6.3	4.2	5.2	7.3	8.5	7.1	4.6	6.5
	2003	6	18	169	5.5	5.7	6.1	4.3	5.4	7	8.2	7.5	5.2	6.3
	2003	6	19	170	6.5	6.3	6.7	4.2	5.5	7.5	8	7.6	6.4	7.8
	2003	6	20	171	6.2	6.1	6.5	4.4	5.5	7.3	8.3	8.1	6.8	7.3
	2003	6	21	172	5.6	5.9	6.1	4.2	5.5	6.9	8.4	7.8	5.6	6.4
	2003	6	22	173	5.9	6.1	6.3	4.1	5.7	7.7	8.3	7.9	6.1	6.9
	2003	6	23	174	4.1	5.1	5.2	3.9	4.8	6.6	8.3	7.4	6.8	4.6
	2003	6	24	175	4.9	5.6	5.6	3.8	5.1	6.5	7.5	6.4	6.7	5.6
	2003	6	25	176	4.9	5.5	5.6	4	5.2	6.4	7.5	7.2	6.8	5.6
	2003	6	26	177	6.2	6.1	6.2	4.1	5.6	7	7.4	8.1	6.5	7.3
	2003	6	27	178	6	6.1	6.4	4.1	5.7	7.6	7.9	8	6.6	7.1
	2003	6	28	179	5	5.7	5.7	3.9	5.4	7	8.1	7.8	6.8	5.8
	2003	6	29	180	6	6.1	6.3	4.1	5.7	7.5	8.2	8	7.1	7
	2003	6	30	181	5.3	5.9	6.2	4.7	5.9	7.2	8.6	7.6	7.7	6
	2003	7	1	182	5.8	6	6.4	4.3	5.6	7.5	8	7.4	6.7	6.7
	2003	7	2	183	5.8	5.9	6.3	4.5	5.6	6.8	8.2	8	7.6	6.7
	2003	7	3	184	5.9	5.8	6.3	4.4	5.3	6.8	8.5	8.4	8.2	6.9
	2003	7	4	185	6.4	6.2	6.7	4.4	5.6	7.9	9.1	9	6.8	7.5
	2003	7	5	186	5.1	5.4	5.9	4.4	4.9	7.2	9.5	8.8	8	5.7
	2003	7	6	187	5.3	5.8	6.2	4.4	5.4	7.9	9.9	8.8	7.6	6.1
	2003	7	7	188	5.9	5.7	6.4	4.8	5.2	6.8	9.5	8.7	8.1	6.7
	2003	7	8	189	7.2	7.1	7.1	3.9	5.8	8.2	8.7	6.7	6.8	8.8
	2003	7	9	190	5.1	5.6	5.5	3.1	3.9	6.1	8.3	7.3	7.2	6.1
	2003	7	10	191	4.6	5.3	5.4	3.8	5.1	6.6	7.7	7.7	6.2	5.1
	2003	7	11	192	6.2	6.1	6.5	4.1	5.4	7.6	8.4	8	7.2	7.3
	2003	7	12	193	6.6	6.4	6.7	4.2	5.6	7.8	9	8.5	7.1	7.8
	2003	7	13	194	5.4	5.7	6	4.3	5.2	6.8	9.2	8.2	7.7	6.2
	2003	7	14	195	5.3	5.2	5.9	4.7	4.7	6.2	9.2	8.3	8.5	6
	2003	7	15	196	6.6	6.2	6.7	4.5	5.3	7.1	9.3	8.6	7	7.7
	2003	7	16	197	7.4	7	7.1	4.2	5.9	8.2	9.4	8.5	6.9	8.9
	2003	7	17	198	6.9	6.7	6.7	3.8	5.3	7.6	9	7.8	6.9	8.3
	2003	7	18	199	5.9	6.1	6.1	3.7	5.2	7.1	8.4	7.3	7.1	7
	2003	7	19	200	5.1	5.7	5.7	3.8	5.4	6.8	7.8	7.4	6.2	5.9
	2003	7	20	201	4.3	5.2	5.3	3.9	5.1	6.4	7.9	7.5	7.4	4.8
	2003	7	21	202	4.4	5.1	5.1	3.8	4.7	5.6	8.3	8	6.4	4.9
	2003	7	22	203	4.9	5.3	5.6	4	4.9	6.8	8.5	8.2	6.8	5.6
	2003	7	23	204	5.4	5.9	6	3.8	5.1	7.2	8.8	7.4	6.7	6.4
	2003	7	24	205	4.5	5.5	5.6	4	5.4	7.2	8.8	6.8	6.8	5
	2003	7	25	206	4.5	5.4	5.6	3.9	5	7	9	7.1	6.8	5.1
	2003	7	26	207	4.5	5.3	5.4	3.7	4.9	6.8	8.4	7.4	6.8	5.1
	2003	7	27	208	4.3	5.2	5.3	3.9	5	6.7	8.2	7.3	6.8	4.8
	2003	7	28	209	5.4	5.8	5.9	3.8	5.2	7	8.2	7.4	6.7	6.3
	2003	7	29	210	4.9	5.6	5.5	3.5	5	6.7	7.6	6.4	6.7	5.6
	2003	7	30	211	4.2	5.1	5.2	3.7	4.8	6.5	7.7	6.8	6.8	4.7
	2003	7	31	212	3.9	5	4.9	3.7	4.9	6.2	7.8	7.1	6.8	4.2
	2003	8	1	213	3.8	4.9	4.9	3.7	4.6	6.1	8	7.7	6.8	4.2
	2003	8	2	214	4.5	4.8	5.2	3.9	4.3	5.9	8.2	7.9	7.6	5.1
	2003	8	3	215	5.9	5.7	6.2	4.2	5.1	7.1	8.8	8.1	7.1	6.8
	2003	8	4	216	5.7	5.6	6	3.8	4.6	7.1	9.2	8.3	7	6.7
	2003	8	5	217	4.8	5.1	5.6	4	4.4	6.5	9.3	7.6	7.4	5.4
	2003	8	6	218	4.5	4.7	5.2	4.3	4.3	5.5	8.6	7.5	8	5
	2003	8	7	219	4.9	4.9	5.5	4.3	4.2	5.8	9	7.5	8.6	5.5
	2003	8	8	220	4.5	4.8	5.3	4.4	4.3	5.9	9.2	8	8.1	4.9
	2003	8	9	221	5	5.3	5.8	4.3	4.7	6.9	9.7	7.8	8.2	5.6
	2003	8	10	222	4.6	5.1	5.4	4	4.5	6.5	9.5	7.9	8	5.2
	2003	8	11	223	4.6	5.2	5.6	3.9	4.6	6.9	9.7	7.5	7.7	5.2
	2003	8	12	224	4.1	4.8	5.1	3.9	4.4	6.2	8.7	6.8	8	4.5
	2003	8	13	225	4.2	4.5	4.9	4.3	4	5.6	8.7	6.6	8.4	4.5
	2003	8	14	226	4.2	4.6	5.1	3.9	4.2	5.9	7.9	6.8	7.7	4.7
	2003	8	15	227	3.8	4.1	4.5	3.8	3.8	5.4	7.4	6.9	8	4.1
	2003	8	16	228	3.8	4	4.4	3.9	3.7	4.8	7.5	7.1	7	4.2
	2003	8	17	229	4.6	4.8	5.3	4.1	4.1	5.8	9	7	6.6	5.2
	2003	8	18	230	4.5	4.3	4.8	3.9	3.7	5.3	8.6	7.7	6.8	5.1
	2003	8	19	231	4.1	4.2	4.6	4.1	3.6	4.9	8.7	7.3	7	4.5
	2003	8	20	232	3.6	3.7	3.9	4.3	3	3.5	8.7	7.3	7.4	3.6
	2003	8	21	233	3.9	4.1	4.5	3.9	3.7	5.4	8.6	7.3	6.9	4.2
	2003	8	22	234	3.6	4	4.3	3.7	3.4	5	8.3	6.5	5.5	3.9
	2003	8	23	235	4.4	4.6	5	3.7	4	5.4	8.3	6.7	6.4	4.9
	2003	8	24	236	3.9	4.2	4.5	3.6	3.6	4.7	7.9	6.4	6.6	4.4
	2003	8	25	237	3.6	3.9	4.2	3.9	3.4	4.6	8.1	6.5	5.7	3.8
	2003	8	26	238	3.4	3.6	3.9	3.5	3.1	4.4	7.6	6.4	6.4	3.6
	2003	8	27	239	3.5	3.7	4	3.8	3.2	4.2	7.6	6.5	6.5	3.7
	2003	8	28	240	3.3	3.5	3.7	3.6	3	4	7.6	6.9	6.5	3.5
	2003	8	29	241	3.6	3.9	4.2	3.9	3.5	4.7	7.8	6.7	5.7	3.8
	2003	8	30	242	3.5	3.7	4	3.8	3.3	4.4	7.7	6.7	5.7	3.8
	2003	8	31	243	3.5	3.9	4.2	3.8	3.5	4.7	8	6.6	5.6	3.8
	2003	9	1	244	3.7	4.3	4.5	3.4	3.8	5.2	8.1	6.7	5	4.1
	2003	9	2	245	3.5	4.1	4.3	3.3	3.6	5.2	7.9	6.8	5.1	3.8
	2003	9	3	246	3.6	4.1	4.3	3.3	3.5	4.8	7.8	6.6	4.5	4
	2003	9	4	247	3.3	3.5	3.8	3.2	2.9	4.3	7.5	6.9	4.8	3.6
	2003	9	5	248	3.4	3.6	3.9	3.2	3	4.3	7.4	5.9	4.8	3.7
	2003	9	6	249	3.1	3.4	3.6	3.2	3	4	6.2	4.7	4.9	3.3
	2003	9	7	250	3	3.1	3.4	2.8	2.7	3.4	5.1	4.6	4.8	3.3
	2003	9	8	251	2.6	2.7	2.8	2.8	2.3	2.6	5	5	5	2.8
	2003	9	9	252	2.8	2.9	3.1	3.2	2.7	2.7	5	5.3	4.3	3
	2003	9	10	253	3	3.1	3.3	3.2	2.9	3.3	5.4	5.6	4.4	3.2
	2003	9	11	254	3.1	3.3	3.5	3.4	3	3.5	5.9	5.6	3.9	3.3
	2003	9	12	255	2.8	3.1	3.3	3.3	2.8	3.4	6.2	4.8	5.1	2.9
	2003	9	13	256	3	3.5	3.8	3	3.2	4.8	6.1	4.8	4.6	3.3
	2003	9	14	257	3.7	4.2	4.3	2.7	3.6	4.8	6	5.4	3.5	4.3
	2003	9	15	258	2.8	3.9	3.9	2.7	3.6	4.9	6.4	5.5	3.4	3.1
	2003	9	16	259	3.1	4.1	4	2.4	3.5	5	6	5.7	3.4	3.6
	2003	9	17	260	4.2	4.7	4.8	2.4	3.8	5.6	6.2	5	3.3	5.1
	2003	9	18	261	2.3	3.7	3.4	2.2	3.1	4.2	5.3	3.3	4	2.5
	2003	9	19	262	2.5	3.5	3.5	2.4	3.2	4.2	4.8	4.5	3.4	2.7
	2003	9	20	263	2.6	3.5	3.5	2.4	3.1	4.1	4.7	4.5	2.9	2.9
	2003	9	21	264	2.4	3.2	3.3	2.3	3	3.8	4.5	4.4	3	2.6
	2003	9	22	265	2.6	3.3	3.4	2.4	3	3.9	4.8	4.7	3.1	2.9
	2003	9	23	266	2.9	3.3	3.5	2.6	3	4	5.2	4.8	3.3	3.2
	2003	9	24	267	3	3	3.2	2.8	2.7	3.4	5.1	4.8	4.2	3.3
	2003	9	25	268	3	3.3	3.5	2.8	3	4.1	5.3	5	4.1	3.4
	2003	9	26	269	2.6	3.2	3.3	2.8	3	4.1	5.5	5	3.4	2.8
	2003	9	27	270	2.6	3.2	3.4	2.7	3	4.3	5.6	5	3.9	2.8
	2003	9	28	271	2.5	3.4	3.4	2.3	3.1	4.4	5.3	5	3.5	2.8
	2003	9	29	272	2.7	3.6	3.6	2.3	3.4	4.7	5.2	4.8	3.4	3
	2003	9	30	273	2.5	3.2	3.3	2.3	2.9	4	5	4.5	3.7	2.8
	2003	10	1	274	2.5	3.1	3.3	2.4	2.9	3.7	4.9	3.8	3.8	2.8
	2003	10	2	275	2.3	3	3.1	2.4	2.9	3.6	4.6	3.6	3.8	2.5
	2003	10	3	276	1.9	2.6	2.6	2	2.3	2.8	3.5	2.5	2.1	2.1
	2003	10	4	277	2.1	2.7	2.8	2.1	2.6	3	3.7	3.1	1.3	2.3
	2003	10	5	278	2	2.2	2.3	2	1.8	2.4	3.9	3.6	2.1	2.1
	2003	10	6	279	2.1	2.3	2.4	2.2	2	2.5	4.4	4.3	2.2	2.3
	2003	10	7	280	2.1	2.4	2.4	1.9	1.8	2.9	4.8	4.4	2	2.3
	2003	10	8	281	2.1	2.6	2.6	2.3	2.3	3.4	4.9	4.5	2.7	2.2
	2003	10	9	282	2.2	2.8	2.9	2.3	2.6	3.5	4.9	4.4	2	2.4
	2003	10	10	283	2.7	2.9	3.1	2.4	2.6	3.5	5.3	4.4	2	3.1
	2003	10	11	284	1.8	2.1	2.1	1.6	1.2	2.4	5.2	4.2	2.8	2
	2003	10	12	285	1.5	1.8	1.8	1.3	0.7	1.9	4.7	3.7	2.8	1.7
	2003	10	13	286	2	2.3	2.4	2.1	2	2.8	4.5	3.7	2.8	2.2
	2003	10	14	287	2	2.2	2.2	2.1	1.9	2.4	4.3	3.8	2.9	2.1
	2003	10	15	288	2.2	2.2	2.3	1.8	1.6	2.5	4.7	4.1	2.9	2.5
	2003	10	16	289	2.7	2.7	3	2.1	2.2	3.6	4.9	3.5	2.7	3.1
	2003	10	17	290	3.1	3.7	3.8	1.7	2.8	4.4	5.1	2.9	2.2	3.7
	2003	10	18	291	2.1	2.9	3	1.7	2.5	3.8	4.5	2.9	2.4	2.3
	2003	10	19	292	2.2	2.8	2.9	1.7	2.3	3.4	4.2	3.1	2.4	2.6
	2003	10	20	293	1.2	1.3	1.3	1.1	0.4	1.1	4	3.2	3	1.3
	2003	10	21	294	1.7	2.1	2.1	1.9	1.9	2.5	3.9	3.3	2.3	1.8
	2003	10	22	295	1.7	2.3	2.3	1.8	2.1	3.2	4.2	3.3	2	1.9
	2003	10	23	296	1.8	2.6	2.6	1.7	2.5	3.6	4.2	3.6	1.8	1.9
	2003	10	24	297	1.7	2.4	2.4	1.6	2.1	3	3.9	3.2	1.9	1.9
	2003	10	25	298	1.6	2.3	2.3	1.7	2.1	3.1	4	3.3	1.9	1.8
	2003	10	26	299	1.9	2.4	2.5	1.5	1.7	2.8	4	3	1.9	2.2
	2003	10	27	300	2.2	2.7	2.8	1.4	1.8	3	3.7	2.4	1.8	2.6
	2003	10	28	301	1.5	2.1	2.1	1.3	1.7	2.3	2.9	2.4	1.8	1.6
	2003	10	29	302	1.2	1.9	1.8	1.1	1.1	1.6	2.3	1.8	1.3	1.4
	2003	10	30	303	0.7	0.8	0.8	0.9	0.4	0.3	1.5	1.7	1.5	0.8
	2003	10	31	304	1.2	1.6	1.6	1.1	1.4	1.6	1.5	1.5	1.3	1.3
	2003	11	1	305	2	2.5	2.6	1.4	2	3	3.8	2	-999	2.3
	2003	11	2	306	1.8	2.3	2.4	1.5	1.9	3	3.8	2.2	-999	2.1
	2003	11	3	307	1.8	1.8	1.9	0.9	0.2	1.3	3.5	2.4	-999	2.2
	2003	11	4	308	1.8	2.2	2.3	1.4	2	2.7	3.5	2.5	-999	2.1
	2003	11	5	309	1	1.2	1.2	1	0.5	1.2	3.3	2.5	-999	1
	2003	11	6	310	1.2	1.6	1.6	1.2	1	1.8	3.2	2.4	-999	1.3
	2003	11	7	311	1.4	1.6	1.6	1.1	0.8	1.5	3.4	2.3	-999	1.6
	2003	11	8	312	1	1.1	1.1	0.8	0.1	0.9	3.6	2.4	-999	1.1
	2003	11	9	313	1.2	1.3	1.3	1.3	1	1.3	3.2	1.9	-999	1.3
	2003	11	10	314	1.1	1.5	1.5	1.1	0.8	1.5	3.1	1.2	-999	1.2
	2003	11	11	315	1.4	1.5	1.6	1	0.6	1.4	3.2	1.2	-999	1.6
	2003	11	12	316	1.6	2.1	2.2	1	1	2.2	3.2	1.4	-999	1.9
	2003	11	13	317	1	1.5	1.5	1.1	0.9	1.7	3.1	1.6	-999	1.1
	2003	11	14	318	1	1.4	1.4	1.1	1.1	1.4	2.5	1	-999	1
	2003	11	15	319	0.9	1.2	1.3	0.8	-0.1	0.8	2.9	1.4	-999	1
	2003	11	16	320	0.8	1.2	1.2	0.8	0	1	3.3	1.2	-999	0.8
	2003	11	17	321	1	1.5	1.5	1	0.7	1.6	3.3	1.1	-999	1.1
	2003	11	18	322	1	1.6	1.6	1.1	1.5	2.4	3.4	1.3	-999	1.1
	2003	11	19	323	0.9	1.2	1.1	1.1	0.9	1.2	3	1.2	-999	0.9
	2003	11	20	324	0.9	1.2	1.2	0.8	0	0.6	3	1.5	-999	1
	2003	11	21	325	0.9	1.3	1.3	0.8	-0.1	0.5	2.9	1.7	-999	1
	2003	11	22	326	1.2	1.7	1.7	0.9	0.9	1.6	3	1.5	-999	1.3
	2003	11	23	327	1.3	2.1	2.1	0.8	1.8	2.8	2.8	1.7	-999	1.5
	2003	11	24	328	1.2	2.1	2	0.9	0.5	1.7	3.1	1.9	-999	1.4
	2003	11	25	329	1.1	1.9	1.9	0.9	0	1.1	3.1	1.8	-999	1.3
	2003	11	26	330	1.2	2	2	0.8	1.1	2.2	2.9	1.3	-999	1.4
	2003	11	27	331	1	1.9	1.9	0.8	1.5	2.6	3.1	1.6	-999	1.2
	2003	11	28	332	0.9	1.3	1.3	0.9	1.1	1.2	2.3	1.5	-999	1
	2003	11	29	333	1.2	1.8	1.9	0.7	1.1	1.7	1.8	0.9	-999	1.5
	2003	11	30	334	1	1.5	1.5	0.7	1.1	1.6	1.7	1.7	-999	1.1
	2003	12	1	335	1.4	1.8	1.9	0.6	1.4	1.7	1.6	1.4	-999	1.7
	2003	12	2	336	1.6	2	2.1	0.7	1.3	2.1	2.3	1.2	-999	1.9
	2003	12	3	337	1.3	1.9	2	0.6	1.6	2.2	2.2	1.1	-999	1.6
	2003	12	4	338	1.1	1.5	1.6	0.8	0.7	1.2	2.3	0.5	-999	1.3
	2003	12	5	339	1	1.1	1.2	0.7	0.3	0.6	2.2	0.6	-999	1.2
	2003	12	6	340	1.5	1.6	1.8	0.8	1.1	1.5	2.1	0.7	-999	1.8
	2003	12	7	341	0.8	1.1	1.1	0.7	0.1	0.5	2.1	0.8	-999	0.9
	2003	12	8	342	0.8	1.3	1.3	0.7	0.8	1.3	2.2	0.5	-999	0.9
	2003	12	9	343	0.7	1.2	1.2	0.8	1.3	1.4	2.2	0.4	-999	0.8
	2003	12	10	344	0.8	1.1	1.1	0.8	0.4	0.8	2.6	0.9	-999	0.8
	2003	12	11	345	0.8	1.2	1.2	0.8	1	1.1	2.3	0.9	-999	0.8
	2003	12	12	346	1	1.3	1.3	1	1.4	1.6	3	1	-999	1.1
	2003	12	13	347	1	1.4	1.4	0.9	1.1	1.4	3	1.2	-999	1.1
	2003	12	14	348	1.1	1.4	1.4	0.9	1	1.3	2.8	1.2	-999	1.3
	2003	12	15	349	0.8	1.1	1.1	0.8	0.9	1.4	2.7	1.3	-999	0.9
	2003	12	16	350	0.9	1.3	1.3	0.9	1.2	1.5	3	1.6	-999	1
	2003	12	17	351	1.8	2.4	2.5	0.7	1.3	2.7	3.4	1.3	-999	2.2
	2003	12	18	352	1.9	2.1	2.2	0.7	0.5	1.5	2.3	1.5	-999	2.3
	2003	12	19	353	2.4	2.6	2.6	0.7	0.3	1.1	1.8	1.4	-999	3
	2003	12	20	354	1	1.7	1.7	0.6	0.7	1.3	1.9	1.1	-999	1.2
	2003	12	21	355	0.9	1.7	1.7	0.6	1	1.7	1.9	0.9	-999	1.1
	2003	12	22	356	1	1.7	1.7	0.6	0.6	1.2	1.8	0.6	-999	1.2
	2003	12	23	357	0.9	1.7	1.6	0.8	-0.1	0.6	1.8	0.8	-999	1
	2003	12	24	358	0.8	1.6	1.6	0.6	0.9	1.6	2.2	0.8	-999	0.9
	2003	12	25	359	0.7	1.5	1.5	0.6	1	1.6	2.1	0.5	-999	0.8
	2003	12	26	360	0.8	1.6	1.6	0.6	1.2	1.9	2.3	0.8	-999	0.9
	2003	12	27	361	0.7	1.5	1.5	0.5	1.2	1.6	1.7	1.1	-999	0.9
	2003	12	28	362	0.7	1.4	1.4	0.6	1	1.3	1.6	1.2	-999	0.9
	2003	12	29	363	1	1.5	1.6	0.6	0.7	1	1.2	0.7	-999	1.2
	2003	12	30	364	0.8	1.5	1.4	0.5	0.9	1.1	1.2	0.8	-999	0.9
	2003	12	31	365	0.7	1.3	1.3	0.5	0.9	0.9	1	0.7	-999	0.8
	2004	1	1	1	0.5	0.9	0.9	0.4	2.4	1.1	0.9	1.2	-999	0.6
	2004	1	2	2	0.6	0.8	0.9	0.6	2.1	1	1	1.3	-999	0.7
	2004	1	3	3	1	1.1	1.2	0.6	1.3	1.1	1	0.8	-999	1.1
	2004	1	4	4	0.6	0.9	1	0.5	1.7	0.9	0.9	0.1	-999	0.7
	2004	1	5	5	0.7	0.9	1	0.6	1.7	0.7	0.9	0.3	-999	0.7
	2004	1	6	6	0.7	0.8	0.9	0.9	1.9	0.6	1.4	1.3	-999	0.8
	2004	1	8	8	0.9	1	1.2	0.5	2.2	1.1	0.9	1.4	-999	1
	2004	1	9	9	0.8	0.8	0.9	0.6	1.7	0.3	0.6	1.4	-999	0.9
	2004	1	10	10	1.3	1.3	1.5	0.6	2.2	2	1.4	1.7	-999	1.6
	2004	1	11	11	0.9	1.2	1.3	0.5	1.9	0.8	0.7	0.2	-999	1
	2004	1	13	13	0.6	0.9	0.9	0.6	1.1	0.4	0.8	0.4	-999	0.7
	2004	1	14	14	0.8	1.1	1.2	0.7	1.8	0.9	0.9	0.4	-999	0.9
	2004	1	15	15	1.1	1.4	1.5	0.7	1.6	1.2	1	0.5	-999	1.4
	2004	1	16	16	1.6	1.7	1.8	0.8	1.7	1.9	1.8	1.5	-999	1.9
	2004	1	17	17	1.4	1.5	1.8	0.8	2.9	2.2	1.4	1.5	-999	1.7
	2004	1	18	18	0.9	1.2	1.4	0.7	2.3	1.1	0.7	0.8	-999	1.1
	2004	1	19	19	0.8	1.1	1.1	0.6	0.8	0.5	0.8	1.3	-999	1
	2004	1	20	20	0.8	0.9	1	0.8	1.9	0.4	0.6	1.3	-999	0.9
	2004	1	21	21	0.8	1	1.1	1	2.2	0.4	0.8	0.8	-999	0.9
	2004	1	22	22	1	1.3	1.5	1	2.5	1	1	0.4	-999	1.2
	2004	1	23	23	1.3	1.6	1.7	1.2	3	1.7	1.8	1.8	-999	1.5
	2004	1	25	25	1	1.3	1.4	1	2.3	0.9	1.1	1.1	-999	1.1
	2004	1	26	26	1	1.3	1.4	1.1	2.4	0.9	1	1.1	-999	1.1
	2004	1	27	27	0.9	1.2	1.3	1	2.2	0.6	0.8	1.1	-999	1
	2004	1	28	28	0.7	1	1	0.9	1.7	-0.1	0.4	0.5	-999	0.8
	2004	1	29	29	1	1.3	1.4	0.9	2.3	0.8	0.7	1.2	-999	1.1
	2004	1	30	30	1.1	1.3	1.5	0.9	2.1	0.6	0.5	0.9	-999	1.3
	2004	2	2	33	1.2	1.5	1.5	1	1.1	1.3	1.9	2.7	-999	1.4
	2004	2	5	36	1	1.3	1.3	1	1.4	0.6	1	1.6	-999	1.1
	2004	2	10	41	1.3	1.6	1.6	1.1	1.7	1.1	1.2	1.7	-999	1.5
	2004	2	11	42	1.3	1.3	1.4	1.2	1.8	0.6	0.8	2.1	-999	1.5
	2004	2	12	43	1.9	1.8	2.1	1.4	2.6	1.7	1.2	2.3	-999	2.2
	2004	2	13	44	1.8	2	2.1	1.5	2.8	2.1	1.5	2.6	-999	2
	2004	2	14	45	1.4	1.7	1.7	1.2	1.4	1.2	1.7	2.8	-999	1.5
	2004	2	15	46	1.3	1.5	1.5	1	0.8	0.8	1.7	2.9	-999	1.5
	2004	2	19	50	1.8	2	2	1.4	1.9	1.5	1.8	2.9	-999	2.1
	2004	2	21	52	2.5	3	3.2	2.3	3.8	3.6	3.7	3.1	-999	2.8
	2004	2	22	53	1.5	1.9	1.9	1.5	1.6	1.5	2.4	2.4	-999	1.7
	2004	2	23	54	2	2.3	2.5	2	3.3	2	1.9	2.4	-999	2.1
	2004	2	24	55	1.9	2.2	2.4	2.1	2.8	2.4	2.4	2.4	-999	2
	2004	2	25	56	1.8	2.3	2.5	2.1	3.2	2.5	1.8	1.7	-999	2
	2004	2	26	57	1.9	2.3	2.5	2.1	3	2.6	2.2	1.8	-999	2
	2004	2	27	58	2	2.4	2.6	1.9	3.1	2.1	1.6	0.8	-999	2.2
	2004	2	29	60	3.3	3.7	4.1	2.3	4.5	4.2	2.8	2	-999	3.9
	2004	3	1	60	1.8	1.9	2	1.4	2	1.3	1.1	2.9	-999	2.1
	2004	3	2	61	2.2	2.5	2.6	1.9	2.9	2.1	1.9	3.2	-999	2.5
	2004	3	3	62	2.9	2.9	3.1	2.1	3.4	2.6	2.1	3.5	-999	3.4
	2004	3	4	63	2.7	2.6	2.7	1.6	2.2	2.3	2.1	3.8	-999	3.2
	2004	3	5	64	2.3	3	3.1	2.3	4.3	3.9	2.7	4	-999	2.6
	2004	3	6	65	3.4	3.4	3.7	2.3	4.2	4.2	2.8	4.2	-999	4
	2004	3	7	66	2.5	2.8	2.9	2.1	3.4	2.9	2.4	4.3	-999	2.9
	2004	3	8	67	5	3.9	4.3	2.4	4.6	4.3	2.6	4.6	-999	6.1
	2004	3	9	68	3.8	3.4	3.7	2.4	4.2	3.6	2.2	4.1	-999	4.5
	2004	3	10	69	2.4	2.8	3	2.4	3.7	2.3	1.8	2.9	-999	2.7
	2004	3	11	70	2.5	2.6	2.9	2.3	3.2	2.1	1.6	3.2	-999	2.8
	2004	3	12	71	2.2	2.5	2.7	2.2	3.1	2.2	1.6	3.4	-999	2.5
	2004	3	13	72	2	2.4	2.5	1.9	2.5	2.1	1.9	3	-999	2.2
	2004	3	14	73	2.1	2.4	2.6	2	2.7	2.3	1.8	3.5	-999	2.3
	2004	3	15	74	2.3	2.4	2.5	1.8	2.1	2.1	1.9	3.6	-999	2.6
	2004	3	16	75	2.1	2.3	2.4	2	2.2	1.7	2.1	3.6	-999	2.4
	2004	3	17	76	2.2	2.6	2.7	1.8	2.4	2.2	2	3.2	-999	2.5
	2004	3	18	77	2.8	2.8	3.3	2.3	3	2.9	2	3	-999	3.3
	2004	3	19	78	3.1	3.2	3.7	2.6	3.7	3.5	2.2	3.2	-999	3.6
	2004	3	20	79	3.1	3.1	3.6	2.7	3.6	3.5	2.6	3.7	-999	3.5
	2004	3	21	80	3.1	3.2	3.7	2.9	3.7	3.8	3.1	4.1	-999	3.5
	2004	3	22	81	3.3	3.5	3.9	2.9	3.9	3.8	3.1	4	-999	3.8
	2004	3	23	82	3.7	3.7	4.5	2.8	4	4.4	3	3.3	-999	4.3
	2004	3	24	83	2.7	3.1	3.6	2.8	3.7	3.4	2.5	2.2	-999	2.9
	2004	3	25	84	2.7	2.8	3.2	2.6	3.3	2.8	2.1	3.9	-999	3
	2004	3	26	85	2.6	2.8	3.1	2.7	3.2	2.5	2	4.1	-999	2.9
	2004	3	27	86	2.5	2.8	3	3	3.1	2.1	2.5	3.7	-999	2.7
	2004	3	28	87	2.4	2.8	3.1	2.5	3.1	2.6	2.1	2.7	-999	2.7
	2004	3	29	88	2.9	3.1	3.5	2.8	3.5	3.1	2.4	4.1	-999	3.3
	2004	3	30	89	2.7	2.6	2.9	2.4	3	2.1	1.3	4	-999	3.1
	2004	3	31	90	4.2	3.3	3.9	2.8	3.6	3.3	2.1	4.9	-999	5.1
	2004	4	1	91	3.5	3.1	3.5	2.8	3.4	3	2.5	5.1	2.6	4
	2004	4	2	92	4	3.5	4	3	3.8	3.5	2.8	3.6	2.6	4.6
	2004	4	3	93	3.7	3.3	3.8	2.7	3.4	3.4	3	5.3	2.6	4.4
	2004	4	4	94	3.1	3.2	3.6	3	3.5	3.3	3	5.2	2.7	3.4
	2004	4	5	95	2.9	3.2	3.5	2.9	3.6	2.9	2.5	4.2	2.6	3.2
	2004	4	6	96	3	3.3	3.7	2.9	3.7	3.7	2.8	4.4	3.2	3.3
	2004	4	7	97	3.5	3.8	4.2	3	4.2	4.1	3.1	4.4	3	4
	2004	4	8	98	2.9	3.3	3.5	3.1	3.7	2.8	3.1	4.3	4	3.1
	2004	4	9	99	3.1	3.6	3.9	3.3	3.9	3.3	3.8	2.6	4.7	3.3
	2004	4	10	100	2.8	3.4	3.5	2.7	3.5	3.1	2.8	3.2	4.9	3.1
	2004	4	11	101	2.9	3.5	3.6	2.9	3.7	3.3	3.2	4.3	5.6	3.1
	2004	4	12	102	3.4	3.6	3.9	2.9	3.9	3.5	2.8	4.9	5.5	3.9
	2004	4	13	103	3.3	3.8	4.2	3.2	4.1	4.1	3.2	3.5	5.6	3.7
	2004	4	14	104	4.3	4.1	4.6	3.1	4.2	4.1	3	4.8	3.6	5
	2004	4	15	105	4	3.8	4.4	3.3	3.8	4	3.7	5.1	4.8	4.6
	2004	4	16	106	3.6	3.8	4.2	3.7	4	3.5	4.4	5.2	6.1	3.9
	2004	4	17	107	3.8	4.1	4.4	3.7	4.5	4	4.1	6	4.1	4.2
	2004	4	19	109	4	4.1	4.4	3.7	4.3	3.6	4.1	6.4	2.7	4.5
	2004	4	20	110	3.6	3.8	4.1	3.6	3.9	3.7	4.4	6.5	2.9	3.9
	2004	4	21	111	3.3	3.7	4	3.5	4	3.6	4.2	5.6	6	3.5
	2004	4	22	112	3.2	3.9	4.2	3.4	4.1	4.4	4.8	4.8	3.2	3.5
	2004	4	23	113	3.7	4	4.6	3.5	4.2	4.9	4.4	5.1	3.8	4.1
	2004	4	24	114	3.8	4.2	4.7	3.6	4.5	5.4	4.8	6.2	2.1	4.2
	2004	4	25	115	4.2	4.2	4.6	3.2	4.2	4.5	3.9	6	1.5	4.9
	2004	4	26	116	3.5	3.7	3.8	2.6	3	3.7	4	5.8	3	4
	2004	4	27	117	4.3	4.5	5	3.4	4.5	5.3	4.9	5.9	3	5
	2004	4	28	118	4	4.2	4.6	3.4	4.3	5	4.3	6.3	5.4	4.6
	2004	4	29	119	4.5	4.5	4.9	3.5	4.5	5.3	4.7	6.7	4.7	5.2
	2004	4	30	120	4.6	4.6	5	3.5	4.6	5.6	5.3	7.5	2.5	5.4
	2004	5	1	121	4.7	4.4	5.1	3.7	4.5	5.5	5.2	7.4	1.9	5.4
	2004	5	2	122	5.6	5	5.8	3.7	4.8	6.2	5.4	7	4.1	6.7
	2004	5	3	123	4.9	4.8	5.3	3.5	4.7	5.6	4.9	6.3	2.3	5.7
	2004	5	4	124	4.9	4.8	5.1	3.3	4.3	5	4.8	6.2	1.9	5.8
	2004	5	5	125	4.5	4.6	4.9	3.3	4.3	5.1	4.8	6.2	0.3	5.2
	2004	5	6	126	4.1	4.5	4.8	3.6	4.6	5	5.2	6.5	3	4.6
	2004	5	7	127	4.4	4.3	4.9	3.6	4.2	5.3	5.2	7.3	2	5
	2004	5	8	128	5.2	4.4	4.9	3.4	4	4.6	4.9	7.8	4.9	6.2
	2004	5	9	129	3.8	4.2	4.4	3.6	4.2	4.5	5.9	7.9	6.2	4.1
	2004	5	10	130	3.8	4.2	4.3	3.6	4.1	4.3	5.9	8.2	8.7	4.1
	2004	5	12	132	4.3	4.2	4.4	3.5	4	4.1	5.1	8	8.3	4.8
	2004	5	13	133	5.5	4.4	5	3.7	4	5.1	5.6	8.3	5.7	6.5
	2004	5	14	134	4.2	4.1	4.6	3.9	3.9	4.4	6.1	7.9	9.3	4.7
	2004	5	15	135	4.2	4.2	4.6	3.6	4	4.6	5.2	8.1	5.1	4.8
	2004	5	16	136	4	4.1	4.5	3.6	4	4.7	5.5	8.3	3.2	4.5
	2004	5	17	137	3.8	4.1	4.4	3.7	3.9	4.7	5.8	8.2	5.7	4.2
	2004	5	18	138	4.2	4.5	4.8	3.7	4.3	5.1	5.9	8	2.1	4.7
	2004	5	19	139	4.2	4.7	4.8	3.5	4.4	5.3	6.2	8	4.1	4.8
	2004	5	20	140	4	4.6	4.7	3.5	4.3	5.3	6.6	7.9	0.5	4.5
	2004	5	21	141	4.6	5.2	5.5	3.9	5	6.6	7.9	7.3	4.1	5.2
	2004	5	22	142	4.6	4.9	5.2	3.6	4.3	5.9	7.2	7.8	5.3	5.3
	2004	5	23	143	4.7	4.8	5.1	3.3	4.2	5.4	5.6	7	5.7	5.5
	2004	5	24	144	5.7	5.2	5.5	3.5	4.5	5.7	5.7	7.9	6.7	6.8
	2004	5	25	145	4.7	4.9	5.1	3.6	4.4	5.5	6.4	7.9	7.5	5.4
	2004	5	26	146	4.3	4.6	4.8	3.5	4.4	5.3	5.8	8	8.1	4.8
	2004	5	27	147	4.4	4.7	4.9	3.6	4.5	5.4	6.1	8.6	8.2	5
	2004	5	28	148	5.7	5.2	5.4	3.5	4.4	5.8	6.5	9.2	9.5	6.8
	2004	5	29	149	4.6	4.8	5	3.4	4.3	5.6	6.4	8.8	6.8	5.4
	2004	5	30	150	4.7	4.8	5	3.4	4.3	5.6	6.2	8.4	5.4	5.5
	2004	5	31	151	4.8	4.8	5.2	3.8	4.4	5.9	6.9	8.6	6.1	5.5
	2004	6	1	152	4.6	4.8	5.1	3.7	4.3	6	7.4	9.2	6	5.2
	2004	6	2	153	4.1	4.5	4.7	3.5	4.1	5.3	6.4	7.7	7.2	4.6
	2004	6	3	154	4	4.4	4.5	3.5	4.1	4.7	6	8.3	7.7	4.4
	2004	6	4	155	4.2	4.5	4.6	3.5	4.1	4.8	5.9	7.8	6	4.7
	2004	6	5	156	5.5	5	5.3	3.3	4.1	5.6	6.2	8.4	6.7	6.5
	2004	6	6	157	3.9	4.4	4.5	3.3	4	5.1	6	8.7	5.2	4.4
	2004	6	7	158	3.9	4.4	4.5	3.5	4	5	6.5	9	7.1	4.4
	2004	6	8	159	4.1	4.7	4.8	3.4	4.1	5.5	7	8.7	7.4	4.7
	2004	6	9	160	4.8	4.9	4.9	3.3	4	5.4	6.8	8.6	7.3	5.6
	2004	6	10	161	5.9	5.6	5.7	3.5	4.3	6	7.5	8.5	3.6	7.1
	2004	6	11	162	6.3	5.7	5.8	3.4	4.3	6.3	7.7	8.9	4.9	7.7
	2004	6	12	163	5	5.2	5.3	3.5	4.3	5.8	7.4	8.1	6.1	5.9
	2004	6	13	164	4.3	4.8	4.8	3.4	3.9	5.2	7.5	8.2	5.8	5
	2004	6	14	165	4.4	4.9	4.9	3.6	4.1	5.5	7.9	8.5	6.4	5
	2004	6	15	166	5	5.2	5.3	3.4	4.1	5.7	7.9	8.4	7.3	5.9
	2004	6	16	167	4.9	5.2	5.3	3.6	4.4	5.7	7.5	7.8	7.7	5.7
	2004	6	17	168	4.4	5	5.1	3.5	4.2	5.8	7.6	7.2	8	5.1
	2004	6	18	169	5.7	5.6	5.7	3.5	4.4	6.3	7.5	7.9	8.7	6.8
	2004	6	19	170	6.1	5.7	5.9	3.4	4.2	6.4	7.7	8.1	5.4	7.4
	2004	6	20	171	6	5.6	5.8	3.3	4.1	6.4	7.6	8.4	7.6	7.3
	2004	6	21	172	7	6.1	6.1	3.3	4.1	6.5	7.9	8.8	7.4	8.7
	2004	6	22	173	5.6	5.2	5.4	3.1	3.6	5.9	8	9	7.7	6.7
	2004	6	23	174	3.8	4.5	4.5	3.3	3.6	5.3	8.6	9	8.1	4.2
	2004	6	24	175	5.5	5.3	5.5	3.3	4	6.2	8.2	9.3	8.9	6.5
	2004	6	25	176	7.2	5.8	5.8	3.1	3.9	6	7.5	9.6	8.5	8.8
	2004	6	26	177	5.4	5.4	5.4	3.2	3.8	6	8.8	9	8.3	6.4
	2004	6	27	178	4.8	5	5	3.3	4.1	5.5	6.7	8.4	8.4	5.6
	2004	6	28	179	4.2	4.8	4.8	3.3	4	5.5	7.3	8.3	9.1	4.8
	2004	6	29	180	5.4	5.7	5.7	3.7	4.5	6.3	9	7.5	8.9	6.3
	2004	6	30	181	5.4	5.6	5.6	3.5	4.2	6.2	9.4	7.9	8.2	6.3
	2004	7	1	182	5.5	5.8	5.8	3.4	4.1	6.5	9.6	7.4	8.7	6.6
	2004	7	2	183	6.7	6.1	6.1	3.3	4	6.5	8.6	8.5	8.5	8.2
	2004	7	3	184	6.8	6.3	6.2	3.3	4.1	6.8	8.8	8	8.5	8.3
	2004	7	4	185	6.2	5.8	5.8	3.1	3.8	6.4	8.4	8.4	8.6	7.5
	2004	7	5	186	6.2	5.9	5.8	3.2	3.9	6.1	8.1	7.9	8.5	7.6
	2004	7	6	187	4.9	5	5	2.8	3.3	5	6.8	7.2	8.8	5.9
	2004	7	7	188	3.8	4.5	4.5	3	3.5	4.8	6.8	7.2	9.3	4.3
	2004	7	8	189	5.1	5.1	5.2	3	3.6	5.6	7.3	7.5	8.8	6.1
	2004	7	9	190	6.4	5.8	5.9	3.1	3.7	6	7.7	7.5	6.4	7.8
	2004	7	10	191	5.8	5.2	5.5	3.1	3.6	5.9	7.9	8.3	9	7
	2004	7	11	192	5.3	5.2	5.3	3.1	3.7	5.7	7.7	8.1	9.3	6.3
	2004	7	12	193	5.3	5.3	5.4	3.2	3.8	6	7.9	7.7	8.2	6.4
	2004	7	13	194	5	5.1	5.3	3.2	3.9	5.9	7.8	7.7	8.9	5.9
	2004	7	14	195	5.3	5.2	5.4	3.2	3.8	5.9	7.5	7.8	8.8	6.3
	2004	7	16	197	4	4.5	4.5	3.1	3.4	4.7	7.7	7.4	10.1	4.5
	2004	7	17	198	4.2	4.7	4.7	3.3	3.6	4.9	8.2	7.2	9.5	4.8
	2004	7	18	199	4.2	4.5	4.5	2.9	3.2	4.6	6.9	7.7	9.2	5
	2004	7	19	200	4.8	4.9	4.9	3	3.4	5.2	7.2	7.8	9.4	5.7
	2004	7	20	201	4.9	5.1	5.2	3.1	3.7	5.6	7.6	7.2	9.4	5.9
	2004	7	21	202	4.7	4.9	4.9	2.8	3.2	5.1	7.7	7.7	9.4	5.6
	2004	7	22	203	4.3	4.8	4.8	3	3.4	5.3	7.7	7.3	9	5.1
	2004	7	23	204	4.6	4.8	4.8	2.6	2.8	4.9	7.6	7.3	9.4	5.6
	2004	7	24	205	4.5	4.8	4.8	2.8	3.1	5.2	7.4	7.1	8.9	5.3
	2004	7	25	206	4	4.5	4.4	2.5	2.5	4.6	7.8	7.1	9.2	4.7
	2004	7	26	207	5	5.1	5.2	2.8	3.2	5.5	8.1	6.9	9.2	6
	2004	7	28	209	4	4.6	4.6	2.8	3.3	5.2	7.4	7.1	9.9	4.6
	2004	7	29	210	3.9	4.3	4.3	2.1	1.8	4.1	8.2	6.6	9.5	4.6
	2004	7	31	212	4.6	4.8	4.8	2.6	2.9	4.9	7	6.2	9.3	5.5
	2004	8	1	213	4.5	4.7	4.7	2.6	2.9	4.7	6.8	6.4	9.8	5.3
	2004	8	2	214	3.6	4.1	4.1	2.4	2.2	4.3	7.4	7.1	9.6	4.2
	2004	8	3	215	3.3	3.5	3.7	2.7	2.5	4.6	7.3	7.3	10.8	3.7
	2004	8	4	216	3.1	4	3.9	2.6	2.7	4.5	6.6	5.8	9.6	3.5
	2004	8	5	217	3.3	3.9	4.1	2.6	2.7	4.6	6.6	4.8	9.6	3.8
	2004	8	6	218	4.5	4.6	4.7	2.4	2.6	4.4	6.4	4.7	8.7	5.4
	2004	8	7	219	4.1	4.1	4.1	1.5	0.7	2.8	6.4	5.4	9.2	5.2
	2004	8	8	220	4.3	4.1	4.4	2.5	2.6	4.5	6.1	6.2	10	5.2
	2004	8	9	221	4.1	4.1	4.3	2.5	2.6	4.4	6.2	6.4	9.3	4.9
	2004	8	10	222	4.6	4.6	4.7	2.6	2.9	4.5	6.3	6.1	8.9	5.5
	2004	8	11	223	3.4	4.1	4	2.5	2.6	4	6.6	6.1	9.1	4
	2004	8	12	224	2.8	3.8	3.6	2.4	2.5	3.9	6.2	6.3	10.2	3.2
	2004	8	13	225	3.4	4	3.9	2.2	2	3.7	6.3	6.1	9.1	4
	2004	8	14	226	3	3.6	3.6	2.2	2	3.8	6.4	6.3	9.2	3.5
	2004	8	15	227	3	3.6	3.6	2.3	2.1	4	6.7	6.2	9.5	3.5
	2004	8	16	228	3.1	3.5	3.6	2	1.6	3.5	6.8	6.1	8.9	3.6
	2004	8	17	229	3.1	3.4	3.5	1.8	1.2	3.2	6.7	5.8	8.9	3.7
	2004	8	18	230	3.2	3.7	3.8	2.4	2.3	4.1	6.6	6.1	9	3.6
	2004	8	19	231	4	3.9	4	2.3	2.2	4.1	6.6	6.8	8.9	4.8
	2004	8	20	232	4.3	4	4.2	2.4	2.4	4.3	6.8	6.7	8.9	5.2
	2004	8	21	233	3.6	3.2	3.4	1.3	0.3	2.4	6.8	6.8	8.7	4.4
	2004	8	22	234	2.9	3.4	3.5	2.4	2.3	3.7	6.4	6.2	9.4	3.3
	2004	8	23	235	2.8	2.9	3	1.5	0.8	2.5	6.3	6.6	8.7	3.4
	2004	8	24	236	3.7	3.8	3.8	1.9	1.5	3.4	6.2	6.4	7.9	4.5
	2004	8	25	237	2.9	3.3	3.3	1.7	1.2	3	6	6.3	8.1	3.4
	2004	8	26	238	2.7	3	3.1	1.3	0.3	2.1	5.8	5.9	8	3.3
	2004	8	27	239	3.3	3.6	3.7	1.9	1.7	3.3	5.3	5.2	7.9	3.9
	2004	8	28	240	3.6	3.6	3.8	1.7	1.2	3	5.6	4.4	8	4.4
	2004	8	29	241	3	3.2	3.3	1.5	0.9	2.5	5.5	4.6	8.9	3.6
	2004	8	30	242	2.9	3.2	3.3	1.7	1.2	2.9	6.1	4.5	8.4	3.5
	2004	8	31	243	2.4	2.9	3	1.8	1.3	3.1	6.4	5.4	8.6	2.7
	2004	9	1	244	3	3.1	3.3	1.9	1.6	3.2	5.3	5	8.6	3.5
	2004	9	2	245	2.7	2.8	2.9	1.1	0	1.7	5.2	4.7	8.3	3.3
	2004	9	3	246	2.3	2.5	2.7	1.1	0.1	1.7	5.3	3.6	8.6	2.8
	2004	9	4	247	3.1	3	3.2	1.5	0.9	2.5	4.7	4.5	8.4	3.7
	2004	9	5	248	2.3	2.9	3	1.9	1.7	3.1	4.7	3.3	8.7	2.6
	2004	9	6	249	1.9	2.5	2.6	1.7	1.2	2.6	4.4	3.6	8.7	2.2
	2004	9	7	250	2	2.3	2.5	1.1	0.1	1.6	4.5	4.2	8.6	2.4
	2004	9	8	251	1.9	2.2	2.3	1	0	1.4	4.2	4.7	7.3	2.3
	2004	9	9	252	2.5	2.7	2.8	1.5	1.1	2.5	4.3	4.7	7.9	2.9
	2004	9	10	253	3.7	3.4	3.6	1.9	1.9	3.5	4.3	4.5	7.7	4.4
	2004	9	11	254	2.5	2.6	2.8	1.3	0.5	2.1	4.6	4.6	8	3
	2004	9	12	255	2.5	2.4	2.6	1.1	0.1	1.7	4.9	5.1	8	3.1
	2004	9	13	256	2.3	2.8	2.9	1.6	1.2	2.7	4.8	4.8	7.1	2.7
	2004	9	14	257	2	2.6	2.6	1.7	1.4	2.3	3.6	3.1	7.3	2.2
	2004	9	15	258	1.9	2.5	2.5	1.6	1.3	2.3	3.7	3.1	7.5	2.2
	2004	9	16	259	1.8	2.3	2.3	1.6	1.2	1.9	3.6	3.3	7.1	2
	2004	9	18	261	2.2	2.6	2.6	1.8	1.6	2.1	3.9	3.8	8.5	2.5
	2004	9	19	262	2.7	2.9	3	1.6	1.4	2.4	3.9	3.9	7.2	3.2
	2004	9	20	263	2.4	2.8	2.9	1.9	1.8	2.6	4.5	3.5	7.6	2.8
	2004	9	21	264	2.7	2.8	2.9	1.4	0.9	2.2	4.3	4.2	6.7	3.3
	2004	9	22	265	2.2	2.3	2.5	1.2	0.4	1.6	3.8	3.8	6.9	2.7
	2004	9	23	266	2.5	2.7	2.8	1.6	1.3	2.4	3.6	3.4	6.2	3
	2004	9	25	268	2.3	2.6	2.7	1.4	1.1	2.1	3.6	3.4	6.7	2.7
	2004	9	26	269	2.2	2.8	2.8	1.7	1.7	2.7	3.7	3.1	6.6	2.5
	2004	9	27	270	2	2.4	2.5	1.2	0.5	1.7	3.8	3	8	2.3
	2004	9	28	271	2	2.5	2.6	1.4	1.2	2.1	2.9	2	7.3	2.3
	2004	9	29	272	2.1	2.6	2.7	1.6	1.7	2.3	2.6	2.3	6.5	2.5
	2004	9	30	273	1.4	2.1	2.1	1.3	1.1	1.6	2.1	1.3	6.5	1.5
	2004	10	2	275	1.5	1.9	2	1.4	1	1.7	3.3	2.1	7.5	1.7
	2004	10	3	276	1.8	2.2	2.4	1.5	1.3	2.1	3	0.9	6.5	2
	2004	10	4	277	1.6	2.2	2.2	1.3	1.1	1.9	2.7	2.3	5.5	1.8
	2004	10	5	278	1.3	1.8	1.9	1.1	0.5	1.3	2.3	2	4.3	1.4
	2004	10	6	279	1.3	1.9	1.9	1	0.3	1.2	2.4	2	4.2	1.5
	2004	10	7	280	1.6	2.1	2.2	1.2	0.7	1.7	2.7	2	3.9	1.8
	2004	10	8	281	1.6	2.3	2.3	1.3	1.1	2	2.7	2.1	6.5	1.8
	2004	10	9	282	1.6	2.1	2.2	1.2	0.7	1.7	2.9	2.3	7.9	1.9
	2004	10	10	283	1.3	1.8	1.9	0.9	-0.1	0.8	2.2	1.6	6.6	1.5
	2004	10	11	284	1.6	2.1	2.2	1.2	0.9	1.6	2.2	1.5	5.4	1.8
	2004	10	12	285	1.4	2	2	1.2	0.9	1.5	2	1.4	3.6	1.6
	2004	10	13	286	1.5	2.1	2.1	1.2	1.1	1.7	2.2	1.7	2.4	1.7
	2004	10	14	287	1.8	2.2	2.3	1.3	1.3	2	2.3	1.8	2.5	2
	2004	10	15	288	1.6	2	2.2	1.2	1.1	1.8	2.2	0.7	2.5	1.9
	2004	10	16	289	1.8	2	2.1	1	0.7	1.3	1.6	1.7	4.2	2.2
	2004	10	17	290	1.4	1.7	1.8	1	0.8	1.1	1.2	1.3	5.1	1.6
	2004	10	18	291	1.2	1.5	1.5	1	0.9	0.8	1.1	1.3	4	1.3
	2004	10	19	292	1.6	1.8	2	0.7	-0.1	0.5	1.3	0.7	3.6	2
	2004	10	20	293	0.9	1.3	1.4	0.7	0	0.5	1.3	0.7	3.9	1
	2004	10	26	299	1	1.5	1.5	0.9	0.7	1	1.4	0.6	3.2	1.1
	2004	10	27	300	1.1	1.6	1.7	1	1.3	1.4	1.3	0.3	3.7	1.3
	2004	10	28	301	1.1	1.6	1.7	0.8	0.3	0.8	1.5	0.2	4.4	1.3
	2004	10	29	302	1.2	1.5	1.7	0.8	0	0.6	1.5	1.1	3.2	1.4
	2004	10	30	303	1.1	1.6	1.6	0.9	0.8	1.1	1.4	0.3	3.8	1.3
	2004	10	31	304	1.1	1.5	1.6	0.9	1	1	1.1	1	5.3	1.2
	2004	11	1	305	1.1	1.6	1.6	0.9	1	1.2	1.2	0.7	1.5	1.2
	2004	11	2	306	1	1.6	1.6	0.9	1	1.3	1.5	0.4	1.9	1.1
	2004	11	3	307	1.5	1.8	1.9	0.9	1	1.2	1.1	1	1.8	1.8
	2004	11	4	308	1.3	1.6	1.7	1	1.2	1.4	1.4	1.1	2.7	1.6
	2004	11	5	309	1.2	1.5	1.6	0.9	0.9	1.1	1.4	1	1.3	1.4
	2004	11	7	311	1	1.3	1.3	0.8	0.5	0.6	1.1	0.7	5.6	1.1
	2004	11	8	312	0.7	0.9	1	0.7	0.2	0.3	1.1	0.7	0.4	0.8
	2004	11	9	313	0.8	0.9	0.9	0.8	0.6	0.4	1	0.9	0.7	0.8
	2004	11	10	314	0.7	0.9	0.9	0.7	0.1	0.3	1.2	1.1	0.2	0.7
	2004	11	11	315	0.9	1.2	1.2	0.8	0.6	0.8	1.1	1	0.3	1
	2004	11	12	316	0.9	1.3	1.3	0.9	1.1	1.1	1.2	0.5	0.3	1
	2004	11	13	317	0.8	1.1	1.2	0.7	0.3	0.4	0.9	0.8	1.6	0.9
	2004	11	14	318	0.9	1.2	1.3	0.8	0.8	0.8	1.1	0.9	0.4	1.1
	2004	11	15	319	1.1	1.4	1.5	0.9	1.2	1.2	1.4	0.5	0.7	1.2
	2004	11	16	320	0.8	1.1	1.1	0.8	0.8	0.6	1.1	0.6	1.7	0.8
	2004	11	17	321	0.8	1.2	1.2	0.7	0.9	0.8	0.9	0.9	8.8	1
	2004	11	18	322	1.1	1.2	1.3	0.6	-0.1	0.2	0.8	1.3	1	1.3
	2004	11	19	323	1.1	1.3	1.4	0.7	-0.1	0.3	1.1	1.4	-999	1.3
	2004	11	20	324	1.1	1.2	1.3	0.7	0.5	0.6	1.1	1.2	1.4	1.3
	2004	11	21	325	1.1	1.3	1.3	0.7	1.1	1	1.1	1.3	2.8	1.3
	2004	11	22	326	0.8	1	1	0.6	0.6	0.3	0.8	1.3	0.3	0.9
	2004	11	23	327	0.6	0.8	0.8	0.6	-0.1	0.2	1	1.6	12	0.7
	2004	11	24	328	0.6	0.8	0.8	0.6	-0.1	0	0.8	1.5	-999	0.7
	2004	11	25	329	0.7	0.9	0.9	0.6	0.5	0.3	0.8	1.6	-999	0.7
	2004	11	26	330	0.6	0.8	0.8	0.6	0.9	0.3	0.7	1.4	-999	0.7
	2004	11	27	331	0.6	0.8	0.8	0.6	0.1	0.1	0.6	1.3	-999	0.7
	2004	11	28	332	0.8	1	1	0.6	-0.1	0.2	0.7	1.3	-999	0.8
	2004	11	29	333	0.7	0.9	1	0.5	0.5	0.4	0.6	1.1	-999	0.7
	2004	11	30	334	0.8	1.1	1.1	0.6	0.9	0.8	0.9	1.2	-999	0.9
	2004	12	1	335	0.7	1	1	0.6	0.8	0.7	0.9	1.6	-999	0.8
	2004	12	2	336	0.9	1.2	1.3	0.6	0.9	1.2	1.3	1.5	-999	1
	2004	12	3	337	0.8	1.1	1.1	0.6	0.9	0.8	1.1	1.5	-999	0.9
	2004	12	4	338	0.7	1	1.1	0.6	1	0.9	0.9	1.5	-999	0.8
	2004	12	5	339	0.6	0.7	0.7	0.6	0.6	0.2	0.8	1.4	-999	0.7
	2004	12	6	340	0.8	1	1	0.6	1	0.8	0.9	1.5	-999	0.9
	2004	12	7	341	0.8	1	1	0.6	0.4	0.5	0.8	1.5	-999	0.9
	2004	12	8	342	0.7	0.9	0.9	0.5	0.1	0.2	0.6	1.3	-999	0.8
	2004	12	9	343	0.6	0.7	0.7	0.6	0.6	0.3	1	1.4	-999	0.6
	2004	12	10	344	0.8	1	1	0.6	0.1	0.3	0.8	1.7	-999	0.9
	2004	12	11	345	0.7	0.9	0.9	0.5	0.5	0.2	0.5	1.3	-999	0.8
	2004	12	12	346	0.7	0.8	0.9	0.5	0.8	0.3	0.5	1.2	-999	0.9
	2004	12	13	347	1.1	1.1	1.2	0.5	0.2	0.4	0.7	1.2	-999	1.3
	2004	12	14	348	1	1	1.1	0.5	0.7	0.7	0.9	1.1	-999	1.2
	2004	12	15	349	0.8	0.9	1	0.5	1	0.7	0.9	1.2	-999	0.9
	2004	12	16	350	1.2	1	1.1	0.5	0.7	0.7	0.8	1.4	-999	1.4
	2004	12	17	351	1.3	1.2	1.3	0.5	0.9	0.9	0.9	1.4	-999	1.7
	2004	12	18	352	0.8	1.1	1.2	0.5	0.8	0.9	1.1	0.9	-999	1
	2004	12	19	353	0.9	1	1.1	0.5	0.8	0.7	0.7	0.7	-999	1
	2004	12	20	354	0.8	1	1.1	0.4	0.9	0.7	0.6	1	-999	1
	2004	12	21	355	0.8	1	1.1	0.5	0.8	0.7	0.8	1.3	-999	0.9
	2004	12	22	356	0.9	1	1.1	0.5	1	0.8	0.7	1.3	-999	1.1
	2004	12	23	357	0.8	1	1	0.5	0.4	0.4	0.7	1.2	-999	0.9
	2004	12	24	358	1.1	1.2	1.3	0.6	0.2	0.6	1.1	1.3	-999	1.4
	2004	12	25	359	1.3	1.1	1.3	0.5	0.8	0.8	0.9	1.4	-999	1.6
	2004	12	26	360	0.8	1	1	0.5	0.1	0.2	0.7	1.2	-999	0.9
	2004	12	27	361	0.6	0.8	0.8	0.5	0.5	0.1	0.5	1	-999	0.7
	2004	12	28	362	0.4	0.5	0.5	0.5	0.5	-0.4	0.3	0.9	-999	0.4
	2004	12	29	363	0.5	0.7	0.7	0.5	0.1	0	0.5	0.9	-999	0.5
	2004	12	30	364	0.5	0.6	0.6	0.5	0.4	-0.2	0.4	1	-999	0.5
	2004	12	31	365	-999	-999	-999	0.6	-999	-999	0.3	1	-999	-999
	2005	1	1	1	0.6	0.8	0.9	0.5	0.5	0.2	0.6	1.2	-999	0.7
	2005	1	2	2	0.6	0.8	0.8	0.6	-0.1	0.1	0.8	0.7	-999	0.6
	2005	1	3	3	0.9	1	1.1	0.6	0.5	0.5	0.9	0.9	-999	1.1
	2005	1	4	4	0.7	0.9	0.9	0.5	0.1	0.1	0.5	0.9	-999	0.8
	2005	1	5	5	0.6	0.7	0.7	0.6	-0.2	0	0.8	0.8	-999	0.7
	2005	1	7	7	-999	-999	-999	-999	0.4	-999	0.4	0.9	-999	-999
	2005	1	8	8	0.7	1	1	0.6	0.3	0.3	0.7	0.6	-999	0.9
	2005	1	9	9	0.6	0.7	0.7	0.5	0.3	0	0.5	0.9	-999	0.7
	2005	1	10	10	0.9	0.9	1	0.5	0.6	0.2	0.4	1	-999	1.1
	2005	1	11	11	0.9	1	1	0.5	0.6	0.3	0.6	1.1	-999	1.1
	2005	1	12	12	0.6	0.6	0.6	0.6	0.6	0	0.6	1.2	-999	0.6
	2005	1	13	13	0.6	0.8	0.8	0.6	0.6	0.2	0.7	1.3	-999	0.7
	2005	1	14	14	0.8	0.8	0.9	0.6	0.7	0.3	0.6	1.2	-999	0.9
	2005	1	15	15	1	0.9	1	0.6	0.3	0.2	0.5	1.1	-999	1.2
	2005	1	16	16	1.3	1.2	1.3	0.7	0.6	0.8	1	1.4	-999	1.5
	2005	1	17	17	1.2	1.3	1.4	0.6	0.5	0.5	0.8	1.3	-999	1.5
	2005	1	18	18	1	1.1	1.2	0.6	0.2	0.4	0.8	1	-999	1.2
	2005	1	19	19	0.6	0.9	0.9	0.6	0	0.1	0.6	0.7	-999	0.7
	2005	1	20	20	0.6	0.7	0.7	0.6	0.2	0.2	0.8	0.8	-999	0.6
	2005	1	21	21	0.6	0.7	0.6	0.6	0.4	0	0.6	1.1	-999	0.6
	2005	1	22	22	0.8	0.9	0.9	0.7	0.3	0.3	0.9	1.2	-999	1
	2005	1	23	23	0.7	0.7	0.8	0.6	0.3	0.1	0.7	1.1	-999	0.7
	2005	1	24	24	0.7	0.8	0.8	0.7	0.2	0.2	0.9	0.9	-999	0.8
	2005	1	25	25	0.6	0.7	0.8	0.7	0.5	0.1	0.6	1	-999	0.7
	2005	1	26	26	0.7	0.7	0.8	0.7	0.6	0	0.5	1.1	-999	0.7
	2005	1	27	27	0.6	0.7	0.7	0.7	0.5	0	0.5	1.2	-999	0.7
	2005	1	28	28	0.5	0.6	0.6	0.5	-0.2	-0.1	0.6	1.2	-999	0.5
	2005	1	29	29	0.8	1	1	0.6	0.2	0.2	0.7	1.2	-999	0.9
	2005	1	30	30	0.8	0.9	1	0.6	-0.2	0.1	0.7	1.1	-999	1
	2005	1	31	31	0.9	1	1.1	0.9	0.6	0.5	1.4	1.5	-999	1
	2005	2	1	32	0.6	0.8	0.8	0.6	-0.1	0.2	1.2	1	-999	0.7
	2005	2	2	33	0.8	1.1	1.1	0.8	0.8	0.7	1	1.3	-999	0.9
	2005	2	3	34	0.6	0.7	0.7	0.7	0.1	0.1	0.9	0.9	-999	0.6
	2005	2	4	35	0.7	0.8	0.8	0.8	0.4	0.3	1	1.2	-999	0.8
	2005	2	5	36	0.6	0.8	0.8	0.7	0	0.1	0.9	0.7	-999	0.7
	2005	2	6	37	0.6	0.7	0.8	0.7	0.2	0.1	0.7	0.9	-999	0.7
	2005	2	7	38	0.8	0.9	0.9	0.9	0.8	0.3	0.7	1.2	-999	0.8
	2005	2	8	39	0.7	0.9	0.9	0.8	0.5	0.2	0.8	0.7	-999	0.8
	2005	2	9	40	0.7	0.9	0.9	0.6	0.1	-0.1	0.4	0.8	-999	0.8
	2005	2	10	41	0.8	1	1	0.8	0.8	0.1	0.4	1.1	-999	0.9
	2005	2	11	42	0.6	0.8	0.8	0.7	0.2	0	0.5	0.8	-999	0.7
	2005	2	12	43	1	1.2	1.2	0.7	0.6	0.2	0.4	1.1	-999	1.2
	2005	2	13	44	0.9	1	1.1	0.8	0.8	0.2	0.4	1.2	-999	1
	2005	2	14	45	0.8	1	1	0.9	0.8	0.2	0.4	1.3	-999	0.9
	2005	2	15	46	1	1.1	1.1	1	1	0.3	0.6	1.6	-999	1.1
	2005	2	16	47	0.9	1	1	0.9	0.7	0.2	0.7	1.7	-999	0.9
	2005	2	17	48	1.1	1.2	1.2	1.1	1	0.7	1.3	2.3	-999	1.2
	2005	2	18	49	0.9	1	1	1	0.7	0.4	1.2	2.2	-999	1
	2005	2	19	50	1.1	1.2	1.3	0.8	0.1	0.5	1.7	1.7	-999	1.2
	2005	2	20	51	0.8	0.9	1	0.8	0.1	0.4	1.7	1.3	-999	0.9
	2005	2	21	52	1.2	1.4	1.4	1.1	0.9	1	1.4	1.6	-999	1.3
	2005	2	22	53	1.2	1.3	1.4	1.2	1.2	0.7	1.1	2	-999	1.2
	2005	2	23	54	1.2	1.4	1.4	1.3	1.3	0.8	1.1	2	-999	1.3
	2005	2	24	55	1.2	1.4	1.4	1.2	1.2	0.9	1.2	2.1	-999	1.3
	2005	2	25	56	1.3	1.5	1.5	1.3	1.3	1.1	1.1	2.3	-999	1.5
	2005	2	26	57	1.4	1.5	1.6	1.3	1.3	1.1	1.2	2.4	-999	1.5
	2005	2	27	58	1.1	1.1	1.2	0.7	0	0.4	1.2	2	-999	1.3
	2005	2	28	59	1.3	1.4	1.4	1.2	0.7	0.9	1.8	2.3	-999	1.4
	2005	3	1	60	1.7	1.7	1.9	0.9	0.1	0.9	2.1	1.8	-999	2.1
	2005	3	2	61	1.5	1.8	1.9	1.3	1.1	1.5	2.2	2.5	-999	1.7
	2005	3	3	62	1.2	1.4	1.5	0.9	0.1	0.9	2.8	1.7	-999	1.4
	2005	3	4	63	1.5	1.6	1.7	1.1	0.5	1	2.1	2.1	-999	1.8
	2005	3	5	64	1.9	2	2.2	1.5	1.8	1.9	1.7	2.4	-999	2.1
	2005	3	6	65	1.2	1.8	1.8	1	0.4	1	1.7	2.3	-999	1.4
	2005	3	7	66	2	2.4	2.5	1.4	1.5	1.9	2	2.1	-999	2.4
	2005	3	8	67	1	1.4	1.4	0.8	-0.1	0.6	1.7	1.4	-999	1.1
	2005	3	9	68	2.5	2.6	2.8	1.5	1.6	2.3	2.3	2	-999	3
	2005	3	10	69	1.9	2	2.2	1.1	0.6	1.1	1.8	1.8	-999	2.2
	2005	3	11	70	1.4	1.6	1.7	1.4	1.1	1.1	1.6	2	-999	1.6
	2005	3	12	71	1.3	1.5	1.5	1	0.6	0.7	1.2	1.7	-999	1.5
	2005	3	13	72	1.5	1.7	1.8	1.5	1.5	1.2	1.2	2.2	-999	1.6
	2005	3	14	73	1.6	1.8	1.9	1.6	1.7	1.4	1.4	2.5	-999	1.8
	2005	3	15	74	1.6	1.9	2	1.6	1.7	1.6	1.4	2.7	-999	1.8
	2005	3	16	75	2.1	2.3	2.4	1.7	2.2	1.8	1.4	3	-999	2.4
	2005	3	18	77	2.1	2.3	2.4	1.8	2.2	1.9	1.5	3.2	-999	2.4
	2005	3	19	78	2.6	2.5	2.8	1.9	2.2	2.4	2	3.1	-999	3.1
	2005	3	20	79	2.4	2.3	2.5	1.6	1.5	2.2	2.5	2.8	-999	2.8
	2005	3	21	80	1.7	1.9	2	1.3	0.9	1.5	2	2	-999	2
	2005	3	22	81	1.4	1.7	1.8	1	0.4	0.9	1.7	1.4	-999	1.6
	2005	3	23	82	2	2.3	2.4	1.6	1.7	1.7	1.8	2.2	-999	2.3
	2005	3	24	83	2.4	2.4	2.8	1.8	2.3	1.8	1	2.3	-999	2.9
	2005	3	25	84	1.7	1.8	2	1.6	1.7	1.1	0.7	2.4	-999	2
	2005	3	26	85	1.8	2	2.1	1.6	1.8	1.3	1	2.6	-999	2
	2005	3	27	86	2	2.3	2.4	1.8	2	1.7	1.7	3.4	-999	2.2
	2005	3	28	87	1.5	1.7	1.7	1.6	1.1	1.1	2.2	3.4	-999	1.6
	2005	3	29	88	2.1	2.3	2.4	1.7	1.5	2	2.9	3.7	-999	2.4
	2005	3	30	89	2.5	2.8	3	2.2	2.3	2.8	3.6	4	-999	2.9
	2005	3	31	90	2.4	2.6	2.7	2.1	2	2.5	3.2	4	-999	2.7
	2005	4	1	91	3	3	3.3	2.2	2.2	3.2	3.7	3.4	4.5	3.6
	2005	4	2	92	2.1	2.2	2.2	1.6	1.2	1.8	2.8	3.5	7.5	2.4
	2005	4	3	93	2.4	2.6	2.7	1.8	1.9	1.9	2.1	2.8	5.2	2.7
	2005	4	4	94	2.1	2.4	2.4	1.6	1.4	1.7	2	2.4	1.4	2.4
	2005	4	5	95	2	2.3	2.4	1.9	2	1.8	1.8	3.3	3.4	2.2
	2005	4	6	96	2	2.2	2.3	1.8	1.7	1.6	1.8	2.5	2.3	2.3
	2005	4	7	97	2.4	2.6	2.8	2.2	2.5	2.5	1.9	3.8	3.9	2.7
	2005	4	8	98	2.8	2.6	2.9	2.2	2.3	2.6	2.2	4.2	3.3	3.2
	2005	4	9	99	1.3	1.4	1.4	1.2	0.5	0.9	2.1	3.2	4.6	1.4
	2005	4	10	100	2.4	2.5	2.7	2.4	2.3	2.2	2.9	4.5	2.1	2.6
	2005	4	11	101	2.6	2.8	3	2.3	2.3	2.7	3.1	4.8	4.1	3
	2005	4	12	102	2.6	2.8	3	2.5	2.6	2.8	3.1	5	4.4	2.8
	2005	4	13	103	2.9	2.8	3	2.3	2.3	2.9	3.2	5.2	5.3	3.4
	2005	4	14	104	2.5	2.7	2.8	1.6	1	2.2	3.9	4.7	3.6	3
	2005	4	15	105	3.6	3.3	3.6	2.4	2.5	3.5	3.9	4.5	4.7	4.2
	2005	4	16	106	3	2.9	3.1	2.1	2.1	2.2	2.4	4.1	4.6	3.5
	2005	4	17	107	2.4	2.5	2.7	2.5	2.2	2	2.5	4.4	5.4	2.6
	2005	4	18	108	2.4	2.4	2.6	2.2	1.9	2.3	3.1	4.6	4.3	2.6
	2005	4	19	109	2.1	2.3	2.3	2.3	1.6	2.1	4.9	4.2	6.5	2.3
	2005	4	20	110	2.8	2.8	3	2.7	2.5	2.5	3.3	4.9	9.8	3.1
	2005	4	21	111	2.6	2.8	3	2.6	2.5	2.5	3.2	5.1	5.7	2.9
	2005	4	22	112	2.1	2.4	2.4	2.1	1.7	2.3	3.8	4.9	6.4	2.3
	2005	4	23	113	2	2.4	2.4	2	1.4	2.7	4.6	4.2	5.4	2.2
	2005	4	24	114	2.4	3	3	1.6	1.1	2.3	3.8	3.2	3.4	2.8
	2005	4	25	115	2.3	2.9	3	1.8	1.4	2.5	3.7	3.2	2.6	2.6
	2005	4	26	116	2.7	3	3	1.8	1.4	2.5	3.6	4.2	1.8	3.2
	2005	4	27	117	2.9	3.2	3.4	2.5	2.6	3.3	3.5	4.3	0.8	3.3
	2005	4	28	118	3.3	3.4	3.8	2.7	2.8	4	4.2	4.6	3.8	3.8
	2005	4	29	119	3.1	3.3	3.7	2.7	3	3.7	3.3	4.9	5.6	3.6
	2005	4	30	120	3.6	3.5	4	2.8	3.2	4	3.6	5.6	5.6	4.2
	2005	5	1	121	3.2	3.3	3.7	2.6	2.7	3.7	3.9	5	6.9	3.7
	2005	5	2	122	2.9	3.1	3.4	2.3	2.3	3.2	3.5	4.3	5.3	3.4
	2005	5	3	123	2.8	2.9	3	1.6	1.2	2.3	2.8	3.3	2.7	3.4
	2005	5	4	124	3.1	3.1	3.4	2.3	2.4	3	2.6	4	3.3	3.6
	2005	5	5	125	3.1	3.1	3.3	2.1	2.1	2.7	2.7	4.3	4.2	3.7
	2005	5	6	126	3.6	3.5	4	2.8	3.2	3.8	3.2	5.2	3.4	4.2
	2005	5	7	127	3.4	3.7	4.1	3.1	3.4	4.1	4.5	5.4	3.8	3.8
	2005	5	8	128	3.4	3.6	3.8	2.6	2.7	4	5	5.9	5	3.9
	2005	5	9	129	4	4.2	4.7	3.3	3.8	4.5	4.8	4.5	6.8	4.6
	2005	5	10	130	2.9	3.2	3.4	3	2.9	3.2	3.9	5.9	6.8	3.2
	2005	5	11	131	2.9	3.2	3.4	3	2.9	3.3	4.4	6.2	6.8	3.2
	2005	5	12	132	2.8	2.9	3.1	3.2	2.5	2.6	4.8	6.5	5.9	2.9
	2005	5	13	133	3.4	3.4	3.7	3	2.9	3.4	4.6	6.5	6.4	3.8
	2005	5	14	134	4.1	4	4.5	3.1	3.3	4.4	5.1	5.7	6.3	4.8
	2005	5	15	135	3.1	3.4	3.5	2.6	2.5	2.9	4.8	5.8	6.3	3.5
	2005	5	16	136	3.5	3.7	4.1	3.3	3.5	4.1	4.7	5.8	6.6	3.8
	2005	5	17	137	2.6	2.7	2.8	2.3	1.9	3	4.5	6	6.7	2.9
	2005	5	18	138	3.1	3.4	3.6	3	3.1	3.5	4.1	6.3	7.2	3.3
	2005	5	19	139	3.5	3.6	4	3.3	3.3	4.2	4.7	6.4	7	3.8
	2005	5	20	140	3.5	3.7	4.1	3.1	3.3	4.2	4.6	6.4	7.1	3.9
	2005	5	21	141	3.4	3.8	4.1	3.1	3.3	4.4	5.5	6.7	6.9	3.8
	2005	5	22	142	3.8	4	4.4	3.3	3.4	5	5.9	6.6	7.7	4.2
	2005	5	23	143	4.1	4.6	4.7	3	3.5	5.1	6.6	7	7.5	4.8
	2005	5	24	144	4	4.1	4.5	3	3.2	4.9	5.9	6	9.2	4.7
	2005	5	25	145	4.7	4.5	4.7	3	3.5	4.5	4.7	6.4	8.5	5.6
	2005	5	26	146	3.9	4.1	4.4	3	3.4	4.5	5.3	6.4	6	4.5
	2005	5	27	147	3.6	3.9	4.1	3	3.3	4.4	5.4	7	8.6	4.1
	2005	5	28	148	4	4.3	4.8	3.6	4	5.4	6.7	7.2	8.8	4.4
	2005	5	29	149	4.4	4.2	4.7	3.2	3.4	5	5.6	6.9	9.1	5.2
	2005	5	30	150	3.4	3.6	3.9	2.8	2.8	4.2	4.8	5.9	9.4	3.8
	2005	5	31	151	3.9	4.1	4.3	3	3.3	4.5	5.1	7	8.3	4.5
	2005	6	1	152	3	3.2	3.4	2.4	2.1	3.5	4.7	5.4	8.9	3.4
	2005	6	2	153	3.1	3.3	3.5	2.6	2.5	3.8	4.6	5.9	1.7	3.5
	2005	6	3	154	3.6	4	4.2	3.2	3.5	4.5	5.3	6.6	3.1	4
	2005	6	4	155	2.7	3.2	3.3	2.3	2	3.3	5.6	6	3.1	3.1
	2005	6	5	156	3.4	3.9	4	2.9	3.2	4	5.1	5.4	0.5	3.8
	2005	6	6	157	4.6	4.6	5	3.3	4	5.2	5	6.1	5.2	5.3
	2005	6	7	158	3.5	4	4.2	3.3	3.8	4.6	5.1	7.1	7.8	3.9
	2005	6	8	159	3.7	3.9	4.3	3.6	3.7	4.8	5.7	7.9	8.3	4
	2005	6	9	160	3.9	4.1	4.5	3.6	3.8	5.3	6.3	8	8.4	4.4
	2005	6	10	161	4.7	4.6	5.1	3.7	4.1	5.8	7	8.3	7.8	5.4
	2005	6	11	162	5.2	4.6	5.1	3.3	3.5	5.6	7.3	8	7.9	6.2
	2005	6	12	163	5.6	4.9	5.6	3.6	4.1	6.2	6.8	7.8	10.2	6.7
	2005	6	13	164	4.8	4.7	5.2	3.7	4.2	5.8	6.7	7.5	10.5	5.5
	2005	6	14	165	3.9	4.1	4.5	3.4	3.5	4.9	6.8	7.2	11.1	4.4
	2005	6	15	166	3.4	3.7	3.9	2.7	2.4	4.3	7.9	7.6	10.4	3.9
	2005	6	16	167	5.1	5.2	5.4	3.7	4.6	5.9	7	8	9.4	5.9
	2005	6	17	168	4.8	4.9	5.2	3.7	4.4	5.5	6.4	7.6	11.3	5.5
	2005	6	18	169	4.4	4.6	4.9	3.4	3.9	5.4	6.7	7.9	11.1	5
	2005	6	19	170	5.6	5.2	5.5	3.5	4.3	5.9	6.7	8.1	9.5	6.7
	2005	6	20	171	5.7	5.3	5.6	3.3	4.1	6	6.5	7.4	9.1	6.9
	2005	6	21	172	5.5	5.6	5.8	3.5	4.7	6.4	6.1	6.5	10.3	6.6
	2005	6	22	173	6	5.7	5.7	3.1	4	5.8	6.1	6.6	9.3	7.3
	2005	6	23	174	5.1	5.2	5.4	3.4	4.3	5.9	6.5	6.7	10.2	6
	2005	6	24	175	3.9	4.7	4.5	3.5	4.4	5.1	6.1	8	9.1	4.3
	2005	6	25	176	5.3	5.2	5.4	3.4	4.4	6	6.6	8.2	9.4	6.2
	2005	6	26	177	6.2	5.7	5.7	3.1	3.9	5.8	6.8	7.6	8.5	7.6
	2005	6	27	178	5	5.2	5.3	3.4	4.2	5.8	7.1	7.4	6.7	5.9
	2005	6	28	179	4.6	5.2	5.2	3.3	4.1	5.9	7.8	7.2	7.9	5.4
	2005	6	29	180	4	4.7	4.7	3.1	3.5	5.3	8.1	8	7.9	4.6
	2005	6	30	181	5.1	5.2	5.4	3.6	4.3	5.8	7.5	7.5	9.3	5.9
	2005	7	1	182	5.1	5.2	5.4	3.5	4.1	5.8	8	7.8	9.2	6
	2005	7	2	183	5.5	5.4	5.7	3.6	4.3	6.3	8	8.2	9.3	6.5
	2005	7	3	184	6.5	5.9	6.3	3.6	4.4	6.9	8.4	8	9	7.9
	2005	7	4	185	6.8	6.1	6.5	3.6	4.5	7.2	8.6	8.5	9.7	8.3
	2005	7	5	186	5.5	5.2	5.8	3.5	4.2	6.5	6.8	7.1	11.5	6.6
	2005	7	6	187	5.8	5.5	5.9	3.4	4.1	6.3	7.5	7.1	8.4	7
	2005	7	7	188	5.2	5	5.5	3.6	4	6.3	8	7.9	9.8	6.1
	2005	7	8	189	4.4	5.2	5.1	3.4	4.4	5.9	8.4	8.4	8.5	5
	2005	7	9	190	6	6	6	3.4	4.6	6.8	8.7	8.7	9.3	7.2
	2005	7	10	191	7.3	6.5	6.5	3.5	4.5	7	8.6	8.8	9.2	9
	2005	7	11	192	6.4	6	6.3	3.7	4.6	7.2	9.2	8.7	9.9	7.7
	2005	7	12	193	5.8	5.8	6	3.7	4.6	7	9.5	8.6	9.9	6.9
	2005	7	13	194	6	5.9	6.2	3.9	4.9	7.4	9	8.8	9.8	7.1
	2005	7	14	195	5.3	5	5.6	3.8	4.2	6.7	8.7	8.8	11.3	6.2
	2005	7	15	196	5.5	5.5	6	3.8	4.5	7.1	9	7.5	10.9	6.5
	2005	7	17	198	4.4	5	4.9	3.4	4	5.2	8.1	7.8	9.7	5
	2005	7	19	200	4.9	5.3	5.2	3.4	4.4	5.6	7.8	8	9.1	5.7
	2005	7	20	201	5.1	5.3	5.3	3.3	4.1	5.9	7.8	8.2	9.6	6.1
	2005	7	21	202	5.4	5.5	5.5	3.4	4.3	6.2	8	8.2	8.3	6.4
	2005	7	22	203	5.2	5.2	5.5	3.5	4.1	6.4	8.9	8.3	9.7	6.1
	2005	7	23	204	4.9	5.3	5.3	3.4	4.2	6.1	8.7	8.4	9	5.7
	2005	7	24	205	5.6	5.6	5.7	3.4	4.2	6.5	9.1	8.6	9.1	6.6
	2005	7	25	206	5.1	5.4	5.6	3.5	4.3	6.8	8.8	7.9	10	6
	2005	7	26	207	4.6	5	5.1	3.1	3.7	5.9	8.3	8.1	10.5	5.3
	2005	7	27	208	5.8	5.7	5.9	3.4	4.3	6.8	9.2	8.5	9	6.9
	2005	7	29	210	4.6	5.5	5.4	3.3	4.1	6.7	10.2	8	10.8	5.3
	2005	7	30	211	4.9	5.4	5.6	3.5	4.2	6.8	9.5	7.7	8.8	5.7
	2005	8	1	213	5.4	5.5	5.7	3.3	4.2	6.4	8.2	7.5	10.2	6.5
	2005	8	2	214	4.5	4.4	4.8	2.9	3.1	5.3	7.8	6.9	11.3	5.3
	2005	8	3	215	3.9	4.3	4.5	2.9	3.2	5.2	7.6	7	9.7	4.5
	2005	8	4	216	3.6	4.3	4.5	3.1	3.4	5.3	7.8	6.7	9.5	4
	2005	8	5	217	3.6	4.2	4.4	3.1	3.5	5.5	7.5	7.5	10.8	4
	2005	8	6	218	4.1	4.4	4.8	3.3	3.5	5.9	8.1	7.5	10.9	4.7
	2005	8	7	219	5.4	4.8	5.4	3.4	3.6	6.2	8.4	7.7	11.1	6.4
	2005	8	8	220	5.7	5.1	5.8	3.5	3.9	6.8	8.7	7.7	10.8	6.8
	2005	8	9	221	5.5	5	5.6	3.4	3.8	6.5	8.9	8.1	9.9	6.6
	2005	8	10	222	4.7	4.7	5	3	3.2	5.8	9.2	7.6	8.8	5.6
	2005	8	11	223	4.9	4.9	5.1	2.9	3.1	5.5	8.9	6.7	10.4	5.8
	2005	8	12	224	4	4.3	4.6	3.3	3.6	5.3	7.6	7.2	8.4	4.5
	2005	8	13	225	3.3	3.8	4	3.2	3.1	5.2	7.7	7.5	7.2	3.6
	2005	8	14	226	4.2	4.3	4.8	3.4	3.6	5.9	7.9	7.7	10.4	4.8
	2005	8	15	227	3.8	4.1	4.5	3.4	3.5	5.9	8.2	7.6	9	4.3
	2005	8	16	228	3.7	4	4.4	3.3	3.3	5.7	8.1	7.7	9.7	4.2
	2005	8	17	229	4.1	4.3	4.7	3.2	3.4	5.7	8	7.5	9.4	4.7
	2005	8	18	230	4.2	4.2	4.6	3.2	3.4	5.7	7.9	7.7	10.9	4.9
	2005	8	19	231	3.8	4	4.3	3.3	3.3	5.4	7.9	7.5	11.7	4.3
	2005	8	20	232	4.7	4.3	4.7	3.4	3.5	5.9	7.9	7.6	11.6	5.5
	2005	8	21	233	4.7	4.3	4.8	3.3	3.3	5.8	8.1	6.9	9.5	5.4
	2005	8	22	234	4.4	4.1	4.6	3.1	3.2	5.6	7.5	6.5	11.4	5.1
	2005	8	23	235	3.6	4.1	4.3	3.2	3.5	5	7.6	7.1	8.2	4
	2005	8	24	236	4.2	4.2	4.6	3.3	3.4	5.2	7.8	7.3	10.9	4.8
	2005	8	25	237	4.3	4.2	4.6	3.2	3.3	5.9	8	6.8	11.5	5
	2005	8	26	238	3.6	3.8	4.2	3.1	3.2	5.2	7	6.6	10.2	4.1
	2005	8	27	239	3.7	3.8	4.1	3	3.1	5.1	6.8	6.7	9.8	4.3
	2005	8	28	240	4	4	4.4	3	3.2	5.5	6.9	6.2	10.2	4.6
	2005	8	29	241	4.8	4.2	4.7	3	3.2	5.6	6.8	6.6	9.4	5.7
	2005	8	30	242	3.9	3.9	4.3	3.1	3	5.2	7.7	5.5	9.1	4.5
	2005	8	31	243	3.7	3.8	4.2	3	3	4.9	7.3	5.5	10.5	4.2
	2005	9	1	244	3	3.6	3.7	2.5	2.5	4.3	6.9	6.1	9.1	3.3
	2005	9	2	245	3.9	4.1	4.4	2.9	3.2	5	6.7	5.8	8.6	4.5
	2005	9	3	246	3.9	4.1	4.4	2.7	3	4.9	6.7	5.3	9.5	4.5
	2005	9	4	247	3.3	3.4	3.7	2.5	2.4	4.1	6.1	4.8	10.5	3.8
	2005	9	5	248	3.9	3.8	4.3	2.8	3.1	4.9	5.4	4.8	8.7	4.5
	2005	9	6	249	3	3.2	3.5	2.6	2.7	4.1	4.9	5.5	9.5	3.4
	2005	9	7	250	2.8	3.2	3.4	2.6	2.8	4.2	5.1	5.9	7.4	3.1
	2005	9	8	251	3.2	3.2	3.5	2.6	2.7	4.2	5.2	5.9	8.5	3.7
	2005	9	9	252	2.9	3.1	3.2	2.4	2.3	3.9	5.4	5.8	8.1	3.3
	2005	9	10	253	3.3	3.4	3.7	2.6	2.8	4.7	5.9	6	8.8	3.8
	2005	9	11	254	4.2	3.7	4.1	2.5	2.9	4.7	4.8	5.2	9.7	5.1
	2005	9	12	255	3.4	3.4	3.7	2.6	2.9	4.4	4.9	5.4	10.4	4
	2005	9	13	256	3.5	3.3	3.7	2.5	2.8	4.4	5	5.5	7.1	4
	2005	9	14	257	3	3.7	3.7	2.4	3	4.3	5.4	5.6	7.9	3.4
	2005	9	15	258	2.9	3.6	3.6	2.4	3	3.9	5.4	5.6	6.1	3.3
	2005	9	16	259	2.9	3.7	3.7	2.3	3	4	5.5	5.4	6.8	3.3
	2005	9	19	262	3	3.4	3.4	2.4	2.6	3.2	5.7	5.7	6.3	3.4
	2005	9	20	263	3.7	3.8	3.9	2.3	2.7	4	5.5	5.4	5.9	4.3
	2005	9	21	264	3.1	3.4	3.5	2.3	2.6	3.5	5.5	5.4	7.8	3.6
	2005	9	22	265	3.6	3.5	3.7	2.2	2.4	3.9	5.5	5.3	6.7	4.2
	2005	9	23	266	3.3	3.4	3.6	2.4	2.7	4	5.4	4.9	7.7	3.8
	2005	9	24	267	3.3	3.1	3.4	2.4	2.5	4	5	4.7	8.6	3.8
	2005	9	26	269	2.9	3	3.2	2.2	2.3	3.7	4.6	4.3	6.5	3.4
	2005	9	27	270	2.6	2.9	3.1	2.1	2.3	3.6	4.5	4.4	6.2	3
	2005	9	28	271	2.6	3.1	3.1	1.8	1.9	3	4.7	4	6.1	3.1
	2005	9	29	272	2.7	3.2	3.2	1.5	1.2	2.7	4.8	3.9	5.1	3.2
	2005	9	30	273	2.4	2.7	2.8	1.6	1.5	2.6	3.6	3.3	3.9	2.8
	2005	10	1	274	2.1	2.7	2.8	1.9	2.3	3.2	3.7	3.9	1.8	2.3
	2005	10	2	275	2	2.6	2.6	1.9	2.2	2.8	3.8	4	4.5	2.2
	2005	10	3	276	2.2	2.5	2.6	1.8	1.8	2.4	4	4	4.7	2.4
	2005	10	4	277	2.5	2.8	3	1.9	2.3	3.1	3.8	3.5	4.4	2.9
	2005	10	5	278	2.1	2.5	2.6	1.9	2.1	3.2	3.7	3.8	4.6	2.4
	2005	10	6	279	1.9	2.4	2.5	1.9	2.1	3.1	3.4	3.7	4.6	2.1
	2005	10	7	280	2.1	2.4	2.5	1.8	2	2.9	3.1	3.9	3.9	2.3
	2005	10	8	281	2.1	2.4	2.6	1.8	2.1	3	3.1	3.5	7.5	2.4
	2005	10	9	282	2	2.4	2.5	1.7	2	2.7	2.7	3.6	5.1	2.3
	2005	10	10	283	2.2	2.5	2.6	1.6	1.8	2.9	3.3	4	3.5	2.6
	2005	10	11	284	2.4	2.5	2.7	1.7	1.8	3.3	4.3	4.7	3.8	2.8
	2005	10	12	285	2.2	2.6	2.7	1.6	1.4	3.4	5.8	3.3	6.4	2.5
	2005	10	13	286	2.1	2.5	2.6	1.7	1.8	3.3	4.3	4.2	7.1	2.4
	2005	10	14	287	1.8	2.2	2.2	1.4	1	2.5	4.4	3.8	4.6	2.1
	2005	10	15	288	2.4	2.6	2.7	1.8	1.9	3.4	4.2	3.8	5.1	2.8
	2005	10	16	289	2.5	2.5	2.7	1.5	1.4	3	4.4	3.5	7.1	2.9
	2005	10	17	290	2.9	3.3	3.3	1.4	1.9	3	3.5	2.3	5.3	3.5
	2005	10	18	291	2.3	2.7	2.8	1.5	1.8	2.8	3.5	2.8	7.2	2.7
	2005	10	19	292	1.6	2	2.1	1.1	0.4	1.3	3.3	2.6	3.2	1.9
	2005	10	20	293	2.2	2.2	2.3	1.2	1.3	2	2	1.8	5	2.7
	2005	10	21	294	1.4	1.7	1.8	1.2	1.4	1.7	1.6	2.4	3.3	1.6
	2005	10	23	296	1.6	2	2	1.2	1.6	2	1.9	2.8	2.4	1.9
	2005	10	24	297	1.4	1.8	1.9	1.2	1.4	1.8	1.9	2.8	1.2	1.6
	2005	10	25	298	1.5	1.8	1.9	1.2	1.5	1.9	2	2.9	3.2	1.7
	2005	10	26	299	1.9	2.1	2.2	1.2	1.6	2.3	2.4	3.1	4.9	2.2
	2005	10	27	300	1.5	2	2	1.2	1.4	2	2.4	3	3	1.7
	2005	10	28	301	1.7	2.1	2.2	1.2	1.5	2.2	2.5	3	3.1	1.9
	2005	10	29	302	1.8	2.3	2.3	1.1	1	2	2.9	2.5	5.4	2.1
	2005	10	30	303	1.9	1.9	2.1	1.2	1.1	2.1	2.9	2.9	6	2.3
	2005	10	31	304	1.6	1.9	2	1.2	1.4	2.3	2.6	2.6	3.9	1.9
	2005	11	1	305	1.3	1.8	1.8	1	1.4	1.6	1.5	2	3.6	1.5
	2005	11	2	306	1.3	1.6	1.7	1	1.1	1.5	1.5	2.2	2.5	1.5
	2005	11	3	307	1.2	1.6	1.7	1	0.9	1.6	2	2	3.2	1.3
	2005	11	4	308	2.3	2.1	2.3	1	1.3	2	2	2.4	1.8	2.9
	2005	11	5	309	1.4	1.4	1.5	0.8	0.3	0.9	1.7	1.7	3.6	1.6
	2005	11	6	310	1.4	1.5	1.6	0.9	0.9	1.2	1.6	1.8	2.7	1.7
	2005	11	7	311	1.4	1.4	1.5	0.9	0.7	1	1.6	1.8	2.7	1.6
	2005	11	8	312	1.4	1.4	1.5	1	0.9	1.2	1.7	2.2	1.4	1.7
	2005	11	9	313	1	1.1	1.2	1	0.9	0.9	1.7	2.1	2.9	1.1
	2005	11	10	314	0.9	1	1	1	0.8	0.7	1.6	2.2	4.5	1
	2005	11	11	315	0.9	1.1	1.1	0.9	0.8	0.7	1.3	2	1.4	1
	2005	11	12	316	1.1	1.4	1.4	0.8	0.9	1	1.3	2	2.3	1.3
	2005	11	13	317	1	1.3	1.3	0.8	0.8	1.1	1.4	1.9	2.7	1.1
	2005	11	14	318	1	1.2	1.3	0.8	0.8	0.8	1.2	1.8	-999	1.2
	2005	11	15	319	1.2	1.2	1.3	0.8	0.7	0.9	1.3	1.9	-999	1.4
	2005	11	16	320	1.2	1.2	1.3	0.8	0.9	1	1.4	1.9	-999	1.4
	2005	11	17	321	0.9	1	1	0.8	0.6	0.7	1.4	1.8	-999	0.9
	2005	11	18	322	1	1.2	1.3	0.8	0.6	0.9	1.4	1.7	-999	1.2
	2005	11	19	323	1.2	1.4	1.5	0.8	0.2	0.8	1.7	1.2	-999	1.4
	2005	11	20	324	1.1	1.4	1.4	0.7	0	0.4	1.2	1.2	-999	1.3
	2005	11	21	325	1.3	1.5	1.6	0.7	-0.2	0.3	1.6	0.8	-999	1.5
	2005	11	22	326	1.2	1.5	1.6	0.7	0.4	0.7	1.4	1.1	-999	1.4
	2005	11	23	327	0.8	1.2	1.2	0.6	0.5	0.4	0.9	1	-999	0.9
	2005	11	24	328	0.6	1	1	0.6	0.6	0.3	0.8	1.2	-999	0.7
	2005	11	25	329	0.7	1	1	0.6	0.5	0.3	0.9	1.3	-999	0.8
	2005	11	27	331	0.7	1.1	1	0.7	0.4	0.5	1.2	1.4	-999	0.7
	2005	11	28	332	0.8	1.2	1.2	0.7	0.5	0.6	1.3	1.6	-999	0.8
	2005	11	29	333	0.8	1.4	1.4	0.7	0.3	0.7	1.2	1.2	-999	0.9
	2005	11	30	334	0.9	1.5	1.5	0.7	0.6	1.2	1.8	1.6	-999	1
	2005	12	1	335	1	1.5	1.5	0.7	0.7	1	1.5	1.7	-999	1.1
	2005	12	2	336	0.8	1.3	1.3	0.7	0.6	0.8	1.4	1.6	-999	0.9
	2005	12	3	337	1	1.6	1.5	0.7	0.3	0.7	1.4	1.3	-999	1.1
	2005	12	4	338	1	1.4	1.4	0.7	0.6	1.1	1.8	1.7	-999	1.1
	2005	12	5	339	0.9	1.3	1.3	0.7	0.6	1.1	1.7	1.7	-999	1
	2005	12	6	340	0.7	0.9	0.9	0.7	0.5	0.4	1.4	1.6	-999	0.8
	2005	12	7	341	0.9	1.2	1.3	0.6	0.7	0.9	1.3	1.5	-999	1
	2005	12	8	342	0.8	1.2	1.2	0.6	0.5	0.8	1.1	1.5	-999	0.9
	2005	12	9	343	0.7	1.1	1.1	0.6	0.5	0.7	1.2	1.5	-999	0.8
	2005	12	10	344	0.6	0.8	0.8	0.6	0.3	0.2	1.1	1.4	-999	0.6
	2005	12	11	345	0.8	1.2	1.2	0.6	0.6	0.7	1.2	1.6	-999	0.9
	2005	12	12	346	0.8	1.1	1.1	0.6	0.5	0.6	1.1	1.4	-999	0.9
	2005	12	13	347	0.9	1.1	1.1	0.6	0.5	0.5	1	1.4	-999	1
	2005	12	14	348	1.2	1.3	1.4	0.6	0.5	0.7	1	1.4	-999	1.5
	2005	12	15	349	0.9	1	1	0.6	0	0.2	0.8	1	-999	1.1
	2005	12	16	350	1	1.4	1.4	0.6	0.6	0.9	1.6	1	-999	1.2
	2005	12	17	351	1.4	1.7	1.8	0.6	0.7	1.1	1.6	1	-999	1.7
	2005	12	18	352	1.4	1.7	1.8	0.6	0.8	1.3	1.6	0.9	-999	1.7
	2005	12	19	353	1.1	1.7	1.7	0.6	0.7	0.9	1.3	1	-999	1.4
	2005	12	20	354	1.4	1.8	1.8	0.6	0.7	1.2	1.6	0.9	-999	1.7
	2005	12	21	355	1	1.6	1.6	0.6	0.6	1	1.4	0.8	-999	1.2
	2005	12	22	356	0.8	1.4	1.4	0.5	0.6	0.8	1.1	0.9	-999	1
	2005	12	23	357	0.9	1.4	1.4	0.5	0.6	0.7	1	0.5	-999	1.1
	2005	12	24	358	0.8	1.2	1.3	0.5	0.5	0.6	0.9	0.8	-999	0.9
	2005	12	25	359	1	1.3	1.4	0.5	0.5	0.5	0.8	0.5	-999	1.2
	2005	12	26	360	1.1	1.3	1.4	0.6	0	0.2	0.7	0.8	-999	1.3
	2005	12	27	361	0.7	1	1	0.5	-0.1	-0.1	0.4	0.7	-999	0.8
	2005	12	28	362	0.6	1	1	0.5	-0.2	-0.1	0.4	0.8	-999	0.7
	2006	1	1	1	0.8	0.9	1	0.5	0.3	0.2	0.5	1	-999	0.9
	2006	1	2	2	0.8	1	1	0.6	-0.1	0.1	0.7	0.5	-999	0.9
	2006	1	3	3	0.7	0.7	0.8	0.5	-0.2	0	0.7	0.5	-999	0.8
	2006	1	4	4	0.7	0.8	1	0.4	1.6	0.1	0.3	0.6	-999	0.8
	2006	1	5	5	0.4	0.5	0.5	0.5	0.5	-0.1	0.5	0.6	-999	0.5
	2006	1	6	6	0.7	0.9	0.9	0.5	1.2	0.4	0.6	0.7	-999	0.8
	2006	1	7	7	0.6	0.8	0.8	0.6	0.6	0.4	1	0.7	-999	0.6
	2006	1	8	8	0.9	1.1	1.2	0.6	1.1	0.9	1	0.6	-999	1.1
	2006	1	9	9	0.9	1.1	1.2	0.6	0.9	0.8	1.1	0.8	-999	1.1
	2006	1	10	10	1	1.2	1.3	0.6	1.4	1	0.9	0.7	-999	1.2
	2006	1	11	11	0.9	1.1	1.2	0.7	1.5	1.1	1.1	1	-999	1.1
	2006	1	12	12	0.8	1	1.1	0.6	1.7	1	0.8	0.5	-999	0.9
	2006	1	13	13	0.6	0.7	0.7	0.6	0	0.1	0.8	0.7	-999	0.6
	2006	1	14	14	0.6	0.9	0.9	0.6	0.4	0.4	0.8	0.7	-999	0.7
	2006	1	15	15	0.5	0.8	0.8	0.6	0.1	0.1	0.6	1.1	-999	0.6
	2006	1	16	16	0.6	0.9	1	0.6	1.7	0.6	0.5	1	-999	0.7
	2006	1	17	17	0.7	1	1.1	0.5	2.1	0.5	0.4	1	-999	0.8
	2006	1	18	18	0.7	0.9	1	0.6	1.8	0.3	0.4	1	-999	0.7
	2006	1	19	19	0.7	0.8	0.8	0.9	1.7	-0.2	0.6	0.4	-999	0.7
	2006	1	20	20	0.7	0.7	0.7	0.9	1.3	-0.3	0.6	0.5	-999	0.7
	2006	1	21	21	-999	-999	-999	-999	1	-999	0.4	0.8	-999	-999
	2006	1	22	22	0.7	0.9	1	0.7	1.7	-0.1	0.2	0.7	-999	0.8
	2006	1	23	23	0.7	0.9	1.1	0.7	1.8	0.1	0.3	0.4	-999	0.8
	2006	1	24	24	0.7	0.9	1	0.8	1.7	0	0.4	0.6	-999	0.7
	2006	1	25	25	0.7	0.9	1	0.8	1.5	0.3	0.5	1	-999	0.8
	2006	1	26	26	0.8	1	1	0.9	1.3	0.5	0.8	0.9	-999	0.8
	2006	1	27	27	0.9	1.1	1.2	0.9	1.9	0.8	0.7	0.8	-999	1
	2006	1	28	28	0.7	0.8	0.8	1	1.3	-0.1	0.6	0.8	-999	0.7
	2006	1	29	29	1	1.1	1.2	0.7	1.1	0.3	0.4	1	-999	1.2
	2006	1	30	30	0.7	0.9	0.9	1	1.6	-0.5	0.4	0.9	-999	0.7
	2006	1	31	31	1	1.1	1.2	0.7	1.1	0.2	0.3	0.9	-999	1.2
	2006	2	1	32	0.8	1	1.1	1.1	1.8	-0.5	0.3	0.8	-999	0.8
	2006	2	2	33	0.9	1	1.1	1.3	1.8	-0.2	0.6	0.6	-999	0.9
	2006	2	3	34	1	1.1	1.2	1.4	1.9	0	0.8	0.4	-999	1
	2006	2	4	35	1.2	1.3	1.4	1.6	2.1	0.3	1.1	1.3	-999	1.2
	2006	2	5	36	0.6	0.6	0.6	0.8	0.2	0	0.9	1.3	-999	0.6
	2006	2	6	37	0.9	1	1	1.2	1.1	0.4	1.3	1.5	-999	0.9
	2006	2	7	38	1.1	1.2	1.3	1	1	0.9	1.3	1.2	-999	1.2
	2006	2	8	39	1.3	1.5	1.6	1.4	2.2	1.4	1.3	1.7	-999	1.4
	2006	2	9	40	1.4	1.7	1.9	1.5	2.9	1.5	1.3	1.2	-999	1.5
	2006	2	10	41	1.5	1.8	2.1	1.7	3.2	1.7	1.2	1.4	-999	1.7
	2006	2	11	42	1.8	2.1	2.5	1.8	3.4	2.5	1.5	1.3	-999	2.1
	2006	2	12	43	1.2	1.4	1.5	1.2	1.7	0.9	1.2	1.7	-999	1.3
	2006	2	13	44	1.4	1.6	1.8	2	2.5	0.8	1.4	0.8	-999	1.5
	2006	2	14	45	1.2	1.4	1.4	1.7	1.9	0.4	1.2	0.9	-999	1.2
	2006	2	15	46	0.9	1	1	1.3	1.2	0	0.8	0.9	-999	0.9
	2006	2	16	47	0.7	0.9	0.9	0.8	0.3	0.1	0.6	1.1	-999	0.8
	2006	2	17	48	1.1	1.3	1.5	1.4	2	0.2	0.4	1.1	-999	1.2
	2006	2	18	49	1.2	1.4	1.5	1.2	1.6	0.7	0.6	1.3	-999	1.3
	2006	2	19	50	1.5	1.8	2	1.6	2.7	1.5	0.9	1.7	-999	1.6
	2006	2	20	51	1.5	1.7	1.9	1.8	2.6	1.3	1.1	1.9	-999	1.6
	2006	2	21	52	1.5	1.7	1.9	1.7	2.3	1.1	1	1.7	-999	1.6
	2006	2	22	53	1.7	1.7	1.8	1.5	1.9	1.1	1.2	2.4	-999	1.9
	2006	2	23	54	1.7	1.7	1.9	1.7	2.2	1.2	1.1	2.3	-999	1.8
	2006	2	24	55	1.8	1.8	2	1.7	2.3	1.1	1	2.3	-999	2
	2006	2	25	56	2	2.1	2.4	2.3	3	1.7	1.6	2.6	-999	2.2
	2006	2	26	57	1.8	2.3	2.6	2.6	3.3	1.7	1.9	2.4	-999	2
	2006	2	27	58	2.6	2.9	3.3	3.2	4	2.7	2.7	2	-999	2.7
	2006	2	28	59	2.3	2.5	2.8	2.8	3.4	1.8	2.1	2.5	-999	2.3
	2006	3	1	60	2.1	2.3	2.5	2.8	2.9	1.5	2.3	2.4	-999	2.2
	2006	3	2	61	1.2	1.4	1.4	1.1	0.7	0.8	1.6	2.6	-999	1.3
	2006	3	3	62	1.7	2	2.1	2.1	2.3	1.3	1.8	2.3	-999	1.8
	2006	3	4	63	1.8	2.1	2.2	2.3	2.5	1.4	1.9	2.1	-999	1.9
	2006	3	5	64	1.7	1.8	1.9	2	2	1.1	1.6	1.9	-999	1.7
	2006	3	6	65	1.7	2.3	2.3	1.6	2.1	1.8	1.8	2.8	-999	1.9
	2006	3	7	66	2.3	2.7	3	2.4	3.8	2.7	1.9	3	-999	2.5
	2006	3	8	67	2.8	3.3	3.8	3.3	4.9	3.8	2.7	2.2	-999	2.9
	2006	3	9	68	2.6	2.9	3.5	2.5	3.9	3.2	2	2.2	-999	2.9
	2006	3	10	69	2.2	2.8	3.1	2.4	4.1	2.8	1.4	1.6	-999	2.4
	2006	3	11	70	1.8	2.1	2.3	1.7	2.1	1.7	1.4	2.3	-999	2.1
	2006	3	12	71	2.5	2.7	3.1	2.4	3.7	2.6	1.5	1.8	-999	2.8
	2006	3	13	72	2.4	2.5	2.8	3	3.1	1.3	1.8	3.4	-999	2.4
	2006	3	14	73	2.5	2.7	3	3.2	3.3	1.9	2.6	3.5	-999	2.6
	2006	3	15	74	2	2.4	2.5	2.1	2.4	2.2	2.3	2.3	-999	2.1
	2006	3	16	75	2.1	2.6	2.7	2.1	3	2.1	1.7	2.6	-999	2.3
	2006	3	17	76	2.3	3	3.1	2.3	3.7	2.9	1.9	2.3	-999	2.5
	2006	3	18	77	2.5	2.9	3.3	2.8	4.2	2.6	1.6	2.4	-999	2.6
	2006	3	19	78	2.4	2.9	3.3	3.1	3.7	2.1	1.7	1.6	-999	2.6
	2006	3	20	79	2.1	2.5	2.7	2.8	2.9	1.5	1.6	2.3	-999	2.2
	2006	3	21	80	2.3	2.6	2.9	2.5	3.2	2.2	1.5	2.8	-999	2.6
	2006	3	22	81	3.4	3.8	4.6	3.3	5.2	4	2.1	2.7	-999	3.8
	2006	3	23	82	1.7	1.8	1.9	1.2	0.8	1.1	1.9	3.1	-999	2
	2006	3	24	83	2.1	2.3	2.4	2.1	2.1	1.6	2.2	3.6	-999	2.4
	2006	3	25	84	2.4	2.4	2.6	1.9	1.8	2.2	2.7	3.3	-999	2.7
	2006	3	26	85	2.1	2.4	2.5	1.7	1.6	1.9	2.4	2.8	-999	2.5
	2006	3	27	86	3.5	4	4.5	3.8	6.2	4.1	2.1	3.1	-999	3.7
	2006	3	28	87	2.8	3.1	3.5	3.1	3.7	2.7	2.3	3.5	-999	3
	2006	3	29	88	3	3.4	3.8	3.1	4.3	3.3	2.1	3.5	-999	3.3
	2006	3	30	89	3	3.3	3.8	2.9	4.2	3.4	2.2	3.9	-999	3.3
	2006	3	31	90	3.8	4.1	5	4	5.4	4.3	2.8	3.8	-999	4.2
	2006	4	1	91	2.7	3.2	3.6	3.9	3.8	2	2.6	3.9	1.2	2.7
	2006	4	2	92	2	2.3	2.4	2	1.8	1.9	2.6	2	4.2	2.1
	2006	4	3	93	3.6	4.2	4.7	3.6	5.4	4.2	2.8	2.5	0.4	4
	2006	4	4	94	2.7	3.1	3.4	2.6	3.1	2.8	2.6	2.8	1.2	3
	2006	4	5	95	2.4	2.7	3	2.4	2.7	2.4	2.4	3.1	0.5	2.6
	2006	4	6	96	2.7	3.2	3.5	3	3.7	2.6	2.3	2.6	1.3	2.9
	2006	4	7	97	3.2	3.4	4	3.5	4.2	3	2.2	3.6	0.4	3.5
	2006	4	8	98	3.1	3.3	3.7	3.4	3.7	3	2.7	4.4	2.4	3.3
	2006	4	9	99	3.6	3.9	4.5	4.6	4.6	2.9	3.1	4.2	3.7	3.7
	2006	4	10	100	3.9	4.2	4.9	4.8	5	3.6	3.8	4.6	4.4	4.1
	2006	4	11	101	3.9	4.6	5.2	4.5	6.1	5.1	3.7	3.5	4.9	4.1
	2006	4	12	102	4	4.4	5.2	4.7	5.4	3.9	3.7	3.9	4.9	4.2
	2006	4	13	103	4.1	4.5	5.2	4.8	5.6	4.4	3.6	4.7	3.1	4.3
	2006	4	14	104	4.7	5.3	5.9	4.9	7.1	5.8	4.1	4.4	3.8	5.1
	2006	4	15	105	4.3	4.7	5.6	4.8	6	5.5	4.1	4.7	4.7	4.6
	2006	4	16	106	4.3	5	5.5	4.7	6.6	5.6	4.2	4	3.2	4.5
	2006	4	17	107	4.6	4.9	5.9	4.9	5.9	5.6	4.3	4.3	3	5
	2006	4	18	108	4.5	4.9	5.7	5.7	5.8	4.2	3.9	4	3.4	4.6
	2006	4	19	109	4.1	4.6	5.3	4.8	5.5	4.7	3.9	4.1	3.5	4.4
	2006	4	20	110	4	4.2	4.8	5.1	4.4	2.7	3.9	4.7	5.9	4
	2006	4	21	111	4.2	4.7	5.4	4.9	5.6	5	4.5	4.7	4.1	4.4
	2006	4	22	112	4.2	4.6	5.4	4.9	5.6	4.5	3.7	4.6	4.6	4.4
	2006	4	23	113	4	4.5	5.3	4.9	5.4	4.2	3.5	2.6	5	4.1
	2006	4	24	114	4.2	5.2	5.5	4.8	7.4	6.3	4.4	4.5	3.4	4.4
	2006	4	25	115	4.5	5.2	5.8	4.3	6.7	5.9	3.3	3.3	3.4	5.1
	2006	4	26	116	3.7	4.4	4.9	4.1	5.7	4.1	2.4	2.4	1.7	4
	2006	4	27	117	3.7	4.1	4.8	4.6	5.2	2.9	2.2	3.7	2.1	3.8
	2006	4	28	118	4.1	4.5	5.4	4.6	5.8	4.4	2.4	4.1	4	4.5
	2006	4	29	119	4.5	5	5.9	5.3	6.4	4.9	3.7	4.3	3.1	4.7
	2006	4	30	120	4.5	5	5.9	5.2	6.3	5.4	4.2	4.6	3.4	4.7
	2006	5	1	121	4.2	4.6	5.4	4.7	5.7	4.8	3.8	5.1	2.7	4.4
	2006	5	2	122	4.4	5	5.7	5	6.3	5.4	4	5	5.3	4.6
	2006	5	3	123	4.4	4.9	5.8	4.9	6.3	5	3.4	3.9	5.2	4.7
	2006	5	4	124	4.7	5	6	5	6.3	5.1	3.5	5.1	0.2	5.2
	2006	5	5	125	5.2	5.6	6.8	5.3	6.8	5.8	4.1	5	3.7	5.8
	2006	5	6	126	4.5	4.9	5.9	4.9	5.9	5.4	4.1	4.5	5.2	4.8
	2006	5	7	127	4.6	5.2	6	5	6.6	5.7	3.9	4.5	0.5	5
	2006	5	8	128	4.9	5.5	6.4	5.5	7.1	6.1	4.4	4.9	2.9	5.2
	2006	5	9	129	4.7	5.2	6	5.7	6.3	4.2	4.1	4.9	5.2	4.9
	2006	5	10	130	4.2	4.6	5.4	5.2	5.4	3.6	3.1	5.1	5.5	4.4
	2006	5	11	131	4.4	4.8	5.5	5.4	5.6	3.8	3.6	5.5	6.6	4.6
	2006	5	12	132	4.8	5.2	6	6.1	5.8	4	4.2	5.8	7.5	5
	2006	5	13	133	5.2	5.6	6.7	6	6.6	4.9	4.6	6.2	5.5	5.6
	2006	5	14	134	4.8	5.3	6.2	5.5	6.6	5.4	4	5.1	5.7	5
	2006	5	15	135	4.4	5.2	5.6	4.9	7.1	5.9	3.7	5.6	4.3	4.6
	2006	5	16	136	5.2	5.6	6.6	5.7	7.2	6.4	4.7	6.3	5.2	5.5
	2006	5	17	137	5	5.4	6.2	6.3	5.9	4.4	4.9	6.1	8.9	5.2
	2006	5	18	138	5.2	5.6	6.8	5.5	7.1	6.2	4	5.2	7.6	5.7
	2006	5	19	139	4.9	5.2	6.2	5.4	6.2	5.2	3.9	5.7	5.5	5.3
	2006	5	20	140	5.3	5.5	6.7	5.6	6.7	5.6	4.1	6.1	6.6	5.8
	2006	5	21	141	5.4	5.7	6.7	5.6	7	6.2	4.7	6.4	5.2	5.9
	2006	5	22	142	5	5.2	6.2	5	6.1	6.4	4.8	6.4	6.5	5.5
	2006	5	23	143	5.3	6	6.3	5.5	7.8	6.5	5.1	6.4	5.4	5.7
	2006	5	24	144	5.8	6	7.2	5.7	7.3	7.4	5.3	6.8	6.9	6.4
	2006	5	25	145	5.5	5.9	6.5	5.1	7.2	7	5.5	7	7.1	6.1
	2006	5	26	146	5.2	5.8	6.4	5.6	7.3	6.5	5.4	6.9	7.5	5.5
	2006	5	27	147	5.7	6.1	6.8	6.1	7.2	6.3	6.1	7.4	6.6	6.1
	2006	5	28	148	5.4	5.7	6.7	5.5	6.5	5.9	5.1	6.3	10	5.9
	2006	5	29	149	5.8	5.8	7	5.3	6.6	6.2	4.9	6.8	9.3	6.6
	2006	5	30	150	6.1	5.9	7.2	5.6	6.9	7.2	5.6	7.7	8.1	6.9
	2006	5	31	151	6.1	6.4	7.2	6	7.7	7.3	6.5	7.8	7.5	6.7
	2006	6	1	152	6	6.2	7.3	6.3	6.9	7.2	7.3	8.3	6.7	6.5
	2006	6	2	153	6.1	6	7.2	5.7	6.6	7.9	7.4	8.3	8.4	6.8
	2006	6	3	154	6.2	6.6	7.5	6.3	7.9	8.2	7.4	7.9	9.5	6.7
	2006	6	4	155	5.8	6.2	6.9	6.4	7.1	6.2	7.2	8.2	8	6.2
	2006	6	5	156	6.4	6.9	7.6	5.9	8.4	9.3	7.7	8.3	8	7.2
	2006	6	6	157	7.9	7.6	8.8	6.3	8.6	9.6	8	8.6	8	9.1
	2006	6	7	158	6.3	6.8	7.5	6.9	7.8	7.1	8.3	8.2	10.6	6.7
	2006	6	8	159	5.6	6	6.9	6.6	6.8	6.4	6.8	7.8	12	5.8
	2006	6	9	160	5.5	5.9	6.8	6.6	6.6	6.2	6.6	7.3	9.1	5.6
	2006	6	10	161	5.3	5.8	6.6	5.9	7	6.7	6.2	7.6	10.4	5.6
	2006	6	11	162	5.3	5.6	6.4	5.8	6.4	5.7	5.8	7.7	10.9	5.7
	2006	6	12	163	5.9	5.8	7	5.7	6.5	6.3	5.9	7.7	7.1	6.6
	2006	6	13	164	6.5	6.3	7.4	5.7	7.1	7.6	6.5	8.1	8.1	7.3
	2006	6	14	165	6.1	6.3	7.5	5.9	7.2	8.3	7	7.9	9.3	6.8
	2006	6	15	166	4.9	5.5	6.1	4.9	6.1	7	6.7	7.6	9.2	5.4
	2006	6	16	167	5.2	5.7	6	5	6.6	6.5	6.3	7.9	9.6	5.7
	2006	6	17	168	5.9	6.2	6.9	5.3	7.4	7.9	6.3	7.9	9.7	6.6
	2006	6	18	169	7.1	7	7.9	5.6	8	8.7	7	7.9	8.4	8.2
	2006	6	19	170	8.2	7.4	8.4	5.3	7.9	9.2	7.1	8.2	6.4	9.8
	2006	6	20	171	6.8	6.8	7.5	5.6	7.7	8.5	7.4	8.4	8.9	7.8
	2006	6	21	172	6.8	7	7.4	5.7	8.2	8.6	7.9	8.5	7.9	7.6
	2006	6	22	173	6.1	6.9	7.1	5.5	8.4	9.6	8.4	8.7	9.6	6.8
	2006	6	23	174	5.8	6.7	7.2	5.7	8.2	9.4	8.4	8	10.4	6.4
	2006	6	24	175	6.1	6.7	6.7	5.2	8.1	8.7	7.7	8.5	10.2	6.8
	2006	6	25	176	5.5	6.4	6.7	5.5	7.8	8.3	8	8.1	8.6	6
	2006	6	26	177	6.1	6.9	7	5.6	8.3	9.1	8.5	8.3	9.3	6.7
	2006	6	27	178	6.8	7.2	7.7	5.6	8.5	10	8.4	8.4	7.8	7.7
	2006	6	28	179	6.3	6.3	6.4	4	5.8	7.6	7.9	7.8	9.2	7.5
	2006	6	29	180	7.8	7.8	8.4	5.6	8.9	10.1	7.7	7.4	9	9.2
	2006	6	30	181	6	6.5	7.1	5.5	7.4	8.1	7.8	7.4	8.8	6.7
	2006	7	1	182	6.1	6.4	6.9	4.9	6.7	8.2	8	7.7	7.9	7
	2006	7	2	183	6.3	6.9	7.5	6	7.9	8.4	8.5	7.2	9.3	6.9
	2006	7	3	184	5.6	6.5	7	6	7.6	8	8.7	6.5	8.6	6
	2006	7	4	185	6.4	6.9	7.7	5.7	8	9.2	7.9	6.8	7.4	7.2
	2006	7	5	186	6.7	6.8	8	5.9	7.6	9.2	8	7.4	8.3	7.5
	2006	7	6	187	5.8	6.3	7	5.4	7.5	8.5	7.1	7.7	8.2	6.4
	2006	7	7	188	5.2	5.9	6.6	5.9	6.8	6.8	7.4	7.2	9.1	5.5
	2006	7	8	189	5.3	6.2	6.2	4.6	7.3	8.1	7.1	7.2	8.5	6
	2006	7	9	190	6.2	6.8	6.9	5	8.3	9.1	7.2	7.4	8.4	7
	2006	7	10	191	6.2	6.7	7.1	5.3	8.1	9.2	7.7	8.3	8.4	7
	2006	7	11	192	5.9	6.6	7.1	5.5	7.6	9.1	8.6	8.6	8.6	6.6
	2006	7	12	193	6	6.7	7	5.6	7.9	8.9	8.6	8.4	8.6	6.6
	2006	7	13	194	5.7	6.3	6.8	5.6	7.2	7.9	8.7	8.4	10	6.2
	2006	7	14	195	6.1	6.3	7.3	6.3	6.6	7.4	8.9	8.1	11.6	6.5
	2006	7	15	196	6.1	6.6	7.3	5.9	7.2	7.9	8.6	6.6	11.1	6.7
	2006	7	16	197	5.9	6.7	6.8	5.1	7.6	8.8	8.8	6.7	8.4	6.6
	2006	7	17	198	5	6	6	4.7	6.8	7.8	8.3	8.1	9.1	5.6
	2006	7	18	199	5.4	6.3	6.4	5.1	7.6	8.5	8.4	8.3	9.1	5.9
	2006	7	19	200	4.9	5.8	5.7	4.1	5.9	7.2	8.4	8.1	8.8	5.5
	2006	7	20	201	5.2	6	6.1	4.6	6.6	7.8	8.4	8.3	9.3	5.8
	2006	7	21	202	5.3	6.1	6.2	5.2	6.8	7.2	8.8	8.4	9.7	5.7
	2006	7	22	203	4.5	5.1	5.3	3.7	4.5	6.4	8.5	7.3	10.5	5
	2006	7	23	204	6.7	6.7	6.9	4.3	6.4	8.2	7.6	7.1	9.6	8
	2006	7	24	205	7.7	7.3	7.6	4.5	7.2	9	7.6	7.5	9.4	9.3
	2006	7	25	206	6.1	6.2	6.6	4.2	5.8	7.9	8.2	7.6	8.7	7.2
	2006	7	26	207	7	6.8	7.1	4.4	6.6	8.6	8.1	8	8	8.4
	2006	7	27	208	5.5	5.8	6.1	4.2	5.7	7.4	8	7.9	9.5	6.3
	2006	7	28	209	6.4	6.7	7	4.8	7.2	8.7	8	7.7	9.3	7.5
	2006	7	29	210	6.7	7	7.1	4.4	7.3	8.9	7.5	6.3	9.1	8
	2006	7	30	211	6.1	6.5	7	4.8	7.3	8.8	7.2	7	6.4	7
	2006	7	31	212	6	6.4	6.7	4.7	7.2	8.3	7.5	7.6	8.3	6.9
	2006	8	1	213	5.3	6.2	6.5	5	7.3	8.4	8.1	7.2	9.6	5.9
	2006	8	2	214	5.6	6	6.8	5.4	6.6	7.7	7.8	7.4	9.4	6.2
	2006	8	3	215	6.1	6.3	7	5.2	6.9	8.1	7.7	7.6	8.3	6.9
	2006	8	4	216	6.1	6.4	7.1	5.3	7.2	8.6	8.1	7.9	8	6.9
	2006	8	5	217	6.4	6.5	7.4	5.5	7	8.6	8.7	8.4	9.7	7.3
	2006	8	6	218	6.7	6.5	7.7	6.1	6.6	7.8	9.1	8.2	9.6	7.5
	2006	8	7	219	6.6	6.3	7.5	6	6.4	7.5	8.7	8.4	11	7.4
	2006	8	8	220	6.6	6.6	7.9	6.2	6.7	8.2	9.5	8	11	7.4
	2006	8	9	221	6	6.2	7.2	5.4	6.5	8.1	8.4	7.5	11.2	6.8
	2006	8	10	222	5.7	6	6.8	5.2	6.7	7.9	8	7.8	10.4	6.4
	2006	8	11	223	6.7	6.4	7.1	4.8	6.7	8.5	8	8.4	10.3	7.8
	2006	8	12	224	6.1	6.2	7	5.3	6.7	8.3	8.5	8.5	11	6.9
	2006	8	13	225	5.7	5.9	6.8	6.1	5.9	7.3	9.3	8.3	12.9	6.2
	2006	8	14	226	6.6	6.4	7.6	5.6	6.5	8.8	9.2	8.3	10.5	7.6
	2006	8	15	227	6.7	6.2	7.4	5.7	6.3	8.4	8.5	8.3	11.5	7.7
	2006	8	16	228	5.8	5.8	6.7	5.8	5.7	7.1	8.7	7.9	12.2	6.4
	2006	8	17	229	6.1	6.2	7.3	5.8	6.3	7.7	8.9	7.3	9.7	6.8
	2006	8	18	230	5.7	5.6	6.6	5.5	5.8	6.8	7.8	7.4	10.7	6.3
	2006	8	19	231	5.1	5.4	6.1	5.7	5.3	6	8.4	7.1	10.7	5.4
	2006	8	20	232	4.7	4.9	5.4	5.7	4.4	4.3	8.2	6.9	11.9	4.8
	2006	8	21	233	4.7	4.9	5.6	4.8	4.9	6.3	7.9	6.8	11	5.1
	2006	8	22	234	4.9	5.3	6	5.2	5.2	6.7	8.6	5.6	12.3	5.3
	2006	8	23	235	4.3	4.7	5.1	4.1	4.5	5.5	7.9	6.9	8.4	4.7
	2006	8	24	236	5	5.2	5.8	4.8	5.2	6	8	7.3	10.2	5.5
	2006	8	25	237	4.4	4.6	5.1	4.8	4.5	5.3	7.4	7	10.7	4.6
	2006	8	26	238	5.3	5.4	6.1	5.4	5.2	6.5	8.5	7.2	11.8	5.8
	2006	8	27	239	5.2	5.2	5.9	5.3	4.9	6	8.4	7.2	12.5	5.7
	2006	8	28	240	4.7	4.8	5.4	5	4.7	5.3	7.4	6.6	12.8	5
	2006	8	29	241	3.8	4	4.4	3.9	3.6	4.8	7.8	6.5	12.8	4.1
	2006	8	30	242	3.5	3.6	3.9	3.6	3.2	4.2	7	6.7	12.1	3.8
	2006	8	31	243	3.4	3.5	3.8	3.3	3	4.1	7.2	7.3	8.4	3.8
	2006	9	1	244	4.5	4.8	5.2	3.9	4.9	5.8	7	6.9	10.6	5.1
	2006	9	2	245	3.9	4.2	4.5	3.4	3.9	5	6.4	6.7	10.8	4.5
	2006	9	3	246	4.3	4.7	5.1	4	4.9	5.5	6.3	6.2	10.3	4.8
	2006	9	4	247	4.3	4.3	4.9	4.1	4.5	5.1	5.9	6.3	10.2	4.7
	2006	9	5	248	4.1	4.2	4.8	4	4.3	4.9	5.8	6.2	10.1	4.6
	2006	9	6	249	4.1	4.2	4.7	4.1	4.3	4.9	5.8	6	9.1	4.4
	2006	9	7	250	3.7	3.8	4.2	3.6	3.7	4.3	5.5	5.4	9	4.1
	2006	9	8	251	3.4	3.4	3.7	3.8	3.3	3.2	5.3	6	9.6	3.5
	2006	9	9	252	3.3	3.3	3.6	3.8	3.2	3.1	5.5	6	9.6	3.4
	2006	9	10	253	3.2	3.2	3.4	3.3	2.9	3.4	5.9	6.2	9.5	3.4
	2006	9	11	254	3.3	3.4	3.7	3.6	3.3	3.6	5.8	6.3	10.2	3.5
	2006	9	12	255	2.8	3	3.2	3.1	2.7	3.2	5.6	5.4	9.1	2.9
	2006	9	13	256	3.4	3.3	3.6	2.5	2.6	4.3	5.5	5.4	9.1	4
	2006	9	14	257	3.1	3.5	3.6	2.1	2.3	3.5	5.1	5.4	7.6	3.7
	2006	9	15	258	3	3.5	3.5	2.1	2.5	3.5	4.5	5	6.2	3.5
	2006	9	16	259	3.2	3.9	4	2.5	4	4.8	4.3	5.1	7.4	3.7
	2006	9	17	260	3.7	4.2	4.3	2.4	4.1	5	4.4	4.8	7.3	4.4
	2006	9	18	261	3.6	3.9	3.8	1.8	2.1	3.4	4.3	5.2	6.7	4.4
	2006	9	19	262	4.5	4.4	4.7	2.7	4.4	5.3	4.3	5.4	5.5	5.4
	2006	9	20	263	3.2	3.8	4	2.8	4.2	4.9	4.6	5.3	5.8	3.6
	2006	9	21	264	3.1	3.8	4	2.8	3.9	4.9	5.2	4.9	7.2	3.4
	2006	9	22	265	2.9	3.6	3.8	2.9	4	4.6	4.7	4.4	6.7	3.1
	2006	9	23	266	2.3	2.6	2.7	1.8	1.6	2.7	4.8	4.5	5.9	2.6
	2006	9	24	267	2	2.2	2.2	2	1.5	2.4	5	4.6	7.2	2.2
	2006	9	25	268	2.1	2.5	2.6	2.1	2	2.9	4.6	4.5	6.1	2.2
	2006	9	26	269	1.9	2.3	2.4	1.7	1.4	2.5	4.3	3.7	7.4	2.2
	2006	9	27	270	2.3	2.3	2.5	1.5	1.1	2.3	4.1	4.2	5.3	2.7
	2006	9	28	271	3	3.2	3.3	1.8	1.9	3.2	4.3	4.5	5.3	3.6
	2006	9	29	272	2.6	3.3	3.3	1.9	2.5	3.6	4.4	4.6	5.7	3
	2006	9	30	273	2.8	3.1	3.2	2	2.2	3.5	4.7	4.7	4.9	3.3
	2006	10	1	274	2.6	3	3.1	2	2.1	3.3	5.2	4	6.4	3
	2006	10	2	275	2.7	3.1	3.3	2.3	2.8	3.6	4.8	4.4	5.2	3
	2006	10	3	276	2.3	2.7	2.8	1.6	1.4	2.6	4.9	4.2	7.2	2.7
	2006	10	4	277	1.7	2.2	2.3	1.4	1	2	4	3.2	5.3	2
	2006	10	5	278	2	2.2	2.2	2	1.8	2.3	3.7	4.2	3.6	2.2
	2006	10	6	279	2.4	2.5	2.7	2.6	2.6	2.7	3.8	4.2	5.1	2.6
	2006	10	7	280	2.8	3	3.3	2.6	3.2	3.9	4.1	4.3	5.5	3.2
	2006	10	8	281	2.8	2.9	3.2	2.6	3.1	3.9	4.3	4.4	6.5	3.2
	2006	10	9	282	2.4	2.8	3.1	2.4	3	3.6	4.2	4.3	6.7	2.7
	2006	10	10	283	2.2	2.6	2.8	2.3	2.7	3.1	4.3	4	4.8	2.3
	2006	10	11	284	2	2.5	2.6	2.3	2.5	3	4.2	3.5	4.9	2.1
	2006	10	12	285	2.1	2.4	2.5	2.1	2.2	2.9	3.9	3.6	4.1	2.2
	2006	10	13	286	1.4	1.7	1.7	1.3	0.8	1.7	3.9	3.3	7	1.5
	2006	10	14	287	2.1	2.4	2.5	2.4	2.5	2.6	3.8	3.4	7.3	2.2
	2006	10	15	288	2.2	2.5	2.7	2.3	2.6	2.9	3.7	2.8	8	2.4
	2006	10	16	289	2	2.4	2.6	2	2.6	3	3.2	2.1	3	2.2
	2006	10	17	290	2	2.9	2.9	1.6	2.9	3.4	3.1	2	1.4	2.3
	2006	10	18	291	2	2.7	2.8	1.8	3.1	3.6	3.1	3	2.5	2.3
	2006	10	19	292	1.8	2.7	2.7	1.9	3	3.6	3.6	3.1	1.1	2
	2006	10	20	293	1.7	1.9	2	2	2	1.9	3.1	2.2	4.1	1.8
	2006	10	21	294	1.9	2.1	2.2	1.8	2.1	2.4	2.8	2.6	1	2.2
	2006	10	22	295	1.8	2.1	2.2	1.6	2.1	2.6	2.7	2.9	3.4	2
	2006	10	23	296	1.6	2.3	2.3	1.6	2.5	2.9	2.6	2.9	2.5	1.7
	2006	10	24	297	1.5	2.1	2.2	1.5	2.3	2.5	2.6	2.9	2.6	1.6
	2006	10	25	298	1.5	2.1	2.2	1.5	2.3	2.6	2.4	2.4	4.5	1.7
	2006	10	26	299	1.5	2.1	2.2	1.5	2.3	2.5	2.4	1.6	0.5	1.6
	2006	10	27	300	1.7	2.3	2.4	1.4	2.5	3	2.6	2.2	-999	1.9
	2006	10	28	301	1.5	2.2	2.3	1.4	2.3	2.7	2.8	1.9	-999	1.7
	2006	10	29	302	1.5	2.1	2.1	1.3	2.1	2.2	2.1	1.5	0.4	1.7
	2006	10	30	303	1.3	1.5	1.5	1.7	1.6	1.2	2.5	1.9	0.3	1.4
	2006	10	31	304	1.3	1.8	1.9	1.3	1.9	2.3	2.4	2.3	0.9	1.4
	2006	11	1	305	1.5	2.2	2.3	1.4	2.5	2.9	2.9	2	-999	1.7
	2006	11	2	306	1.3	1.8	1.9	1.3	1.9	2.3	2.3	1.6	-999	1.4
	2006	11	3	307	1.3	1.7	1.7	1.3	1.6	2	2.3	1.8	0.1	1.5
	2006	11	4	308	1.4	1.9	1.9	1.2	1.6	2.1	2.7	1.4	2.6	1.5
	2006	11	5	309	1.2	1.4	1.5	1.3	1.3	1.4	2.3	1.7	1.5	1.3
	2006	11	6	310	1.1	1.3	1.4	1	1.4	1.2	1.2	1.4	1	1.2
	2006	11	7	311	1	1.3	1.3	1.1	1.3	1	1.5	1.4	2.2	1.1
	2006	11	8	312	1	1.1	1.1	1.1	1.2	0.8	1.3	1.7	2.4	1
	2006	11	9	313	0.9	1	1	1.1	1.1	0.5	1.3	1.8	1.5	1
	2006	11	10	314	1.4	1.4	1.5	1	1.4	1.3	1.3	1.3	2.4	1.7
	2006	11	11	315	1.2	1.3	1.3	1	1.1	1.1	1.4	1.9	1.4	1.4
	2006	11	12	316	1.3	1.6	1.7	0.9	1.5	1.6	1.3	1.7	1.9	1.6
	2006	11	13	317	1.1	1.2	1.3	0.9	0.7	1	1.6	1.8	1.6	1.2
	2006	11	14	318	1	1.3	1.3	1.1	1.5	1.3	1.8	1.4	1.8	1
	2006	11	15	319	1	1.3	1.4	1	1.6	1.5	1.6	1.3	-999	1.1
	2006	11	16	320	0.9	1.1	1.2	0.9	1.3	1.1	1.3	1.2	1.7	1
	2006	11	17	321	0.8	1.1	1.1	0.8	1.1	1	1.2	1.6	-999	0.9
	2006	11	18	322	1	1.2	1.3	0.8	1.3	1.3	1.3	1.7	-999	1.2
	2006	11	19	323	0.7	0.9	0.9	0.8	0.8	0.4	1	1.4	-999	0.8
	2006	11	20	324	0.7	0.9	0.9	0.7	0.8	0.4	0.9	1.6	-999	0.8
	2006	11	21	325	0.8	1	1	0.8	1.3	0.5	0.9	1.5	-999	0.9
	2006	11	22	326	0.9	1.2	1.3	0.7	1.6	1	1	1.5	-999	1
	2006	11	23	327	0.9	1.4	1.5	0.6	1.7	1.5	1	1.5	-999	1.1
	2006	11	24	328	1.5	1.7	1.8	0.7	-0.1	0.3	1	1.5	-999	1.9
	2006	11	25	329	1.5	1.5	1.6	0.7	0.1	0.5	1	1.5	-999	1.8
	2006	11	26	330	0.9	1.4	1.4	0.6	1.3	1.2	1	1.6	-999	1.1
	2006	11	27	331	0.8	1.3	1.4	0.5	2	1.7	1	1.5	-999	1
	2006	11	28	332	1	1.1	1.2	0.7	1.1	0.7	1.1	1.6	-999	1.1
	2006	11	29	333	1.1	1.5	1.5	0.6	1.4	1.4	1.2	1.6	-999	1.4
	2006	11	30	334	0.8	1.2	1.3	0.5	1.9	1.5	1	1.5	-999	0.9
	2006	12	1	335	0.8	1.3	1.3	0.5	0.9	0.7	0.8	1.4	-999	1
	2006	12	2	336	1.2	1.5	1.5	0.6	0.7	0.8	1	1.4	-999	1.5
	2006	12	3	337	1.3	1.5	1.6	0.5	1.6	1.4	1	1.4	-999	1.6
	2006	12	4	338	0.6	0.9	1	0.5	1.9	0.6	0.7	1.2	-999	0.7
	2006	12	5	339	0.6	0.8	0.8	0.6	1.7	0.2	0.7	1.2	-999	0.7
	2006	12	6	340	0.7	0.9	1	0.5	1.8	0.5	0.6	1.1	-999	0.9
	2006	12	7	341	0.6	0.7	0.8	0.5	1.6	0.1	0.6	1.1	-999	0.7
	2006	12	8	342	0.7	0.9	1	0.5	1.7	0.7	0.7	1.2	-999	0.9
	2006	12	9	343	0.8	0.9	1	0.5	1.6	0.6	0.7	1.2	-999	1
	2006	12	10	344	0.7	0.8	0.9	0.5	1.3	0.2	0.6	1.2	-999	0.8
	2006	12	11	345	0.7	0.9	0.9	0.6	0.5	0.2	0.8	1.3	-999	0.8
	2006	12	12	346	0.7	0.8	0.9	0.5	1.7	0.4	0.8	1.3	-999	0.9
	2006	12	13	347	0.7	0.8	0.9	0.5	1.6	0.2	0.6	1.1	-999	0.8
	2006	12	14	348	0.6	0.7	0.8	0.5	1.4	0.1	0.6	1.1	-999	0.7
	2006	12	15	349	0.7	0.7	0.7	0.5	0.6	0.2	0.6	1.1	-999	0.8
	2006	12	16	350	0.9	1.1	1.1	0.6	0.6	0.5	1.3	1.2	-999	1
	2006	12	17	351	1	1.4	1.4	0.3	1.7	1.6	1.1	1.6	-999	1.3
	2006	12	18	352	1.1	1.1	1.3	0.3	2.2	1.6	0.8	1.4	-999	1.4
	2006	12	19	353	0.9	1.2	1.3	0	2.5	1.6	0.7	1.2	-999	1.2
	2006	12	20	354	1.4	1.3	1.5	0.2	2.4	1.7	0.8	1.3	-999	1.8
	2006	12	21	355	1.2	1.3	1.5	0.2	2.2	1.6	0.6	1.1	-999	1.6
	2006	12	22	356	0.7	1.2	1.3	0.2	2.1	1.6	0.9	0.9	-999	0.9
	2006	12	23	357	0.6	1.1	1.2	0.3	2	1.6	0.9	1	-999	0.8
	2006	12	24	358	0.7	1	1.1	0.3	1.6	0.9	0.6	1.2	-999	0.9
	2006	12	25	359	0.8	1.1	1.2	0.5	0.5	0.4	0.6	1.1	-999	1
	2006	12	26	360	0.7	1	1.2	0.2	2.1	1.2	0.6	0.6	-999	0.9
	2006	12	27	361	0.6	1	1.1	0.2	1.8	0.6	0.4	0.4	-999	0.7
	2006	12	28	362	0.7	1	1	0.3	1.4	0.4	0.3	0.6	-999	0.8
	2006	12	29	363	0.5	0.7	0.7	0.3	0.2	-0.7	0	0.5	-999	0.6
	2007	1	4	4	0.6	0.7	0.7	0.3	0.6	-0.8	0	0.4	-999	0.7
	2007	1	5	5	0.5	0.5	0.6	0.4	-0.1	-0.3	0.1	0.6	-999	0.6
	2007	1	7	7	0.4	0.5	0.5	0.5	0.2	-0.2	0.4	0.4	-999	0.4
	2007	1	8	8	0.7	0.9	0.9	0.5	0.7	0.1	0.3	0.6	-999	0.8
	2007	1	9	9	0.5	0.6	0.6	0.4	0.3	-0.4	0.1	0.3	-999	0.5
	2007	1	10	10	0.7	0.8	0.9	0.4	0.3	-0.3	0.1	0.3	-999	0.8
	2007	1	11	11	0.5	0.6	0.6	0.4	0.2	-0.6	0	0.2	-999	0.5
	2007	1	12	12	0.3	0.4	0.4	0.4	0.2	-0.7	0	0.3	-999	0.3
	2007	1	13	13	0.4	0.5	0.6	0.4	0.7	-0.7	0	0.6	-999	0.5
	2007	1	14	14	0.4	0.6	0.6	0.5	0.7	-0.6	0	0.6	-999	0.5
	2007	1	15	15	0.4	0.5	0.5	0.4	0.4	-0.6	0	0.5	-999	0.4
	2007	1	16	16	0.5	0.7	0.7	0.5	0.8	-0.2	0.2	0.7	-999	0.5
	2007	1	17	17	0.6	0.8	0.9	0.5	1.3	-0.2	0.2	0.8	-999	0.7
	2007	1	18	18	0.5	0.7	0.8	0.5	1	-0.4	0.1	0.7	-999	0.6
	2007	1	19	19	0.4	0.6	0.6	0.4	0.1	-0.4	0	0.5	-999	0.5
	2007	1	20	20	0.5	0.7	0.7	0.6	0.4	0	0.5	0.9	-999	0.6
	2007	1	21	21	0.7	0.8	0.8	0.9	1.3	0.2	0.8	0.9	-999	0.7
	2007	1	22	22	0.7	0.8	0.8	0.7	1.2	0	0.5	0.9	-999	0.7
	2007	1	23	23	0.7	0.8	0.8	0.7	1.1	0	0.4	0.9	-999	0.8
	2007	1	24	24	0.5	0.6	0.6	0.6	0.3	-0.2	0.3	0.7	-999	0.5
	2007	1	25	25	0.6	0.7	0.7	0.7	0.7	-0.2	0.4	0.9	-999	0.6
	2007	1	26	26	0.5	0.6	0.6	0.6	0.4	-0.3	0.2	0.7	-999	0.5
	2007	1	27	27	0.6	0.7	0.7	0.6	0.6	-0.1	0.4	0.8	-999	0.7
	2007	1	28	28	0.6	0.7	0.7	0.6	0.1	0	0.7	1.3	-999	0.7
	2007	1	29	29	1	1.3	1.3	0.8	0.8	0.6	0.9	1	-999	1.2
	2007	1	30	30	0.7	0.8	0.8	0.6	0.2	0	0.3	0.8	-999	0.8
	2007	1	31	31	0.8	1	1.1	0.9	1.6	-0.1	0.4	0.8	-999	0.9
	2007	2	1	32	0.6	0.7	0.8	0.8	1	-0.6	0.1	0.5	-999	0.6
	2007	2	2	33	0.6	0.8	0.8	0.7	0.8	-0.3	0.1	0.7	-999	0.7
	2007	2	3	34	0.5	0.6	0.6	0.7	0.4	-0.2	0.3	0.7	-999	0.6
	2007	2	4	35	0.7	0.8	0.8	0.9	0.8	0.2	0.8	1	-999	0.8
	2007	2	5	36	0.8	1	1	0.9	0.8	0.5	1	1.3	-999	0.9
	2007	2	6	37	0.7	0.8	0.8	0.7	0.2	0.2	1.1	1	-999	0.7
	2007	2	7	38	1	1.1	1.2	1.1	1.4	0.6	1	1.3	-999	1.1
	2007	2	8	39	1	1.1	1.2	1.2	1.6	0.3	0.8	1.5	-999	1.1
	2007	2	9	40	0.9	1.1	1.1	1	1.3	0.2	0.7	1.3	-999	1
	2007	2	10	41	1.3	1.5	1.7	1.3	2.1	1.1	1	1.6	-999	1.5
	2007	2	11	42	1.3	1.4	1.5	1.3	1.9	0.8	0.9	1.8	-999	1.5
	2007	2	12	43	1.3	1.6	1.7	1.2	2.2	1.1	0.9	1.8	-999	1.5
	2007	2	13	44	0.8	0.9	1	0.6	0	0.2	0.6	1	-999	0.9
	2007	2	14	45	1.1	1.3	1.3	1.1	1	0.8	1.1	1.3	-999	1.2
	2007	2	15	46	1	1.1	1.1	0.9	0.4	0.6	1.4	1.3	-999	1.1
	2007	2	16	47	1.3	1.5	1.6	1.5	1.7	1	1.5	1.3	-999	1.4
	2007	2	17	48	1.4	1.6	1.7	1.6	2.1	1.1	1.1	1.8	-999	1.5
	2007	2	18	49	1.4	1.6	1.7	1.8	2.2	0.9	1.3	1.7	-999	1.5
	2007	2	19	50	1.4	1.6	1.8	1.6	2.3	1.1	1	1.9	-999	1.5
	2007	2	20	51	1.2	1.3	1.4	1.4	1.5	0.6	1	2	-999	1.2
	2007	2	21	52	1.5	1.6	1.7	1.4	1.7	1.3	1.4	2	-999	1.6
	2007	2	22	53	1.8	1.9	2.1	1.6	2	1.7	1.8	1.9	-999	2
	2007	2	23	54	1.3	1.4	1.5	1.3	1.1	1	1.5	2.2	-999	1.5
	2007	2	24	55	2.1	2.3	2.6	2.1	2.8	2.5	2.1	1.8	-999	2.3
	2007	2	25	56	1.9	2.2	2.4	1.8	2.7	2.3	1.7	1.9	-999	2.2
	2007	2	26	57	2.3	2.3	2.8	1.8	3	1.9	0.9	1.9	-999	2.8
	2007	2	27	58	1.5	1.6	1.7	1.4	1.6	1	0.9	2.1	-999	1.7
	2007	2	28	59	1.5	1.6	1.7	1.6	1.8	1	1.3	1.5	-999	1.5
	2007	3	1	60	1.9	2.2	2.5	2.1	2.9	2.3	1.6	2.2	-999	2
	2007	3	2	61	1.5	1.8	1.8	1.4	1.6	1.4	1.5	2.6	-999	1.6
	2007	3	3	62	1.1	1.3	1.3	1	0.5	0.7	1.4	2.4	-999	1.2
	2007	3	4	63	1.2	1.4	1.5	1.1	0.7	1	1.9	1.4	-999	1.3
	2007	3	5	64	2.2	2.7	3	2.5	3.8	3.2	2.1	1.9	-999	2.3
	2007	3	6	65	2.1	2.7	2.9	2.1	4	3	1.6	1.7	-999	2.2
	2007	3	7	66	2.2	2.7	2.9	2.1	3.8	2.8	1.5	2.5	-999	2.4
	2007	3	8	67	2.2	2.6	2.9	2.4	3.7	2.6	1.6	2.7	-999	2.3
	2007	3	9	68	2.6	2.7	3.2	2.3	3.5	2.9	1.7	2.7	-999	3
	2007	3	10	69	2.2	2.6	2.8	2.2	3.4	2.4	1.6	2.8	-999	2.5
	2007	3	11	70	1.7	1.8	1.9	1.6	1.5	1.3	1.6	2.9	-999	1.9
	2007	3	12	71	1.9	2.1	2.2	1.8	1.9	1.6	1.8	2.8	-999	2.1
	2007	3	13	72	1.4	1.6	1.6	1.2	0.8	1.1	1.7	2.5	-999	1.6
	2007	3	14	73	1.9	2.1	2.2	1.7	1.7	1.9	2.1	2.4	-999	2.1
	2007	3	15	74	2.1	2.6	2.9	2.3	3.3	2.5	1.5	1.7	-999	2.2
	2007	3	16	75	2.3	2.8	3.1	2.4	4	2.6	1.4	1.7	-999	2.5
	2007	3	18	77	1.7	2.1	2.2	1.7	2.1	1.5	1	2.4	-999	1.9
	2007	3	19	78	2.5	2.8	3.3	2.6	3.5	2.9	1.9	2.4	-999	2.7
	2007	3	20	79	2.8	3.1	3.6	2.8	3.9	3.5	2.1	2.4	-999	3.1
	2007	3	21	80	2.2	2.4	2.7	2.1	2.4	2.4	2.1	2.7	-999	2.4
	2007	3	22	81	2.4	2.2	2.4	1.3	0.8	1.5	2.2	3.2	-999	2.9
	2007	3	23	82	3.1	3.5	4	3.2	4.6	3.5	2.3	3.2	-999	3.4
	2007	3	24	83	3.2	3.6	4.4	3	4.4	4.1	2.4	2	-999	3.7
	2007	3	25	84	3.2	3.5	4.2	3.2	4.6	3.8	2	2.7	-999	3.5
	2007	3	26	85	2.9	3.3	3.7	2.9	4.1	3.1	1.9	2.7	-999	3.2
	2007	3	27	86	2.4	2.8	3	2.3	3.1	2.2	1.9	3	-999	2.6
	2007	3	28	87	2.6	2.9	3.3	3.2	3.6	1.9	1.8	3.2	-999	2.8
	2007	3	29	88	2.7	3.1	3.5	2.9	3.9	2.7	1.7	2.8	-999	2.9
	2007	3	30	89	1.5	1.7	1.7	1.1	0.5	1	1.7	3	-999	1.7
	2007	3	31	90	2.8	2.9	3.3	2.5	3	2.6	2	3.5	-999	3.2
	2007	4	1	91	2.4	2.6	2.9	2	2.1	2.4	1.9	2.1	3.2	2.8
	2007	4	2	92	2.9	3.3	3.8	3.2	4	3.1	2.2	2.4	0.1	3.1
	2007	4	3	93	3	3.6	4	3.1	4.6	3.1	1.8	2	2.9	3.3
	2007	4	4	94	2.6	3.1	3.4	2.7	3.6	2.6	1.5	2.6	2.9	2.9
	2007	4	5	95	2.4	2.7	3	2.4	2.8	2.3	1.9	3.2	3.3	2.6
	2007	4	6	96	2.9	3.3	3.6	2.9	3.5	3.1	2.9	3.6	2.1	3.1
	2007	4	7	97	3.5	3.7	4.4	3.2	4.3	4.3	2.5	3.4	4.4	4.1
	2007	4	8	98	2.9	3.3	3.7	2.9	3.5	3.8	3	2.9	-999	3.2
	2007	4	9	99	2.6	2.9	3.3	3.1	3.2	2.4	2.4	3.5	3.2	2.8
	2007	4	10	100	2	2.2	2.3	2.1	1.8	1.9	2.7	3.1	3	2.1
	2007	4	11	101	2.7	3.2	3.5	2.9	3.6	3.2	2.6	3.1	2.4	2.9
	2007	4	12	102	3.5	4	4.7	3.9	5.2	4.1	2.5	3.1	2.5	3.8
	2007	4	13	103	3.3	3.7	4.3	3.7	4.8	3.9	2.3	3.3	1.5	3.5
	2007	4	14	104	3.5	3.9	4.4	3.3	4.8	4	2.4	3.6	1.2	3.9
	2007	4	15	105	2.6	3	3.3	2.8	3.2	2.8	2.1	3.4	3.4	2.9
	2007	4	16	106	2.8	3.3	3.6	3.1	3.9	2.7	2.1	2.5	1.8	3
	2007	4	17	107	1.9	2.1	2.2	2	1.6	1.6	2.2	3.1	3.5	2.2
	2007	4	18	108	2.5	2.8	3	2.6	2.5	2.7	3.2	3.8	1.6	2.8
	2007	4	19	109	3	3.5	4	4	4.1	2.1	1.9	2.3	3	3.1
	2007	4	20	110	3.1	3.5	4.1	4	4.4	2.4	1.7	3	2	3.2
	2007	4	21	111	2	2.2	2.3	2.1	1.9	1.6	1.8	3.4	0.2	2.1
	2007	4	22	112	2.8	3	3.3	3	3.2	2.5	2.2	4.3	2.8	3
	2007	4	23	113	4.1	4.6	5.5	4.7	6	5	2.6	3.8	2.7	4.4
	2007	4	24	114	3.4	4.3	4.4	3.9	5.9	4.5	2.6	3.2	2.3	3.6
	2007	4	25	115	3.1	3.2	3.3	2.1	2.4	2.7	2	3.9	1.5	3.7
	2007	4	26	116	4.1	4.6	5.2	4.1	6.2	4.8	2.4	4.3	3.6	4.6
	2007	4	27	117	2.6	3.1	3.4	2.7	3	3.2	2.7	3.2	3.8	2.9
	2007	4	28	118	4.2	4.3	5.2	4	5.2	5	2.8	4.7	1.5	4.7
	2007	4	29	119	3.7	4.2	4.9	3.8	5	5	3.2	4.5	1.9	4.1
	2007	4	30	120	3.3	3.9	4.5	3.5	4.4	4.5	3.3	3.2	0.8	3.5
	2007	5	1	121	3.2	3.6	4.1	3.2	3.9	4	3	4.6	2.7	3.5
	2007	5	2	122	3.2	3.6	4	3.2	3.8	4.1	3.6	5	3.2	3.4
	2007	5	3	123	4.4	4.9	5.7	4.4	6.2	5.8	3.3	4.6	2.5	4.9
	2007	5	4	124	4.7	5.2	6.3	4.7	6.5	6.3	3.7	4.1	1.8	5.3
	2007	5	5	125	6	6.2	7.6	5.3	7.6	7.6	4.7	5.1	1.4	6.8
	2007	5	6	126	5.1	5.3	6.4	5	6.5	6.8	4.6	5.7	2.5	5.6
	2007	5	7	127	3.5	3.7	4	2.9	3.2	4	4.6	5.8	4.3	4
	2007	5	8	128	4.3	4.7	5.4	4.2	5.3	5.9	5.1	6.2	3.4	4.7
	2007	5	9	129	3.7	4.1	4.6	3.7	4.3	4.3	4.3	4.4	4.5	4
	2007	5	10	130	3.1	3.1	3.4	2.7	2.5	3.3	4.5	5.1	4	3.5
	2007	5	11	131	3.5	3.9	4.3	3.8	3.9	4.2	4.8	4.6	2.2	3.7
	2007	5	12	132	4.2	4.7	5.4	5.4	5	4.1	4.9	4	2.6	4.4
	2007	5	13	133	5.1	5.6	6.7	5.4	6.5	6	4.8	5	1.5	5.7
	2007	5	14	134	5.1	5.7	6.7	5.7	7.1	6.6	5	5.2	5.3	5.4
	2007	5	15	135	4.7	5.3	5.7	5.4	6.7	5	4.7	5.8	5.7	4.8
	2007	5	16	136	4.4	4.8	5.5	4.7	5.5	5.5	5	6.2	3.7	4.8
	2007	5	17	137	4.1	4.5	5.1	4.4	4.8	5.3	5.1	6	6.4	4.4
	2007	5	18	138	5.3	5.7	6.8	5.4	6.8	6.6	4.8	5.6	6.7	5.9
	2007	5	19	139	5.3	5.8	7	5.7	7	7.1	5.1	4.9	5.2	5.7
	2007	5	20	140	5.8	5.9	7.2	5.4	7.1	7.5	5	6.2	4.9	6.5
	2007	5	21	141	4.6	4.7	5.3	4	4.7	5.6	5.5	6.6	4.7	5.2
	2007	5	22	142	5.4	5.5	6.6	5.1	6.3	7.3	5.9	7.2	4.7	6
	2007	5	23	143	4.5	5.3	5.5	4.2	5.7	6.4	6.1	6.6	5.4	5
	2007	5	24	144	4.9	4.9	5.6	3.9	4.4	6.5	7.3	7.2	6.2	5.7
	2007	5	25	145	4.2	4.7	5	3.3	3.8	5.5	7.7	5.7	7.6	4.8
	2007	5	26	146	5.4	6.3	6.9	5.7	7.5	8.3	7.9	7.1	4.5	5.9
	2007	5	27	147	5	5.7	6.4	5	6.5	7.2	6.3	5.3	4.9	5.5
	2007	5	28	148	6.4	6.4	7.7	5.6	7.3	8.5	6.8	7	6	7.3
	2007	5	29	149	5.9	5.5	6.6	4.3	5.6	6.9	5.3	6.6	6.9	7
	2007	5	30	150	4.2	3.8	4.1	2.6	2.5	4.3	5.5	6.9	4.5	5.1
	2007	5	31	151	3.9	3.9	4.1	2.5	2.5	4.2	5.9	6.8	3.6	4.6
	2007	6	1	152	3.5	3.4	3.6	2.4	2.1	3.8	5.8	7.2	4.2	4.1
	2007	6	2	153	3.5	3.4	3.6	2.3	2	4	6	6.1	5.9	4.1
	2007	6	3	154	2.6	2.6	2.7	1.2	0.2	2	5.5	6.7	6.1	3.1
	2007	6	4	155	2.9	3.1	3.1	2	1.5	3	5.9	7.3	5	3.4
	2007	6	5	156	3.1	3.2	3.2	1.7	1	2.7	6.1	7.3	5	3.7
	2007	6	6	157	5.4	4.3	4.4	2.2	1.9	4	6	8	5.3	6.7
	2007	6	7	158	3.2	3.3	3.4	1.8	1.2	3.2	6.7	8	7.2	3.8
	2007	6	8	159	2.1	2.4	2.5	1.7	1	2.8	6.1	7	8.1	2.4
	2007	6	9	160	2.2	2.5	2.6	1.8	1.1	3	6	6.7	8.4	2.4
	2007	6	10	161	2.5	2.9	2.9	1.9	1.4	3.2	6.4	6.7	5.9	2.8
	2007	6	11	162	3.7	3.7	3.9	2.8	2.6	4.3	6.5	7.6	6.4	4.2
	2007	6	12	163	4.6	4	4.4	2.6	2.5	4.5	6	6.9	7.8	5.6
	2007	6	13	164	4.1	3.6	3.8	2.1	1.7	3.7	6.2	7.1	7.3	4.9
	2007	6	14	165	4	3.6	3.8	2.6	2.3	4.2	7.1	8.7	4.6	4.7
	2007	6	15	166	3.8	4	4.2	3.2	3.2	4.7	7.1	8.6	7.8	4.3
	2007	6	16	167	4	4.3	4.3	2.9	3	4.7	7.5	8.7	8.2	4.6
	2007	6	17	168	3.1	3.2	3.3	1.5	0.7	2.9	8	8.2	8.5	3.8
	2007	6	18	169	4.9	4.4	4.5	2	1.5	4	8.2	7.9	6.9	6.1
	2007	6	19	170	6.4	5.9	6.1	3.2	3.7	6.3	8	6.4	6.8	7.8
	2007	6	20	171	5.1	4.9	5.2	3.1	3.5	5.5	6.7	7.5	5.8	6.1
	2007	6	21	172	5	5	5	2.9	3.3	5.4	7	7.8	6.4	6.1
	2007	6	22	173	3.3	3.8	3.8	2	1.4	3.4	7.1	7.2	8.5	3.9
	2007	6	23	174	3.6	4.3	4.3	2.6	2.6	4.7	8.2	7.2	8.3	4.1
	2007	6	24	175	3.6	4	3.9	2.1	1.6	3.5	7.3	8.1	6	4.3
	2007	6	25	176	3.3	4.2	4.1	2.4	2.1	4.6	9.2	6.8	8.5	3.8
	2007	6	26	177	3.1	3.5	3.5	1.5	0.5	2.7	7.3	7.8	9.1	3.7
	2007	6	27	178	4.2	4.4	4.3	2.2	1.9	4.2	8.2	7.7	9.1	5
	2007	6	28	179	4.8	4.6	4.6	1.8	1.1	3.6	8.3	8	7.4	6
	2007	6	29	180	6.8	6.2	6.2	3.5	4.6	6.7	7.9	8.5	7.1	8.3
	2007	6	30	181	4.8	5	5.2	3.5	4	5.8	8.6	8.2	9.1	5.5
	2007	7	1	182	4.5	4.5	4.6	2.8	2.9	4.8	7.8	7.9	9.6	5.3
	2007	7	2	183	3.9	3.8	3.9	2.1	1.6	3.7	7.4	8.3	8.4	4.6
	2007	7	3	184	3.2	3.8	3.8	2.4	2.2	4.2	7.6	7.5	8.2	3.7
	2007	7	4	185	4.5	4.3	4.4	2.3	2.1	4.5	8	8.1	7	5.5
	2007	7	5	186	4.4	3.6	3.9	1.5	0.7	3.3	8.3	8.3	8.1	5.5
	2007	7	6	187	4.3	4.5	4.7	3.1	3.2	5.4	8.4	8.4	7.1	4.9
	2007	7	7	188	4	4.7	5	3.8	4.1	6.3	9.2	8.1	7.5	4.4
	2007	7	8	189	4.2	5	4.9	3	3.5	5.4	8.8	8	7.6	4.9
	2007	7	9	190	5.3	5.9	5.9	3.5	4.8	7	9.3	7.4	8.9	6.2
	2007	7	10	191	5	5.5	5.6	3.7	4.7	6.6	8.7	8.2	8.1	5.8
	2007	7	11	192	4.6	5.1	5.3	3.7	4.4	6.3	8.4	8.5	8.7	5.2
	2007	7	12	193	3.1	3.4	3.5	1.4	0.4	2.8	8.6	8.4	8.3	3.7
	2007	7	13	194	3.7	4.1	4.2	2.5	2.3	4.7	8.7	8.9	8.2	4.4
	2007	7	14	195	3.6	3.2	3.5	1.7	1	3.6	8.7	8.3	10.6	4.4
	2007	7	15	196	4.8	4.9	5.2	3.2	3.6	6	8.4	7.4	8.8	5.6
	2007	7	17	198	3.8	4.7	4.7	3.6	4.6	5	6.4	5.6	6.4	4.2
	2007	7	19	200	4	4.9	4.8	3.3	3.9	5.3	8.5	6.1	8.5	4.5
	2007	7	20	201	3.9	4.8	4.8	3.1	3.6	5.5	8.6	6.8	9.1	4.5
	2007	7	21	202	3.8	4.7	4.6	3.1	3.6	5.4	8.2	7.6	7.5	4.3
	2007	7	22	203	3.7	4	4.1	2.5	2.3	4.5	8.1	7.8	8.2	4.3
	2007	7	23	204	6.7	6.7	6.8	3.9	5.3	7.9	10	7.1	8.5	8
	2007	7	24	205	7.4	6.9	6.9	3.7	5.2	7.8	9.2	7.9	9.1	9
	2007	7	25	206	6.4	6.5	7	4.4	6.1	8.7	9.3	7.8	8.5	7.6
	2007	7	26	207	6.3	6	6	3.1	3.9	6.6	9.1	8	7.7	7.7
	2007	7	27	208	5	5.4	5.5	3.4	4.1	6.5	9.2	7.8	9.2	5.9
	2007	7	29	210	6.2	5.8	5.6	2.7	3.2	5.8	8.5	8	8.3	7.6
	2007	7	30	211	4.5	4.2	4.3	1.8	1.2	3.7	8.3	8.2	9.3	5.6
	2007	8	1	213	5.1	5.8	6.1	4.4	6.2	7.9	8.7	8.5	7.9	5.7
	2007	8	2	214	5.7	5.9	6.7	4.9	6	8.3	9.2	8.3	9.2	6.4
	2007	8	3	215	6.1	6.3	7.1	4.8	6.4	8.8	9.2	7.7	9.6	7.1
	2007	8	4	216	5.7	6.2	6.8	4.8	6.3	8.5	9	7.2	8.9	6.5
	2007	8	5	217	5.8	5.9	6.7	4.4	5.7	8.3	8.5	7.6	8	6.8
	2007	8	6	218	6.5	6.1	7.2	4.5	5.6	8.6	8.8	7.4	8.8	7.6
	2007	8	7	219	5	4.4	4.8	2.8	2.8	5.3	8	7.2	8.5	6
	2007	8	8	220	5.1	4.6	5.2	3.1	3.3	6	8.3	7.4	9.1	6.1
	2007	8	9	221	4.2	3.7	3.9	2	1.5	4	8.2	7.9	8.3	5.1
	2007	8	10	222	4.3	4.4	4.6	2.8	2.8	5.3	8.8	7.8	8.4	5
	2007	8	11	223	6.1	6	6.6	4.4	5.7	7.5	8.6	8.1	8.6	7.1
	2007	8	12	224	5.8	6	6.8	5	6.3	8.1	8.7	7.7	9.1	6.5
	2007	8	13	225	4.8	4.9	5.6	4.3	4.6	7.1	8.7	7.6	8.1	5.4
	2007	8	14	226	5.3	4.8	5.4	3.4	3.8	6.3	7.8	7.5	8.5	6.3
	2007	8	15	227	6.1	5.6	6.7	4.6	5.4	8.3	8	7.2	7.4	7.2
	2007	8	16	228	5.7	5.6	6.6	4.8	5.7	8.2	7.8	7.1	9.4	6.5
	2007	8	17	229	4.9	4.7	5.3	3.3	3.7	6.1	7.6	6.2	6.3	5.7
	2007	8	18	230	3.7	3.1	3.4	1.7	1.1	3.3	6.6	6.4	8.1	4.5
	2007	8	19	231	5.2	5.7	6.6	5.4	6.2	8.1	7.8	6.4	6.5	5.6
	2007	8	20	232	4.8	5.1	6	4.7	5.5	7.2	7	6.4	8.5	5.4
	2007	8	21	233	5.3	5.6	6.6	5.3	6.3	7.8	6.9	6.7	6.6	5.8
	2007	8	22	234	5.1	5.5	6.4	4.9	5.8	7.9	7.6	6.1	7.4	5.7
	2007	8	23	235	4.2	4.6	5	3.8	4.5	5.7	7.2	6.6	7.5	4.7
	2007	8	24	236	5.5	5.9	6.8	5.3	6.6	7.6	7.6	6.1	8.9	6
	2007	8	25	237	4.9	5.3	6.1	5	5.8	7.8	7.4	6.9	9.1	5.3
	2007	8	26	238	3.1	2.9	3.1	1.5	0.9	3.3	7.8	5.8	8	3.7
	2007	8	27	239	4.9	4.7	5.4	3.8	4.4	6.6	6.8	6.2	7.7	5.7
	2007	8	28	240	4	3.9	4.3	2.9	3.1	5.3	6.7	6.2	8.9	4.7
	2007	8	29	241	4.8	5.2	6	4.7	5.7	7.6	6.8	6.4	9.1	5.3
	2007	8	30	242	4.9	5.3	6.2	5.3	6.1	7.3	6.8	6.4	7.7	5.3
	2007	8	31	243	4.5	4.8	5.5	4.5	5.2	6.3	6.6	6.7	7.4	4.9
	2007	9	1	244	4.4	4.8	5.2	3.5	4.5	6.2	7.2	6.7	8.2	5.1
	2007	9	2	245	4.4	4.8	5.3	3.8	4.8	6.4	7.4	6.8	6.8	5
	2007	9	3	246	5.1	5.5	6.2	4.5	6.1	7.9	7.7	6.8	7.3	5.7
	2007	9	4	247	4.6	4.6	5.3	4	4.5	6.3	7.3	6.7	7	5.2
	2007	9	5	248	4.9	4.9	5.8	4.2	5.2	7.3	6.8	6.7	8.2	5.6
	2007	9	6	249	3.8	3.6	4	2.8	2.8	5	7	6.7	7.6	4.4
	2007	9	7	250	5	4.8	5.6	4	4.9	7.1	6.9	7	6.7	5.8
	2007	9	8	251	5.4	5.7	6.8	5.4	6.9	8.7	6.8	6.4	6.2	6
	2007	9	9	252	4.8	5.1	6.1	4.8	6.4	7.6	5.6	5.6	7.1	5.3
	2007	9	10	253	4.2	4.7	5.5	4.3	5.7	7.1	5.4	5.3	6.4	4.7
	2007	9	11	254	3.6	4	4.5	3.4	4.3	5.7	5.1	5.6	6.9	4
	2007	9	12	255	3.9	4.4	5.1	4.1	5.2	6.5	5.6	5.6	7.4	4.2
	2007	9	13	256	3.5	3.4	3.7	2.4	2.5	4.4	5.6	5.5	7.7	4.1
	2007	9	14	257	3.7	4.1	4.3	2.6	3.7	5	5.5	5.6	5.7	4.3
	2007	9	15	258	4.6	5.2	5.5	4.3	7.5	7.1	5.1	5.6	5.5	5.1
	2007	9	16	259	4.4	5.2	5.4	4.2	8	7.3	5	5.4	5.1	4.9
	2007	9	19	262	5.5	5.6	6.1	5	8	6.3	4.9	5.6	5.7	6
	2007	9	20	263	4.2	4.8	5.2	4.2	7.1	6.6	4.8	5.6	5.3	4.5
	2007	9	21	264	2.8	3.2	3.3	2.5	2.9	3.4	4.9	5.6	5.2	3.1
	2007	9	22	265	4.2	4.9	5.5	4.5	7.5	7.1	4.8	5.6	4.6	4.5
	2007	9	23	266	3.3	3.6	4	3	3.8	4.7	5.2	5.6	5.5	3.7
	2007	9	24	267	4.2	4.8	5.5	4.7	6.2	7.1	5.6	5.5	5.5	4.5
	2007	9	26	269	3.3	3.8	4.4	3.5	4.8	5.5	4.5	4.6	5.9	3.6
	2007	9	27	270	3.7	3.9	4.5	3.3	4.6	5.7	4.6	5.1	5.5	4.2
	2007	9	28	271	3.8	4	4.3	2.9	4.5	5.1	4.8	5.2	4.9	4.3
	2007	9	29	272	3.7	4.6	4.9	3.6	7.5	7.4	4.8	4.8	4.2	4.1
	2007	9	30	273	4.3	5	5.7	4.2	7.5	8.1	5.3	4.7	4.8	4.7
	2007	10	1	274	4.4	5.2	6	4.4	7.9	8.7	5.3	4.4	5.5	4.9
	2007	10	2	275	4	4.6	5.2	4.2	6.8	6.7	4.8	4.7	5.2	4.4
	2007	10	3	276	2.9	3.2	3.4	2.5	3.2	3.6	4.5	4.5	5.5	3.2
	2007	10	4	277	3.4	4	4.4	3.4	5.4	5.6	4.7	4.7	5.4	3.7
	2007	10	5	278	2.7	3.4	3.8	2.9	4.3	5.1	3.8	2.6	4.8	3
	2007	10	6	279	2.5	2.8	3	2.1	2.6	3.8	3.9	3.6	4	2.8
	2007	10	7	280	3	3.4	3.8	2.8	4.2	5.1	3.8	3.8	4.9	3.4
	2007	10	8	281	3.6	4.2	4.9	3.7	6.3	7.2	4.1	3.9	4.3	4
	2007	10	9	282	3.2	4.2	4.9	3.7	6.9	7.6	4.2	4.1	3.9	3.5
	2007	10	10	283	3.1	4.2	4.9	3.8	7.3	7.6	4.1	3.7	4.1	3.4
	2007	10	11	284	3	4.1	4.7	3.8	6.9	7.3	4	3.7	2.3	3.1
	2007	10	12	285	3	3.7	4.3	3.4	5.6	6.6	4.2	4	4.4	3.2
	2007	10	13	286	2.9	3.7	4.2	3.2	5.2	6.4	4.6	3.7	4.8	3.2
	2007	10	14	287	3.8	4.8	5.6	4.5	7.2	8.9	5.6	3.5	5.2	4
	2007	10	15	288	3.6	4.2	5.1	3.8	7	7.9	4	3.1	4.8	4
	2007	10	16	289	3.3	4	4.7	3.6	6.7	7.2	3.8	3.3	3.9	3.6
	2007	10	17	290	2.3	3	3.1	1.8	4.4	4.2	2.6	3	3.7	2.6
	2007	10	18	291	2.4	3.1	3.4	2.4	5.6	4.9	2.7	3.3	3.7	2.7
	2007	10	19	292	2.1	2.7	2.9	2.3	4.3	3.4	2.6	3.3	2.6	2.3
	2007	10	20	293	2.2	2.7	3	2.2	3.5	4.1	3.2	2.4	3	2.4
	2007	10	21	294	2.6	2.6	3	1.9	2.9	3.9	3.2	3.2	2.8	3
	2007	10	23	296	2.1	3.1	3.4	2.5	5.8	5.8	3.3	3.3	2.9	2.3
	2007	10	24	297	2.2	3.2	3.7	2.7	6.2	6.3	3.5	3.3	3.5	2.4
	2007	10	25	298	2.3	3.1	3.5	2.5	5	5.6	3.7	3.5	3.3	2.5
	2007	10	26	299	2.2	3.2	3.5	2.4	5.1	6.2	4.2	3.3	3.4	2.4
	2007	10	27	300	2	2.7	2.8	1.8	3.7	4.1	3.2	3	3.6	2.2
	2007	10	28	301	1.8	2.6	2.8	1.7	4	4.4	3.1	2.8	3.5	2
	2007	10	29	302	2.1	2.7	3	1.8	4.9	4.9	2.7	3	3.6	2.4
	2007	10	30	303	2.5	2.6	3	1.8	3.6	4.4	2.7	2.8	4.1	3
	2007	10	31	304	1.7	2.4	2.6	1.9	4	4.3	2.6	1.8	2.4	1.8
	2007	11	1	305	1.4	2.1	2.1	1.2	2.2	2.6	2.2	2.6	-999	1.6
	2007	11	2	306	1.6	2.2	2.4	1.6	3.7	3.7	2.2	2.6	-999	1.8
	2007	11	3	307	1.9	2.5	3	2.1	5.4	5.4	2.4	2.4	-999	2.1
	2007	11	4	308	1.7	2.3	2.6	1.6	5.1	4.4	1.9	2.3	-999	1.9
	2007	11	5	309	1.8	2.1	2.4	1.8	4.1	3.5	1.8	2.5	-999	2
	2007	11	6	310	1.9	2.3	2.6	1.9	3.7	4	3.1	1.7	-999	2
	2007	11	7	311	2.1	2.6	3	2.3	4.4	4.4	3.3	1.9	-999	2.3
	2007	11	8	312	1.2	1.5	1.6	1.2	1.7	1.8	2	2	-999	1.3
	2007	11	9	313	1.3	1.6	1.7	1.5	2.2	1.9	2.2	1.7	-999	1.4
	2007	11	10	314	1.7	1.9	2.2	2	4.2	2.1	1.5	1.8	-999	1.9
	2007	11	11	315	2	2.3	2.8	2.2	5.2	3.7	2.1	1.7	-999	2.2
	2007	11	12	316	1.3	1.6	1.8	1	2.2	2	1.5	1.5	-999	1.5
	2007	11	13	317	1.2	1.5	1.7	1.1	3	2.2	1.1	1.7	-999	1.4
	2007	11	14	318	1.2	1.7	2	1.4	5.1	3	1.2	1.8	-999	1.3
	2007	11	15	319	1.4	1.8	2.1	1.5	4.8	3.5	1.7	1.9	-999	1.5
	2007	11	16	320	1	1.4	1.5	1.1	2	1.9	1.8	1.8	-999	1.1
	2007	11	17	321	1.4	1.7	2	1.7	4.8	3	1.6	2	-999	1.5
	2007	11	18	322	1.1	1.4	1.6	1	2.5	2.1	1.4	1.9	-999	1.3
	2007	11	19	323	1	1.5	1.8	1.1	4.4	3.5	1.4	1.8	-999	1.2
	2007	11	20	324	1.1	1.7	2	1.2	4.7	4.2	2.2	1.5	-999	1.2
	2007	11	21	325	1.1	1.6	1.7	1	3.8	2.6	1.8	1.1	-999	1.2
	2007	11	22	326	1	1.5	1.6	0.8	3.5	2.6	1.5	1.2	-999	1.1
	2007	11	23	327	0.9	1.4	1.4	0.8	3.1	1.8	1.4	1.2	-999	1
	2007	11	24	328	1.1	1.3	1.5	0.8	4.4	1.5	1	1.3	-999	1.3
	2007	11	25	329	1.1	1.2	1.4	0.8	4.2	1.3	0.9	1.4	-999	1.2
	2007	11	27	331	0.8	1	1.2	0.7	3.9	1	0.7	1.3	-999	0.8
	2007	11	28	332	0.9	1.1	1.3	0.6	2	1	0.8	1	-999	1
	2007	11	29	333	0.7	1.2	1.4	0.3	3.7	2.3	0.9	1.1	-999	0.9
	2007	11	30	334	0.6	1	1.1	0.4	2.8	1.2	0.6	1.2	-999	0.7
	2007	12	1	335	0.7	1.2	1.2	0.4	1.8	1	0.8	1.2	-999	0.8
	2007	12	2	336	0.8	1.2	1.3	0.4	3.1	1.8	1	0.9	-999	1
	2007	12	3	337	0.9	1.2	1.5	0.1	4.7	3	0.9	1.2	-999	1.3
	2007	12	4	338	0.5	0.9	1.1	0.3	4.6	2.4	0.9	1.3	-999	0.6
	2007	12	5	339	0.6	1	1.2	0.3	5.1	3.3	1	0.7	-999	0.7
	2007	12	6	340	1	1.2	1.4	0.9	4.7	2.1	1.5	1.3	-999	1.1
	2007	12	7	341	0.7	1.1	1.4	0.4	4.4	3.5	1.5	0.9	-999	0.9
	2007	12	8	342	0.6	1.1	1.3	0.3	3.9	3.3	1.3	1.1	-999	0.8
	2007	12	9	343	0.7	0.9	1.2	0.3	4.6	2.6	0.9	1.1	-999	0.9
	2007	12	10	344	0.7	0.9	1.1	0.6	4.2	1.1	1	1	-999	0.9
	2007	12	11	345	0.5	1	1.2	0.1	5.4	3.7	1.4	0.9	-999	0.7
	2007	12	12	346	0.9	1.2	1.5	0.5	3.5	2.9	1.6	1.1	-999	1.2
	2007	12	13	347	1	1.3	1.6	0.4	4.9	3.8	1.8	1.3	-999	1.3
	2007	12	14	348	0.8	1.2	1.4	0.3	4	3.4	1.5	1	-999	1
	2007	12	15	349	0.8	1	1.1	0.5	2.6	2	1.3	1.2	-999	0.9
	2007	12	16	350	0.8	1	1.2	0.4	2.1	1.1	0.9	0.9	-999	1
	2007	12	17	351	0.4	0.8	1	-0.1	4.6	2.2	0.9	0.9	-999	0.6
	2007	12	18	352	0.6	0.9	1.1	0.1	3.8	1.7	0.6	0.9	-999	0.8
	2007	12	19	353	0.5	0.8	0.9	-0.2	4.2	1.3	0.5	0.8	-999	0.7
	2007	12	20	354	0.9	1	1.2	0.1	3.2	1.2	0.5	0.9	-999	1.3
	2007	12	21	355	0.7	0.8	1.1	-0.1	4.3	1.5	0.4	0.8	-999	1
	2007	12	22	356	0.5	0.9	1	0.1	2.7	1	0.4	0.9	-999	0.7
	2007	12	23	357	0.4	0.7	0.8	0	3.5	1	0.4	1	-999	0.5
	2007	12	24	358	-999	-999	-999	-999	2.9	-999	0.4	1	-999	-999
	2007	12	25	359	0.5	0.8	0.9	0.2	2.2	0.5	0.4	1	-999	0.7
	2007	12	26	360	0.7	0.9	1	0.3	1.7	0.3	0.4	1	-999	0.8
	2007	12	27	361	0.5	0.7	0.8	0.1	3.6	0.4	0.3	0.9	-999	0.6
	2007	12	28	362	0.5	0.7	0.9	0.1	3.3	0.6	0.4	0.9	-999	0.7
	2008	1	1	1	0.4	0.6	0.6	0.4	0.6	-0.3	0.2	0.8	-999	0.5
	2008	1	2	2	0.5	0.7	0.7	0.5	0.6	0.1	0.6	0.9	-999	0.6
	2008	1	3	3	0.9	0.8	0.9	0.5	0.5	0.2	0.4	1	-999	1.1
	2008	1	4	4	0.7	1	1	0.5	0.5	0.3	0.7	0.9	-999	0.8
	2008	1	5	5	0.6	0.7	0.7	0.6	0.9	0.2	0.7	0.8	-999	0.6
	2008	1	7	7	0.4	0.5	0.5	0.5	0.2	-0.2	0.3	0.9	-999	0.5
	2008	1	8	8	0.5	0.7	0.7	0.4	0.6	-0.4	0.1	0.6	-999	0.6
	2008	1	9	9	0.4	0.6	0.6	0.4	0.6	-0.5	0.1	0.4	-999	0.5
	2008	1	10	10	0.6	0.7	0.8	0.4	0.8	-0.3	0.1	0.5	-999	0.8
	2008	1	11	11	0.7	0.8	0.9	0.5	1	-0.1	0.2	0.8	-999	0.9
	2008	1	12	12	0.5	0.5	0.5	0.5	0.6	-0.4	0.2	0.9	-999	0.5
	2008	1	13	13	0.5	0.6	0.6	0.5	0.8	-0.3	0.2	0.9	-999	0.6
	2008	1	14	14	0.6	0.7	0.7	0.5	0.7	-0.2	0.2	0.9	-999	0.7
	2008	1	15	15	0.9	0.8	0.8	0.5	0.5	-0.1	0.2	1	-999	1.1
	2008	1	16	16	0.9	0.8	0.9	0.5	0.8	0	0.2	0.9	-999	1.1
	2008	1	17	17	1	1	1.1	0.5	1	0.1	0.3	1	-999	1.2
	2008	1	18	18	0.9	0.9	1	0.5	0.8	0.1	0.3	1.1	-999	1.1
	2008	1	19	19	0.7	0.8	0.8	0.6	0.9	0.1	0.4	1.1	-999	0.8
	2008	1	20	20	0.6	0.7	0.7	0.6	0.9	-0.1	0.4	1.1	-999	0.7
	2008	1	21	21	0.6	0.6	0.6	0.6	0.7	-0.3	0.3	1.1	-999	0.6
	2008	1	22	22	0.8	0.8	0.8	0.6	0.7	0	0.4	1.2	-999	1
	2008	1	23	23	0.7	0.8	0.8	0.7	1	0.1	0.5	1	-999	0.8
	2008	1	24	24	0.8	0.8	0.8	0.7	0.9	0.1	0.5	1.3	-999	1
	2008	1	25	25	0.8	0.8	0.8	0.8	0.9	0.1	0.6	1.4	-999	0.9
	2008	1	26	26	0.7	0.8	0.8	0.8	1	0.1	0.5	1.2	-999	0.8
	2008	1	27	27	0.6	0.6	0.7	0.5	0	-0.1	0.5	1.2	-999	0.6
	2008	1	28	28	0.5	0.7	0.7	0.6	0	0.1	0.8	0.9	-999	0.6
	2008	1	29	29	1	1.3	1.4	0.9	1.3	0.9	1.2	1	-999	1.1
	2008	1	30	30	1	1.2	1.3	0.9	1.4	0.9	0.9	0.9	-999	1.2
	2008	1	31	31	0.9	1.1	1.1	1	1.4	0.4	0.8	1	-999	0.9
	2008	2	1	32	0.8	0.9	0.9	0.8	1	0	0.5	1.1	-999	0.8
	2008	2	2	33	0.8	0.9	1	0.8	1.2	0.2	0.4	1.1	-999	0.8
	2008	2	3	34	0.8	0.8	0.9	0.9	0.9	0	0.5	1.4	-999	0.8
	2008	2	4	35	0.9	0.9	1	1	1.2	0.1	0.5	1.4	-999	1
	2008	2	5	36	0.9	1	1	0.9	1.2	0.2	0.5	1.4	-999	0.9
	2008	2	6	37	0.9	1	1	1	1.1	0.2	0.6	1.6	-999	1
	2008	2	7	38	0.7	0.8	0.8	0.7	0.3	0.2	0.8	1.8	-999	0.8
	2008	2	8	39	0.9	1.1	1.1	1.1	1.3	0.4	0.8	1.2	-999	1
	2008	2	9	40	1.3	1.5	1.6	1.2	1.8	0.8	1.2	1.3	-999	1.4
	2008	2	10	41	1.1	1.2	1.2	1	1	0.7	1	1.6	-999	1.2
	2008	2	11	42	1	1.1	1.1	1	0.9	0.4	0.8	1.5	-999	1.1
	2008	2	12	43	1.3	1.6	1.6	1	1.2	1	1.1	0.9	-999	1.5
	2008	2	13	44	1.2	1.5	1.6	1.2	1.7	1.3	1.2	1.4	-999	1.4
	2008	2	14	45	1.2	1.5	1.6	1.4	2.1	1.1	1	1.2	-999	1.3
	2008	2	15	46	1	1.1	1.2	1.1	1.1	0.4	0.7	1.3	-999	1
	2008	2	16	47	0.7	0.8	0.8	0.7	0.3	0	0.6	1.5	-999	0.7
	2008	2	17	48	0.8	1	1	0.9	0.5	0.5	1.2	1.3	-999	0.9
	2008	2	18	49	1.4	1.6	1.7	1.8	1.9	1.1	1.8	1.7	-999	1.5
	2008	2	19	50	1.5	1.7	1.9	1.5	2.3	1	0.9	1.6	-999	1.6
	2008	2	20	51	1	1.2	1.3	1.3	1.6	0	0.4	1.2	-999	1.1
	2008	2	21	52	1.3	1.4	1.6	1.4	2	0.5	0.5	1.5	-999	1.4
	2008	2	22	53	1.3	1.4	1.6	1.4	1.9	0.5	0.6	1.8	-999	1.4
	2008	2	23	54	1	1.1	1.1	1	0.7	0.4	0.8	2	-999	1.1
	2008	2	24	55	1	1.1	1.1	1	0.7	0.4	0.8	1.8	-999	1
	2008	2	25	56	1.2	1.5	1.5	1.2	1.2	1.1	1.3	1.8	-999	1.3
	2008	2	26	57	1.7	2	2.2	1.8	2.7	1.8	1.4	1.4	-999	1.8
	2008	2	27	58	1.9	2.1	2.3	1.9	2.7	1.8	1.3	2.2	-999	2.1
	2008	2	28	59	1.7	1.8	2	1.8	2.2	1.3	1.4	2.4	-999	1.9
	2008	2	29	60	2.5	2.5	3	2	3	2.8	1.7	2.4	-999	3
	2008	3	1	60	2	2.3	2.6	2	2.9	2.4	1.9	2.3	-999	2.2
	2008	3	2	61	1.7	1.8	1.9	1.6	1.6	1.5	1.8	2.6	-999	1.9
	2008	3	3	62	2.2	2.5	2.9	2.3	3.3	2.4	1.6	1.7	-999	2.4
	2008	3	4	63	2.2	2.4	2.8	2.1	3.3	2.6	1.4	2.3	-999	2.5
	2008	3	5	64	1.9	2.5	2.6	1.9	3.5	2.4	1.4	2.9	-999	2.1
	2008	3	6	65	2.7	2.9	3.2	2.1	3.7	3.3	1.9	3	-999	3.2
	2008	3	7	66	2.2	2.5	2.8	2.2	3.2	2.7	2.1	3.2	-999	2.5
	2008	3	8	67	3.4	3	3.6	2.2	3.3	3.3	2.1	3.3	-999	4.1
	2008	3	9	68	2.6	2.5	2.6	1.4	1.4	2	2.5	3.3	-999	3.2
	2008	3	10	69	2.8	3.1	3.5	3	3.9	3.3	3.1	3.4	-999	3
	2008	3	11	70	2.8	3.2	3.6	2.8	3.7	3.3	3.1	2.7	-999	3.1
	2008	3	12	71	1.8	2	2.1	1.7	1.7	1.9	2.4	3.2	-999	2
	2008	3	13	72	1.7	2	2.1	1.7	1.8	1.9	1.9	2.5	-999	1.9
	2008	3	14	73	2.3	2.8	3.2	2.6	4	3	1.7	2.6	-999	2.5
	2008	3	15	74	2.4	3	3.3	2.4	4.1	2.9	1.6	2.2	-999	2.7
	2008	3	17	76	2.4	2.7	3	2.2	3.2	2.7	1.9	3.1	-999	2.7
	2008	3	18	77	3.2	3.2	3.8	2.7	3.9	3.5	2.1	3.4	-999	3.8
	2008	3	19	78	3.4	3.3	3.9	2.8	3.7	4	3	3.6	-999	3.9
	2008	3	20	79	2.5	2.5	2.7	1.9	2.1	2.5	2.5	3.6	-999	3
	2008	3	21	80	2.6	2.9	3.3	2.4	3.2	3	2.5	2.7	-999	2.9
	2008	3	22	81	3.4	3.6	4	3	4	4	3.6	4.1	-999	3.9
	2008	3	23	82	4.4	4.2	5.1	3.3	4.8	5.3	3.6	4.2	-999	5.2
	2008	3	24	83	3.7	3.7	4.3	3.4	4.4	4.7	3.8	5.1	-999	4.1
	2008	3	25	84	3.8	4.3	4.8	3.9	5.4	5.2	4.4	4.5	-999	4.1
	2008	3	26	85	3.3	3.9	4.2	3.5	5	4.1	3.4	3.9	-999	3.6
	2008	3	27	86	2.4	2.5	2.7	2.7	2.6	2	2.8	4.3	-999	2.5
	2008	3	28	87	2.9	3.2	3.6	2.9	3.7	3.2	2.6	3.8	-999	3.2
	2008	3	29	88	2.2	2.3	2.4	1.7	1.4	2	2.9	4.4	-999	2.6
	2008	3	30	89	3.8	4.2	4.8	3.9	5	5	4.3	4.7	-999	4.2
	2008	3	31	90	3.6	3.7	4.3	3.1	3.8	4.3	3.6	3.6	-999	4.2
	2008	4	1	91	3.1	3.5	4.1	3.4	4.4	3.4	2.2	2.9	2.2	3.4
	2008	4	2	92	3.3	3.6	4.1	3.1	4.5	3.2	2	3.3	2.2	3.7
	2008	4	3	93	3.3	3.5	4	3	4.3	3.3	2	3.7	2.4	3.8
	2008	4	4	94	2.9	3.3	3.7	3.1	3.9	3.4	2.8	3.3	2.1	3.1
	2008	4	5	95	2.5	2.8	3.1	2.5	3	2.4	2.1	3.7	2.2	2.8
	2008	4	6	96	2.9	3.2	3.6	2.8	3.4	3.7	3.2	4.3	1.4	3.2
	2008	4	7	97	3.4	3.9	4.5	3.6	4.6	4.7	3.2	2.9	2.6	3.7
	2008	4	8	98	3.3	3.6	4.1	3.9	4.4	3.1	2.6	4	0.9	3.4
	2008	4	9	99	2.5	2.9	3.1	2.9	2.9	2.5	2.7	3.3	3	2.7
	2008	4	10	100	3	3.5	3.9	3.2	4.1	3.4	2.6	3.7	3.2	3.3
	2008	4	11	101	2.8	3.3	3.6	3.1	3.5	3.4	3.4	3.8	1.5	3
	2008	4	12	102	3.6	3.9	4.5	3.6	4.6	4.5	3.3	4.3	4	4
	2008	4	13	103	3.9	4.2	4.6	3.5	4.9	4.7	3.7	5.3	3.8	4.4
	2008	4	14	104	5	4.6	5.4	3.9	4.8	5.6	4.7	5.8	2.3	5.9
	2008	4	15	105	4.6	4.4	4.8	3.4	4.1	4.4	4.7	6	3.1	5.4
	2008	4	16	106	4.9	5.2	6.1	5.7	5.8	5.4	5.8	5.2	7.4	5.1
	2008	4	17	107	3.4	3.6	4.1	3.7	4.1	3.7	3.3	4.4	6.8	3.6
	2008	4	18	108	3.3	3.7	4.2	4.1	4.1	2.8	3	4.4	5.6	3.5
	2008	4	19	109	4	4.2	5	4.5	5	4	3.4	4.9	5.2	4.3
	2008	4	20	110	3.8	4	4.7	4.2	4.8	3.9	3.3	5.1	7.3	4
	2008	4	21	111	3.9	4.2	4.8	4.4	4.9	4.2	4.1	5.7	7.5	4.1
	2008	4	22	112	4.1	4.6	5.3	4.7	5.4	5.6	5	6.2	4.2	4.4
	2008	4	23	113	4.8	5.3	5.7	4.2	6.3	6.8	5.9	6.7	4.8	5.4
	2008	4	24	114	4.5	5.2	5.6	4.3	6.3	7	5.8	6.6	6.9	5
	2008	4	25	115	4.8	5	5.5	3.8	4.9	6.2	6.5	6.7	6	5.5
	2008	4	26	116	4.3	4.5	5.1	3.8	4.3	5.9	6.7	6.5	8.8	4.8
	2008	4	27	117	5.3	5.7	6.8	5.3	6.6	7.9	6.4	5.6	12.4	5.9
	2008	4	28	118	4.8	5.2	6.1	4.7	6.2	6.9	5	6.2	7.4	5.3
	2008	4	29	119	4.4	4.9	5.8	4.5	6.1	6.1	3.7	4.4	5.9	4.8
	2008	4	30	120	4.4	4.8	5.8	4.5	6.1	6	3.7	5	1.7	4.9
	2008	5	1	121	4.5	4.8	5.6	4.4	5.9	5.7	3.5	5.4	3.9	5
	2008	5	2	122	5.1	5.1	6.1	4.2	5.9	6.2	3.8	5.3	5.5	6
	2008	5	3	123	4.9	5.4	6.5	4.8	6.5	6.8	4.3	4.2	5.8	5.5
	2008	5	4	124	5.2	5.5	6.5	4.8	6.6	6.5	4.2	5	3.4	5.8
	2008	5	5	125	4.8	4.8	5.8	4.3	5.6	6	4.3	6.1	3.8	5.5
	2008	5	6	126	4.1	4.7	5.4	4.3	5.6	5.4	3.9	4.3	5.3	4.5
	2008	5	7	127	3.7	4	4.5	3.5	4.6	4.2	2.7	4.6	6.8	4.1
	2008	5	8	128	3.8	4.1	4.8	3.6	4.6	4	2.7	4.2	5.8	4.4
	2008	5	9	129	3	3.5	3.9	3.5	3.8	3.4	3.2	3.3	5.7	3.2
	2008	5	10	130	3.6	4	4.6	4.2	4.8	3.7	2.8	4.1	7.4	3.7
	2008	5	11	131	3.3	3.6	4	4.1	3.7	2.9	3.8	4.8	5.6	3.4
	2008	5	12	132	4.1	4.5	5.2	4.5	5.3	4.4	3.4	4.9	5.2	4.4
	2008	5	13	133	4.9	5.2	6.3	4.8	6.1	5.8	3.9	5	5.3	5.5
	2008	5	14	134	3	3.3	3.4	2.6	2.6	2.7	3.7	5.6	5.7	3.4
	2008	5	15	135	4.3	4.7	5.5	4.6	5.7	5.1	3.7	5.5	6.1	4.7
	2008	5	16	136	3.9	4.3	4.9	4.3	4.8	4.9	4.2	5.3	3	4.2
	2008	5	17	137	3.5	3.9	4.3	3.6	4	4.3	4.5	5.8	4.4	3.7
	2008	5	18	138	4.7	5.2	6.2	5.3	6.4	6.2	4.7	4.7	5.7	4.9
	2008	5	19	139	4.5	4.9	5.7	4.7	5.9	5.9	4.4	5.8	3.9	4.8
	2008	5	20	140	4.7	5.3	6	5.1	6.5	6.3	4.8	6.3	5.7	5.1
	2008	5	21	141	5.2	5.5	6.5	5.3	6.6	7.2	5.4	6.9	6.5	5.7
	2008	5	22	142	5.5	6	6.4	5	7.5	7.5	5.6	7.2	7	6.2
	2008	5	23	143	6	6	7.2	5.4	7.1	8.1	6.2	7.6	7.8	6.8
	2008	5	24	144	6.9	6.8	7.6	5.4	7.8	8.5	6.7	7.7	6.9	8
	2008	5	25	145	4.6	5	5.4	3.9	4.8	5.9	6.3	6.7	7.5	5.2
	2008	5	26	146	5.1	5.8	6.6	5.4	7.3	7.4	5.6	6.1	8.1	5.6
	2008	5	27	147	5.2	5.8	6.7	5.6	7.2	7.2	5.4	6.1	7.2	5.6
	2008	5	28	148	5.8	6	7.2	5.4	7.2	7.8	5.5	6.5	7.1	6.5
	2008	5	29	149	5.6	6	7.2	5.8	7.5	8	5.6	7	6.5	6.1
	2008	5	30	150	5.5	6.2	7	5.6	7.9	8.1	5.7	5.9	6.5	6.1
	2008	5	31	151	5.3	5.6	6.6	5.3	6.7	6.9	5	6.8	8.3	5.8
	2008	6	1	152	5.3	5.6	6.7	5.5	6.8	7.4	5.5	7.7	8.4	5.8
	2008	6	2	153	5.6	6.2	7	5.8	7.6	8.1	6.9	7.7	8.4	6.1
	2008	6	3	154	5.5	6.2	6.9	6	7.8	7.4	6.2	6.7	11.5	5.8
	2008	6	4	155	5.2	5.9	6.4	5.3	7.1	6.9	6.1	6.5	8.4	5.7
	2008	6	5	156	6.3	6.3	7.2	5.3	7.6	8	5.4	7.5	7.7	7.2
	2008	6	6	157	5.1	5.9	6.5	5.4	7.2	7.7	6.5	7.7	7.8	5.5
	2008	6	7	158	5.3	6	7	6.1	7.1	7.6	6.6	6.9	9.3	5.6
	2008	6	8	159	5.1	5.8	6.7	5.7	6.7	7.7	6.6	6.3	10.1	5.4
	2008	6	9	160	5.8	6.3	7.4	5.9	7.4	8.4	6.9	6.9	9.2	6.4
	2008	6	10	161	6	5.9	7	5	6.2	7.5	6.6	7.2	9.3	6.9
	2008	6	11	162	6.5	6.6	8.3	5.9	7.7	8.9	6.3	6.4	9.6	7.4
	2008	6	12	163	5.6	6.2	7.3	5.7	7.5	7.8	5.6	5.1	8.5	6.1
	2008	6	13	164	5.5	5.9	7	5.9	7.2	7.1	5.5	6.8	5.6	6
	2008	6	14	165	5.5	6	6.8	5.7	7.2	7.2	6.2	7.4	6.5	6
	2008	6	15	166	6.2	6.6	7.1	5.5	7.9	8.1	6.6	7.6	7.2	7
	2008	6	16	167	6.3	6.7	7.5	6	8.1	8.3	6.8	7.4	7.9	7
	2008	6	17	168	6	6.6	7.2	5.8	8.2	8.5	6.7	7.7	8.5	6.7
	2008	6	18	169	7.2	7.4	8.4	6.1	8.9	9.9	7.6	7.6	7.8	8.3
	2008	6	19	170	7.7	8	9.1	6.3	9.3	11.2	8.7	7.1	8.7	8.9
	2008	6	20	171	7.3	7.3	7.9	5.4	8.6	10.1	7.5	8.2	8.7	8.6
	2008	6	21	172	8.2	8.2	8.8	5.8	9.4	10.8	8	7.6	9.2	9.7
	2008	6	22	173	6.9	7.5	8.1	5.9	9	10.2	8.1	6.6	8.9	7.8
	2008	6	23	174	5.4	6.5	6.5	5.6	8.5	8.3	7.3	7.2	9.1	5.8
	2008	6	24	175	6.5	7.1	7.6	5.6	8.7	9.9	7.8	7.1	8.4	7.4
	2008	6	25	176	8.1	8	8.5	5.7	9.2	10.4	7.9	7.9	8.5	9.6
	2008	6	26	177	7.1	7.4	7.9	5.9	8.8	9.8	8.4	8.5	9.4	8
	2008	6	27	178	6.4	7.1	7.3	5.5	8.4	9.6	8.7	8.4	9	7.2
	2008	6	28	179	6.1	6.9	7.2	5.9	8.7	9.3	8.2	8.4	9.2	6.6
	2008	6	29	180	7.1	7.3	8	6.2	8.6	9.2	8.1	8.4	11	8
	2008	6	30	181	7	7.3	8.1	6.2	8.6	9.3	8.1	8	9.8	7.9
	2008	7	1	182	7.2	7.6	8.5	6.4	9.1	10.2	8.4	7.2	9.3	8.1
	2008	7	2	183	7.9	7.6	8.7	5.9	8.8	10	7.2	8	9.3	9.3
	2008	7	3	184	8.2	7.8	9.1	6.1	9.3	10.7	7.3	8.2	9.2	9.7
	2008	7	4	185	7.2	7.3	8.8	6.1	8.5	10.4	7.4	7.2	9.6	8.2
	2008	7	5	186	7.6	7.2	8.4	5.8	8.4	9.4	6.9	8	9.2	8.8
	2008	7	6	187	7	7.1	8.4	6.3	8.5	9.8	7.4	8.1	10.1	8
	2008	7	7	188	6	7	7	5.8	9.3	9.2	7.7	7.6	7.4	6.6
	2008	7	8	189	6.8	7.3	7.5	5.3	8.9	9.8	7.5	6.9	8.4	7.8
	2008	7	9	190	8	8	8.6	5.6	9	10.2	7.6	7.1	10	9.5
	2008	7	10	191	7.6	7.5	8.4	5.8	8.7	10.1	7.9	8.1	10	8.8
	2008	7	11	192	7.1	7.2	7.7	5.6	8.5	9.5	7.7	8.7	7.7	8.2
	2008	7	12	193	7.3	7.3	8.1	5.8	8.6	10.3	8.4	8.7	8.2	8.4
	2008	7	13	194	6.9	7.1	8.5	6.4	7.9	10.3	9.2	8.5	9.4	7.7
	2008	7	14	195	7.2	7.5	8.6	6.2	8.7	10.7	8.9	8	9.2	8.2
	2008	7	16	197	6	6.8	6.8	5.6	8	8.1	8.6	7.7	8.4	6.7
	2008	7	17	198	6.4	6.8	7	5.7	8	8	8.4	8.6	7.7	7
	2008	7	18	199	6.5	7.1	7.2	5.6	8.6	8.9	8.5	7.5	8.6	7.3
	2008	7	19	200	6.8	7.2	7.5	5.5	8.5	9.7	8.6	8.6	8.9	7.8
	2008	7	20	201	6.9	7	7.3	5.2	8	9.3	8.4	8.9	7.9	7.9
	2008	7	21	202	6.9	7.1	7.9	5.9	8.2	9.9	9	8.8	8.5	7.8
	2008	7	22	203	6.2	6.9	7.1	5.3	7.9	9.3	9.1	7.6	8.7	6.9
	2008	7	23	204	6.3	6.6	6.8	4.6	6.9	8.6	8.7	8	8.3	7.3
	2008	7	24	205	6.5	7	7.6	5.4	8	10	9.1	8.2	8.5	7.4
	2008	7	25	206	6.2	7	7.3	5.4	8.3	10.2	9.7	8	8.7	6.9
	2008	7	26	207	6.9	7.2	7.8	5.4	8.3	10	8.5	8	8.5	8
	2008	7	27	208	5.6	6.6	6.9	5.1	7.9	9.5	8.4	7.5	9.1	6.3
	2008	7	28	209	5.6	6.4	6.5	4.8	7.9	8.9	7.7	7.9	8.3	6.3
	2008	7	29	210	6	6.5	7	5	7.4	9.1	8.2	8.1	8.3	6.8
	2008	7	30	211	5.8	6.6	6.9	5.1	8.1	9.6	8.2	8.6	7.9	6.6
	2008	7	31	212	6.9	7	7.5	5.2	7.9	9.6	8.6	8.2	7.8	7.9
	2008	8	1	213	6.7	6.7	7.9	5.7	7.3	9.6	8.9	8.6	8.8	7.7
	2008	8	2	214	5.9	6.5	7.3	5.6	7.5	9.4	9.1	8.3	9.1	6.5
	2008	8	3	215	5.3	6.1	6.7	5.3	7	8.5	8.6	8.1	9.3	5.8
	2008	8	4	216	5.1	6.1	6.8	5.4	7	9	8.9	8.3	9.6	5.6
	2008	8	5	217	5.6	5.8	6.8	5.2	6.6	8.3	7.4	8.7	9.3	6.3
	2008	8	6	218	6.7	6.5	7.9	5.5	6.8	9.2	8.8	7.4	9.3	7.7
	2008	8	7	219	6.3	6	7.1	4.7	5.8	8.4	8.4	7.5	10.1	7.4
	2008	8	8	220	6	6.1	7	4.7	5.8	8.5	9	6.8	9.3	6.9
	2008	8	9	221	6.1	6.3	7.2	5.1	7.1	8.8	7.9	7.4	8.9	6.9
	2008	8	10	222	6.5	6.6	7.4	5.2	7	8.6	8.4	7.1	8.5	7.5
	2008	8	11	223	5.5	6.2	7	5.6	7.2	8.3	8	7	8.3	6.1
	2008	8	12	224	5	5.8	6.7	5.8	6.7	8.3	7.8	7.6	8.5	5.3
	2008	8	13	225	5.5	6	7	5.5	6.8	8.7	8	7.4	8.7	6
	2008	8	14	226	5	5.6	6.5	5.3	6.1	8.4	8.2	7	9	5.4
	2008	8	15	227	4.7	5.3	6.1	4.9	5.7	7.8	7.9	7.2	9.3	5.2
	2008	8	16	228	5.3	6	7	5.4	6.6	8.8	8.7	6	10.6	5.8
	2008	8	17	229	5.4	5.8	6.9	5.4	6.6	8.5	7.6	6.9	10.6	6
	2008	8	18	230	5	5.4	6.3	5.1	5.9	7.6	7.6	7.5	10	5.5
	2008	8	19	231	5.7	5.6	6.6	5.1	5.9	8.1	7.9	7.6	10.1	6.5
	2008	8	20	232	5.4	5	5.8	4.2	4.7	7.1	7.9	7.4	9.2	6.2
	2008	8	21	233	5.8	5.5	6.5	4.7	5.4	8	8.4	7.9	9.4	6.7
	2008	8	22	234	4.1	4.7	5.1	3.9	4.4	6	8.5	6.8	9.4	4.5
	2008	8	23	235	3.5	3.6	3.8	2.4	2.1	4.2	8.8	6.8	10.7	4
	2008	8	24	236	4.5	4.8	5.5	4.1	4.6	6.9	7.6	5.3	9.2	5.1
	2008	8	25	237	4.3	4.8	5.4	4.3	4.8	6.9	7.5	5.7	5.8	4.7
[truncated: 3,408 more rows]

## Sheet: 10 Years ave. ETo-PM.
					PM ETo values
	MON	DAY	DOY	2008	2009	2010	2011	2012	2013	2014	2015	2016	2017	Average
	1	1	1	0.4	0.4	0.8	0.8	0.6	0.6	0.4	0.6	0.4	0.7	0.57
	1	2	2	0.5	0.3	0.9	0.8	0.5	0.7	0.4	0.7	0.5	0.7	0.6
	1	3	3	0.9	0.3	0.8	0.7	0.5	1.1	0.6	0.6	0.4	0.9	0.68
	1	4	4	0.7	0.4	1.1	0.8	1.4	0.8	0.3	1.1	0.4	0.7	0.77
	1	5	5	0.6	0.4	0.5	0.5	1.1	0.5	0.3	0.8	0.4	0.7	0.58
	1	6	6	0.4	0.7	0.8	0.8	0.6	0.7	0.6	0.7	0.4	0.9	0.66
	1	7	7	0.5	0.6	0.5	0.6	0.6	0.6	0.6	0.6	0.8	0.5	0.59
	1	8	8	0.4	0.7	1	1	0.6	0.7	1	0.6	0.8	1.2	0.8
	1	9	9	0.6	0.7	1	1	0.6	0.5	1	0.4	0.9	1.1	0.78
	1	10	10	0.7	0.8	1.2	1.2	0.7	0.5	1.1	0.4	0.6	0.9	0.81
	1	11	11	0.5	0.7	1.1	0.8	0.8	0.4	0.9	0.5	0.8	0.8	0.73
	1	12	12	0.5	0.7	1	0.9	0.6	0.5	0.9	0.5	0.5	0.8	0.69
	1	13	13	0.6	0.6	0.7	0.6	0.6	0.6	0.5	0.5	0.7	0.7	0.61
	1	14	14	0.9	0.8	0.8	0.6	0.6	0.5	0.6	0.6	0.6	0.6	0.66
	1	15	15	0.9	1	0.8	0.6	0.7	0.5	0.6	0.5	0.6	0.5	0.67
	1	16	16	1	1.2	0.8	0.7	1	0.6	0.5	0.6	0.7	0.5	0.76
	1	17	17	0.9	1.3	0.9	0.7	0.8	0.7	0.6	0.5	0.7	0.7	0.78
	1	18	18	0.7	1.1	0.9	0.7	0.6	0.7	0.8	0.5	0.6	0.7	0.73
	1	19	19	0.6	0.6	0.6	0.6	0.5	0.7	0.8	0.6	0.5	0.8	0.63
	1	20	20	0.6	0.6	0.5	0.6	0.8	0.6	0.8	0.9	0.8	0.7	0.69
	1	21	21	0.8	0.6	0.9	0.6	0.9	0.7	1	0.9	0.7	0.8	0.79
	1	22	22	0.7	1.6	0.9	0.9	0.6	0.8	0.7	0.7	0.7	0.9	0.85
	1	23	23	0.8	0.9	0.8	1	0.6	1.1	0.9	0.7	0.8	1.2	0.88
	1	24	24	0.8	1	0.8	0.8	0.6	0.8	0.7	0.8	0.6	0.9	0.78
	1	25	25	0.7	0.8	0.7	0.9	0.5	0.7	0.7	0.8	0.6	0.7	0.71
	1	26	26	0.6	1	0.6	0.8	0.7	0.8	0.8	0.9	0.7	0.7	0.76
	1	27	27	0.5	0.7	0.7	1	0.6	1.1	1	0.7	0.9	0.9	0.81
	1	28	28	1	0.5	0.5	0.6	0.7	0.8	0.9	0.5	1	0.5	0.7
	1	29	29	1	1.1	1.1	1	1.1	1.4	0.9	0.9	1.1	0.7	1.03
	1	30	30	0.9	0.8	0.8	0.8	0.8	1.1	1.3	0.9	1.2	0.4	0.9
	1	31	31	0.8	1.3	1.5	1.4	0.9	1.2	1.5	1	0.9	0.6	1.11
	2	1	32	0.8	0.9	1	0.8	0.8	0.9	1.1	1.1	0.5	0.7	0.86
	2	2	33	0.8	0.8	0.4	0.7	1.1	0.8	1	1.3	0.9	0.6	0.84
	2	3	34	0.9	0.7	0.5	0.7	1.2	0.9	1.1	1.7	1.1	0.7	0.95
	2	4	35	0.9	0.8	1	0.7	1.1	1.2	0.9	1.2	1	0.6	0.94
	2	5	36	0.9	0.9	0.7	0.7	1.1	0.9	1	1.2	1	0.7	0.91
	2	6	37	0.7	1	0.5	0.8	1.3	1	1.4	1.4	0.8	0.8	0.97
	2	7	38	0.9	1	0.8	1.1	0.6	0.8	1.4	1.1	0.8	0.8	0.93
	2	8	39	1.3	1.5	0.7	1	1	0.8	1.1	1.2	1.1	0.6	1.03
	2	9	40	1.1	1.7	1	1	1.1	1.3	1.3	1.2	1.2	0.7	1.16
	2	10	41	1	1.2	1.1	1.1	0.9	1.2	1.5	1	1.6	0.8	1.14
	2	11	42	1.3	1.3	1.4	1.2	0.9	1.1	1.9	1.1	1.2	0.9	1.23
	2	12	43	1.2	1.2	1.2	0.9	1	1.2	1.4	1	1.1	0.8	1.1
	2	13	44	1.2	1.2	0.8	0.7	1.2	1.1	1.7	1.3	1.2	1	1.14
	2	14	45	1	1.4	1.1	0.7	1.5	1.3	1.6	1.3	1.3	1	1.22
	2	15	46	0.7	1.1	1	1	1.7	1.8	1.6	1.3	2	1.2	1.34
	2	16	47	0.8	1	1.7	0.8	0.9	1.6	0.9	0.8	2.1	0.9	1.15
	2	17	48	1.4	0.9	1.7	0.8	0.8	1.4	1.3	0.9	2	1	1.22
	2	18	49	1.5	1.2	1.6	1.1	1.1	1.3	1.6	1.4	1.7	1.3	1.38
	2	19	50	1	1.6	1.7	1.4	1.2	1.4	1.6	1.4	1.7	1.2	1.42
	2	20	51	1.3	1.7	1.5	1.7	1.2	1.3	1.7	1.3	1.5	1.4	1.46
	2	21	52	1.3	1.5	1.4	1.5	1.4	1.3	2	1.4	2.4	1.6	1.58
	2	22	53	1	1.4	1.9	1.6	1.5	1.9	2.7	1.8	1.8	2.5	1.81
	2	23	54	1	1	1.6	1.8	1.1	1.7	2.4	1.3	2.1	2	1.6
	2	24	55	1.2	1	1.7	1.4	1	2	2.6	1.1	1.9	2.1	1.6
	2	25	56	1.7	1.1	1.5	1.3	1.1	2	2.4	1.1	2.8	2	1.7
	2	26	57	1.9	1.5	1.1	1.2	1.4	3	3.1	1.6	2.1	3	1.99
	2	27	58	1.7	1.7	1.3	1.5	1.7	1.9	1.5	1.9	1.9	2.2	1.73
	2	28	59	2.5	1.3	1.5	1.4	2	1.8	1.6	1.5	1.3	1.9	1.68
	3	1	60	2	1.3	1.4	1.4	1.9	1.6	1.6	2	1.9	1.9	1.7
	3	2	61	1.7	1.6	1.5	1.5	1.3	1.5	1.7	1.8	1.9	1.7	1.62
	3	3	62	2.2	1.1	1.4	1.4	1.1	1.6	1.9	1.7	2.2	1.5	1.61
	3	4	63	2.2	1.6	1.7	1.3	1.6	2.1	1.9	2	1.9	1.6	1.79
	3	5	64	1.9	1.7	1.4	1.5	1.5	1.5	2	2.3	2.1	1.9	1.78
	3	6	65	2.7	1.8	2.1	1.8	1.5	1.7	2.1	2.7	1.8	1.9	2.01
	3	7	66	2.2	2.5	2.2	1.8	1.3	1.8	2.3	2.2	1.1	2	1.94
	3	8	67	3.4	2.3	1.1	1.9	1.4	1	2.2	2.2	2.3	2	1.98
	3	9	68	2.6	3.2	2.5	2.4	1.6	2.4	2.8	2	2.1	2.6	2.42
	3	10	69	2.8	2.2	2.3	1.5	1.1	1.9	1.7	1.6	2.5	1.9	1.95
	3	11	70	2.8	2.5	2.6	1.3	2	2.4	1.7	2.5	2.2	1.8	2.18
	3	12	71	1.8	2.8	2.8	2	1.8	2.4	2.1	2.4	2.5	2.4	2.3
	3	13	72	1.7	1.5	2.5	1.4	1.6	2.8	1.7	1.8	2.7	1.9	1.96
	3	14	73	2.3	1.5	2.3	1.3	1.9	2.9	1.6	1.8	1.9	1.8	1.93
	3	15	74	2.4	2.1	2.3	1.3	2.5	2.3	1.4	2.7	2.1	1.1	2.02
	3	16	75	2.4	2.3	2.7	2.2	2.7	2.9	2.3	2.6	2.1	1.9	2.41
	3	17	76	3.2	2.4	2.3	2.4	2.2	2.5	2.1	2.1	1.8	1.9	2.29
	3	18	77	3.4	2	1.8	2.3	2.1	1.9	1.7	2.3	1.6	1.7	2.08
	3	19	78	2.5	2.3	1.1	2.2	2.6	1.5	2.2	2.1	2.7	1.8	2.1
	3	20	79	2.6	1.9	2.1	2.1	2.1	2.8	2.9	2.3	1.8	2.3	2.29
	3	21	80	3.4	2	1.9	2.7	2.1	2.2	2.5	1.8	2.5	1.8	2.29
	3	22	81	4.4	2.3	3.1	2.5	2.3	3.3	3.4	1.8	2.5	1.4	2.7
	3	23	82	3.7	2.4	2.8	2.1	2.5	2.6	2.8	2.2	3.2	1.9	2.62
	3	24	83	3.8	2.3	2.8	2.1	3.2	2.6	3.9	2.4	3	2.9	2.9
	3	25	84	3.3	2.4	3.1	2.6	3.1	2.7	3.6	2.2	2.6	3	2.86
	3	26	85	2.4	2.7	2.8	2.8	2.8	2	3.2	2.8	2.8	3.1	2.74
	3	27	86	2.9	2.7	2.9	2.8	2.9	2.7	3.1	3.1	2.4	3	2.85
	3	28	87	2.2	2.1	2.5	2.5	2.1	2.5	3	2.4	2.2	3	2.45
	3	29	88	3.8	2.7	2.9	2.5	2.2	2.9	2.8	2.6	2.3	2.5	2.72
	3	30	89	3.6	2.1	3.3	2.4	1.6	3.1	1.6	1.9	2.5	2.4	2.45
	3	31	90	3.1	3.1	2.8	2.4	2.6	3.3	2	2.8	2.8	2	2.69
	4	1	91	3.3	1.9	1.4	1.7	2.2	3.7	3	2.4	1.8	2	2.34
	4	2	92	3.3	3.4	1.6	3.1	3.1	2.2	2.9	3	2.6	2.4	2.76
	4	3	93	2.9	3.6	2.6	3.3	3.6	3.1	3.2	3.1	3.3	2.2	3.09
	4	4	94	2.5	3.1	3.4	3	2.9	3.6	3.3	3	1.9	2.9	2.96
	4	5	95	2.9	2.7	1.9	2.6	3	1.9	3	2.9	3	2.8	2.67
	4	6	96	3.4	2.5	2.8	2.4	3	3.1	3.2	2.8	3.7	2.9	2.98
	4	7	97	3.3	2.5	3	2.1	3.1	4.2	3.6	2.9	3.8	2.2	3.07
	4	8	98	2.5	2.9	3	2.4	3.7	4.2	3.7	3.5	2.9	2.6	3.14
	4	9	99	3	3	2.1	2.4	3.6	2.9	2.8	4.2	3.3	2.2	2.95
	4	10	100	2.8	2.2	2.4	2.5	2.9	2.7	2.6	2.8	2.6	2.4	2.59
	4	11	101	3.6	2.9	2.2	2.2	3.1	2.2	2.4	2.9	3.2	2.2	2.69
	4	12	102	3.9	2.5	3.4	2.6	3.2	3.7	3.4	2.1	3.1	3.1	3.1
	4	13	103	5	3.1	2.9	2.2	3.3	3.4	2.5	2.5	3.2	2.5	3.06
	4	14	104	4.6	3.2	3.3	2.8	3.2	3.7	3.3	2.6	1.7	3.2	3.16
	4	15	105	4.9	3.3	2	2.8	4	2	2.9	3.1	3.2	2.9	3.11
	4	16	106	3.4	3.2	3.5	3.1	3.1	3.3	3	2.9	3.9	2.9	3.23
	4	17	107	3.3	3.2	3.7	3.5	3.6	3.2	3.2	3.7	3.7	3.4	3.45
	4	18	108	4	2.6	3.4	3.5	3.7	3.1	4	3.8	3.7	3.1	3.49
	4	19	109	3.8	3.4	3.7	3.6	4.2	3.1	3.7	4.5	3.7	2.9	3.66
	4	20	110	3.9	3	3.4	3.3	3.8	3.3	3.3	3.9	3.6	3.3	3.48
	4	21	111	4.1	3.5	3.3	3.2	3.5	2.9	3.1	3.8	4.1	3.3	3.48
	4	22	112	4.8	3.5	3.6	2.8	3.5	3	3.4	3.1	3.5	3.7	3.49
	4	23	113	4.5	3.5	2.8	2.7	3.8	3.1	3.6	3.3	2.7	3.8	3.38
	4	24	114	4.8	3.7	2.7	2.6	4.7	2.5	2.9	3	3	2.7	3.26
	4	25	115	4.3	3.5	3.1	3.6	3.8	2.7	4	3.1	4.3	3.5	3.59
	4	26	116	5.3	3.3	4.1	2.8	3.4	4.1	4.1	2.9	4.1	3.2	3.73
	4	27	117	4.8	2.7	4	2.7	3.2	4.1	3.7	2.9	4.3	3.3	3.57
	4	28	118	4.4	3.8	3.6	3.7	3.8	4.5	4.1	3.8	3.7	4.2	3.96
	4	29	119	4.4	3.9	3.2	3.4	4.2	4.1	3.8	4.2	3.5	3.8	3.85
	4	30	120	4.5	4.2	3.5	3.3	5.4	4.1	3.6	5.8	3.9	3.7	4.2
	5	1	121	5.1	4.1	3.9	2.9	4.4	4.4	3.5	4.5	3.3	3.2	3.93
	5	2	122	4.9	4.3	2.9	3.2	4.4	3.6	3.5	4.2	3.3	3.3	3.76
	5	3	123	5.2	4.4	2.9	3.5	4.1	4.1	4.1	3.7	4.5	3	3.95
	5	4	124	4.8	4.1	4.3	4.2	4.7	5.5	4.9	4.4	4.4	3.8	4.51
	5	5	125	4.1	4.7	4	4.5	4.4	5.6	5.8	4.4	3.1	3.9	4.45
	5	6	126	3.7	3.9	3.2	4	3.8	4	5.1	3.6	3.9	4	3.92
	5	7	127	3.8	3.9	3.9	3.6	3.8	4.1	4.4	3.7	3.5	3.3	3.8
	5	8	128	3	3.7	4.1	3.1	3.6	4.3	4	3.8	4.3	3.1	3.7
	5	9	129	3.6	3.5	4.6	2.5	3.9	4.7	3.4	4.3	4.7	3.1	3.83
	5	10	130	3.3	3	4.8	2.9	3.7	4.7	3.8	3.4	4.3	3.8	3.77
	5	11	131	4.1	3.7	4.2	3.6	4.7	3.7	4	4.4	4.6	4.2	4.12
	5	12	132	4.9	3.1	4.6	2.9	4.3	3.9	3.6	3.8	5	3.9	4
	5	13	133	3	4	4.9	3.4	4.6	3.6	4.1	4.4	5	5.3	4.23
	5	14	134	4.3	4.9	5.2	3.3	5	4	3.6	4.4	4.7	4.2	4.36
	5	15	135	3.9	3.9	4.6	3.3	2.9	3.8	3.6	3	4.7	3.8	3.75
	5	16	136	3.5	4.8	4.6	2.9	4.3	3.8	3.6	4.3	5.1	3.1	4
	5	17	137	4.7	3.9	5	3.3	3.9	4.4	4.4	3.9	5.3	3.9	4.27
	5	18	138	4.5	3.6	4.8	4.8	3.5	4.7	5.8	3.7	5.8	5.2	4.64
	5	19	139	4.7	5	4.9	3.6	4.6	5	4.1	4.8	5.2	4.6	4.65
	5	20	140	5.2	4.9	4.6	4.3	4.2	5.1	4.7	4.5	5.2	4.8	4.75
	5	21	141	5.5	5.2	5	3.9	5	4.3	4.2	5.3	5.1	3.4	4.69
	5	22	142	6	4.9	4.9	4.2	4.4	4.9	4.4	4.6	4.9	4.3	4.75
	5	23	143	6.9	5.1	4.7	3.9	5	4.8	4.1	5.1	5.7	3.2	4.85
	5	24	144	4.6	5.2	4.9	4.6	4.5	5.7	4.4	4.6	4.8	4.1	4.74
	5	25	145	5.1	5.8	4.9	4.7	4.4	5.1	4.7	4.7	3.3	4.2	4.69
	5	26	146	5.2	3.9	3.5	4.3	3.9	3.5	4.4	4.4	4.6	4.1	4.18
	5	27	147	5.8	4.5	5	4.1	4.9	5.1	4.6	5.4	5	4.5	4.89
	5	28	148	5.6	4.6	5	4.7	5.1	5.6	5.6	5.8	5.9	5.5	5.34
	5	29	149	5.5	4.9	6.2	5	5	6.3	6.6	5.2	5.1	6.9	5.67
	5	30	150	5.3	5.2	5.9	5.3	5.2	5.8	6	5.2	5.1	5.7	5.47
	5	31	151	5.3	5.4	5.7	4.9	5.5	5.7	5.8	5.1	4.8	4.8	5.3
	6	1	152	5.6	5.2	5.2	4.7	5	5.3	5.6	5	5	4.6	5.12
	6	2	153	5.5	5.2	5.6	5.1	4.9	5.3	5.4	5.1	5.2	4.8	5.21
	6	3	154	5.2	5.4	5.6	4.8	4.8	5.6	4.5	5.2	5.3	4.8	5.12
	6	4	155	6.3	5.7	5.2	4.1	5.4	5.2	4.2	5.5	5.6	4.5	5.17
	6	5	156	5.1	5.2	6	5.2	5.4	5.6	4.5	5.3	6.9	5.4	5.46
	6	6	157	5.3	6	7.1	6.1	5.8	6.7	6.4	5.7	5.7	7.2	6.2
	6	7	158	5.1	4.8	5.9	4.6	6.3	5.4	4.7	6	4.8	5	5.26
	6	8	159	5.8	5	4.7	4.5	6.4	4.6	4.3	6.6	4.7	4.5	5.11
	6	9	160	6	5	5.1	4.5	5.8	4.9	4.4	6.1	5.3	4.6	5.17
	6	10	161	6.5	5.7	5.4	4.4	6.2	5.3	4.6	6.4	5.5	4.7	5.47
	6	11	162	5.6	5.2	5.6	4.4	5.6	5.7	5.3	5.3	6.7	5	5.44
	6	12	163	5.5	6.4	6.5	4.6	7.2	7	6.1	6.7	6.4	6.1	6.25
	6	13	164	5.5	6.2	6.7	5.4	6.4	7.1	5.9	6.1	5.9	6.3	6.15
	6	14	165	6.2	5.9	6.2	5	5.8	6.2	5.5	5.6	5.7	5.5	5.76
	6	15	166	6.3	5.8	6	4.3	5.7	5.6	4.7	5.5	5.9	4.3	5.41
	6	16	167	6	6.3	6	5	6.4	5.8	5.2	5.8	6	4.9	5.74
	6	17	168	7.2	6.3	6.4	5.6	7.4	6.3	5.7	6.7	6.9	5.3	6.38
	6	18	169	7.7	5.9	7.2	6.5	7.1	7.4	7	6.8	7.6	6.5	6.97
	6	19	170	7.3	6.8	8.2	7.7	7.5	7.6	8.4	7.9	6.6	7.7	7.57
	6	20	171	8.2	7	6.9	6	7.4	6.7	6.5	7.3	6.5	5.9	6.84
	6	21	172	6.9	6.6	6.5	6	6.7	6.4	6.4	6.4	5.6	5.6	6.31
	6	22	173	5.4	8.3	5.7	5.2	7	5.5	5.1	6.7	5.8	4.7	5.94
	6	23	174	6.5	7.1	5.8	5.1	5.6	5.7	5.1	5.4	5.6	4.9	5.68
	6	24	175	8.1	5.5	5	5.4	6.3	5.6	5.4	6.3	5.4	5.4	5.84
	6	25	176	7.1	6.5	4.8	4.8	6.2	5.3	4.9	6.1	5.7	4.9	5.63
	6	26	177	6.4	7.8	5.3	5.1	7.3	5.6	5.3	7	6.3	5.4	6.15
	6	27	178	6.1	6.9	6.2	5.8	7.1	6.3	5.9	6.5	6.9	6.2	6.39
	6	28	179	7.1	6.1	6.9	6.4	6.1	7	6.5	5.9	7.5	6.9	6.64
	6	29	180	7	5.9	7.5	6.9	6.9	7.8	7.1	6.9	6.1	7.7	6.98
	6	30	181	7.2	7	5.8	5.3	6.1	6.1	5.7	6.1	6	6	6.13
	7	1	182	7.9	7.2	6.2	6	6.7	6.3	6.3	7	5.9	6.5	6.6
	7	2	183	8.2	7.3	5.8	5.3	7.1	5.9	5.8	7.2	4.5	6	6.31
	7	3	184	7.2	7.7	4.5	4.9	6.9	4.5	5.1	7.3	6.3	5.3	5.97
	7	4	185	7.6	8.1	6.4	5.9	6.9	6.4	6.2	7.5	6.9	6.6	6.85
	7	5	186	7	7.1	6.9	6.1	5.8	7	6.7	6.2	5.9	7.2	6.59
	7	6	187	6	7.6	6	5.4	5.8	5.8	5.4	6.1	4.9	5.8	5.88
	7	7	188	6.8	6.8	4.9	4.5	7.4	4.7	4.5	7.5	5.7	4.6	5.74
	7	8	189	8	6.1	5.8	5.2	8.6	5.7	5.3	8.5	6.4	5.2	6.48
	7	9	190	7.6	7	6.4	5.9	6.7	6.3	5.9	6.6	6	5.9	6.43
	7	10	191	7.1	8.6	6.2	5.7	5.9	6.1	5.7	5.7	5.7	5.8	6.25
	7	11	192	7.3	7.8	5.8	5.2	7.3	5.9	5.2	7.2	5.5	5.4	6.26
	7	12	193	6.9	7.2	5.8	5.2	7.5	5.6	5.2	7.4	5.3	5.4	6.15
	7	13	194	7.2	6.9	5.5	5	6.7	5.4	5.1	6.5	6.2	5.3	5.98
	7	14	195	6	6	5.7	4.9	7.3	6.1	5.7	7	6	5.8	6.05
	7	15	196	6.4	6.2	5.7	5.2	8.8	6	5.9	8.2	5.8	6.1	6.43
	7	16	197	6.5	5.7	5.9	5.4	8.4	5.9	5.5	7.9	5.2	5.8	6.22
	7	17	198	6.8	5.8	5.3	4.7	8.1	5.2	4.7	7.6	5.2	4.9	5.83
	7	18	199	6.9	6.1	5.2	4.7	7.2	5.2	4.7	7	5.5	5	5.75
	7	19	200	6.9	6.5	5.5	4.9	6.2	5.5	4.9	6.1	5.7	5.2	5.74
	7	20	201	6.2	6.6	5.5	4.6	5.8	5.4	4.7	5.4	5.2	4.9	5.43
	7	21	202	6.3	6.5	5.3	4.6	5.4	5.2	4.7	5.3	5.4	5	5.37
	7	22	203	6.5	6.7	5.5	5	6.4	5.4	5	5.9	7.2	5.5	5.91
	7	23	204	6.2	6.2	7.3	6.8	5.8	7.3	6.7	6.3	8	7.2	6.78
	7	24	205	6.9	6.2	7.9	7.4	5.3	7.9	7.7	4.9	6.7	7.7	6.86
	7	25	206	5.6	6	6.6	6.1	5.8	6.6	6.3	5.4	6.6	6.3	6.13
	7	26	207	5.6	5.7	6.7	6.5	5.4	6.8	6.8	5.4	5.3	6.9	6.11
	7	27	208	6	6.7	5.4	5.4	5.5	5.4	5.6	5.2	5.8	5.9	5.69
	7	28	209	5.8	5.6	6	5.9	6.8	5.9	6.1	6.2	6.3	6.5	6.11
	7	29	210	6.9	5.4	6.7	7	5.8	6.3	6.8	6	6.2	6.9	6.4
	7	30	211	6.7	5.8	6.1	5.8	5.6	6.1	5.8	5	6.1	6	5.9
	7	31	212	5.9	5.7	6.2	5.5	5.3	6	5.7	4.9	4.4	6	5.56
	8	1	213	5.3	6.3	4.4	4.7	4.8	4.4	4.7	4.9	5.3	5	4.98
	8	2	214	5.1	5.8	5.1	5.3	5.9	5.5	5.4	5.8	6	5.8	5.57
	8	3	215	5.6	5.4	5.7	5.5	6.9	6	5.8	6.9	5.6	6.3	5.97
	8	4	216	6.7	4.9	5.4	5.4	6.6	5.5	5.5	6.6	5.8	5.8	5.82
	8	5	217	6.3	5	5.8	5.4	5.8	6	5.7	5.9	6.8	5.9	5.86
	8	6	218	6	5.3	5.9	5.4	5.9	7	5.9	5.8	6.5	6.9	6.06
	8	7	219	6.1	5.9	5.6	5.4	6.8	6.9	6.5	6.7	6.5	7	6.34
	8	8	220	6.5	5.4	5.6	5.2	5.1	6.6	6.2	5.1	5.7	6.8	5.82
	8	9	221	5.5	5.3	5.5	5.2	5.4	6	5.6	5.4	5.4	6.3	5.56
	8	10	222	5	5.6	5.4	5	5.3	5.5	5.1	5.4	6.2	5.6	5.41
	8	11	223	5.5	6	6.1	5.8	5.3	6.4	6	5.4	5.6	6.6	5.87
	8	12	224	5	5.1	5.5	5.1	5.2	5.7	5.3	5.1	5.3	5.7	5.3
	8	13	225	4.7	4.8	5.1	4.5	5.6	5.3	4.9	5.6	6.3	5.2	5.2
	8	14	226	5.3	5.1	6	5.5	5.5	6.3	6.1	5.5	6.6	6.1	5.8
	8	15	227	5.4	4.8	6	5.6	4.9	6.5	6.4	4.9	5.8	6.4	5.67
	8	16	228	5	4.6	5	4.8	5	5.9	5.6	4.9	6.2	5.5	5.25
	8	17	229	5.7	5.3	5.4	5.2	6	6.3	6.1	6.1	5.7	6.2	5.8
	8	18	230	5.4	5.4	4.9	4.7	6.3	5.9	5.7	6.3	4.8	5.8	5.52
	8	19	231	5.8	5	4.5	4	5.7	4.9	4.6	5.8	5.2	4.6	5.01
	8	20	232	4.1	4.6	4.3	3.7	4.7	5.3	4.6	4.7	5	4.7	4.57
	8	21	233	3.5	4.7	4.8	4.3	4.2	5.2	4.7	4.3	5.3	4.8	4.58
	8	22	234	4.5	4.8	4.9	4.7	4.3	5.3	5.1	4.5	5	5.2	4.83
	8	23	235	4.3	3.7	4.8	3.9	5	4.9	4.3	5	5.4	4.2	4.55
	8	24	236	4.8	3	5	3.4	4.2	5.5	4.5	3.7	4.7	4.6	4.34
	8	25	237	4.9	4.1	4.5	2.5	4.2	4.7	3.6	4	5.3	3.6	4.14
	8	26	238	5.6	3.9	4.8	4	4.4	5.5	5.1	4.1	5.7	5.3	4.84
	8	27	239	5.7	4.1	4.6	3.7	4.5	5.8	5.3	4.2	5.1	5.4	4.84
	8	28	240	5.5	4.1	4.4	3.5	4.1	5.2	4.8	3.9	4.7	4.7	4.49
	8	29	241	4.4	4.4	4.4	3.3	4	4.7	4	3.9	4	4.1	4.12
	8	30	242	5.1	4.7	3.5	3.4	4.6	4.1	4	4.6	4.3	4	4.23
	8	31	243	5.4	4.8	4.1	3.5	4.4	4.3	4	4.4	4.5	3.9	4.33
	9	1	244	5.3	4.2	4.2	4	4.4	4.4	4.4	4.4	4.5	4.5	4.43
	9	2	245	5.3	4.7	4.5	4	4.1	4.5	4.3	4.1	4.5	4.2	4.42
	9	3	246	4.3	4.7	4.4	3.8	4.4	4.6	4.3	4.5	4.5	4.5	4.4
	9	4	247	3.8	4.8	4.3	3.8	4.3	4.8	4.5	4.3	4.1	4.9	4.36
	9	5	248	4.5	4.5	3.9	3.8	4.4	4.2	4.5	4.4	3.9	4.9	4.3
	9	6	249	3.9	4.1	3.7	3.5	4.4	4	4.2	4.6	4.4	4.2	4.1
	9	7	250	4.4	3.7	3.9	3.6	5.1	4.5	4.5	4.9	4.3	4.5	4.34
	9	8	251	5.3	4.2	3.6	3.2	5.9	4.2	4.1	5.7	4.3	4.2	4.47
	9	9	252	4.2	3.5	3.5	2.9	5.3	4.3	3.9	5.2	3.7	4.3	4.08
	9	10	253	4	3.8	3.2	3.2	4.3	3.6	3.8	4.3	3.8	4	3.8
	9	11	254	3.3	4.1	3.7	2.9	4.1	3.7	3.4	4.1	3.6	3.6	3.65
	9	12	255	3.8	3.9	3.7	2.7	3.7	3.5	3.1	3.6	4.4	3.3	3.57
	9	13	256	3.7	4	4.1	4	3.6	4.4	4.3	3.6	4.1	4.5	4.03
	9	14	257	3.2	3.1	3.8	3.9	4	4.2	4	4.1	3.6	4.1	3.8
	9	15	258	3.9	3.6	3.5	3.6	3.1	3.7	3.6	3.3	3.3	3.9	3.55
	9	16	259	4.2	3.5	3.4	3.4	3.6	3.4	3.3	3.6	3.9	3.6	3.59
	9	17	260	3.8	3.3	4.1	4	4.8	3.8	3.8	4.8	3.9	4.2	4.05
	9	18	261	4.3	2.9	4.3	4.4	2.9	3.8	3.9	2.8	4.4	4.4	3.81
	9	19	262	2.9	3.6	4.7	4.6	3.1	4.2	4.5	3.2	2.9	4.7	3.84
	9	20	263	3.3	3.6	3.1	3	3.2	2.8	2.9	3.3	2.9	3.3	3.14
	9	21	264	3.4	3.3	3	2.9	3.1	2.9	2.8	3.1	2.7	3.2	3.04
	9	22	265	3.2	3.6	2.9	2.7	3.2	2.7	2.7	3.3	2.8	2.8	2.99
	9	23	266	2.7	2.4	2.6	2.5	2.7	2.7	2.8	2.8	3.1	2.8	2.71
	9	24	267	2.9	3.2	3.2	2.6	4.3	2.9	2.8	4.5	2.3	2.9	3.16
	9	25	268	3.1	3.5	2.7	1.8	3.7	2.7	1.9	3.8	2.5	2.1	2.78
	9	26	269	2.8	3.2	2.4	2.6	2.7	2.6	2.7	2.8	3.3	3	2.81
	9	27	270	2.6	2.5	3.4	2.5	2.5	3.5	3.1	2.5	3.7	3.2	2.95
	9	28	271	2.5	3	3.8	2.6	2.7	3.7	1.7	2.8	2.8	2.7	2.83
	9	29	272	2.7	3	2.9	2.6	3	2.8	2	3.1	2.9	2.6	2.76
	9	30	273	3.1	2.8	3.2	2.1	2.8	3.1	2	2.8	2.5	2.3	2.67
	10	1	274	2.6	2.6	2.2	2.4	3.1	2.5	2.6	3.3	2.8	3.1	2.72
	10	2	275	2.6	2.6	2.8	2.4	2.8	2.9	2.8	3	2.5	2.9	2.73
	10	3	276	2.7	3	1.9	2.5	2.8	2.4	3	2.8	2.2	2.8	2.61
	10	4	277	2.8	3.2	1.7	2.3	3	1.9	2.7	2.9	2.4	2.4	2.53
	10	5	278	2.4	2.8	1.8	2	3	2	2.4	2.8	2.7	2.3	2.42
	10	6	279	2.5	2.8	1.7	2	3	2	2.6	2.8	2.7	2.5	2.46
	10	7	280	2.4	2.8	2	2.4	2.7	2.2	2.8	2.6	2.5	2.7	2.51
	10	8	281	2.5	2.7	1.8	2.4	2.4	2.2	2.7	2.4	2.4	2.7	2.42
	10	9	282	2.4	2.5	2.1	2.4	2.5	2.2	2.5	2.3	2	2.4	2.33
	10	10	283	2.3	2.6	1.7	2	2.9	1.9	2.1	2.8	1.6	2	2.19
	10	11	284	2.6	2.4	1.1	1.9	2.4	1.6	1.9	2.4	2.2	1.8	2.03
	10	12	285	3.2	2.5	1.7	1.9	2.5	2.2	1.9	2.3	2.2	2	2.24
	10	13	286	3.3	2.6	1.7	2.1	2.3	2.2	2.2	2.5	2.3	2.1	2.33
	10	14	287	2.6	2.1	1.7	1.8	2.3	2.2	2	2.3	2.9	2.1	2.2
	10	15	288	2.4	2.1	2	1.8	2.8	2.9	2.1	2.5	2.4	2.1	2.31
	10	16	289	3.6	2.8	2.2	1.7	3.3	2.5	1.4	3.1	2	1.4	2.4
	10	17	290	2.1	3.7	2.2	2.1	3.3	2.2	1.5	3	1.7	1.5	2.33
	10	18	291	1.8	2.5	2	1.9	2.3	2.1	1.7	2.2	1.5	1.8	1.98
	10	19	292	1.9	2.8	1.6	1.6	2.6	1.6	1.6	2.4	1.5	1.7	1.93
	10	20	293	1.9	2.8	1.5	1.4	2.6	1.9	1.5	2.5	1.7	2.1	1.99
	10	21	294	1.7	2.2	2.3	1.7	1.8	2.6	2	1.9	1.9	2.5	2.06
	10	22	295	1.8	1.8	2	1.7	1.3	1.9	1.6	1.4	1.5	2	1.7
	10	23	296	1.6	2	1.6	1.5	2	1.5	1.4	1.6	1.5	1.5	1.62
	10	24	297	1.6	1.8	1.6	1.4	1.7	1.5	1.3	1.8	1.6	1.5	1.58
	10	25	298	1.8	1.8	1.7	1.5	1.6	1.6	1.5	1.6	1.6	1.7	1.64
	10	26	299	1.8	1.9	1.7	1.5	1.4	1.7	1.6	1.6	1.7	1.7	1.66
	10	27	300	1.7	1.6	1.8	1.3	1.8	1.7	1.4	1.6	1.5	1.6	1.6
	10	28	301	1.7	1.6	1.6	1.3	1.9	1.5	1.4	1.3	1.6	1.3	1.52
	10	29	302	1.6	1.7	1.8	1.5	1.9	1.8	1.6	1.3	1.8	1.5	1.65
	10	30	303	1.4	1.4	1.3	0.9	2.1	2.5	2	1.5	1.3	2	1.64
	10	31	304	2.3	1.6	1.2	1.2	2.2	1.4	1.2	1.6	1.4	1.2	1.53
	11	1	305	1.8	1.6	1.3	1.2	2.8	1.5	1.2	1.9	1.2	1.2	1.57
	11	2	306	1.8	1.5	1.3	1.2	2.5	1.4	1.2	1.6	1.1	1.2	1.48
	11	3	307	1.8	1.3	1.3	1.1	2.4	1.6	1.2	2	1.1	1.3	1.51
	11	4	308	1.6	1.9	1.4	1.2	1.6	1.5	1.2	1.6	1.2	1.3	1.45
	11	5	309	1.2	1.5	1.2	1.1	1.4	0.9	1.3	1.2	1.2	1.4	1.24
	11	6	310	1.2	1.6	1.4	1.2	1.4	1.3	1.4	1.3	1.3	1.3	1.34
	11	7	311	1.2	1.6	1.3	1.1	1.6	1.4	1.4	1.7	1.2	1.4	1.39
	11	8	312	1.2	1.3	1.1	0.9	1.5	1.1	1.2	1.4	1.3	1.2	1.22
	11	9	313	1	1.2	0.9	0.8	2.2	0.8	1.3	1.8	1.9	1.3	1.32
	11	10	314	1.1	1.3	1.6	1.3	1.4	1.5	2	1.1	2	1.7	1.5
	11	11	315	1.3	1.2	1.5	1	1.7	1.3	1.7	1.6	1.6	1.8	1.47
	11	12	316	1.3	1.4	1.6	1.1	1.5	1.1	1.4	1.4	1.4	1.5	1.37
	11	13	317	1	1.1	1.3	0.9	1	1	1.4	1	1	1.3	1.1
	11	14	318	1.1	1.2	1.1	0.6	1.1	1	1.1	1	1.1	1	1.03
	11	15	319	1.4	1.2	1.1	0.8	1.1	1	1.2	1.1	1	1.1	1.1
	11	16	320	1.3	1.1	1	0.9	1	1	1.1	0.9	1	1	1.03
	11	17	321	1.4	0.9	1	0.9	1	0.9	0.9	0.9	1.1	1	1
	11	18	322	1.3	1.1	1.2	0.9	0.9	1.1	0.9	0.8	0.9	1.2	1.03
	11	19	323	1	0.8	0.9	0.8	0.7	1	0.8	0.7	0.8	0.9	0.84
	11	20	324	0.9	0.9	0.9	0.7	0.9	0.9	0.6	1	0.9	0.7	0.84
	11	21	325	0.9	1.2	1	0.8	1.1	1	0.7	1	0.9	0.9	0.95
	11	22	326	0.8	1.2	1.1	0.9	1.1	0.8	0.7	0.9	0.8	0.8	0.91
	11	23	327	0.8	1.1	1	0.9	0.9	0.9	0.7	1	0.9	0.7	0.89
	11	24	328	0.9	0.8	1.6	1.4	0.9	1.1	0.8	0.8	1.3	0.7	1.03
	11	25	329	0.7	0.8	1.6	1.2	0.8	0.9	0.8	0.8	0.8	1.1	0.95
	11	26	330	0.8	0.8	1	0.8	0.9	0.8	0.6	0.9	0.8	0.8	0.82
	11	27	331	0.7	0.6	0.9	0.8	0.8	0.9	0.7	0.8	1.1	0.8	0.81
	11	28	332	0.7	0.6	1.1	0.8	0.7	1.1	0.7	0.7	0.9	1.1	0.84
	11	29	333	0.7	0.8	1.2	1	1	0.8	0.6	0.8	0.7	0.9	0.85
	11	30	334	0.6	0.7	0.9	0.8	0.7	0.8	0.6	0.8	0.7	0.7	0.73
	12	1	335	0.5	0.8	0.9	0.8	0.8	0.7	0.5	1.1	0.8	0.7	0.76
	12	2	336	0.6	0.7	1.2	1	0.8	0.7	0.7	0.9	0.8	0.8	0.82
	12	3	337	0.5	0.8	1.6	1.2	0.8	0.8	0.8	0.9	0.6	1.1	0.91
	12	4	338	0.7	0.7	0.7	0.6	0.6	0.6	0.7	0.8	0.7	0.8	0.69
	12	5	339	0.6	0.6	0.9	0.6	0.9	0.7	0.8	1.3	0.7	0.9	0.8
	12	6	340	0.6	0.8	1.2	0.8	0.9	0.9	0.6	1.7	0.6	1.1	0.92
	12	7	341	0.6	0.6	0.9	0.6	0.7	0.7	0.7	1	0.6	0.8	0.72
	12	8	342	0.6	0.7	0.9	0.8	0.6	0.6	0.7	0.7	0.7	0.8	0.71
	12	9	343	0.9	0.7	0.9	0.8	0.6	0.5	0.8	0.6	0.7	0.9	0.74
	12	10	344	0.8	0.6	0.9	0.7	0.7	0.4	1	0.7	0.6	1	0.74
	12	11	345	0.9	0.6	0.8	0.6	0.5	0.4	0.7	0.6	0.7	0.7	0.65
	12	12	346	1	0.6	0.8	0.6	0.6	0.4	0.7	0.6	0.7	0.7	0.67
	12	13	347	1.1	0.7	0.8	0.7	0.6	0.4	0.6	0.6	0.6	1	0.71
	12	14	348	0.9	0.8	0.7	0.6	0.7	0.4	0.7	1	0.5	1	0.73
	12	15	349	1	0.7	0.7	0.7	0.5	0.4	0.7	0.6	0.6	0.8	0.67
	12	16	350	1	0.7	0.7	0.7	0.5	0.3	0.6	0.5	0.6	0.7	0.63
	12	17	351	0.9	1.3	0.9	0.8	0.6	0.3	0.5	0.7	0.6	0.7	0.73
	12	18	352	0.9	1.3	1.2	0.9	0.6	0.4	0.6	0.9	0.5	1	0.83
	12	19	353	1	1.1	1.1	1	0.6	0.4	0.7	1.1	0.7	0.8	0.85
	12	20	354	1	1.3	1.5	1.1	0.7	0.3	0.9	0.7	0.6	1.3	0.94
	12	21	355	1.2	1.1	1.4	1.3	0.7	0.4	0.5	0.7	0.5	1.4	0.92
	12	22	356	0.7	1	0.8	1	0.7	0.4	0.5	0.7	0.5	0.8	0.71
	12	23	357	0.6	1.1	0.8	1	0.6	0.3	0.5	0.6	0.5	0.9	0.69
	12	24	358	0.8	1	0.8	1	0.6	0.3	0.5	0.7	0.5	1	0.72
	12	25	359	0.7	1.3	0.7	0.9	0.6	0.3	0.6	0.6	0.6	0.7	0.7
	12	26	360	0.9	1.3	0.9	1	0.5	0.3	0.4	0.6	0.7	0.9	0.75
	12	27	361	1	0.9	1	1	0.6	0.5	0.5	0.6	0.7	0.8	0.76
	12	28	362	1	0.7	1	1	0.6	0.4	0.7	0.6	0.6	0.7	0.73
	12	29	363	0.9	0.8	0.9	0.9	0.6	0.3	0.5	0.5	0.9	0.6	0.69
	12	30	364	1.2	0.7	1.2	1.4	0.6	0.5	1	0.4	0.8	0.6	0.84
	12	31	365	1.1	0.9	1.1	1.2	0.6	0.4	0.5	0.4	0.8	0.5	0.75

## Sheet: Sayfa1
																	Monthly Average
						ETo-PM													ETo-PM
	month	day	DOY	2008	2009	2010	2011	2012	2013	2014	2015	2016	2017	AVE.			2008	2009	2010	2011	2012	2013	2014	2015	2016	2017	AVE.	Std. ERROR
	#	#
	1	1	1	0.4	0.4	0.8	0.8	0.6	0.6	0.4	0.6	0.4	0.7	0.57		Jan	0.693548	0.845161	0.867742	0.8	0.716129	0.741935	0.764516	0.677419	0.687097	0.754839	0.754839	0.0190133	0.190133
	1	2	2	0.5	0.3	0.9	0.8	0.5	0.7	0.4	0.7	0.5	0.7	0.6		Feb	1.15161	1.1871	1.1871	1.09032	1.15161	1.37419	1.58387	1.24839	1.46129	1.18387	1.26194	0.0458721	0.458721
	1	3	3	0.9	0.3	0.8	0.7	0.5	1.1	0.6	0.6	0.4	0.9	0.68		Mar	2.75484	2.17419	2.29032	2.0129	2.03871	2.30323	2.31613	2.22903	2.25806	2.08387	2.24613	0.060725	0.60725
	1	4	4	0.7	0.4	1.1	0.8	1.4	0.8	0.3	1.1	0.4	0.7	0.77		Apr	3.84839	3.12581	2.98065	2.84839	3.49032	3.25806	3.26774	3.26774	3.28387	2.94516	3.23161	0.0836925	0.836925
	1	5	5	0.6	0.4	0.5	0.5	1.1	0.5	0.3	0.8	0.4	0.7	0.58		May	4.68065	4.39032	4.57097	3.85161	4.37742	4.63871	4.47742	4.40645	4.65161	4.13548	4.41806	0.0746818	0.746818
	1	6	6	0.4	0.7	0.8	0.8	0.6	0.7	0.6	0.7	0.4	0.9	0.66		Jun	6.29032	6.06774	6.02258	5.27097	6.23548	6.00968	5.55161	6.09677	5.93226	5.4871	5.89645	0.0984732	0.984732
	1	7	7	0.5	0.6	0.5	0.6	0.6	0.6	0.6	0.6	0.8	0.5	0.59		Jul	6.73871	6.60645	5.95806	5.50645	6.5871	5.92903	5.66774	6.46452	5.86452	5.89032	6.12129	0.126124	1.26124
	1	8	8	0.4	0.7	1	1	0.6	0.7	1	0.6	0.8	1.2	0.8		Aug	5.28065	4.9	5.06452	4.56774	5.18065	5.58387	5.19677	5.14194	5.49355	5.41935	5.1829	0.0859095	0.859095
	1	9	9	0.6	0.7	1	1	0.6	0.5	1	0.4	0.9	1.1	0.78		Sep	3.73548	3.64839	3.60645	3.24839	3.8	3.69355	3.47742	3.82903	3.61613	3.71935	3.63742	0.0491697	0.491697
	1	10	10	0.7	0.8	1.2	1.2	0.7	0.5	1.1	0.4	0.6	0.9	0.81		Oct	2.24516	2.36452	1.80645	1.82258	2.39677	2.04194	1.96774	2.26129	1.9871	2.02903	2.09226	0.0613362	0.613362
	1	11	11	0.5	0.7	1.1	0.8	0.8	0.4	0.9	0.5	0.8	0.8	0.73		Nov	1.15484	1.15806	1.19355	0.977419	1.31613	1.09032	1.05161	1.16452	1.11613	1.1129	1.13355	0.0259338	0.259338
	1	12	12	0.5	0.7	1	0.9	0.6	0.5	0.9	0.5	0.5	0.8	0.69		Dec	0.845161	0.867742	0.964516	0.880645	0.645161	0.464516	0.651613	0.754839	0.645161	0.854839	0.757419	0.0440572	0.440572
	1	13	13	0.6	0.6	0.7	0.6	0.6	0.6	0.5	0.5	0.7	0.7	0.61		Std. Error	0.618714	0.585191	0.564951	0.502455	0.608386	0.594556	0.542042	0.595005	0.580716	0.553737	0.572671
	1	14	14	0.9	0.8	0.8	0.6	0.6	0.5	0.6	0.6	0.6	0.6	0.66			Monthly Total		ETo-PM
	1	15	15	0.9	1	0.8	0.6	0.7	0.5	0.6	0.5	0.6	0.5	0.67			2008	2009	2010	2011	2012	2013	2014	2015	2016	2017	AVE.	Std. Error
	1	16	16	1	1.2	0.8	0.7	1	0.6	0.5	0.6	0.7	0.5	0.76
	1	17	17	0.9	1.3	0.9	0.7	0.8	0.7	0.6	0.5	0.7	0.7	0.78		Jan	21.5	24.2	26	24.8	22.2	23	23.7	21	21.3	23.4	23.11	0.471296
	1	18	18	0.7	1.1	0.9	0.7	0.6	0.7	0.8	0.5	0.6	0.7	0.73		Feb	35.7	36.8	36.8	33.8	35.7	42.6	49.1	38.7	45.3	36.7	39.12	1.42204
	1	19	19	0.6	0.6	0.6	0.6	0.5	0.7	0.8	0.6	0.5	0.8	0.63		Mar	85.4	67.4	71	62.4	63.2	71.4	71.8	69.1	70	64.6	69.63	1.88248
	1	20	20	0.6	0.6	0.5	0.6	0.8	0.6	0.8	0.9	0.8	0.7	0.69		Apr	119.3	96.9	92.4	88.3	108.2	101	101.3	101.3	101.8	91.3	100.18	2.59447
	1	21	21	0.8	0.6	0.9	0.6	0.9	0.7	1	0.9	0.7	0.8	0.79		May	145.1	136.1	141.7	119.4	135.7	143.8	138.8	136.6	144.2	128.2	136.96	2.31514
	1	22	22	0.7	1.6	0.9	0.9	0.6	0.8	0.7	0.7	0.7	0.9	0.85		Jun	195	188.1	186.7	163.4	193.3	186.3	172.1	189	183.9	170.1	182.79	3.05267
	1	23	23	0.8	0.9	0.8	1	0.6	1.1	0.9	0.7	0.8	1.2	0.88		Jul	208.9	204.8	184.7	170.7	204.2	183.8	175.7	200.4	181.8	182.6	189.76	3.90985
	1	24	24	0.8	1	0.8	0.8	0.6	0.8	0.7	0.8	0.6	0.9	0.78		Aug	163.7	151.9	157	141.6	160.6	173.1	161.1	159.4	170.3	168	160.67	2.66319
	1	25	25	0.7	0.8	0.7	0.9	0.5	0.7	0.7	0.8	0.6	0.7	0.71		Sep	115.8	113.1	111.8	100.7	117.8	114.5	107.8	118.7	112.1	115.3	112.76	1.52426
	1	26	26	0.6	1	0.6	0.8	0.7	0.8	0.8	0.9	0.7	0.7	0.76		Oct	69.6	73.3	56	56.5	74.3	63.3	61	70.1	61.6	62.9	64.86	1.90142
	1	27	27	0.5	0.7	0.7	1	0.6	1.1	1	0.7	0.9	0.9	0.81		Nov	35.8	35.9	37	30.3	40.8	33.8	32.6	36.1	34.6	34.5	35.14	0.803949
	1	28	28	1	0.5	0.5	0.6	0.7	0.8	0.9	0.5	1	0.5	0.7		Dec	26.2	26.9	29.9	27.3	20	14.4	20.2	23.4	20	26.5	23.48	1.36577
	1	29	29	1	1.1	1.1	1	1.1	1.4	0.9	0.9	1.1	0.7	1.03		Std.Error	19.1801	18.2002	17.5399	15.5761	18.86	18.4312	16.8033	18.4452	18.0022	17.1658	17.7617
	1	30	30	0.9	0.8	0.8	0.8	0.8	1.1	1.3	0.9	1.2	0.4	0.9		Total	1222	1155.4	1131	1019.2	1176	1151	1115.2	1163.8	1146.9	1104.1	1138.46
	1	31	31	0.8	1.3	1.5	1.4	0.9	1.2	1.5	1	0.9	0.6	1.11
	2	1	32	0.8	0.9	1	0.8	0.8	0.9	1.1	1.1	0.5	0.7	0.86		Average	0.693548	0.845161	0.867742	0.8	0.716129	0.741935	0.764516	0.677419	0.687097	0.754839
	2	2	33	0.8	0.8	0.4	0.7	1.1	0.8	1	1.3	0.9	0.6	0.84		Total	21.5	24.2	26	24.8	22.2	23	23.7	21	21.3	23.4
	2	3	34	0.9	0.7	0.5	0.7	1.2	0.9	1.1	1.7	1.1	0.7	0.95		Std. Dv.	0.186074	0.312431	0.224614	0.2	0.208322	0.241901	0.275134	0.182043	0.207753	0.19294
	2	4	35	0.9	0.8	1	0.7	1.1	1.2	0.9	1.2	1	0.6	0.94		Std. Error	0.0334199	0.0561142	0.0403419	0.0359211	0.0374156	0.0434467	0.0494156	0.032696	0.0373135	0.034653
	2	5	36	0.9	0.9	0.7	0.7	1.1	0.9	1	1.2	1	0.7	0.91
	2	6	37	0.7	1	0.5	0.8	1.3	1	1.4	1.4	0.8	0.8	0.97
	2	7	38	0.9	1	0.8	1.1	0.6	0.8	1.4	1.1	0.8	0.8	0.93
	2	8	39	1.3	1.5	0.7	1	1	0.8	1.1	1.2	1.1	0.6	1.03
	2	9	40	1.1	1.7	1	1	1.1	1.3	1.3	1.2	1.2	0.7	1.16
	2	10	41	1	1.2	1.1	1.1	0.9	1.2	1.5	1	1.6	0.8	1.14
	2	11	42	1.3	1.3	1.4	1.2	0.9	1.1	1.9	1.1	1.2	0.9	1.23
	2	12	43	1.2	1.2	1.2	0.9	1	1.2	1.4	1	1.1	0.8	1.1
	2	13	44	1.2	1.2	0.8	0.7	1.2	1.1	1.7	1.3	1.2	1	1.14
	2	14	45	1	1.4	1.1	0.7	1.5	1.3	1.6	1.3	1.3	1	1.22
	2	15	46	0.7	1.1	1	1	1.7	1.8	1.6	1.3	2	1.2	1.34
	2	16	47	0.8	1	1.7	0.8	0.9	1.6	0.9	0.8	2.1	0.9	1.15
	2	17	48	1.4	0.9	1.7	0.8	0.8	1.4	1.3	0.9	2	1	1.22
	2	18	49	1.5	1.2	1.6	1.1	1.1	1.3	1.6	1.4	1.7	1.3	1.38
	2	19	50	1	1.6	1.7	1.4	1.2	1.4	1.6	1.4	1.7	1.2	1.42
	2	20	51	1.3	1.7	1.5	1.7	1.2	1.3	1.7	1.3	1.5	1.4	1.46
	2	21	52	1.3	1.5	1.4	1.5	1.4	1.3	2	1.4	2.4	1.6	1.58
	2	22	53	1	1.4	1.9	1.6	1.5	1.9	2.7	1.8	1.8	2.5	1.81
	2	23	54	1	1	1.6	1.8	1.1	1.7	2.4	1.3	2.1	2	1.6
	2	24	55	1.2	1	1.7	1.4	1	2	2.6	1.1	1.9	2.1	1.6
	2	25	56	1.7	1.1	1.5	1.3	1.1	2	2.4	1.1	2.8	2	1.7
	2	26	57	1.9	1.5	1.1	1.2	1.4	3	3.1	1.6	2.1	3	1.99
	2	27	58	1.7	1.7	1.3	1.5	1.7	1.9	1.5	1.9	1.9	2.2	1.73
	2	28	59	2.5	1.3	1.5	1.4	2	1.8	1.6	1.5	1.3	1.9	1.68
	3	1	60	2	1.3	1.4	1.4	1.9	1.6	1.6	2	1.9	1.9	1.7		Average	1.15161	1.1871	1.1871	1.09032	1.15161	1.37419	1.58387	1.24839	1.46129	1.18387
	3	2	61	1.7	1.6	1.5	1.5	1.3	1.5	1.7	1.8	1.9	1.7	1.62		Total	35.7	36.8	36.8	33.8	35.7	42.6	49.1	38.7	45.3	36.7
	3	3	62	2.2	1.1	1.4	1.4	1.1	1.6	1.9	1.7	2.2	1.5	1.61		Std. Dv.	0.392319	0.289531	0.410481	0.333021	0.302072	0.471853	0.558627	0.264413	0.542019	0.657823
	3	4	63	2.2	1.6	1.7	1.3	1.6	2.1	1.9	2	1.9	1.6	1.79		Std. Error	0.0741413	0.0547161	0.0775736	0.0629351	0.0570862	0.0891718	0.105571	0.0499693	0.102432	0.124317
	3	5	64	1.9	1.7	1.4	1.5	1.5	1.5	2	2.3	2.1	1.9	1.78
	3	6	65	2.7	1.8	2.1	1.8	1.5	1.7	2.1	2.7	1.8	1.9	2.01
	3	7	66	2.2	2.5	2.2	1.8	1.3	1.8	2.3	2.2	1.1	2	1.94
	3	8	67	3.4	2.3	1.1	1.9	1.4	1	2.2	2.2	2.3	2	1.98
	3	9	68	2.6	3.2	2.5	2.4	1.6	2.4	2.8	2	2.1	2.6	2.42
	3	10	69	2.8	2.2	2.3	1.5	1.1	1.9	1.7	1.6	2.5	1.9	1.95
	3	11	70	2.8	2.5	2.6	1.3	2	2.4	1.7	2.5	2.2	1.8	2.18
	3	12	71	1.8	2.8	2.8	2	1.8	2.4	2.1	2.4	2.5	2.4	2.3
	3	13	72	1.7	1.5	2.5	1.4	1.6	2.8	1.7	1.8	2.7	1.9	1.96
	3	14	73	2.3	1.5	2.3	1.3	1.9	2.9	1.6	1.8	1.9	1.8	1.93
	3	15	74	2.4	2.1	2.3	1.3	2.5	2.3	1.4	2.7	2.1	1.1	2.02
	3	16	75	2.4	2.3	2.7	2.2	2.7	2.9	2.3	2.6	2.1	1.9	2.41
	3	17	76	3.2	2.4	2.3	2.4	2.2	2.5	2.1	2.1	1.8	1.9	2.29
	3	18	77	3.4	2	1.8	2.3	2.1	1.9	1.7	2.3	1.6	1.7	2.08
	3	19	78	2.5	2.3	1.1	2.2	2.6	1.5	2.2	2.1	2.7	1.8	2.1
	3	20	79	2.6	1.9	2.1	2.1	2.1	2.8	2.9	2.3	1.8	2.3	2.29
	3	21	80	3.4	2	1.9	2.7	2.1	2.2	2.5	1.8	2.5	1.8	2.29
	3	22	81	4.4	2.3	3.1	2.5	2.3	3.3	3.4	1.8	2.5	1.4	2.7
	3	23	82	3.7	2.4	2.8	2.1	2.5	2.6	2.8	2.2	3.2	1.9	2.62
	3	24	83	3.8	2.3	2.8	2.1	3.2	2.6	3.9	2.4	3	2.9	2.9
	3	25	84	3.3	2.4	3.1	2.6	3.1	2.7	3.6	2.2	2.6	3	2.86
	3	26	85	2.4	2.7	2.8	2.8	2.8	2	3.2	2.8	2.8	3.1	2.74
	3	27	86	2.9	2.7	2.9	2.8	2.9	2.7	3.1	3.1	2.4	3	2.85
	3	28	87	2.2	2.1	2.5	2.5	2.1	2.5	3	2.4	2.2	3	2.45
	3	29	88	3.8	2.7	2.9	2.5	2.2	2.9	2.8	2.6	2.3	2.5	2.72
	3	30	89	3.6	2.1	3.3	2.4	1.6	3.1	1.6	1.9	2.5	2.4	2.45
	3	31	90	3.1	3.1	2.8	2.4	2.6	3.3	2	2.8	2.8	2	2.69
	4	1	91	3.3	1.9	1.4	1.7	2.2	3.7	3	2.4	1.8	2	2.34		Average	2.75484	2.17419	2.29032	2.0129	2.03871	2.30323	2.31613	2.22903	2.25806	2.08387
	4	2	92	3.3	3.4	1.6	3.1	3.1	2.2	2.9	3	2.6	2.4	2.76		Total	85.4	67.4	71	62.4	63.2	71.4	71.8	69.1	70	64.6
	4	3	93	2.9	3.6	2.6	3.3	3.6	3.1	3.2	3.1	3.3	2.2	3.09		Std. Dv.	0.70135	0.502638	0.617174	0.503151	0.581193	0.591317	0.664879	0.374338	0.442549	0.510618
	4	4	94	2.5	3.1	3.4	3	2.9	3.6	3.3	3	1.9	2.9	2.96		Std. Error	0.125966	0.0902765	0.110848	0.0903687	0.104385	0.106204	0.119416	0.0672331	0.0794841	0.0917098
	4	5	95	2.9	2.7	1.9	2.6	3	1.9	3	2.9	3	2.8	2.67
	4	6	96	3.4	2.5	2.8	2.4	3	3.1	3.2	2.8	3.7	2.9	2.98
	4	7	97	3.3	2.5	3	2.1	3.1	4.2	3.6	2.9	3.8	2.2	3.07
	4	8	98	2.5	2.9	3	2.4	3.7	4.2	3.7	3.5	2.9	2.6	3.14
	4	9	99	3	3	2.1	2.4	3.6	2.9	2.8	4.2	3.3	2.2	2.95
	4	10	100	2.8	2.2	2.4	2.5	2.9	2.7	2.6	2.8	2.6	2.4	2.59
	4	11	101	3.6	2.9	2.2	2.2	3.1	2.2	2.4	2.9	3.2	2.2	2.69
	4	12	102	3.9	2.5	3.4	2.6	3.2	3.7	3.4	2.1	3.1	3.1	3.1
	4	13	103	5	3.1	2.9	2.2	3.3	3.4	2.5	2.5	3.2	2.5	3.06
	4	14	104	4.6	3.2	3.3	2.8	3.2	3.7	3.3	2.6	1.7	3.2	3.16
	4	15	105	4.9	3.3	2	2.8	4	2	2.9	3.1	3.2	2.9	3.11
	4	16	106	3.4	3.2	3.5	3.1	3.1	3.3	3	2.9	3.9	2.9	3.23
	4	17	107	3.3	3.2	3.7	3.5	3.6	3.2	3.2	3.7	3.7	3.4	3.45
	4	18	108	4	2.6	3.4	3.5	3.7	3.1	4	3.8	3.7	3.1	3.49
	4	19	109	3.8	3.4	3.7	3.6	4.2	3.1	3.7	4.5	3.7	2.9	3.66
	4	20	110	3.9	3	3.4	3.3	3.8	3.3	3.3	3.9	3.6	3.3	3.48
	4	21	111	4.1	3.5	3.3	3.2	3.5	2.9	3.1	3.8	4.1	3.3	3.48
	4	22	112	4.8	3.5	3.6	2.8	3.5	3	3.4	3.1	3.5	3.7	3.49
	4	23	113	4.5	3.5	2.8	2.7	3.8	3.1	3.6	3.3	2.7	3.8	3.38
	4	24	114	4.8	3.7	2.7	2.6	4.7	2.5	2.9	3	3	2.7	3.26
	4	25	115	4.3	3.5	3.1	3.6	3.8	2.7	4	3.1	4.3	3.5	3.59
	4	26	116	5.3	3.3	4.1	2.8	3.4	4.1	4.1	2.9	4.1	3.2	3.73
	4	27	117	4.8	2.7	4	2.7	3.2	4.1	3.7	2.9	4.3	3.3	3.57
	4	28	118	4.4	3.8	3.6	3.7	3.8	4.5	4.1	3.8	3.7	4.2	3.96
	4	29	119	4.4	3.9	3.2	3.4	4.2	4.1	3.8	4.2	3.5	3.8	3.85
	4	30	120	4.5	4.2	3.5	3.3	5.4	4.1	3.6	5.8	3.9	3.7	4.2
	5	1	121	5.1	4.1	3.9	2.9	4.4	4.4	3.5	4.5	3.3	3.2	3.93		Average	3.84839	3.12581	2.98065	2.84839	3.49032	3.25806	3.26774	3.26774	3.28387	2.94516
	5	2	122	4.9	4.3	2.9	3.2	4.4	3.6	3.5	4.2	3.3	3.3	3.76		Total	119.3	96.9	92.4	88.3	108.2	101	101.3	101.3	101.8	91.3
	5	3	123	5.2	4.4	2.9	3.5	4.1	4.1	4.1	3.7	4.5	3	3.95		Std. Dv.	0.797024	0.511838	0.687711	0.509163	0.617174	0.687883	0.514708	0.732751	0.682689	0.584716
	5	4	124	4.8	4.1	4.3	4.2	4.7	5.5	4.9	4.4	4.4	3.8	4.51		Std. Error	0.145516	0.0934485	0.125558	0.0929601	0.11268	0.12559	0.0939725	0.133782	0.124641	0.106754
	5	5	125	4.1	4.7	4	4.5	4.4	5.6	5.8	4.4	3.1	3.9	4.45
	5	6	126	3.7	3.9	3.2	4	3.8	4	5.1	3.6	3.9	4	3.92
	5	7	127	3.8	3.9	3.9	3.6	3.8	4.1	4.4	3.7	3.5	3.3	3.8
	5	8	128	3	3.7	4.1	3.1	3.6	4.3	4	3.8	4.3	3.1	3.7
	5	9	129	3.6	3.5	4.6	2.5	3.9	4.7	3.4	4.3	4.7	3.1	3.83
	5	10	130	3.3	3	4.8	2.9	3.7	4.7	3.8	3.4	4.3	3.8	3.77
	5	11	131	4.1	3.7	4.2	3.6	4.7	3.7	4	4.4	4.6	4.2	4.12
	5	12	132	4.9	3.1	4.6	2.9	4.3	3.9	3.6	3.8	5	3.9	4
	5	13	133	3	4	4.9	3.4	4.6	3.6	4.1	4.4	5	5.3	4.23
	5	14	134	4.3	4.9	5.2	3.3	5	4	3.6	4.4	4.7	4.2	4.36
	5	15	135	3.9	3.9	4.6	3.3	2.9	3.8	3.6	3	4.7	3.8	3.75
	5	16	136	3.5	4.8	4.6	2.9	4.3	3.8	3.6	4.3	5.1	3.1	4
	5	17	137	4.7	3.9	5	3.3	3.9	4.4	4.4	3.9	5.3	3.9	4.27
	5	18	138	4.5	3.6	4.8	4.8	3.5	4.7	5.8	3.7	5.8	5.2	4.64
	5	19	139	4.7	5	4.9	3.6	4.6	5	4.1	4.8	5.2	4.6	4.65
	5	20	140	5.2	4.9	4.6	4.3	4.2	5.1	4.7	4.5	5.2	4.8	4.75
	5	21	141	5.5	5.2	5	3.9	5	4.3	4.2	5.3	5.1	3.4	4.69
	5	22	142	6	4.9	4.9	4.2	4.4	4.9	4.4	4.6	4.9	4.3	4.75
	5	23	143	6.9	5.1	4.7	3.9	5	4.8	4.1	5.1	5.7	3.2	4.85
	5	24	144	4.6	5.2	4.9	4.6	4.5	5.7	4.4	4.6	4.8	4.1	4.74
	5	25	145	5.1	5.8	4.9	4.7	4.4	5.1	4.7	4.7	3.3	4.2	4.69
	5	26	146	5.2	3.9	3.5	4.3	3.9	3.5	4.4	4.4	4.6	4.1	4.18
	5	27	147	5.8	4.5	5	4.1	4.9	5.1	4.6	5.4	5	4.5	4.89
	5	28	148	5.6	4.6	5	4.7	5.1	5.6	5.6	5.8	5.9	5.5	5.34
	5	29	149	5.5	4.9	6.2	5	5	6.3	6.6	5.2	5.1	6.9	5.67
	5	30	150	5.3	5.2	5.9	5.3	5.2	5.8	6	5.2	5.1	5.7	5.47
	5	31	151	5.3	5.4	5.7	4.9	5.5	5.7	5.8	5.1	4.8	4.8	5.3
	6	1	152	5.6	5.2	5.2	4.7	5	5.3	5.6	5	5	4.6	5.12		Average	4.68065	4.39032	4.57097	3.85161	4.37742	4.63871	4.47742	4.40645	4.65161	4.13548
	6	2	153	5.5	5.2	5.6	5.1	4.9	5.3	5.4	5.1	5.2	4.8	5.21		Total	145.1	136.1	141.7	119.4	135.7	143.8	138.8	136.6	144.2	128.2
	6	3	154	5.2	5.4	5.6	4.8	4.8	5.6	4.5	5.2	5.3	4.8	5.12		Std. Dv.	0.921383	0.700169	0.769499	0.740212	0.580063	0.771439	0.851551	0.644947	0.739311	0.902422
	6	4	155	6.3	5.7	5.2	4.1	5.4	5.2	4.2	5.5	5.6	4.5	5.17		Std. Error	0.165485	0.125754	0.138206	0.132946	0.104182	0.138555	0.152943	0.115836	0.132784	0.16208
	6	5	156	5.1	5.2	6	5.2	5.4	5.6	4.5	5.3	6.9	5.4	5.46
	6	6	157	5.3	6	7.1	6.1	5.8	6.7	6.4	5.7	5.7	7.2	6.2
	6	7	158	5.1	4.8	5.9	4.6	6.3	5.4	4.7	6	4.8	5	5.26
	6	8	159	5.8	5	4.7	4.5	6.4	4.6	4.3	6.6	4.7	4.5	5.11
	6	9	160	6	5	5.1	4.5	5.8	4.9	4.4	6.1	5.3	4.6	5.17
	6	10	161	6.5	5.7	5.4	4.4	6.2	5.3	4.6	6.4	5.5	4.7	5.47
	6	11	162	5.6	5.2	5.6	4.4	5.6	5.7	5.3	5.3	6.7	5	5.44
	6	12	163	5.5	6.4	6.5	4.6	7.2	7	6.1	6.7	6.4	6.1	6.25
	6	13	164	5.5	6.2	6.7	5.4	6.4	7.1	5.9	6.1	5.9	6.3	6.15
	6	14	165	6.2	5.9	6.2	5	5.8	6.2	5.5	5.6	5.7	5.5	5.76
	6	15	166	6.3	5.8	6	4.3	5.7	5.6	4.7	5.5	5.9	4.3	5.41
	6	16	167	6	6.3	6	5	6.4	5.8	5.2	5.8	6	4.9	5.74
	6	17	168	7.2	6.3	6.4	5.6	7.4	6.3	5.7	6.7	6.9	5.3	6.38
	6	18	169	7.7	5.9	7.2	6.5	7.1	7.4	7	6.8	7.6	6.5	6.97
	6	19	170	7.3	6.8	8.2	7.7	7.5	7.6	8.4	7.9	6.6	7.7	7.57
	6	20	171	8.2	7	6.9	6	7.4	6.7	6.5	7.3	6.5	5.9	6.84
	6	21	172	6.9	6.6	6.5	6	6.7	6.4	6.4	6.4	5.6	5.6	6.31
	6	22	173	5.4	8.3	5.7	5.2	7	5.5	5.1	6.7	5.8	4.7	5.94
	6	23	174	6.5	7.1	5.8	5.1	5.6	5.7	5.1	5.4	5.6	4.9	5.68
	6	24	175	8.1	5.5	5	5.4	6.3	5.6	5.4	6.3	5.4	5.4	5.84
	6	25	176	7.1	6.5	4.8	4.8	6.2	5.3	4.9	6.1	5.7	4.9	5.63
	6	26	177	6.4	7.8	5.3	5.1	7.3	5.6	5.3	7	6.3	5.4	6.15
	6	27	178	6.1	6.9	6.2	5.8	7.1	6.3	5.9	6.5	6.9	6.2	6.39
	6	28	179	7.1	6.1	6.9	6.4	6.1	7	6.5	5.9	7.5	6.9	6.64
	6	29	180	7	5.9	7.5	6.9	6.9	7.8	7.1	6.9	6.1	7.7	6.98
	6	30	181	7.2	7	5.8	5.3	6.1	6.1	5.7	6.1	6	6	6.13
	7	1	182	7.9	7.2	6.2	6	6.7	6.3	6.3	7	5.9	6.5	6.6		Average	6.29032	6.06774	6.02258	5.27097	6.23548	6.00968	5.55161	6.09677	5.93226	5.4871
	7	2	183	8.2	7.3	5.8	5.3	7.1	5.9	5.8	7.2	4.5	6	6.31		Total	195	188.1	186.7	163.4	193.3	186.3	172.1	189	183.9	170.1
	7	3	184	7.2	7.7	4.5	4.9	6.9	4.5	5.1	7.3	6.3	5.3	5.97		Std. Dv.	0.893068	0.841977	0.824504	0.828329	0.779123	0.81296	0.947231	0.716233	0.754271	0.946834
	7	4	185	7.6	8.1	6.4	5.9	6.9	6.4	6.2	7.5	6.9	6.6	6.85		Std. Error	0.163051	0.153723	0.150533	0.151232	0.142248	0.148425	0.17294	0.130766	0.13771	0.172867
	7	5	186	7	7.1	6.9	6.1	5.8	7	6.7	6.2	5.9	7.2	6.59
	7	6	187	6	7.6	6	5.4	5.8	5.8	5.4	6.1	4.9	5.8	5.88
	7	7	188	6.8	6.8	4.9	4.5	7.4	4.7	4.5	7.5	5.7	4.6	5.74
	7	8	189	8	6.1	5.8	5.2	8.6	5.7	5.3	8.5	6.4	5.2	6.48
	7	9	190	7.6	7	6.4	5.9	6.7	6.3	5.9	6.6	6	5.9	6.43
	7	10	191	7.1	8.6	6.2	5.7	5.9	6.1	5.7	5.7	5.7	5.8	6.25
	7	11	192	7.3	7.8	5.8	5.2	7.3	5.9	5.2	7.2	5.5	5.4	6.26
	7	12	193	6.9	7.2	5.8	5.2	7.5	5.6	5.2	7.4	5.3	5.4	6.15
	7	13	194	7.2	6.9	5.5	5	6.7	5.4	5.1	6.5	6.2	5.3	5.98
	7	14	195	6	6	5.7	4.9	7.3	6.1	5.7	7	6	5.8	6.05
	7	15	196	6.4	6.2	5.7	5.2	8.8	6	5.9	8.2	5.8	6.1	6.43
	7	16	197	6.5	5.7	5.9	5.4	8.4	5.9	5.5	7.9	5.2	5.8	6.22
	7	17	198	6.8	5.8	5.3	4.7	8.1	5.2	4.7	7.6	5.2	4.9	5.83
	7	18	199	6.9	6.1	5.2	4.7	7.2	5.2	4.7	7	5.5	5	5.75
	7	19	200	6.9	6.5	5.5	4.9	6.2	5.5	4.9	6.1	5.7	5.2	5.74
	7	20	201	6.2	6.6	5.5	4.6	5.8	5.4	4.7	5.4	5.2	4.9	5.43
	7	21	202	6.3	6.5	5.3	4.6	5.4	5.2	4.7	5.3	5.4	5	5.37
	7	22	203	6.5	6.7	5.5	5	6.4	5.4	5	5.9	7.2	5.5	5.91
	7	23	204	6.2	6.2	7.3	6.8	5.8	7.3	6.7	6.3	8	7.2	6.78
	7	24	205	6.9	6.2	7.9	7.4	5.3	7.9	7.7	4.9	6.7	7.7	6.86
	7	25	206	5.6	6	6.6	6.1	5.8	6.6	6.3	5.4	6.6	6.3	6.13
	7	26	207	5.6	5.7	6.7	6.5	5.4	6.8	6.8	5.4	5.3	6.9	6.11
	7	27	208	6	6.7	5.4	5.4	5.5	5.4	5.6	5.2	5.8	5.9	5.69
	7	28	209	5.8	5.6	6	5.9	6.8	5.9	6.1	6.2	6.3	6.5	6.11
	7	29	210	6.9	5.4	6.7	7	5.8	6.3	6.8	6	6.2	6.9	6.4
	7	30	211	6.7	5.8	6.1	5.8	5.6	6.1	5.8	5	6.1	6	5.9
	7	31	212	5.9	5.7	6.2	5.5	5.3	6	5.7	4.9	4.4	6	5.56
	8	1	213	5.3	6.3	4.4	4.7	4.8	4.4	4.7	4.9	5.3	5	4.98		Average	6.73871	6.60645	5.95806	5.50645	6.5871	5.92903	5.66774	6.46452	5.86452	5.89032
	8	2	214	5.1	5.8	5.1	5.3	5.9	5.5	5.4	5.8	6	5.8	5.57		Total	208.9	204.8	184.7	170.7	204.2	183.8	175.7	200.4	181.8	182.6
	8	3	215	5.6	5.4	5.7	5.5	6.9	6	5.8	6.9	5.6	6.3	5.97		Std. Dv.	0.694107	0.807026	0.698462	0.73118	1.0102	0.718421	0.768283	1.01868	0.755226	0.769569
	8	4	216	6.7	4.9	5.4	5.4	6.6	5.5	5.5	6.6	5.8	5.8	5.82		Std. Error	0.124665	0.144946	0.125448	0.131324	0.181436	0.129032	0.137988	0.182959	0.135643	0.138219
	8	5	217	6.3	5	5.8	5.4	5.8	6	5.7	5.9	6.8	5.9	5.86
	8	6	218	6	5.3	5.9	5.4	5.9	7	5.9	5.8	6.5	6.9	6.06
	8	7	219	6.1	5.9	5.6	5.4	6.8	6.9	6.5	6.7	6.5	7	6.34
	8	8	220	6.5	5.4	5.6	5.2	5.1	6.6	6.2	5.1	5.7	6.8	5.82
	8	9	221	5.5	5.3	5.5	5.2	5.4	6	5.6	5.4	5.4	6.3	5.56
	8	10	222	5	5.6	5.4	5	5.3	5.5	5.1	5.4	6.2	5.6	5.41
	8	11	223	5.5	6	6.1	5.8	5.3	6.4	6	5.4	5.6	6.6	5.87
	8	12	224	5	5.1	5.5	5.1	5.2	5.7	5.3	5.1	5.3	5.7	5.3
	8	13	225	4.7	4.8	5.1	4.5	5.6	5.3	4.9	5.6	6.3	5.2	5.2
	8	14	226	5.3	5.1	6	5.5	5.5	6.3	6.1	5.5	6.6	6.1	5.8
	8	15	227	5.4	4.8	6	5.6	4.9	6.5	6.4	4.9	5.8	6.4	5.67
	8	16	228	5	4.6	5	4.8	5	5.9	5.6	4.9	6.2	5.5	5.25
	8	17	229	5.7	5.3	5.4	5.2	6	6.3	6.1	6.1	5.7	6.2	5.8
	8	18	230	5.4	5.4	4.9	4.7	6.3	5.9	5.7	6.3	4.8	5.8	5.52
	8	19	231	5.8	5	4.5	4	5.7	4.9	4.6	5.8	5.2	4.6	5.01
	8	20	232	4.1	4.6	4.3	3.7	4.7	5.3	4.6	4.7	5	4.7	4.57
	8	21	233	3.5	4.7	4.8	4.3	4.2	5.2	4.7	4.3	5.3	4.8	4.58
	8	22	234	4.5	4.8	4.9	4.7	4.3	5.3	5.1	4.5	5	5.2	4.83
	8	23	235	4.3	3.7	4.8	3.9	5	4.9	4.3	5	5.4	4.2	4.55
	8	24	236	4.8	3	5	3.4	4.2	5.5	4.5	3.7	4.7	4.6	4.34
	8	25	237	4.9	4.1	4.5	2.5	4.2	4.7	3.6	4	5.3	3.6	4.14
	8	26	238	5.6	3.9	4.8	4	4.4	5.5	5.1	4.1	5.7	5.3	4.84
	8	27	239	5.7	4.1	4.6	3.7	4.5	5.8	5.3	4.2	5.1	5.4	4.84
	8	28	240	5.5	4.1	4.4	3.5	4.1	5.2	4.8	3.9	4.7	4.7	4.49
	8	29	241	4.4	4.4	4.4	3.3	4	4.7	4	3.9	4	4.1	4.12
	8	30	242	5.1	4.7	3.5	3.4	4.6	4.1	4	4.6	4.3	4	4.23
	8	31	243	5.4	4.8	4.1	3.5	4.4	4.3	4	4.4	4.5	3.9	4.33
	9	1	244	5.3	4.2	4.2	4	4.4	4.4	4.4	4.4	4.5	4.5	4.43		Average	5.28065	4.9	5.06452	4.56774	5.18065	5.58387	5.19677	5.14194	5.49355	5.41935
	9	2	245	5.3	4.7	4.5	4	4.1	4.5	4.3	4.1	4.5	4.2	4.42		Total	163.7	151.9	157	141.6	160.6	173.1	161.1	159.4	170.3	168
	9	3	246	4.3	4.7	4.4	3.8	4.4	4.6	4.3	4.5	4.5	4.5	4.4		Std. Dv.	0.699247	0.714609	0.636945	0.874981	0.823172	0.739413	0.772219	0.87779	0.694711	0.935742
	9	4	247	3.8	4.8	4.3	3.8	4.3	4.8	4.5	4.3	4.1	4.9	4.36		Std. Error	0.125588	0.128348	0.114399	0.157151	0.147846	0.132802	0.138695	0.157656	0.124774	0.168064
	9	5	248	4.5	4.5	3.9	3.8	4.4	4.2	4.5	4.4	3.9	4.9	4.3
	9	6	249	3.9	4.1	3.7	3.5	4.4	4	4.2	4.6	4.4	4.2	4.1
	9	7	250	4.4	3.7	3.9	3.6	5.1	4.5	4.5	4.9	4.3	4.5	4.34
	9	8	251	5.3	4.2	3.6	3.2	5.9	4.2	4.1	5.7	4.3	4.2	4.47
	9	9	252	4.2	3.5	3.5	2.9	5.3	4.3	3.9	5.2	3.7	4.3	4.08
	9	10	253	4	3.8	3.2	3.2	4.3	3.6	3.8	4.3	3.8	4	3.8
	9	11	254	3.3	4.1	3.7	2.9	4.1	3.7	3.4	4.1	3.6	3.6	3.65
	9	12	255	3.8	3.9	3.7	2.7	3.7	3.5	3.1	3.6	4.4	3.3	3.57
	9	13	256	3.7	4	4.1	4	3.6	4.4	4.3	3.6	4.1	4.5	4.03
	9	14	257	3.2	3.1	3.8	3.9	4	4.2	4	4.1	3.6	4.1	3.8
	9	15	258	3.9	3.6	3.5	3.6	3.1	3.7	3.6	3.3	3.3	3.9	3.55
	9	16	259	4.2	3.5	3.4	3.4	3.6	3.4	3.3	3.6	3.9	3.6	3.59
	9	17	260	3.8	3.3	4.1	4	4.8	3.8	3.8	4.8	3.9	4.2	4.05
	9	18	261	4.3	2.9	4.3	4.4	2.9	3.8	3.9	2.8	4.4	4.4	3.81
	9	19	262	2.9	3.6	4.7	4.6	3.1	4.2	4.5	3.2	2.9	4.7	3.84
	9	20	263	3.3	3.6	3.1	3	3.2	2.8	2.9	3.3	2.9	3.3	3.14
	9	21	264	3.4	3.3	3	2.9	3.1	2.9	2.8	3.1	2.7	3.2	3.04
	9	22	265	3.2	3.6	2.9	2.7	3.2	2.7	2.7	3.3	2.8	2.8	2.99
	9	23	266	2.7	2.4	2.6	2.5	2.7	2.7	2.8	2.8	3.1	2.8	2.71
	9	24	267	2.9	3.2	3.2	2.6	4.3	2.9	2.8	4.5	2.3	2.9	3.16
	9	25	268	3.1	3.5	2.7	1.8	3.7	2.7	1.9	3.8	2.5	2.1	2.78
	9	26	269	2.8	3.2	2.4	2.6	2.7	2.6	2.7	2.8	3.3	3	2.81
	9	27	270	2.6	2.5	3.4	2.5	2.5	3.5	3.1	2.5	3.7	3.2	2.95
	9	28	271	2.5	3	3.8	2.6	2.7	3.7	1.7	2.8	2.8	2.7	2.83
	9	29	272	2.7	3	2.9	2.6	3	2.8	2	3.1	2.9	2.6	2.76
	9	30	273	3.1	2.8	3.2	2.1	2.8	3.1	2	2.8	2.5	2.3	2.67
	10	1	274	2.6	2.6	2.2	2.4	3.1	2.5	2.6	3.3	2.8	3.1	2.72		Average	3.73548	3.64839	3.60645	3.24839	3.8	3.69355	3.47742	3.82903	3.61613	3.71935
	10	2	275	2.6	2.6	2.8	2.4	2.8	2.9	2.8	3	2.5	2.9	2.73		Total	115.8	113.1	111.8	100.7	117.8	114.5	107.8	118.7	112.1	115.3
	10	3	276	2.7	3	1.9	2.5	2.8	2.4	3	2.8	2.2	2.8	2.61		Std. Dv.	0.845596	0.654151	0.590444	0.692758	0.859845	0.677218	0.863215	0.819021	0.708565	0.794321
	10	4	277	2.8	3.2	1.7	2.3	3	1.9	2.7	2.9	2.4	2.4	2.53		Std. Error	0.154384	0.119431	0.1078	0.12648	0.156985	0.123642	0.157601	0.149532	0.129366	0.145023
	10	5	278	2.4	2.8	1.8	2	3	2	2.4	2.8	2.7	2.3	2.42
	10	6	279	2.5	2.8	1.7	2	3	2	2.6	2.8	2.7	2.5	2.46
	10	7	280	2.4	2.8	2	2.4	2.7	2.2	2.8	2.6	2.5	2.7	2.51
	10	8	281	2.5	2.7	1.8	2.4	2.4	2.2	2.7	2.4	2.4	2.7	2.42
	10	9	282	2.4	2.5	2.1	2.4	2.5	2.2	2.5	2.3	2	2.4	2.33
	10	10	283	2.3	2.6	1.7	2	2.9	1.9	2.1	2.8	1.6	2	2.19
	10	11	284	2.6	2.4	1.1	1.9	2.4	1.6	1.9	2.4	2.2	1.8	2.03
	10	12	285	3.2	2.5	1.7	1.9	2.5	2.2	1.9	2.3	2.2	2	2.24
	10	13	286	3.3	2.6	1.7	2.1	2.3	2.2	2.2	2.5	2.3	2.1	2.33
	10	14	287	2.6	2.1	1.7	1.8	2.3	2.2	2	2.3	2.9	2.1	2.2
	10	15	288	2.4	2.1	2	1.8	2.8	2.9	2.1	2.5	2.4	2.1	2.31
	10	16	289	3.6	2.8	2.2	1.7	3.3	2.5	1.4	3.1	2	1.4	2.4
	10	17	290	2.1	3.7	2.2	2.1	3.3	2.2	1.5	3	1.7	1.5	2.33
	10	18	291	1.8	2.5	2	1.9	2.3	2.1	1.7	2.2	1.5	1.8	1.98
	10	19	292	1.9	2.8	1.6	1.6	2.6	1.6	1.6	2.4	1.5	1.7	1.93
	10	20	293	1.9	2.8	1.5	1.4	2.6	1.9	1.5	2.5	1.7	2.1	1.99
	10	21	294	1.7	2.2	2.3	1.7	1.8	2.6	2	1.9	1.9	2.5	2.06
	10	22	295	1.8	1.8	2	1.7	1.3	1.9	1.6	1.4	1.5	2	1.7
	10	23	296	1.6	2	1.6	1.5	2	1.5	1.4	1.6	1.5	1.5	1.62
	10	24	297	1.6	1.8	1.6	1.4	1.7	1.5	1.3	1.8	1.6	1.5	1.58
	10	25	298	1.8	1.8	1.7	1.5	1.6	1.6	1.5	1.6	1.6	1.7	1.64
	10	26	299	1.8	1.9	1.7	1.5	1.4	1.7	1.6	1.6	1.7	1.7	1.66
	10	27	300	1.7	1.6	1.8	1.3	1.8	1.7	1.4	1.6	1.5	1.6	1.6
	10	28	301	1.7	1.6	1.6	1.3	1.9	1.5	1.4	1.3	1.6	1.3	1.52
	10	29	302	1.6	1.7	1.8	1.5	1.9	1.8	1.6	1.3	1.8	1.5	1.65
	10	30	303	1.4	1.4	1.3	0.9	2.1	2.5	2	1.5	1.3	2	1.64
	10	31	304	2.3	1.6	1.2	1.2	2.2	1.4	1.2	1.6	1.4	1.2	1.53
	11	1	305	1.8	1.6	1.3	1.2	2.8	1.5	1.2	1.9	1.2	1.2	1.57		Average	2.24516	2.36452	1.80645	1.82258	2.39677	2.04194	1.96774	2.26129	1.9871	2.02903
	11	2	306	1.8	1.5	1.3	1.2	2.5	1.4	1.2	1.6	1.1	1.2	1.48		Total	69.6	73.3	56	56.5	74.3	63.3	61	70.1	61.6	62.9
	11	3	307	1.8	1.3	1.3	1.1	2.4	1.6	1.2	2	1.1	1.3	1.51		Std. Dv.	0.548233	0.548056	0.337575	0.419293	0.547408	0.407246	0.531907	0.591426	0.471693	0.502125
	11	4	308	1.6	1.9	1.4	1.2	1.6	1.5	1.2	1.6	1.2	1.3	1.45		Std. Error	0.0984655	0.0984338	0.0606303	0.0753072	0.0983174	0.0731436	0.0955333	0.106223	0.0847186	0.0901842
	11	5	309	1.2	1.5	1.2	1.1	1.4	0.9	1.3	1.2	1.2	1.4	1.24
	11	6	310	1.2	1.6	1.4	1.2	1.4	1.3	1.4	1.3	1.3	1.3	1.34
	11	7	311	1.2	1.6	1.3	1.1	1.6	1.4	1.4	1.7	1.2	1.4	1.39
	11	8	312	1.2	1.3	1.1	0.9	1.5	1.1	1.2	1.4	1.3	1.2	1.22
	11	9	313	1	1.2	0.9	0.8	2.2	0.8	1.3	1.8	1.9	1.3	1.32
	11	10	314	1.1	1.3	1.6	1.3	1.4	1.5	2	1.1	2	1.7	1.5
	11	11	315	1.3	1.2	1.5	1	1.7	1.3	1.7	1.6	1.6	1.8	1.47
	11	12	316	1.3	1.4	1.6	1.1	1.5	1.1	1.4	1.4	1.4	1.5	1.37
	11	13	317	1	1.1	1.3	0.9	1	1	1.4	1	1	1.3	1.1
	11	14	318	1.1	1.2	1.1	0.6	1.1	1	1.1	1	1.1	1	1.03
	11	15	319	1.4	1.2	1.1	0.8	1.1	1	1.2	1.1	1	1.1	1.1
	11	16	320	1.3	1.1	1	0.9	1	1	1.1	0.9	1	1	1.03
	11	17	321	1.4	0.9	1	0.9	1	0.9	0.9	0.9	1.1	1	1
	11	18	322	1.3	1.1	1.2	0.9	0.9	1.1	0.9	0.8	0.9	1.2	1.03
	11	19	323	1	0.8	0.9	0.8	0.7	1	0.8	0.7	0.8	0.9	0.84
	11	20	324	0.9	0.9	0.9	0.7	0.9	0.9	0.6	1	0.9	0.7	0.84
	11	21	325	0.9	1.2	1	0.8	1.1	1	0.7	1	0.9	0.9	0.95
	11	22	326	0.8	1.2	1.1	0.9	1.1	0.8	0.7	0.9	0.8	0.8	0.91
	11	23	327	0.8	1.1	1	0.9	0.9	0.9	0.7	1	0.9	0.7	0.89
	11	24	328	0.9	0.8	1.6	1.4	0.9	1.1	0.8	0.8	1.3	0.7	1.03
	11	25	329	0.7	0.8	1.6	1.2	0.8	0.9	0.8	0.8	0.8	1.1	0.95
	11	26	330	0.8	0.8	1	0.8	0.9	0.8	0.6	0.9	0.8	0.8	0.82
	11	27	331	0.7	0.6	0.9	0.8	0.8	0.9	0.7	0.8	1.1	0.8	0.81
	11	28	332	0.7	0.6	1.1	0.8	0.7	1.1	0.7	0.7	0.9	1.1	0.84
	11	29	333	0.7	0.8	1.2	1	1	0.8	0.6	0.8	0.7	0.9	0.85
	11	30	334	0.6	0.7	0.9	0.8	0.7	0.8	0.6	0.8	0.7	0.7	0.73
	12	1	335	0.5	0.8	0.9	0.8	0.8	0.7	0.5	1.1	0.8	0.7	0.76		Average	1.15484	1.15806	1.19355	0.977419	1.31613	1.09032	1.05161	1.16452	1.11613	1.1129
	12	2	336	0.6	0.7	1.2	1	0.8	0.7	0.7	0.9	0.8	0.8	0.82		Total	35.8	35.9	37	30.3	40.8	33.8	32.6	36.1	34.6	34.5
	12	3	337	0.5	0.8	1.6	1.2	0.8	0.8	0.8	0.9	0.6	1.1	0.91		Std. Dv.	0.398195	0.33244	0.227941	0.196146	0.573351	0.246786	0.353903	0.386047	0.313153	0.288377
	12	4	338	0.7	0.7	0.7	0.6	0.6	0.6	0.7	0.8	0.7	0.8	0.69		Std. Error	0.0727001	0.0606949	0.0416161	0.0358111	0.104679	0.0450567	0.0646135	0.0704822	0.0571736	0.0526502
	12	5	339	0.6	0.6	0.9	0.6	0.9	0.7	0.8	1.3	0.7	0.9	0.8
	12	6	340	0.6	0.8	1.2	0.8	0.9	0.9	0.6	1.7	0.6	1.1	0.92
	12	7	341	0.6	0.6	0.9	0.6	0.7	0.7	0.7	1	0.6	0.8	0.72
	12	8	342	0.6	0.7	0.9	0.8	0.6	0.6	0.7	0.7	0.7	0.8	0.71
	12	9	343	0.9	0.7	0.9	0.8	0.6	0.5	0.8	0.6	0.7	0.9	0.74
	12	10	344	0.8	0.6	0.9	0.7	0.7	0.4	1	0.7	0.6	1	0.74
	12	11	345	0.9	0.6	0.8	0.6	0.5	0.4	0.7	0.6	0.7	0.7	0.65
	12	12	346	1	0.6	0.8	0.6	0.6	0.4	0.7	0.6	0.7	0.7	0.67
	12	13	347	1.1	0.7	0.8	0.7	0.6	0.4	0.6	0.6	0.6	1	0.71
	12	14	348	0.9	0.8	0.7	0.6	0.7	0.4	0.7	1	0.5	1	0.73
	12	15	349	1	0.7	0.7	0.7	0.5	0.4	0.7	0.6	0.6	0.8	0.67
	12	16	350	1	0.7	0.7	0.7	0.5	0.3	0.6	0.5	0.6	0.7	0.63
	12	17	351	0.9	1.3	0.9	0.8	0.6	0.3	0.5	0.7	0.6	0.7	0.73
	12	18	352	0.9	1.3	1.2	0.9	0.6	0.4	0.6	0.9	0.5	1	0.83
	12	19	353	1	1.1	1.1	1	0.6	0.4	0.7	1.1	0.7	0.8	0.85
	12	20	354	1	1.3	1.5	1.1	0.7	0.3	0.9	0.7	0.6	1.3	0.94
	12	21	355	1.2	1.1	1.4	1.3	0.7	0.4	0.5	0.7	0.5	1.4	0.92
	12	22	356	0.7	1	0.8	1	0.7	0.4	0.5	0.7	0.5	0.8	0.71
	12	23	357	0.6	1.1	0.8	1	0.6	0.3	0.5	0.6	0.5	0.9	0.69
	12	24	358	0.8	1	0.8	1	0.6	0.3	0.5	0.7	0.5	1	0.72
	12	25	359	0.7	1.3	0.7	0.9	0.6	0.3	0.6	0.6	0.6	0.7	0.7
	12	26	360	0.9	1.3	0.9	1	0.5	0.3	0.4	0.6	0.7	0.9	0.75
	12	27	361	1	0.9	1	1	0.6	0.5	0.5	0.6	0.7	0.8	0.76
	12	28	362	1	0.7	1	1	0.6	0.4	0.7	0.6	0.6	0.7	0.73
	12	29	363	0.9	0.8	0.9	0.9	0.6	0.3	0.5	0.5	0.9	0.6	0.69
	12	30	364	1.2	0.7	1.2	1.4	0.6	0.5	1	0.4	0.8	0.6	0.84
	12	31	365	1.1	0.9	1.1	1.2	0.6	0.4	0.5	0.4	0.8	0.5	0.75
																Average	0.845161	0.867742	0.964516	0.880645	0.645161	0.464516	0.651613	0.754839	0.645161	0.854839
			TOTAL	1203.2	1137.3	1113.8	1004	1158.5	1132.6	1098.5	1147.1	1130.2	1090.5	1121.57		Total	26.2	26.9	29.9	27.3	20	14.4	20.2	23.4	20	26.5
																Std. Dv.	0.203041	0.242744	0.237414	0.219726	0.105952	0.16643	0.150269	0.274273	0.105952	0.198055
																Std. Error	0.0364673	0.0435981	0.0426409	0.039464	0.0190295	0.0298917	0.026989	0.0492609	0.0190295	0.0355717
