# Supplementary material for: Assessing of evapotranspiration models using limited climatic data in Southeast Anatolian Project Region of Turkey
Source: PeerJ. 2021 Jun 9;9:e11571. doi: 10.7717/peerj.11571 (PMC8197036; doi:10.7717/peerj.11571)
Supplement: Supplemental Information 5 [file peerj-09-11571-s005.xlsx]

## Sheet: 2008
	KİLİS					year	month	day	DOY	Tmax	Tmin	Tmean	RHmean	Ra	Rs=0.16(Tmax-Tmin)^0.5*Ra	Rs=from meteorological station	ETo-HS	ETo-TURC (Ousman Couly (2016)
	DOY	246					#	#		°C	°C	°C	%	MJ m-2 day-1*(0.408 mm day-1)
	φ (-)	36.71	0.64071			2008	1	1	1	6.9	0.8	3.85	73.5	16.9739	8.28324	6.70757	0.851709	0.656789
	tan(φ)		0.745649			2008	1	2	2	8.8	2.3	5.55	83	15.0268	7.81395	6.12977	0.839458	0.829185
	sin(φ)		0.597765			2008	1	3	3	9.9	1.8	5.85	83	11.2268	7.27497	5.11233	0.709117	0.81455
	cos(φ)		0.801671			2008	1	4	4	5.8	3.7	4.75	76	11.3766	1.91127	2.63781	0.348866	0.298323
	dr	0.984766		(1+0.033*cos(2*3.14/365*DOY))		2008	1	5	5	6.2	-1.2	2.5	81.5	19.4224	11.4981	8.45355	1.00648	0.601758
	δ	0.120494		(0.409*sin(2*3.14/365*DOY-1.39))		2008	1	6	6	10	-0.2	4.9	91	17.256	14.0809	8.81782	1.17397	1.23435
	tan(δ)	0.121081				2008	1	7	7	10	-1.2	4.4	56	15.2948	13.7041	8.18977	1.06633	1.11047
	sin(δ)	0.120203				2008	1	8	8	5.4	-0.5	2.45	71	14.0271	6.62079	5.45147	0.647451	0.379132
	cos(δ)	0.992749				2008	1	9	9	5.8	-3.3	1.25	80.5	16.4475	11.9738	7.93855	0.886961	0.335368
	X	0.991849				2008	1	10	10	4.2	-1.4	1.4	72.5	18.1135	8.11486	6.85831	0.7723	0.270055		-
	ωs (eq. 25)	1.49314		(acos{(-1*tan(-0.35)*tan(0.409*sin(2*3.14/365*DOY-1.39))))		2008	1	11	11	7.5	-1.3	3.1	56	19.8483	13.9732	9.42075	1.15478	0.85286
	sin ωs	0.996986				2008	1	12	12	6.4	-2.6	1.9	58	18.7194	13.478	8.9853	1.03817	0.542575
	sin φ*sin δ	-0.0718532		(sin(0.35)*sin(0.409*sin(2*3.14/365*DOY-1.39)))		2008	1	13	13	6.5	-2	2.25	64	19.9532	13.5682	9.3077	1.09452	0.633135
	cos φ*cos δ	0.795859		(cos(0.35)*cos(0.409*sin(2*3.14/365*DOY-1.39))		2008	1	14	14	8.4	-3.1	2.65	66	18.3967	16.925	9.98181	1.19721	0.885031
	Gsc	0.082				2008	1	15	15	10.7	-2	4.35	63	16.7203	16.9878	9.5338	1.23853	1.32953
						2008	1	16	16	4.4	-1.2	1.6	67.5	9.24475	4.14165	3.50033	0.398271	0.186199
	Ra	25.4105				2008	1	17	17	8.5	-1	3.75	61.5	17.7022	13.4537	8.72989	1.10338	0.963708
						2008	1	18	18	10.2	1.4	5.8	66.5	22.5477	15.8736	10.702	1.4813	1.55281
						2008	1	19	19	11.4	1.4	6.4	66	18.3049	14.6439	9.26164	1.31453	1.55141
						2008	1	20	20	11.4	3.6	7.5	76.5	21.8319	13.6231	9.75571	1.4476	1.62369
						2008	1	21	21	12.6	1	6.8	86.5	18.3941	17.0697	10.0237	1.44621	1.85269
						2008	1	22	22	10.6	0.1	5.35	74.5	17.9768	15.1006	9.32026	1.26546	1.40101
						2008	1	23	23	12.4	1.4	6.9	61	13.9419	12.2689	7.39843	1.07178	1.40245
						2008	1	24	24	15.4	3.1	9.25	58.5	17.3929	17.1146	9.7599	1.54839	2.2709
						2008	1	25	25	12.4	3.2	7.8	68.5	20.1109	14.8016	9.7599	1.46539	1.7914
						2008	1	26	26	11.7	5.2	8.45	65.5	20.9698	10.9043	8.55404	1.31695	1.45154
						2008	1	27	27	12	0.5	6.25	63	18.7517	17.2516	10.1744	1.43513	1.76349
						2008	1	28	28	6	1.8	3.9	67.5	14.8632	4.99402	4.87367	0.620274	0.453153
						2008	1	29	29	7.2	4	5.6	57	4.19114	1.07293	1.19958	0.164631	0.266546
						2008	1	30	30	6.4	0.1	3.25	54.5	25.9187	13.063	10.4089	1.28506	0.836531
						2008	1	31	31	7.2	-1.1	3.05	53.5	23.4077	15.5427	10.7899	1.31945	0.923641
						2008	2	1	32	9.8	-1.2	4.3	56.5	21.3982	18.8304	11.3551	1.47181	1.44492
						2008	2	2	33	11	0	5.5	63	20.9839	18.4658	11.1353	1.52169	1.70965
						2008	2	3	34	12.6	-0.2	6.2	61	20.9191	21.4212	11.9748	1.68558	2.13154
						2008	2	4	35	12	1.8	6.9	54.5	24.2003	19.7474	12.3663	1.79145	2.13289
						2008	2	5	36	10.9	3.2	7.05	54.5	27.9899	17.2418	12.427	1.81118	1.91608
						2008	2	6	37	11.8	3.6	7.7	61	28.1284	18.4522	12.8876	1.92744	2.1601
						2008	2	7	38	12.1	3.3	7.7	55.5	25.6705	18.072	12.1842	1.82223	2.12012
						2008	2	8	39	11.5	5	8.25	55.5	21.755	11.3126	8.87435	1.35585	1.47429
						2008	2	9	40	12.9	4.8	8.85	56.5	19.8055	12.834	9.0188	1.40966	1.71673
						2008	2	10	41	15.2	7	11.1	61	23.221	15.233	10.6392	1.80332	2.28384
						2008	2	11	42	12.9	6.8	9.85	86	16.2216	7.91613	6.4103	1.03954	1.22953
						2008	2	12	43	12.5	5.8	9.15	79.5	21.1397	11.3309	8.75502	1.38383	1.57633
						2008	2	13	44	10.8	5.3	8.05	69	22.2275	9.78011	8.3405	1.26451	1.28511
						2008	2	14	45	8.6	2.6	5.6	60.5	15.8327	7.59971	6.20513	0.851599	0.816569
						2008	2	15	46	10.8	0	5.4	63	25.8953	22.3736	13.6161	1.85272	2.00745
						2008	2	16	47	7	0	3.5	54	8.48636	4.75236	3.59245	0.448785	0.401295
						2008	2	17	48	7	2.9	4.95	52.5	8.8399	2.89949	2.86391	0.382128	0.383778
						2008	2	18	49	9.8	3.4	6.6	53	12.8784	6.59375	5.21281	0.745985	0.822544
						2008	2	19	50	4.5	0	2.25	55.5	36.268	13.0565	12.3098	1.44755	0.612445
						2008	2	20	51	8.5	-0.7	3.9	53.5	30.0757	22.1358	14.5959	1.85763	1.54968
						2008	2	21	52	10.7	0.2	5.45	60.5	25.1967	21.1652	13.0634	1.78135	1.92125
						2008	2	22	53	13.1	2.6	7.85	57.5	26.0446	21.8775	13.5031	2.03137	2.55251
						2008	2	23	54	13.8	4	8.9	58	29.2158	22.9052	14.6336	2.29155	2.88542
						2008	2	24	55	11.5	7.1	9.3	78	17.7027	6.23134	5.94135	0.944328	0.987261
						2008	2	25	56	13.8	6.5	10.15	85.5	19.187	11.2052	8.29445	1.35968	1.66335
						2008	2	26	57	15	5	10	73	18.0856	14.4685	9.15069	1.49199	2.05326
						2008	2	27	58	18.2	3.8	11	57	24.4811	28.2022	14.8638	2.51068	3.97293
						2008	2	28	59	17.3	6.4	11.85	55.5	23.8423	20.7905	12.5945	2.19015	3.1304
						2008	3	1	60	17.8	9.9	13.85	50	28.5271	18.0292	12.829	2.38141	2.99416
						2008	3	2	61	17.6	10.7	14.15	51	30.4846	16.8275	12.8122	2.40084	2.84671
						2008	3	3	62	17.6	9	13.3	52.5	29.0994	20.0204	13.6538	2.49047	3.22124
						2008	3	4	63	14.6	8.4	11.5	51	33.6098	16.6704	13.39	2.301	2.52381
						2008	3	5	64	18.4	5.9	12.15	52	27.4675	27.4675	15.538	2.72935	4.10049
						2008	3	6	65	18.5	7.7	13.1	48	27.1853	23.4881	14.2944	2.59056	3.80216
						2008	3	7	66	20.6	11.7	16.15	44	30.8416	21.9592	14.7215	2.9313	4.19655
						2008	3	8	67	22.5	13.4	17.95	43.5	30.0193	21.8541	14.4891	3.03799	4.41908
						2008	3	9	68	22.6	14.5	18.55	46	31.5288	20.4307	14.3572	3.06086	4.08064
						2008	3	10	69	21.3	15.6	18.45	45	19.9269	9.08666	7.61197	1.61835	2.04756
						2008	3	11	70	21.2	13.8	17.5	55	15.3532	9.08912	6.68245	1.3835	1.86605
						2008	3	12	71	19.5	8.6	14.05	69	29.3907	25.6287	15.5254	2.90015	4.15589
						2008	3	13	72	16.8	7.9	12.35	58.5	29.0522	20.6851	13.8673	2.45216	3.1881
						2008	3	14	73	17.2	9.5	13.35	58	23.0577	14.2036	10.2372	1.87029	2.37851
						2008	3	15	74	10.2	6	8.1	62	14.7099	4.94254	4.82342	0.732695	0.764446
						2008	3	16	75	14	4.8	9.4	64	36.0805	26.5553	17.51	2.79334	3.421
						2008	3	17	76	17	3.8	10.4	61	28.6956	30.3026	16.681	2.75892	4.11156
						2008	3	18	77	17.1	3.8	10.45	57	25.2509	26.8669	14.7341	2.44123	3.68589
						2008	3	19	78	18	9	13.5	77.5	29.309	21.1025	14.0683	2.58258	3.40563
						2008	3	20	79	19.7	9.8	14.75	76	31.1887	24.7014	15.7012	2.99746	4.11777
						2008	3	21	80	18.4	8.3	13.35	78	29.1985	23.5924	14.8471	2.71249	3.74909
						2008	3	22	81	20.4	10.2	15.3	72	21.5946	17.6212	11.0348	2.14221	3.08549
						2008	3	23	82	21.8	12	16.9	68	23.3726	18.3241	11.7069	2.38253	3.35265
						2008	3	24	83	27.2	12.1	19.65	79.5	22.092	26.6871	13.7355	3.01691	5.05904
						2008	3	25	84	28.8	17.5	23.15	76	30.7808	27.8259	16.5554	3.97614	5.62756
						2008	3	26	85	24.1	14	19.05	82.5	31.817	25.7081	16.1786	3.4966	4.8212
						2008	3	27	86	17.6	8.2	12.9	84.5	37.7687	28.4021	18.5275	3.33597	4.37053
						2008	3	28	87	20.5	8.2	14.35	79	29.0106	28.5464	16.2791	3.06957	4.64348
						2008	3	29	88	18.2	8.5	13.35	80.5	27.236	21.1351	13.5722	2.47956	3.39038
						2008	3	30	89	21	11.6	16.3	77.5	22.6356	17.022	11.1039	2.22075	3.0854
						2008	3	31	90	21	10	15.5	82	15.3385	13.4979	8.13953	1.58969	2.45573
						2008	4	1	91	16.2	8.8	12.5	86	23.9822	14.1975	10.4382	1.85497	2.29505
						2008	4	2	92	14.8	6	10.4	75.5	33.504	23.5868	15.9022	2.63012	3.25914
						2008	4	3	93	16.8	5	10.9	74.5	28.4761	26.8815	15.651	2.63446	3.77972
						2008	4	4	94	19.8	7	13.4	77	32.037	32.8059	18.3391	3.35583	5.10414
						2008	4	5	95	16.6	8.8	12.7	80	36.4021	22.7149	16.2665	2.90979	3.52552
						2008	4	6	96	18	8	13	72.5	28.1773	22.5419	14.2567	2.57537	3.54523
						2008	4	7	97	21.2	12	16.6	72.5	17.5226	12.8966	8.5038	1.71569	2.44055
						2008	4	8	98	19.7	10.2	14.95	63	30.7942	23.4036	15.1862	2.91696	3.94491
						2008	4	9	99	18	7.4	12.7	63.5	31.2987	26.5413	16.3042	2.91653	4.06936
						2008	4	10	100	19.7	9.6	14.65	61.5	33.2992	26.9057	16.9322	3.22253	4.44129
						2008	4	11	101	18.5	9.7	14.1	50.5	26.9673	18.985	12.7997	2.39473	3.16559
						2008	4	12	102	24.2	13.4	18.8	50	34.1847	29.5356	17.9748	3.85845	5.45308
						2008	4	13	103	25	13.9	19.45	55.5	30.4207	27.0136	16.2163	3.54278	5.09376
						2008	4	14	104	30.2	13.8	22	68	28.1287	36.9049	18.226	4.25444	7.1877
						2008	4	15	105	33	20.4	26.7	67	28.5083	28.7364	16.1911	4.22576	6.11871
						2008	4	16	106	32.2	21.4	26.8	80	33.5397	28.9783	17.6356	4.61311	6.17501
						2008	4	17	107	24.5	13.6	19.05	68.5	29.0815	25.3591	15.3621	3.32014	4.76067
						2008	4	18	108	22.8	9.5	16.15	67.5	34.8733	37.1052	20.3488	4.05179	6.29955
						2008	4	19	109	23.7	12.2	17.95	65.5	31.4843	28.9656	17.083	3.58185	5.24457
						2008	4	20	110	24.4	11.2	17.8	64.5	34.5946	36.5319	20.1102	4.19888	6.49743
						2008	4	21	111	26.8	13	19.9	71.5	32.8409	36.2564	19.5198	4.31603	6.77819
						2008	4	22	112	28.2	12.4	20.3	68.5	28.5788	36.1236	18.1758	4.06149	6.81242
						2008	4	23	113	32.4	13	22.7	67.5	24.3118	37.732	17.1332	4.06969	7.43308
						2008	4	24	114	35	14	24.5	81	22.2366	37.3576	16.3042	4.0449	7.58492
						2008	4	25	115	35.4	21	28.2	73.5	27.6601	31.8645	16.7941	4.53087	6.87107
						2008	4	26	116	31	21.6	26.3	60.5	29.4468	22.144	14.4451	3.73619	4.78401
						2008	4	27	117	34.6	21	27.8	55.5	28.7814	31.3141	16.9825	4.54186	6.72609
						2008	4	28	118	25	14.5	19.75	55	37.4558	31.4629	19.4193	4.27673	5.91158
						2008	4	29	119	23.2	10	16.6	57	33.6763	35.5621	19.5763	3.94964	6.13158
						2008	4	30	120	21.2	10.4	15.8	58	37.1708	32.1156	19.5449	3.8516	5.43957
						2008	5	1	121	20.4	9	14.7	52.5	31.0408	28.3092	16.7689	3.19637	4.66428
						2008	5	2	122	24.5	10.5	17.5	68.5	31.6404	35.4372	18.942	3.92165	6.26416
						2008	5	3	123	25	12.8	18.9	62	35.2428	34.397	19.6956	4.2394	6.30611
						2008	5	4	124	25.2	11.5	18.35	55.5	36.5769	40.0883	21.6614	4.59265	7.19434
						2008	5	5	125	26	12.8	19.4	52	33.1901	35.0487	19.2937	4.20946	6.4928
						2008	5	6	126	24.4	12	18.2	46.5	38.034	37.7298	21.4291	4.52453	7.10531
						2008	5	7	127	23.5	12.2	17.85	50.5	36.7712	33.2412	19.7773	4.13518	5.95144
						2008	5	8	128	21	12	16.5	66.5	34.0019	24.4814	16.3209	3.28327	4.31469
						2008	5	9	129	21.7	10.8	16.25	58	23.446	20.4449	12.3851	2.47335	3.63262
						2008	5	10	130	17.6	8.5	13.05	55.5	32.2184	23.455	15.5505	2.81364	3.68422
						2008	5	11	131	19.8	10.2	15	49	38.9695	29.9286	19.3188	3.7164	5.03378
						2008	5	12	132	22	10	16	51.5	28.7893	27.6377	15.9567	3.1632	4.75644
						2008	5	13	133	24.3	12.4	18.35	57	36.0029	34.2747	19.8715	4.21315	6.20272
						2008	5	14	134	26.4	13	19.7	74.5	31.526	33.7959	18.4647	4.06107	6.31571
						2008	5	15	135	26.7	15.6	21.15	80.5	36.1467	32.0982	19.2686	4.40175	6.20069
						2008	5	16	136	21.4	15.5	18.45	64	33.2901	15.7129	12.9378	2.75066	3.04406
						2008	5	17	137	23.8	13.2	18.5	60	37.9056	32.144	19.7459	4.20389	5.86065
						2008	5	18	138	27	13.4	20.2	69.5	37.6798	40.9956	22.233	4.95506	7.66483
						2008	5	19	139	25.4	15.3	20.35	54	30.2854	24.4706	15.3998	3.4457	4.73997
						2008	5	20	140	29.5	11.2	20.35	43.5	31.9413	46.7621	21.8624	4.89171	9.52759
						2008	5	21	141	31.2	19	25.1	43	30.8824	30.1412	17.2588	4.34246	6.87956
						2008	5	22	142	35.2	22	28.6	48.5	36.136	38.1596	21.0062	5.71654	8.36009
						2008	5	23	143	35.3	24.2	29.75	47.5	35.911	31.889	19.143	5.3386	7.2528
						2008	5	24	144	33	17.8	25.4	56.5	32.8425	39.9365	20.487	5.19075	8.19101
						2008	5	25	145	29	15.6	22.3	48.5	35.1719	37.7043	20.6	4.84485	7.53332
						2008	5	26	146	27	14.5	20.75	43.5	38.4145	38.4145	21.7305	4.91318	7.96472
						2008	5	27	147	27.3	15.6	21.45	46.5	35.2076	32.9543	19.2686	4.43565	6.71272
						2008	5	28	148	30.4	16.2	23.3	47	36.1529	41.0697	21.7975	5.25433	8.48832
						2008	5	29	149	31.2	19.1	25.15	42.5	39.8568	38.5814	22.1827	5.58787	8.74393
						2008	5	30	150	32.6	18.8	25.7	44.5	36.497	40.2927	21.6928	5.53444	8.94824
						2008	5	31	151	31.5	19.4	25.45	48.5	38.0513	36.8336	21.1778	5.372	7.75447
						2008	6	1	152	32.4	17	24.7	57.5	34.329	42.2933	21.5547	5.37277	8.56028
						2008	6	2	153	34.5	19	26.75	60.5	34.4973	42.7766	21.7305	5.67788	8.91153
						2008	6	3	154	32	18	25	53.5	35.5639	39.8316	21.2909	5.34448	8.12231
						2008	6	4	155	30.5	18.4	24.45	43.5	33.3118	32.2458	18.54	4.59415	7.20948
						2008	6	5	156	31.4	17	24.2	47.5	35.9147	41.3738	21.8059	5.37145	8.61506
						2008	6	6	157	34	20.2	27.1	47.5	34.6584	38.2629	20.6	5.42478	8.33995
						2008	6	7	158	29.4	17.8	23.6	41	38.7705	35.979	21.1276	5.13001	8.14305
						2008	6	8	159	27.5	17.4	22.45	43	42.3897	34.2509	21.5547	5.08833	7.42873
						2008	6	9	160	30	16.8	23.4	40.5	37.7062	39.8177	21.9189	5.29645	8.99103
						2008	6	10	161	32.9	18.2	25.55	34.5	34.0414	40.0327	20.8827	5.30937	10.0495
						2008	6	11	162	28.6	18.7	23.65	33.5	40.4953	32.0723	20.3865	4.95605	8.00772
						2008	6	12	163	28.2	17.2	22.7	42	35.3164	31.0785	18.741	4.4516	6.89871
						2008	6	13	164	29	16.4	22.7	37.5	38.4829	38.7908	21.8561	5.19154	8.99335
						2008	6	14	165	31.6	16.2	23.9	39	34.1289	42.0469	21.4291	5.24092	9.72744
						2008	6	15	166	33	21	27	40	33.0877	31.7642	18.3391	4.81862	7.71046
						2008	6	16	167	32.4	19.2	25.8	39	37.2956	39.3842	21.6803	5.54395	9.40776
						2008	6	17	168	33	17.8	25.4	39	35.3998	43.0462	22.0822	5.59493	10.1795
						2008	6	18	169	33.4	18.7	26.05	40.5	33.8264	39.7798	20.7508	5.33669	9.35463
						2008	6	19	170	35.2	21	28.1	40	37.8022	42.9433	22.7919	6.13567	10.402
						2008	6	20	171	36.8	21.5	29.15	40.5	33.4776	40.9766	20.9517	5.76931	10.011
						2008	6	21	172	37.8	25	31.4	40	39.1905	40.1311	22.4339	6.47349	10.1227
						2008	6	22	173	36	24.5	30.25	39	38.059	35.0143	20.6503	5.81952	8.89773
						2008	6	23	174	34.4	23	28.7	41.5	40.2717	36.7278	21.7557	5.93326	8.86266
						2008	6	24	175	34.5	21	27.75	39	37.0926	40.06	21.8059	5.82546	9.81461
						2008	6	25	176	36.4	22.6	29.5	35.5	35.5883	39.2894	21.1527	5.86807	10.2652
						2008	6	26	177	37.5	23.8	30.65	36	35.124	38.4959	20.801	5.9108	10.137
						2008	6	27	178	39.4	25	32.2	34	33.6804	38.7998	20.4493	5.99676	10.6241
						2008	6	28	179	40	15	27.5	36	24.4625	48.9251	19.57	5.19946	12.2796
						2008	6	29	180	38.4	22.8	30.6	33	29.6161	36.9609	18.7159	5.3128	10.0965
						2008	6	30	181	37.2	20	28.6	32.5	30.9309	42.5609	20.5247	5.5855	11.3496
						2008	7	1	182	35.4	21.4	28.4	32.5	35.7528	40.0431	21.4039	5.79968	10.6838
						2008	7	2	183	35.6	21.5	28.55	34.5	33.4514	37.7332	20.0976	5.46339	9.88517
						2008	7	3	184	36.4	22.4	29.4	36.5	35.4171	39.6671	21.203	5.86958	10.2246
						2008	7	4	185	35	21.2	28.1	31.5	34.6584	38.2629	20.6	5.5456	10.3112
						2008	7	5	186	38	21	29.5	32.5	32.4451	44.1254	21.4039	5.93776	11.8719
						2008	7	6	187	34	20.2	27.1	33	34.7852	38.4029	20.6754	5.44463	10.0427
						2008	7	7	188	35.6	20.6	28.1	29.5	30.6891	36.8269	19.0174	5.11954	10.169
						2008	7	8	189	35	21	28	33.5	34.368	38.4921	20.5749	5.52677	10.1229
						2008	7	9	190	36.4	20.4	28.4	37.5	32.8941	42.1045	21.0522	5.70438	10.5661
						2008	7	10	191	36.5	23.6	30.05	42.5	37.1804	38.3701	21.3663	5.99623	9.2628
						2008	7	11	192	39	23.2	31.1	50	32.1438	40.6297	20.443	5.86303	8.93407
						2008	7	12	193	39.8	22.5	31.15	39	30.3695	42.0313	20.2106	5.80231	10.6828
						2008	7	13	194	37.6	22.1	29.85	38	33.0017	40.9221	20.7885	5.80969	10.3956
						2008	7	14	195	39.2	20.5	29.85	40.5	28.2483	42.2595	19.5449	5.46216	10.3921
						2008	7	15	196	36.2	23	29.6	40	32.866	34.7065	19.1053	5.31129	8.652
						2008	7	16	197	35	21	28	36	32.7314	36.6592	19.5952	5.26359	9.38631
						2008	7	17	198	39	21.5	30.25	33.5	28.5627	39.9878	19.1178	5.38766	10.7756
						2008	7	18	199	37	21	29	33.5	30.5782	39.1401	19.57	5.37162	10.4097
						2008	7	19	200	36.4	20.5	28.45	35	31.1566	39.6311	19.8778	5.39197	10.2833
						2008	7	20	201	37	23.6	30.3	34.5	30.1821	32.3552	17.6775	4.98694	8.72373
						2008	7	21	202	39.2	22.6	30.9	36	29.9884	39.8246	19.5491	5.58372	10.4967
						2008	7	22	203	37.2	22.4	29.8	33	32.3243	38.2719	19.8966	5.55462	10.3441
						2008	7	23	204	38	22.6	30.3	36	29.6278	36.5014	18.6028	5.24798	9.60236
						2008	7	24	205	40	21.8	30.9	41	28.7074	41.7979	19.5952	5.59688	10.3367
						2008	7	25	206	39.8	22.2	31	34	27.733	39.048	18.6154	5.32795	10.5587
						2008	7	26	207	38.2	22	30.1	34	29.2088	37.8546	18.8101	5.28439	10.1534
						2008	7	27	208	33.8	20.6	27.2	38.5	33.4062	35.2769	19.4193	5.12524	8.69291
						2008	7	28	209	33.2	18	25.6	32	30.5067	37.0961	19.0299	4.84389	9.62925
						2008	7	29	210	35	21.6	28.3	28.5	33.0273	35.4052	19.3439	5.23015	9.93023
						2008	7	30	211	35	22	28.5	34.5	31.1146	32.3592	17.9497	4.87422	8.54604
						2008	7	31	212	39	23	31	27.5	29.0473	37.1806	18.5903	5.32076	10.8412
						2008	8	1	213	37.4	22	29.7	33	28.8476	35.5402	18.113	5.04604	9.63315
						2008	8	2	214	38.2	22.6	30.4	36.5	31.1069	38.8214	19.658	5.55717	10.1301
						2008	8	3	215	38.2	22.8	30.5	40.5	28.8676	35.5648	18.1255	5.13459	8.88669
						2008	8	4	216	37	23.8	30.4	63.5	32.9092	34.7521	19.1304	5.40803	7.64758
						2008	8	5	217	37.2	22.4	29.8	43	28.7633	34.0557	17.7047	4.9427	8.19879
						2008	8	6	218	37.8	22.6	30.2	48	28.7045	34.9046	17.9057	5.04081	7.8814
						2008	8	7	219	35	22	28.5	38	31.7025	32.9706	18.2888	4.96632	8.34167
						2008	8	8	220	36.4	21.6	29	40	27.9266	33.0651	17.1897	4.71827	8.20894
						2008	8	9	221	38	21.4	29.7	56	25.9227	34.4253	16.8987	4.70778	7.52118
						2008	8	10	222	36.6	22	29.3	49	28.6069	33.4129	17.4891	4.83121	7.38328
						2008	8	11	223	35.4	21.6	28.5	38	29.914	33.0251	17.7801	4.82818	8.35462
						2008	8	12	224	37	22	29.5	29	27.9526	33.5432	17.3216	4.80527	9.51966
						2008	8	13	225	34.4	20.4	27.4	30	29.773	33.3458	17.8241	4.72512	9.1271
						2008	8	14	226	36	21.4	28.7	33	28.922	33.7808	17.6817	4.8222	9.07664
						2008	8	15	227	37.6	22.4	30	41.5	28.4528	34.5986	17.7487	4.97579	8.50301
						2008	8	16	228	37.4	22.8	30.1	47	28.2611	33.0089	17.2777	4.85387	7.57304
						2008	8	17	229	34.6	22	28.3	52.5	31.671	31.9244	17.9874	4.86336	6.89164
						2008	8	18	230	36.2	20.8	28.5	48.5	25.4967	31.4119	16.009	4.34723	6.95016
						2008	8	19	231	39	23.8	31.4	51	25.5229	31.0359	15.9211	4.59415	6.94929
						2008	8	20	232	40	22.4	31.2	54	22.7989	32.1009	15.3035	4.39799	7.15788
						2008	8	21	233	41.4	23.4	32.4	53.5	24.0122	34.5775	16.3	4.79909	7.7698
						2008	8	22	234	42	21.8	31.9	50.5	25.6771	41.4942	18.4647	5.38228	9.18985
						2008	8	23	235	40	24	32	50.5	21.4126	27.4081	13.7041	4.00264	6.22598
						2008	8	24	236	38.4	25.4	31.9	47.5	16.646	17.3118	9.60288	2.79915	4.23704
						2008	8	25	237	35.2	23.8	29.5	36	14.0362	12.801	7.58266	2.10354	3.67222
						2008	8	26	238	36	20.6	28.3	42	21.4556	26.4333	13.4717	3.64242	6.43957
						2008	8	27	239	38	25	31.5	39	20.5181	21.3388	11.8366	3.4225	5.6932
						2008	8	28	240	41	22.5	31.75	40.5	18.4349	27.2836	12.6866	3.68687	7.02344
						2008	8	29	241	40.2	23.8	32	47	17.9512	23.552	11.6315	3.39729	5.64404
						2008	8	30	242	40	27.8	33.9	47.5	23.7949	23.2238	13.2979	4.0322	5.63443
						2008	8	31	243	36	21.2	28.6	48.5	21.9168	25.9495	13.4905	3.67125	5.82398
						2008	9	1	244	35.2	21	28.1	58.5	23.2501	26.4121	14.0181	3.77372	5.76059
						2008	9	2	245	36.2	21.2	28.7	56	23.6081	28.3297	14.6294	3.98976	6.19322
						2008	9	3	246	35.4	19.6	27.5	51.5	22.3785	28.2864	14.2325	3.78134	6.09316
						2008	9	4	247	36.4	19.8	28.1	54	22.7755	30.2458	14.8471	3.99689	6.53544
						2008	9	5	248	36.6	20	28.3	61	22.6888	30.1307	14.7906	3.99902	6.52823
						2008	9	6	249	39	21	30	59	20.114	28.9641	13.6538	3.8278	6.41785
						2008	9	7	250	38.4	20.8	29.6	61.5	20.65	29.0752	13.8611	3.85339	6.41193
						2008	9	8	251	36.8	24.2	30.5	57	25.0139	25.214	14.2065	4.02441	5.67384
						2008	9	9	252	36	20.2	28.1	56	20.4219	25.8133	12.9881	3.49643	5.63957
						2008	9	10	253	35.2	21.2	28.2	58.5	24.2548	27.1654	14.5205	3.91749	5.92015
						2008	9	11	254	33.4	20.8	27.1	58.5	23.0013	23.1853	13.0634	3.44011	5.04365
						2008	9	12	255	33	19.4	26.2	59	20.3087	22.0959	11.9832	3.09238	4.76791
						2008	9	13	256	33.8	19	26.4	60.5	21.9576	25.9978	13.5156	3.5037	5.55244
						2008	9	14	257	34.2	20.4	27.3	48	23.4156	25.8508	13.9176	3.68136	5.74985
						2008	9	15	258	32.8	16.6	24.7	51.5	19.1344	24.7982	12.3223	3.0715	5.18597
						2008	9	16	259	35	22.4	28.7	55	22.8612	23.0441	12.9839	3.541	5.11712
						2008	9	17	260	35.2	20.2	27.7	52	19.9459	23.9351	12.36	3.29837	5.23366
						2008	9	18	261	34.2	20	27.1	54.5	22.0001	24.9921	13.2644	3.49303	5.40419
						2008	9	19	262	31.5	19	25.25	47	21.4277	21.4277	12.1214	3.0605	4.76955
						2008	9	20	263	28.6	20.6	24.6	46	27.8672	17.835	12.6112	3.13611	4.05633
						2008	9	21	264	28.5	15.5	22	52.5	20.5979	21.4219	11.8827	2.77374	4.33381
						2008	9	22	265	30	16.5	23.25	48.5	19.9885	21.5876	11.7508	2.82911	4.55721
						2008	9	23	266	27	16.2	21.6	48.5	18.3386	15.8445	9.64266	2.22824	3.35144
						2008	9	24	267	23	15	19	53.5	27.5202	17.6129	12.4542	2.68802	3.41325
						2008	9	25	268	22.5	14.5	18.5	54.5	14.1001	9.02408	6.38099	1.35851	1.90266
						2008	9	26	269	27.5	15	21.25	48	21.1798	21.1798	11.9811	2.74401	4.3495
						2008	9	27	270	27.3	17.8	22.55	48	16.8362	12.7955	8.30282	1.96489	2.85034
						2008	9	28	271	23.6	16.2	19.9	49	5.02155	2.97276	2.18561	0.483262	0.907688
						2008	9	29	272	26.5	15	20.75	50.5	19.2378	17.6988	10.4382	2.36003	3.5606
						2008	9	30	273	23.4	14	18.7	44	13.8272	10.3981	6.78294	1.45204	2.3323
						2008	10	1	274	23	15.2	19.1	45	23.5279	14.6814	10.5136	2.27533	3.12013
						2008	10	2	275	29.4	13.2	21.3	57	21.475	27.8317	13.8297	3.17144	5.44277
						2008	10	3	276	26.5	12.5	19.5	72	21.1216	23.6561	12.6447	2.76622	4.51117
						2008	10	4	277	27	14	20.5	66	22.6773	23.5844	13.0823	2.93867	4.59608
						2008	10	5	278	29.2	14.2	21.7	56	17.3919	20.8702	10.7773	2.49676	4.20854
						2008	10	6	279	27.4	16.2	21.8	58	19.7206	17.6696	10.5596	2.45251	3.62868
						2008	10	7	280	27	15	21	57.5	19.5353	18.7539	10.8276	2.46395	3.76928
						2008	10	8	281	25.4	14.8	20.1	57	19.3386	16.3992	10.0739	2.23927	3.28222
						2008	10	9	282	26	14	20	53.5	24.3398	23.3663	13.4905	2.99081	4.50939
						2008	10	10	283	26	14	20	57.5	18.5004	17.7604	10.254	2.27327	3.51635
						2008	10	11	284	27.4	15	21.2	55	17.2335	17.0956	9.70965	2.22094	3.48309
						2008	10	12	285	28.4	16.8	22.6	53	14.0145	13.0055	7.63709	1.80958	2.81274
						2008	10	13	286	27	16.2	21.6	49	22.2881	19.257	11.7194	2.70813	3.96124
						2008	10	14	287	32.4	16.8	24.6	51	17.0806	21.3166	10.7941	2.68423	4.50755
						2008	10	15	288	32	16	24	57.5	10.932	13.993	6.99648	1.71524	3.06813
						2008	10	16	289	31.6	15.8	23.7	74	6.5703	8.30485	4.17863	1.01707	1.97341
						2008	10	17	290	20.8	10.8	15.8	63.5	10.5013	8.40107	5.3133	1.04706	1.66835
						2008	10	18	291	25.2	13.2	19.2	62.5	20.0566	19.2543	11.1165	2.41233	3.71466
						2008	10	19	292	28	13.2	20.6	64	19.8319	23.481	12.2072	2.74926	4.58698
						2008	10	20	293	27	13	20	61	16.4776	18.4549	9.86457	2.18695	3.63939
						2008	10	21	294	28	14	21	72	15.3796	17.2251	9.20721	2.09521	3.49282
						2008	10	22	295	27.6	14.2	20.9	59	14.6478	15.7024	8.57916	1.94726	3.21107
						2008	10	23	296	24	12.4	18.2	67	15.993	14.8415	8.71524	1.84014	2.87734
						2008	10	24	297	24	10.8	17.4	73	12.4031	13.0976	7.21001	1.48849	2.52846
						2008	10	25	298	23.8	11.2	17.5	73.5	15.2826	15.4049	8.67965	1.79699	2.92029
						2008	10	26	299	25	11	18	60	14.4144	16.1441	8.62941	1.81189	3.08323
						2008	10	27	300	20.8	12	16.4	67	9.55367	6.72578	4.53452	0.909548	1.42737
						2008	10	28	301	19	10	14.5	67	14.0788	10.1367	6.75782	1.2802	1.86302
						2008	10	29	302	22	11	16.5	65	10.3203	9.08191	5.4766	1.10172	1.8141
						2008	10	30	303	18.8	11.4	15.1	60.5	13.0349	7.71664	5.67338	1.09473	1.52508
						2008	10	31	304	22.6	12.4	17.5	65.5	17.551	14.3216	8.96855	1.8568	2.73948
						2008	11	1	305	24	12.8	18.4	57.5	14.6145	13.0946	7.8255	1.66146	2.5932
						2008	11	2	306	22.8	12.5	17.65	60.5	16.585	13.666	8.51636	1.77067	2.6404
						2008	11	3	307	21.4	12	16.7	64.5	18.0436	13.5688	8.85132	1.791	2.55728
						2008	11	4	308	22.4	11	16.7	60	17.6712	16.1161	9.54636	1.93163	2.97328
						2008	11	5	309	22.6	10	16.3	84.5	13.4911	13.5991	7.66221	1.53242	2.53281
						2008	11	6	310	23.6	11	17.3	74	14.737	14.8549	8.36981	1.72302	2.81349
						2008	11	7	311	23.5	11.2	17.35	69	15.1694	14.9267	8.51217	1.75482	2.82919
						2008	11	8	312	24.2	10	17.1	72	13.2709	15.0757	8.00136	1.63779	2.83475
						2008	11	9	313	22.2	9.8	16	71.5	13.1313	13.0263	7.39843	1.46664	2.4186
						2008	11	10	314	20.8	9.8	15.3	75.5	11.2198	9.87345	5.95391	1.15584	1.87269
						2008	11	11	315	20.6	10	15.3	89.5	13.7685	11.6757	7.17233	1.39238	2.15481
						2008	11	12	316	19.2	9.8	14.5	83.5	14.2796	10.7382	7.00485	1.327	1.95467
						2008	11	13	317	19.7	9.5	14.6	72	12.3808	10.1027	6.32656	1.20221	1.86433
						2008	11	14	318	15.2	7	11.1	72	8.05104	5.28148	3.68875	0.625237	0.971849
						2008	11	15	319	18.4	7	12.7	68.5	9.47888	8.64474	5.1207	0.916004	1.52573
						2008	11	16	320	20.6	6.8	13.7	69	12.7785	14.1075	7.59522	1.4032	2.39689
						2008	11	17	321	20.2	8	14.1	62	14.0552	13.7178	7.85481	1.46958	2.37444
						2008	11	18	322	19.8	8.8	14.3	65	12.8925	11.3454	6.84156	1.28804	2.03274
						2008	11	19	323	17.4	8.4	12.9	66.5	13.3984	9.64685	6.43123	1.15798	1.68228
						2008	11	20	324	15.4	7.6	11.5	65.5	6.36217	3.97	2.84297	0.488549	0.815241
						2008	11	21	325	14.4	7.5	10.95	69	9.23005	5.09499	3.87926	0.654115	0.939863
						2008	11	22	326	15	6.8	10.9	68.5	6.78535	4.45119	3.10885	0.523298	0.853386
						2008	11	23	327	16.8	6	11.4	67.5	11.1003	9.59064	5.83668	0.999578	1.56361
						2008	11	24	328	14.8	3.9	9.35	89	11.3187	9.86994	5.97904	0.95207	1.42365
						2008	11	25	329	17.2	5	11.1	68.5	7.61196	7.42928	4.25399	0.721045	1.25501
						2008	11	26	330	18	9.6	13.8	70	8.8801	5.96743	4.11791	0.76319	1.19686
						2008	11	27	331	19.6	7	13.3	76.5	10.675	10.7604	6.06278	1.10586	1.87216
						2008	11	28	332	19.4	7	13.2	76.5	10.129	10.048	5.70688	1.0376	1.7613
						2008	11	29	333	13.6	6.8	10.2	75	7.70708	4.19265	3.21562	0.528068	0.788323
						2008	11	30	334	13	5.4	9.2	80.5	11.277	6.8564	4.97416	0.787682	1.05434
						2008	12	1	335	15.2	6.3	10.75	75	10.6007	7.5477	5.05999	0.847274	1.24729
						2008	12	2	336	19.2	6	12.6	75.5	9.86771	10.4203	5.73619	1.02274	1.77048
						2008	12	3	337	18.4	5.6	12	75.5	9.53065	9.75938	5.45566	0.953524	1.63258
						2008	12	4	338	16.5	6.4	11.45	70	11.7914	9.52745	5.99578	1.02858	1.55902
						2008	12	5	339	18	7	12.5	74.5	10.9673	9.65126	5.81993	1.03426	1.65445
						2008	12	6	340	18.2	7.4	12.8	83.5	10.2881	8.88889	5.4096	0.970856	1.56706
						2008	12	7	341	19.6	9.4	14.5	86	9.04181	7.37811	4.62035	0.875278	1.44268
						2008	12	8	342	17	8.7	12.85	91.5	9.79635	6.50477	4.51568	0.811749	1.22935
						2008	12	9	343	14	5	9.5	92.5	5.74404	4.13571	2.75714	0.441458	0.748356
						2008	12	10	344	9	4.8	6.9	93	10.4195	3.50097	3.41659	0.494946	0.546076
						2008	12	11	345	12	3.2	7.6	71	12.8882	9.07328	6.11721	0.911286	1.16375
						2008	12	12	346	11.8	2.2	7	67.5	11.9468	9.17512	5.92251	0.861441	1.11115
						2008	12	13	347	13.4	1.5	7.45	69	11.4472	10.8977	6.31818	0.935668	1.33609
						2008	12	14	348	12.2	2.7	7.45	69	10.2223	7.76893	5.04115	0.74655	1.01422
						2008	12	15	349	12.7	0.5	6.6	80	10.5189	10.2664	5.87855	0.841255	1.17043
						2008	12	16	350	17	3.5	10.25	77.5	9.964	10.7611	5.85761	0.963655	1.61721
						2008	12	17	351	15	3.5	9.25	73.5	10.3713	9.5416	5.62733	0.892766	1.37541
						2008	12	18	352	17.5	3.2	10.35	77.5	10.1795	11.6454	6.15908	1.01686	1.73846
						2008	12	19	353	14.2	0	7.1	85	9.40281	10.6816	5.6692	0.827921	1.27196
						2008	12	20	354	15.2	1	8.1	91	8.9028	10.1136	5.36773	0.815378	1.32655
						2008	12	21	355	11	-1	5	71	4.79696	4.60508	2.65874	0.355533	0.518869
						2008	12	22	356	10.5	-0.5	5	73	4.26069	3.74941	2.26098	0.302343	0.452554
						2008	12	23	357	7.2	-2	2.6	72.5	3.18358	2.34311	1.545	0.184853	0.203016
						2008	12	24	358	7.6	4.6	6.1	84	7.97731	1.91455	2.21074	0.309887	0.358892
						2008	12	25	359	11	-0.1	5.45	75	9.26052	8.22334	4.93647	0.673144	0.852048
						2008	12	26	360	10.4	2	6.2	81	8.42413	5.66101	3.90647	0.549875	0.70271
						2008	12	27	361	8	-0.1	3.95	77	8.51435	5.5173	3.87716	0.494585	0.491564
						2008	12	28	362	10.8	0	5.4	78	6.45791	5.57963	3.39566	0.46204	0.629361
						2008	12	29	363	9	-2.5	3.25	77	1.7054	1.56897	0.925327	0.114239	0.201995
						2008	12	30	364	6	0	3	83	10.021	4.81007	3.92741	0.479112	0.356504
						2008	12	31	365	8.2	-1	3.6	81	3.753	2.76221	1.82134	0.228599	0.291132
																0
																	1011.35	1631.38
																	ETo-HS	ETo-TURC (Ousman Couly (2016)

## Sheet: 2009
	KİLİS					year	month	day	DOY	Tmax	Tmin	Tmean	RHmean	Ra	Rs=0.16(Tmax-Tmin)^0.5*Ra	Rs=from meteorological station	ETo-HS	ETo-TURC (Ousman Couly (2016)
	DOY	246					#	#		°C	°C	°C	%	MJ m-2 day-1*(0.408 mm day-1)
	φ (-)	36.71	0.64071			2009	1	1	1	4.5	-3.8	0.35	57.5	4.41449	2.93122	2.03488	0.216613	0.035492
	tan(φ)		0.745649			2009	1	2	2	5.5	-4.2	0.65	64.5	8.29305	6.43541	4.13257	0.447182	0.109768
	sin(φ)		0.597765			2009	1	3	3	6	0	3	83.5	2.57469	1.23585	1.00907	0.123098	0.171836
	cos(φ)		0.801671			2009	1	4	4	6.2	1	3.6	64	7.05759	2.93596	2.575	0.323191	0.301557
	dr	0.984766		(1+0.033*cos(2*3.14/365*DOY))		2009	1	5	5	6	1	3.5	94	3.93221	1.57289	1.40683	0.175748	0.214823
	δ	0.120494		(0.409*sin(2*3.14/365*DOY-1.39))		2009	1	6	6	9.8	2	5.9	73	4.34296	2.71	1.94067	0.269755	0.420058
	tan(δ)	0.121081				2009	1	7	7	7.7	4	5.85	78.5	3.3467	0.990624	1.03	0.142869	0.267948
	sin(δ)	0.120203				2009	1	8	8	11.8	2	6.9	65.5	8.93609	7.0059	4.4759	0.648404	0.888407
	cos(δ)	0.992749				2009	1	9	9	13.8	5	9.4	69.5	9.25815	6.51774	4.39426	0.701007	1.02799
	X	0.991849				2009	1	10	10	10	-1	4.5	65.5	9.53922	8.39451	5.06208	0.662067	0.750046		-
	ωs (eq. 25)	1.49314		(acos{(-1*tan(-0.35)*tan(0.409*sin(2*3.14/365*DOY-1.39))))		2009	1	11	11	10.6	0.5	5.55	67	7.09789	5.7351	3.60919	0.494271	0.655138
	sin ωs	0.996986				2009	1	12	12	10.2	-2.6	3.8	67	10.6388	10.8941	6.08999	0.771504	0.813579
	sin φ*sin δ	-0.0718532		(sin(0.35)*sin(0.409*sin(2*3.14/365*DOY-1.39)))		2009	1	13	13	13.8	-3	5.4	81.5	9.1586	12.3092	6.00625	0.817259	1.18158
	cos φ*cos δ	0.795859		(cos(0.35)*cos(0.409*sin(2*3.14/365*DOY-1.39))		2009	1	14	14	13.2	0	6.6	70	9.08262	9.59125	5.27981	0.755572	1.10647
	Gsc	0.082				2009	1	15	15	14.2	0.6	7.4	72	9.29576	10.1138	5.48497	0.810668	1.2498
						2009	1	16	16	13	4	8.5	65	5.61756	4.04464	2.69643	0.415923	0.687863
	Ra	25.4105				2009	1	17	17	13.2	3	8.1	49.5	9.8325	8.02332	5.0244	0.763224	1.10718
						2009	1	18	18	13.6	1.2	7.4	62	8.53871	8.4704	4.81086	0.711036	1.0815
						2009	1	19	19	12.5	2	7.25	95	4.90204	4.11772	2.54151	0.373394	0.627049
						2009	1	20	20	11.4	4.6	8	100	7.91782	4.30729	3.30354	0.499882	0.689795
						2009	1	21	21	13.8	2	7.9	99	9.26732	8.74835	5.09349	0.767744	1.15909
						2009	1	22	22	14.8	5	9.9	68	8.57664	6.72409	4.29586	0.697908	1.08636
						2009	1	23	23	13	2.8	7.9	71.5	7.57922	6.18465	3.87297	0.583775	0.884917
						2009	1	24	24	10	2.6	6.3	79.5	2.61178	1.54618	1.13677	0.160679	0.333401
						2009	1	25	25	8.5	3	5.75	77.5	3.24709	1.42872	1.21842	0.168289	0.302271
						2009	1	26	26	9.6	2	5.8	78.5	2.99011	1.81799	1.3189	0.182555	0.337815
						2009	1	27	27	11.4	2.4	6.9	73	7.51043	5.40751	3.60501	0.522241	0.732291
						2009	1	28	28	11.2	1.4	6.3	98.5	5.16605	4.05018	2.58757	0.365743	0.562994
						2009	1	29	29	11.4	2	6.7	56	4.67735	3.51737	2.29448	0.329699	0.536705
						2009	1	30	30	9	4.4	6.7	97	5.27094	1.9397	1.80878	0.259909	0.3857
						2009	1	31	31	8.4	3.5	5.95	60.5	3.90121	1.52927	1.38171	0.192464	0.318651
						2009	2	1	32	11.5	3.5	7.5	89.5	8.43787	5.40024	3.81854	0.566613	0.773991
						2009	2	2	33	11	1	6	99	6.85194	5.48155	3.46684	0.483925	0.670623
						2009	2	3	34	14.2	-0.6	6.8	99	9.85985	11.6741	6.06906	0.875637	1.33095
						2009	2	4	35	13	1.5	7.25	99	8.86654	8.15722	4.81086	0.706804	1.03508
						2009	2	5	36	13.6	5	9.3	98.5	8.13374	5.59601	3.81645	0.606592	0.911884
						2009	2	6	37	15	5	10	96.5	9.13592	7.30873	4.62245	0.753676	1.16544
						2009	2	7	38	15	6	10.5	76	10.6245	7.64965	5.09977	0.846457	1.24324
						2009	2	8	39	13.6	7	10.3	73.5	6.32561	3.33992	2.60013	0.428518	0.685286
						2009	2	9	40	11.6	8.6	10.1	69	0.9745	0.23388	0.270062	0.0441911	0.289883
						2009	2	10	41	12.5	6	9.25	76	6.62043	3.44262	2.70061	0.428448	0.654218
						2009	2	11	42	14.6	4.6	9.6	72	10.5262	8.42093	5.32586	0.855872	1.27157
						2009	2	12	43	13.6	6	9.8	71	4.35701	2.64906	1.92183	0.311095	0.580535
						2009	2	13	44	16.4	8	12.2	95	5.63414	3.78614	2.61269	0.459702	0.817043
						2009	2	14	45	16.4	8.2	12.3	99.5	4.33532	2.84397	1.98631	0.350657	0.689129
						2009	2	15	46	13.6	4.6	9.1	100	4.01254	2.88903	1.92602	0.303865	0.582815
						2009	2	16	47	9	3.6	6.3	82	2.52252	1.08973	0.937888	0.132567	0.29155
						2009	2	17	48	10.6	1	5.8	82	11.25	8.63998	5.57708	0.771947	0.927524
						2009	2	18	49	6.2	1.2	3.7	76	2.38742	0.954966	0.854148	0.107706	0.186769
						2009	2	19	50	8.6	4	6.3	59.5	2.08641	0.7678	0.715977	0.101201	0.262032
						2009	2	20	51	6.6	1.5	4.05	76.5	4.2411	1.73037	1.53244	0.196383	0.251783
						2009	2	21	52	7.4	2.6	5	81.5	4.65829	1.78879	1.63293	0.218359	0.300606
						2009	2	22	53	12.5	0	6.25	80.5	15.8765	15.8765	8.98111	1.26682	1.63812
						2009	2	23	54	10.2	3.6	6.9	79	6.41729	3.38833	2.63781	0.382128	0.535075
						2009	2	24	55	10.5	3	6.75	81	6.79394	4.07637	2.97696	0.428639	0.593247
						2009	2	25	56	9.8	5	7.4	83	1.38554	0.532049	0.485692	0.0717843	0.268526
						2009	2	26	57	12.2	5.8	9	92	17.0678	8.7387	6.90855	1.0859	1.25884
						2009	2	27	58	11.8	4	7.9	85.5	4.61	2.87664	2.06	0.310505	0.531148
						2009	2	28	59	10.8	4.2	7.5	87.5	11.2455	5.93764	4.62245	0.6859	0.829523
						2009	3	1	60	11.4	2.4	6.9	95	27.6429	19.9029	13.2686	1.92216	2.14807
						2009	3	2	61	12.4	0	6.2	68.5	20.756	20.5899	11.6943	1.64609	2.05617
						2009	3	3	62	13.2	4.8	9	84	25.7193	17.2834	11.9267	1.87466	2.25216
						2009	3	4	63	13.2	1	7.1	86.5	18.7452	18.2953	10.4759	1.52988	2.03023
						2009	3	5	64	10	4.6	7.3	87	31.8243	13.7481	11.8325	1.74187	1.60725
						2009	3	6	65	14.4	4.8	9.6	42	22.8547	17.5524	11.33	1.82075	2.64782
						2009	3	7	66	16.2	6	11.1	53	27.4081	22.365	14.0055	2.37391	3.22413
						2009	3	8	67	17.2	10	13.6	63.5	29.1405	16.7849	12.5108	2.30399	2.7824
						2009	3	9	68	15.1	9	12.05	60.5	30.5148	14.8912	12.0586	2.1111	2.34504
						2009	3	10	69	15.4	6	10.7	49	25.6571	19.2942	12.5861	2.1038	2.7994
						2009	3	11	70	16	7.6	11.8	62	25.8141	17.3471	11.9706	2.07815	2.65302
						2009	3	12	71	18.2	8	13.1	56	21.1563	17.2635	10.8108	1.95923	2.79696
						2009	3	13	72	18.6	7	12.8	93.5	23.2346	21.5617	12.6615	2.27234	3.3759
						2009	3	14	73	13	5	9	89.5	27.7006	17.7284	12.5359	1.97041	2.30389
						2009	3	15	74	7.9	4	5.95	64.5	35.7249	11.1462	11.2882	1.57237	1.16535
						2009	3	16	75	13	2.8	7.9	49.5	22.3034	18.1996	11.397	1.71788	2.18533
						2009	3	17	76	12.6	2	7.3	35.5	22.4733	19.0574	11.7069	1.72338	2.59057
						2009	3	18	77	13.8	4.6	9.2	58.5	22.5698	16.6113	10.9532	1.73449	2.20398
						2009	3	19	78	14.4	4	9.2	79.5	17.8683	14.8664	9.21977	1.46	1.99834
						2009	3	20	79	14.2	7.2	10.7	88	25.7558	14.4232	10.9029	1.82246	2.1313
						2009	3	21	80	16.2	4	10.1	68.5	24.2519	23.6699	13.5533	2.21778	3.21331
						2009	3	22	81	17.5	5.6	11.55	58	20.7324	19.7372	11.4431	1.96978	2.94359
						2009	3	23	82	11	4.6	7.8	60	29.8531	15.2848	12.0837	1.81429	1.84264
						2009	3	24	83	14.2	5	9.6	79.5	20.9133	15.3922	10.1493	1.631	2.11491
						2009	3	25	84	14.8	3.5	9.15	67.5	19.1738	17.3331	10.3126	1.63002	2.28131
						2009	3	26	85	14.6	6	10.3	56.5	23.0761	15.8764	10.8276	1.78446	2.26745
						2009	3	27	86	13	5	9	48	18.3607	11.7508	8.3091	1.30604	1.65497
						2009	3	28	87	11.6	6	8.8	73	26.2746	11.771	9.94831	1.55203	1.58877
						2009	3	29	88	16.5	6	11.25	56.5	14.4275	12.1191	7.48008	1.27444	1.88778
						2009	3	30	89	21	6.6	13.8	51	21.9295	25.2628	13.3147	2.46766	4.06303
						2009	3	31	90	23	9.2	16.1	66	22.4012	24.7309	13.3147	2.64727	4.30428
						2009	4	1	91	22.4	12	17.2	96.5	20.0106	16.6488	10.3251	2.11949	3.10296
						2009	4	2	92	22.6	10	16.3	71.5	15.9461	16.0737	9.05648	1.81126	2.9323
						2009	4	3	93	23.5	11	17.25	51.5	19.3072	19.3072	10.9218	2.24517	3.54795
						2009	4	4	94	19.8	12	15.9	56.5	27.2665	17.0143	12.1842	2.40821	3.04741
						2009	4	5	95	21.2	9	15.1	61.5	18.1159	17.6811	10.1242	1.95354	3.0747
						2009	4	6	96	22.8	7.6	15.2	62.5	17.8677	21.7272	11.1458	2.15721	3.71611
						2009	4	7	97	17.8	9.8	13.8	75	22.8988	14.6552	10.3628	1.92058	2.48737
						2009	4	8	98	18	7.6	12.8	75.5	18.0144	14.988	9.29514	1.66819	2.4376
						2009	4	9	99	20.4	8.6	14.5	86.5	14.5352	13.7212	7.9888	1.51339	2.4092
						2009	4	10	100	20	7	13.5	82	17.7093	18.4177	10.2163	1.87545	3.01139
						2009	4	11	101	21	9	15	55.5	19.3767	18.6016	10.7397	2.06601	3.2072
						2009	4	12	102	20	11	15.5	74.5	22.1911	15.9776	10.6517	2.08033	2.84639
						2009	4	13	103	24	9.4	16.7	72.5	19.4365	22.7019	11.8827	2.40438	4.04882
						2009	4	14	104	20	11.4	15.7	50	24.5128	16.8648	11.5017	2.25982	3.00498
						2009	4	15	105	17	9	13	63.5	23.5233	15.0549	10.6454	1.92301	2.46765
						2009	4	16	106	14.5	7	10.75	50.5	25.8571	15.5143	11.33	1.89716	2.2783
						2009	4	17	107	18.5	7.2	12.85	69.5	20.7852	18.7899	11.1793	2.00961	2.98653
						2009	4	18	108	18	7	12.5	84	20.8774	18.3721	11.0788	1.96881	2.8833
						2009	4	19	109	22	6.8	14.4	70.5	17.5388	21.3272	10.9406	2.06617	3.55559
						2009	4	20	110	25	11.4	18.2	94.5	16.9665	18.4596	10.0111	2.11375	3.49219
						2009	4	21	111	26.2	11.2	18.7	68	16.277	19.5324	10.0865	2.15924	3.71944
						2009	4	22	112	26.2	14	20.1	72	4.8324	4.71642	2.70061	0.600302	1.20829
						2009	4	23	113	22.4	13.6	18	77.5	11.2209	7.89953	5.32586	1.11826	1.68914
						2009	4	24	114	20	12.5	16.25	34.5	4.38596	2.63158	1.92183	0.383796	0.929652
						2009	4	25	115	20	10.4	15.2	36.5	5.27026	4.04756	2.61269	0.505673	1.14231
						2009	4	26	116	21	9.5	15.25	49.5	3.66082	3.36796	1.98631	0.385023	0.859068
						2009	4	27	117	23.6	8.8	16.2	76.5	3.12903	3.70477	1.92602	0.384068	0.932736
						2009	4	28	118	22	12.2	17.1	66	1.87248	1.46803	0.937888	0.191975	0.587573
						2009	4	29	119	24.6	8.2	16.4	66.5	8.60727	11.2927	5.57708	1.11867	2.16681
						2009	4	30	120	21	10.5	15.75	62	1.64747	1.38388	0.854148	0.168071	0.551584
						2009	5	1	121	23.2	11	17.1	62	1.28115	1.2504	0.715977	0.146552	0.551634
						2009	5	2	122	22	10	16	57.5	2.76486	2.65427	1.53244	0.303787	0.759083
						2009	5	3	123	25	11	18	58.5	2.72762	3.05493	1.63293	0.342861	0.869961
						2009	5	4	124	22	9.2	15.6	62.5	15.6894	16.0659	8.98111	1.75932	2.86935
						2009	5	5	125	19	8	13.5	61	4.97081	4.37431	2.63781	0.484235	0.949233
						2009	5	6	126	18	8	13	62.5	5.88373	4.70698	2.97696	0.537763	0.97828
						2009	5	7	127	21.2	7	14.1	54.5	0.805558	0.915114	0.485692	0.0908698	0.451387
						2009	5	8	128	23.2	9.2	16.2	56.5	11.5399	12.9247	6.90855	1.37763	2.41679
						2009	5	9	129	24.4	9	16.7	73.5	3.28086	4.04202	2.06	0.416826	1.00143
						2009	5	10	130	24.4	11	17.7	81.5	7.89223	8.46047	4.62245	0.962428	1.77035
						2009	5	11	131	24	11	17.5	79.5	23.0003	23.9203	13.2686	2.74706	4.34172
						2009	5	12	132	26.2	10	18.1	88	18.1592	23.5343	11.6943	2.46227	4.34375
						2009	5	13	133	29	12	20.5	76.5	18.079	24.5875	11.9267	2.67908	4.77564
						2009	5	14	134	31	13	22	63	15.4324	22.2227	10.4759	2.44535	4.48142
						2009	5	15	135	31.2	15	23.1	37	18.3737	23.8124	11.8325	2.83835	5.77256
						2009	5	16	136	33	16.6	24.8	57	17.4859	22.9415	11.33	2.83079	4.83524
						2009	5	17	137	35	17	26	84.5	20.6321	29.7102	14.0055	3.59783	6.25145
						2009	5	18	138	36.2	16.2	26.2	58.5	17.4843	27.9749	12.5108	3.22853	5.92687
						2009	5	19	139	37.5	17.5	27.5	70	16.8523	26.9638	12.0586	3.20377	5.82784
						2009	5	20	140	32.4	16	24.2	67	19.4245	25.485	12.5861	3.10034	5.27723
						2009	5	21	141	28	16.2	22.1	57	21.7799	20.5602	11.9706	2.80129	4.18266
						2009	5	22	142	29	13	21	56.5	16.8919	21.6217	10.8108	2.46014	4.28786
						2009	5	23	143	29.6	12	20.8	39.5	18.8629	26.559	12.6615	2.86642	5.93402
						2009	5	24	144	29	12	20.5	53.5	19.0025	25.8434	12.5359	2.81593	5.00047
						2009	5	25	145	30	14	22	39.5	17.6377	22.5763	11.2882	2.63496	5.22859
						2009	5	26	146	28	13.8	20.9	47.5	18.9028	21.4736	11.397	2.58684	4.40449
						2009	5	27	147	26.6	14	20.3	59	20.6127	20.7776	11.7069	2.61597	4.07665
						2009	5	28	148	28.2	15	21.6	63.5	18.8423	19.8975	10.9532	2.53107	4.02262
						2009	5	29	149	30	16	23	61	15.4006	17.2486	9.21977	2.20622	3.62854
						2009	5	30	150	33.5	18.6	26.05	57	17.6535	21.043	10.9029	2.80402	4.5508
						2009	5	31	151	35	16	25.5	51	19.4334	29.5388	13.5533	3.44193	6.17347
						2009	6	1	152	34.5	20.8	27.65	63.5	19.3225	21.1774	11.4431	3.05031	4.67612
						2009	6	2	153	36.5	21.5	29	58	19.5	23.3999	12.0837	3.31675	5.20806
						2009	6	3	154	36.5	22	29.25	50	16.6583	19.3237	10.1493	2.80068	4.38799
						2009	6	4	155	33	20.5	26.75	62	18.2302	18.2302	10.3126	2.69453	4.03606
						2009	6	5	156	28.2	16.8	22.5	34.5	20.0428	18.2791	10.8276	2.5592	4.62756
						2009	6	6	157	31.5	17.2	24.35	44.5	13.733	15.7106	8.3091	2.05409	3.68298
						2009	6	7	158	35	17.2	26.1	60	14.7374	20.986	9.94831	2.56143	4.54277
						2009	6	8	159	35	17	26	70.5	11.0192	15.8676	7.48008	1.92153	3.53021
						2009	6	9	160	36	17	26.5	72.5	19.0912	29.0186	13.3147	3.45941	6.15801
						2009	6	10	161	38.5	19.5	29	56.5	19.0912	29.0186	13.3147	3.65463	6.35606
						2009	6	11	162	37	21.4	29.2	66.5	16.3386	20.3905	10.3251	2.84618	4.60393
						2009	6	12	163	37	20.5	28.75	66.5	13.9347	18.3938	9.05648	2.47256	4.17284
						2009	6	13	164	34	19	26.5	55	17.625	21.15	10.9218	2.83769	4.60039
						2009	6	14	165	35	19.6	27.3	54	19.4051	23.9071	12.1842	3.22285	5.20126
						2009	6	15	166	35	19.4	27.2	44.5	16.0205	19.9936	10.1242	2.67202	4.75924
						2009	6	16	167	35	19	27	41	17.4153	22.2916	11.1458	2.92858	5.48362
						2009	6	17	168	30.5	18.6	24.55	38	18.7752	17.874	10.3628	2.57395	4.50018
						2009	6	18	169	37	19.5	28.25	38.5	13.8873	19.4422	9.29514	2.51046	5.07623
						2009	6	19	170	36.2	20	28.1	36	12.4052	16.0771	7.9888	2.15061	4.40614
						2009	6	20	171	38	20.5	29.25	39	15.2635	21.3689	10.2163	2.81916	5.56248
						2009	6	21	172	35.2	20	27.6	34	17.2166	20.9354	10.7397	2.85966	5.68159
						2009	6	22	173	36	21	28.5	24	17.1892	20.627	10.6517	2.89247	6.32763
						2009	6	23	174	37.8	19.2	28.5	29.5	17.2202	25.6237	11.8827	3.22674	7.27717
						2009	6	24	175	40	20.2	30.1	22.5	16.1551	25.5896	11.5017	3.23121	7.97662
						2009	6	25	176	39.5	22	30.75	32	15.9047	22.2666	10.6454	3.03125	6.37993
						2009	6	26	177	39	20	29.5	27.5	16.2455	24.6932	11.33	3.14311	7.27328
						2009	6	27	178	33.5	20.6	27.05	27	19.4536	20.0761	11.1793	2.94066	5.87269
						2009	6	28	179	34.5	19	26.75	24	17.5876	21.8086	11.0788	2.89473	6.50992
						2009	6	29	180	34.8	19.2	27	27.5	17.3125	21.606	10.9406	2.87467	6.24015
						2009	6	30	181	37	19	28	39	14.7478	21.2368	10.0111	2.68916	5.4487
						2009	7	1	182	38.8	20	29.4	34	14.5392	21.867	10.0865	2.79222	6.04169
						2009	7	2	183	37.8	17.6	27.7	43	3.75549	6.06888	2.70061	0.720679	1.80483
						2009	7	3	184	36.5	18	27.25	43.5	7.73899	11.4537	5.32586	1.40719	2.95939
						2009	7	4	185	34	17.8	25.9	36	2.98427	3.86761	1.92183	0.492567	1.40343
						2009	7	5	186	32.6	19.6	26.1	46.5	4.52893	4.71009	2.61269	0.672698	1.40561
						2009	7	6	187	34.2	20.4	27.3	37	3.34186	3.68941	1.98631	0.525403	1.37103
						2009	7	7	188	36	21.4	28.7	56	3.15039	3.67966	1.92602	0.525269	1.17466
						2009	7	8	189	38	21	29.5	18.5	1.4217	1.93351	0.937888	0.260184	1.19894
						2009	7	9	190	39.2	23	31.1	17	8.66024	11.2237	5.57708	1.5995	4.09692
						2009	7	10	191	40	19.5	29.75	25	1.17906	1.93366	0.854148	0.238205	1.12539
						2009	7	11	192	39	21	30	33	1.05473	1.51882	0.715977	0.200722	0.92695
						2009	7	12	193	35	21	28	31.5	2.55976	2.86694	1.53244	0.41164	1.26506
						2009	7	13	194	35	20.6	27.8	41	2.68947	3.09827	1.63293	0.436717	1.179
						2009	7	14	195	33.6	19.6	26.6	64.5	15.0019	16.8021	8.98111	2.33874	3.74482
						2009	7	15	196	33	19	26	50	4.40615	4.93489	2.63781	0.677619	1.38099
						2009	7	16	197	34.4	19	26.7	26	4.74124	5.84121	2.97696	0.776963	2.11401
						2009	7	17	198	35.2	21	28.1	24.5	0.805558	0.915114	0.485692	0.13075	0.828623
						2009	7	18	199	36.8	21.2	29	24	10.9321	13.6433	6.90855	1.89627	4.40859
						2009	7	19	200	37.8	23.4	30.6	21	3.39287	3.90858	2.06	0.584765	1.76483
						2009	7	20	201	38.2	22	30.1	27.5	7.17785	9.3025	4.62245	1.2986	3.11469
						2009	7	21	202	39.2	23	31.1	35.5	20.6038	26.7025	13.2686	3.80542	7.26875
						2009	7	22	203	39.6	22	30.8	36.5	17.422	24.5302	11.6943	3.33333	6.61982
						2009	7	23	204	38.2	23.2	30.7	25.5	19.2466	23.0959	11.9267	3.39257	7.08068
						2009	7	24	205	38.4	20.4	29.4	24	15.4324	22.2227	10.4759	2.90002	6.84435
						2009	7	25	206	37	21	29	30.5	18.4882	23.6649	11.8325	3.2478	6.7281
						2009	7	26	207	39	21.4	30.2	25	16.8793	23.7661	11.33	3.18963	7.26805
						2009	7	27	208	40.6	23	31.8	30	20.8652	29.3782	14.0055	4.07426	8.52235
						2009	7	28	209	40	22	31	27	18.4301	26.5393	12.5108	3.58073	7.94624
						2009	7	29	210	37.5	21	29.25	19.5	18.5538	24.4911	12.0586	3.32754	7.82014
						2009	7	30	211	38	21.2	29.6	29	19.1919	25.7939	12.5861	3.49895	7.45787
						2009	7	31	212	37.4	21	29.2	26.5	18.4746	24.2387	11.9706	3.29976	7.2022
						2009	8	1	213	36.2	22	29.1	30	17.9306	20.3692	10.8108	2.97372	5.90683
						2009	8	2	214	35.2	21	28.1	51	21.0001	23.8561	12.6615	3.40852	5.244
						2009	8	3	215	37.4	22	29.7	43.5	19.9652	24.5972	12.5359	3.49234	6.00726
						2009	8	4	216	38	24.4	31.2	40	19.1308	20.8143	11.2882	3.24405	5.48004
						2009	8	5	217	40	24.6	32.3	47.5	18.1514	22.3626	11.397	3.34886	5.36127
						2009	8	6	218	38	23	30.5	63	18.8919	22.6702	11.7069	3.31631	5.14523
						2009	8	7	219	36.2	22.4	29.3	65.5	18.4281	20.3447	10.9532	3.02573	4.59986
						2009	8	8	220	36.4	22	29.2	63	15.1851	17.4933	9.21977	2.54148	4.01059
						2009	8	9	221	37	23	30	52	18.2121	20.3975	10.9029	3.05661	4.64743
						2009	8	10	222	34.4	22	28.2	45	24.0555	23.8631	13.5533	3.65655	5.62703
						2009	8	11	223	34.2	20.8	27.5	39	19.5376	20.9443	11.4431	3.04025	5.34646
						2009	8	12	224	34	20.8	27.4	46.5	20.787	21.9511	12.0837	3.20336	5.05697
						2009	8	13	225	36.4	21.6	29	70	16.4886	19.5225	10.1493	2.7858	4.41584
						2009	8	14	226	37	21.2	29.1	54.5	16.2151	20.4958	10.3126	2.83667	4.62011
						2009	8	15	227	39	22	30.5	62.5	16.413	22.3216	10.8276	3.06723	5.07279
						2009	8	16	228	40.8	22	31.4	70.5	11.9772	18.0137	8.3091	2.39766	4.21744
						2009	8	17	229	40	22	31	62	14.6552	21.1036	9.94831	2.84733	4.84544
						2009	8	18	230	39.2	21.6	30.4	69	11.1437	15.6903	7.48008	2.11456	3.69079
						2009	8	19	231	42	19.8	30.9	75	17.6617	31.3673	13.3147	3.80301	6.98229
						2009	8	20	232	39.2	23	31.1	91	20.6753	26.7952	13.3147	3.81862	6.04084
						2009	8	21	233	39	21.8	30.4	67	15.5601	21.4107	10.3251	2.91885	4.8782
						2009	8	22	234	38	22	30	67.5	14.1508	18.113	9.05648	2.53896	4.17528
						2009	8	23	235	38	21	29.5	55	16.5558	22.5158	10.9218	3.02986	5.05664
						2009	8	24	236	37.5	20	28.75	62.5	18.2036	25.485	12.1842	3.32647	5.61743
						2009	8	25	237	36.4	21	28.7	75	16.1242	19.865	10.1242	2.76109	4.46989
						2009	8	26	238	36.8	21.4	29.1	73	17.7513	21.8696	11.1458	3.06586	4.90113
						2009	8	27	239	36.2	22	29.1	77	17.1876	19.5251	10.3628	2.85049	4.42153
						2009	8	28	240	36.8	21.6	29.2	78.5	14.901	18.1196	9.29514	2.56225	4.13885
						2009	8	29	241	36.4	19.6	28	73.5	12.1817	16.3722	7.9888	2.14593	3.72678
						2009	8	30	242	35.5	20	27.75	75	16.2184	20.1108	10.2163	2.72929	4.46742
						2009	8	31	243	37	21	29	71	16.7807	21.4793	10.7397	2.94784	4.81564
						2009	9	1	244	37	20	28.5	48.5	16.1464	21.9591	10.6517	2.89247	4.98912
						2009	9	2	245	36.2	21.2	28.7	51.5	19.1756	23.0108	11.8827	3.24068	5.11033
						2009	9	3	246	36.8	21.4	29.1	54	18.3181	22.5679	11.5017	3.16375	5.04398
						2009	9	4	247	38.6	21.6	30.1	66.5	16.1369	21.9462	10.6454	2.99066	4.97298
						2009	9	5	248	39.5	21	30.25	68.5	16.4636	24.3661	11.33	3.19295	5.4827
						2009	9	6	249	37.6	21	29.3	71.5	17.1491	22.7739	11.1793	3.08818	5.09795
						2009	9	7	250	35	22	28.5	72	19.2044	19.9726	11.0788	3.00844	4.48099
						2009	9	8	251	35.2	19.8	27.5	87	17.4246	21.4671	10.9406	2.90676	4.72527
						2009	9	9	252	32.5	19.6	26.05	88.5	17.4208	17.9782	10.0111	2.57466	3.9479
						2009	9	10	253	33	17.6	25.3	80	16.0642	19.7911	10.0865	2.54968	4.2584
						2009	9	11	254	35	19.4	27.2	80.5	4.27347	5.33329	2.70061	0.71276	1.48325
						2009	9	12	255	35.2	19.4	27.3	80	8.37417	10.5849	5.32586	1.40875	2.53589
						2009	9	13	256	30.8	21	25.9	58	3.83692	3.00814	1.92183	0.492567	1.00081
						2009	9	14	257	32.5	20	26.25	35	4.61862	4.61862	2.61269	0.674996	1.60702
						2009	9	15	258	34	20.3	27.15	30	3.35403	3.67602	1.98631	0.523655	1.48032
						2009	9	16	259	32.5	20.7	26.6	22.5	3.50429	3.30805	1.92602	0.501547	1.49037
						2009	9	17	260	32	18.9	25.45	19.5	1.61955	1.69729	0.937888	0.237906	1.06054
						2009	9	18	261	29.1	20.1	24.6	16.5	11.6189	8.36563	5.57708	1.38689	2.9771
						2009	9	19	262	26.2	17.5	21.85	30.5	1.8099	1.25969	0.854148	0.19863	0.787236
						2009	9	20	263	28.9	14.8	21.85	34.5	1.19171	1.34425	0.715977	0.166498	0.771037
						2009	9	21	264	25.5	14.2	19.85	39.5	2.84921	2.57569	1.53244	0.33839	0.947399
						2009	9	22	265	26.6	11	18.8	44.5	2.58396	3.22478	1.63293	0.350523	0.98841
						2009	9	23	266	28.2	17.2	22.7	56.5	16.9244	14.8935	8.98111	2.13331	3.1701
						2009	9	24	267	29.3	16.4	22.85	76.5	4.59017	4.73705	2.63781	0.628886	1.27766
						2009	9	25	268	30.8	18	24.4	63.5	5.20053	5.32534	2.97696	0.736806	1.4236
						2009	9	26	269	31.2	16.6	23.9	62	0.794446	0.927913	0.485692	0.118786	0.5748
						2009	9	27	270	30	17.8	23.9	58	12.362	12.0653	6.90855	1.68963	2.69605
						2009	9	28	271	24	14	19	37	4.07144	3.25715	2.06	0.444615	1.09835
						2009	9	29	272	24	10.1	17.05	27.5	7.74898	8.61687	4.62245	0.944806	2.33327
						2009	9	30	273	26	12.8	19.4	44	22.8254	24.1036	13.2686	2.89492	4.97183
						2009	10	1	274	29	15.7	22.35	53	20.0414	21.3241	11.6943	2.75377	4.34335
						2009	10	2	275	31.5	16.2	23.85	53.5	19.057	23.3257	11.9267	2.91341	4.83684
						2009	10	3	276	32.6	18.8	25.7	49	17.6251	19.4581	10.4759	2.67268	4.27828
						2009	10	4	277	31	18.5	24.75	54	20.917	20.917	11.8325	2.95286	4.44079
						2009	10	5	278	29	16.1	22.55	75	19.7159	20.3468	11.33	2.68128	4.17695
						2009	10	6	279	28	17.1	22.55	80	26.5134	23.1197	14.0055	3.31444	4.69317
						2009	10	7	280	30	17.5	23.75	65.5	22.1161	22.1161	12.5108	3.04876	4.59916
						2009	10	8	281	27.6	18.3	22.95	66.5	24.7135	18.3868	12.0586	2.88198	3.8388
						2009	10	9	282	29.5	17.3	23.4	61	22.5212	21.9807	12.5861	3.04129	4.54711
						2009	10	10	283	29.8	19.4	24.6	66	23.1996	19.3021	11.9706	2.97681	4.11959
						2009	10	11	284	30.7	16.2	23.45	71	17.7442	20.5832	10.8108	2.61548	4.28668
						2009	10	12	285	30.4	19.5	24.95	68.5	23.9691	20.901	12.6615	3.1746	4.45117
						2009	10	13	286	29	18.3	23.65	72.5	23.9521	20.503	12.5359	3.04753	4.28565
						2009	10	14	287	27.8	13.5	20.65	80.5	18.6567	21.3433	11.2882	2.54558	4.2078
						2009	10	15	288	30.3	15.4	22.85	76	18.4535	21.9965	11.397	2.71719	4.50771
						2009	10	16	289	31.5	20.8	26.15	66	22.3681	19.1471	11.7069	3.01764	4.18367
						2009	10	17	290	34	20.1	27.05	27.5	18.3617	20.4182	10.9532	2.88119	5.93127
						2009	10	18	291	33	21	27	37.5	16.6345	15.9691	9.21977	2.42251	4.24159
						2009	10	19	292	33.1	21.2	27.15	42.5	19.7538	18.8056	10.9029	2.87436	4.61948
						2009	10	20	293	31.8	20.4	26.1	84	25.0884	22.8806	13.5533	3.48962	4.91575
						2009	10	21	294	29.5	20.9	25.2	73	24.3878	16.7788	11.4431	2.88589	3.66675
						2009	10	22	295	29.5	17	23.25	61.5	21.3611	21.3611	12.0837	2.90925	4.41893
						2009	10	23	296	29.5	19.8	24.65	45	20.3671	15.8049	10.1493	2.52686	3.69511
						2009	10	24	297	29	19.8	24.4	53	21.2497	15.6398	10.3126	2.55239	3.40376
						2009	10	25	298	27.3	19.2	23.25	54.5	23.7777	15.4079	10.8276	2.60683	3.29716
						2009	10	26	299	26.3	18.4	22.35	50.5	18.4765	11.6772	8.3091	1.95663	2.55384
						2009	10	27	300	22	14	18	40	21.9829	14.069	9.94831	2.08882	3.12268
						2009	10	28	301	21.8	13.9	17.85	44	16.6331	10.5121	7.48008	1.56399	2.30475
						2009	10	29	302	18	12.2	15.1	46.5	34.5538	16.033	13.3147	2.56918	2.95931
						2009	10	30	303	16.9	11.2	14.05	95	34.8556	15.8942	13.3147	2.48718	2.69639
						2009	10	31	304	18.5	12.7	15.6	58.5	26.7955	12.4331	10.3251	2.0226	2.29522
						2009	11	1	305	15.8	11.6	13.7	46	27.6194	9.28013	9.05648	1.67316	1.77869
						2009	11	2	306	14	10.2	12.1	57	35.0172	10.6452	10.9218	1.91528	1.76273
						2009	11	3	307	15.3	7.8	11.55	64.5	27.8064	16.6839	12.1842	2.09736	2.53182
						2009	11	4	308	13.2	9	11.1	55.5	30.8755	10.3742	10.1242	1.71603	1.64327
						2009	11	5	309	15.6	10.5	13.05	79	30.8465	12.5854	11.1458	2.01667	2.11655
						2009	11	6	310	19	11	15	67.5	22.8988	14.6552	10.3628	1.99352	2.59551
						2009	11	7	311	21	12.3	16.65	75	19.6959	13.7084	9.29514	1.87808	2.57641
						2009	11	8	312	21.5	13.4	17.45	82.5	17.5436	11.3683	7.9888	1.65161	2.24353
						2009	11	9	313	23.5	15.1	19.3	91	22.0309	14.8048	10.2163	2.22298	2.94698
						2009	11	10	314	23.5	13.1	18.3	70	20.8139	17.3172	10.7397	2.27387	3.30621
						2009	11	11	315	21.1	11.6	16.35	75	21.5992	16.4154	10.6517	2.13343	2.99186
						2009	11	12	316	19.2	11.5	15.35	49	26.7639	16.4866	11.8827	2.31029	2.95418
						2009	11	13	317	15	9.2	12.1	68	29.8489	13.8499	11.5017	2.01698	2.20629
						2009	11	14	318	16.5	7.2	11.85	71.5	21.8174	16.2321	10.6454	1.85121	2.50675
						2009	11	15	319	16.3	5.8	11.05	70	21.8533	18.3567	11.33	1.9171	2.68869
						2009	11	16	320	12	7.4	9.7	70.5	32.5773	11.9885	11.1793	1.80308	1.71392
						2009	11	17	321	15.5	6.9	11.2	66	23.6115	16.2447	11.0788	1.88434	2.4297
						2009	11	18	322	17	7.4	12.2	63	22.0692	16.9492	10.9406	1.925	2.64728
						2009	11	19	323	16.6	6.6	11.6	84	19.7862	15.829	10.0111	1.72623	2.42243
						2009	11	20	324	17	6.1	11.55	74	19.0944	16.6503	10.0865	1.73626	2.5273
						2009	11	21	325	18.5	7.6	13.05	71	5.11245	4.45806	2.70061	0.488636	0.944391
						2009	11	22	326	17.3	7.7	12.5	56.5	10.7432	8.25079	5.32586	0.946457	1.45711
						2009	11	23	327	19	6	12.5	30.5	3.33138	3.46463	1.92183	0.341528	1.00074
						2009	11	24	328	15	7.7	11.35	33	6.04375	3.52955	2.61269	0.446678	0.932609
						2009	11	25	329	11.5	7.7	9.6	41.5	6.36848	1.93602	1.98631	0.319202	0.546192
						2009	11	26	330	15	4.3	9.65	33	3.68001	3.15009	1.92602	0.310078	0.790373
						2009	11	27	331	15.3	5	10.15	38.5	1.82647	1.50501	0.937888	0.153745	0.52366
						2009	11	28	332	17.2	7	12.1	65.5	10.9141	8.90589	5.57708	0.978017	1.52198
						2009	11	29	333	19	6.6	12.8	36.5	1.51601	1.50388	0.854148	0.153293	0.611898
						2009	11	30	334	18.2	6.6	12.4	43	1.31386	1.21926	0.715977	0.126816	0.51069
						2009	12	1	335	17.6	7.5	12.55	34	3.01372	2.43509	1.53244	0.272779	0.785075
						2009	12	2	336	15.9	7.8	11.85	36.5	3.58596	2.3237	1.63293	0.283962	0.720323
						2009	12	3	337	13.1	6.9	10	39	22.5431	11.1814	8.98111	1.46434	1.90426
						2009	12	4	338	11.6	7.2	9.4	59	7.85954	2.76656	2.63781	0.420805	0.58
						2009	12	5	339	11.9	7.2	9.55	80.5	8.5823	3.22694	2.97696	0.477527	0.641174
						2009	12	6	340	9.2	6.6	7.9	68	1.88258	0.391577	0.485692	0.0732086	0.265388
						2009	12	7	341	9.8	6.1	7.95	76.5	22.4474	6.64443	6.90855	1.04336	0.937952
						2009	12	8	342	15	4.9	9.95	61	4.05123	3.2734	2.06	0.335273	0.663062
						2009	12	9	343	14.5	5.1	9.8	68	9.42298	7.08608	4.62245	0.748254	1.12407
						2009	12	10	344	10	7.4	8.7	75.5	51.4302	10.6975	13.2686	2.06224	1.45518
						2009	12	11	345	10.5	7.6	9.05	66.5	42.9195	9.95733	11.6943	1.84156	1.40535
						2009	12	12	346	10.5	7.8	9.15	74.5	45.3646	9.79876	11.9267	1.88515	1.39638
						2009	12	13	347	11	7.9	9.45	71.5	37.1869	9.22234	10.4759	1.67427	1.3554
						2009	12	14	348	14	4.4	9.2	74	23.8682	18.3308	11.8325	1.87373	2.40661
						2009	12	15	349	10	4.2	7.1	77	29.4033	13.6432	11.33	1.65462	1.56691
						2009	12	16	350	9	6.5	7.75	68	55.3617	11.0723	14.0055	2.09874	1.39
						2009	12	17	351	9	7.1	8.05	32.5	56.7266	8.62244	12.5108	1.89676	1.44972
						2009	12	18	352	13	7.6	10.3	42	32.4324	14.0108	12.0586	1.98733	2.26424
						2009	12	19	353	14.8	8.3	11.55	20.5	30.8543	16.0442	12.5861	2.16655	3.47619
						2009	12	20	354	13.6	8.9	11.25	37	34.5103	12.9759	11.9706	2.03954	2.37333
						2009	12	21	355	12	9.2	10.6	33	40.3794	9.04499	10.8108	1.80072	1.77639
						2009	12	22	356	14.7	8.7	11.7	36	32.3064	15.5071	12.6615	2.19066	2.86852
						2009	12	23	357	17.5	8.3	12.9	37.5	25.831	19.0116	12.5359	2.25715	3.56466
						2009	12	24	358	14.2	6.8	10.5	39.5	25.935	15.3535	11.2882	1.8736	2.56061
						2009	12	25	359	16	5.6	10.8	40	22.0879	18.3771	11.397	1.91172	3.03539
						2009	12	26	360	12.5	6.4	9.45	39	29.6248	14.4569	11.7069	1.871	2.29413
						2009	12	27	361	16	9.3	12.65	34	26.4474	14.1758	10.9532	1.95612	2.83422
						2009	12	28	362	12.8	7.7	10.25	40	25.5162	10.4106	9.21977	1.51677	1.79782
						2009	12	29	363	12.5	8.6	10.55	36	34.5058	10.7658	10.9029	1.81286	1.97471
						2009	12	30	364	13.3	8.8	11.05	28.5	39.9318	14.3755	13.5533	2.29329	2.83018
						2009	12	31	365	13.5	6.2	9.85	37	26.4704	15.4587	11.4431	1.85569	2.5568
																	627.4	1026.62
																	ETo-HS	ETo-TURC (Ousman Couly (2016)

## Sheet: 2010
	KİLİS					year	month	day	DOY	Tmax	Tmin	Tmean	RHmean	Ra	Rs=0.16(Tmax-Tmin)^0.5*Ra	Rs=from meteorological station	ETo-HS	ETo-TURC (Ousman Couly (2016)
	DOY	246					#	#		°C	°C	°C	%	MJ m-2 day-1*(0.408 mm day-1)
	φ (-)	36.71	0.64071			2010	1	1	1	13.8	4	8.9	57.5	13.5922	10.6563	6.80806	1.06611	1.47142
	tan(φ)		0.745649			2010	1	2	2	16.5	11.2	13.85	64.5	19.7956	8.39333	7.29166	1.35353	1.56015
	sin(φ)		0.597765			2010	1	3	3	13.8	9.3	11.55	83.5	23.4817	8.45341	7.96995	1.37193	1.42187
	cos(φ)		0.801671			2010	1	4	4	15.4	9.5	12.45	64	18.455	8.71077	7.17233	1.27249	1.5186
	dr	0.984766		(1+0.033*cos(2*3.14/365*DOY))		2010	1	5	5	12	5.1	8.55	94	5.26008	2.90356	2.21074	0.341653	0.562015
	δ	0.120494		(0.409*sin(2*3.14/365*DOY-1.39))		2010	1	6	6	11.8	4.2	8	73	19.393	11.7909	8.55404	1.29437	1.49673
	tan(δ)	0.121081				2010	1	7	7	13.5	6.1	9.8	78.5	11.6015	6.86809	5.04952	0.817386	1.09737
	sin(δ)	0.120203				2010	1	8	8	17.4	6.3	11.85	65.5	7.89383	7.00972	4.20793	0.731748	1.24498
	cos(δ)	0.992749				2010	1	9	9	17.5	8	12.75	69.5	15.4862	11.7695	7.63709	1.36838	1.97405
	X	0.991849				2010	1	10	10	15.5	8.8	12.15	65.5	8.55295	4.58438	3.5422	0.622212	0.925932		-
	ωs (eq. 25)	1.49314		(acos{(-1*tan(-0.35)*tan(0.409*sin(2*3.14/365*DOY-1.39))))		2010	1	11	11	12.5	6.8	9.65	67	3.38691	1.54443	1.29378	0.208292	0.441071
	sin ωs	0.996986				2010	1	12	12	11	6.8	8.9	67	16.0124	5.38016	5.2505	0.822204	0.86235
	sin φ*sin δ	-0.0718532		(sin(0.35)*sin(0.409*sin(2*3.14/365*DOY-1.39)))		2010	1	13	13	10.5	6.8	8.65	81.5	2.95898	0.875857	0.910672	0.141272	0.336277
	cos φ*cos δ	0.795859		(cos(0.35)*cos(0.409*sin(2*3.14/365*DOY-1.39))		2010	1	14	14	9.3	5	7.15	70	21.0118	7.22805	6.97135	1.02013	0.932436
	Gsc	0.082				2010	1	15	15	10	6.6	8.3	72	32.8261	8.9287	9.68453	1.48247	1.21679
						2010	1	16	16	13.3	7.1	10.2	65	26.9729	13.3786	10.7459	1.7647	1.94094
	Ra	25.4105				2010	1	17	17	13	8.9	10.95	49.5	32.3742	10.6187	10.4884	1.76855	1.67429
						2010	1	18	18	12.7	8.7	10.7	62	6.67303	2.13537	2.13537	0.356932	0.545352
						2010	1	19	19	11.9	7.3	9.6	95	13.5434	4.98396	4.64757	0.746869	0.855777
						2010	1	20	20	11	7.1	9.05	100	5.92322	1.84805	1.87159	0.294729	0.459384
						2010	1	21	21	11.5	4.3	7.9	99	24.4301	14.0717	10.4884	1.58093	1.72839
						2010	1	22	22	11.5	2.8	7.15	68	10.5799	7.36361	4.993	0.730634	0.946002
						2010	1	23	23	11	6.9	8.95	71.5	13.9965	4.59085	4.53452	0.711415	0.773947
						2010	1	24	24	10.2	5.5	7.85	79.5	7.13381	2.68231	2.47452	0.37226	0.508246
						2010	1	25	25	9	2.2	5.6	77.5	7.7974	4.24178	3.2533	0.446486	0.533591
						2010	1	26	26	5	-1.8	1.6	78.5	20.2311	11.0057	8.44099	0.960425	0.391293
						2010	1	27	27	5.1	-3.4	0.85	73	21.4073	14.557	9.98599	1.09229	0.276749
						2010	1	28	28	2.7	-1.4	0.65	98.5	20.8978	6.85449	6.77038	0.732618	0.115164
						2010	1	29	29	5.1	0.1	2.6	56	32.4057	12.9623	11.5938	1.38715	0.689325
						2010	1	30	30	6.9	1.8	4.35	97	32.9033	13.4246	11.889	1.5445	1.08121
						2010	1	31	31	10.2	4.8	7.5	60.5	26.6553	11.5151	9.91063	1.47058	1.40586
						2010	2	1	32	14.5	6.4	10.45	89.5	23.6673	15.3364	10.7773	1.78566	2.21819
						2010	2	2	33	13.1	5.6	9.35	99	6.65061	3.99037	2.91415	0.464034	0.723776
						2010	2	3	34	10.8	3.6	7.2	99	5.14933	2.96601	2.21074	0.324149	0.508334
						2010	2	4	35	7	-0.6	3.2	99	27.452	16.6908	12.1088	1.49138	1.02366
						2010	2	5	36	7.4	-2	2.7	98.5	8.39874	6.31585	4.12001	0.495359	0.397497
						2010	2	6	37	9	0.3	4.65	96.5	5.00383	3.48266	2.36147	0.310933	0.408804
						2010	2	7	38	8	-0.1	3.95	76	9.70967	6.29186	4.42147	0.56402	0.541614
						2010	2	8	39	7.2	3	5.1	73.5	9.30863	3.1277	3.05232	0.409953	0.410407
						2010	2	9	40	6.2	2	4.1	69	17.583	5.90788	5.7655	0.740541	0.532215
						2010	2	10	41	6	2.9	4.45	76	20.3324	5.04243	5.72782	0.747459	0.505871
						2010	2	11	42	10.4	4.1	7.25	72	23.4582	11.8229	9.42075	1.38408	1.40536
						2010	2	12	43	13	6.8	9.9	71	15.6698	7.77224	6.24282	1.01421	1.21555
						2010	2	13	44	14	6.6	10.3	95	4.67523	2.76774	2.03488	0.335362	0.613074
						2010	2	14	45	16.7	9.6	13.15	99.5	19.4455	11.045	8.29026	1.50486	1.90213
						2010	2	15	46	15.1	11.1	13.1	100	31.952	10.2247	10.2247	1.853	1.77971
						2010	2	16	47	17.2	10.5	13.85	82	34.3028	18.3863	14.2065	2.63711	3.04731
						2010	2	17	48	16.3	9	12.65	82	27.7489	16.2054	11.9958	2.14231	2.59477
						2010	2	18	49	17.9	9.2	13.55	76	9.52857	6.63188	4.49684	0.826823	1.28323
						2010	2	19	50	15.8	6.2	11	59.5	23.6528	18.1654	11.7257	1.98061	2.65657
						2010	2	20	51	18.5	7.5	13	76.5	17.5162	15.4142	9.29514	1.67909	2.51936
						2010	2	21	52	15.2	8.3	11.75	81.5	19.9644	11.0203	8.39075	1.45421	1.78521
						2010	2	22	53	15	5.9	10.45	80.5	30.761	22.394	14.8471	2.45996	3.11654
						2010	2	23	54	13.4	6.1	9.75	79	34.9259	20.3967	15.0983	2.4396	2.7461
						2010	2	24	55	13	4.4	8.7	81	32.0442	22.0464	15.0355	2.33686	2.74666
						2010	2	25	56	11	6.7	8.85	83	41.4935	14.2738	13.7669	2.15179	1.88235
						2010	2	26	57	10.2	6.3	8.25	92	40.7868	12.7255	12.8876	1.96901	1.6297
						2010	2	27	58	14.6	6.5	10.55	85.5	27.8877	18.0712	12.6992	2.11153	2.58072
						2010	2	28	59	9.8	6.9	8.35	87.5	40.0152	9.28353	10.9029	1.67218	1.26083
						2010	3	1	60	17	7.2	12.1	95	26.7832	20.998	13.4151	2.35253	3.19569
						2010	3	2	61	16.5	7.2	11.85	68.5	26.9017	20.0148	13.1262	2.28262	3.02429
						2010	3	3	62	12.2	6.7	9.45	84	33.0065	14.5229	12.3851	1.97941	1.99049
						2010	3	4	63	16	5.3	10.65	86.5	18.768	16.0654	9.8227	1.63901	2.33685
						2010	3	5	64	13	6.2	9.6	87	31.0089	16.8689	12.9378	2.07912	2.29356
						2010	3	6	65	15	5.5	10.25	42	30.1065	22.8809	14.8471	2.44255	3.50151
						2010	3	7	66	16.4	9.3	12.85	53	32.9984	18.7431	14.0683	2.52895	2.97984
						2010	3	8	67	16.1	8.8	12.45	63.5	4.70715	2.74897	2.03488	0.361021	0.680365
						2010	3	9	68	16.3	12.3	14.3	60.5	22.6491	7.2477	7.2477	1.3645	1.41276
						2010	3	10	69	20.5	10	15.25	49	21.0537	17.6851	10.9155	2.11584	3.13463
						2010	3	11	70	20.3	12	16.15	62	29.7751	19.7707	13.725	2.73287	3.51349
						2010	3	12	71	24	12.8	18.4	56	26.1794	23.4567	14.0181	2.97622	4.36283
						2010	3	13	72	20.1	11.8	15.95	93.5	32.3184	21.4594	14.8973	2.94884	3.7622
						2010	3	14	73	20.1	11	15.55	89.5	24.8535	18.0933	11.9958	2.34634	3.18474
						2010	3	15	74	23.2	13	18.1	64.5	20.3533	16.6083	10.4005	2.18986	3.16967
						2010	3	16	75	15.3	8.3	11.8	49.5	31.3342	17.5472	13.2644	2.30276	2.69947
						2010	3	17	76	15.1	3.8	9.45	35.5	31.5515	28.5226	16.9699	2.71215	4.42765
						2010	3	18	77	13.6	4.7	9.15	58.5	17.2629	12.2912	8.24002	1.30243	1.68912
						2010	3	19	78	14	2.5	8.25	79.5	6.66727	6.13388	3.61757	0.552704	0.904627
						2010	3	20	79	16.5	4.8	10.65	88	30.2501	28.3141	16.5554	2.76242	3.91341
						2010	3	21	80	20.1	6.9	13.5	68.5	17.7619	18.7566	10.3251	1.89543	3.06115
						2010	3	22	81	21.7	7.7	14.7	58	28.3253	31.7243	16.9573	3.23228	5.18827
						2010	3	23	82	23.6	9	16.3	60	27.2851	31.869	16.681	3.33614	5.48227
						2010	3	24	83	24.7	13.6	19.15	79.5	24.7418	21.9708	13.189	2.85822	4.18263
						2010	3	25	84	21.6	12.3	16.95	67.5	30.1196	22.409	14.6964	2.99525	4.0291
						2010	3	26	85	22.1	12.5	17.3	56.5	24.6283	18.9146	12.2093	2.51342	3.48754
						2010	3	27	86	22.7	11.3	17	48	26.5068	24.1742	14.3195	2.92265	4.44896
						2010	3	28	87	19.3	11	15.15	73	37.8501	25.1325	17.4472	3.37171	4.24048
						2010	3	29	88	17	7.1	12.05	56.5	34.2826	27.1518	17.2588	3.0215	4.03818
						2010	3	30	89	13.2	7.1	10.15	51	46.0265	22.4609	18.1883	2.98155	3.07155
						2010	3	31	90	18.1	6	12.05	66	25.9317	25.1019	14.4326	2.52672	3.7551
						2010	4	1	91	19.3	8	13.65	96.5	17.3522	15.6864	9.33282	1.72148	2.6255
						2010	4	2	92	21.8	8.9	15.35	71.5	6.53553	6.74466	3.75574	0.730209	1.38516
						2010	4	3	93	23.8	11.5	17.65	51.5	21.3103	20.9693	11.9581	2.48625	3.86428
						2010	4	4	94	24.5	13.2	18.85	56.5	25.783	23.3079	13.8673	2.98082	4.38441
						2010	4	5	95	23.6	13.7	18.65	61.5	18.6633	14.7813	9.39563	2.00859	2.89871
						2010	4	6	96	24.7	12.3	18.5	62.5	32.4159	32.1566	18.2637	3.88833	5.86281
						2010	4	7	97	18.3	10	14.15	75	33.7899	22.4365	15.5756	2.91867	3.69075
						2010	4	8	98	14.4	7.2	10.8	75.5	43.2134	24.8909	18.5526	3.11199	3.50125
						2010	4	9	99	17.5	6.6	12.05	86.5	27.8688	24.3016	14.7215	2.5773	3.64458
						2010	4	10	100	18.2	8.2	13.2	82	34.2349	27.3879	17.3216	3.14933	4.27743
						2010	4	11	101	13.4	8.3	10.85	55.5	56.1773	22.9203	20.2986	3.41082	3.25424
						2010	4	12	102	14.4	10.3	12.35	74.5	61.8405	20.2837	20.0348	3.54275	3.13191
						2010	4	13	103	19.6	8.7	14.15	72.5	25.7763	22.4769	13.6161	2.55148	3.69684
						2010	4	14	104	20.5	8.4	14.45	50	24.8936	24.097	13.8548	2.62058	3.98318
						2010	4	15	105	24.2	12.4	18.3	63.5	13.9981	13.2142	7.69361	1.62894	2.60723
						2010	4	16	106	25.1	16.6	20.85	50.5	33.6323	22.87	15.6887	3.55635	4.50011
						2010	4	17	107	25.5	15.8	20.65	69.5	33.4243	25.9372	16.6559	3.75606	5.03272
						2010	4	18	108	26.4	14.4	20.4	84	29.7336	28.5443	16.48	3.69224	5.47263
						2010	4	19	109	27	12.4	19.7	70.5	33.3873	38.9964	20.4116	4.48928	7.23096
						2010	4	20	110	28	13.5	20.75	94.5	27.9048	32.3695	17.0013	3.84392	6.20031
						2010	4	21	111	21.7	11.6	16.65	68	39.4501	31.8757	20.0599	4.05309	5.53915
						2010	4	22	112	19	9	14	72	42.9736	34.3788	21.7431	4.05524	5.45775
						2010	4	23	113	23.3	10.8	17.05	77.5	33.3518	33.3518	18.8666	3.85625	5.84485
						2010	4	24	114	25.1	12.5	18.8	34.5	27.3583	27.5771	15.538	3.33536	6.24808
						2010	4	25	115	26.7	13.3	20	36.5	11.6453	12.4838	6.82062	1.51211	3.07953
						2010	4	26	116	26.7	15.3	21	49.5	42.9689	39.1876	23.2127	5.28233	7.51768
						2010	4	27	117	23.5	16.6	20.05	76.5	54.0653	29.844	22.7228	5.04425	5.66294
						2010	4	28	118	17.5	11.5	14.5	66	43.6522	20.953	17.1081	3.24095	3.51113
						2010	4	29	119	22	10.3	16.15	66.5	31.3288	29.3238	17.1458	3.41401	5.04889
						2010	4	30	120	23.6	10.7	17.15	62	35.2132	36.34	20.2358	4.14796	6.35499
						2010	5	1	121	20	11.4	15.7	62	44.0106	30.2793	20.6503	4.05732	5.13163
						2010	5	2	122	22.1	10.1	16.1	57.5	30.2322	29.0229	16.7564	3.33156	4.99307
						2010	5	3	123	25	10.7	17.85	58.5	33.3828	38.1899	20.1981	4.22316	6.78504
						2010	5	4	124	26.7	11.6	19.15	62.5	36.8301	44.4907	22.8987	4.96242	8.09741
						2010	5	5	125	27.7	12.5	20.1	61	36.9705	44.9561	23.062	5.1263	8.35169
						2010	5	6	126	28.6	14.3	21.45	62.5	32.7599	37.4774	19.8213	4.56288	7.2182
						2010	5	7	127	29.8	14.3	22.05	54.5	27.8371	34.518	17.5352	4.09832	6.75395
						2010	5	8	128	29.9	14.4	22.15	56.5	33.6199	41.6886	21.1778	4.96211	8.09168
						2010	5	9	129	28.8	14.1	21.45	73.5	37.5325	44.1383	23.0243	5.30023	8.43333
						2010	5	10	130	33.2	18.5	25.85	81.5	37.3278	43.8975	22.8987	5.86223	9.02131
						2010	5	11	131	31.9	20.5	26.2	79.5	42.1783	38.4666	22.7857	5.88007	7.99516
						2010	5	12	132	32.1	17.5	24.8	88	37.8321	44.1879	23.129	5.77875	8.9393
						2010	5	13	133	32.7	18.3	25.5	76.5	38.3559	44.1861	23.2881	5.91412	9.0324
						2010	5	14	134	32.5	16.6	24.55	63	37.5257	47.7327	23.9413	5.9466	9.58724
						2010	5	15	135	33.4	15.8	24.6	37	33.6837	47.4267	22.6098	5.62251	11.3066
						2010	5	16	136	32.8	20.9	26.85	57	41.4496	39.46	22.8778	5.99105	8.26383
						2010	5	17	137	27.9	17.7	22.8	84.5	38.5926	31.4915	19.7208	4.69589	6.27922
						2010	5	18	138	25	12.8	18.9	58.5	38.3782	37.4572	21.4479	4.61657	6.83501
						2010	5	19	139	23.3	13.1	18.2	70	42.3781	34.5805	21.6552	4.57227	6.23178
						2010	5	20	140	25.2	13.1	19.15	67	39.3603	38.1007	21.9064	4.74737	6.9866
						2010	5	21	141	26.5	14.3	20.4	57	40.0977	39.1353	22.4088	5.02054	7.36466
						2010	5	22	142	29.8	12.8	21.3	56.5	32.864	44.6951	21.6803	4.97176	8.51024
						2010	5	23	143	24	14.7	19.35	39.5	41.0862	30.5681	20.0474	4.36801	6.5585
						2010	5	24	144	25.6	11.3	18.45	53.5	37.2027	42.5599	22.5093	4.78562	7.63453
						2010	5	25	145	28.2	13.7	20.95	39.5	36.6154	42.4738	22.3083	5.06999	9.25821
						2010	5	26	146	31.9	15.4	23.65	47.5	33.0103	43.5737	21.4542	5.2156	8.97127
						2010	5	27	147	33	18.7	25.85	59	37.9916	43.4624	22.9866	5.88474	8.93596
						2010	5	28	148	30.7	13.5	22.1	63.5	30.6659	42.1962	20.3488	4.7619	8.17803
						2010	5	29	149	29.8	15.8	22.8	61	37.7251	42.2521	22.5847	5.37784	8.29126
						2010	5	30	150	33	17.3	25.15	57	33.3852	41.9318	21.1653	5.33157	8.54835
						2010	5	31	151	34.5	22.2	28.35	51	40.7178	40.0663	22.8485	6.18439	8.5465
						2010	6	1	152	36.6	24.3	30.45	63.5	32.8608	32.335	18.4395	5.21814	7.14972
						2010	6	2	153	36.6	22.5	29.55	58	33.4723	37.7568	20.1102	5.58475	8.19341
						2010	6	3	154	31	16.9	23.95	50	32.0925	36.2003	19.2811	4.72125	7.29875
						2010	6	4	155	35	17.3	26.15	62	32.5808	46.1344	21.9315	5.65321	9.50015
						2010	6	5	156	35.2	18.4	26.8	34.5	33.7486	45.3581	22.1325	5.78939	11.5188
						2010	6	6	157	31.4	17	24.2	44.5	36.3699	41.8981	22.0822	5.43952	9.07978
						2010	6	7	158	27.5	17.3	22.4	60	49.0642	40.0364	25.0718	5.91124	7.82154
						2010	6	8	159	26.2	15.4	20.8	70.5	46.1052	39.8349	24.2427	5.48829	7.55116
						2010	6	9	160	30	15.6	22.8	72.5	40.1351	46.2357	24.3683	5.80256	9.03613
						2010	6	10	161	28.8	16.3	22.55	56.5	42.7889	42.7889	24.205	5.72819	8.35488
						2010	6	11	162	31.3	15.5	23.4	66.5	38.454	48.6059	24.4563	5.90956	9.57677
						2010	6	12	163	36.8	19.8	28.3	66.5	37.2148	50.6121	24.5505	6.63787	10.678
						2010	6	13	164	37.3	28.8	33.05	55	50.812	34.5522	23.7026	7.06895	7.81306
						2010	6	14	165	34.8	19.7	27.25	54	37.4968	45.2961	23.3132	6.15978	9.47441
						2010	6	15	166	32	17.5	24.75	44.5	40.0996	46.5155	24.4311	6.09693	10.1189
						2010	6	16	167	36.6	20.7	28.65	41	37.3288	47.4822	23.8157	6.48808	11.3833
						2010	6	17	168	36.6	21.9	29.25	38	37.4711	44.066	22.9866	6.34312	11.0795
						2010	6	18	169	37	23.9	30.45	38.5	39.4332	41.326	22.8359	6.46225	10.4984
						2010	6	19	170	36.6	23.9	30.25	36	39.4326	40.0635	22.4842	6.33634	10.483
						2010	6	20	171	36.6	20.3	28.45	39	35.1957	45.8951	22.7354	6.16712	11.2706
						2010	6	21	172	36.6	19.5	28.05	34	34.0208	46.5404	22.5093	6.05298	12.0678
						2010	6	22	173	36.6	19.8	28.2	24	34.553	46.4393	22.66	6.11345	13.468
						2010	6	23	174	28	18.9	23.45	29.5	45.3348	33.0037	21.8813	5.29376	8.57804
						2010	6	24	175	25.3	16.1	20.7	22.5	46.4725	34.2037	22.5533	5.09259	9.08661
						2010	6	25	176	28.9	16.4	22.65	32	40.8571	40.8571	23.1122	5.48313	10.0689
						2010	6	26	177	28.4	15.6	22	27.5	39.8488	40.8052	22.8108	5.32465	10.448
						2010	6	27	178	30.3	17.4	23.85	27	39.2132	40.468	22.5344	5.50465	10.7603
						2010	6	28	179	30.2	16.7	23.45	24	38.8447	41.9522	22.8359	5.52472	11.4196
						2010	6	29	180	31.1	15.4	23.25	27.5	32.4936	40.812	20.6	4.95963	10.6825
						2010	6	30	181	34	18.3	26.15	39	33.6428	42.2554	21.3286	5.4978	10.1088
						2010	7	1	182	36.6	20	28.3	34	32.3905	43.0146	21.115	5.70901	11.2275
						2010	7	2	183	36.2	20.4	28.3	43	32.2524	40.767	20.5121	5.54599	9.55157
						2010	7	3	184	36.8	22.1	29.45	43.5	29.6698	34.8916	18.2009	5.04385	8.30089
						2010	7	4	185	36.2	23.6	29.9	36	38.1733	38.4787	21.6803	6.06529	10.0498
						2010	7	5	186	36.8	23.7	30.25	46.5	39.5634	41.4624	22.9113	6.4567	9.47698
						2010	7	6	187	37.5	22.5	30	37	35.858	43.0296	22.2204	6.22943	11.0565
						2010	7	7	188	35.4	19.6	27.5	56	32.9437	41.6408	20.9517	5.56655	8.77188
						2010	7	8	189	34.8	19.9	27.35	18.5	38.5204	45.9163	23.7905	6.29985	13.9358
						2010	7	9	190	33.5	19.1	26.3	17	37.9215	43.6856	23.0243	5.95516	13.2966
						2010	7	10	191	36.5	18	27.25	25	33.2557	49.2185	22.8861	6.04694	13.9225
						2010	7	11	192	38	22.7	30.35	33	36.2875	44.4159	22.7103	6.41338	11.9915
						2010	7	12	193	37	21.3	29.15	31.5	38.4772	48.3274	24.3935	6.71703	13.0465
						2010	7	13	194	36.8	21.4	29.1	41	37.0097	45.596	23.2378	6.392	11.0087
						2010	7	14	195	36	21.1	28.55	64.5	36.6697	43.7102	22.6475	6.15655	9.30781
						2010	7	15	196	36.1	20.4	28.25	50	35.743	44.8932	22.66	6.1201	9.51342
						2010	7	16	197	36.8	22.4	29.6	26	37.7353	43.4711	22.9113	6.36935	12.5876
						2010	7	17	198	35.7	21.4	28.55	24.5	38.6144	44.1749	23.3635	6.35119	12.8273
						2010	7	18	199	35.3	22.3	28.8	24	39.2145	40.783	22.6224	6.18289	11.985
						2010	7	19	200	37	22.6	29.8	21	36.8664	42.4701	22.3837	6.24895	12.9952
						2010	7	20	201	37	23.1	30.05	27.5	39.503	43.9273	23.5644	6.61313	12.5741
						2010	7	21	202	37	22.9	29.95	35.5	36.8802	41.6009	22.1576	6.20532	10.8938
						2010	7	22	203	36.5	23.6	30.05	36.5	38.0984	39.3176	21.8938	6.14429	10.2136
						2010	7	23	204	35.4	22.8	29.1	25.5	39.257	39.5711	22.2958	6.13287	11.5048
						2010	7	24	205	35.3	22.9	29.1	24	37.4098	37.1105	21.0774	5.79772	10.9972
						2010	7	25	206	35	23.1	29.05	30.5	38.2787	36.4413	21.1276	5.80534	10.0716
						2010	7	26	207	36.2	22.7	29.45	25	36.8362	39.7831	21.6552	6.00111	11.6717
						2010	7	27	208	36.5	23	29.75	30	36.2272	39.1254	21.2972	5.93937	10.9209
						2010	7	28	209	37.1	22.7	29.9	27	36.2664	41.7789	22.0194	6.16017	12.0317
						2010	7	29	210	36.2	21.3	28.75	19.5	33.2325	39.6132	20.5247	5.60356	12.1972
						2010	7	30	211	38.1	23	30.55	29	35.1532	42.4651	21.8561	6.19781	12.0427
						2010	7	31	212	38	27.6	32.8	26.5	43.2832	36.0116	22.3335	6.62788	10.8259
						2010	8	1	213	37.1	30.2	33.65	30	52.7203	29.1016	22.1576	6.68615	8.59897
						2010	8	2	214	38	30.4	34.2	51	49.7497	30.2478	21.9441	6.6925	6.9684
						2010	8	3	215	40	28.4	34.2	43.5	37.8254	35.102	20.6126	6.28643	8.75862
						2010	8	4	216	38.1	25.3	31.7	40	37.83	38.7379	21.6552	6.28687	9.81869
						2010	8	5	217	38	22.7	30.35	47.5	35.9262	43.9737	22.4842	6.34953	9.89787
						2010	8	6	218	37.1	22.4	29.75	63	34.9526	41.1042	21.4416	5.97966	8.90187
						2010	8	7	219	37.1	23.7	30.4	65.5	36.137	38.7388	21.1653	5.98328	8.47513
						2010	8	8	220	37.1	24.2	30.65	63	37.3115	38.5055	21.4416	6.09284	8.44946
						2010	8	9	221	37.1	21.5	29.3	52	33.015	41.2027	20.8638	5.76345	8.87648
						2010	8	10	222	38.4	22.3	30.35	45	32.0777	41.316	20.5938	5.81567	9.64842
						2010	8	11	223	38.2	22.8	30.5	39	33.0887	40.7652	20.7759	5.88538	10.3048
						2010	8	12	224	38	22.6	30.3	46.5	34.139	42.0592	21.4353	6.04705	9.6121
						2010	8	13	225	38.9	22.8	30.85	70	34.1027	43.9243	21.8938	6.24701	9.59776
						2010	8	14	226	38	24.9	31.45	54.5	37.7631	39.5757	21.8687	6.3168	8.74531
						2010	8	15	227	38	25	31.5	62.5	36.7323	38.2015	21.1904	6.12709	8.46123
						2010	8	16	228	38.8	26.3	32.55	70.5	33.485	33.485	18.942	5.59362	7.54931
						2010	8	17	229	37.1	26.4	31.75	62	37.8001	32.3569	19.7836	5.74932	7.25227
						2010	8	18	230	37.1	26.4	31.75	69	31.4881	26.9538	16.48	4.78927	6.11473
						2010	8	19	231	37.5	25.3	31.4	75	27.8256	27.1578	15.5505	4.48723	6.13574
						2010	8	20	232	37.5	27.4	32.45	91	30.3843	24.5505	15.45	4.55337	5.64784
						2010	8	21	233	38.5	29.7	34.1	67	27.6421	19.4601	13.12	3.99363	4.63963
						2010	8	22	234	38.5	26.5	32.5	67.5	34.2662	32.8955	18.9922	5.60289	7.42061
						2010	8	23	235	38.2	25.6	31.9	55	33.75	34.02	19.1681	5.58731	7.61389
						2010	8	24	236	37.1	24.4	30.75	62.5	35.3572	35.9229	20.1604	5.74059	7.92039
						2010	8	25	237	37.5	22.9	30.2	75	25.5182	29.8052	15.6008	4.39193	6.60626
						2010	8	26	238	37.1	23.7	30.4	73	31.9442	34.2442	18.7096	5.28908	7.54215
						2010	8	27	239	37.6	24	30.8	77	32.6771	35.5527	19.2811	5.49588	7.84743
						2010	8	28	240	38.2	23.4	30.8	78.5	30.2836	35.8558	18.6405	5.31328	7.91061
						2010	8	29	241	37.1	22	29.55	73.5	31.2944	37.8037	19.457	5.40336	8.20305
						2010	8	30	242	37.1	21	29.05	75	31.4124	40.4592	20.1667	5.54131	8.69868
						2010	8	31	243	37.1	21.2	29.15	71	30.4379	38.7171	19.4193	5.34733	8.35227
						2010	9	1	244	36.6	21.7	29.15	48.5	32.9274	39.2495	20.3363	5.59983	8.64257
						2010	9	2	245	33.5	19.7	26.6	51.5	33.644	37.143	19.9971	5.20737	7.77681
						2010	9	3	246	34.4	20.5	27.45	54	32.1541	35.7553	19.1806	5.09038	7.58645
						2010	9	4	247	36.3	20.2	28.25	66.5	31.3244	40.3458	20.1102	5.43142	8.59264
						2010	9	5	248	36.6	21.3	28.95	68.5	30.5674	37.4145	19.1304	5.24534	8.06674
						2010	9	6	249	35.3	21.6	28.45	71.5	32.1334	35.2182	19.0299	5.16198	7.57283
						2010	9	7	250	33	20.5	26.75	72	31.6642	31.6642	17.912	4.68015	6.70436
						2010	9	8	251	34.6	19.6	27.1	87	30.2837	36.3405	18.7661	4.94185	7.66875
						2010	9	9	252	36.6	22.4	29.5	88.5	30.9376	35.1451	18.6531	5.17464	7.65202
						2010	9	10	253	36.6	22.2	29.4	80	27.7636	31.9836	16.8569	4.66645	6.99431
						2010	9	11	254	36	20.5	28.25	80.5	27.7174	34.3696	17.4598	4.7156	7.38255
						2010	9	12	255	34.4	20.5	27.45	80	31.4276	34.9475	18.7473	4.97537	7.42451
						2010	9	13	256	30	19.6	24.8	58	35.6149	29.6316	18.3767	4.59141	6.12753
						2010	9	14	257	33.2	18.8	26	35	32.8529	37.8465	19.9469	5.12409	9.53328
						2010	9	15	258	33.5	19.5	26.5	30	31.1263	34.8615	18.6342	4.84154	9.4045
						2010	9	16	259	33.3	19.8	26.55	22.5	31.58	34.1064	18.5652	4.82903	9.98681
						2010	9	17	260	32.7	19.2	25.95	19.5	31.3449	33.8525	18.427	4.72825	10.1373
						2010	9	18	261	34.1	17.9	26	16.5	28.3701	36.7676	18.27	4.69332	11.2946
						2010	9	19	262	35.7	21.9	28.8	30.5	27.7267	30.6103	16.48	4.50414	8.5223
						2010	9	20	263	35.7	22.4	29.05	34.5	29.9007	31.8143	17.4472	4.79407	8.46613
						2010	9	21	264	36.6	22.6	29.6	39.5	25.1361	28.1524	15.0481	4.18338	7.15537
						2010	9	22	265	33.1	25.9	29.5	44.5	35.8112	20.6273	15.3747	4.26515	5.03534
						2010	9	23	266	34.5	21.3	27.9	56.5	25.1735	26.5832	14.6336	3.92224	5.78076
						2010	9	24	267	36.6	22.6	29.6	76.5	28.577	32.0063	17.1081	4.75606	7.01497
						2010	9	25	268	27.4	20.7	24.05	63.5	16.8633	9.03871	6.98392	1.7142	2.12471
						2010	9	26	269	32	18.1	25.05	62	29.185	32.4537	17.4095	4.37528	6.69786
						2010	9	27	270	33.6	19.2	26.4	58	27.0602	31.1733	16.4298	4.25914	6.57553
						2010	9	28	271	30.9	19.2	25.05	37	27.8172	26.0369	15.2239	3.82601	6.4665
						2010	9	29	272	33.2	19.1	26.15	27.5	18.5028	20.8712	11.1165	2.86546	5.97725
						2010	9	30	273	32.4	20.7	26.55	44	26.7844	25.0702	14.6587	3.81291	5.84122
						2010	10	1	274	29.4	18.7	24.05	53	30.1681	25.8239	15.7892	3.87546	5.32937
						2010	10	2	275	29.3	17.6	23.45	53.5	29.7452	27.8415	16.2791	3.93841	5.65895
						2010	10	3	276	29.4	19.2	24.3	49	26.9165	21.9638	13.7543	3.39616	4.67649
						2010	10	4	277	29	16.9	22.95	54	28.1209	27.2211	15.651	3.74057	5.49495
						2010	10	5	278	27.3	16.8	22.05	75	27.9586	23.4852	14.4954	3.38787	4.71847
						2010	10	6	279	27.1	14.9	21	80	29.5788	28.8689	16.5303	3.76166	5.5984
						2010	10	7	280	27.8	14.3	21.05	65.5	24.0055	25.9259	14.1123	3.21556	5.07123
						2010	10	8	281	21.1	15	18.05	66.5	34.7106	16.9388	13.7166	2.88406	3.22165
						2010	10	9	282	21.1	11.4	16.25	61	28.5972	22.1914	14.2505	2.84586	3.91416
						2010	10	10	283	21.7	10.1	15.9	66	24.0644	22.3318	13.1137	2.59193	3.89563
						2010	10	11	284	22.6	12.6	17.6	71	26.5513	21.241	13.434	2.78918	3.90472
						2010	10	12	285	23.5	11.8	17.65	68.5	25.1549	23.5449	13.7669	2.86233	4.29591
						2010	10	13	286	25.8	14	19.9	72.5	24.1339	22.7824	13.2644	2.9329	4.3965
						2010	10	14	287	27.4	17.3	22.35	80.5	19.2681	15.5686	9.79758	2.30713	3.27571
						2010	10	15	288	25.5	18.1	21.8	76	19.5667	11.5835	8.51636	1.97796	2.51102
						2010	10	16	289	25.7	15.2	20.45	66	21.8533	18.3567	11.33	2.54173	3.65648
						2010	10	17	290	26.4	14.5	20.45	27.5	12.403	11.8077	6.84574	1.53575	3.28416
						2010	10	18	291	29	14.1	21.55	37.5	20.4805	24.4128	12.6489	2.91922	5.70911
						2010	10	19	292	29.3	18.7	24	42.5	20.4237	17.3193	10.6392	2.60827	4.09942
						2010	10	20	293	32.3	20.8	26.55	84	14.5383	13.3753	7.88831	2.05185	3.06346
						2010	10	21	294	27	18.1	22.55	73	25.8417	18.3993	12.3349	2.91909	3.81439
						2010	10	22	295	29.4	13.8	21.6	61.5	17.8492	22.2758	11.2798	2.60654	4.45774
						2010	10	23	296	26.3	15.3	20.8	45	23.0669	20.2989	12.2407	2.77116	4.32054
						2010	10	24	297	26.3	14.3	20.3	53	16.9518	16.2737	9.39563	2.09951	3.27373
						2010	10	25	298	24.8	14.8	19.8	54.5	10.5262	8.42093	5.32586	1.17448	1.85391
						2010	10	26	299	26.1	14.1	20.1	50.5	20.8951	20.0593	11.5812	2.57432	3.93197
						2010	10	27	300	27.5	14.9	21.2	40	8.53702	8.60532	4.84855	1.10903	2.21909
						2010	10	28	301	24.5	16.6	20.55	44	16.4236	10.3797	7.38587	1.66125	2.42608
						2010	10	29	302	22.8	11.7	17.25	46.5	4.1472	3.68272	2.21074	0.454457	1.00506
						2010	10	30	303	20.5	10.1	15.3	95	10.1757	8.46617	5.2505	1.01929	1.65241
						2010	10	31	304	19.5	9.2	14.35	58.5	7.09388	5.84535	3.64269	0.686865	1.20274
						2010	11	1	305	21.4	9	15.2	46	8.12626	8.06125	4.57848	0.886143	1.67437
						2010	11	2	306	23	9.9	16.45	57	18.0031	18.8672	10.4256	2.09426	3.39814
						2010	11	3	307	23.9	10.3	17.1	64.5	9.5796	10.4226	5.65245	1.15699	2.06633
						2010	11	4	308	23.1	11.6	17.35	55.5	5.88016	5.40975	3.19049	0.657735	1.24691
						2010	11	5	309	25.5	10	17.75	79	9.7709	12.1159	6.15489	1.2833	2.38681
						2010	11	6	310	27.1	12.2	19.65	67.5	6.72175	8.01233	4.15141	0.911833	1.776
						2010	11	7	311	24.9	12.2	18.55	75	17.0067	17.2788	9.69709	2.06735	3.31983
						2010	11	8	312	23	12	17.5	82.5	21.4928	18.9137	11.4054	2.36131	3.506
						2010	11	9	313	24	15.3	19.65	91	24.5933	17.1169	11.6064	2.54927	3.37659
						2010	11	10	314	26	16.1	21.05	70	22.7552	18.0222	11.4556	2.61023	3.64055
						2010	11	11	315	28.2	14.1	21.15	75	18.3983	20.7533	11.0537	2.52512	4.14307
						2010	11	12	316	27.2	14.2	20.7	49	17.5932	18.2969	10.1493	2.29173	3.71685
						2010	11	13	317	26	15	20.5	68	20.4987	18.0388	10.8778	2.44348	3.60334
						2010	11	14	318	26.6	17.9	22.25	71.5	14.2396	9.91078	6.72013	1.57851	2.22216
						2010	11	15	319	28	15.4	21.7	70	18.3126	18.4591	10.4005	2.40946	3.76658
						2010	11	16	320	25.1	16	20.55	70.5	20.0389	14.5883	9.67197	2.17545	2.98873
						2010	11	17	321	24	15.3	19.65	66	22.4108	15.5979	10.5764	2.32304	3.10955
						2010	11	18	322	23	15.8	19.4	63	24.9859	14.3919	10.7271	2.34042	2.88146
						2010	11	19	323	26.5	14.6	20.55	84	19.3442	18.4156	10.6768	2.40147	3.67457
						2010	11	20	324	27.4	13.3	20.35	74	17.0393	19.2204	10.2372	2.29057	3.80301
						2010	11	21	325	25.4	12.2	18.8	71	16.7679	17.7069	9.74734	2.09235	3.4135
						2010	11	22	326	23.5	11.5	17.5	56.5	16.9065	16.2302	9.37051	1.94002	3.05806
						2010	11	23	327	20.1	9.5	14.8	30.5	18.9769	16.0924	9.88551	1.8901	3.57919
						2010	11	24	328	18.9	9.7	14.3	33	19.1015	14.0587	9.27002	1.74523	3.03661
						2010	11	25	329	18.4	11.3	14.85	41.5	21.6257	12.2834	9.21977	1.76552	2.48585
						2010	11	26	330	19.7	10.3	15	33	19.102	14.3647	9.37051	1.80262	3.16988
						2010	11	27	331	21.8	10.4	16.1	38.5	17.3922	15.8616	9.39563	1.86807	3.35422
						2010	11	28	332	22	10.9	16.45	65.5	17.013	15.1075	9.06904	1.82176	2.78851
						2010	11	29	333	23.7	10.5	17.1	36.5	15.6875	16.566	9.11929	1.86661	3.67502
						2010	11	30	334	23.7	11.7	17.7	43	17.541	16.8394	9.72221	2.02424	3.49394
						2010	12	1	335	23	11.1	17.05	34	18.0697	17.2024	9.97343	2.03852	3.9088
						2010	12	2	336	22.6	10.4	16.5	36.5	16.6324	16.2333	9.29514	1.8699	3.54917
						2010	12	3	337	24.6	12.4	18.5	39	16.8572	16.4526	9.42075	2.00567	3.67322
						2010	12	4	338	25	14.4	19.7	59	12.5629	10.6533	6.54428	1.43933	2.24275
						2010	12	5	339	23.3	13.6	18.45	80.5	17.7456	13.7706	8.84294	1.88007	2.71195
						2010	12	6	340	17.4	9.9	13.65	68	17.8019	10.6811	7.80038	1.43881	1.88625
						2010	12	7	341	16.6	6.6	11.6	76.5	15.8885	12.7108	8.03904	1.38618	2.0009
						2010	12	8	342	17.6	7.6	12.6	61	17.4029	13.9223	8.80526	1.56994	2.26609
						2010	12	9	343	17.7	7.6	12.65	68	16.9213	13.6724	8.60428	1.53663	2.23553
						2010	12	10	344	13.9	8.1	11	75.5	22.5904	10.4819	8.70477	1.47034	1.64886
						2010	12	11	345	12	6.5	9.25	66.5	23.7004	10.4282	8.89319	1.41089	1.48024
						2010	12	12	346	8	4.4	6.2	74.5	16.8816	4.8619	5.12489	0.721379	0.630261
						2010	12	13	347	9.4	2.6	6	71.5	20.3816	11.0876	8.5038	1.18702	1.16716
						2010	12	14	348	7.1	3.8	5.45	74	26.0594	6.87968	7.57428	1.03284	0.741041
						2010	12	15	349	10	4.7	7.35	77	26.0872	11.061	9.60916	1.4174	1.34069
						2010	12	16	350	9.6	5.4	7.5	68	29.1134	9.78211	9.54636	1.41653	1.22678
						2010	12	17	351	8.2	4.9	6.55	32.5	31.0725	8.20314	9.03136	1.28979	1.21231
						2010	12	18	352	12.7	5.7	9.2	42	20.1328	11.2744	8.52264	1.3496	1.75501
						2010	12	19	353	11.1	7.4	9.25	20.5	26.039	7.70754	8.01392	1.27139	1.64677
						2010	12	20	354	13.4	6.5	9.95	37	18.5896	10.2615	7.81294	1.27159	1.81056
						2010	12	21	355	13.7	7.4	10.55	33	17.4216	8.78051	6.99648	1.16332	1.7294
						2010	12	22	356	14.2	7.1	10.65	36	16.3814	9.30461	6.98392	1.16533	1.75997
						2010	12	23	357	15.8	6.3	11.05	37.5	17.5494	13.3375	8.65453	1.46439	2.39094
						2010	12	24	358	16.3	4.7	10.5	39.5	16.4348	15.2515	8.95599	1.48651	2.54563
						2010	12	25	359	16.5	5	10.75	40	9.00544	8.285	4.88623	0.818178	1.53452
						2010	12	26	360	14.3	5.9	10.1	39	2.84416	1.91127	1.3189	0.215817	0.577557
						2010	12	27	361	15.5	6.2	10.85	34	15.2915	11.3769	7.46123	1.25373	2.15277
						2010	12	28	362	16	8	12	40	20.6506	13.2164	9.34538	1.63336	2.41015
						2010	12	29	363	15.1	9	12.05	36	23.045	11.246	9.10672	1.59432	2.20998
						2010	12	30	364	11	5.1	8.05	28.5	22.0749	10.4194	8.57916	1.30069	1.77029
						2010	12	31	365	7.6	2.9	5.25	37	26.2901	9.88507	9.11929	1.23282	1.14118
																	1188.48	1876.95
																	ETo-HS	ETo-TURC (Ousman Couly (2016)

## Sheet: 2011
	KİLİS					year	month	day	DOY	Tmax	Tmin	Tmean	RHmean	Ra	Rs=0.16(Tmax-Tmin)^0.5*Ra	Rs=from meteorological station	ETo-HS	ETo-TURC (Ousman Couly (2016)
	DOY	246					#	#		°C	°C	°C	%	MJ m-2 day-1*(0.408 mm day-1)
	φ (-)	36.71	0.64071			2011	1	1	1	11.9	2.5	7.2	67	20.7254	15.5855	10.1669	1.49072	1.77711
	tan(φ)		0.745649			2011	1	2	2	7.8	4.3	6.05	83	23.2477	6.50936	6.95879	0.973398	0.76618
	sin(φ)		0.597765			2011	1	3	3	7	5.6	6.3	83	11.1711	1.25116	2.11485	0.298927	0.306352
	cos(φ)		0.801671			2011	1	4	4	6.8	4.4	5.6	76	4.18242	0.803025	1.0367	0.142278	0.243801
	dr	0.984766		(1+0.033*cos(2*3.14/365*DOY))		2011	1	5	5	8.2	4.6	6.4	81.5	12.4971	3.59915	3.79384	0.538471	0.527443
	δ	0.120494		(0.409*sin(2*3.14/365*DOY-1.39))		2011	1	6	6	8.5	5.3	6.9	91	4.82018	1.23397	1.37962	0.199859	0.324656
	tan(δ)	0.121081				2011	1	7	7	8.9	6.6	7.75	56	24.0002	4.41604	5.8237	0.872686	0.687066
	sin(δ)	0.120203				2011	1	8	8	9.3	4.4	6.85	71	31.5407	12.3639	11.1709	1.615	1.40471
	cos(δ)	0.992749				2011	1	9	9	13.1	4.9	9	80.5	23.3526	15.3193	10.6995	1.68176	2.02383
	X	0.991849				2011	1	10	10	12.6	3	7.8	72.5	23.4366	17.9993	11.6185	1.74445	2.13052		-
	ωs (eq. 25)	1.49314		(acos{(-1*tan(-0.35)*tan(0.409*sin(2*3.14/365*DOY-1.39))))		2011	1	11	11	11	2.7	6.85	56	24.6603	16.3744	11.3673	1.64339	1.79447
	sin ωs	0.996986				2011	1	12	12	9.8	2.6	6.2	58	25.7769	14.8475	11.0667	1.55774	1.53556
	sin φ*sin δ	-0.0718532		(sin(0.35)*sin(0.409*sin(2*3.14/365*DOY-1.39)))		2011	1	13	13	8.2	1.8	5	64	12.1471	6.21931	4.91679	0.657484	0.643971
	cos φ*cos δ	0.795859		(cos(0.35)*cos(0.409*sin(2*3.14/365*DOY-1.39))		2011	1	14	14	9.4	3.6	6.5	66	22.0612	10.2364	8.50087	1.21154	1.15524
	Gsc	0.082				2011	1	15	15	11.8	3	7.4	63	3.72443	2.622	1.76775	0.26127	0.482559
						2011	1	16	16	12.9	3.2	8.05	67.5	2.08881	1.62091	1.04089	0.157809	0.401761
	Ra	25.4105				2011	1	17	17	7.6	3.1	5.35	61.5	27.0666	9.74396	9.1867	1.24732	0.964453
						2011	1	18	18	12.5	3.5	8	66.5	27.4414	19.7578	13.1719	1.99313	2.35577
						2011	1	19	19	14.2	4.1	9.15	66	31.3378	25.3209	15.9349	2.5187	3.21951
						2011	1	20	20	14.6	2.8	8.7	76.5	13.8663	13.0898	7.62118	1.1845	1.72742
						2011	1	21	21	14	4.9	9.45	86.5	33.5049	24.3916	16.1715	2.58454	3.17291
						2011	1	22	22	13.3	4.8	9.05	74.5	36.7281	24.9751	17.1328	2.69799	3.15722
						2011	1	23	23	13.7	5.3	9.5	61	17.7945	11.9579	8.25174	1.32122	1.68862
						2011	1	24	24	11.3	5.8	8.55	58.5	4.46782	1.96584	1.67647	0.259087	0.456476
						2011	1	25	25	11.4	6.2	8.8	68.5	44.822	18.646	16.3536	2.55131	2.37679
						2011	1	26	26	9.4	4	6.7	65.5	30.3558	13.1137	11.2865	1.62178	1.45521
						2011	1	27	27	8	5.7	6.85	63	34.4655	6.34165	8.36311	1.20907	0.819432
						2011	1	28	28	10.1	3.7	6.9	67.5	20.3934	10.4414	8.25467	1.19582	1.22396
						2011	1	29	29	7.4	5.4	6.4	57	38.8124	6.20998	8.78223	1.24649	0.769493
						2011	1	30	30	12.1	6.6	9.35	54.5	53.0615	23.3471	19.9104	3.17043	3.0279
						2011	1	31	31	10.1	3.4	6.75	53.5	20.8354	11.1678	8.62899	1.24245	1.27549
						2011	2	1	32	7.6	-0.1	3.75	56.5	20.1173	12.3922	8.93171	1.12889	0.897899
						2011	2	2	33	7.6	-0.6	3.5	63	15.1882	9.96348	6.95879	0.869324	0.70692
						2011	2	3	34	8.6	-1.7	3.45	61	10.4484	8.60947	5.36522	0.668674	0.620221
						2011	2	4	35	6.1	2.3	4.2	54.5	62.827	19.0994	19.5956	2.52842	1.43691
						2011	2	5	36	8.5	0.6	4.55	54.5	50.8182	32.1171	22.8535	2.9957	2.46798
						2011	2	6	37	12.7	0.1	6.4	61	38.3488	38.6556	21.7799	3.09129	3.77753
						2011	2	7	38	12.2	0.4	6.3	55.5	29.9982	28.3183	16.4876	2.33046	2.78814
						2011	2	8	39	15.7	4.3	10	55.5	40.9622	37.3576	22.1287	3.60802	4.8915
						2011	2	9	40	14.8	4.4	9.6	56.5	47.6148	39.6155	24.5685	3.94818	5.04535
						2011	2	10	41	15.5	1.9	8.7	61	42.4575	46.1937	25.0521	3.89366	5.49457
						2011	2	11	42	11.1	2.5	6.8	86	52.0515	35.8114	24.4232	3.52375	3.66496
						2011	2	12	43	11.6	-1	5.3	79.5	34.9465	35.2261	19.8476	2.68899	3.02021
						2011	2	13	44	13.3	4	8.65	69	47.2534	35.1565	23.0566	3.57675	4.22311
						2011	2	14	45	8.8	4.4	6.6	60.5	57.1414	20.1138	19.1777	2.74445	2.10319
						2011	2	15	46	7.9	5.6	6.75	63	38.0476	7.00076	9.23233	1.32932	0.874594
						2011	2	16	47	10.5	4.6	7.55	54	39.0723	18.4421	15.185	2.25767	2.13106
						2011	2	17	48	9.9	5.6	7.75	52.5	58.2891	20.0514	19.3393	2.89801	2.33823
						2011	2	18	49	13.4	5.2	9.3	53	33.0897	21.7068	15.1607	2.40967	2.8233
						2011	2	19	50	12.9	8.1	10.5	55.5	5.81451	2.23277	2.03823	0.338305	0.551789
						2011	2	20	51	11	6	8.5	53.5	34.2103	13.6841	12.2394	1.88793	1.76871
						2011	2	21	52	14.9	5.3	10.1	60.5	24.5261	18.8361	12.1586	1.98956	2.61034
						2011	2	22	53	12.3	5.8	9.05	57.5	65.7906	34.2111	26.8374	4.22623	4.23463
						2011	2	23	54	15.7	9	12.35	58	61.5772	33.0054	25.5022	4.50954	4.91271
						2011	2	24	55	17.9	5	11.45	78	17.2313	17.7828	9.90226	1.69874	2.66686
						2011	2	25	56	14.8	10.1	12.45	85.5	56.6468	21.2992	19.6492	3.48608	3.28855
						2011	2	26	57	13.1	5.8	9.45	73	19.7632	11.5417	8.54357	1.36544	1.6333
						2011	2	27	58	14.2	3.7	8.95	57	21.7491	18.2692	11.276	1.76908	2.35852
						2011	2	28	59	12.5	6.5	9.5	55.5	34.6728	16.6429	13.5889	2.17578	2.25178
						2011	3	1	60	16.5	5.6	11.05	50	53.1037	46.3065	28.0516	4.74649	6.36399
						2011	3	2	61	17	7.4	12.2	51	54.7972	42.0842	27.1653	4.77973	6.14217
						2011	3	3	62	17	6	11.5	52.5	30.4908	26.8319	16.1802	2.78049	3.89081
						2011	3	4	63	17.7	4.8	11.25	51	29.5818	30.5284	16.9996	2.89637	4.33359
						2011	3	5	64	16.9	7.1	12	52	48.9914	38.4092	24.5388	4.28881	5.57989
						2011	3	6	65	13.6	7	10.3	48	58.271	30.7671	23.9522	3.94747	4.26523
						2011	3	7	66	14	8	11	44	53.1454	25.5098	20.8287	3.51821	3.93009
						2011	3	8	67	13.3	7.5	10.4	43.5	65.9424	30.5973	25.4096	4.20258	4.53423
						2011	3	9	68	9.9	4.3	7.1	46	57.4214	25.7248	21.7414	3.17508	2.92845
						2011	3	10	69	6.7	0.8	3.75	45	71.884	33.9293	27.9369	3.53097	2.39271
						2011	3	11	70	9.8	-0.2	4.8	55	28.4281	22.7425	14.3836	1.90653	1.8662
						2011	3	12	71	12.8	1.3	7.05	69	40.9288	37.6545	22.2074	3.23663	3.9393
						2011	3	13	72	16.1	4.5	10.3	58.5	28.6906	26.6249	15.6347	2.5767	3.62398
						2011	3	14	73	18.3	4.1	11.2	58	41.7203	47.3942	25.1542	4.27836	6.5576
						2011	3	15	74	17.9	5.5	11.7	62	24.2101	24.0164	13.6404	2.36003	3.54637
						2011	3	16	75	19.9	6.4	13.15	64	40.93	44.2044	24.0619	4.36775	6.70406
						2011	3	17	76	21.8	8	14.9	61	37.274	41.1505	22.1547	4.24895	6.67986
						2011	3	18	77	22.7	10.2	16.45	57	50.8929	50.8929	28.7894	5.78311	8.59099
						2011	3	19	78	21.5	13.6	17.55	77.5	65.3275	41.287	29.3785	6.09098	7.25015
						2011	3	20	79	18.1	10.6	14.35	76	67.2534	40.352	29.4689	5.55666	6.43282
						2011	3	21	80	18.7	11.4	15.05	78	65.0913	38.0133	28.1387	5.42136	6.22636
						2011	3	22	81	15.6	8.5	12.05	72	53.6882	30.4949	22.8891	4.0072	4.49985
						2011	3	23	82	15.7	5.8	10.75	68	45.8723	36.3308	23.0934	3.86689	4.97233
						2011	3	24	83	15.7	3.6	9.65	79.5	24.0374	23.2682	13.3783	2.15383	3.07745
						2011	3	25	84	18.1	7.6	12.85	76	38.9619	32.728	20.2002	3.63123	4.98017
						2011	3	26	85	20	6	13	82.5	44.3462	49.6677	26.5485	4.79578	7.44941
						2011	3	27	86	19.6	5.6	12.6	84.5	46.7199	52.3263	27.9696	4.98686	7.70109
						2011	3	28	87	18	6.8	12.4	79	45.4753	40.7459	24.3503	4.313	6.00953
						2011	3	29	88	20.6	8.1	14.35	80.5	53.2378	53.2378	30.1158	5.67863	8.38588
						2011	3	30	89	20.8	9.1	14.95	77.5	55.2473	51.7115	30.236	5.80769	8.32531
						2011	3	31	90	23.2	12	17.6	82	49.1505	44.0388	26.3182	5.46422	7.72021
						2011	4	1	91	24.6	16	20.3	86	50.489	34.7364	23.69	5.29369	6.56512
						2011	4	2	92	21.6	14.3	17.95	75.5	65.687	38.3612	28.3962	5.95394	6.83128
						2011	4	3	93	22.9	10.8	16.85	74.5	51.5167	49.8681	28.6722	5.82682	8.5213
						2011	4	4	94	18.3	10	14.15	77	62.7211	41.6468	28.9117	5.41766	6.58153
						2011	4	5	95	18.3	8	13.15	80	58.995	48.6118	30.2938	5.49898	7.34231
						2011	4	6	96	19	8.4	13.7	72.5	47.2559	40.073	24.6166	4.54786	6.23924
						2011	4	7	97	19	7.6	13.3	72.5	51.1115	46.6137	27.6116	5.0364	7.0956
						2011	4	8	98	19.3	8.1	13.7	63	41.1434	36.8645	22.0307	4.07012	5.76445
						2011	4	9	99	18.4	9.2	13.8	63.5	56.326	41.456	27.3352	5.06615	6.46839
						2011	4	10	100	16.9	11.4	14.15	61.5	73.4245	32.3068	27.5513	5.16275	5.17603
						2011	4	11	101	17.6	10.3	13.95	50.5	66.427	38.7933	28.7161	5.34734	6.10708
						2011	4	12	102	12.7	4.8	8.75	50	67.5965	42.721	30.3989	4.73358	5.11788
						2011	4	13	103	15.7	3	9.35	55.5	50.9855	51.8013	29.0716	4.62921	6.41495
						2011	4	14	104	17.7	5.9	11.8	68	53.3787	50.3895	29.3379	5.09318	7.16306
						2011	4	15	105	20.6	10	15.3	67	57.7804	48.9978	30.0991	5.84318	7.99701
						2011	4	16	106	20.9	8	14.45	80	53.7239	55.4431	30.8733	5.83956	8.75109
						2011	4	17	107	26.3	12.9	19.6	68.5	52.241	56.0023	30.5973	6.71156	10.2014
						2011	4	18	108	25	15.5	20.25	67.5	63.491	48.2532	31.3108	6.98742	8.96537
						2011	4	19	109	24.2	12	18.1	65.5	54.218	52.9168	30.3001	6.37978	9.32456
						2011	4	20	110	17.9	9	13.45	64.5	62.7595	44.6848	29.9567	5.49051	6.85509
						2011	4	21	111	19.5	7.2	13.35	71.5	53.7979	52.9372	30.1883	5.51524	8.0328
						2011	4	22	112	16.3	10.7	13.5	68.5	78.8989	35.3467	29.8734	5.484	5.49728
						2011	4	23	113	17	7.5	12.25	67.5	58.9751	44.8211	29.0837	5.12581	6.53742
						2011	4	24	114	20	9.2	14.6	81	54.7282	47.2852	28.7768	5.46835	7.54973
						2011	4	25	115	16	7.9	11.95	73.5	63.7105	41.2844	29.0117	5.06207	5.96217
						2011	4	26	116	20.4	8.6	14.5	60.5	54.171	51.1374	29.7733	5.64025	8.11041
						2011	4	27	117	22.8	10.5	16.65	55.5	48.3816	47.6075	27.1489	5.48542	8.10469
						2011	4	28	118	22.9	15.6	19.25	55	68.6972	40.1192	29.6976	6.45323	7.35426
						2011	4	29	119	22.4	13.5	17.95	57	61.3148	43.6561	29.2671	6.13655	7.72547
						2011	4	30	120	20.2	11.5	15.85	58	61.6624	42.9171	29.1005	5.74319	7.1683
						2011	5	1	121	22.2	10.6	16.4	52.5	52.9971	49.1813	28.8803	5.79289	8.30138
						2011	5	2	122	22.5	11.4	16.95	68.5	55.1138	48.9411	29.3793	5.98777	8.39258
						2011	5	3	123	24.2	13.8	19	62	55.1134	45.8544	28.4377	6.13776	8.30566
						2011	5	4	124	25.6	13.5	19.55	55.5	50.9118	49.2826	28.3355	6.20712	9.0114
						2011	5	5	125	23.9	14	18.95	52	57.8421	45.8109	29.1193	6.27634	8.28848
						2011	5	6	126	23.5	12.9	18.2	46.5	55.2975	46.8923	28.8057	6.08204	8.74025
						2011	5	7	127	22.5	12.4	17.45	50.5	54.0757	43.6932	27.4969	5.68474	7.63218
						2011	5	8	128	23.1	10.8	16.95	66.5	47.4623	46.7029	26.6331	5.42806	8.02449
						2011	5	9	129	25.5	11.1	18.3	58	46.685	53.7811	28.3452	6.00142	9.51823
						2011	5	10	130	27.8	14.4	21.1	55.5	44.8642	48.0944	26.2768	5.99501	9.09297
						2011	5	11	131	26.8	15.7	21.25	49	52.6145	46.7217	28.047	6.42356	8.99698
						2011	5	12	132	20.8	10.6	15.7	51.5	54.7793	44.6999	27.9922	5.49984	7.41781
						2011	5	13	133	18.9	10.4	14.65	57	58.9791	40.1058	27.5124	5.23613	6.46315
						2011	5	14	134	21.1	8.9	15	74.5	49.1204	47.9415	27.4512	5.28085	7.75488
						2011	5	15	135	20.5	10.5	15.5	80.5	54.7485	43.7988	27.7008	5.41009	7.22936
						2011	5	16	136	25.3	11.9	18.6	64	43.6453	46.7878	25.5629	5.45732	8.38777
						2011	5	17	137	27.6	14.2	20.9	60	45.9522	49.2608	26.914	6.10883	9.26746
						2011	5	18	138	26.3	17.8	22.05	69.5	57.7925	39.2989	26.9588	6.30083	7.636
						2011	5	19	139	27.1	16.4	21.75	54	51.7385	44.2882	27.0786	6.28117	8.50898
						2011	5	20	140	26.5	14.2	20.35	43.5	47.8891	47.1229	26.8726	6.01273	9.59796
						2011	5	21	141	24.3	13.8	19.05	43	56.3606	47.3429	29.2207	6.31532	9.43079
						2011	5	22	142	27.4	15.3	21.35	48.5	51.066	49.4319	28.4214	6.52596	9.58198
						2011	5	23	143	29	14.3	21.65	47.5	44.5326	52.3704	27.3185	6.3208	10.3292
						2011	5	24	144	29.9	16.5	23.2	56.5	46.5591	49.9114	27.2695	6.55736	9.79042
						2011	5	25	145	30.4	19.3	24.85	48.5	51.5274	45.7564	27.4676	6.8708	9.4475
						2011	5	26	146	31	18.5	24.75	43.5	48.5037	48.5037	27.4378	6.84727	10.6723
						2011	5	27	147	30.3	17	23.65	46.5	43.4962	46.28	25.3803	6.17007	9.63404
						2011	5	28	148	24	16.6	20.3	47	59.3072	35.1098	25.8133	5.76814	6.9159
						2011	5	29	149	26.9	16.1	21.5	42.5	47.7129	41.2239	25.0881	5.78267	8.75666
						2011	5	30	150	28.4	15.2	21.8	44.5	42.5846	44.9693	24.7548	5.7494	9.32105
						2011	5	31	151	31.7	14.3	23	48.5	38.7061	53.8789	25.833	6.18162	10.7266
						2011	6	1	152	30.7	17.7	24.2	57.5	45.8794	47.7146	26.4673	6.51969	9.53148
						2011	6	2	153	29.4	15.7	22.55	60.5	45.4364	49.7983	26.9082	6.36789	9.65979
						2011	6	3	154	30.6	17.6	24.1	53.5	47.0058	48.8861	27.1171	6.66385	9.74021
						2011	6	4	155	32.2	19.2	25.7	43.5	47.4464	49.3442	27.3713	6.98316	11.0031
						2011	6	5	156	32.2	19	25.6	47.5	46.487	49.0903	27.0233	6.87854	10.3614
						2011	6	6	157	32.5	17.8	25.15	47.5	43.1942	50.7963	26.4974	6.67475	10.6365
						2011	6	7	158	33.7	20	26.85	41	44.4607	48.729	26.3304	6.89519	11.4068
						2011	6	8	159	34.9	21.8	28.35	43	42.0925	44.1129	24.3759	6.59781	10.3036
						2011	6	9	160	35.2	20.6	27.9	40.5	40.2236	46.9812	24.5911	6.59116	11.2358
						2011	6	10	161	34.3	21.2	27.75	34.5	35.983	37.7102	20.8379	5.56685	9.78232
						2011	6	11	162	28	18.4	23.2	33.5	48.1663	36.9917	23.878	5.74183	9.09239
						2011	6	12	163	28.1	17.4	22.75	42	48.4913	41.5086	25.3791	6.0358	9.07601
						2011	6	13	164	27	16.7	21.85	37.5	51.1199	42.1228	26.25	6.10436	9.57811
						2011	6	14	165	26.5	15.9	21.2	39	49.1013	41.6379	25.578	5.85058	9.18617
						2011	6	15	166	30.6	15.9	23.25	40	28.2446	33.2157	17.3266	4.17153	7.60308
						2011	6	16	167	31.7	17.8	24.75	39	41.9694	46.67	25.0357	6.24781	10.8906
						2011	6	17	168	31.7	17	24.35	39	41.565	48.8804	25.498	6.30335	11.3141
						2011	6	18	169	30.3	16.8	23.55	40.5	45.5488	49.1927	26.7771	6.49393	11.0298
						2011	6	19	170	32.3	19.1	25.7	40	46.2004	48.7876	26.8567	6.85188	11.382
						2011	6	20	171	34.1	18.5	26.3	40.5	41.5143	51.8098	26.2349	6.78557	12.0844
						2011	6	21	172	36.7	21.9	29.3	40	42.4786	50.2947	26.147	7.22288	12.275
						2011	6	22	173	36.7	23.5	30.1	39	44.7872	47.2953	26.0352	7.31416	11.8232
						2011	6	23	174	37.2	23.2	30.2	41.5	40.2184	45.0446	24.0773	6.77825	10.9482
						2011	6	24	175	36.9	21.6	29.25	39	40.7993	49.9384	25.534	7.04606	12.3368
						2011	6	25	176	36.7	23.1	29.9	35.5	41.5861	45.2457	24.5379	6.86474	11.796
						2011	6	26	177	33.6	19.7	26.65	36	39.3864	43.7977	23.4949	6.12511	10.9225
						2011	6	27	178	31.2	18	24.6	34	42.0069	44.3593	24.419	6.07242	10.9896
						2011	6	28	179	29.8	19	24.4	36	45.3376	39.1716	23.8391	5.90025	9.50568
						2011	6	29	180	29.5	17.9	23.7	33	43.8315	40.6757	23.8856	5.81369	10.0906
						2011	6	30	181	30.5	16.1	23.3	32.5	39.3545	45.3364	23.8944	5.75977	11.1802
						2011	7	1	182	32.1	19.6	25.85	32.5	41.4632	41.4632	23.4552	6.00469	10.6797
						2011	7	2	183	33.4	19.7	26.55	34.5	40.7695	44.6833	24.1443	6.28025	11.3167
						2011	7	3	184	34.4	20.4	27.4	36.5	40.2198	45.0462	24.0782	6.38308	11.2639
						2011	7	4	185	35.1	20.6	27.85	31.5	38.864	45.0822	23.6783	6.33957	12.0162
						2011	7	5	186	36.1	20.7	28.4	32.5	35.9261	44.2609	22.5575	6.11224	11.7533
						2011	7	6	187	35.8	19.8	27.8	33	35.229	45.0932	22.5466	6.02995	11.8079
						2011	7	7	188	34.2	19	26.6	29.5	36.4181	44.2844	22.7174	5.91575	11.8844
						2011	7	8	189	36.5	18.3	27.4	33.5	35.2585	51.3364	24.0669	6.38008	13.2258
						2011	7	9	190	37.2	23.2	30.2	37.5	40.1918	45.0148	24.0614	6.77377	11.4988
						2011	7	10	191	37.7	26	31.85	42.5	42.3815	39.6691	23.1947	6.75424	9.74353
						2011	7	11	192	36.5	22.8	29.65	50	36.9198	40.4641	21.8645	6.08477	8.76005
						2011	7	12	193	36.7	21.7	29.2	39	35.7601	42.9121	22.1597	6.10843	10.6645
						2011	7	13	194	36.5	22.8	29.65	38	36.2065	39.6823	21.442	5.9672	10.0732
						2011	7	14	195	35.7	21.3	28.5	40.5	36.0858	41.5708	21.9097	5.94958	10.0711
						2011	7	15	196	36.8	21.3	29.05	40	35.0104	43.4129	22.0538	6.05983	10.6315
						2011	7	16	197	34.6	23.8	29.2	36	40.9763	35.4035	21.5459	5.93923	9.21424
						2011	7	17	198	36	23	29.5	33.5	35.8976	37.3335	20.7089	5.74495	10.0115
						2011	7	18	199	36.5	24.2	30.35	33.5	21.3938	21.0515	12.005	3.3902	5.93271
						2011	7	19	200	37.8	21.4	29.6	35	27.4851	36.0604	17.809	4.95092	9.53101
						2011	7	20	201	35.9	23.3	29.6	34.5	34.5248	34.801	19.6081	5.45108	9.27058
						2011	7	21	202	35.9	23.4	29.65	36	31.9174	31.9174	18.0552	5.02465	8.40077
						2011	7	22	203	36.5	22	29.25	33	21.684	25.1535	13.2112	3.64562	6.93837
						2011	7	23	204	36.5	20.8	28.65	36	29.7779	37.401	18.8783	5.14301	9.64233
						2011	7	24	205	36.5	24.6	30.55	41	39.6783	37.7737	21.9001	6.21027	9.35387
						2011	7	25	206	36.5	21.9	29.2	34	34.2975	40.0595	20.9681	5.77996	10.6051
						2011	7	26	207	36.5	22.9	29.7	34	35.419	38.5358	20.899	5.8222	10.2805
						2011	7	27	208	37	20.5	28.75	38.5	31.4088	41.4596	20.4133	5.57315	10.3292
						2011	7	28	209	38.8	23.7	31.25	32	31.316	37.8297	19.4704	5.60121	10.5117
						2011	7	29	210	38	22.1	30.05	28.5	25.0493	31.8627	15.9814	4.48501	9.17716
						2011	7	30	211	36.8	25	30.9	34.5	26.8185	25.3166	14.7399	4.2101	6.98604
						2011	7	31	212	37.1	23.3	30.2	27.5	32.8522	36.2689	19.5265	5.4971	10.4988
						2011	8	1	213	38.6	22.6	30.6	33	29.343	37.5591	18.7795	5.33087	10.2511
						2011	8	2	214	38.6	22.4	30.5	36.5	20.3301	26.3478	13.0923	3.70879	7.04912
						2011	8	3	215	38.6	20.6	29.6	40.5	21.6905	31.2343	14.724	4.09329	7.78662
						2011	8	4	216	38.6	21.7	30.15	63.5	23.5744	31.8726	15.5061	4.36074	7.03059
						2011	8	5	217	38.6	22.5	30.55	43	20.3814	26.2512	13.0848	3.71049	6.48181
						2011	8	6	218	38.6	24.4	31.5	48	27.1327	30.8228	16.359	4.73012	7.10916
						2011	8	7	219	38.6	23.7	31.15	38	2.90496	3.46272	1.79413	0.51508	1.36104
						2011	8	8	220	38.6	23.4	31	40	9.37149	11.3957	5.84589	1.67316	3.21982
						2011	8	9	221	38.6	23.6	31.1	56	12.6689	15.2027	7.85062	2.25155	3.61646
						2011	8	10	222	38.6	24	31.3	49	23.7272	27.7134	14.5059	4.17727	6.33507
						2011	8	11	223	35.5	22.5	29	38	27.5909	28.6946	15.9169	4.3689	7.36811
						2011	8	12	224	33	21.6	27.3	29	11.549	10.5327	6.23905	1.6503	3.28307
						2011	8	13	225	33.6	19.5	26.55	30	12.3742	13.9581	7.43444	1.93379	4.08719
						2011	8	14	226	34.1	21.3	27.7	33	5.50115	5.63318	3.14904	0.840346	1.93033
						2011	8	15	227	34.8	21.7	28.25	41.5	3.87753	4.06365	2.24549	0.606469	1.39733
						2011	8	16	228	34.6	21.6	28.1	47	11.3078	11.7601	6.52335	1.75611	2.91924
						2011	8	17	229	38.6	22.5	30.55	52.5	18.6975	24.0823	12.0037	3.40393	5.4416
						2011	8	18	230	36.5	23	29.75	48.5	3.34959	3.61755	1.96915	0.549157	1.20147
						2011	8	19	231	35.3	22.5	28.9	51	7.10081	7.27123	4.06474	1.11331	1.91042
						2011	8	20	232	36.6	20.8	28.7	54	9.25635	11.7	5.88692	1.6055	2.80755
						2011	8	21	233	38.6	23.2	30.9	53.5	16.4083	20.215	10.3025	2.94267	4.6549
						2011	8	22	234	38.6	25	31.8	50.5	7.12083	7.74747	4.20165	1.22228	2.07217
						2011	8	23	235	38.6	22	30.3	50.5	15.0873	20.036	9.83526	2.77459	4.58784
						2011	8	24	236	38.6	23.2	30.9	47.5	12.4159	15.2964	7.79578	2.22667	3.75801
						2011	8	25	237	36.1	22.9	29.5	36	11.999	12.6709	6.97512	1.935	3.64015
						2011	8	26	238	38.6	22	30.3	42	9.07037	12.0455	5.91288	1.66806	3.26597
						2011	8	27	239	38.6	22.4	30.5	39	3.8607	5.00346	2.48624	0.704301	1.70567
						2011	8	28	240	36.1	21.7	28.9	40.5	5.05482	5.82315	3.06907	0.840605	1.83406
						2011	8	29	241	38.6	21.8	30.2	47	17.0518	22.9176	11.1826	3.14814	5.40166
						2011	8	30	242	34.1	20.5	27.3	47.5	15.9937	17.4011	9.43708	2.49622	4.03888
						2011	8	31	243	33.1	19.8	26.45	48.5	5.79715	6.16817	3.38268	0.877894	1.66861
						2011	9	1	244	35.8	21.9	28.85	58.5	34.723	38.612	20.7131	5.66715	8.30144
						2011	9	2	245	34.5	21.9	28.2	56	35.4308	35.7143	20.1227	5.42891	7.65012
						2011	9	3	246	34.2	20.4	27.3	51.5	32.1858	35.5331	19.1304	5.06021	7.5273
						2011	9	4	247	35.1	21.4	28.25	54	31.5607	34.5905	18.6908	5.04806	7.42728
						2011	9	5	248	36.8	23.5	30.15	61	33.3234	35.4561	19.4444	5.46829	7.77242
						2011	9	6	249	35.8	22.5	29.15	59	31.1707	33.1657	18.1883	5.00837	7.21603
						2011	9	7	250	34	22.4	28.2	61.5	35.4397	32.8881	19.3125	5.21033	7.0782
						2011	9	8	251	33.4	19.4	26.4	57	30.5913	34.2622	18.3139	4.74758	7.18615
						2011	9	9	252	32.8	19.5	26.15	56	35.0455	37.2885	20.4493	5.27115	7.75751
						2011	9	10	253	35.6	20.5	28.05	58.5	31.9712	38.6213	19.8778	5.34534	8.22311
						2011	9	11	254	35.2	19.4	27.3	58.5	29.3688	37.1222	18.6782	4.9406	7.84522
						2011	9	12	255	35.5	21.1	28.3	59	34.6528	39.92	21.0397	5.68863	8.51163
						2011	9	13	256	35.2	20.6	27.9	60.5	34.3119	40.0763	20.9769	5.62244	8.50107
						2011	9	14	257	34.8	21.1	27.95	48	34.4877	37.7985	20.4242	5.48029	8.27681
						2011	9	15	258	34.2	20.2	27.2	51.5	34.1162	38.2102	20.4242	5.39045	8.05239
						2011	9	16	259	35.2	21.2	28.2	55	33.3189	37.3172	19.9469	5.38147	7.97448
						2011	9	17	260	35	20.7	27.85	52	33.7772	38.6411	20.4367	5.47168	8.20659
						2011	9	18	261	35	19.9	27.45	54.5	29.9004	36.1197	18.5903	4.9337	7.6595
						2011	9	19	262	32.3	19.9	26.1	47	32.0146	31.7585	18.0376	4.6442	6.94903
						2011	9	20	263	32.8	19.7	26.25	46	30.9306	32.4153	17.912	4.62762	7.19591
						2011	9	21	264	33.2	21.3	27.25	52.5	32.8168	31.2416	18.113	4.78578	6.66434
						2011	9	22	265	31.9	19.3	25.6	48.5	31.3171	31.5677	17.7864	4.52736	6.71998
						2011	9	23	266	28.7	19.4	24.05	48.5	39.0782	29.0742	19.0676	4.68015	6.07742
						2011	9	24	267	28.3	17.3	22.8	53.5	33.8489	29.787	17.9622	4.27715	5.96049
						2011	9	25	268	30.4	18.2	24.3	54.5	29.6574	28.9457	16.5742	4.09245	5.9489
						2011	9	26	269	29.9	14.7	22.3	48	27.0634	32.909	16.882	3.97041	6.67188
						2011	9	27	270	30	20.1	25.05	48	35.0186	27.7347	17.6294	4.43053	5.9481
						2011	9	28	271	30.8	18.4	24.6	49	31.4795	31.2277	17.7361	4.41055	6.50784
						2011	9	29	272	29.9	19.5	24.7	50.5	32.4259	26.9783	16.7313	4.17047	5.60645
						2011	9	30	273	26.2	18.3	22.25	44	36.9251	23.3367	16.6056	3.90055	5.11176
						2011	10	1	274	23.7	12.7	18.2	45	32.1446	28.2872	17.0578	3.60159	5.53103
						2011	10	2	275	25	12.1	18.55	57	30.3825	31.3548	17.4598	3.7223	5.73247
						2011	10	3	276	26.6	15.1	20.85	72	26.1366	24.0457	14.1814	3.21466	4.71208
						2011	10	4	277	26.4	13.7	20.05	66	24.8491	25.2467	14.1688	3.14534	4.84769
						2011	10	5	278	27.8	13.9	20.85	56	27.332	30.3932	16.3042	3.69587	5.85649
						2011	10	6	279	29.4	16.1	22.75	58	21.4406	22.8128	12.5108	2.97538	4.65238
						2011	10	7	280	28.2	14.2	21.2	57.5	26.7936	30.0088	16.0404	3.669	5.82745
						2011	10	8	281	26.5	15.6	21.05	57	24.2544	21.1499	12.8122	2.91933	4.20671
						2011	10	9	282	27	15.4	21.2	53.5	29.3429	27.2302	15.9902	3.65751	5.323
						2011	10	10	283	30.5	17.4	23.95	57.5	27.0697	28.369	15.6761	3.83852	5.80598
						2011	10	11	284	32.5	21.7	27.1	55	28.4037	24.5408	14.935	3.93297	5.31413
						2011	10	12	285	26.3	16.6	21.45	53	22.6862	17.6045	11.3049	2.6024	3.59282
						2011	10	13	286	24.7	12.1	18.4	49	21.3204	21.491	12.1088	2.57086	4.08466
						2011	10	14	287	25.2	12.1	18.65	51	24.8789	26.0731	14.4075	3.08002	4.83879
						2011	10	15	288	26.2	16.7	21.45	57.5	27.1009	20.5967	13.3649	3.07662	4.13869
						2011	10	16	289	24.7	15.5	20.1	74	25.391	18.6878	12.3223	2.73905	3.6885
						2011	10	17	290	25	13.1	19.05	63.5	24.0323	22.8787	13.2644	2.86678	4.33048
						2011	10	18	291	20.1	13.6	16.85	62.5	32.2091	16.7488	13.1388	2.6701	3.08962
						2011	10	19	292	20.3	12.2	16.25	64	29.9565	19.4118	13.6412	2.7242	3.4661
						2011	10	20	293	19.8	7.8	13.8	61	25.2917	24.28	14.0181	2.59803	3.91705
						2011	10	21	294	21.8	8.8	15.3	72	13.4453	13.9831	7.75642	1.50576	2.51599
						2011	10	22	295	23.6	10.7	17.15	59	20.0875	20.7303	11.5436	2.36622	3.77368
						2011	10	23	296	25.2	12.6	18.9	67	24.1514	24.3446	13.7166	2.95244	4.56874
						2011	10	24	297	22.7	12.1	17.4	73	24.7641	20.9999	12.9001	2.66321	3.84404
						2011	10	25	298	24.3	14.2	19.25	73.5	25.1473	20.319	12.7871	2.77861	3.9044
						2011	10	26	299	24.9	13.1	19	60	22.6712	21.4016	12.4605	2.68938	4.06958
						2011	10	27	300	22.2	12.2	17.2	67	10.2779	8.22232	5.20025	1.06748	1.70762
						2011	10	28	301	17.8	9.5	13.65	67	23.0262	15.2894	10.614	1.95781	2.56687
						2011	10	29	302	21	11.4	16.2	65	8.5135	6.53836	4.2205	0.841609	1.38883
						2011	10	30	303	20.2	10.9	15.55	60.5	20.6461	15.3607	10.0739	1.97044	2.75355
						2011	10	31	304	20.3	10.4	15.35	65.5	23.2792	18.4371	11.7194	2.27854	3.2184
						2011	11	1	305	20.7	8.5	14.6	57.5	30.5228	29.7902	17.0578	3.24143	4.87466
						2011	11	2	306	19.9	8.6	14.25	60.5	19.6175	17.7342	10.5512	1.98335	2.99397
						2011	11	3	307	14.5	8	11.25	64.5	29.0375	15.0995	11.845	2.01813	2.28375
						2011	11	4	308	12	7	9.5	60	24.7519	9.90076	8.8555	1.41789	1.44134
						2011	11	5	309	11	4.8	7.9	84.5	27.903	13.8399	11.1165	1.67559	1.7036
						2011	11	6	310	17.7	5.5	11.6	74	1.84305	1.79882	1.03	0.177604	0.525722
						2011	11	7	311	17.5	7.8	12.65	69	7.56205	5.86815	3.7683	0.672978	1.12868
						2011	11	8	312	15.6	4.6	10.1	72	14.0366	12.3522	7.44867	1.21885	1.80154
						2011	11	9	313	15.8	4	9.9	71.5	11.9298	11.2617	6.55684	1.06523	1.64564
						2011	11	10	314	14.5	4.8	9.65	75.5	16.4349	12.7534	8.18977	1.31851	1.80139
						2011	11	11	315	10.7	5.9	8.3	89.5	23.5065	9.02649	8.24002	1.26135	1.22758
						2011	11	12	316	13.2	4.7	8.95	83.5	23.2653	15.8204	10.8527	1.70267	2.07484
						2011	11	13	317	10.6	1.8	6.2	72	23.2093	16.3394	11.016	1.55061	1.67081
						2011	11	14	318	11.4	7.1	9.25	72	31.0444	10.6793	10.3	1.63408	1.50994
						2011	11	15	319	12.2	8.5	10.35	68.5	13.9582	4.13163	4.29586	0.709246	0.787459
						2011	11	16	320	10.5	8.3	9.4	69	36.4151	6.40906	8.64197	1.37864	1.01501
						2011	11	17	321	10.7	6.8	8.75	62	7.35434	2.29455	2.32378	0.36185	0.500762
						2011	11	18	322	10.4	7.9	9.15	65	33.8625	6.77249	8.5666	1.35405	1.04093
						2011	11	19	323	10.2	8	9.1	66.5	48.2712	8.49572	11.4556	1.80734	1.2391
						2011	11	20	324	14.3	8.5	11.4	65.5	20.5693	9.54416	7.92599	1.35739	1.55739
						2011	11	21	325	16.5	7.4	11.95	69	1.87377	1.3641	0.904392	0.157802	0.474795
						2011	11	22	326	15.6	5.8	10.7	68.5	16.2003	12.7011	8.11441	1.35634	1.90902
						2011	11	23	327	15.4	7	11.2	67.5	24.6494	16.5644	11.4305	1.94416	2.47206
						2011	11	24	328	13.9	3.6	8.75	89	22.0155	18.1408	11.3049	1.76035	2.31057
						2011	11	25	329	11.5	1.9	6.7	68.5	3.64864	2.80216	1.80878	0.259909	0.468249
						2011	11	26	330	11.3	1.3	6.3	70	10.0296	8.02372	5.07464	0.717283	0.927328
						2011	11	27	331	11.8	0.4	6.1	76.5	16.3923	14.9498	8.8555	1.24131	1.52712
						2011	11	28	332	10.7	2	6.35	76.5	22.3575	15.5608	10.5512	1.49447	1.62743
						2011	11	29	333	13.3	2	7.65	75	18.6834	16.8898	10.0488	1.49993	1.98722
						2011	11	30	334	12.8	2.3	7.55	80.5	17.8315	14.9784	9.2449	1.37451	1.77156
						2011	12	1	335	12.5	2.4	7.45	75	15.9085	12.8541	8.08928	1.19795	1.53734
						2011	12	2	336	11.8	2.2	7	75.5	20.1689	15.4897	9.99856	1.45431	1.734
						2011	12	3	337	13.3	3.1	8.2	75.5	17.4281	14.2213	8.90575	1.35804	1.78722
						2011	12	4	338	14.4	1.3	7.85	70	15.0966	15.8212	8.74246	1.31519	1.90752
						2011	12	5	339	15.3	2.6	8.95	74.5	16.0154	16.2716	9.13185	1.43268	2.12711
						2011	12	6	340	14.2	3	8.6	83.5	8.44496	7.56669	4.52196	0.700162	1.09088
						2011	12	7	341	12.6	2.3	7.45	86	14.9216	12.2954	7.66221	1.13471	1.47987
						2011	12	8	342	9.5	4.7	7.1	91.5	17.9882	6.90746	6.30562	0.920864	0.896082
						2011	12	9	343	8.6	2.7	5.65	92.5	23.6586	11.1669	9.19465	1.26458	1.12443
						2011	12	10	344	11.5	1.8	6.65	93	18.8043	14.5921	9.37051	1.34372	1.58846
						2011	12	11	345	11	1.4	6.2	71	19.1554	14.7113	9.49612	1.33667	1.52321
						2011	12	12	346	12.7	2.2	7.45	67.5	19.4305	16.3216	10.0739	1.49186	1.89406
						2011	12	13	347	13.9	4	8.95	69	20.0605	15.888	10.099	1.58443	2.08266
						2011	12	14	348	10.9	6.4	8.65	69	28.2002	10.1521	9.57148	1.48482	1.38804
						2011	12	15	349	13.6	4.3	8.95	80	12.0736	8.98273	5.89111	0.924249	1.28273
						2011	12	16	350	14.2	4.8	9.5	77.5	21.1761	15.9244	10.3879	1.66326	2.16541
						2011	12	17	351	7.2	3.9	5.55	73.5	33.363	8.80782	9.69709	1.32799	0.912394
						2011	12	18	352	8.2	2.7	5.45	77.5	19.8173	8.71961	7.43611	1.014	0.893049
						2011	12	19	353	12.3	3.9	8.1	85	13.056	8.77366	6.0544	0.919685	1.18089
						2011	12	20	354	14	5.4	9.7	91	3.74786	2.57853	1.75854	0.283631	0.56835
						2011	12	21	355	12.6	7.9	10.25	71	21.2204	7.97886	7.36075	1.21094	1.26708
						2011	12	22	356	11.8	6.3	9.05	73	22.6962	9.98631	8.51636	1.34112	1.40874
						2011	12	23	357	10.5	5.6	8.05	72.5	6.63205	2.59976	2.34891	0.356118	0.507736
						2011	12	24	358	8.7	5.9	7.3	84	6.28681	1.40824	1.68317	0.247783	0.355001
						2011	12	25	359	8.4	5.1	6.75	75	9.76688	2.57846	2.83879	0.408745	0.449138
						2011	12	26	360	12.2	2.9	7.55	81	20.5431	15.2841	10.0237	1.4903	1.80328
						2011	12	27	361	12.1	3	7.55	77	19.1801	13.9631	9.25746	1.37638	1.66618
						2011	12	28	362	11.8	2	6.9	78	19.1094	14.9817	9.57148	1.38658	1.66742
						2011	12	29	363	10.8	2.5	6.65	77	15.5597	10.3316	7.17233	1.02851	1.18278
						2011	12	30	364	9.1	3.1	6.1	83	23.3004	11.1842	9.13185	1.28004	1.18964
						2011	12	31	365	6.4	3.9	5.15	81	36.2954	7.25908	9.18209	1.23593	0.740735
																	1238.27	1856.68
																	ETo-HS	ETo-TURC (Ousman Couly (2016)

## Sheet: 2012
	KİLİS					year	month	day	DOY	Tmax	Tmin	Tmean	RHmean	Ra	Rs=0.16(Tmax-Tmin)^0.5*Ra	Rs=from meteorological station	ETo-HS	ETo-TURC (Ousman Couly (2016)
	DOY	246					#	#		°C	°C	°C	%	MJ m-2 day-1*(0.408 mm day-1)
	φ (-)	36.71	0.64071			2012	1	1	1	5.9	4.1	5	97	17.0454	2.45454	3.65902	0.489291	0.352202
	tan(φ)		0.745649			2012	1	2	2	10.5	5.4	7.95	79	45.9882	18.7632	16.6169	2.50955	2.23933
	sin(φ)		0.597765			2012	1	3	3	13.3	2.7	8	68.5	28.6318	24.2797	14.9149	2.25688	2.84335
	cos(φ)		0.801671			2012	1	4	4	12.3	3.1	7.7	66	32.4449	23.8794	15.7456	2.35488	2.73079
	dr	0.984766		(1+0.033*cos(2*3.14/365*DOY))		2012	1	5	5	10.9	3.2	7.05	65.5	36.9923	22.7873	16.4239	2.39371	2.46573
	δ	0.120494		(0.409*sin(2*3.14/365*DOY-1.39))		2012	1	6	6	6.7	4.1	5.4	76	49.4584	10.2873	12.7599	1.73621	1.01567
	tan(δ)	0.121081				2012	1	7	7	8.5	5	6.75	85	4.38657	1.22824	1.31304	0.18906	0.319238
	sin(δ)	0.120203				2012	1	8	8	7.1	5.3	6.2	76	23.3982	3.36935	5.02273	0.706999	0.494946
	cos(δ)	0.992749				2012	1	9	9	8.1	5.9	7	85	7.73997	1.36223	1.83684	0.267172	0.340516
	X	0.991849				2012	1	10	10	8.5	4.4	6.45	88.5	52.5056	17.2218	17.0105	2.41934	1.80019		-
	ωs (eq. 25)	1.49314		(acos{(-1*tan(-0.35)*tan(0.409*sin(2*3.14/365*DOY-1.39))))		2012	1	11	11	9	5.9	7.45	77.5	61.0536	15.1413	17.1994	2.54707	1.77264
	sin ωs	0.996986				2012	1	12	12	6.7	4.6	5.65	89	71.2882	11.9764	16.529	2.27331	1.19309
	sin φ*sin δ	-0.0718532		(sin(0.35)*sin(0.409*sin(2*3.14/365*DOY-1.39)))		2012	1	13	13	6	3.9	4.95	92	60.3576	10.1401	13.9946	1.86729	0.940704
	cos φ*cos δ	0.795859		(cos(0.35)*cos(0.409*sin(2*3.14/365*DOY-1.39))		2012	1	14	14	6.5	1.6	4.05	93	47.772	18.7266	16.9197	2.16826	1.37193
	Gsc	0.082				2012	1	15	15	8.4	5.4	6.9	97	40.7099	9.77039	11.2819	1.63435	1.15842
						2012	1	16	16	7.8	5.6	6.7	93	70.5772	12.4216	16.7493	2.40674	1.38897
	Ra	25.4105				2012	1	17	17	7.4	4.3	5.85	79.5	8.28604	2.05494	2.33425	0.323778	0.36052
						2012	1	18	18	8.1	1.4	4.75	72.5	23.2921	12.4846	9.64643	1.2758	1.08664
						2012	1	19	19	5.2	-2	1.6	57.5	43.6425	25.1381	18.7368	2.13189	0.813562
						2012	1	20	20	4	-4.2	-0.1	36.5	42.0838	27.607	19.2816	2.00163	-0.0737015
						2012	1	21	21	0.5	-2.8	-1.15	60	63.3147	16.7151	18.4027	1.79707	-0.484044
						2012	1	22	22	2.4	-1.7	0.35	81.5	55.3359	18.1502	17.9275	1.90838	0.143066
						2012	1	23	23	6.4	0.7	3.55	66.5	24.81	11.3133	9.47727	1.18672	0.795169
						2012	1	24	24	8.2	-1.3	3.45	75	37.881	28.7896	18.6811	2.32825	1.79001
						2012	1	25	25	4.4	0.2	2.3	89	58.7491	19.7397	19.264	2.27096	0.899686
						2012	1	26	26	3.8	1.4	2.6	93	73.0455	14.0247	18.1058	2.16629	0.737981
						2012	1	27	27	5.7	2.1	3.9	98	10.0669	2.89926	3.05609	0.38895	0.319154
						2012	1	28	28	10.8	1.9	6.35	73	12.97	9.23461	6.1909	0.876877	1.04415
						2012	1	29	29	7.4	0.6	4	61	26.9196	14.6443	11.2316	1.43604	1.09213
						2012	1	30	30	5.3	2.4	3.85	73.5	28.3856	6.58546	7.73423	0.982071	0.549292
						2012	1	31	31	5.2	3.1	4.15	90	77.8054	13.0713	18.0401	2.32242	1.01854
						2012	2	1	32	5.7	1.7	3.7	70.5	53.3071	17.0583	17.0583	2.151	1.17449
						2012	2	2	33	8.7	-1.6	3.55	45	14.9461	12.3156	7.67477	0.961018	0.915671
						2012	2	3	34	9.8	-0.8	4.5	58	12.1843	10.3323	6.34707	0.830131	0.888671
						2012	2	4	35	12.4	1.6	7	42.5	6.91179	5.97179	3.63432	0.528619	0.880384
						2012	2	5	36	13	2.1	7.55	50	1.94828	1.6989	1.02916	0.153014	0.393256
						2012	2	6	37	10.6	4	7.3	40	13.9663	7.37419	5.7408	0.845111	1.09763
						2012	2	7	38	6.9	1.5	4.2	70.5	55.2454	23.866	20.5406	2.65035	1.76014
						2012	2	8	39	8.2	1.1	4.65	49.5	47.9449	27.2327	20.4405	2.69139	2.16644
						2012	2	9	40	6.7	5	5.85	95	80.9323	11.0068	16.8837	2.34189	1.13914
						2012	2	10	41	12.1	2.9	7.5	67.5	13.7636	10.13	6.67952	0.991137	1.26273
						2012	2	11	42	11.1	0.4	5.75	53.5	19.9185	17.0502	10.4248	1.43988	1.64421
						2012	2	12	43	9.1	0	4.55	52.5	16.7989	12.2296	8.10813	1.06284	1.03313
						2012	2	13	44	10.4	2.7	6.55	42.5	26.7602	16.4843	11.881	1.69676	1.93763
						2012	2	14	45	13.6	3.7	8.65	42	27.2306	21.5666	13.7087	2.12661	2.9888
						2012	2	15	46	12.3	5.4	8.85	67.5	59.2685	32.7162	24.9097	3.89345	4.00381
						2012	2	16	47	11.4	4.2	7.8	62.5	56.9908	32.8267	24.4676	3.67366	3.70301
						2012	2	17	48	5.9	1.9	3.9	85	66.1494	21.1678	21.1678	2.69404	1.48776
						2012	2	18	49	6.7	-0.5	3.1	74	9.56917	5.51184	4.10828	0.503587	0.403612
						2012	2	19	50	7.7	-1	3.35	46	50.1865	34.9298	23.6846	2.93795	2.21482
						2012	2	20	51	9.6	-1.7	3.95	43.5	45.227	40.8852	24.3252	3.10302	3.0348
						2012	2	21	52	7.7	0	3.85	41	54.3644	33.4884	24.1368	3.06482	2.5423
						2012	2	22	53	11.2	0.3	5.75	39	46.1199	40.2165	24.3625	3.36496	4.20539
						2012	2	23	54	9.3	2	5.65	38.5	36.9647	21.5874	15.9797	2.19775	2.33821
						2012	2	24	55	11	2.3	6.65	38.5	35.9247	25.0036	16.954	2.43119	3.00366
						2012	2	25	56	12.7	2.5	7.6	37	40.2567	32.8495	20.5711	3.0645	4.3188
						2012	2	26	57	15.8	3.3	9.55	47	26.6763	26.6763	15.0904	2.42061	3.61761
						2012	2	27	58	9.9	6.7	8.3	80.5	45.7237	11.7053	13.0869	2.00329	1.5234
						2012	2	28	59	12.3	5.5	8.9	80	48.9169	26.6108	20.4095	3.19604	3.3132
						2012	3	1	60	10.2	-0.4	4.9	69.5	13.3835	11.3492	6.97177	0.928191	1.02584
						2012	3	2	61	3.6	-2.3	0.65	85.5	43.3924	20.4812	16.864	1.82484	0.290614
						2012	3	3	62	7	-0.9	3.05	64	43.462	27.468	19.5453	2.39011	1.54831
						2012	3	4	63	10.4	-0.7	4.85	52	34.7093	30.8218	18.5024	2.45789	2.49284
						2012	3	5	64	7	1.4	4.2	64	60.918	27.2913	23.0653	2.97612	1.99242
						2012	3	6	65	10.2	1.7	5.95	40.5	42.4574	28.871	19.8053	2.75876	3.09584
						2012	3	7	66	4.7	1.5	3.1	80.5	84.1067	21.5313	24.0727	2.9508	1.25415
						2012	3	8	67	6.5	2.7	4.6	83.5	78.2032	23.7738	24.3914	3.20444	1.88172
						2012	3	9	68	12.4	5.3	8.85	73.5	59.79	33.9607	25.4905	3.98422	4.14697
						2012	3	10	69	17.8	4.6	11.2	61.5	32.7428	34.5764	19.0337	3.23734	4.859
						2012	3	11	70	16.1	4.8	10.45	48	47.1015	42.5798	25.3334	4.1974	5.84842
						2012	3	12	71	10.6	0.3	5.45	42.5	36.1608	29.7965	18.5685	2.53202	2.91659
						2012	3	13	72	9.5	4.5	7	44.5	61.05	24.42	21.8419	3.17695	2.8203
						2012	3	14	73	15.2	7.3	11.25	60.5	58.3624	36.885	26.2462	4.47178	5.17811
						2012	3	15	74	11.3	5.3	8.3	77.5	49.8378	23.9222	19.5324	2.98994	2.8725
						2012	3	16	75	12.3	4.1	8.2	69.5	41.467	27.2023	18.9989	2.89715	3.20953
						2012	3	17	76	8.6	1.1	4.85	55	36.1818	21.7091	15.8541	2.10609	1.80262
						2012	3	18	77	9.1	-1.4	3.85	29.5	54.2657	45.5832	28.1345	3.57245	3.90244
						2012	3	19	78	13.8	-1.2	6.3	32	23.5831	28.2997	14.6139	2.06562	3.50294
						2012	3	20	79	16.4	2.9	9.65	38	18.9437	20.4592	11.1366	1.79293	3.20567
						2012	3	21	80	17.6	7.6	12.6	33.5	50.7755	40.6204	25.6906	4.58053	7.46921
						2012	3	22	81	20.8	8.4	14.6	32.5	47.4638	47.0841	26.742	5.08167	9.39872
						2012	3	23	82	19.7	8.5	14.1	28	52.401	46.9513	28.0588	5.24961	9.68143
						2012	3	24	83	18	6.2	12.1	36	50.7474	47.9056	27.8917	4.89119	8.30406
						2012	3	25	84	18.8	6.9	12.85	37	50.0043	47.604	27.5994	4.96134	8.42799
						2012	3	26	85	18.4	9.4	13.9	38.5	57.6742	41.5254	27.6836	5.14695	7.57143
						2012	3	27	86	19.3	11.9	15.6	46	47.747	28.2662	20.7818	4.07096	5.07162
						2012	3	28	87	18.2	8.4	13.3	53.5	43.1716	33.8465	21.6238	3.94421	5.23556
						2012	3	29	88	14.4	5.4	9.9	55	54.9465	39.5615	26.3743	4.28479	5.13367
						2012	3	30	89	12.6	5.4	9	75.5	50.7599	29.2377	21.7925	3.42539	3.64185
						2012	3	31	90	14.1	4.1	9.1	61.5	27.9415	22.3532	14.1374	2.23044	2.86117
						2012	4	1	91	13.7	6.7	10.2	74	47.0844	26.3673	19.9318	3.2732	3.57071
						2012	4	2	92	16.9	5.2	11.05	69	12.2638	11.4789	6.71176	1.13567	1.78427
						2012	4	3	93	20.9	10.2	15.55	55.5	19.8009	16.9495	10.3632	2.02703	3.00426
						2012	4	4	94	21	8.3	14.65	70.5	34.9834	35.5431	19.9473	3.79635	5.76428
						2012	4	5	95	21.7	11	16.35	47	50.6513	43.3575	26.5096	5.3096	7.66262
						2012	4	6	96	22.5	12.8	17.65	36.5	48.2577	37.4479	24.0476	4.99984	7.90361
						2012	4	7	97	25.7	13.1	19.4	31	27.084	27.3007	15.3822	3.35606	6.53291
						2012	4	8	98	26.3	14.1	20.2	37	34.8644	34.0277	19.4842	4.34244	7.61852
						2012	4	9	99	25.4	12.6	19	38	48.0563	49.2096	27.509	5.93732	10.4104
						2012	4	10	100	25.6	13.4	19.5	32.5	16.0009	15.6168	8.94218	1.95623	3.87818
						2012	4	11	101	21.6	9.5	15.55	51.5	46.4274	44.9417	25.8397	5.05418	7.42115
						2012	4	12	102	19.9	9.9	14.9	44.5	54.2006	43.3605	27.4236	5.25945	7.57294
						2012	4	13	103	18.9	7.3	13.1	62	53.11	49.2861	28.9418	5.24508	7.42485
						2012	4	14	104	23.5	8.9	16.2	53	31.9696	37.3405	19.5449	3.89745	6.3468
						2012	4	15	105	23.3	9.5	16.4	58	45.263	49.9704	26.9031	5.39631	8.42914
						2012	4	16	106	25	12.2	18.6	58.5	45.9409	47.0435	26.2981	5.61428	8.43166
						2012	4	17	107	18.7	10.1	14.4	69.5	62.2073	42.7986	29.1884	5.51232	6.81574
						2012	4	18	108	23.1	10.5	16.8	58	44.276	44.6302	25.1463	5.10291	7.65154
						2012	4	19	109	21.8	13.3	17.55	42.5	36.44	24.7792	16.9984	3.52424	4.97217
						2012	4	20	110	18.8	9.9	14.35	57	58.5929	41.7181	27.9679	5.27362	6.63988
						2012	4	21	111	20.7	8.8	14.75	47.5	45.3336	43.1576	25.0215	4.77675	7.20281
						2012	4	22	112	22.8	9.1	15.95	64	49.9733	54.7707	29.595	5.85814	9.08393
						2012	4	23	113	21.5	8.9	15.2	60.5	51.6748	52.0882	29.3484	5.68023	8.45323
						2012	4	24	114	25	11.3	18.15	47	47.2428	51.7781	27.978	5.89906	9.5348
						2012	4	25	115	26.4	14.9	20.65	34	37.2163	34.239	20.1931	4.55372	8.01449
						2012	4	26	116	28.4	15.9	22.15	37	48.6147	48.6147	27.5006	6.44358	11.1123
						2012	4	27	117	28.5	16.7	22.6	42.5	49.0707	46.3227	26.9701	6.39047	9.98724
						2012	4	28	118	27.4	15	21.2	46	38.2666	37.9605	21.5601	4.93155	7.68654
						2012	4	29	119	29	16.5	22.75	32.5	36.9371	36.9371	20.8948	4.96932	9.11387
						2012	4	30	120	30.6	20.9	25.75	22	57.7665	44.8268	28.786	7.35255	12.8667
						2012	5	1	121	27.9	17.9	22.9	40	60.6487	48.519	30.6861	7.32494	10.8337
						2012	5	2	122	29.3	18.8	24.05	37.5	59.3301	49.8372	30.7602	7.5501	11.6844
						2012	5	3	123	25.4	17.7	21.55	48.5	69.6475	42.9029	30.9223	7.13648	8.39989
						2012	5	4	124	22.7	14.7	18.7	68	66.9284	42.8342	30.2883	6.4839	7.72776
						2012	5	5	125	22.5	13.4	17.95	71	59.3993	43.2427	28.6696	6.01127	7.65566
						2012	5	6	126	23.9	12.9	18.4	67.5	57.4215	50.531	30.4713	6.46946	8.98652
						2012	5	7	127	25.9	12.4	19.15	61.5	51.6967	55.8325	30.3913	6.58616	10.069
						2012	5	8	128	23.6	12.6	18.1	64.5	57.7995	50.8635	30.6719	6.45807	8.9765
						2012	5	9	129	26.5	13.9	20.2	59	54.171	54.6044	30.7661	6.85684	10.0858
						2012	5	10	130	28.3	16.8	22.55	43	56.2782	51.776	30.5358	7.22638	11.0308
						2012	5	11	131	24	17.7	20.85	54	75.7701	38.1881	30.429	6.89772	7.26186
						2012	5	12	132	29.2	16.6	22.9	38.5	53.1964	53.622	30.2126	7.2119	12.1497
						2012	5	13	133	27.6	15.7	21.65	54	53.0303	50.4848	29.2696	6.77224	9.62772
						2012	5	14	134	27.1	13.4	20.25	50	49.1687	53.8889	29.1185	6.49818	9.969
						2012	5	15	135	22.4	14.4	18.4	63	65.3454	41.821	29.5719	6.27851	7.49906
						2012	5	16	136	24.8	13.6	19.2	67.5	52.763	47.2757	28.2526	6.13096	8.59136
						2012	5	17	137	26.8	13.9	20.35	62	48.0154	49.5518	27.5927	6.17387	9.21591
						2012	5	18	138	26.4	14.2	20.3	49	47.7733	46.6268	26.6984	5.96593	8.8089
						2012	5	19	139	30.1	15.6	22.85	39	51.335	59.5486	31.2765	7.45669	13.3482
						2012	5	20	140	26.9	15.9	21.4	54.5	57.1888	50.3261	30.3478	6.9772	9.55298
						2012	5	21	141	25.3	15.1	20.2	48	59.4432	48.5057	30.3754	6.76977	9.25802
						2012	5	22	142	23.7	11.8	17.75	61	45.2494	43.0774	24.975	5.20731	7.58881
						2012	5	23	143	27.3	12.7	20	52	38.004	44.3887	23.2341	5.15093	8.23336
						2012	5	24	144	28.2	15.4	21.8	50	41.5955	42.5938	23.8106	5.53011	8.20578
						2012	5	25	145	24.7	14.8	19.75	62.5	55.2064	43.7235	27.7925	6.12076	8.07174
						2012	5	26	146	23.6	13.1	18.35	61	48.8387	41.0245	25.3209	5.36853	7.35403
						2012	5	27	147	28.4	12.5	20.45	50.5	45.9384	58.4337	29.3086	6.57498	10.8234
						2012	5	28	148	28.8	15.3	22.05	51	51.1512	55.2432	30.0706	7.02811	10.5776
						2012	5	29	149	27.9	14.9	21.4	53.5	46.6865	48.5539	26.9329	6.19208	9.23
						2012	5	30	150	31.7	16.6	24.15	44	50.2624	60.7169	31.2501	7.68867	13.0398
						2012	5	31	151	27.1	16.7	21.9	49.5	61.1093	50.843	31.5315	7.3418	9.80837
						2012	6	1	152	27	14.1	20.55	55	54.65	56.3988	31.4054	7.0638	10.4811
						2012	6	2	153	26.4	12.3	19.35	52	51.7981	58.4283	31.1203	6.78064	10.5682
						2012	6	3	154	30.6	17.5	24.05	35	53.5494	56.1198	31.0106	7.61156	13.495
						2012	6	4	155	33.7	21.2	27.45	29	48.3579	48.3579	27.3553	7.25987	13.1466
						2012	6	5	156	35.5	19.8	27.65	32	47.0326	59.0729	29.8173	7.94823	15.4529
						2012	6	6	157	32.5	18	25.25	43	49.4603	57.3739	30.1343	7.60855	12.7205
						2012	6	7	158	31.5	17	24.25	50.5	49.5427	57.4696	30.1845	7.4442	11.4074
						2012	6	8	159	28.9	16.4	22.65	54	53.0202	53.0202	29.9927	7.11545	10.2777
						2012	6	9	160	31.6	17.6	24.6	43	45.9065	51.4153	27.4826	6.83427	11.3342
						2012	6	10	161	34.4	20.2	27.3	35	46.1418	52.4171	27.8201	7.35874	13.2421
						2012	6	11	162	36.5	22.1	29.3	29	44.6196	51.4018	27.0911	7.4837	14.2579
						2012	6	12	163	35.8	21.6	28.7	35.5	47.0008	53.3929	28.338	7.72842	13.6358
						2012	6	13	164	35.6	20	27.8	43	46.3741	57.8748	29.3061	7.83773	13.2817
						2012	6	14	165	39	21.4	30.2	41.5	43.8463	61.7355	29.4313	8.28549	14.8251
						2012	6	15	166	39.9	25.7	32.8	28	48.2258	54.7846	29.0766	8.62904	15.9007
						2012	6	16	167	40.7	24.3	32.5	22.5	45.4757	59.6641	29.466	8.69275	18.2442
						2012	6	17	168	42.5	30	36.25	13.5	51.3829	51.3829	29.0666	9.2142	17.8386
						2012	6	18	169	40.9	28.9	34.9	17.5	53.1095	50.9851	29.4363	9.09833	16.8501
						2012	6	19	170	39.2	25.3	32.25	16.5	48.3237	53.736	28.8262	8.46175	17.465
						2012	6	20	171	37	21.7	29.35	18	45.2276	55.3585	28.3054	7.82742	17.1734
						2012	6	21	172	37.4	27.6	32.5	24	55.6077	43.5965	27.8528	8.21683	13.2896
						2012	6	22	173	36.8	20.7	28.75	49.5	43.5535	56.0969	27.9612	7.63385	11.9382
						2012	6	23	174	31.6	16.6	24.1	64	44.4891	53.3869	27.5689	6.77487	10.6002
						2012	6	24	175	29.5	18.5	24	67	53.9065	47.4377	28.606	7.01296	9.44836
						2012	6	25	176	32.5	20.1	26.3	52	50.5181	50.1139	28.4628	7.36181	10.3055
						2012	6	26	177	33.5	18.2	25.85	59.5	44.3893	54.3325	27.7807	7.11207	11.0683
						2012	6	27	178	34	20.8	27.4	54	44.9478	47.4649	26.1286	6.92663	9.92734
						2012	6	28	179	35.2	22.5	28.85	46.5	45.9261	46.6609	26.1868	7.16475	10.4402
						2012	6	29	180	34.9	23.2	29.05	42.5	38.2869	35.8366	20.9538	5.7576	8.58439
						2012	6	30	181	33.1	20.4	26.75	42	1.90114	1.93155	1.08401	0.283237	0.89006
						2012	7	1	182	34.3	22.4	28.35	21.5	45.3465	43.1699	25.0286	6.77449	12.9115
						2012	7	2	183	33.5	21.5	27.5	19.5	49.6995	47.7115	27.5463	7.31862	14.3422
						2012	7	3	184	31.9	19.7	25.8	21	51.5883	50.3502	28.8304	7.37234	14.5386
						2012	7	4	185	30.3	19.6	24.95	25	56.5313	48.3908	29.587	7.41832	13.2638
						2012	7	5	186	32	18.9	25.45	34	48.1904	50.5035	27.9072	7.07897	12.6027
						2012	7	6	187	33.9	21.4	27.65	32	49.061	49.061	27.7531	7.39799	12.9234
						2012	7	7	188	34.4	21.7	28.05	33	47.9917	48.7596	27.3646	7.35861	12.7653
						2012	7	8	189	35.6	22.1	28.85	35.5	47.2603	51.0411	27.7833	7.60156	13.0811
						2012	7	9	190	34.4	21.8	28.1	43	47.5839	47.9646	27.025	7.27522	11.1283
						2012	7	10	191	33.4	22.5	27.95	44.5	47.3223	41.265	24.9976	6.70746	9.43341
						2012	7	11	192	35.5	22.6	29.05	42.5	45.9935	47.4653	26.4309	7.26255	11.2165
						2012	7	12	193	37.1	23.8	30.45	43	45.4408	48.349	26.515	7.50338	11.5232
						2012	7	13	194	38.4	22.8	30.6	41	42.2172	52.6871	26.6791	7.5733	12.8602
						2012	7	14	195	39.2	26.5	32.85	29.5	46.6663	47.413	26.6088	7.90447	13.6206
						2012	7	15	196	39	24.8	31.9	27.5	43.1869	49.0604	26.0385	7.58999	14.2519
						2012	7	16	197	40.2	26.8	33.5	26.5	44.3559	47.5495	25.9791	7.81644	14.1973
						2012	7	17	198	39.4	27.5	33.45	27	46.646	44.4069	25.7459	7.73872	13.2213
						2012	7	18	199	41.9	28.1	35	23	43.1244	47.6093	25.632	7.93751	14.9446
						2012	7	19	200	42.8	29.4	36.1	20	43.8948	47.0552	25.709	8.12722	15.3756
						2012	7	20	201	42.6	30.2	36.4	14.5	46.7897	46.4154	26.3622	8.38009	16.0489
						2012	7	21	202	41	28.2	34.6	23.5	47.1807	48.3131	27.0078	8.30021	15.026
						2012	7	22	203	41.9	23.5	32.7	47	39.5656	58.2405	27.1548	8.04277	13.3707
						2012	7	23	204	37.4	22.5	29.95	52	43.7338	52.1307	27.0103	7.56435	11.1994
						2012	7	24	205	39.5	22.6	31.05	44	39.8436	53.8685	26.2073	7.50852	12.6992
						2012	7	25	206	35.7	22	28.85	51.5	44.8404	49.1451	26.5552	7.26557	10.4497
						2012	7	26	207	37.1	22	29.55	52	41.2256	49.8005	25.6316	7.11808	10.6699
						2012	7	27	208	40.1	24.7	32.4	41	35.7827	44.0843	22.4674	6.61493	11.0423
						2012	7	28	209	40.4	23.1	31.75	48.5	28.6236	39.615	19.0488	5.53577	8.9685
						2012	7	29	210	37.8	23.7	30.75	57	33.4403	37.7206	20.0909	5.7208	8.29497
						2012	7	30	211	38.1	24.6	31.35	47.5	38.4408	41.5161	22.5985	6.51435	9.46971
						2012	7	31	212	37.1	22.3	29.7	40.5	34.2037	40.4972	21.0535	5.86524	9.96228
						2012	8	1	213	36.6	21.8	29.2	51	36.9831	43.788	22.7643	6.27509	9.39565
						2012	8	2	214	36.8	22.6	29.7	52	40.7029	46.2385	24.5408	6.83677	9.95437
						2012	8	3	215	35.2	21.2	28.2	48.5	40.5331	45.3971	24.2658	6.54666	9.81546
						2012	8	4	216	34.9	18.1	26.5	48	37.0494	49.7944	24.2972	6.31288	10.564
						2012	8	5	217	35.3	20	27.65	49.5	38.0209	46.5376	23.7951	6.34293	9.84264
						2012	8	6	218	37.1	23.4	30.25	45	40.0391	43.8829	23.7118	6.6823	10.2078
						2012	8	7	219	37	24.6	30.8	39	41.9043	41.5691	23.6097	6.72967	10.5319
						2012	8	8	220	36.9	24.1	30.5	39	41.496	42.4919	23.7537	6.72893	10.72
						2012	8	9	221	36.1	22.7	29.4	49.5	39.4676	42.3092	23.116	6.39916	9.17894
						2012	8	10	222	37.1	23.5	30.3	46.5	39.5531	43.0338	23.3383	6.5839	9.82428
						2012	8	11	223	37.6	24.9	31.25	40	37.7686	38.3729	21.5354	6.19527	9.68611
						2012	8	12	224	38.1	24.2	31.15	39.5	37.9139	42.1602	22.6165	6.49301	10.6478
						2012	8	13	225	35.9	24	29.95	46	41.6976	39.6962	23.0147	6.44535	9.1242
						2012	8	14	226	35	21.2	28.1	47	39.5211	43.6313	23.4903	6.32368	9.63684
						2012	8	15	227	34.8	23.6	29.2	50	44.5433	39.9108	23.8512	6.57472	8.60161
						2012	8	16	228	34.7	22.2	28.45	52	40.3567	40.3567	22.8292	6.19256	8.61585
						2012	8	17	229	36.9	22.2	29.55	48	36.9981	43.5098	22.6965	6.30299	9.64426
						2012	8	18	230	37.1	23.6	30.35	41.5	39.0313	42.1538	22.9456	6.47983	10.2936
						2012	8	19	231	36.9	23.9	30.4	39	38.1628	39.6893	22.0157	6.22367	10.0352
						2012	8	20	232	35.8	21.8	28.8	45	37.5208	42.0233	22.4624	6.13918	9.63415
						2012	8	21	233	35	23.7	29.35	36.5	34.8997	31.5494	18.7707	5.19076	8.23213
						2012	8	22	234	34.8	21.3	28.05	21	30.3293	32.7557	17.8299	4.79465	9.95422
						2012	8	23	235	36.9	23.3	30.1	22	36.4365	39.6429	21.4994	6.0399	12.0881
						2012	8	24	236	37.5	22.1	29.8	27.5	33.8509	41.7043	21.2545	5.93369	11.9333
						2012	8	25	237	38.6	21.5	30.05	34	29.4094	40.232	19.4582	5.46077	10.7517
						2012	8	26	238	38.5	22.7	30.6	40	33.3591	42.1659	21.2159	6.02249	10.5216
						2012	8	27	239	38	21.9	29.95	42.5	32.2074	41.4832	20.6771	5.79069	9.96442
						2012	8	28	240	37.9	26.1	32	26	36.4469	34.4059	20.0319	5.85085	10.344
						2012	8	29	241	36.8	21.9	29.35	46	33.444	39.8653	20.6553	5.71191	9.09906
						2012	8	30	242	37.2	24.6	30.9	32	34.0036	34.2756	19.3121	5.51603	9.54076
						2012	8	31	243	35.7	21.9	28.8	45.5	26.6856	29.4609	15.8612	4.33501	6.84462
						2012	9	1	244	35	22.8	28.9	42	29.1367	28.4375	16.2832	4.45991	6.94196
						2012	9	2	245	35	21	28	41	22.4672	25.1632	13.4503	3.61298	6.20867
						2012	9	3	246	34.3	20.2	27.25	44	27.2894	30.7824	16.3955	4.33198	7.1359
						2012	9	4	247	35.4	23.9	29.65	30.5	30.6856	28.2308	16.6496	4.63349	7.9805
						2012	9	5	248	37.2	24.5	30.85	30.5	24.0546	24.4395	13.7158	3.91355	7.07508
						2012	9	6	249	37.6	26.1	31.85	28	12.8522	11.8241	6.97345	2.03065	3.85394
						2012	9	7	250	36.9	22.4	29.65	39	12.3604	14.3381	7.53074	2.09576	3.91326
						2012	9	8	251	35	21.2	28.1	50.5	27.1625	29.9874	16.1447	4.3462	6.4832
						2012	9	9	252	34.4	21.9	28.15	48	27.617	27.617	15.6225	4.21022	6.17949
						2012	9	10	253	34.4	20.2	27.3	47.5	16.6896	18.9594	10.0626	2.66168	4.36178
						2012	9	11	254	35.2	21	28.1	43	10.3924	11.8058	6.26585	1.68679	3.08934
						2012	9	12	255	35.2	21.9	28.55	37	31.9959	34.0437	18.6698	5.07526	8.70706
						2012	9	13	256	33.7	21.2	27.45	45.5	32.1009	32.1009	18.159	4.81924	7.2945
						2012	9	14	257	31.7	17.9	24.8	50.5	24.68	27.2467	14.6692	3.66507	5.66686
						2012	9	15	258	32.2	16.7	24.45	45.5	28.2266	35.001	17.7805	4.40594	7.58438
						2012	9	16	259	35.2	20.4	27.8	41	28.7993	34.0984	17.7269	4.74096	8.22359
						2012	9	17	260	36.7	23	29.85	30.5	30.4451	33.3678	18.0301	5.03881	9.35363
						2012	9	18	261	32.8	19.9	26.35	51.5	31.5745	32.5849	18.1448	4.69841	6.84987
						2012	9	19	262	33.2	18.6	25.9	56	28.5035	33.2921	17.4259	4.46626	6.94579
						2012	9	20	263	30.5	18.3	24.4	57	17.7885	17.3615	9.94119	2.46048	3.7343
						2012	9	21	264	30	16.3	23.15	59	21.1084	23.1348	12.5007	3.00232	4.7451
						2012	9	22	265	30.2	17	23.6	58	1.84533	1.94867	1.07271	0.260466	0.765465
						2012	9	23	266	30.7	17	23.85	59	17.2629	18.9202	10.2234	2.49734	3.99843
						2012	9	24	267	31.1	18.7	24.9	49	16.9005	16.7653	9.52208	2.38467	3.69984
						2012	9	25	268	31.2	18.2	24.7	37	6.63808	6.9036	3.82943	0.954533	2.05675
						2012	9	26	269	31.8	18.2	25	51	21.4952	23.3868	12.6833	3.18378	4.93613
						2012	9	27	270	32.4	18.1	25.25	51.5	19.6643	22.4959	11.8978	3.00405	4.78128
						2012	9	28	271	33.6	18.5	26.05	54	25.0127	30.2153	15.5514	3.9995	6.35521
						2012	9	29	272	34.6	20	27.3	25.5	25.5606	29.8548	15.6267	4.13345	8.62816
						2012	9	30	273	34.6	21.6	28.1	21	22.9444	23.8622	13.2364	3.56328	7.41826
						2012	10	1	274	36.3	23.4	29.85	19	18.1421	18.7226	10.4256	2.91362	6.19575
						2012	10	2	275	36.5	24.6	30.55	29	26.6919	25.4107	14.7324	4.1777	7.43312
						2012	10	3	276	34.1	22.8	28.45	31	15.7641	14.2507	8.47867	2.29989	4.21714
						2012	10	4	277	31.4	21.4	26.4	42.5	28.5324	22.8259	14.4364	3.74238	5.45312
						2012	10	5	278	29.1	17.4	23.25	54	22.2377	20.8145	12.1704	2.93011	4.31593
						2012	10	6	279	29.6	18	23.8	50	24.988	23.1888	13.617	3.32232	4.80689
						2012	10	7	280	23.2	15.3	19.25	67	29.3679	18.5605	13.2071	2.86987	3.59801
						2012	10	8	281	28.4	17.9	23.15	46.5	27.4329	23.0436	14.2228	3.41592	4.96435
						2012	10	9	282	25.6	16.2	20.9	56	19.6432	14.7716	9.63596	2.18713	3.04308
						2012	10	10	283	26.1	14.2	20.15	60	5.27071	5.01772	2.90913	0.647504	1.26311
						2012	10	11	284	24.2	14.8	19.5	63.5	10.3106	7.75361	5.0579	1.10649	1.72477
						2012	10	12	285	20.7	15.4	18.05	69	20.0616	8.50611	7.38964	1.55375	1.79396
						2012	10	13	286	25.7	12.6	19.15	61	11.8907	12.4615	6.88594	1.49226	2.52957
						2012	10	14	287	27.6	14.7	21.15	49	18.5035	19.0956	10.6333	2.42909	3.89731
						2012	10	15	288	28.5	16.6	22.55	36.5	24.3918	23.221	13.4629	3.18603	5.62078
						2012	10	16	289	30.2	17.9	24.05	33.5	23.5719	23.1947	13.2272	3.24661	5.96529
						2012	10	17	290	31.2	19	25.1	31.5	22.6808	22.1365	12.6753	3.18921	5.94328
						2012	10	18	291	31.5	17.7	24.6	26	16.8121	18.5606	9.99269	2.48494	5.34028
						2012	10	19	292	30.3	19.7	25	22.5	2.8598	2.42511	1.48973	0.373956	1.21848
						2012	10	20	293	30.3	20.7	25.5	16.5	15.0371	11.5485	7.45453	1.89311	3.93601
						2012	10	21	294	24.3	17.4	20.85	37	29.1387	16.0845	12.2466	2.77608	3.88528
						2012	10	22	295	23.1	15.7	19.4	54.5	26.6325	15.7664	11.5917	2.52906	3.12176
						2012	10	23	296	20.6	14.2	17.4	69	7.40535	3.79154	2.99747	0.618822	0.979167
						2012	10	24	297	21.7	14.2	17.95	75	6.66972	4.00183	2.92253	0.612777	1.02877
						2012	10	25	298	19.9	13.7	16.8	70	4.46974	2.21699	1.78073	0.361362	0.705372
						2012	10	26	299	17.5	10.3	13.9	79.5	17.9242	10.3243	7.69529	1.43071	1.85098
						2012	10	27	300	19.4	11	15.2	75.5	21.4504	14.4147	9.94706	1.9252	2.57516
						2012	10	28	301	20.2	11.4	15.8	74.5	25.51	17.959	12.108	2.38604	3.18831
						2012	10	29	302	22.2	11.7	16.95	70	22.7238	19.088	11.7814	2.40115	3.48294
						2012	10	30	303	23.9	12.1	18	59.5	19.3109	18.2295	10.6136	2.22851	3.43584
						2012	10	31	304	21.4	12.8	17.1	59	17.0679	11.7427	8.00847	1.63924	2.28434
						2012	11	1	305	21.6	14.8	18.2	57	23.35	12.7024	9.74231	2.05699	2.51382
						2012	11	2	306	24.6	15.8	20.2	48	22.7224	15.9966	10.7849	2.40363	3.30949
						2012	11	3	307	22.8	15.9	19.35	55.5	15.6497	8.63865	6.57736	1.43311	1.87353
						2012	11	4	308	25.6	15.6	20.6	56	3.18929	2.55144	1.61367	0.363424	0.83259
						2012	11	5	309	25.1	15.1	20.1	54	22.5849	18.0679	11.4272	2.54007	3.57846
						2012	11	6	310	25.3	15.8	20.55	49	4.37758	3.32696	2.15882	0.485567	0.984578
						2012	11	7	311	25	14.4	19.7	46	2.47882	2.10204	1.29127	0.283999	0.779933
						2012	11	8	312	24.6	13.9	19.25	46.5	19.5144	16.7044	10.2133	2.21934	3.43834
						2012	11	9	313	22.4	14.4	18.4	51.5	13.013	8.32833	5.88902	1.25031	1.77923
						2012	11	10	314	17.8	12	14.9	70.5	9.53816	4.42571	3.67535	0.704879	1.00656
						2012	11	11	315	17.2	11.5	14.35	82	5.28753	2.41111	2.01981	0.380855	0.682222
						2012	11	12	316	13.5	10.4	11.95	83	19.7542	4.89905	5.56494	0.970992	0.960702
						2012	11	13	317	15.7	9.3	12.5	78	12.0923	6.19124	4.8946	0.869817	1.1669
						2012	11	14	318	19.7	11.4	15.55	62	21.8844	14.5312	10.0877	1.97314	2.62268
						2012	11	15	319	20.8	12.1	16.45	65	22.0142	15.3219	10.3892	2.08694	2.82327
						2012	11	16	320	20.1	11.7	15.9	60	14.8014	9.94652	6.86375	1.35662	1.92
						2012	11	17	321	20.6	10.6	15.6	65.5	2.49748	1.99798	1.26364	0.247535	0.646062
						2012	11	18	322	17.7	12.3	15	65	2.21509	0.956917	0.823583	0.158434	0.472272
						2012	11	19	323	14.5	11	12.75	66.5	4.37538	1.22511	1.30969	0.234665	0.472179
						2012	11	20	324	17.3	10.9	14.1	59.5	3.15806	1.61692	1.27829	0.23916	0.556803
						2012	11	21	325	19	8.2	13.6	64	5.7524	4.97007	3.02469	0.55703	1.04074
						2012	11	22	326	19.1	9.3	14.2	64.5	3.0896	2.42224	1.54752	0.290438	0.680236
						2012	11	23	327	14.9	11.1	13	79.5	12.0872	3.67452	3.76997	0.681016	0.829679
						2012	11	24	328	13	10.3	11.65	89.5	29.4532	6.36188	7.74344	1.33748	1.14536
						2012	11	25	329	12.1	10.2	11.15	83.5	36.9805	5.62104	8.15586	1.3848	1.01924
						2012	11	26	330	15.6	8.8	12.2	79	26.0766	14.1857	10.8799	1.91432	2.26304
						2012	11	27	331	16.7	9.3	13	68.5	24.5325	14.5232	10.6777	1.92884	2.39112
						2012	11	28	332	16.7	9	12.85	59.5	18.9017	11.6434	8.392	1.50857	1.96435
						2012	11	29	333	15.4	6.8	11.1	67	22.2846	15.3318	10.4562	1.77231	2.29687
						2012	11	30	334	14.6	7.5	11.05	70.5	23.6282	13.4208	10.0735	1.70449	2.03963
						2012	12	1	335	14.4	8.6	11.5	70.5	28.2461	13.1062	10.8841	1.87037	2.04432
						2012	12	2	336	16.1	8.4	12.25	66	22.4042	13.801	9.94706	1.7531	2.21453
						2012	12	3	337	18	8.2	13.1	67	24.1734	18.952	12.108	2.19431	3.04098
						2012	12	4	338	14.9	6.8	10.85	75	25.8722	16.7652	11.7814	1.97965	2.45336
						2012	12	5	339	12.3	8	10.15	89	31.9897	11.0044	10.6136	1.73986	1.63824
						2012	12	6	340	13.2	3.5	8.35	65	16.071	12.4711	8.00847	1.22826	1.6142
						2012	12	7	341	8.6	4.4	6.5	80.5	29.711	9.9829	9.74231	1.38847	1.13148
						2012	12	8	342	8.5	6.5	7.5	95.5	47.6629	7.62606	10.7849	1.60031	1.00399
						2012	12	9	343	13.4	5	9.2	77.5	14.1838	9.5315	6.57736	1.04156	1.36961
						2012	12	10	344	11.3	7.2	9.25	87	4.98084	1.63372	1.61367	0.256006	0.44032
						2012	12	11	345	9.5	7.4	8.45	91	49.2843	8.27976	11.4272	1.75928	1.15836
						2012	12	12	346	10.1	7	8.55	90.5	7.66329	1.90049	2.15882	0.33363	0.449121
						2012	12	13	347	10.8	4.5	7.65	87	3.21534	1.62053	1.29127	0.192741	0.3885
						2012	12	14	348	11	5.8	8.4	85	27.9928	11.645	10.2133	1.56941	1.52846
						2012	12	15	349	13.2	5.9	9.55	63.5	13.6226	7.95562	5.88902	0.944644	1.21141
						2012	12	16	350	13.7	2.3	8	44	6.8034	6.2047	3.67535	0.556143	0.971047
						2012	12	17	351	8.7	0.1	4.4	59.5	4.30468	2.96162	2.01981	0.262985	0.355176
						2012	12	18	352	6	3.2	4.6	83	20.7856	4.65596	5.56494	0.7311	0.490803
						2012	12	19	353	7.1	3.1	5.1	94.5	15.2956	4.8946	4.8946	0.657387	0.549386
						2012	12	20	354	8.4	6.9	7.65	92.5	51.4788	6.17745	10.0877	1.50574	0.865619
						2012	12	21	355	8	6.8	7.4	98.5	59.275	5.6904	10.3892	1.5355	0.796796
						2012	12	22	356	8	5.5	6.75	94.5	27.1314	5.42627	6.86375	0.988282	0.723117
						2012	12	23	357	7.2	3.7	5.45	96	4.22151	1.18202	1.26364	0.172311	0.270322
						2012	12	24	358	9.6	7.1	8.35	92	3.2555	0.651099	0.823583	0.126313	0.303869
						2012	12	25	359	12	8.4	10.2	80	4.31418	1.24248	1.30969	0.215078	0.418147
						2012	12	26	360	14.5	7.9	11.2	71.5	3.10984	1.64199	1.27829	0.217418	0.494561
						2012	12	27	361	16.2	5.8	11	63	5.86198	4.87716	3.02469	0.510906	0.91377
						2012	12	28	362	13.6	5.5	9.55	58.5	3.39838	2.20215	1.54752	0.248233	0.517593
						2012	12	29	363	12.1	4.3	8.2	58	8.43667	5.26448	3.76997	0.574883	0.805823
						2012	12	30	364	10.4	3.6	7	53	18.5592	10.0962	7.74344	1.1263	1.202
						2012	12	31	365	11.4	4.5	7.95	59.5	19.4055	10.7118	8.15586	1.23173	1.37473
										10.8	3.2
																	1336.11	2094.29
																	ETo-HS	ETo-TURC (Ousman Couly (2016)

## Sheet: 2013
	KİLİS					year	month	day	DOY	Tmax	Tmin	Tmean	RHmean	Ra	Rs=0.16(Tmax-Tmin)^0.5*Ra	Rs=from meteorological station	ETo-HS	ETo-TURC (Ousman Couly (2016)
	DOY	246					#	#		°C	°C	°C	%	MJ m-2 day-1*(0.408 mm day-1)
	φ (-)	36.71	0.64071			2013	1	1	1	10.2	4.4	7.3	57.5	20.2466	9.39442	7.80164	1.14849	1.16544
	tan(φ)		0.745649			2013	1	2	2	10.9	5.6	8.25	73	3.50785	1.48733	1.29211	0.197412	0.393506
	sin(φ)		0.597765			2013	1	3	3	13.7	4.5	9.1	69	3.65378	2.68918	1.77319	0.279754	0.559422
	cos(φ)		0.801671			2013	1	4	4	11.9	3.5	7.7	62	6.53163	4.38926	3.02888	0.452991	0.681321
	dr	0.984766		(1+0.033*cos(2*3.14/365*DOY))		2013	1	5	5	6.8	4	5.4	77.5	22.1446	4.96038	5.92879	0.806719	0.578546
	δ	0.120494		(0.409*sin(2*3.14/365*DOY-1.39))		2013	1	6	6	7.1	3.7	5.4	95	16.8956	4.5956	4.98462	0.678248	0.548612
	tan(δ)	0.121081				2013	1	7	7	8.1	3.9	6	54.5	8.13643	2.73384	2.66796	0.372412	0.427255
	sin(δ)	0.120203				2013	1	8	8	6.1	0.7	3.4	61	33.4571	14.4535	12.4396	1.54671	0.947654
	cos(δ)	0.992749				2013	1	9	9	3.3	-1.5	0.9	76.5	35.0638	13.4645	12.2914	1.34806	0.272938
	X	0.991849				2013	1	10	10	5.7	-3.8	0.95	59.5	18.4943	14.0557	9.12054	1.00297	0.298113		-
	ωs (eq. 25)	1.49314		(acos{(-1*tan(-0.35)*tan(0.409*sin(2*3.14/365*DOY-1.39))))		2013	1	11	11	3.3	-3.4	-0.05	51.5	27.5929	14.7898	11.4276	1.18965	-0.0175008
	sin ωs	0.996986				2013	1	12	12	2.3	0.1	1.2	78	23.2358	4.0895	5.51428	0.614484	0.1419
	sin φ*sin δ	-0.0718532		(sin(0.35)*sin(0.409*sin(2*3.14/365*DOY-1.39)))		2013	1	13	13	6.2	0.9	3.55	67	30.2919	12.8437	11.1579	1.39717	0.885962
	cos φ*cos δ	0.795859		(cos(0.35)*cos(0.409*sin(2*3.14/365*DOY-1.39))		2013	1	14	14	11.6	0.7	6.15	66	9.34905	8.15238	4.93857	0.693704	0.923267
	Gsc	0.082				2013	1	15	15	11.9	1.9	6.9	61	20.7536	16.6029	10.5006	1.52117	1.82576
						2013	1	16	16	9.5	2	5.75	58.5	2.90678	1.74407	1.27369	0.175922	0.32936
	Ra	25.4105				2013	1	17	17	8.6	2.3	5.45	60.5	13.0782	6.59142	5.25217	0.716193	0.717226
						2013	1	18	18	8.3	2	5.15	58.5	10.7793	5.43278	4.32894	0.582683	0.596035
						2013	1	19	19	10.6	3.9	7.25	57.5	10.6437	5.70501	4.40807	0.647626	0.787383
						2013	1	20	20	10.7	3	6.85	79.5	38.7738	23.8846	17.2149	2.48879	2.52435
						2013	1	21	21	10.5	7	8.75	89	57.1555	16.0035	17.1085	2.66406	2.06647
						2013	1	22	22	11.4	7.7	9.55	80.5	43.0609	12.746	13.2527	2.12583	1.78909
						2013	1	23	23	11.5	5	8.25	69.5	30.8502	16.0421	12.5844	1.92269	1.99453
						2013	1	24	24	12.4	7.2	9.8	75.5	20.7516	8.63267	7.57135	1.22561	1.31353
						2013	1	25	25	11.2	7.8	9.5	74.5	59.3538	16.1442	17.5109	2.80374	2.19183
						2013	1	26	26	12.8	5.1	8.95	73.5	43.2976	26.6713	19.2234	3.01593	3.33187
						2013	1	27	27	13.8	7.8	10.8	72	16.7184	8.02482	6.55224	1.09907	1.31257
						2013	1	28	28	11	5.4	8.2	74.5	48.6035	21.7744	18.4027	2.80623	2.61479
						2013	1	29	29	13	4.8	8.9	56.5	21.5157	14.1143	9.85787	1.5437	1.87062
						2013	1	30	30	8.3	2.1	5.2	57.5	40.5671	20.1213	16.1618	2.18015	1.77251
						2013	1	31	31	8.2	4.1	6.15	69	58.9753	19.3439	19.1065	2.68383	1.93209
						2013	2	1	32	10.2	3.9	7.05	69	56.3425	28.3966	22.627	3.29777	3.0217
						2013	2	2	33	12	2.9	7.45	57.5	18.9901	13.8248	9.16576	1.35737	1.63721
						2013	2	3	34	8.2	5.6	6.9	76.5	78.5086	16.3298	20.2546	2.93419	1.79908
						2013	2	4	35	11.3	6.7	9	70.5	44.0233	16.2006	15.1071	2.37457	2.12628
						2013	2	5	36	13.3	7.8	10.55	66.5	52.6587	23.1698	19.7593	3.28543	3.23336
						2013	2	6	37	10	7	8.5	69.5	52.7227	12.6535	14.611	2.25373	1.65315
						2013	2	7	38	11.2	6.2	8.7	67	22.1491	8.85965	7.92432	1.23162	1.24604
						2013	2	8	39	11.5	7.5	9.5	73.5	76.7569	24.5622	24.5622	3.93276	3.2037
						2013	2	9	40	12.4	8.6	10.5	72	58.103	17.6633	18.1222	3.00791	2.52145
						2013	2	10	41	15.4	9.3	12.35	61.5	31.9748	15.6037	12.6355	2.23434	2.4768
						2013	2	11	42	11.3	7.1	9.2	81	52.3339	17.5842	17.1604	2.71744	2.31863
						2013	2	12	43	14.3	4.5	9.4	65	21.8337	17.1176	10.936	1.7446	2.29389
						2013	2	13	44	15	4.1	9.55	58	17.009	14.8319	8.98488	1.44124	2.04062
						2013	2	14	45	13.2	7.2	10.2	58	23.9745	11.5078	9.39605	1.54302	1.7062
						2013	2	15	46	12.2	6.2	9.2	65.5	50.9574	24.4596	19.9712	3.16253	3.1289
						2013	2	16	47	11	4.8	7.9	68.5	40.5083	20.0921	16.1384	2.43255	2.37223
						2013	2	17	48	11.1	5.3	8.2	62.5	53.0792	24.6288	20.4531	3.11889	2.92755
						2013	2	18	49	9.3	5.1	7.2	71	57.0419	19.1661	18.7042	2.7425	2.1371
						2013	2	19	50	11.7	2.1	6.9	60	41.8437	32.1359	20.7437	3.00504	3.34289
						2013	2	20	51	11.6	4.8	8.2	68	19.353	10.528	8.07463	1.2313	1.38254
						2013	2	21	52	12.7	3	7.85	55.5	42.7609	33.1824	21.3085	3.20559	3.75648
						2013	2	22	53	10.1	6.7	8.4	62	78.9841	21.4837	23.3023	3.58071	2.62333
						2013	2	23	54	14	7.3	10.65	61.5	52.4692	28.1235	21.7301	3.62587	3.88888
						2013	2	24	55	17.1	7.5	12.3	70.5	38.7617	29.769	19.2158	3.39229	4.44976
						2013	2	25	56	17.9	8.8	13.35	65	39.7595	28.9449	19.1903	3.50596	4.53044
						2013	2	26	57	17.2	9.1	13.15	67.5	46.7195	30.2742	21.2746	3.8618	4.68678
						2013	2	27	58	17.3	9.4	13.35	53	38.4977	24.3305	17.3128	3.16296	3.85684
						2013	2	28	59	12.1	5.5	8.8	62.5	54.3697	28.7072	22.3485	3.48657	3.53003
						2013	3	1	60	14.4	4.5	9.45	45.5	49.4245	39.1442	24.8817	3.97662	5.25812
						2013	3	2	61	14.6	3.2	8.9	47	42.7022	38.9444	23.0687	3.61245	4.94
						2013	3	3	62	13.4	7.3	10.35	54	30.2626	14.7682	11.9589	1.97441	2.1337
						2013	3	4	63	15.5	6.6	11.05	52	43.7554	31.1539	20.8856	3.53395	4.37147
						2013	3	5	64	15.1	4.4	9.75	41.5	33.7753	28.9116	17.6771	2.85628	4.24568
						2013	3	6	65	11.9	-0.1	5.9	35.5	29.1587	27.9924	16.1614	2.24644	3.17788
						2013	3	7	66	12.8	-0.1	6.35	37.5	27.1243	27.9922	15.5874	2.20779	3.26891
						2013	3	8	67	10.8	5.9	8.35	41.5	70.7111	27.7188	25.0441	3.84101	3.70576
						2013	3	9	68	14.4	6.2	10.3	42	55.2881	36.269	25.3313	4.17477	5.39438
						2013	3	10	69	16.5	7.4	11.95	43.5	57.7529	42.0441	27.875	4.86373	6.62992
						2013	3	11	70	17.2	6.9	12.05	56.5	53.8914	44.4066	27.6731	4.84474	6.42099
						2013	3	12	71	20.2	8.4	14.3	64	51.2769	48.4054	28.1827	5.30586	7.63979
						2013	3	13	72	21.9	12.7	17.3	57.5	54.0095	39.751	26.211	5.39584	6.94716
						2013	3	14	73	21.4	9.9	15.65	48	38.995	35.8754	21.1582	4.1509	6.18113
						2013	3	15	74	22.2	13.8	18	48	42.6967	28.6922	19.7995	4.15724	5.3537
						2013	3	16	75	20.8	10.1	15.45	48.5	48.3697	41.4045	25.3154	4.9368	6.98787
						2013	3	17	76	10.3	4.4	7.35	65.5	51.9498	24.5203	20.1897	2.97808	2.71282
						2013	3	18	77	14	2.8	8.4	43.5	34.0199	30.4818	18.2164	2.79918	3.96124
						2013	3	19	78	13.9	2.7	8.3	60.5	41.8166	37.4677	22.3912	3.42757	4.36833
						2013	3	20	79	18.2	7.9	13.05	58.5	36.7096	30.2487	18.8503	3.41068	4.66404
						2013	3	21	80	20.6	7.5	14.05	59.5	37.6033	39.4082	21.7762	4.06779	6.22188
						2013	3	22	81	19.9	12.2	16.05	61	19.8428	12.2232	8.80987	1.74903	2.29357
						2013	3	23	82	13.5	4.1	8.8	58.5	24.8505	18.6876	12.1905	1.90182	2.38157
						2013	3	24	83	15.7	2.4	9.05	56	33.2072	35.3324	19.3766	3.05133	4.36543
						2013	3	25	84	17.7	5.7	11.7	59	31.2709	30.0201	17.3321	2.99875	4.36192
						2013	3	26	85	16.7	9.7	13.2	61.5	49.9825	27.9902	21.1586	3.84695	4.36483
						2013	3	27	86	15.1	9.2	12.15	66	52.9335	24.9846	20.572	3.61361	3.75604
						2013	3	28	87	14.9	9.5	12.2	81	75.4492	32.594	28.0525	4.93583	4.82261
						2013	3	29	88	20.5	8.8	14.65	60.5	51.7985	48.4834	28.3485	5.39527	7.74634
						2013	3	30	89	22.5	10.9	16.7	58.5	41.9138	38.896	22.8405	4.6216	6.69351
						2013	3	31	90	22.7	14.5	18.6	63.5	51.7067	33.9196	23.6905	5.05758	6.1795
						2013	4	1	91	25.1	15.8	20.45	62	45.0721	33.5336	21.9922	4.93365	6.37055
						2013	4	2	92	21.3	12.8	17.05	62.5	66.465	45.1962	31.0043	6.33713	7.79816
						2013	4	3	93	23.3	9.8	16.55	62	38.5783	41.6645	22.6793	4.56903	7.11514
						2013	4	4	94	20.7	11.4	16.05	58	59.1176	43.9835	28.8455	5.7267	7.38288
						2013	4	5	95	22.9	9.6	16.25	61.5	48.2558	51.3442	28.1576	5.62316	8.61359
						2013	4	6	96	25.7	11.5	18.6	59	50.4536	57.3153	30.4198	6.4942	10.1944
						2013	4	7	97	28.4	12.6	20.5	51.5	45.0473	56.9398	28.6495	6.43553	10.5672
						2013	4	8	98	26.3	13.2	19.75	43.5	52.0672	54.5664	30.1523	6.64046	10.909
						2013	4	9	99	18.4	9.6	14	62	63.5835	44.7628	30.1791	5.62861	7.01176
						2013	4	10	100	18	10.1	14.05	61	67.8627	42.8893	30.5186	5.70089	6.74379
						2013	4	11	101	19.9	9.8	14.85	44	57.0392	46.0877	29.0038	5.554	8.06688
						2013	4	12	102	21	9.3	15.15	45.5	51.6363	48.3316	28.2597	5.46124	8.35914
						2013	4	13	103	24.2	13	18.6	43	52.6465	47.1713	28.1902	6.01822	9.29895
						2013	4	14	104	25.2	13.7	19.45	49	50.0099	46.0091	27.1347	5.92815	8.53865
						2013	4	15	105	23.9	11.2	17.55	49	50.5288	51.3373	28.8112	5.97335	9.05756
						2013	4	16	106	17.3	9.1	13.2	65.5	63.8189	41.8652	29.2399	5.31626	6.37818
						2013	4	17	107	17.1	9.4	13.25	68.5	66.7325	41.1073	29.628	5.39551	6.2808
						2013	4	18	108	18.7	9.7	14.2	57.5	61.1503	44.0282	29.3521	5.50881	6.95247
						2013	4	19	109	13.4	9.4	11.4	71.5	94.2782	30.169	30.169	5.16668	4.31831
						2013	4	20	110	15.4	8.3	11.85	63	71.034	40.3473	30.2842	5.26633	5.80609
						2013	4	21	111	18.6	9.1	13.85	63	60.7436	46.1651	29.9559	5.56063	7.1814
						2013	4	22	112	17.8	9.2	13.5	60	63.1228	43.4285	29.618	5.43711	6.68403
						2013	4	23	113	21	9.7	15.35	48	54.065	48.8747	29.0787	5.65362	8.21894
						2013	4	24	114	23.6	12.1	17.85	53	51.5139	47.3928	27.9507	5.84414	8.33525
						2013	4	25	115	24.4	12.4	18.4	47.5	53.7244	51.5755	29.7771	6.32207	9.49222
						2013	4	26	116	26.4	13.6	20	42.5	54.0979	55.3963	30.9675	6.8654	11.2744
						2013	4	27	117	27.2	16.9	22.05	39.5	58.571	48.2625	30.0761	7.02938	10.6832
						2013	4	28	118	28.9	18.3	23.6	41	56.2532	47.7027	29.3036	7.11523	10.6508
						2013	4	29	119	30.9	17.8	24.35	41	49.8222	52.2137	28.8522	7.13254	11.7564
						2013	4	30	120	32	21	26.5	39	54.7791	48.2056	29.0691	7.55272	11.5206
						2013	5	1	121	32.4	21.7	27.05	36.5	55.9489	47.8923	29.2822	7.70254	11.8896
						2013	5	2	122	32.8	22.5	27.65	49	57.7132	47.5557	29.6356	7.89979	10.12
						2013	5	3	123	32.6	20.2	26.4	44.5	52.6814	52.2599	29.6816	7.69446	11.5881
						2013	5	4	124	31.8	18	24.9	39	49.6425	54.8053	29.5062	7.3894	12.7366
						2013	5	5	125	31.2	18.4	24.8	38	51.317	52.5486	29.3756	7.33946	12.3636
						2013	5	6	126	32.3	19	25.65	35	50.8641	54.1194	29.6795	7.56337	13.3511
						2013	5	7	127	31.1	16.8	23.95	38	49.306	56.4061	29.8324	7.30487	13.0618
						2013	5	8	128	31.5	17.6	24.55	51	49.0734	54.5696	29.2734	7.27101	10.9029
						2013	5	9	129	28	18	23	52	53.4923	42.7938	27.0652	6.47648	8.42162
						2013	5	10	130	26.8	16.6	21.7	48.5	58.5173	47.7501	29.9023	6.92739	9.33131
						2013	5	11	131	22.2	12.3	17.25	48.5	57.0594	45.1911	28.7253	5.90502	8.00786
						2013	5	12	132	18.8	12.6	15.7	66	71.374	35.4015	28.4352	5.58687	5.94369
						2013	5	13	133	21.5	12.7	17.1	53	59.1004	41.6067	28.0512	5.74176	7.21608
						2013	5	14	134	22.1	12.1	17.1	61	57.5389	46.0311	29.1126	5.95902	7.94673
						2013	5	15	135	20.2	11.2	15.7	69	60.6155	43.6432	29.0955	5.7166	7.25028
						2013	5	16	136	25.5	11.8	18.65	53.5	48.1131	52.732	28.4934	6.09129	9.41912
						2013	5	17	137	27.1	19.8	23.45	53	65.5078	38.2566	28.3188	6.8512	7.62807
						2013	5	18	138	30.2	16.3	23.25	55.5	48.502	53.9343	28.9326	6.96576	10.5567
						2013	5	19	139	30.4	16.4	23.4	44	46.2548	51.8054	27.6911	6.69123	11.0538
						2013	5	20	140	29	17.4	23.2	33.5	52.4808	48.7021	28.5989	6.87703	11.8168
						2013	5	21	141	29.5	17.2	23.35	35.5	50.9327	50.1178	28.5805	6.89774	11.8953
						2013	5	22	142	32.6	19.2	25.9	34.5	48.312	51.7905	28.2962	7.25232	12.9193
						2013	5	23	143	33.1	17.9	25.5	35.5	45.3875	55.1912	28.3125	7.19009	13.4964
						2013	5	24	144	35.2	24.8	30	34.5	51.8636	43.1505	26.7608	7.50231	11.42
						2013	5	25	145	31.5	21.7	26.6	37	58.1072	45.556	29.1047	7.57903	11.1984
						2013	5	26	146	31.1	16.6	23.85	35.5	46.8234	54.3151	28.5277	6.96867	12.958
						2013	5	27	147	30.3	16.3	23.3	34.5	47.9159	53.6658	28.6856	6.9147	12.8433
						2013	5	28	148	30.5	17	23.75	36	48.7738	52.6757	28.673	6.98734	12.4866
						2013	5	29	149	31.4	17.3	24.35	31.5	47.4181	53.4876	28.4888	7.0427	13.4791
						2013	5	30	150	33.9	18.8	26.35	30	46.4985	56.1702	28.91	7.48594	14.7973
						2013	5	31	151	34.6	19.7	27.15	32.5	47.4631	56.576	29.3136	7.728	14.643
						2013	6	1	152	30.8	18.1	24.45	44.5	51.0604	51.8774	29.1143	7.21442	11.1834
						2013	6	2	153	34.4	17.4	25.9	40	42.3259	57.5632	27.9223	7.15649	13.3833
						2013	6	3	154	32	19.8	25.9	40	51.7494	50.5074	28.9204	7.41232	11.8003
						2013	6	4	155	29.5	17.6	23.55	38	52.5979	50.0732	29.031	7.04053	11.572
						2013	6	5	156	29	15.7	22.35	39.5	49.8933	53.0864	29.113	6.85553	11.7706
						2013	6	6	157	29.2	14.7	21.95	34	47.134	54.6755	28.717	6.69489	12.843
						2013	6	7	158	29.3	16.7	23	31.5	49.5877	49.9844	28.163	6.73918	12.3531
						2013	6	8	159	29.6	15.8	22.7	37	48.9219	54.0098	29.0779	6.90694	12.4162
						2013	6	9	160	33.3	18.1	25.7	31	46.0138	55.9527	28.7031	7.32296	14.4458
						2013	6	10	161	30.8	17.9	24.35	28.5	51.0543	52.6881	29.3391	7.25292	13.7355
						2013	6	11	162	31.5	17.8	24.65	32	47.6359	52.2089	28.2107	7.02361	13.1556
						2013	6	12	163	33.7	19.5	26.6	31.5	45.8439	52.0787	27.6405	7.19775	13.5751
						2013	6	13	164	30.9	18	24.45	30	48.7097	50.2684	27.9918	6.93626	12.9338
						2013	6	14	165	30.2	14.8	22.5	35.5	44.345	54.633	27.8435	6.58109	12.7359
						2013	6	15	166	29.3	16	22.65	36	47.2433	50.2669	27.5668	6.53992	11.7171
						2013	6	16	167	32.5	17.5	25	32.5	44.1127	52.9353	27.3357	6.86185	13.3264
						2013	6	17	168	32.4	20.2	26.3	34	48.4072	47.2454	27.0526	6.99707	11.9654
						2013	6	18	169	33.9	20.5	27.2	31	44.2351	47.42	25.9083	6.83785	12.5778
						2013	6	19	170	34.3	21.5	27.9	30.5	46.2423	47.3521	26.4706	7.09494	12.7447
						2013	6	20	171	35.6	22.3	28.95	29.5	45.044	47.9268	26.2835	7.20663	13.2044
						2013	6	21	172	35	22.1	28.55	25.5	46.7979	48.2954	26.8931	7.31069	13.8235
						2013	6	22	173	35.3	22.3	28.8	27	45.8605	47.6949	26.4564	7.23077	13.4823
						2013	6	23	174	36.4	22.1	29.25	30	43.4204	49.673	26.2713	7.24953	13.6376
						2013	6	24	175	34.9	20.9	27.9	34	44.0979	49.3896	26.3999	7.07597	12.751
						2013	6	25	176	36.4	19.8	28.1	26	34.3514	45.6187	22.3933	6.02836	12.9485
						2013	6	26	177	36.4	20.8	28.6	27	40.7669	50.8771	25.7626	7.01093	14.3098
						2013	6	27	178	36.4	21.6	29	28.5	41.8093	49.5022	25.735	7.06379	13.7789
						2013	6	28	179	36.4	22.3	29.35	25.5	42.9886	48.4911	25.8275	7.1422	14.0087
						2013	6	29	180	36.4	21.9	29.15	27	41.7915	48.4782	25.462	7.01126	13.7509
						2013	6	30	181	36.4	21.3	28.85	31.5	41.7697	50.4578	25.9699	7.10541	13.5499
						2013	7	1	182	31	19.5	25.25	30.5	47.1578	43.3852	25.5872	6.46046	11.3072
						2013	7	2	183	33.2	20.8	27	29	44.7312	44.3734	25.2024	6.62198	12.0373
						2013	7	3	184	34.7	21.1	27.9	28.5	43.7284	47.5765	25.802	6.91571	13.0887
						2013	7	4	185	35.9	22.1	29	24.5	40.4292	44.6338	24.03	6.59581	13.0242
						2013	7	5	186	36.2	22.2	29.2	24.5	38.6923	43.3354	23.1637	6.3852	12.6919
						2013	7	6	187	36.1	21.8	28.95	28	40.3977	46.215	24.4424	6.70184	12.9638
						2013	7	7	188	35.8	20.8	28.3	25	41.1965	49.4358	25.5286	6.90232	14.1681
						2013	7	8	189	37.1	20.5	28.8	29	38.0022	50.4669	24.7732	6.77074	13.9269
						2013	7	9	190	37.1	21.8	29.45	28	35.6399	43.6232	22.305	6.18119	12.3398
						2013	7	10	191	36.7	22.1	29.4	32	43.574	50.8944	26.6394	7.37452	13.6729
						2013	7	11	192	35.8	22.6	29.2	39	43.652	46.0965	25.3753	6.99483	11.4192
						2013	7	12	193	35.9	23.3	29.6	30	43.0795	43.4241	24.4667	6.80178	12.0395
						2013	7	13	194	37.2	22.5	29.85	28	39.5665	46.5302	24.272	6.78324	13.1841
						2013	7	14	195	36.9	24	30.45	29	41.9235	43.2651	24.092	6.8177	12.2457
						2013	7	15	196	36	24.1	30.05	30.5	45.8684	43.6667	25.3167	7.10488	12.0974
						2013	7	16	197	36.1	21.6	28.85	22.5	39.9484	46.3401	24.339	6.65921	13.7582
						2013	7	17	198	33.9	20.6	27.25	37.5	40.4925	43.0841	23.6277	6.24286	10.645
						2013	7	18	199	32.5	20.6	26.55	39.5	41.9138	39.902	23.134	6.01745	9.56576
						2013	7	19	200	34.3	20.8	27.55	35	39.715	42.8922	23.3475	6.20993	10.9634
						2013	7	20	201	35.5	21.7	28.6	29.5	38.1545	42.1226	22.678	6.17151	11.6235
						2013	7	21	202	36.6	21.9	29.25	28.5	30.914	36.3549	18.9642	5.23313	10.2976
						2013	7	22	203	35.7	22.9	29.3	27	27.0267	27.6753	15.471	4.27372	8.10813
						2013	7	23	204	35.5	22.2	28.85	30	38.0815	40.5188	22.2208	6.07967	11.1733
						2013	7	24	205	35.8	22.5	29.15	29	34.8188	37.0472	20.317	5.59452	10.4136
						2013	7	25	206	35.7	22.8	29.25	24.5	37.5184	38.719	21.5605	5.94959	11.4087
						2013	7	26	207	36.4	22.4	29.4	24	34.3204	38.4389	20.5464	5.68783	11.4094
						2013	7	27	208	35.7	21.8	28.75	27	36.795	40.9161	21.9491	5.99245	11.6395
						2013	7	28	209	35.7	22.4	29.05	20.5	37.2592	39.6438	21.741	5.97389	12.1276
						2013	7	29	210	35.7	22.3	29	25	35.2141	37.7495	20.6247	5.66112	11.047
						2013	7	30	211	36	22.5	29.25	24.5	34.6262	37.3962	20.3559	5.61719	11.0389
						2013	7	31	212	36.8	20.8	28.8	19.5	31.8598	40.7805	20.3903	5.57284	12.5461
						2013	8	1	213	36.7	22.7	29.7	28.5	16.286	18.2403	9.74985	2.71619	5.47365
						2013	8	2	214	36	22.8	29.4	27.5	23.5291	24.8467	13.6777	3.78636	7.30659
						2013	8	3	215	36.6	22.7	29.65	30.5	36.609	40.7092	21.8381	6.07743	11.2649
						2013	8	4	216	36.6	23.1	29.85	52.5	36.2044	39.1008	21.2838	5.94812	8.49853
						2013	8	5	217	36.6	21.7	29.15	29.5	34.267	40.8463	21.1636	5.82765	11.3617
						2013	8	6	218	37	23.5	30.25	40	36.2429	39.1423	21.3064	6.00442	9.76559
						2013	8	7	219	36.6	20.6	28.6	32.5	32.306	41.3516	20.6758	5.62664	11.0422
						2013	8	8	220	36.6	22.7	29.65	28.5	33.1508	36.8636	19.7752	5.50332	10.4818
						2013	8	9	221	37.3	22.5	29.9	43.5	31.1577	36.8907	19.1786	5.3654	8.79426
						2013	8	10	222	36.6	23.9	30.25	38	33.4017	33.9361	19.0454	5.36725	8.74584
						2013	8	11	223	36.6	20.8	28.7	35	30.1562	38.1175	19.179	5.23054	9.94007
						2013	8	12	224	35.5	19.9	27.7	30.5	29.3001	36.5665	18.5162	4.94118	9.93942
						2013	8	13	225	36.6	22.3	29.45	27.5	8.01145	9.1651	4.84729	1.34329	3.0547
						2013	8	14	226	36.6	24.2	30.4	25	32.5675	32.3069	18.3491	5.18716	9.69002
						2013	8	15	227	36.6	24.7	30.65	32	30.3286	28.8728	16.7396	4.75672	8.10171
						2013	8	16	228	36.7	24.9	30.8	37.5	25.8586	24.4105	14.2124	4.05107	6.51114
						2013	8	17	229	37	23.2	30.1	38.5	27.5879	30.4571	16.3975	4.60662	7.84013
						2013	8	18	230	36.6	23	29.8	37.5	3.25281	3.53905	1.91932	0.535824	1.36802
						2013	8	19	231	35.8	23.4	29.6	40.5	10.8766	10.7896	6.12809	1.70362	3.00947
						2013	8	20	232	36	22.5	29.25	42	16.9053	18.2578	9.93826	2.74245	4.64609
						2013	8	21	233	36.6	22.2	29.4	44	11.9343	13.7484	7.24602	2.0059	3.52981
						2013	8	22	234	36.6	23.1	29.85	40.5	10.662	11.5149	6.26794	1.75168	3.18793
						2013	8	23	235	33.4	21.2	27.3	47.5	15.908	15.5262	8.89026	2.35158	3.65036
						2013	8	24	236	33.1	20.7	26.9	48	9.04256	8.97022	5.09474	1.33567	2.26411
						2013	8	25	237	36.3	21.7	29	32.5	11.8503	13.8411	7.24477	1.98856	4.06877
						2013	8	26	238	36.6	22.2	29.4	34.5	15.9244	18.3449	9.66862	2.67654	5.1235
						2013	8	27	239	36.6	22.7	29.65	32	2.85463	3.17435	1.70285	0.473894	1.36237
						2013	8	28	240	36.8	24.2	30.5	32	6.8274	6.88202	3.87758	1.09844	2.34382
						2013	8	29	241	36.6	21.7	29.15	38.5	17.3484	20.6793	10.7145	2.95037	5.42599
						2013	8	30	242	36.6	22.4	29.5	43	8.5535	9.71677	5.15713	1.43066	2.66899
						2013	8	31	243	35	20.9	27.95	44.5	16.394	18.4924	9.8495	2.64285	4.47843
						2013	9	1	244	35.3	19.6	27.45	44.5	10.4369	13.1088	6.61672	1.75602	3.28612
						2013	9	2	245	35.1	20.9	28	47	8.52433	9.68364	5.13954	1.38057	2.47849
						2013	9	3	246	36.6	21.9	29.25	40.5	14.9489	17.5799	9.17037	2.53055	4.57767
						2013	9	4	247	33.6	20.1	26.85	47	15.0692	16.2748	8.85885	2.31989	3.80908
						2013	9	5	248	30.1	19.2	24.65	45	1.67007	1.4563	0.882201	0.219641	0.732275
						2013	9	6	249	30.8	18.9	24.85	46.5	2.28261	2.17304	1.25987	0.315146	0.865304
						2013	9	7	250	34.7	17.7	26.2	47.5	27.8145	37.8277	18.3491	4.73517	8.15025
						2013	9	8	251	34.1	19.4	26.75	44	27.2877	32.0903	16.7396	4.37383	7.37091
						2013	9	9	252	32.3	19.2	25.75	42.5	24.542	25.72	14.2124	3.63013	6.03138
						2013	9	10	253	33.4	19.4	26.4	42.5	27.3902	30.677	16.3975	4.25079	7.17143
						2013	9	11	254	35.4	20.4	27.9	44	3.09729	3.71675	1.91932	0.514437	1.27103
						2013	9	12	255	35.3	23.1	29.2	45	10.9654	10.7023	6.12809	1.68924	2.80694
						2013	9	13	256	36.6	22.7	29.65	45.5	16.6603	18.5263	9.93826	2.76576	4.51682
						2013	9	14	257	36.6	22.1	29.35	38	11.8931	13.796	7.24602	2.00378	3.81775
						2013	9	15	258	31.3	19.6	25.45	42.5	11.4528	10.7198	6.26794	1.58993	2.76616
						2013	9	16	259	36.6	18.7	27.65	49	13.1331	18.8066	8.89026	2.36982	4.25965
						2013	9	17	260	27.7	18.1	22.9	54.5	10.277	7.89274	5.09474	1.21614	1.86985
						2013	9	18	261	36.6	18.2	27.4	34	10.5559	15.5383	7.24477	1.92057	4.33867
						2013	9	19	262	25	16.7	20.85	56.5	20.9752	13.9275	9.66862	2.1917	2.88784
						2013	9	20	263	30.2	17	23.6	43.5	2.92934	3.09339	1.70285	0.413471	1.07365
						2013	9	21	264	27.2	17.9	22.55	52.5	7.94693	5.91252	3.87758	0.91764	1.48979
						2013	9	22	265	29.9	15.2	22.55	45	17.466	20.5401	10.7145	2.53562	4.51385
						2013	9	23	266	27.6	16.2	21.9	50	9.54631	8.70623	5.15713	1.20079	1.98633
						2013	9	24	267	26.4	13.6	20	49	17.2064	17.6193	9.8495	2.1836	3.54124
						2013	9	25	268	26.5	15.8	21.15	39	12.6424	10.8219	6.61672	1.51153	2.70983
						2013	9	26	269	36.6	15.4	26	44.5	6.97648	11.8321	5.13954	1.32028	2.95193
						2013	9	27	270	30.6	15.1	22.85	40	14.558	18.0519	9.17037	2.18633	4.30798
						2013	9	28	271	29.4	15.9	22.65	46	15.0692	16.2748	8.85885	2.10167	3.62063
						2013	9	29	272	30.7	16	23.35	43	1.4381	1.6912	0.882201	0.212915	0.785066
						2013	9	30	273	31.4	18	24.7	38.5	2.15106	2.30594	1.25987	0.314038	0.987141
						2013	10	1	274	30.3	16.2	23.25	39	30.5412	34.4504	18.3491	4.4177	7.96735
						2013	10	2	275	26.1	17.1	21.6	51.5	34.8742	25.1094	16.7396	3.86821	4.97616
						2013	10	3	276	24.5	16.9	20.7	66	32.221	19.5904	14.2124	3.20918	3.897
						2013	10	4	277	22.2	13.5	17.85	56.5	34.7456	24.1829	16.3975	3.42852	4.42561
						2013	10	5	278	21.1	8.1	14.6	44.5	3.32702	3.4601	1.91932	0.364721	0.91532
						2013	10	6	279	19.9	10.9	15.4	45	12.7669	9.19214	6.12809	1.19325	1.89829
						2013	10	7	280	20.9	9.8	15.35	42	18.6436	16.5555	9.93826	1.93224	3.25748
						2013	10	8	281	23.3	10.2	16.75	44	12.5125	13.1131	7.24602	1.4683	2.69948
						2013	10	9	282	27	12.4	19.7	39	10.2525	11.9749	6.26794	1.37855	2.86432
						2013	10	10	283	29	14.5	21.75	43	14.5918	16.9265	8.89026	2.06219	3.83785
						2013	10	11	284	30.9	15.6	23.25	41	8.1406	9.9641	5.09474	1.2266	2.5634
						2013	10	12	285	31.4	19.2	25.3	41.5	12.9636	12.6524	7.24477	1.83134	3.2175
						2013	10	13	286	29.3	19.7	24.5	38	19.5033	14.9786	9.66862	2.39868	3.84453
						2013	10	14	287	27.3	15.7	21.5	39	3.12484	2.89985	1.70285	0.392498	1.05434
						2013	10	15	288	28.9	17.3	23.1	45	7.11561	6.60328	3.87758	0.930148	1.75064
						2013	10	16	289	27.3	14.1	20.7	52	18.4317	19.4639	10.7145	2.41937	3.87427
						2013	10	17	290	28.2	14.7	21.45	46	8.77245	9.47425	5.15713	1.18718	2.23019
						2013	10	18	291	21.2	12.9	17.05	51	21.3676	14.1881	9.8495	2.01319	2.68448
						2013	10	19	292	22.2	11.2	16.7	60.5	12.4688	10.9726	6.61672	1.33884	2.13328
						2013	10	20	293	21.9	11.9	16.9	51.5	10.1579	8.12633	5.13954	1.04598	1.67785
						2013	10	21	294	22.6	11.2	16.9	54.5	16.9752	15.4814	9.17037	1.86631	2.88578
						2013	10	22	295	25	11.6	18.3	41	15.1253	16.2144	8.85885	1.87565	3.51927
						2013	10	23	296	27.9	12.2	20.05	49.5	1.39155	1.74778	0.882201	0.19584	0.685424
						2013	10	24	297	24.3	15.1	19.7	51	2.59604	1.91068	1.25987	0.277092	0.704097
						2013	10	25	298	23.5	15.6	19.55	51.5	40.802	25.7869	18.3491	4.01951	4.88995
						2013	10	26	299	25.8	14.5	20.15	45	31.1234	28.1355	16.7396	3.72585	5.75504
						2013	10	27	300	23.4	13.7	18.55	52	28.5207	22.1321	14.2124	3.02997	4.15168
						2013	10	28	301	25.6	14.5	20.05	47.5	30.7608	27.3156	16.3975	3.6401	5.4008
						2013	10	29	302	25.4	12.6	19	48	3.35292	3.43339	1.91932	0.414251	0.984184
						2013	10	30	303	24.4	13.6	19	50.5	11.6545	10.0695	6.12809	1.32264	2.10645
						2013	10	31	304	24.5	13.4	18.95	49	18.6436	16.5555	9.93826	2.14208	3.27239
						2013	11	1	305	23.7	15.5	19.6	43.5	15.8151	10.3747	7.24602	1.58942	2.39215
						2013	11	2	306	25.6	13.6	19.6	43.5	11.3087	10.8564	6.26794	1.37488	2.48458
						2013	11	3	307	26.6	12	19.3	46	14.5418	16.9848	8.89026	1.93444	3.51738
						2013	11	4	308	25.2	12.1	18.65	46.5	8.79765	9.21993	5.09474	1.08915	2.04035
						2013	11	5	309	17.5	14.3	15.9	61.5	25.3122	6.47992	7.24477	1.43193	1.36703
						2013	11	6	310	20.8	12.2	16.5	59	20.6061	14.177	9.66862	1.94503	2.64145
						2013	11	7	311	20.6	16.2	18.4	66	5.07377	1.78597	1.70285	0.361538	0.661932
						2013	11	8	312	18.9	14.4	16.65	63	11.4244	4.1128	3.87758	0.783462	1.01156
						2013	11	9	313	21.1	13.3	17.2	74.5	23.9776	14.962	10.7145	2.19943	2.82365
						2013	11	10	314	17	11.7	14.35	81	14.0007	5.9363	5.15713	0.972427	1.21652
						2013	11	11	315	17	12.9	14.95	76	30.402	9.97186	9.8495	1.89188	1.86647
						2013	11	12	316	18.7	11.5	15.1	61.5	15.4119	8.87726	6.61672	1.27675	1.70557
						2013	11	13	317	23.1	11.5	17.3	59	9.43139	8.75233	5.13954	1.05803	1.80023
						2013	11	14	318	22.4	11	16.7	59.5	16.9752	15.4814	9.17037	1.85556	2.86962
						2013	11	15	319	20.1	11.7	15.9	62.5	19.1037	12.8377	8.85885	1.75096	2.38119
						2013	11	16	320	19.7	11.2	15.45	62.5	1.8912	1.28602	0.882201	0.172039	0.531016
						2013	11	17	321	19.4	11.3	15.35	68	2.7667	1.79282	1.25987	0.24495	0.608778
						2013	11	18	322	16.7	11.2	13.95	57.5	48.9005	21.5162	18.3491	3.41686	3.52626
						2013	11	19	323	19.4	10.7	15.05	53	35.4704	24.6874	16.7396	3.22514	4.1574
						2013	11	20	324	21.8	13.6	17.7	57.5	31.0198	20.349	14.2124	2.95912	3.76522
						2013	11	21	325	20.3	9.5	14.9	67.5	31.1851	26.9439	16.3975	3.14481	4.48521
						2013	11	22	326	18.3	10.1	14.2	61.5	4.1891	2.74805	1.91932	0.360218	0.729352
						2013	11	23	327	20.3	10.4	15.35	66	12.1727	9.6408	6.12809	1.19145	1.83924
						2013	11	24	328	17.8	12.2	15	77	26.248	11.7591	9.93826	1.91184	2.14661
						2013	11	25	329	15.5	9.3	12.4	73	18.188	9.02122	7.24602	1.28344	1.55882
						2013	11	26	330	15.6	9.4	12.5	71.5	15.7329	7.80352	6.26794	1.11387	1.39409
						2013	11	27	331	16.2	11	13.6	73	24.3665	10.1365	8.89026	1.63724	1.80233
						2013	11	28	332	17.3	9.6	13.45	68	11.4751	7.06867	5.09474	0.933771	1.34225
						2013	11	29	333	15.5	9.3	12.4	54	18.1848	9.01966	7.24477	1.28321	1.5586
						2013	11	30	334	14.9	6.4	10.65	55.5	20.7269	14.0943	9.66862	1.6133	2.08314
						2013	12	1	335	13.6	5.8	9.7	57.5	3.81074	2.3779	1.70285	0.274649	0.543927
						2013	12	2	336	14.4	8.7	11.55	61.5	10.1509	4.6288	3.87758	0.667478	0.906089
						2013	12	3	337	13.7	7.1	10.4	52	26.0664	13.7631	10.7145	1.77211	2.01222
						2013	12	4	338	10.1	5.5	7.8	58.5	15.0283	5.5304	5.15713	0.774312	0.808164
						2013	12	5	339	10.1	5.2	7.65	55.5	27.8097	10.9014	9.8495	1.47018	1.36023
						2013	12	6	340	15.2	2.2	8.7	83	11.4697	11.9285	6.61672	1.02839	1.59526
						2013	12	7	341	8.4	5.5	6.95	60	18.8628	4.37616	5.13954	0.74605	0.634686
						2013	12	8	342	12	3.4	7.7	55	19.5442	13.4464	9.17037	1.3715	1.63372
						2013	12	9	343	6	-0.1	2.95	63.5	22.4178	10.9399	8.85885	1.07811	0.663834
						2013	12	10	344	4.6	-2.3	1.15	84.5	2.09905	1.15868	0.882201	0.0980494	0.0717123
						2013	12	11	345	-0.2	-1.9	-1.05	58.5	6.03922	0.821334	1.25987	0.123768	-0.0679311
						2013	12	12	346	3.7	-2.6	0.55	58.5	45.6904	23.0279	18.3491	1.97478	0.275409
						2013	12	13	347	0.4	-1.9	-0.75	65.5	68.9861	12.6934	16.7396	1.67393	-0.241204
						2013	12	14	348	7.3	0.2	3.75	56.5	33.3363	18.935	14.2124	1.79631	1.30355
						2013	12	15	349	9.9	-0.3	4.8	65	32.0892	26.1848	16.3975	2.17348	2.12489
						2013	12	16	350	8.6	0.7	4.65	67	4.2679	2.69731	1.91932	0.252716	0.351191
						2013	12	17	351	9.9	0.3	5.1	66	12.3615	9.4936	6.12809	0.823055	0.911128
						2013	12	18	352	8.7	1.8	5.25	58.5	23.6465	13.0528	9.93826	1.34354	1.21704
						2013	12	19	353	11	1	6	61	14.3212	11.457	7.24602	1.01145	1.19987
						2013	12	20	354	12	2.1	7.05	60	12.4505	9.8608	6.26794	0.913522	1.18451
						2013	12	21	355	13.3	1.6	7.45	51.5	16.2443	15.2047	8.89026	1.31657	1.77916
						2013	12	22	356	17.2	3.5	10.35	49.5	8.60284	9.42871	5.09474	0.841141	1.46831
						2013	12	23	357	15.4	4.4	9.9	55.5	13.6524	12.0141	7.24477	1.17699	1.73837
						2013	12	24	358	13	3.2	8.1	57	19.3033	15.1338	9.66862	1.4687	1.87225
						2013	12	25	359	10.6	4.8	7.7	59	4.41919	2.05051	1.70285	0.254674	0.435392
						2013	12	26	360	9.3	4.5	6.9	61	11.0617	4.24768	3.87758	0.561728	0.619009
						2013	12	27	361	12.9	6	9.45	61	25.4935	14.0724	10.7145	1.71241	1.93651
						2013	12	28	362	13.4	6.9	10.15	59	12.6424	6.57407	5.15713	0.845391	1.08396
						2013	12	29	363	10.2	4.2	7.2	87.5	25.1315	12.0631	9.8495	1.44418	1.42296
						2013	12	30	364	5.9	4.2	5.05	76.5	31.7174	4.31357	6.61672	0.886741	0.49999
						2013	12	31	365	10.3	5.7	8	81	14.977	5.51155	5.13954	0.7777	0.819645
																	1232.07	2006.42
																	ETo-HS	ETo-TURC (Ousman Couly (2016)

## Sheet: 2014
	KİLİS					year	month	day	DOY	Tmax	Tmin	Tmean	RHmean	Ra	Rs=0.16(Tmax-Tmin)^0.5*Ra	Rs=from meteorological station	ETo-HS	ETo-TURC (Ousman Couly (2016)
	DOY	246					#	#		°C	°C	°C	%	MJ m-2 day-1*(0.408 mm day-1)
	φ (-)	36.71	0.64071			2014	1	1	1	13.2	4.4	8.8	98	13.361	9.40616	6.34163	0.989351	1.31771
	tan(φ)		0.745649			2014	1	2	2	10.9	4.3	7.6	45.5	8.00022	4.22412	3.28847	0.489887	0.700548
	sin(φ)		0.597765			2014	1	3	3	10.7	4.1	7.4	45	2.20225	1.16279	0.905229	0.133791	0.356915
	cos(φ)		0.801671			2014	1	4	4	9.9	2.3	6.1	46	27.0372	16.4386	11.9258	1.67169	1.75544
	dr	0.984766		(1+0.033*cos(2*3.14/365*DOY))		2014	1	5	5	9.9	-0.9	4.5	39	29.8322	25.775	15.6862	2.05159	2.30667
	δ	0.120494		(0.409*sin(2*3.14/365*DOY-1.39))		2014	1	6	6	13.5	2.1	7.8	40.5	27.9453	25.4861	15.0966	2.26667	3.32141
	tan(δ)	0.121081				2014	1	7	7	15.1	2.9	9	69.5	7.2456	7.07171	4.04925	0.636469	1.06505
	sin(δ)	0.120203				2014	1	8	8	14.3	3	8.65	89	31.4441	28.4255	16.9121	2.62357	3.45992
	cos(δ)	0.992749				2014	1	9	9	10.2	4.9	7.55	92.5	46.5398	19.7329	17.1428	2.54876	2.26503
	X	0.991849				2014	1	10	10	13.1	4.9	9	83	35.0426	22.9879	16.0555	2.52363	2.91531		-
	ωs (eq. 25)	1.49314		(acos{(-1*tan(-0.35)*tan(0.409*sin(2*3.14/365*DOY-1.39))))		2014	1	11	11	13.4	2.8	8.1	83.5	27.8706	23.6343	14.5184	2.2054	2.79626
	sin ωs	0.996986				2014	1	12	12	13.7	4.4	9.05	79	31.8735	23.7139	15.5522	2.44909	3.0101
	sin φ*sin δ	-0.0718532		(sin(0.35)*sin(0.409*sin(2*3.14/365*DOY-1.39)))		2014	1	13	13	10.5	6.6	8.55	61.5	43.2674	13.4994	13.6714	2.11281	1.75455
	cos φ*cos δ	0.795859		(cos(0.35)*cos(0.409*sin(2*3.14/365*DOY-1.39))		2014	1	14	14	8.5	6	7.25	69	39.1901	7.83802	9.9144	1.45661	1.00284
	Gsc	0.082				2014	1	15	15	9.6	6.1	7.85	78	36.5501	10.234	10.9406	1.64588	1.31249
						2014	1	16	16	9.4	5.8	7.6	74	19.6014	5.6452	5.95056	0.886462	0.806378
	Ra	25.4105				2014	1	17	17	10.8	6.8	8.8	84	42.5713	13.6228	13.6228	2.12528	1.80103
						2014	1	18	18	16.4	6.6	11.5	83	8.96953	7.03211	4.49265	0.772037	1.22718
						2014	1	19	19	14.8	6.7	10.75	73	31.3992	20.3467	14.2982	2.39417	2.9037
						2014	1	20	20	15.1	5.2	10.15	85	27.4003	21.701	13.7941	2.26122	2.97648
						2014	1	21	21	15.5	7	11.25	84.5	27.4588	18.672	12.8089	2.18235	2.75838
						2014	1	22	22	11.1	7	9.05	92	35.0778	11.5055	11.3644	1.7896	1.58596
						2014	1	23	23	12.4	5	8.7	84	50.6474	29.9833	22.0441	3.42615	3.64986
						2014	1	24	24	14.6	3.7	9.15	91	27.0984	23.6298	14.3145	2.26258	3.02088
						2014	1	25	25	10.6	4.8	7.7	66.5	36.4912	16.9319	14.0612	2.10296	2.00024
						2014	1	26	26	10.3	7.8	9.05	40.5	82.061	16.4122	20.76	3.26918	2.45125
						2014	1	27	27	9.1	6.8	7.95	42	61.2386	11.2679	14.8597	2.24416	1.59838
						2014	1	28	28	12.9	6.9	9.9	39	63.5146	30.487	24.8926	4.04406	4.64618
						2014	1	29	29	11.7	7.4	9.55	37	64.291	22.1161	21.3307	3.42161	3.46114
						2014	1	30	30	15.6	7.8	11.7	25.5	50.3745	31.4337	22.5101	3.89465	6.14783
						2014	1	31	31	14.1	3.6	8.85	28	31.1066	26.1295	16.1275	2.52076	4.26634
						2014	2	1	32	12.9	5.4	9.15	38	57.3061	34.3837	25.1103	3.96897	5.01835
						2014	2	2	33	8.4	3.1	5.75	34	27.7002	11.7449	10.2033	1.40929	1.46012
						2014	2	3	34	6.6	-0.1	3.25	33.5	52.8847	28.3462	21.9022	2.70401	2.0763
						2014	2	4	35	8.1	-0.9	3.6	37.5	25.4953	18.3566	12.2378	1.53597	1.44587
						2014	2	5	36	12.7	-1.6	5.55	59.5	23.8565	27.2918	14.4343	1.97674	2.45992
						2014	2	6	37	12.5	1.4	6.95	61	51.2093	45.4739	27.298	3.96254	4.66863
						2014	2	7	38	12.8	1.7	7.25	44	40.4085	35.8828	21.5404	3.16468	4.16445
						2014	2	8	39	15.1	2.6	8.85	36	48.0389	48.0389	27.1749	4.2475	6.91968
						2014	2	9	40	15.4	3.1	9.25	27	22.2153	21.8599	12.466	1.9777	3.76253
						2014	2	10	41	13.2	4.5	8.85	58	62.4902	43.4932	29.4911	4.60953	5.2435
						2014	2	11	42	18.2	5.7	11.95	58	50.6087	50.6087	28.6286	4.99523	7.24387
						2014	2	12	43	18.1	7	12.55	38	53.3764	47.3982	28.4532	5.06474	8.18656
						2014	2	13	44	16.7	7.6	12.15	45.5	60.4585	44.0138	29.1809	5.12582	6.80712
						2014	2	14	45	17.9	9	13.45	54.5	58.9473	41.9705	28.1371	5.157	6.4573
						2014	2	15	46	12	6.3	9.15	50.5	78.0097	35.5724	29.7993	4.71013	4.42358
						2014	2	16	47	14.5	4	9.25	35.5	56.8798	47.7791	29.4899	4.67852	7.11839
						2014	2	17	48	17.8	7.5	12.65	31	58.9069	48.5393	30.2486	5.40207	9.12958
						2014	2	18	49	20.3	7.5	13.9	38	51.8129	53.0564	29.6595	5.5143	9.6319
						2014	2	19	50	22.7	7.9	15.3	38.5	48.7898	57.7671	30.0317	5.83009	10.909
						2014	2	20	51	21.7	7.8	14.75	62	47.5081	52.829	28.3397	5.41021	8.44092
						2014	2	21	52	21.6	7.8	14.7	75	47.0579	51.952	27.97	5.33143	8.29189
						2014	2	22	53	19.3	12	15.65	73.5	67.0769	39.1729	28.9971	5.68877	6.53138
						2014	2	23	54	19.2	10.2	14.7	63.5	60.9732	43.9007	29.2671	5.57868	7.05655
						2014	2	24	55	19	11.6	15.3	67	65.8092	38.9591	28.6433	5.56056	6.4256
						2014	2	25	56	16.4	8.2	12.3	48	63.7723	41.8346	29.2186	5.15814	6.31025
						2014	2	26	57	15.1	6.7	10.9	56.5	63.0654	42.3799	29.2449	4.92267	5.8017
						2014	2	27	58	14.8	6.4	10.6	61	61.9088	41.6027	28.7086	4.78187	5.60837
						2014	2	28	59	14.9	6.4	10.65	64	61.2267	41.6341	28.5608	4.76563	5.62788
						2014	3	1	60	16.3	6.2	11.25	42	56.3171	45.5042	28.6366	4.87905	7.04589
						2014	3	2	61	16	10	13	60	74.6809	35.8468	29.2688	5.28718	5.46019
						2014	3	3	62	16.9	9	12.95	49	64.4644	40.7415	28.9904	5.22838	6.23984
						2014	3	4	63	16.4	9.7	13.05	63	66.8323	35.8221	27.6786	5.00803	5.46786
						2014	3	5	64	18.2	7.4	12.8	82.5	52.6268	45.4695	27.6719	4.96625	6.78835
						2014	3	6	65	21.2	11.1	16.15	78	53.0012	42.825	26.9505	5.36629	7.21884
						2014	3	7	66	21.7	8.9	15.3	72.5	50.2594	51.4656	28.7701	5.58519	8.3833
						2014	3	8	67	21	13.9	17.45	50	67.4169	38.2928	28.7421	5.94217	6.73192
						2014	3	9	68	22	13.2	17.6	55.5	57.8248	40.7087	27.4458	5.69832	7.16287
						2014	3	10	69	16.2	9.9	13.05	51.5	66.4806	33.5062	26.6984	4.83068	5.13385
						2014	3	11	70	14.7	7.4	11.05	65.5	70.1317	40.9569	30.3176	5.12991	5.66054
						2014	3	12	71	14.2	5.8	10	72	63.7841	42.8629	29.5782	4.82264	5.57416
						2014	3	13	72	12.4	5.7	9.05	66.5	72.4382	38.8269	30.0003	4.7243	4.77307
						2014	3	14	73	12.2	5.7	8.95	52	70.0185	36.4096	28.562	4.48106	4.46001
						2014	3	15	74	18.6	7.2	12.9	45	51.1557	46.654	27.6355	4.97592	7.48569
						2014	3	16	75	14.9	7	10.95	41	61.5885	38.9239	27.697	4.67023	6.05478
						2014	3	17	76	16	6.9	11.45	26.5	58.0261	42.243	28.0068	4.80461	7.94662
						2014	3	18	77	19.1	9.6	14.35	32	58.2025	44.2339	28.7027	5.41218	8.82663
						2014	3	19	78	21.1	10.1	15.6	28	55.1168	48.5028	29.2483	5.72948	10.5086
						2014	3	20	79	21.3	8.9	15.1	48.5	51.6818	51.2684	29.1185	5.61866	8.47584
						2014	3	21	80	21.6	11.8	16.7	61	53.0908	41.6232	26.5921	5.3807	7.1389
						2014	3	22	81	24.1	10.3	17.2	55	46.7776	51.6424	27.8034	5.70733	8.89756
						2014	3	23	82	22.7	12.1	17.4	48.5	54.6473	46.3409	28.467	5.87695	8.23562
						2014	3	24	83	23.3	12.8	18.05	37.5	52.8928	44.4299	27.4228	5.76592	9.28245
						2014	3	25	84	22.4	13.5	17.95	57	57.2903	40.7907	27.3461	5.73377	7.24156
						2014	3	26	85	19.7	10.7	15.2	28	57.4151	41.3389	27.5593	5.33396	8.90567
						2014	3	27	86	22.3	8	15.15	28.5	46.8556	53.6028	28.3498	5.47864	11.3399
						2014	3	28	87	23.5	9.6	16.55	28	47.7222	53.0671	28.4674	5.73512	11.7883
						2014	3	29	88	22.1	12.5	17.3	54.5	54.1485	41.5861	26.8437	5.52608	7.25185
						2014	3	30	89	13.7	3.7	8.7	57.5	49.5814	39.6651	25.0864	3.89899	4.75162
						2014	3	31	90	16.7	1	8.85	56	43.6366	54.8075	27.6643	4.324	6.54501
						2014	4	1	91	15.5	5	10.25	37.5	52.0141	43.6919	26.9672	4.43646	6.79006
						2014	4	2	92	20.2	6.6	13.4	24.5	47.1167	51.263	27.8013	5.0873	10.6466
						2014	4	3	93	21.8	8.4	15.1	63	46.0316	49.3458	26.9605	5.20226	7.99904
						2014	4	4	94	20.6	8.5	14.55	64	48.263	46.7186	26.8613	5.09646	7.45012
						2014	4	5	95	22.9	9.9	16.4	67.5	46.3954	48.2513	26.765	5.3686	8.15079
						2014	4	6	96	25.5	12.5	19	59	45.0077	46.808	25.9644	5.60395	8.47086
						2014	4	7	97	25.1	18.5	21.8	36	62.7203	33.1163	25.781	5.98775	7.75841
						2014	4	8	98	19.4	9.8	14.6	49	53.9154	41.407	26.7281	5.07904	6.74595
						2014	4	9	99	20.3	9.1	14.7	50	47.9213	42.9374	25.66	4.89112	6.90876
						2014	4	10	100	20.1	9	14.55	53.5	47.729	42.3833	25.4427	4.82732	6.78839
						2014	4	11	101	22.2	8.8	15.5	68.5	41.7788	44.7868	24.4697	4.77904	7.38502
						2014	4	12	102	24.5	13.3	18.9	56.5	46.1994	41.3947	24.7381	5.32475	7.51554
						2014	4	13	103	23.1	12.6	17.85	53	40.7984	34.2707	21.1523	4.42268	6.12486
						2014	4	14	104	23.6	10.3	16.95	47	45.9596	48.901	26.8177	5.46569	8.74539
						2014	4	15	105	20.8	11.9	16.35	46	53.2974	37.9477	25.4402	5.09541	6.84298
						2014	4	16	106	20.9	11.7	16.3	52	51.0227	37.5527	24.7615	4.95221	6.39982
						2014	4	17	107	20.7	14.7	17.7	40	64.6107	31.0132	25.3221	5.27226	6.34817
						2014	4	18	108	24.8	15.9	20.35	42	49.0799	34.9449	23.4271	5.24181	7.36452
						2014	4	19	109	25.1	12.7	18.9	35	32.9272	32.6637	18.5518	3.99318	7.29367
						2014	4	20	110	25.9	13.2	19.55	29.5	41.3007	41.9615	23.5494	5.15867	9.99014
						2014	4	21	111	24.6	12.9	18.75	44.5	42.2637	39.5588	23.1302	4.95833	7.73643
						2014	4	22	112	26.1	11.4	18.75	59	38.525	45.3053	23.6331	5.06613	8.16253
						2014	4	23	113	28.9	14.6	21.75	50.5	38.121	43.6104	23.0649	5.35016	8.38463
						2014	4	24	114	30.5	16.6	23.55	61.5	36.9684	41.1089	22.0525	5.34813	8.18089
						2014	4	25	115	28.4	18.9	23.65	60.5	46.2142	35.1228	22.7907	5.54051	7.05888
						2014	4	26	116	25.9	16.6	21.25	57	44.8893	33.3976	21.903	5.01641	6.44896
						2014	4	27	117	27.3	11.7	19.5	55.5	33.129	41.345	20.9358	4.58002	7.61056
						2014	4	28	118	26.3	11.6	18.95	54	33.7827	39.7285	20.724	4.46682	7.23601
						2014	4	29	119	23.8	12.6	18.2	36	40.8134	36.5688	21.854	4.61426	7.8836
						2014	4	30	120	24.6	10.9	17.75	19	36.9969	40.5486	21.9102	4.56828	10.3365
						2014	5	1	121	24.5	11	17.75	35.5	36.4032	39.3154	21.4006	4.46204	8.39778
						2014	5	2	122	24.2	10	17.1	41.5	34.2487	38.9065	20.6494	4.2267	7.59227
						2014	5	3	123	26	11.5	18.75	53	34.5386	40.0647	21.043	4.5109	7.25998
						2014	5	4	124	30.7	13.1	21.9	63.5	32.1992	45.3364	21.6133	5.03245	8.72569
						2014	5	5	125	34	18.2	26.1	50.5	33.6375	42.5179	21.3931	5.50815	8.78156
						2014	5	6	126	26.1	19	22.55	33	47.4392	26.9454	20.2249	4.78627	6.71812
						2014	5	7	127	30.8	13.8	22.3	43.5	29.3263	39.8837	19.3465	4.55002	8.50156
						2014	5	8	128	25.9	16.8	21.35	47.5	33.079	24.0815	15.9659	3.666	4.93541
						2014	5	9	129	23.5	14.3	18.9	48	43.0266	31.6676	20.881	4.49454	6.00108
						2014	5	10	130	25.1	12.1	18.6	50	33.7093	35.0577	19.4465	4.15156	6.37481
						2014	5	11	131	25.9	12.7	19.3	33	35.6606	37.6576	20.7298	4.51064	8.61702
						2014	5	12	132	26.9	13.4	20.15	34.5	33.775	36.4771	19.8556	4.41939	8.37136
						2014	5	13	133	27.9	14	20.95	52.5	14.8964	16.5648	8.88607	2.01953	3.37006
						2014	5	14	134	28.8	15.1	21.95	46.5	31.5254	34.5518	18.6698	4.35257	7.08513
						2014	5	15	135	31.2	14.9	23.05	39	27.9977	36.509	18.0857	4.33308	8.38767
						2014	5	16	136	32.5	16	24.25	31	24.0072	31.6895	15.6029	3.84803	8.22583
						2014	5	17	137	30.4	16.6	23.5	33.5	18.5972	20.5313	11.0537	2.67747	5.28938
						2014	5	18	138	25.5	14.1	19.8	48	17.4921	15.9528	9.44964	2.08387	3.27331
						2014	5	19	139	26.2	13.8	20	41.5	16.2035	16.0739	9.12933	2.02395	3.6083
						2014	5	20	140	28.7	13.8	21.25	59	5.98551	7.13473	3.6967	0.846649	1.67636
						2014	5	21	141	29.4	16.4	22.9	47	13.5708	14.1137	7.82885	1.86879	3.16516
						2014	5	22	142	27.9	17.9	22.9	51	17.7265	14.1812	8.96897	2.14094	3.04774
						2014	5	23	143	29.9	16.1	23	48	12.0656	13.3205	7.17149	1.71608	2.9741
						2014	5	24	144	29.3	16.6	22.95	35.5	1.53912	1.56375	0.877595	0.209744	0.826855
						2014	5	25	145	28.1	14.6	21.35	46	8.76391	9.46502	5.1521	1.183	2.22413
						2014	5	26	146	29.5	16.4	22.95	31.5	4.65622	4.87972	2.69643	0.644443	1.65193
						2014	5	27	147	30.5	15.5	23	56	10.8979	13.0775	6.75321	1.61599	2.84591
						2014	5	28	148	32.6	17	24.8	56	2.10692	2.62943	1.33147	0.332665	0.911634
						2014	5	29	149	33.1	20.8	26.95	59	16.5781	16.3129	9.30268	2.44157	3.665
						2014	5	30	150	34	16.8	25.4	47	15.0881	20.7612	10.012	2.53671	4.6446
						2014	5	31	151	37.3	19.9	28.6	42.5	10.5928	14.7451	7.06975	1.92393	3.79019
						2014	6	1	152	26.2	16	21.1	61.5	43.4474	35.4531	22.2016	5.06525	6.80247
						2014	6	2	153	24.3	15.3	19.8	61	47.6271	34.2915	22.861	5.0414	6.41695
						2014	6	3	154	25.5	15	20.25	54	46.9692	39.4541	24.3516	5.43438	7.39838
						2014	6	4	155	32.1	15	23.55	40.5	36.6027	50.0725	24.2176	5.8732	11.219
						2014	6	5	156	28.2	19	23.6	40.5	50.1608	36.9183	24.3432	5.9108	8.39678
						2014	6	6	157	25.5	16	20.75	49	48.0889	36.5475	23.7152	5.3619	7.05137
						2014	6	7	158	27.5	15	21.25	47	43.9546	43.9546	24.8645	5.69467	8.72603
						2014	6	8	159	29.6	15.5	22.55	36.5	44.0304	49.6663	26.4535	6.26029	11.4934
						2014	6	9	160	32.1	18	25.05	34.5	40.6226	45.8223	24.406	6.13361	11.347
						2014	6	10	161	36.1	18.9	27.5	35	35.739	49.1768	23.7152	6.30075	12.4871
						2014	6	11	162	31.1	17.6	24.35	40.5	43.7697	47.2712	25.7312	6.36101	10.754
						2014	6	12	163	29.8	18.2	24	39.5	47.0225	43.6368	25.6244	6.28201	10.0318
						2014	6	13	164	31.8	17.4	24.6	32.5	40.011	46.0927	24.293	6.04108	11.5985
						2014	6	14	165	33.9	19.7	26.8	29.5	40.521	46.0318	24.4311	6.39067	12.3655
						2014	6	15	166	33.4	19.9	26.65	30.5	41.9215	45.2752	24.6447	6.42485	12.0124
						2014	6	16	167	33.2	18.5	25.85	53.5	38.7816	45.6071	23.7905	6.09055	9.3567
						2014	6	17	168	35.1	18.6	26.85	45	37.9194	50.0536	24.6447	6.45376	11.1115
						2014	6	18	169	36.4	22.6	29.5	36	40.8927	45.1455	24.3055	6.74271	11.6486
						2014	6	19	170	36.3	22.9	29.6	27	36.5016	39.1297	21.3788	5.94333	11.267
						2014	6	20	171	34.4	21.5	27.95	24	43.5847	44.9795	25.0466	6.72061	13.0225
						2014	6	21	172	28.7	18.5	23.6	18.5	45.5245	37.148	23.263	5.64851	10.7835
						2014	6	22	173	33.4	17.6	25.5	21	38.296	48.4062	24.3558	6.18526	13.9393
						2014	6	23	174	34.2	20.7	27.45	16.5	40.554	43.7983	23.8408	6.32713	13.601
						2014	6	24	175	35.6	21.5	28.55	20	40.2253	45.3742	24.1674	6.56972	13.7799
						2014	6	25	176	36.4	22.1	29.25	24	40.5451	46.3836	24.5316	6.76946	13.6224
						2014	6	26	177	36.9	23.9	30.4	44	38.5395	40.0811	22.233	6.2851	9.50407
						2014	6	27	178	36.6	25.9	31.25	42.5	46.1281	39.4857	24.1422	6.9452	9.64146
						2014	6	28	179	36.4	27.7	32.05	30	49.9851	34.7896	23.5896	6.89688	10.0129
						2014	6	29	180	37	23.2	30.1	29	42.4354	46.8487	25.2225	7.08584	13.1628
						2014	6	30	181	36.8	22.7	29.75	53	41.3961	46.6948	24.8708	6.93598	10.054
						2014	7	1	182	36.1	20.4	28.25	48.5	37.8927	47.5933	24.0229	6.48819	10.2757
						2014	7	2	183	39	21.8	30.4	42	36.5719	50.3229	24.2679	6.86035	12.1231
						2014	7	3	184	39	25.7	32.35	25.5	40.7717	43.381	23.7905	6.9975	13.0012
						2014	7	4	185	39	25.3	32.15	28.5	40.469	44.354	23.9664	7.02112	12.8326
						2014	7	5	186	35.4	21.2	28.3	46.5	37.9168	43.0735	22.861	6.18108	9.60808
						2014	7	6	187	34.9	21.4	28.15	49	38.2891	41.3522	22.5093	6.06619	8.91111
						2014	7	7	188	36	22.6	29.3	46	38.1744	40.9229	22.3586	6.17637	9.32305
						2014	7	8	189	39	23.3	31.15	54.5	31.5822	39.6673	20.0222	5.74822	8.73736
						2014	7	9	190	39	23.6	31.3	40.5	25.6967	31.6584	16.1346	4.64631	8.03243
						2014	7	10	191	39	22.4	30.7	47.5	37.0728	49.2327	24.1674	6.87447	11.0696
						2014	7	11	192	39	21.1	30.05	65.5	36.9166	52.8646	24.9901	7.01323	11.3636
						2014	7	12	193	39	23	31	53	37.84	48.4352	24.2176	6.93137	10.5554
						2014	7	13	194	33.5	20.6	27.05	41.5	40.5246	41.8214	23.2881	6.12582	9.82001
						2014	7	14	195	36.2	22.7	29.45	52	40.0839	43.2906	23.5644	6.53021	9.32064
						2014	7	15	196	36.1	22.6	29.35	57	42.1885	45.5636	24.8017	6.85853	9.77625
						2014	7	16	197	39	20.5	29.75	45	35.4643	52.4871	24.406	6.80637	12.0512
						2014	7	17	198	35	20	27.5	39.5	38.1486	45.7783	23.6398	6.28073	11.0421
						2014	7	18	199	35.6	21.1	28.35	49	40.5119	46.9938	24.6824	6.68077	10.0931
						2014	7	19	200	33.5	21.6	27.55	50.5	44.6736	42.5293	24.6572	6.55828	8.95584
						2014	7	20	201	33.4	21.2	27.3	53.5	43.9186	42.8646	24.5442	6.49222	8.99411
						2014	7	21	202	34.7	22.4	28.55	58.5	44.1874	43.4804	24.7954	6.74045	9.26111
						2014	7	22	203	35.2	22.8	29	62.5	39.8733	39.5543	22.4653	6.16633	8.50869
						2014	7	23	204	39	21.7	30.35	43	36.7114	50.8086	24.4311	6.89935	12.072
						2014	7	24	205	39	22.4	30.7	39	36.6874	48.7209	23.9161	6.80301	12.2441
						2014	7	25	206	34.2	20.7	27.45	48.5	38.9088	42.0215	22.8736	6.07045	9.03204
						2014	7	26	207	32.9	20.4	26.65	50.5	41.0347	41.0347	23.2127	6.05154	8.55401
						2014	7	27	208	32.2	19.2	25.7	51	38.7137	40.2622	22.3335	5.69788	8.29042
						2014	7	28	209	39	22.5	30.75	52.5	35.3296	46.635	22.9615	6.53819	10.1524
						2014	7	29	210	39	23.7	31.35	59	35.1635	43.0402	22.0069	6.34381	9.46273
						2014	7	30	211	39	23	31	54.5	35.3867	45.295	22.6475	6.48198	9.89934
						2014	7	31	212	39	22.2	30.6	55	34.3136	46.1175	22.503	6.38785	10.0284
						2014	8	1	213	37.8	22.3	30.05	44.5	36.9699	45.8427	23.2881	6.53558	10.6903
						2014	8	2	214	36	21.5	28.75	45	38.1822	44.2914	23.263	6.35116	10.1234
						2014	8	3	215	33.6	20.4	27	58.5	37.9439	40.0687	22.0571	5.79555	8.40163
						2014	8	4	216	34.6	22	28.3	45.5	40.4292	40.7526	22.9615	6.20825	9.23835
						2014	8	5	217	33.6	22.1	27.85	46.5	40.5592	37.3145	22.0069	5.89206	8.33625
						2014	8	6	218	35.2	21	28.1	47	36.6668	41.6535	22.1074	5.95138	9.21995
						2014	8	7	219	35.7	22.9	29.3	50	37.8739	38.7829	21.6803	5.98899	8.38032
						2014	8	8	220	33.7	19.9	26.8	44	35.863	39.5927	21.316	5.57582	8.99481
						2014	8	9	221	37.8	21.6	29.7	53	34.2313	44.3638	22.0446	6.14134	9.56824
						2014	8	10	222	36	23	29.5	50	37.4508	38.9488	21.6049	5.99352	8.43371
						2014	8	11	223	37.8	22.7	30.25	47	36.4462	44.027	22.66	6.3859	9.96677
						2014	8	12	224	37.8	22.7	30.25	47	33.5572	40.5371	20.8638	5.8797	9.21253
						2014	8	13	225	38	23.6	30.8	51.5	37.487	43.1851	22.7605	6.48764	9.43857
						2014	8	14	226	37.8	22.3	30.05	54.5	33.4803	41.5155	21.0899	5.91868	9.01681
						2014	8	15	227	37.8	22.1	29.95	48.5	34.9307	43.8729	22.145	6.2018	9.69715
						2014	8	16	228	37.8	22.7	30.25	55.5	35.335	42.6847	21.9692	6.19121	9.27901
						2014	8	17	229	37.8	23.7	30.75	44.5	37.4865	42.2848	22.5219	6.41301	9.97243
						2014	8	18	230	37.8	22.8	30.3	31.5	35.2905	42.3486	21.8687	6.1693	11.6496
						2014	8	19	231	34.9	23.8	29.35	34	42.1318	37.4131	22.4591	6.21071	9.95651
						2014	8	20	232	34.2	20.6	27.4	26.5	37.3604	40.6482	22.0446	5.84397	11.436
						2014	8	21	233	36.2	17.4	26.8	29	29.5854	44.4964	20.5247	5.36882	12.0371
						2014	8	22	234	37.8	22.9	30.35	58.5	33.2732	39.6616	20.5498	5.80326	8.66197
						2014	8	23	235	37.8	26	31.9	57	37.732	35.619	20.7382	6.04499	7.95106
						2014	8	24	236	37.8	24.3	31.05	54	34.9773	37.7755	20.5624	5.89122	8.33279
						2014	8	25	237	37.8	24.3	31.05	45.5	33.1184	35.7678	19.4695	5.57813	8.42186
						2014	8	26	238	37.8	27.6	32.7	38	41.4932	33.8584	21.203	6.27995	8.94925
						2014	8	27	239	37.8	22.5	30.15	54	33.4375	40.9275	20.9266	5.88513	8.90505
						2014	8	28	240	37.8	21.8	29.8	57	32.9236	42.1422	21.0711	5.8825	9.12091
						2014	8	29	241	37.8	21.1	29.45	56.5	32.6776	43.6573	21.3663	5.92104	9.39595
						2014	8	30	242	37.8	23.6	30.7	58	35.8334	40.7068	21.6049	6.14557	8.91241
						2014	8	31	243	37.8	25	31.4	51.5	37.0839	37.974	21.2281	6.12554	8.4048
						2014	9	1	244	37.8	22	29.9	57.5	32.5684	41.1665	20.7131	5.7947	8.92971
						2014	9	2	245	35.1	23.2	29.15	55	36.458	34.708	20.1227	5.54103	7.53172
						2014	9	3	246	34	20.3	27.15	59	32.3031	35.4042	19.1304	5.04338	7.48683
						2014	9	4	247	34.2	20.5	27.35	58.5	31.5607	34.5905	18.6908	4.9494	7.34347
						2014	9	5	248	36.9	21.3	29.1	58	30.769	38.3997	19.4444	5.34855	8.28248
						2014	9	6	249	32.1	19.5	25.8	56	32.0249	32.2811	18.1883	4.65101	6.73774
						2014	9	7	250	32	19.1	25.55	52.5	33.6066	34.682	19.3125	4.91017	7.18256
						2014	9	8	251	31.6	18.9	25.25	42.5	32.1188	32.6327	18.3139	4.62405	7.4761
						2014	9	9	252	33	19.2	26.1	54	34.4048	37.9829	20.4493	5.26515	7.8888
						2014	9	10	253	31.9	19	25.45	56.5	34.5902	35.6971	19.8778	5.04222	7.37012
						2014	9	11	254	31.6	18.9	25.25	49	32.7577	33.2818	18.6782	4.71603	6.9771
						2014	9	12	255	33.4	19.8	26.6	59.5	35.6574	38.7952	21.0397	5.47886	8.10432
						2014	9	13	256	35	21.4	28.2	47.5	35.551	38.6794	20.9769	5.65935	8.5448
						2014	9	14	257	36.9	20	28.45	56.5	31.0514	41.9815	20.4242	5.54019	8.94566
						2014	9	15	258	32.8	19.5	26.15	50.5	35.0025	37.2427	20.4242	5.26468	7.74848
						2014	9	16	259	31.8	19.6	25.7	30	35.6923	34.8357	19.9469	5.08899	9.29338
						2014	9	17	260	29.8	17.7	23.75	33	36.7197	35.5447	20.4367	4.98025	8.88716
						2014	9	18	261	28.1	18	23.05	45	36.5599	29.5404	18.5903	4.45396	6.36423
						2014	9	19	262	29.8	17.2	23.5	60.5	31.7595	32.0136	18.0376	4.36915	6.4531
						2014	9	20	263	30.5	16.9	23.7	68.5	30.3567	33.0281	17.912	4.35973	6.66699
						2014	9	21	264	29.7	16.4	23.05	53	31.0416	33.0282	18.113	4.3396	6.59494
						2014	9	22	265	30.1	17.8	23.95	62.5	31.6968	31.1896	17.7864	4.35524	6.34363
						2014	9	23	266	30.7	19	24.85	73	34.8404	32.6106	19.0676	4.76961	6.70806
						2014	9	24	267	30.4	19.6	25	65.5	34.1608	29.515	17.9622	4.50891	6.12346
						2014	9	25	268	28.2	18.7	23.45	43.5	33.6087	25.5426	16.5742	4.00983	5.70944
						2014	9	26	269	36.9	17.2	27.05	27.5	23.7723	37.4651	16.882	4.44073	10.4234
						2014	9	27	270	28.3	17.6	22.95	34	33.6841	28.8336	17.6294	4.2134	7.12234
						2014	9	28	271	22.3	15.8	19.05	40.5	43.4793	22.6092	17.7361	3.83323	4.8651
						2014	9	29	272	23.7	14.9	19.3	48	35.2506	24.8165	16.7313	3.64058	4.82743
						2014	9	30	273	25.2	15.3	20.25	55	32.9851	26.1242	16.6056	3.70577	5.02453
						2014	10	1	274	27.4	14.1	20.75	55.5	29.2333	31.1043	17.0578	3.8567	5.97264
						2014	10	2	275	29.2	17.2	23.2	51	31.5013	30.2412	17.4598	4.19847	6.08708
						2014	10	3	276	29.8	17.5	23.65	32	25.2723	24.868	14.1814	3.44755	6.42859
						2014	10	4	277	27.4	16.4	21.9	29	26.7004	23.4963	14.1688	3.29907	6.1197
						2014	10	5	278	28.1	15.3	21.7	27.5	28.4822	29.1658	16.3042	3.77715	7.57059
						2014	10	6	279	28.8	16.1	22.45	38	21.9413	22.2923	12.5108	2.95337	5.30783
						2014	10	7	280	31.4	17.4	24.4	66	26.7936	30.0088	16.0404	3.97005	6.16232
						2014	10	8	281	31	19	25	54	23.1161	22.1914	12.8122	3.21615	4.70452
						2014	10	9	282	29.7	19.8	24.75	74.5	31.7625	25.1559	15.9902	3.99043	5.25898
						2014	10	10	283	30.8	21	25.9	75.5	31.2972	24.537	15.6761	4.0178	5.2271
						2014	10	11	284	26.5	18.8	22.65	73	33.6388	20.7215	14.935	3.54318	4.25421
						2014	10	12	285	23.9	15.9	19.9	85	24.9805	15.9875	11.3049	2.49963	3.19543
						2014	10	13	286	25.4	16.6	21	71.5	25.5117	17.9603	12.1088	2.7555	3.62576
						2014	10	14	287	21.5	14.7	18.1	65.5	34.5313	18.785	14.4075	3.03354	3.53867
						2014	10	15	288	21.7	13.8	17.75	29	29.7189	18.7823	13.3649	2.78659	4.55893
						2014	10	16	289	19.2	13.6	16.4	34	32.5446	14.58	12.3223	2.47165	3.31598
						2014	10	17	290	18.9	12.2	15.55	47	32.0281	17.167	13.2644	2.59449	3.1688
						2014	10	18	291	23.3	12.3	17.8	49	24.7594	21.7882	13.1388	2.7433	4.07446
						2014	10	19	292	22.1	13.8	17.95	53.5	29.5934	19.65	13.6412	2.86021	3.67139
						2014	10	20	293	20	10	15	56	27.7057	22.1645	14.0181	2.69669	3.75945
						2014	10	21	294	22.4	11	16.7	50	14.3578	13.0943	7.75642	1.56945	2.47979
						2014	10	22	295	21.4	10.3	15.85	44	21.655	19.2296	11.5436	2.27821	3.68664
						2014	10	23	296	21.3	13.9	17.6	43	31.5145	18.6566	13.7166	2.84786	3.81941
						2014	10	24	297	23.7	12.5	18.1	36.5	24.0916	21.5861	12.9001	2.71617	4.78752
						2014	10	25	298	24.5	13.5	19	61.5	24.0966	21.205	12.7871	2.75986	4.03552
						2014	10	26	299	24.9	14.2	19.55	62.5	23.8081	20.3797	12.4605	2.72957	3.94146
						2014	10	27	300	24.5	15.7	20.1	60	10.9563	7.71322	5.20025	1.15593	1.74028
						2014	10	28	301	23.6	16.8	20.2	60.5	25.4394	13.839	10.614	2.36555	2.83374
						2014	10	29	302	24.9	17.2	21.05	38	9.50601	5.8557	4.2205	0.961662	1.68483
						2014	10	30	303	18.5	14.5	16.5	35.5	31.481	10.0739	10.0739	2.02657	2.38434
						2014	10	31	304	20.2	10.8	15.5	35	23.8903	17.9655	11.7194	2.28885	3.83662
						2014	11	1	305	20.4	10.5	15.45	33.5	33.8834	26.8356	17.0578	3.32647	5.62216
						2014	11	2	306	19.2	9.6	14.4	27.5	21.2837	16.3459	10.5512	1.99263	3.69901
						2014	11	3	307	14.5	7	10.75	27	27.0324	16.2195	11.845	1.9834	3.14814
						2014	11	4	308	17.5	6.6	12.05	21.5	16.7641	14.6183	8.8555	1.55034	3.24677
						2014	11	5	309	16.8	5.4	11.1	21.5	20.5776	18.7668	11.1165	1.88423	3.86928
						2014	11	6	310	19.3	5.9	12.6	26	1.75859	1.88521	1.03	0.183645	0.755463
						2014	11	7	311	21.2	8.3	14.75	27.5	6.55738	6.76722	3.7683	0.71939	1.7989
						2014	11	8	312	20.2	8.9	14.55	29.5	13.849	12.5195	7.44867	1.41326	2.88306
						2014	11	9	313	19.3	10.6	14.95	26.5	13.8936	9.66995	6.55684	1.25943	2.43067
						2014	11	10	314	19.8	11	15.4	32	17.2548	12.1474	8.18977	1.5947	2.81076
						2014	11	11	315	22.1	9.8	15.95	50	14.6844	14.4494	8.24002	1.63106	2.6423
						2014	11	12	316	21.5	10	15.75	72.5	20.0018	18.4017	10.8527	2.13549	3.25367
						2014	11	13	317	19.6	11.7	15.65	61	24.4957	15.4813	11.016	2.16117	2.78131
						2014	11	14	318	18.8	12	15.4	58	24.6867	13.4296	10.3	2.0056	2.43719
						2014	11	15	319	17.6	12.5	15.05	72	11.889	4.85071	4.29586	0.827663	1.0776
						2014	11	16	320	17.7	12.8	15.25	88.5	24.4003	9.56491	8.64197	1.67514	1.82144
						2014	11	17	321	15.1	11.6	13.35	73.5	7.76322	2.1737	2.32378	0.424543	0.62241
						2014	11	18	322	20	8.1	14.05	70.5	15.5208	14.7758	8.5666	1.60024	2.52871
						2014	11	19	323	19.6	9.3	14.45	63.5	22.309	18.3826	11.4556	2.16679	3.11399
						2014	11	20	324	18.3	10.8	14.55	78	18.0885	10.8531	7.92599	1.50382	1.97563
						2014	11	21	325	14.2	7	10.6	89.5	2.10654	1.21337	0.904392	0.150641	0.424018
						2014	11	22	326	14.7	6.3	10.5	97.5	17.4984	11.7589	8.11441	1.34683	1.76777
						2014	11	23	327	13.9	6.5	10.2	99.5	26.2621	15.5472	11.4305	1.87712	2.21305
						2014	11	24	328	12.6	7.7	10.15	86.5	31.919	12.5122	11.3049	1.85318	1.82688
						2014	11	25	329	11.3	6.4	8.85	83.5	5.10703	2.00196	1.80878	0.282717	0.470704
						2014	11	26	330	10.2	7.1	8.65	75	18.0138	4.46742	5.07464	0.787226	0.743497
						2014	11	27	331	15.3	4.7	10	74	16.9997	14.4157	8.8555	1.44386	2.04671
						2014	11	28	332	14	5.1	9.55	76	22.1049	15.7387	10.5512	1.6925	2.14997
						2014	11	29	333	13.2	5	9.1	82.5	21.9325	14.3877	10.0488	1.58538	1.92878
						2014	11	30	334	13.1	5.1	9.1	92.5	20.4285	13.0743	9.2449	1.45855	1.77504
						2014	12	1	335	11.8	7.7	9.75	87	24.9688	8.18978	8.08928	1.30707	1.25538
						2014	12	2	336	10.8	8.1	9.45	84	38.0308	8.21465	9.99856	1.59798	1.23466
						2014	12	3	337	12	9.7	10.85	86	36.7017	6.75312	8.90575	1.49645	1.15063
						2014	12	4	338	13.3	10.3	11.8	89.5	31.5466	7.57119	8.74246	1.51773	1.31868
						2014	12	5	339	13	10.2	11.6	71.5	34.1083	7.64025	9.13185	1.57461	1.31541
						2014	12	6	340	14.5	9.6	12.05	66	12.7676	5.00489	4.52196	0.791661	0.979777
						2014	12	7	341	16	11.1	13.55	69	21.634	8.48051	7.66221	1.40883	1.55522
						2014	12	8	342	15.2	10.9	13.05	75	19.0053	6.53781	6.30562	1.14091	1.24434
						2014	12	9	343	13.6	9.7	11.65	93.5	29.0993	9.07899	9.19465	1.58814	1.51358
						2014	12	10	344	12.3	7.6	9.95	87	27.0143	10.1574	9.37051	1.52508	1.51411
						2014	12	11	345	13.8	9.2	11.5	68.5	27.6724	10.1834	9.49612	1.63186	1.65113
						2014	12	12	346	12.9	9.5	11.2	83.5	34.1459	9.2877	10.0739	1.71342	1.50776
						2014	12	13	347	11	8.9	9.95	52	43.5563	7.31745	10.099	1.64366	1.16302
						2014	12	14	348	11.3	8.8	10.05	61.5	37.8346	7.56692	9.57148	1.56341	1.20104
						2014	12	15	349	15.2	8	11.6	88.5	13.7218	7.90375	5.89111	1.01581	1.35104
						2014	12	16	350	15.1	6.2	10.65	67.5	21.7628	15.4951	10.3879	1.73333	2.26344
						2014	12	17	351	13.2	6.2	9.7	77	22.9072	12.828	9.69709	1.56402	1.81614
						2014	12	18	352	12.3	8	10.15	95.5	22.4126	7.70993	7.43611	1.21898	1.22606
						2014	12	19	353	9.1	7.7	8.4	98	31.9806	3.58183	6.0544	0.930338	0.631173
						2014	12	20	354	10	6.5	8.25	94.5	5.87487	1.64496	1.75854	0.268675	0.410846
						2014	12	21	355	14.4	5.5	9.95	85.5	15.4208	10.9796	7.36075	1.19799	1.61576
						2014	12	22	356	7.8	4.1	5.95	85.5	27.6715	8.19077	8.51636	1.18628	0.905149
						2014	12	23	357	9.8	3.3	6.55	84.5	5.75823	2.99428	2.34891	0.335454	0.479055
						2014	12	24	358	13	3.2	8.1	67.5	3.36044	2.63458	1.68317	0.25568	0.513568
						2014	12	25	359	9.6	4.7	7.15	57.5	8.0152	3.14196	2.83879	0.415405	0.52355
						2014	12	26	360	11	5.1	8.05	60.5	25.7918	12.1737	10.0237	1.51969	1.54426
						2014	12	27	361	9.5	5.5	7.5	59.5	28.9296	9.25746	9.25746	1.37366	1.17257
						2014	12	28	362	8.2	5.6	6.9	46.5	37.0999	7.71678	9.57148	1.38658	1.00573
						2014	12	29	363	8.4	6.8	7.6	46	35.4389	4.53618	7.17233	1.06847	0.730237
						2014	12	30	364	10.6	7.6	9.1	53.5	32.9517	7.90841	9.13185	1.44072	1.17035
						2014	12	31	365	12.5	7.3	9.9	52	25.1663	10.4692	9.18209	1.49173	1.54796
																	1312.95	2022.5
																	ETo-HS	ETo-TURC (Ousman Couly (2016)

## Sheet: 2015
	KİLİS					year	month	day	DOY	Tmax	Tmin	Tmean	RHmean	Ra	Rs=0.16(Tmax-Tmin)^0.5*Ra	Rs=from meteorological station	ETo-HS	ETo-TURC (Ousman Couly (2016)
	DOY	246					#	#		°C	°C	°C	%	MJ m-2 day-1*(0.408 mm day-1)
	φ (-)	36.71	0.64071			2015	1	1	1	12.4	6.8	9.6	82	30.7112	13.7586	11.6281	1.86865	1.91729
	tan(φ)		0.745649			2015	1	2	2	12.4	6.3	9.35	79	26.4462	12.9057	10.4508	1.66412	1.78501
	sin(φ)		0.597765			2015	1	3	3	10.7	5.4	8.05	84	18.3543	7.78221	6.76075	1.025	1.06881
	cos(φ)		0.801671			2015	1	4	4	10.6	1.9	6.25	72.5	5.18837	3.6111	2.44856	0.345377	0.519807
	dr	0.984766		(1+0.033*cos(2*3.14/365*DOY))		2015	1	5	5	8.9	5.8	7.35	99	42.6594	10.5795	12.0175	1.77264	1.29161
	δ	0.120494		(0.409*sin(2*3.14/365*DOY-1.39))		2015	1	6	6	8.9	5.5	7.2	92	5.15879	1.40319	1.52197	0.22316	0.351207
	tan(δ)	0.121081				2015	1	7	7	5.7	1	3.35	97.5	36.8375	13.8509	12.7779	1.58503	0.902159
	sin(δ)	0.120203				2015	1	8	8	3.3	-2.5	0.4	69.5	31.6341	14.6782	12.1896	1.30116	0.135017
	cos(δ)	0.992749				2015	1	9	9	1.3	-4.5	-1.6	48	18.2733	8.47882	7.04128	0.669013	-0.402381
	X	0.991849				2015	1	10	10	2.6	-2.9	-0.15	67.5	32.4944	14.2975	12.193	1.26218	-0.0513144		-
	ωs (eq. 25)	1.49314		(acos{(-1*tan(-0.35)*tan(0.409*sin(2*3.14/365*DOY-1.39))))		2015	1	11	11	2.4	-2.3	0.05	82	43.0225	16.1765	14.9233	1.56232	0.0188127
	sin ωs	0.996986				2015	1	12	12	0.6	-3.5	-1.45	89.5	19.6197	6.43525	6.35628	0.609522	-0.282812
	sin φ*sin δ	-0.0718532		(sin(0.35)*sin(0.409*sin(2*3.14/365*DOY-1.39)))		2015	1	13	13	3.7	0.3	2	78.5	15.2748	4.15476	4.50647	0.523323	0.22775
	cos φ*cos δ	0.795859		(cos(0.35)*cos(0.409*sin(2*3.14/365*DOY-1.39))		2015	1	14	14	8.7	1.4	5.05	66	16.4469	9.60501	7.10994	0.952841	0.913144
	Gsc	0.082				2015	1	15	15	4.4	0.3	2.35	83.5	23.0509	7.56071	7.46793	0.882558	0.405218
						2015	1	16	16	9.3	-0.4	4.45	78	10.476	8.12935	5.22035	0.681236	0.724812
	Ra	25.4105				2015	1	17	17	9.7	1.2	5.45	83.5	14.1019	9.58929	6.5782	0.897011	0.964897
						2015	1	18	18	11.6	1.5	6.55	67	28.7193	23.2052	14.6034	2.08555	2.38338
						2015	1	19	19	13.6	2.7	8.15	60	31.033	27.0608	16.3929	2.49495	3.1814
						2015	1	20	20	15.5	3.5	9.5	61.5	36.1253	34.6803	20.0227	3.20592	4.41993
						2015	1	21	21	14.1	4.8	9.45	75.5	35.2425	26.2204	17.196	2.74829	3.39204
						2015	1	22	22	15.1	4.2	9.65	65	4.74705	4.13943	2.50759	0.403708	0.755998
						2015	1	23	23	14.3	5.6	9.95	58	8.18357	5.69576	3.86209	0.628569	0.962532
						2015	1	24	24	13.2	5.6	9.4	51.5	50.2414	30.5468	22.161	3.53529	3.89769
						2015	1	25	25	14.1	6.8	10.45	46	48.6735	28.4253	21.0413	3.48626	4.10621
						2015	1	26	26	14.5	7.1	10.8	48.5	34.361	20.3417	14.9555	2.50863	2.97329
						2015	1	27	27	14	5	9.5	60	36.4679	26.2569	17.5046	2.80274	3.40741
						2015	1	28	28	11.9	5.6	8.75	64.5	50.0713	25.2359	20.1085	3.13121	3.12091
						2015	1	29	29	11.4	3.4	7.4	77.5	9.8266	6.28903	4.44701	0.65726	0.858102
						2015	1	30	30	8.6	5.5	7.05	85	41.4079	10.2692	11.665	1.70012	1.22499
						2015	1	31	31	6.7	4.8	5.75	97.5	73.5604	11.1812	16.2234	2.24078	1.14004
						2015	2	1	32	12.3	4.1	8.2	81.5	61.8057	40.5445	28.3175	4.31814	4.67142
						2015	2	2	33	13.5	6.9	10.2	63.5	55.4841	29.2956	22.8066	3.7453	3.93814
						2015	2	3	34	15.4	5.9	10.65	63	32.1509	24.4347	15.8553	2.64561	3.41409
						2015	2	4	35	12.2	5.9	9.05	78	73.8757	37.2334	29.6682	4.67201	4.58718
						2015	2	5	36	13.7	4.7	9.2	77	63.6188	45.8056	30.537	4.83569	5.64455
						2015	2	6	37	13.6	6.5	10.05	61.5	69.6817	39.5792	29.7076	4.85245	5.18245
						2015	2	7	38	14.9	8.4	11.65	50.5	68.4234	35.5802	27.9114	4.82097	5.10491
						2015	2	8	39	11.5	6.3	8.9	71.5	80.5564	33.5114	29.3915	4.60257	4.10981
						2015	2	9	40	9.4	5.9	7.65	93	101.785	28.4998	30.4675	4.54771	3.20281
						2015	2	10	41	10.3	5.1	7.7	86	63.8075	26.5439	23.2806	3.48178	3.01098
						2015	2	11	42	8.4	4.2	6.3	89.5	84.0458	28.2394	27.5588	3.89534	2.78091
						2015	2	12	43	7.2	3.7	5.45	92.5	91.8564	25.7198	27.4956	3.74934	2.29754
						2015	2	13	44	7.7	4.3	6	84	90.2568	24.5499	26.6281	3.71693	2.35953
						2015	2	14	45	8.6	3.4	6	84.5	36.1968	15.0579	13.2066	1.84347	1.51881
						2015	2	15	46	8.7	4.8	6.75	82.5	90.094	28.1093	28.4674	4.0989	2.90538
						2015	2	16	47	7.9	5.7	6.8	84	126.643	22.2892	30.0547	4.33626	2.3574
						2015	2	17	48	10.5	4.4	7.45	84	64.116	31.2886	25.3368	3.75216	3.43376
						2015	2	18	49	6.9	0	3.45	96	67.4486	37.2316	28.3477	3.533	2.27937
						2015	2	19	50	5.9	2.9	4.4	87	99.9883	23.9972	27.7096	3.60787	1.83417
						2015	2	20	51	3.5	-0.1	1.7	83.5	98.4952	28.3666	29.901	3.41971	0.961116
						2015	2	21	52	9.2	-1.1	4.05	65	34.1803	28.1645	17.5515	2.24923	1.99394
						2015	2	22	53	10.6	0.2	5.4	62.5	58.6084	48.7622	30.241	4.11484	4.17287
						2015	2	23	54	9.9	3.6	6.75	60	75.0882	37.8445	30.1552	4.34192	3.84197
						2015	2	24	55	10.5	6.8	8.65	58.5	97.7836	28.9439	30.0945	4.66853	3.51871
						2015	2	25	56	8.4	4.7	6.55	81.5	89.1543	26.3897	27.4387	3.91859	2.68343
						2015	2	26	57	14.5	4.5	9.5	75	55.1208	44.0967	27.8892	4.46546	5.55183
						2015	2	27	58	15.6	7.5	11.55	64	58.5256	37.9246	26.6507	4.58759	5.39632
						2015	2	28	59	17.4	9.3	13.35	56.5	67.781	43.9221	30.8653	5.63893	6.71679
						2015	3	1	60	13.8	7.3	10.55	78.5	74.3879	38.6817	30.3444	5.04545	5.21894
						2015	3	2	61	14.5	6.3	10.4	83.5	64.5801	42.3646	29.5887	4.89376	5.64258
						2015	3	3	62	14.3	6.8	10.55	77.5	67.2553	40.3532	29.4698	4.90002	5.43289
						2015	3	4	63	15.8	5.2	10.5	64.5	55.8988	47.4022	29.1189	4.83314	6.31753
						2015	3	5	64	14	2.3	8.15	41	54.4632	50.9775	29.8068	4.5365	6.53621
						2015	3	6	65	14.5	4.6	9.55	44	52.476	41.561	26.4179	4.23763	5.71509
						2015	3	7	66	17.5	7.8	12.65	32.5	54.6753	42.428	27.2456	4.86578	7.89229
						2015	3	8	67	19.4	11	15.2	33.5	61.7688	41.5086	28.6437	5.54384	8.406
						2015	3	9	68	22.3	9.6	15.95	39	51.3299	52.1512	29.268	5.79341	10.0272
						2015	3	10	69	22.4	11.3	16.85	42	53.8948	47.8586	28.7295	5.83848	9.12792
						2015	3	11	70	16.4	13.1	14.75	41	96.4184	25.4545	28.0244	5.35002	4.77782
						2015	3	12	71	14.5	6.9	10.7	65.5	65.7235	39.9599	28.99	4.84574	5.42722
						2015	3	13	72	14.3	6	10.15	78.5	61.0634	40.5461	28.1475	4.61413	5.33418
						2015	3	14	73	16.1	8.1	12.1	70.5	60.6416	38.8106	27.4433	4.81255	5.66119
						2015	3	15	74	15.9	7.2	11.55	70	58.7861	40.9151	27.7431	4.77563	5.79962
						2015	3	16	75	17.1	5.5	11.3	64.5	47.9814	44.5267	26.147	4.46254	6.20906
						2015	3	17	76	17.5	7.5	12.5	45	51.6196	41.2957	26.1177	4.64136	6.55011
						2015	3	18	77	16	7.7	11.85	52	59.7672	39.6854	27.55	4.79088	5.71553
						2015	3	19	78	14.4	8.3	11.35	71	65.2445	31.8393	25.7827	4.40793	4.53056
						2015	3	20	79	11.9	6.4	9.15	80	72.7427	32.0068	27.2955	4.31437	4.00478
						2015	3	21	80	9.3	4.3	6.8	88.5	74.9766	29.9906	26.8244	3.8702	3.10211
						2015	3	22	81	11.8	1.8	6.8	67	53.6627	42.9302	27.1514	3.91738	4.35333
						2015	3	23	82	15.5	3.6	9.55	46.5	48.9786	46.6277	27.0334	4.33636	6.16864
						2015	3	24	83	14.9	7.9	11.4	65.5	62.5003	35.0002	26.4577	4.53108	4.96503
						2015	3	25	84	15.4	6.6	11	66	55.6106	39.1499	26.3948	4.45841	5.40877
						2015	3	26	85	19.3	7.3	13.3	50	47.0011	45.1211	26.0507	4.75168	6.87814
						2015	3	27	86	19.1	10.8	14.95	46	57.2321	38.0021	26.3814	5.06732	6.55841
						2015	3	28	87	16.7	11.7	14.2	66.5	74.9075	29.963	26.7997	5.02977	4.8321
						2015	3	29	88	15.1	10.8	12.95	85.5	76.8161	26.4247	25.4863	4.59642	4.09561
						2015	3	30	89	15.6	8.6	12.1	76.5	60.9178	34.114	25.7877	4.52223	5.01111
						2015	3	31	90	17.1	8.7	12.9	72.5	53.8593	36.1935	24.9759	4.49704	5.4873
						2015	4	1	91	17.1	8.8	12.95	71	52.8558	35.0962	24.3642	4.39404	5.34111
						2015	4	2	92	15.9	7.6	11.75	79	52.2835	34.7162	24.1004	4.17685	5.01184
						2015	4	3	93	18.6	10.5	14.55	69	58.6948	38.0342	26.7277	5.07112	6.12454
						2015	4	4	94	16.1	9.4	12.75	72.5	62.7752	33.6475	25.9983	4.65827	5.09018
						2015	4	5	95	18.5	7.3	12.9	69	47.9455	42.9592	25.673	4.62257	6.45705
						2015	4	6	96	19.9	7.8	13.85	64.5	36.5602	35.3903	20.348	3.77714	5.57787
						2015	4	7	97	22.9	12.7	17.8	45.5	48.725	39.7596	24.8984	5.19864	7.49302
						2015	4	8	98	21.9	9.3	15.6	58	43.0154	43.3595	24.4303	4.78568	7.1828
						2015	4	9	99	22.5	11.3	16.9	45	46.427	41.5986	24.8599	5.05937	7.68756
						2015	4	10	100	15.3	6.3	10.8	62.5	52.109	37.5185	25.0123	4.19554	5.13989
						2015	4	11	101	15.2	5.4	10.3	67	25.1757	19.7378	12.61	2.07821	2.75478
						2015	4	12	102	12.6	6.8	9.7	79.5	49.425	22.9332	19.045	3.07172	3.04635
						2015	4	13	103	17.1	5.4	11.25	59	38.9587	36.4653	21.3215	3.63271	5.12235
						2015	4	14	104	18	7.3	12.65	50.5	40.2881	34.4866	21.0857	3.76569	5.18753
						2015	4	15	105	18.9	9.2	14.05	41.5	43.9044	34.0698	21.8783	4.08688	6.07981
						2015	4	16	106	21.2	12.8	17	37	43.8425	29.4622	20.3308	4.14956	6.16126
						2015	4	17	107	22.7	11.9	17.3	37.5	38.9378	33.6422	20.474	4.21481	6.99232
						2015	4	18	108	21.7	10.1	15.9	58	29.671	27.5347	16.1689	3.1958	4.72557
						2015	4	19	109	21.6	9.7	15.65	70	39.497	37.6011	21.8	4.27682	6.28259
						2015	4	20	110	22.6	10.5	16.55	55.5	37.2719	36.0792	20.7441	4.17916	6.20688
						2015	4	21	111	20.9	12.6	16.75	59.5	39.3598	26.1349	18.1431	3.67644	4.61599
						2015	4	22	112	13.5	9.2	11.35	85.5	60.0306	20.6505	19.9171	3.40513	3.03653
						2015	4	23	113	14.7	4.7	9.7	68.5	30.3819	24.3055	15.3722	2.47934	3.21341
						2015	4	24	114	15.9	5	10.45	63	29.6134	25.8229	15.6431	2.59184	3.553
						2015	4	25	115	20.2	6.7	13.45	52	33.6411	36.3324	19.7769	3.62473	5.63101
						2015	4	26	116	22	11.5	16.75	40	35.5798	29.887	18.4467	3.73795	5.97672
						2015	4	27	117	25.3	14.5	19.9	34	27.9967	24.1892	14.7211	3.25498	5.70692
						2015	4	28	118	27.1	14.8	20.95	35.5	16.1931	15.934	9.08663	2.06511	3.93058
						2015	4	29	119	29.5	13.3	21.4	53.5	25.7544	33.3778	16.5855	3.81315	6.4641
						2015	4	30	120	26	16.2	21.1	38	31.1183	24.3968	15.5865	3.55604	5.62188
						2015	5	1	121	23	12.3	17.65	61.5	20.4513	17.5063	10.7036	2.22544	3.28395
						2015	5	2	122	22.9	11	16.95	64.5	27.2404	25.9328	15.0351	3.06428	4.60864
						2015	5	3	123	22.2	12.5	17.35	61.5	28.5148	22.1275	14.2094	2.92934	4.02639
						2015	5	4	124	26.1	11.9	19	58	10.2285	11.6196	6.16703	1.33104	2.37498
						2015	5	5	125	27.6	15.1	21.35	33.5	22.333	22.333	12.6334	2.90082	5.49505
						2015	5	6	126	29.1	16.6	22.85	29	13.5628	13.5628	7.67226	1.82916	3.80817
						2015	5	7	127	28.5	14.1	21.3	26	15.9051	18.3227	9.6569	2.21453	4.98614
						2015	5	8	128	30	14.8	22.4	27.5	19.1746	23.3163	11.961	2.82008	6.23337
						2015	5	9	129	22.7	16.2	19.45	55	29.329	15.2511	11.9639	2.61378	3.03507
						2015	5	10	130	25.5	13.8	19.65	63.5	21.514	20.1371	11.7743	2.58615	3.90754
						2015	5	11	131	22.8	14.5	18.65	63.5	24.9382	16.559	11.4954	2.45748	3.20413
						2015	5	12	132	24.1	13.5	18.8	59	18.2069	15.4395	9.48439	2.03591	3.02254
						2015	5	13	133	23.7	12.1	17.9	63.5	11.058	10.2618	6.02593	1.26171	2.08329
						2015	5	14	134	22.5	12.1	17.3	60.5	19.5351	16.2532	10.0798	2.07504	3.04565
						2015	5	15	135	25.1	13.2	19.15	53.5	4.54322	4.32515	2.50759	0.543425	1.11518
						2015	5	16	136	29.6	13.9	21.75	49.5	16.0097	20.1082	10.1497	2.35433	4.10178
						2015	5	17	137	32.9	20.2	26.55	29.5	16.0447	16.3015	9.1486	2.37967	4.71001
						2015	5	18	138	33.7	18.5	26.1	30	18.641	22.6674	11.6281	2.99394	6.26628
						2015	5	19	139	34.8	23	28.9	22	19.0146	17.9498	10.4508	2.86241	5.72553
						2015	5	20	140	35.8	23.7	29.75	22	12.1474	11.7587	6.76075	1.88544	3.99568
						2015	5	21	141	31.7	17.8	24.75	32.5	4.10471	4.56444	2.44856	0.611052	1.60554
						2015	5	22	142	28.1	15.2	21.65	54	20.9122	21.5814	12.0175	2.78055	4.33481
						2015	5	23	143	28.8	16.2	22.5	54	2.6798	2.70124	1.52197	0.359733	0.89117
						2015	5	24	144	30.8	16.5	23.65	54.5	21.1189	24.16	12.7779	3.10636	4.97935
						2015	5	25	145	30.2	16.8	23.5	43.5	20.8122	22.3107	12.1896	2.95262	5.04584
						2015	5	26	146	28.4	15.2	21.8	38	12.1128	12.7911	7.04128	1.63536	3.20127
						2015	5	27	147	29.8	15.6	22.7	51	20.223	22.9733	12.193	2.89622	4.67826
						2015	5	28	148	30.5	17.9	24.2	35	26.276	26.4862	14.9233	3.67606	6.64075
						2015	5	29	149	24.8	15.7	20.25	58	13.1693	9.58725	6.35628	1.41849	2.07954
						2015	5	30	150	24	13.8	18.9	60	8.81894	7.19625	4.50647	0.969997	1.60496
						2015	5	31	151	27.6	13.5	20.55	54	11.8341	13.3489	7.10994	1.59919	2.76663
						2015	6	1	152	33.4	17.7	25.55	27.5	11.7796	14.7952	7.46793	1.89871	4.35824
						2015	6	2	153	29.5	22.4	25.95	32.5	12.2448	6.95503	5.22035	1.33951	2.22108
						2015	6	3	154	30	17.4	23.7	52.5	11.5825	11.6751	6.5782	1.60112	2.61324
						2015	6	4	155	29.7	14.3	22	54.5	23.2581	28.654	14.6034	3.40883	5.66686
						2015	6	5	156	30.8	15.6	23.2	48	26.2794	31.9557	16.3929	3.94193	6.593
						2015	6	6	157	27.5	16.1	21.8	61	37.0637	33.8021	20.0227	4.65034	6.59128
						2015	6	7	158	31.4	15.2	23.3	57.5	26.7024	34.6063	17.196	4.14512	6.92056
						2015	6	8	159	30.9	17.1	24	55	4.21889	4.65765	2.50759	0.614754	1.28724
						2015	6	9	160	36.1	19.1	27.6	35	5.85434	7.9619	3.86209	1.02836	2.45149
						2015	6	10	161	28.8	17.7	23.25	54	41.5726	36.9165	22.161	5.33543	7.35004
						2015	6	11	162	28.5	16.4	22.45	60	37.806	36.5962	21.0413	4.96715	7.18923
						2015	6	12	163	29	15.7	22.35	61	25.6305	27.2708	14.9555	3.52173	5.44649
						2015	6	13	164	31.6	16.5	24.05	66.5	28.1542	34.0103	17.5046	4.29651	6.89234
						2015	6	14	165	31.8	17.1	24.45	51	32.7794	38.5486	20.1085	4.98281	7.80786
						2015	6	15	166	32.2	19.5	25.85	50	7.79914	7.92392	4.44701	1.13847	1.96442
						2015	6	16	167	33.6	20.4	27	56.5	20.0668	21.1905	11.665	3.065	4.63947
						2015	6	17	168	33.7	20.4	27.05	32.5	27.8032	29.5826	16.2234	4.26748	7.89509
						2015	6	18	169	33.2	20.3	26.75	40	49.2766	50.8534	28.3175	7.39896	12.018
						2015	6	19	170	32.4	20.2	26.3	55.5	40.8094	39.83	22.8066	5.89884	8.27539
						2015	6	20	171	28.6	18.4	23.5	56	31.0281	25.3189	15.8553	3.84055	5.18634
						2015	6	21	172	30.6	18.2	24.4	48.5	52.6576	52.2363	29.6682	7.34298	10.653
						2015	6	22	173	33.3	19.1	26.2	51.5	50.6481	57.5362	30.537	7.88039	11.7545
						2015	6	23	174	32.4	20.1	26.25	51	52.9414	52.0943	29.7076	7.67506	10.6891
						2015	6	24	175	30.9	19.5	25.2	42.5	51.6665	47.1198	27.9114	7.03911	10.5875
						2015	6	25	176	30.8	19.7	25.25	52	55.1366	48.9613	29.3915	7.421	9.92805
						2015	6	26	177	31.4	19	25.2	56.5	54.0763	53.6436	30.4675	7.68376	10.8306
						2015	6	27	178	30.3	18.1	24.2	39	41.6575	40.6577	23.2806	5.7347	9.46654
						2015	6	28	179	32.9	17.7	25.3	56	44.1793	53.7221	27.5588	6.96636	10.8619
						2015	6	29	180	29.8	17.6	23.7	55	49.1998	48.019	27.4956	6.69236	9.51294
						2015	6	30	181	29.5	17.1	23.3	43.5	47.2616	46.8835	26.6281	6.41873	10.0935
						2015	7	1	182	35.5	18.8	27.15	45	20.1983	26.9849	13.2066	3.48169	6.22035
						2015	7	2	183	35.5	20.7	28.1	45	46.2484	54.7582	28.4674	7.66353	12.3103
						2015	7	3	184	35.3	19.5	27.4	45.5	47.2568	59.7325	30.0547	7.96744	13.1811
						2015	7	4	185	35.2	20.3	27.75	56	41.024	48.9007	25.3368	6.76874	10.2608
						2015	7	5	186	34.1	19.9	27	46.5	47.0168	53.4111	28.3477	7.44841	11.6136
						2015	7	6	187	35	21.4	28.2	37	46.9613	51.0939	27.7096	7.47576	12.7611
						2015	7	7	188	36.8	22	29.4	37.5	48.5775	57.5158	29.901	8.27745	14.4202
						2015	7	8	189	37.2	21.9	29.55	57.5	28.0445	34.3265	17.5515	4.87418	7.48807
						2015	7	9	190	31.8	20.1	25.95	48.5	55.2565	51.7201	30.241	7.75966	10.7973
						2015	7	10	191	35	21.3	28.15	42	50.9192	55.8075	30.1552	8.12673	13.0471
						2015	7	11	192	37.2	23.3	30.25	43	50.4498	56.1002	30.0945	8.48102	13.2651
						2015	7	12	193	35.4	22.7	29.05	40	48.1217	48.8917	27.4387	7.53947	11.9115
						2015	7	13	194	35.4	22.5	28.95	42	48.5312	50.0842	27.8892	7.6469	11.8714
						2015	7	14	195	37.2	21.7	29.45	31.5	42.308	52.4619	26.6507	7.38547	14.1654
						2015	7	15	196	37.2	23.4	30.3	38	51.9291	57.3298	30.8653	8.7073	14.4329
						2015	7	16	197	37.2	23.8	30.5	35.5	51.8092	55.5395	30.3444	8.59596	14.4562
						2015	7	17	198	37.2	23.7	30.45	30	50.3314	54.3579	29.5887	8.37319	15.0733
						2015	7	18	199	37.2	23.3	30.25	32.5	49.4026	54.9357	29.4698	8.30497	14.7723
						2015	7	19	200	37.3	21.9	29.6	29.5	46.3762	57.1354	29.1189	8.09509	15.7535
						2015	7	20	201	37.2	24.1	30.65	42.5	51.4707	53.9413	29.8068	8.46989	12.9118
						2015	7	21	202	37.2	21.3	29.25	37.5	41.4075	52.6704	26.4179	7.28997	13.225
						2015	7	22	203	37.3	23.7	30.5	36	46.1751	50.2385	27.2456	7.71813	13.0488
						2015	7	23	204	37.4	24.6	31	42	50.0385	51.2394	28.6437	8.19817	12.4145
						2015	7	24	205	37.2	22.8	30	27	48.2049	55.5321	29.268	8.20519	15.8214
						2015	7	25	206	37.2	24.4	30.8	48	50.1884	51.3929	28.7295	8.18903	11.4682
						2015	7	26	207	35.4	20.3	27.85	46.5	45.0742	54.4497	28.0244	7.50318	11.9613
						2015	7	27	208	37.4	22.2	29.8	48.5	46.4735	56.5118	28.99	8.09324	12.343
						2015	7	28	209	37.2	22.4	29.8	48	45.7288	54.1428	28.1475	7.85806	11.9268
						2015	7	29	210	38	22.6	30.3	47	43.7075	53.8476	27.4433	7.74193	12.0958
						2015	7	30	211	37.2	23.4	30.3	54	46.6761	51.5305	27.7431	7.8265	11.1183
						2015	7	31	212	35.9	21.6	28.75	57	43.2149	49.4378	26.147	7.13854	10.497
						2015	8	1	213	35.4	21.9	28.65	41	44.4271	47.9812	26.1177	7.11522	11.4979
						2015	8	2	214	37.1	23.7	30.4	23.5	47.0381	50.4249	27.55	7.7882	15.0276
						2015	8	3	215	37.2	27.5	32.35	17.5	51.7396	40.1499	25.7827	7.58346	13.0998
						2015	8	4	216	38.4	28.1	33.25	27.5	53.156	43.8005	27.2955	8.17249	12.9546
						2015	8	5	217	37.1	25.5	31.3	43	49.2245	45.6804	26.8244	7.72467	11.0123
						2015	8	6	218	37.1	23.5	30.3	57	46.0154	50.0648	27.1514	7.6596	10.8143
						2015	8	7	219	34.7	22.6	28.65	48.5	48.5722	47.0179	27.0334	7.36468	10.2061
						2015	8	8	220	37.1	22.1	29.6	51	42.6959	51.235	26.4577	7.35525	10.9711
						2015	8	9	221	35.1	22.1	28.6	53	45.7538	47.584	26.3948	7.18299	10.1011
						2015	8	10	222	34.8	23.3	29.05	55.5	48.012	44.1711	26.0507	7.15808	9.45753
						2015	8	11	223	33.8	22.4	28.1	56.5	48.8344	44.537	26.3814	7.10198	9.42385
						2015	8	12	224	35.3	22.5	28.9	53.5	46.8172	47.9408	26.7997	7.34033	10.2102
						2015	8	13	225	37.1	23.9	30.5	55.5	43.8429	46.2981	25.4863	7.21974	10.0552
						2015	8	14	226	37.1	23.6	30.35	61	43.8658	47.3751	25.7877	7.28245	10.2622
						2015	8	15	227	35.4	21.9	28.65	54.5	42.4848	45.8836	24.9759	6.80416	9.76123
						2015	8	16	228	36.1	22.3	29.2	29.5	40.9913	45.2544	24.3642	6.7161	12.5355
						2015	8	17	229	37.1	24.4	30.75	34	42.267	42.9433	24.1004	6.86248	11.5279
						2015	8	18	230	37.1	23.1	30.1	36	44.6455	50.003	26.7277	7.50871	12.9334
						2015	8	19	231	37.1	22.5	29.8	53.5	42.5255	49.6698	25.9983	7.25806	10.6731
						2015	8	20	232	37.1	23.8	30.45	45.5	43.9978	46.8137	25.673	7.26511	10.8097
						2015	8	21	233	37.1	23.8	30.45	53.5	34.8719	37.1037	20.348	5.7582	8.14013
						2015	8	22	234	36.1	22.8	29.45	58.5	42.6703	45.4012	24.8984	6.89988	9.75413
						2015	8	23	235	35.4	23	29.2	51.5	43.3609	43.014	24.4303	6.73434	9.23713
						2015	8	24	236	36.5	23.4	29.95	43.5	42.9283	44.9889	24.8599	6.96211	10.6272
						2015	8	25	237	34.3	21.9	28.1	30	44.3939	44.0387	25.0123	6.7334	11.9869
						2015	8	26	238	33.7	22	27.85	23.5	23.041	21.5664	12.61	3.37616	6.57073
						2015	8	27	239	33.8	22.2	28	29	34.9488	32.4324	19.045	5.11581	9.05933
						2015	8	28	240	35.3	21.5	28.4	36.5	35.8722	39.6029	21.3215	5.77733	10.0888
						2015	8	29	241	34.9	22.9	28.9	26.5	38.0433	36.5216	21.0857	5.77529	10.5251
						2015	8	30	242	32.7	22.6	27.65	36.5	43.0263	34.7652	21.8783	5.83198	8.83538
						2015	8	31	243	37.1	18.3	27.7	30.5	29.306	44.0762	20.3308	5.42543	11.8703
						2015	9	1	244	37.1	23.5	30.3	39	34.6987	37.7522	20.474	5.77585	9.55953
						2015	9	2	245	37.1	23.1	30.1	39	27.0083	30.2493	16.1689	4.5424	7.74229
						2015	9	3	246	37.1	22.7	29.9	44.5	35.9051	41.3627	21.8	6.09879	9.67502
						2015	9	4	247	35.1	21.4	28.25	38.5	35.0279	38.3905	20.7441	5.60263	9.54333
						2015	9	5	248	37.1	21.1	29.1	22.5	28.3486	36.2862	18.1431	4.9906	10.9341
						2015	9	6	249	37.1	25.8	31.45	21	37.0312	33.4762	19.9171	5.75309	10.5577
						2015	9	7	250	37.1	28.5	32.8	19.5	32.7616	22.54	15.3722	4.56198	7.52212
						2015	9	8	251	37.1	27.9	32.5	17	32.2335	23.7239	15.6431	4.61485	8.05645
						2015	9	9	252	37.1	26.7	31.9	13	38.3284	31.8893	19.7769	5.76477	10.9516
						2015	9	10	253	37.1	28.8	32.95	16	40.0183	26.5722	18.4467	5.49063	9.07137
						2015	9	11	254	37.1	26.7	31.9	23.5	28.5301	23.737	14.7211	4.29105	7.50729
						2015	9	12	255	37.1	25	31.05	42	16.3264	15.8039	9.08663	2.60337	4.1677
						2015	9	13	256	36.1	23.1	29.6	42.5	28.75	29.9	16.5855	4.6108	7.2868
						2015	9	14	257	37.1	20.9	29	17.5	24.2031	31.3673	15.5865	4.27822	10.0098
						2015	9	15	258	37.1	24.3	30.7	21	18.6985	19.1473	10.7036	3.04468	6.25489
						2015	9	16	259	37.1	23.1	30.1	43	25.1144	28.1281	15.0351	4.22386	6.8772
						2015	9	17	260	35.6	21.7	28.65	48	23.8204	26.4883	14.2094	3.87106	5.98098
						2015	9	18	261	35.8	21	28.4	47.5	10.019	11.8625	6.16703	1.67104	2.93145
						2015	9	19	262	37.1	21.7	29.4	50	20.1206	24.7886	12.6334	3.49729	5.51738
						2015	9	20	263	34.6	20.7	27.65	41	12.8616	14.3021	7.67226	2.04515	3.71794
						2015	9	21	264	30	21.6	25.8	54	20.8247	13.9942	9.6569	2.4694	3.15297
						2015	9	22	265	31.2	18.5	24.85	43.5	20.9771	21.3127	11.961	2.99195	4.94413
						2015	9	23	266	34.1	18.9	26.5	38.5	19.1793	23.322	11.9639	3.10846	5.85677
						2015	9	24	267	32	20.7	26.35	52	21.8914	19.7899	11.7743	3.04882	4.32227
						2015	9	25	268	32	18.7	25.35	52	19.7006	20.9614	11.4954	2.9092	4.48945
						2015	9	26	269	32.7	19.4	26.05	58.5	16.2541	17.2944	9.48439	2.4392	3.81337
						2015	9	27	270	32.3	18.8	25.55	58	10.2503	11.0703	6.02593	1.53208	2.57057
						2015	9	28	271	32.3	19.4	25.85	62	17.5403	18.1016	10.0798	2.5805	3.96096
						2015	9	29	272	28.8	19.6	24.2	61	5.16706	3.80296	2.50759	0.617696	1.12778
						2015	9	30	273	28.4	19	23.7	53	20.6904	15.5592	10.1497	2.47041	3.35061
						2015	10	1	274	30.2	17.8	24	67.5	16.2377	16.1078	9.1486	2.24284	3.47157
						2015	10	2	275	26.9	17.9	22.4	38.5	24.2253	17.4422	11.6281	2.7416	4.2223
						2015	10	3	276	32.3	20.7	26.5	43.5	19.1778	17.797	10.4508	2.71531	4.30221
						2015	10	4	277	32.1	21	26.55	54.5	12.6827	11.2623	6.76075	1.75856	2.64491
						2015	10	5	278	30.6	19	24.8	57	4.49326	4.16974	2.44856	0.61177	1.20917
						2015	10	6	279	28.3	18.9	23.6	70	24.498	18.4225	12.0175	2.91799	3.88781
						2015	10	7	280	23	13.6	18.3	62.5	3.10258	2.33314	1.52197	0.322242	0.753528
						2015	10	8	281	24.6	14	19.3	64.5	24.5294	20.8009	12.7779	2.78036	3.99289
						2015	10	9	282	25.7	14	19.85	55	22.2729	20.8474	12.1896	2.69168	4.05009
						2015	10	10	283	27.7	15.2	21.45	37.5	12.4473	12.4473	7.04128	1.62091	3.12559
						2015	10	11	284	28.4	16.5	22.45	36	22.091	21.0307	12.193	2.87835	5.15594
						2015	10	12	285	30.5	17.5	24	42.5	25.8686	26.9034	14.9233	3.65855	6.12365
						2015	10	13	286	28.3	18.4	23.35	61	12.626	9.99979	6.35628	1.53406	2.28193
						2015	10	14	287	27.6	15.3	21.45	54.5	8.03089	7.9024	4.50647	1.03739	1.82289
						2015	10	15	288	29.5	17.5	23.5	39.5	12.8279	12.3148	7.10994	1.7222	3.13454
						2015	10	16	289	30.2	18.8	24.5	29.5	13.8238	12.6073	7.46793	1.85272	3.65359
						2015	10	17	290	30.5	18.5	24.5	23.5	9.41866	9.04191	5.22035	1.29511	2.95073
						2015	10	18	291	29.1	18.7	23.9	22.5	12.7488	10.607	6.5782	1.60883	3.36836
						2015	10	19	292	29	18	23.5	38.5	27.5194	24.217	14.6034	3.53731	5.79562
						2015	10	20	293	29.3	17.5	23.4	47	29.8261	28.1558	16.3929	3.96116	5.95849
						2015	10	21	294	27.3	17.8	22.55	63	40.6013	30.857	20.0227	4.73842	6.13358
						2015	10	22	295	25.8	16.7	21.25	59.5	35.6276	25.9369	17.196	3.93837	5.09317
						2015	10	23	296	24.4	16.2	20.3	65.5	5.47306	3.59033	2.50759	0.560338	1.01264
						2015	10	24	297	24.2	16.9	20.55	71.5	8.93389	5.21739	3.86209	0.868672	1.30947
						2015	10	25	298	22.1	15	18.55	69	51.9804	29.5248	22.161	4.72455	5.41881
						2015	10	26	299	23.3	15.2	19.25	76	46.2074	29.9424	21.0413	4.57225	5.58111
						2015	10	27	300	19.9	13.4	16.65	75	36.6628	19.0647	14.9555	3.02176	3.44991
						2015	10	28	301	18.8	13.4	16.1	79.5	47.0799	20.3385	17.5046	3.48032	3.59938
						2015	10	29	302	18.9	12.8	15.85	65.5	50.8856	24.8321	20.1085	3.96856	4.28791
						2015	10	30	303	22.4	12.9	17.65	65.5	9.01751	6.85331	4.44701	0.924597	1.49872
						2015	10	31	304	22.9	12.7	17.8	51.5	22.8278	18.6275	11.665	2.43558	3.48534
						2015	11	1	305	22.7	15.4	19.05	24	37.5284	21.9166	16.2234	3.50628	5.71009
						2015	11	2	306	19.7	14.1	16.9	28	74.7896	33.5057	28.3175	5.76305	7.68326
						2015	11	3	307	19.2	13	16.1	30	57.2459	28.394	22.8066	4.53449	6.28989
						2015	11	4	308	19.4	10.8	15.1	30.5	33.7914	23.2485	15.8553	3.05942	5.03823
						2015	11	5	309	19.4	13.4	16.4	45	75.7001	36.336	29.6682	5.95095	6.66599
						2015	11	6	310	20.9	12.2	16.55	47.5	64.7064	45.0357	30.537	6.15208	7.93703
						2015	11	7	311	22.9	12.3	17.6	55.5	57.0289	48.3605	29.7076	6.16792	8.44349
						2015	11	8	312	22.5	11.1	16.8	49	51.6665	47.1198	27.9114	5.66403	8.1744
						2015	11	9	313	19.8	10.8	15.3	35	61.2323	44.0872	29.3915	5.70581	8.77727
						2015	11	10	314	18	8.9	13.45	29.5	63.1243	45.9545	30.4675	5.58413	9.10324
						2015	11	11	315	18	8	13	35	46.0122	36.8098	23.2806	4.20545	6.79853
						2015	11	12	316	22.5	11.4	16.95	36.5	51.6987	45.9084	27.5588	5.61673	9.4162
						2015	11	13	317	22.2	11.2	16.7	35.5	51.814	45.5963	27.4956	5.56353	9.40094
						2015	11	14	318	22.3	11	16.65	36.5	49.5086	44.7557	26.6281	5.38018	9.11299
						2015	11	15	319	18.7	9.4	14.05	51.5	27.0664	20.1374	13.2066	2.467	3.33258
						2015	11	16	320	16.2	11.5	13.85	74.5	82.069	30.8579	28.4674	5.28433	4.90336
						2015	11	17	321	16.2	9.6	12.9	54	73.1174	38.606	30.0547	5.41151	5.83309
						2015	11	18	322	18.1	7.2	12.65	26.5	47.9643	41.8249	25.3368	4.52488	8.31922
						2015	11	19	323	18.8	6.7	12.75	35	50.9336	49.3038	28.3477	5.07921	8.88874
						2015	11	20	324	19.9	7.8	13.85	47	49.7871	48.1939	27.7096	5.14365	7.80404
						2015	11	21	325	17.6	7.5	12.55	39.5	58.8038	47.5135	29.901	5.32247	8.05553
						2015	11	22	326	17.2	9.8	13.5	29.5	40.3253	23.8726	17.5515	3.22201	4.92889
						2015	11	23	327	20.6	8.9	14.75	21	55.2565	51.7201	30.241	5.77319	11.6968
						2015	11	24	328	23.2	9.3	16.25	23.5	50.5516	56.2134	30.1552	6.02209	12.9565
						2015	11	25	329	19	8.7	13.85	42	58.6068	48.292	30.0945	5.58636	8.35484
						2015	11	26	330	15.9	10.7	13.3	57	75.2041	31.2849	27.4387	5.00485	4.86236
						2015	11	27	331	17.9	11.4	14.65	59.5	68.369	35.5519	27.8892	5.30785	5.76562
						2015	11	28	332	19.5	10.7	15.1	75	56.1496	39.5293	26.6507	5.14247	6.47243
						2015	11	29	333	17.4	9.5	13.45	85	68.6336	43.3765	30.8653	5.65703	6.66335
						2015	11	30	334	12.9	9.4	11.15	63	101.374	28.3846	30.3444	5.15224	4.02813
						2015	12	1	335	15.1	6.9	11	67	64.5801	42.3646	29.5887	4.99789	5.83039
						2015	12	2	336	13.5	5.5	9.5	58.5	65.1196	41.6766	29.4698	4.71854	5.26092
						2015	12	3	337	9.7	3.9	6.8	33.5	75.5686	35.0638	29.1189	4.20125	4.43952
						2015	12	4	338	9.1	0.7	4.9	28.5	64.2771	43.1942	29.8068	3.96835	4.51829
						2015	12	5	339	9.5	2.1	5.8	23.5	60.6963	35.9322	26.4179	3.6566	4.53099
						2015	12	6	340	15	3.9	9.45	29.5	51.1111	45.3867	27.2456	4.35443	7.35437
						2015	12	7	341	15.2	5.2	10.2	31	56.6121	45.2896	28.6437	4.70387	7.55866
						2015	12	8	342	18.2	4.8	11.5	37	49.9712	53.5692	29.268	5.02954	8.87831
						2015	12	9	343	18	6.1	12.05	36.5	52.0517	49.5532	28.7295	5.02968	8.50713
						2015	12	10	344	13.9	7	10.45	45	66.6795	36.8071	28.0244	4.64326	5.30482
						2015	12	11	345	14	5.4	9.7	48	61.7843	42.5076	28.99	4.67572	5.58448
						2015	12	12	346	12.3	4.2	8.25	41.5	61.8127	40.0546	28.1475	4.30047	5.19884
						2015	12	13	347	12.5	5.5	9	40.5	64.8286	36.304	27.4433	4.31359	5.06904
						2015	12	14	348	16.3	7.4	11.85	38	58.1218	41.3828	27.7431	4.82444	6.96737
						2015	12	15	349	16.9	6.3	11.6	57	50.1936	42.5642	26.147	4.50855	6.03671
						2015	12	16	350	11.2	4.7	7.95	84.5	64.0262	33.2936	26.1177	3.94439	3.79969
						2015	12	17	351	8.6	6.7	7.65	80	124.918	18.9876	27.55	4.11224	2.20686
						2015	12	18	352	10.2	5.9	8.05	80	77.7095	26.7321	25.7827	3.90892	3.12041
						2015	12	19	353	10.3	7.1	8.7	65	95.3665	24.4138	27.2955	4.24233	3.01607
						2015	12	20	354	14.5	6.8	10.65	53.5	60.4178	37.2174	26.8244	4.4759	5.05939
						2015	12	21	355	14.4	6.7	10.55	44.5	61.1544	37.6711	27.1514	4.51454	5.48947
						2015	12	22	356	14.2	5.8	10	46	58.2962	39.1751	27.0334	4.40771	5.40926
						2015	12	23	357	14.1	3.8	8.95	39.5	51.5244	42.4561	26.4577	4.15091	5.93453
						2015	12	24	358	14.7	6.6	10.65	44.5	57.9638	37.5605	26.3948	4.40422	5.50455
						2015	12	25	359	16.7	5.6	11.15	51.5	48.8695	43.3961	26.0507	4.42319	6.01234
						2015	12	26	360	16.4	6.2	11.3	43.5	51.6272	42.1278	26.3814	4.50256	6.43643
						2015	12	27	361	15.7	6.6	11.15	42	55.5252	40.4223	26.7997	4.55037	6.26147
						2015	12	28	362	16	5.8	10.9	46.5	49.8754	40.6983	25.4863	4.28999	5.86142
						2015	12	29	363	10.8	6.6	8.7	56.5	78.6445	26.4246	25.7877	4.00799	3.24489
						2015	12	30	364	10.7	3.7	7.2	63	59	33.04	24.9759	3.66209	3.53199
						2015	12	31	365	7.9	0.4	4.15	62.5	55.6033	33.362	24.3642	3.13656	2.38167
																	1413.95	2104.17
																	ETo-HS	ETo-TURC (Ousman Couly (2016)

## Sheet: 2016
	KİLİS					year	month	day	DOY	Tmax	Tmin	Tmean	RHmean	Ra	Rs=0.16(Tmax-Tmin)^0.5*Ra	Rs=from meteorological station	ETo-HS	ETo-TURC (Ousman Couly (2016)
	DOY	246					#	#		°C	°C	°C	%	MJ m-2 day-1*(0.408 mm day-1)
	φ (-)	36.71	0.64071			2016	1	1	1	3.3	-1.3	1	74	31.8099	11.706	10.9159	1.20361	0.267298
	tan(φ)		0.745649			2016	1	2	2	3	-5	-1	37	11.3689	7.27611	5.14499	0.506946	-0.245908
	sin(φ)		0.597765			2016	1	3	3	2.4	-4.3	-0.95	44.5	3.79626	2.03479	1.57222	0.155375	-0.0932524
	cos(φ)		0.801671			2016	1	4	4	-1.2	-2.4	-1.8	81.5	62.4379	5.99404	10.9436	1.02694	-0.341734
	dr	0.984766		(1+0.033*cos(2*3.14/365*DOY))		2016	1	5	5	3.4	-1.4	1	89.5	11.0951	4.26052	3.8893	0.428842	0.123041
	δ	0.120494		(0.409*sin(2*3.14/365*DOY-1.39))		2016	1	6	6	4.4	1.1	2.75	94	16.3862	4.32595	4.76271	0.574029	0.308146
	tan(δ)	0.121081				2016	1	7	7	7.8	3.9	5.85	94	22.6461	7.06557	7.15558	0.992531	0.796337
	sin(δ)	0.120203				2016	1	8	8	10.9	4.5	7.7	80.5	19.5369	10.0029	7.90799	1.1827	1.27162
	cos(δ)	0.992749				2016	1	9	9	11.9	3.5	7.7	63	12.0746	8.11412	5.59928	0.837414	1.07301
	X	0.991849				2016	1	10	10	11.2	1.1	6.15	55	28.9408	23.3842	14.716	2.06712	2.29629		-
	ωs (eq. 25)	1.49314		(acos{(-1*tan(-0.35)*tan(0.409*sin(2*3.14/365*DOY-1.39))))		2016	1	11	11	7.2	5	6.1	72.5	56.731	9.98465	13.4633	1.8872	1.08214
	sin ωs	0.996986				2016	1	12	12	8.2	4.6	6.4	78.5	44.6493	12.859	13.5546	1.92384	1.38593
	sin φ*sin δ	-0.0718532		(sin(0.35)*sin(0.409*sin(2*3.14/365*DOY-1.39)))		2016	1	13	13	8.5	6.4	7.45	85.5	42.9766	7.22007	9.96464	1.47568	0.957755
	cos φ*cos δ	0.795859		(cos(0.35)*cos(0.409*sin(2*3.14/365*DOY-1.39))		2016	1	14	14	10.5	5.8	8.15	89	14.2676	5.36463	4.94903	0.753227	0.813568
	Gsc	0.082				2016	1	15	15	12.8	3.9	8.35	63.5	37.7757	26.8963	18.0313	2.76546	3.21332
						2016	1	16	16	10.9	3.6	7.25	58.5	12.381	7.23048	5.35224	0.786342	0.941473
	Ra	25.4105				2016	1	17	17	11.3	5.5	8.4	54	46.1348	21.4065	17.7772	2.73169	2.61474
						2016	1	18	18	9.3	5.2	7.25	76.5	11.0731	3.63199	3.58742	0.527058	0.577985
						2016	1	19	19	7.8	3.8	5.8	81	33.6321	10.7623	10.7623	1.48965	1.11098
						2016	1	20	20	6.6	2.1	4.35	77.5	60.7477	21.8692	20.6185	2.67854	1.66971
						2016	1	21	21	9.5	4.8	7.15	74	53.3937	20.076	18.5208	2.71018	2.21811
						2016	1	22	22	10.7	6.3	8.5	68.5	30.6584	10.7918	10.2896	1.58716	1.4444
						2016	1	23	23	9.3	6.1	7.7	77.5	78.3459	20.0565	22.4239	3.35366	2.3288
						2016	1	24	24	6.6	0.6	3.6	82	57.8578	27.7717	22.6755	2.84603	1.7917
						2016	1	25	25	2.9	-3	-0.05	51	44.6648	21.0818	17.3585	1.80708	-0.0240243
						2016	1	26	26	2.6	-5.9	-1.65	28.5	52.5372	35.7253	24.5073	2.32133	-1.89389
						2016	1	27	27	4.2	-3.9	0.15	28	50.8075	32.9233	23.1361	2.43569	0.141242
						2016	1	28	28	6.5	-3.7	1.4	36.5	44.4683	36.2861	22.7233	2.55882	1.21142
						2016	1	29	29	13.5	0.6	7.05	47	46.2077	47.6863	26.554	3.87011	5.14506
						2016	1	30	30	14.6	3.2	8.9	60	46.8348	42.7133	25.3012	3.96205	5.17207
						2016	1	31	31	11.3	6.8	9.05	73.5	79.2037	28.5133	26.8826	4.23335	3.56997
						2016	2	1	32	11	5	8	77	70.336	33.7613	27.566	4.1712	3.8657
						2016	2	2	33	15.2	6.2	10.7	57	58.4392	42.0762	28.0508	4.68876	5.70036
						2016	2	3	34	14.1	3.1	8.6	28.5	38.9467	34.2731	20.6675	3.20007	5.36948
						2016	2	4	35	14.2	3.7	8.95	41	41.4388	34.8086	21.4843	3.37065	4.82412
						2016	2	5	36	14.2	6.6	10.4	39	41.5112	25.2388	18.3102	3.02837	4.01393
						2016	2	6	37	10.5	5	7.75	67.5	75.9351	33.4114	28.4934	4.26975	3.74911
						2016	2	7	38	11.1	3.7	7.4	64.5	57.7084	34.1633	25.1174	3.7123	3.71273
						2016	2	8	39	11.8	2.5	7.15	43	58.9502	43.859	28.7639	4.20906	5.05781
						2016	2	9	40	12.3	1.6	6.95	53.5	39.3929	33.7203	20.6172	2.99277	3.51496
						2016	2	10	41	11.4	4.3	7.85	57	50.2136	28.5213	21.4077	3.22052	3.26007
						2016	2	11	42	10.7	4.3	7.5	68	63.9524	32.7436	25.8861	3.8411	3.59948
						2016	2	12	43	11	6.8	8.9	82	63.4826	21.3301	20.8161	3.25971	2.70361
						2016	2	13	44	15.6	8.4	12	71.5	49.8042	28.6872	21.3822	3.73711	4.24041
						2016	2	14	45	17.7	8.8	13.25	60	53.0386	37.7635	25.3167	4.61038	5.79463
						2016	2	15	46	19.4	9.2	14.3	57	48.1588	39.2976	24.6091	4.63307	6.26181
						2016	2	16	47	25	9.4	17.2	47	34.7741	43.3981	21.9755	4.51101	7.85519
						2016	2	17	48	24.5	14.2	19.35	31.5	51.3507	42.313	26.3685	5.74529	9.80332
						2016	2	18	49	25.1	12.2	18.65	33	46.5829	48.0736	26.7696	5.72278	10.7119
						2016	2	19	50	23.9	12.4	18.15	36	56.6602	52.1274	30.743	6.48207	11.0427
						2016	2	20	51	20.6	10.4	15.5	61.5	51.8738	42.329	26.5075	5.17703	6.99782
						2016	2	21	52	13.4	8.9	11.15	78.5	84.1024	30.2769	28.5453	4.84675	4.27824
						2016	2	22	53	15.8	6.9	11.35	72.5	46.6887	33.2424	22.2857	3.81007	4.71791
						2016	2	23	54	13.6	10	11.8	66.5	94.221	27.1357	28.6035	4.96568	3.98908
						2016	2	24	55	17.5	7.9	12.7	68.5	57.456	44.1262	28.4833	5.09517	6.5687
						2016	2	25	56	18.5	7.4	12.95	62	43.0265	38.2075	22.936	4.13647	5.78799
						2016	2	26	57	20.1	10.5	15.3	55	57.0641	43.8252	28.289	5.4918	7.18732
						2016	2	27	58	16.6	12.6	14.6	57.5	79.8919	25.5654	25.5654	4.85809	4.22866
						2016	2	28	59	20.9	9.1	15	59.5	40.8653	38.5769	22.4603	4.32074	6.30337
						2016	3	1	60	14.6	12	13.3	70.5	80.349	16.7126	20.7294	3.78108	2.73933
						2016	3	2	61	22.9	11.6	17.25	40	52.7462	47.6826	28.3694	5.83186	9.43199
						2016	3	3	62	20.8	12.3	16.55	28.5	57.4407	39.0597	26.7947	5.39814	8.74681
						2016	3	4	63	17.1	10.7	13.9	60	72.1905	36.9615	29.2207	5.43272	5.8226
						2016	3	5	64	15.8	6.9	11.35	74.5	57.814	41.1635	27.5961	4.71796	5.77562
						2016	3	6	65	17.4	7.6	12.5	65.5	53.7762	42.1606	26.9354	4.78667	6.23531
						2016	3	7	66	16.6	4.9	10.75	63.5	52.292	48.9453	28.6186	4.79206	6.60486
						2016	3	8	67	17.6	7.6	12.6	54.5	59.88	47.904	30.2971	5.40186	7.07523
						2016	3	9	68	19.7	9.5	14.6	39	57.4718	46.897	29.368	5.58069	8.66744
						2016	3	10	69	22.2	11.8	17	38.5	52.477	43.6609	27.0773	5.52654	8.77243
						2016	3	11	70	22.5	12.6	17.55	44	61.0333	48.3384	30.7259	6.37033	9.1512
						2016	3	12	71	19.6	7.7	13.65	61.5	44.7737	42.6246	24.7125	4.55833	6.60418
						2016	3	13	72	20.5	7.8	14.15	55.5	53.6416	54.4998	30.586	5.73142	8.51565
						2016	3	14	73	21.6	11.3	16.45	42.5	59.8022	49.277	30.7083	6.16857	9.22136
						2016	3	15	74	16	9	12.5	62	71.7018	40.153	30.3528	5.39398	5.95242
						2016	3	16	75	14.3	8.9	11.6	78	80.9435	34.9676	30.0953	5.18937	5.00974
						2016	3	17	76	13.7	8.2	10.95	74.5	58.8951	25.9138	22.0994	3.72637	3.66316
						2016	3	18	77	15.1	4.7	9.9	47.5	58.8413	48.956	30.3612	4.93249	6.51627
						2016	3	19	78	15.4	3.3	9.35	47	49.3057	47.7279	27.4416	4.36966	6.18421
						2016	3	20	79	16.4	4	10.2	65	49.3469	48.9521	27.8029	4.5658	6.40457
						2016	3	21	80	18.4	9.1	13.75	45	47.8566	35.6053	23.3509	4.32087	5.98794
						2016	3	22	81	13.8	8	10.9	50.5	71.9502	33.3849	27.7246	4.66676	4.62817
						2016	3	23	82	18.6	7.4	13	42	49.3217	44.1923	26.4099	4.77074	7.42263
						2016	3	24	83	20.5	8.3	14.4	59	42.9304	41.9001	23.9919	4.53095	6.67931
						2016	3	25	84	23.5	11.5	17.5	36	50.8357	48.8023	28.176	5.8334	10.1941
						2016	3	26	85	20.3	10.7	15.5	53.5	57.2896	43.9984	28.4008	5.54681	7.26081
						2016	3	27	86	18.7	9.6	14.15	59.5	59.1937	43.093	28.5704	5.35372	6.79916
						2016	3	28	87	17.4	6.3	11.85	57.5	54.7455	48.614	29.183	5.07484	6.93709
						2016	3	29	88	12.1	7.2	9.65	74.5	85.3229	33.4466	30.2193	4.86513	4.31269
						2016	3	30	89	16.4	5.4	10.9	52	55.0458	48.4403	29.2106	4.91689	6.59235
						2016	3	31	90	19	5.4	12.2	43	49.469	53.8223	29.1893	5.13585	8.55171
						2016	4	1	91	20.7	8.7	14.7	39.5	51.6198	49.555	28.6106	5.45354	9.11274
						2016	4	2	92	22.6	11.3	16.95	31.5	55.576	50.2407	29.8914	6.09213	10.8808
						2016	4	3	93	24.1	11	17.55	17.5	51.6319	54.1103	29.9002	6.19914	13.7547
						2016	4	4	94	25.7	10.9	18.3	26.5	49.3754	58.4605	30.3922	6.43483	13.7784
						2016	4	5	95	25.4	12.3	18.85	30	51.718	54.2005	29.95	6.43783	12.4938
						2016	4	6	96	25.6	13.5	19.55	25	49.4824	47.899	27.54	6.03285	11.9004
						2016	4	7	97	27	16.4	21.7	25.5	46.5791	39.4991	24.2641	5.6212	10.2913
						2016	4	8	98	27.7	16.1	21.9	31	49.3052	45.7552	26.8684	6.25605	11.1921
						2016	4	9	99	27.9	14.9	21.4	34	47.6605	49.5669	27.4948	6.32127	11.5665
						2016	4	10	100	25.8	17.8	21.8	33	66.6842	42.6779	30.1778	7.00892	10.2178
						2016	4	11	101	25.2	16	20.6	47	62.7786	46.205	30.4667	6.86159	9.03455
						2016	4	12	102	23.4	15	19.2	37.5	66.5199	44.7014	30.8469	6.69393	9.59751
						2016	4	13	103	17.5	11.3	14.4	66.5	78.2231	38.7987	31.1638	5.88538	6.2084
						2016	4	14	104	20.2	10.1	15.15	58.5	59.8833	48.3857	30.45	5.88451	7.86266
						2016	4	15	105	25.1	11.5	18.3	51	49.374	53.7189	29.1331	6.16826	9.50762
						2016	4	16	106	25.1	13.1	19.1	60.5	50.4595	48.4411	27.9675	6.05268	8.77404
						2016	4	17	107	26.8	12.2	19.5	21	44.0616	51.464	26.9375	5.89297	13.2711
						2016	4	18	108	28.8	15.4	22.1	20	50.1778	53.7907	29.389	6.87742	14.7416
						2016	4	19	109	29.9	17.5	23.7	18.5	50.4363	50.0329	28.4168	6.91657	14.3481
						2016	4	20	110	29.7	19	24.35	19.5	55.2713	47.3123	28.9276	7.15118	13.606
						2016	4	21	111	31.4	17.8	24.6	21.5	51.7192	56.2705	30.5169	7.58883	15.8146
						2016	4	22	112	28.7	17.8	23.25	13	54.5542	47.5713	28.8179	6.93814	14.304
						2016	4	23	113	26.5	11.8	19.15	16.5	47.2825	55.6043	29.0054	6.28582	14.8291
						2016	4	24	114	28.9	14.1	21.5	30.5	47.3218	56.0291	29.1281	6.71387	13.5691
						2016	4	25	115	30.6	15.7	23.15	53.5	47.3641	56.458	29.2525	7.02562	11.0136
						2016	4	26	116	27.5	17.2	22.35	40.5	58.9102	48.542	30.2502	7.12332	10.667
						2016	4	27	117	26.9	12.8	19.85	53	48.8119	55.0598	29.3262	6.47572	10.091
						2016	4	28	118	26.7	16.7	21.7	43.5	57.4023	45.9219	29.0435	6.72845	9.61762
						2016	4	29	119	25	11.5	18.25	39	49.8912	53.8825	29.3299	6.20132	11.0203
						2016	4	30	120	27.3	11.2	19.25	39	46.1811	59.4813	29.6481	6.44249	12.4136
						2016	5	1	121	27.1	15.1	21.1	30	52.4818	50.3825	29.0883	6.63646	12.224
						2016	5	2	122	29.6	16.5	23.05	47	49.836	52.2281	28.8602	6.91447	10.6377
						2016	5	3	123	31.3	21.1	26.2	47.5	55.0022	44.8818	28.1061	7.25305	9.59054
						2016	5	4	124	28.2	18.1	23.15	59	56.4637	45.6226	28.7111	6.89559	8.97536
						2016	5	5	125	23.8	15.4	19.6	72.5	61.4889	41.3206	28.5139	6.25455	7.62319
						2016	5	6	126	21.9	12.7	17.3	63.5	55.0448	40.513	26.7135	5.49928	7.07368
						2016	5	7	127	18.2	8.2	13.2	59	53.0198	42.4158	26.8261	4.87739	6.45808
						2016	5	8	128	19	11.3	15.15	38.5	59.7841	36.827	26.5431	5.12949	7.05807
						2016	5	9	129	23.7	11.1	17.4	24.5	47.1195	47.4964	26.7612	5.5248	11.2625
						2016	5	10	130	27.5	13.7	20.6	42	45.0686	49.7557	26.7876	6.03299	10.3631
						2016	5	11	131	29.2	17.7	23.45	50	49.0168	45.0954	26.5958	6.43436	8.92105
						2016	5	12	132	28.8	17.1	22.95	62	48.3764	45.2803	26.4757	6.32765	8.88053
						2016	5	13	133	28.6	13.4	21	37.5	40.9783	49.8296	25.5621	5.81695	11.0654
						2016	5	14	134	27.1	14.5	20.8	34.5	44.0593	44.4118	25.0232	5.66497	10.2301
						2016	5	15	135	30.4	16.8	23.6	37	42.6207	46.3713	25.1484	6.1063	10.8908
						2016	5	16	136	31.6	19.7	25.65	32.5	45.7197	43.5252	25.2346	6.43065	11.1534
						2016	5	17	137	32.1	19.8	25.95	50.5	43.5331	42.8365	24.4282	6.26813	8.82568
						2016	5	18	138	30.2	17.2	23.7	55	45.42	47.2368	26.2022	6.37756	9.36444
						2016	5	19	139	25.2	14.2	19.7	43	46.3098	40.7526	24.5748	5.40491	8.29406
						2016	5	20	140	25.3	14.1	19.7	39	46.7061	41.8487	25.0094	5.5005	8.94813
						2016	5	21	141	27.3	14.9	21.1	36	45.244	44.8821	25.4913	5.8158	10.2131
						2016	5	22	142	29.7	15.8	22.75	47.5	40.8696	45.447	24.3796	5.79811	9.19809
						2016	5	23	143	32	18	25	57	40.7492	45.6391	24.3951	6.12372	9.24752
						2016	5	24	144	25.1	16.5	20.8	58.5	52.1157	35.8556	24.4533	5.53597	6.83445
						2016	5	25	145	26.4	14.4	20.4	52.5	43.2897	41.5581	23.9936	5.3756	7.79748
						2016	5	26	146	24.3	14.6	19.45	49.5	45.1051	35.0016	22.4767	4.9105	6.5382
						2016	5	27	147	26.8	14.1	20.45	57.5	33.774	34.3144	19.2577	4.3202	6.51017
						2016	5	28	148	27.3	15.3	21.3	60.5	39.3336	37.7602	21.8009	4.99941	7.24879
						2016	5	29	149	23.7	14.4	19.05	52	51.8322	38.5632	25.2907	5.46597	7.05073
						2016	5	30	150	25.2	14.1	19.65	45	48.139	42.7474	25.6613	5.63635	8.44549
						2016	5	31	151	28.1	14.7	21.4	48	40.7651	43.7002	23.8759	5.48927	8.58382
						2016	6	1	152	31.5	16.5	24	40	36.3161	43.5794	22.5043	5.51708	9.95693
						2016	6	2	153	31.4	17.6	24.5	44.5	31.425	34.6932	18.6782	4.63387	7.62833
						2016	6	3	154	33.2	20	26.6	27	43.1421	45.558	25.0789	6.53069	12.5482
						2016	6	4	155	33.4	19.1	26.25	25.5	40.3493	46.1596	24.4131	6.30721	12.8497
						2016	6	5	156	31.7	19.2	25.45	41	38.4167	38.4167	21.7318	5.51251	8.91635
						2016	6	6	157	31.8	18.1	24.95	33.5	38.9913	42.7345	23.0913	5.78965	10.7238
						2016	6	7	158	31.2	15.9	23.55	21	37.9359	46.4336	23.742	5.75785	12.9963
						2016	6	8	159	27.6	16.5	22.05	22.5	44.1442	39.2	23.5318	5.49985	10.6104
						2016	6	9	160	30.8	16.3	23.55	20	38.3891	44.5313	23.389	5.67225	12.6129
						2016	6	10	161	25.6	17.6	21.6	25	53.4676	34.2193	24.1967	5.59139	9.01524
						2016	6	11	162	27.8	15.7	21.75	22	41.7533	40.4172	23.2383	5.39037	10.9183
						2016	6	12	163	29.5	15.9	22.7	22	39.3182	42.7782	23.1997	5.51069	11.725
						2016	6	13	164	31.8	17.4	24.6	27	38.1256	43.9207	23.1482	5.75641	11.7719
						2016	6	14	165	35.5	21.2	28.35	31.5	38.8684	44.4654	23.5171	6.36537	11.9328
						2016	6	15	166	34.1	21	27.55	37	39.6191	41.5208	22.9435	6.10246	10.379
						2016	6	16	167	33.1	21.9	27.5	38	40.3388	36.1435	21.5999	5.73876	8.98392
						2016	6	17	168	31.5	19.9	25.7	57.5	39.2761	36.4482	21.4031	5.46052	7.54382
						2016	6	18	169	34.5	21.7	28.1	51.5	40.4807	41.4523	23.1725	6.23813	8.80039
						2016	6	19	170	34.3	24.4	29.35	56	46.5193	36.8433	23.4191	6.47621	7.98725
						2016	6	20	171	34.9	25.6	30.25	49	45.8221	34.0916	22.3582	6.30083	7.60531
						2016	6	21	172	38	26	32	39.5	36.3156	34.863	20.1282	5.87897	8.96936
						2016	6	22	173	38.5	28.4	33.45	37.5	38.7263	31.2909	19.6919	5.91901	8.42011
						2016	6	23	174	36.1	28.1	32.1	39	51.1009	32.7046	23.1256	6.76803	8.50638
						2016	6	24	175	35.9	28.4	32.15	39.5	48.0182	28.8109	21.0405	6.16396	7.51156
						2016	6	25	176	36	26.8	31.4	42	44.5364	32.7788	21.6137	6.23681	8.15093
						2016	6	26	177	35.7	26.8	31.25	44.5	46.2948	32.9619	22.0977	6.35704	7.91883
						2016	6	27	178	36.3	23.9	30.1	45.5	37.8914	37.5882	21.3487	5.99756	8.73699
						2016	6	28	179	35.9	23.5	29.7	34.5	32.8387	32.576	18.5019	5.15441	8.72133
						2016	6	29	180	32	19.9	25.95	30	34.9676	33.8486	19.4616	4.99372	9.07718
						2016	6	30	181	35.1	20.8	27.95	30	24.8917	28.4762	15.0606	4.04113	7.92804
						2016	7	1	182	32.3	20.3	26.3	17	33.516	32.1754	18.5765	4.80474	9.95319
						2016	7	2	183	35	21.1	28.05	26.5	29.9901	33.349	17.8898	4.81075	9.56129
						2016	7	3	184	36.4	23.2	29.8	36	26.354	27.8298	15.3198	4.27689	7.40355
						2016	7	4	185	36.3	22.9	29.6	51	30.9191	33.1453	18.1092	5.03437	7.2493
						2016	7	5	186	35.8	23.2	29.5	45	28.1132	28.3381	15.9667	4.4294	6.6998
						2016	7	6	187	35.2	23.9	29.55	47.5	28.3481	25.6267	15.247	4.2342	5.90273
						2016	7	7	188	37.4	22.3	29.85	53.5	24.6719	29.8037	15.3395	4.28689	6.58033
						2016	7	8	189	36.4	23.4	29.9	52	23.1012	24.0252	13.3268	3.72831	5.39114
						2016	7	9	190	35.7	22.2	28.95	50	7.50185	8.10199	4.41017	1.20922	2.08118
						2016	7	10	191	34.9	22.4	28.65	51.5	18.8845	18.8845	10.6827	2.91028	4.26771
						2016	7	11	192	35.6	22.4	29	54	29.7335	31.3986	17.2844	4.74424	6.84233
						2016	7	12	193	35.7	22.9	29.3	35	23.7301	24.2996	13.5839	3.75243	6.57021
						2016	7	13	194	36.9	22.8	29.85	36.5	12.8704	14.5179	7.73255	2.16099	4.08738
						2016	7	14	195	35.6	24.2	29.9	29	25.0427	22.8389	13.5286	3.78477	6.69011
						2016	7	15	196	36.2	23	29.6	27	23.1416	24.4375	13.4524	3.73978	7.25104
						2016	7	16	197	36.8	22.7	29.75	33.5	10.3776	11.7059	6.23486	1.73878	3.51338
						2016	7	17	198	36.2	23.7	29.95	37.5	4.15306	4.15306	2.34933	0.657937	1.51979
						2016	7	18	199	36.4	23.2	29.8	29	2.09167	2.2088	1.2159	0.339449	1.15237
						2016	7	19	200	34.6	22.9	28.75	32	3.15966	2.95744	1.72923	0.472107	1.29264
						2016	7	20	201	36.5	22.1	29.3	33.5	3.16185	3.64245	1.91974	0.530312	1.45239
						2016	7	21	202	34.8	20.4	27.6	25	5.51686	6.35542	3.3496	0.891901	2.30201
						2016	7	22	203	34.3	20.2	27.25	24	10.8104	12.1941	6.49487	1.71606	3.91677
						2016	7	23	204	34	19.6	26.8	30	11.1923	12.8936	6.7955	1.77756	3.82895
						2016	7	24	205	37	23.3	30.15	49	2.25535	2.47186	1.33565	0.375621	0.957841
						2016	7	25	206	36.2	24.4	30.3	52.5	3.88671	3.66906	2.13621	0.602638	1.19415
						2016	7	26	207	37	23.3	30.15	57	1.70035	1.86358	1.00697	0.283188	0.818431
						2016	7	27	208	36.6	23.9	30.25	46.5	40.7103	41.3617	23.2127	6.54165	9.45506
						2016	7	28	209	36.1	23.4	29.75	35.5	39.1682	39.7949	22.3335	6.22837	10.4201
						2016	7	29	210	36.2	23	29.6	32.5	39.4997	41.7117	22.9615	6.38332	11.2647
						2016	7	30	211	36.2	24.2	30.2	49	39.7052	38.117	22.0069	6.19537	8.4468
						2016	7	31	212	36.2	23.9	30.05	51.5	40.3597	39.7139	22.6475	6.3558	8.64427
						2016	8	1	213	36.7	25	30.85	50	41.1176	38.4861	22.503	6.42084	8.46346
						2016	8	2	214	36.8	26.9	31.85	50	46.259	36.6371	23.2881	6.78143	8.16163
						2016	8	3	215	36	26.4	31.2	53	46.9256	36.0388	23.263	6.68543	7.9823
						2016	8	4	216	36.6	24.4	30.5	52	39.4683	38.5211	22.0571	6.24833	8.43908
						2016	8	5	217	36	23.2	29.6	53.5	40.1121	41.0748	22.9615	6.38332	8.88072
						2016	8	6	218	36.7	24.6	30.65	54.5	39.5408	38.2755	22.0069	6.25346	8.4016
						2016	8	7	219	34.6	23.2	28.9	41.5	40.9227	37.3215	22.1074	6.05511	9.01965
						2016	8	8	220	36	22.7	29.35	43.5	37.1552	39.5331	21.6803	5.99535	9.33198
						2016	8	9	221	36.8	25.2	31	45	39.1162	36.2999	21.316	6.1009	8.59301
						2016	8	10	222	36.6	25.5	31.05	42	41.3542	36.7225	22.0446	6.31588	9.03987
						2016	8	11	223	35.6	23.8	29.7	31.5	39.309	37.1077	21.6049	6.01886	10.2074
						2016	8	12	224	35.9	24.6	30.25	40.5	42.131	38.0864	22.66	6.3859	9.45603
						2016	8	13	225	35.4	23.3	29.35	27.5	37.487	36.2875	20.8638	5.76957	10.4039
						2016	8	14	226	36.8	22.8	29.8	44	38.0188	42.5811	22.7605	6.35415	10.001
						2016	8	15	227	36.7	22.8	29.75	46	35.3547	39.3145	21.0899	5.88157	9.02062
						2016	8	16	228	36	22.8	29.4	45.5	38.0951	40.2285	22.145	6.13037	9.24516
						2016	8	17	229	33.6	22.9	28.25	45	41.9761	35.9315	21.9692	5.93351	8.24873
						2016	8	18	230	33	21.7	27.35	45.5	41.8741	37.8542	22.5219	5.9639	8.51093
						2016	8	19	231	37.1	23.4	30.25	44	36.9269	40.4719	21.8687	6.16289	9.57645
						2016	8	20	232	37.2	23.6	30.4	55.5	38.0629	41.4125	22.4591	6.34902	9.03012
						2016	8	21	233	37.4	22.9	30.15	38	36.1824	41.9716	22.0446	6.19952	10.6848
						2016	8	22	234	36.6	23.1	29.85	41	34.9132	37.7062	20.5247	5.73597	9.26648
						2016	8	23	235	36.3	23.2	29.75	51	35.4856	37.1889	20.5498	5.73094	8.09496
						2016	8	24	236	36.2	22.2	29.2	52.5	34.6408	38.7976	20.7382	5.71659	8.37364
						2016	8	25	237	37.2	26.1	31.65	52.5	38.5737	34.2535	20.5624	5.96358	7.64381
						2016	8	26	238	36.8	24.4	30.6	46.5	34.5561	34.2797	19.4695	5.52674	7.94414
						2016	8	27	239	36.1	22.8	29.45	41	36.3371	38.6627	21.203	5.87579	9.44628
						2016	8	28	240	36.3	21.8	29.05	33.5	34.3475	39.8431	20.9266	5.75012	10.5934
						2016	8	29	241	35.8	20.1	27.95	37.5	33.2366	41.7452	21.0711	5.65387	10.4222
						2016	8	30	242	35.2	20.5	27.85	40.5	34.8297	40.9597	21.3663	5.72054	9.8509
						2016	8	31	243	36.4	20.9	28.65	37.5	34.2978	42.5293	21.6049	5.88581	10.6999
						2016	9	1	244	35	20.4	27.7	44.5	34.7228	40.5562	21.2281	5.66488	9.25003
						2016	9	2	245	35.9	23.1	29.5	59	36.1843	37.0527	20.7131	5.74611	8.04404
						2016	9	3	246	34.4	23.1	28.75	59.5	37.4134	33.8217	20.1227	5.49382	7.31573
						2016	9	4	247	32.3	20.9	26.6	56.5	35.4121	32.2958	19.1304	4.98167	6.816
						2016	9	5	248	31.6	19.9	25.75	45.5	34.1518	31.9661	18.6908	4.77401	7.10011
						2016	9	6	249	32.1	19.9	26	30.5	34.7933	33.9582	19.4444	4.99502	9.06067
						2016	9	7	250	34.3	19.4	26.85	22	29.4496	35.1039	18.1883	4.76302	10.3564
						2016	9	8	251	35	21.7	28.35	32	33.0974	35.2156	19.3125	5.22732	9.5079
						2016	9	9	252	35.1	21.4	28.25	41	30.9244	33.8932	18.3139	4.94629	8.22285
						2016	9	10	253	36.4	22.3	29.35	58.5	34.0368	38.3935	20.4493	5.65494	8.30529
						2016	9	11	254	36.2	21.7	28.95	60.5	32.626	37.8462	19.8778	5.45026	8.15488
						2016	9	12	255	36	22.2	29.1	74	31.425	34.6932	18.6782	5.13779	7.5243
						2016	9	13	256	34.6	21.5	28.05	37.5	36.3315	38.0754	21.0397	5.65778	9.56158
						2016	9	14	257	30.5	19.9	25.2	24	40.2687	34.1479	20.9769	5.29026	9.65766
						2016	9	15	258	30.5	19.4	24.95	26	38.3145	34.0233	20.4242	5.12093	9.38885
						2016	9	16	259	32.1	18.9	25.5	36	35.1348	37.1024	20.4242	5.18681	9.17973
						2016	9	17	260	31.8	19	25.4	46.5	34.8457	35.682	19.9469	5.0539	7.7299
						2016	9	18	261	31.7	20.6	26.15	23	38.3381	34.0442	20.4367	5.26791	9.86406
						2016	9	19	262	32	20.3	26.15	29	33.9682	31.7943	18.5903	4.79196	8.67771
						2016	9	20	263	33.1	20.3	26.7	20.5	31.5104	32.2666	18.0376	4.70768	9.69332
						2016	9	21	264	32.2	19.8	26	20	31.7916	31.5373	17.912	4.60136	9.44377
						2016	9	22	265	28.5	17.2	22.85	16	33.6768	30.4438	18.113	4.31835	9.0459
						2016	9	23	266	27.8	18.5	23.15	17	36.4524	27.1206	17.7864	4.27179	8.08533
						2016	9	24	267	23.6	15.8	19.7	27	42.6706	26.6265	19.0676	4.19368	6.71451
						2016	9	25	268	24.5	14.5	19.5	33.5	35.501	28.4008	17.9622	3.9295	6.60182
						2016	9	26	269	26.2	14	20.1	38.5	29.6574	28.9457	16.5742	3.68418	6.41462
						2016	9	27	270	28.9	15.4	22.15	49	28.7168	31.0142	16.882	3.95556	6.20611
						2016	9	28	271	29.3	16.5	22.9	56	30.7972	31.5364	17.6294	4.20823	6.29851
						2016	9	29	272	28.5	15.1	21.8	60	30.2821	32.4625	17.7361	4.11929	6.34526
						2016	9	30	273	27.9	15.8	21.85	58	30.0619	29.0999	16.7313	3.89081	5.7331
						2016	10	1	274	29	15.4	22.2	49.5	28.1427	30.6193	16.6056	3.89568	6.09444
						2016	10	2	275	28.6	16.2	22.4	51.5	30.2756	30.0334	17.0578	4.02178	5.96431
						2016	10	3	276	30	17.5	23.75	49.5	30.8648	30.8648	17.4598	4.25479	6.30614
						2016	10	4	277	31.6	18.6	25.1	39.5	24.5825	25.5658	14.1814	3.56815	6.17128
						2016	10	5	278	31.6	18.9	25.25	19	24.8491	25.2467	14.1688	3.57746	7.67056
						2016	10	6	279	31.9	18.6	25.25	21	27.9417	29.73	16.3042	4.11661	8.75174
						2016	10	7	280	31.5	18.3	24.9	40	21.5217	22.7269	12.5108	3.13314	5.48691
						2016	10	8	281	30	17.4	23.7	42.5	28.2429	28.4689	16.0404	3.90419	6.42303
						2016	10	9	282	28.6	17.3	22.95	37.5	23.8213	21.5344	12.8122	3.0621	5.21975
						2016	10	10	283	28.5	16.6	22.55	38.5	28.9707	27.5801	15.9902	3.78411	6.43098
						2016	10	11	284	29.3	16.1	22.7	33.5	26.967	28.4771	15.6761	3.72359	7.05048
						2016	10	12	285	28.6	16.2	22.4	46.5	26.5079	26.2958	14.935	3.52128	5.53387
						2016	10	13	286	30.3	16.7	23.5	46	19.1592	20.8452	11.3049	2.73832	4.58781
						2016	10	14	287	29.4	17.6	23.5	35.5	22.0313	20.7976	12.1088	2.93305	5.2279
						2016	10	15	288	30	16.9	23.45	19.5	24.8789	26.0731	14.4075	3.48562	7.64464
						2016	10	16	289	27.5	17.2	22.35	20.5	26.0272	21.4464	13.3649	3.14716	6.20603
						2016	10	17	290	26.5	13.9	20.2	48	21.6964	21.87	12.3223	2.74628	4.38421
						2016	10	18	291	27.7	15.3	21.5	60.5	23.5428	23.3544	13.2644	3.05737	4.64622
						2016	10	19	292	27.4	16	21.7	66	24.3211	22.1809	13.1388	3.04383	4.44878
						2016	10	20	293	25	13.8	19.4	71	25.4756	22.8262	13.6412	2.97622	4.35598
						2016	10	21	294	25.7	12.8	19.25	79.5	24.3935	25.1741	14.0181	3.0461	4.75031
						2016	10	22	295	26.4	15	20.7	53.5	14.3578	13.0943	7.75642	1.75142	2.72935
						2016	10	23	296	27	16.2	21.6	40.5	21.9537	18.968	11.5436	2.6675	4.37543
						2016	10	24	297	27.2	16.1	21.65	37.5	25.7315	22.8496	13.7166	3.17367	5.38258
						2016	10	25	298	27.8	16.8	22.3	37.5	24.3096	21.3925	12.9001	3.03394	5.12929
						2016	10	26	299	26.8	18.5	22.65	36.5	27.7404	18.4196	12.7871	3.0336	4.56259
						2016	10	27	300	25.2	13.7	19.45	53.5	22.965	21.1278	12.4605	2.72226	4.06363
						2016	10	28	301	24.9	14.4	19.65	62.5	10.0302	8.42537	5.20025	1.14221	1.84861
						2016	10	29	302	21.3	15.8	18.55	48	28.2865	12.4461	10.614	2.26284	2.56268
						2016	10	30	303	24.6	13.2	18.9	37.5	7.81252	7.12502	4.2205	0.908443	1.87705
						2016	10	31	304	23.4	15.8	19.6	51	22.8387	13.8859	10.0739	2.20972	2.80549
						2016	11	1	305	21.1	12.9	17	53	25.5787	16.7796	11.7194	2.39196	3.10759
						2016	11	2	306	16.5	9.8	13.15	51	41.1876	22.0766	17.0578	3.09637	3.49964
						2016	11	3	307	15.5	8.2	11.85	48	24.4074	14.2539	10.5512	1.83483	2.3
						2016	11	4	308	15.7	6.6	11.15	53	24.5412	17.866	11.845	2.01119	2.63777
						2016	11	5	309	18.8	7.2	13	69.5	16.2504	15.0804	8.8555	1.59968	2.47131
						2016	11	6	310	20.4	8.4	14.4	48.5	20.0566	19.2543	11.1165	2.09938	3.3103
						2016	11	7	311	22.6	12.1	17.35	36	1.98666	1.66879	1.03	0.21234	0.749923
						2016	11	8	312	21	10.1	15.55	28.5	7.13366	6.22055	3.7683	0.737071	1.71409
						2016	11	9	313	21.5	11.7	16.6	22.5	14.8712	11.659	7.44867	1.50281	3.11861
						2016	11	10	314	21	12.5	16.75	21.5	14.0561	9.55816	6.55684	1.32865	2.68058
						2016	11	11	315	21.8	15.1	18.45	26	19.7749	10.5993	8.18977	1.7412	2.91361
						2016	11	12	316	22.7	11.7	17.2	18.5	15.5279	13.6645	8.24002	1.69147	3.78275
						2016	11	13	317	22.4	12.5	17.45	23.5	21.5576	17.0736	10.8527	2.2437	4.40402
						2016	11	14	318	20.2	12.9	16.55	25.5	25.4825	14.8818	11.016	2.21931	3.72582
						2016	11	15	319	21.9	12.3	17.1	21	20.777	15.9567	10.3	2.1083	4.21491
						2016	11	16	320	21.4	11.9	16.65	19.5	8.71101	6.62037	4.29586	0.867976	2.03942
						2016	11	17	321	18.4	10.2	14.3	22.5	18.8619	12.3734	8.64197	1.62699	3.04795
						2016	11	18	322	15.4	6.7	11.05	25	4.92398	3.42709	2.32378	0.393197	0.984582
						2016	11	19	323	14.6	3.5	9.05	56.5	16.0704	14.2705	8.5666	1.34903	1.9085
						2016	11	20	324	17.9	6	11.95	88	20.7551	19.7589	11.4556	1.99882	3.00331
						2016	11	21	325	18.5	8.3	13.4	81.5	15.5108	12.6568	7.92599	1.45036	2.15698
						2016	11	22	326	17.5	9.7	13.6	73.5	2.0239	1.26291	0.904392	0.166554	0.494262
						2016	11	23	327	15.1	8.3	11.7	80	19.4483	10.5799	8.11441	1.40393	1.72111
						2016	11	24	328	17.2	5.8	11.5	76	21.1589	19.2969	11.4305	1.96427	2.87715
						2016	11	25	329	15.9	5.9	10.9	54.5	22.3433	17.8746	11.3049	1.9029	2.60465
						2016	11	26	330	15.5	3.3	9.4	56	3.23658	3.15891	1.80878	0.288552	0.626857
						2016	11	27	331	16.3	4.2	10.25	46	9.11786	8.82609	5.07464	0.834846	1.45219
						2016	11	28	332	15.1	4.1	9.6	40.5	16.6877	14.6852	8.8555	1.42309	2.30481
						2016	11	29	333	14.1	4.1	9.1	46.5	20.8537	16.683	10.5512	1.66465	2.30732
						2016	11	30	334	12.4	6.7	9.55	61.5	26.3061	11.9956	10.0488	1.61191	1.69859
						2016	12	1	335	11.5	4.9	8.2	79	22.4911	11.8753	9.2449	1.40975	1.53016
						2016	12	2	336	7.3	4.7	6	87.5	31.3548	6.52179	8.08928	1.12916	0.762758
						2016	12	3	337	9.4	5.6	7.5	72.5	32.0572	9.74539	9.99856	1.48363	1.22299
						2016	12	4	338	13.3	3.2	8.25	45	17.5142	14.1515	8.90575	1.36065	1.91417
						2016	12	5	339	12.2	6.1	9.15	52	22.1232	10.7961	8.74246	1.38185	1.51352
						2016	12	6	340	11.8	7.4	9.6	61.5	27.209	9.57756	9.13185	1.4675	1.41149
						2016	12	7	341	10.9	0.9	5.9	51	8.93731	7.14985	4.52196	0.628555	0.808597
						2016	12	8	342	9.6	1.5	5.55	40.5	16.8264	10.9035	7.66221	1.04932	1.23549
						2016	12	9	343	10.5	2.8	6.65	49.5	14.2024	8.7487	6.30562	0.904221	1.03943
						2016	12	10	344	11.4	0.7	6.05	78.5	17.568	15.0382	9.19465	1.28615	1.52608
						2016	12	11	345	13.9	2.7	8.3	77.5	17.4998	15.6799	9.37051	1.4344	1.96231
						2016	12	12	346	14	3.4	8.7	63	18.2294	15.4586	9.49612	1.47591	1.99698
						2016	12	13	347	10.8	4.7	7.75	72	25.4926	12.4404	10.0739	1.50958	1.53447
						2016	12	14	348	8.1	5.8	6.95	82.5	41.6195	7.65798	10.099	1.46596	0.956812
						2016	12	15	349	6.8	0	3.4	90.5	22.9406	12.4797	9.57148	1.1901	0.83459
						2016	12	16	350	6.1	-1.7	2.2	87	13.1835	8.22649	5.89111	0.691027	0.409061
						2016	12	17	351	4.6	-1.4	1.6	80.5	26.5054	12.7226	10.3879	1.18195	0.442593
						2016	12	18	352	4.9	-0.5	2.2	86	26.081	11.267	9.69709	1.13747	0.529621
						2016	12	19	353	4.9	-0.1	2.4	91.5	20.7846	8.31383	7.43611	0.880978	0.444853
						2016	12	20	354	6.4	-1.5	2.45	89	13.4629	8.50854	6.0544	0.719059	0.461294
						2016	12	21	355	7.5	-2	2.75	75	3.56591	2.71009	1.75854	0.211949	0.23054
						2016	12	22	356	1.1	-1.3	-0.1	77	29.6959	5.70161	7.36075	0.764123	-0.0162107
						2016	12	23	357	4.3	-0.9	1.7	84.5	23.3417	9.71014	8.51636	0.973995	0.372376
						2016	12	24	358	6.3	3	4.65	66	8.08144	2.1335	2.34891	0.309279	0.309831
						2016	12	25	359	8.6	5	6.8	72	5.54444	1.5968	1.68317	0.242847	0.356503
						2016	12	26	360	7.5	5.2	6.35	91.5	11.699	2.15262	2.83879	0.402085	0.391175
						2016	12	27	361	6.4	3.7	5.05	88.5	38.1264	8.23529	10.0237	1.34333	0.806197
						2016	12	28	362	7.4	5.4	6.4	61	40.9126	6.54601	9.25746	1.31394	0.800647
						2016	12	29	363	9.7	2.4	6.05	54.5	22.141	12.9304	9.57148	1.33886	1.33827
						2016	12	30	364	7	3.4	5.2	63.5	23.6259	6.80427	7.17233	0.967512	0.70978
						2016	12	31	365	5.5	3.5	4.5	65	40.3574	6.45719	9.13185	1.19435	0.611453
										6.1	2.5					9.18209
																	1329.62	2101.45
																	ETo-HS	ETo-TURC (Ousman Couly (2016)

## Sheet: 2017
	KİLİS PROVİNCE					year	month	day	DOY	Tmax	Tmin	Tmean	RHmean	Ra	Rs=0.16(Tmax-Tmin)^0.5*Ra	Rs=from meteorological station	ETo-HS	ETo-TURC (Ousman Couly (2016)
	DOY	246					#	#		°C	°C	°C	%	MJ m-2 day-1*(0.408 mm day-1)
	φ (-)	36.71	0.64071			2017	1	1	1	9.2	2.2	5.7	77	21.024	11.7734	8.89989	1.22665	1.18342
	tan(φ)		0.745649			2017	1	2	2	5.5	3.3	4.4	84	8.76855	1.54327	2.08094	0.270945	0.255452
	sin(φ)		0.597765			2017	1	3	3	7.8	3.1	5.45	82	14.0697	5.29019	4.88037	0.665493	0.609723
	cos(φ)		0.801671			2017	1	4	4	5.5	1	3.25	84	11.0297	3.97068	3.7436	0.462178	0.334583
	dr	0.984766		(1+0.033*cos(2*3.14/365*DOY))		2017	1	5	5	5.4	3.8	4.6	81.5	5.90028	0.755236	1.19413	0.15688	0.207005
	δ	0.120494		(0.409*sin(2*3.14/365*DOY-1.39))		2017	1	6	6	10.1	4.6	7.35	75.5	28.5387	12.557	10.7087	1.57958	1.49321
	tan(δ)	0.121081				2017	1	7	7	9.8	4.6	7.2	66.5	23.4128	9.73974	8.54232	1.25252	1.18937
	sin(δ)	0.120203				2017	1	8	8	8.5	4.4	6.45	79	7.54234	2.47389	2.44353	0.347535	0.425431
	cos(δ)	0.992749				2017	1	9	9	6.6	3	4.8	84	8.78973	2.53144	2.66838	0.35369	0.347308
	X	0.991849				2017	1	10	10	7.6	-0.1	3.75	77	23.4416	14.44	10.4076	1.31543	1.02486		-
	ωs (eq. 25)	1.49314		(acos{(-1*tan(-0.35)*tan(0.409*sin(2*3.14/365*DOY-1.39))))		2017	1	11	11	9.9	3.5	6.7	60.5	26.5647	13.6011	10.7526	1.54507	1.50186
	sin ωs	0.996986				2017	1	12	12	10.1	2.7	6.4	63.5	22.5825	13.3689	9.82898	1.39506	1.4332
	sin φ*sin δ	-0.0718532		(sin(0.35)*sin(0.409*sin(2*3.14/365*DOY-1.39)))		2017	1	13	13	11.4	3.7	7.55	60	24.676	15.2004	10.9557	1.62887	1.7946
	cos φ*cos δ	0.795859		(cos(0.35)*cos(0.409*sin(2*3.14/365*DOY-1.39))		2017	1	14	14	5.6	0.9	3.25	50.5	12.3025	4.62574	4.26739	0.526845	0.370746
	Gsc	0.082				2017	1	15	15	7.8	2.1	4.95	56	15.0931	6.88247	5.7655	0.769283	0.690138
						2017	1	16	16	8.9	0.2	4.55	72	21.9512	15.278	10.3595	1.35795	1.25307
	Ra	25.4105				2017	1	17	17	9.9	3.2	6.55	66.5	23.1283	12.3968	9.5786	1.36795	1.36499
						2017	1	18	18	12	3.7	7.85	65	24.5295	16.2876	11.307	1.70099	1.95719
						2017	1	19	19	15.1	5.2	10.15	53.5	24.4868	19.3936	12.3274	2.02078	2.6878
						2017	1	20	20	12.6	3.4	8	55.5	19.6554	14.4663	9.53882	1.44339	1.78521
						2017	1	21	21	12	4.2	8.1	53.5	25.1432	15.6894	11.2354	1.7067	1.93264
						2017	1	22	22	12	1.8	6.9	28.5	27.6982	22.6017	14.1537	2.05039	3.1524
						2017	1	23	23	11.9	2.1	7	33	28.4918	22.3376	14.271	2.07574	2.9946
						2017	1	24	24	11.1	1.8	6.45	33.5	25.9663	19.3189	12.6699	1.80199	2.46608
						2017	1	25	25	8.5	5.4	6.95	47	21.8722	5.4243	6.16159	0.894409	0.769175
						2017	1	26	26	6.9	3.4	5.15	76.5	11.0923	3.10585	3.32029	0.446917	0.411671
						2017	1	27	27	8.3	-0.5	3.9	77.5	12.0943	8.51436	5.74038	0.730581	0.678342
						2017	1	28	28	4.6	-4	0.3	63.5	32.4663	22.3368	15.2336	1.61714	0.148477
						2017	1	29	29	5.4	-2.8	1.3	38	34.5692	22.6774	15.8386	1.77426	0.717321
						2017	1	30	30	3.6	-1.8	0.9	57	28.6711	12.3859	10.6601	1.16915	0.254011
						2017	1	31	31	3.5	-3.3	0.1	59	14.7458	8.02172	6.15238	0.645898	0.0207592
						2017	2	1	32	5	-5.6	-0.3	33	29.8423	25.3062	15.5455	1.59555	-0.215416
						2017	2	2	33	11.7	-0.3	5.7	22	29.4458	28.2679	16.3205	2.24941	3.62799
						2017	2	3	34	12.6	0	6.3	35.5	28.8534	29.0842	16.3871	2.31626	3.45046
						2017	2	4	35	9.9	0.3	5.1	60	22.8429	17.5433	11.3242	1.52093	1.54429
						2017	2	5	36	9.3	4.7	7	51	19.2548	7.08576	6.6075	0.961075	0.905064
						2017	2	6	37	10.2	4.7	7.45	57.5	18.6144	8.19035	6.98475	1.03438	1.05757
						2017	2	7	38	14.1	6	10.05	56.5	20.7415	13.4405	9.44503	1.54275	1.93155
						2017	2	8	39	13.7	6.2	9.95	48.5	25.4223	15.2534	11.1395	1.813	2.19006
						2017	2	9	40	12	7	9.5	54.5	25.4272	10.1709	9.09709	1.45658	1.47381
						2017	2	10	41	15	4.5	9.75	58	26.6689	22.4019	13.8267	2.23413	2.99098
						2017	2	11	42	15.2	4.8	10	54.5	27.777	23.1105	14.3325	2.33687	3.12486
						2017	2	12	43	10.8	6.4	8.6	56.5	20.0169	7.04594	6.71804	1.04019	1.03205
						2017	2	13	44	12	4.4	8.2	53	26.3082	15.9954	11.6043	1.76954	1.9816
						2017	2	14	45	8.8	2.2	5.5	49	19.9506	10.5339	8.20066	1.12066	1.06494
						2017	2	15	46	9.2	1.8	5.5	48.5	37.6289	22.2763	16.3779	2.23811	2.06999
						2017	2	16	47	7.8	0.5	4.15	21.5	43.546	25.4308	18.8248	2.42344	2.6016
						2017	2	17	48	9.8	-2.6	3.6	25.5	33.5841	33.3154	18.9219	2.37491	2.86784
						2017	2	18	49	9.9	-1.8	4.05	28.5	34.0432	31.8644	18.6313	2.38761	2.9251
						2017	2	19	50	12.7	0.5	6.6	25.5	32.8034	32.0161	18.3324	2.62347	4.36132
						2017	2	20	51	13.8	2	7.9	28	31.4746	29.712	17.299	2.60749	4.4699
						2017	2	21	52	15.7	2.8	9.25	27.5	30.596	31.5751	17.5825	2.78943	5.26036
						2017	2	22	53	16.4	4.1	10.25	36	31.1446	30.6463	17.4765	2.87512	4.9435
						2017	2	23	54	18	5.9	11.95	45.5	32.087	31.0603	17.8584	3.116	4.84971
						2017	2	24	55	17.4	5.7	11.55	60.5	25.2788	23.661	13.8347	2.38147	3.47274
						2017	2	25	56	18.4	5.3	11.85	52	32.9948	34.5785	19.1074	3.32272	5.01683
						2017	2	26	57	19.5	6.2	12.85	39	28.7461	30.5859	16.7735	3.01525	5.40821
						2017	2	27	58	19.7	8.4	14.05	30.5	25.9099	23.4226	13.9356	2.60317	4.8907
						2017	2	28	59	19.5	10.9	15.2	25.5	28.0839	19.3218	13.1773	2.55041	4.51008
						2017	3	1	60	16.6	11.2	13.9	37	21.8051	9.41982	8.10729	1.50731	2.03483
						2017	3	2	61	15.4	8.8	12.1	57.5	24.7758	13.0816	10.184	1.78591	2.09996
						2017	3	3	62	9.8	7.3	8.55	83.5	7.64636	1.52927	1.93439	0.298947	0.407341
						2017	3	4	63	14.2	5.5	9.85	72.5	27.5778	19.1942	13.0149	2.11059	2.61534
						2017	3	5	64	18.9	7.1	13	49.5	36.7699	34.7108	20.2094	3.65067	5.33452
						2017	3	6	65	20.3	9.4	14.85	41.5	38.9323	33.949	20.5657	3.93817	6.23287
						2017	3	7	66	20.2	9.4	14.8	40	34.3902	29.7131	18.0828	3.45742	5.59588
						2017	3	8	67	20.6	10.2	15.4	39.5	35.7261	29.7241	18.4341	3.58945	5.74548
						2017	3	9	68	20.3	12	16.15	35.5	36.5839	24.2917	16.8636	3.35782	5.11844
						2017	3	10	69	18.9	12.3	15.6	32	20.4936	10.8206	8.42383	1.65015	2.56505
						2017	3	11	70	16.7	8.2	12.45	60	10.7494	7.30961	5.01435	0.889627	1.3216
						2017	3	12	71	15.3	7.1	11.2	70	18.6088	12.2074	8.52599	1.45014	1.89467
						2017	3	13	72	14.1	7.2	10.65	77	26.6541	14.713	11.2023	1.86921	2.16278
						2017	3	14	73	13.9	5.2	9.55	70	30.2812	21.0757	14.2906	2.29233	2.79356
						2017	3	15	74	12.6	4.6	8.6	65.5	26.1537	16.7384	11.8358	1.83261	2.12697
						2017	3	16	75	13.3	6.9	10.1	54	28.8373	14.7647	11.6725	1.91002	2.10247
						2017	3	17	76	9.4	6.4	7.9	73	13.2351	3.17642	3.66781	0.552851	0.563208
						2017	3	18	77	14.5	6.4	10.45	59.5	41.6559	26.9931	18.9688	3.14287	3.70195
						2017	3	19	78	16.7	5.4	11.05	40	44.8798	40.5713	24.1385	4.08436	6.41125
						2017	3	20	79	16.4	6.3	11.35	56.5	35.5949	28.7607	18.0996	3.09439	4.11947
						2017	3	21	80	18.2	8.7	13.45	60	37.8462	28.7631	18.664	3.42076	4.52169
						2017	3	22	81	15.8	6.3	11.05	67.5	30.5565	23.2229	15.069	2.54976	3.32857
						2017	3	23	82	17	5.6	11.3	53	45.0452	41.0812	24.3344	4.15319	5.75015
						2017	3	24	83	20.5	9	14.75	30.5	45.0588	41.4541	24.4483	4.66732	8.557
						2017	3	25	84	21.9	11.1	16.5	28	45.8488	39.6133	24.1079	4.84978	8.90012
						2017	3	26	85	21.4	8.5	14.95	44.5	39.9046	41.1815	22.9318	4.40471	7.222
						2017	3	27	86	19	7.6	13.3	46	36.0709	32.8967	19.4863	3.55433	5.38844
						2017	3	28	87	19.4	8.8	14.1	61.5	30.2723	25.6709	15.7695	2.95037	4.16986
						2017	3	29	88	20.9	9.3	15.1	54	40.0882	37.2018	21.8457	4.21531	6.11047
						2017	3	30	89	21.6	12.4	17	43.5	32.2568	23.741	15.6544	3.19509	4.64906
						2017	3	31	90	16	10	13	72	26.0941	12.5252	10.2267	1.84738	2.10354
						2017	4	1	91	15.8	7.7	11.75	73	31.0682	20.1322	14.1475	2.45191	3.02595
						2017	4	2	92	16.1	8.4	12.25	68	38.5521	23.7481	17.1165	3.01666	3.60074
						2017	4	3	93	20.8	9.1	14.95	46.5	48.5899	45.4801	26.5925	5.10785	7.72911
						2017	4	4	94	22	9	15.5	52.5	44.5541	46.3363	25.7027	5.01986	7.62912
						2017	4	5	95	20.9	11.4	16.15	39.5	53.3172	40.521	26.2935	5.23548	7.87583
						2017	4	6	96	22.3	14	18.15	36	52.5487	34.8924	24.2226	5.10726	7.53235
						2017	4	7	97	20.7	11.4	16.05	49	51.0033	37.9465	24.8863	4.94068	6.50716
						2017	4	8	98	14.7	9.5	12.1	71	25.319	10.5327	9.23778	1.61997	1.74715
						2017	4	9	99	15.2	7.4	11.3	60	41.0262	25.6003	18.3328	3.12888	3.68818
						2017	4	10	100	16.4	7.2	11.8	32.5	52.2952	38.4893	25.3791	4.40591	6.92346
						2017	4	11	101	19.1	8	13.55	39	50.365	44.7241	26.8479	4.93646	7.97
						2017	4	12	102	19.2	11.9	15.55	31.5	39.4664	23.0484	17.0612	3.33713	5.01492
						2017	4	13	103	18.8	12.2	15.5	50.5	20.6076	10.8808	8.47072	1.65437	2.04344
						2017	4	14	104	17.8	12.1	14.95	75	44.9407	20.493	17.1671	3.29744	3.49452
						2017	4	15	105	19.3	10.8	15.05	68.5	35.9517	24.4472	16.7706	3.23111	4.1201
						2017	4	16	106	21.9	9.5	15.7	64.5	35.2495	34.9675	19.8602	3.90208	5.87488
						2017	4	17	107	23	10.7	16.85	58.5	44.0487	43.3439	24.7175	5.02315	7.4513
						2017	4	18	108	21.6	13.3	17.45	46	49.1216	32.6167	22.6429	4.68122	6.11632
						2017	4	19	109	22.4	10.5	16.45	58.5	48.7609	46.4204	26.9132	5.40622	7.86578
						2017	4	20	110	22.8	9.6	16.2	58.5	48.6154	51.3379	28.2606	5.63544	8.59983
						2017	4	21	111	25.5	9.5	17.5	47	36.1201	46.2337	23.1168	4.78598	8.41204
						2017	4	22	112	28.7	15.1	21.9	29	44.3755	48.2806	26.1838	6.09665	12.0476
						2017	4	23	113	25.1	13.1	19.1	40	47.8079	45.8956	26.4978	5.73462	9.52234
						2017	4	24	114	21.3	9.1	15.2	49	50.9282	49.706	28.4616	5.50859	8.19699
						2017	4	25	115	22.9	11.1	17	39	53.7474	50.7375	29.5405	6.02928	10.0672
						2017	4	26	116	25	12.2	18.6	22.5	49.9851	51.1847	28.6131	6.1085	12.7339
						2017	4	27	117	27	14	20.5	16.5	39.2224	40.7913	22.627	5.08268	11.3501
						2017	4	28	118	27	17.8	22.4	27	28.2355	20.7813	13.7028	3.23075	5.64175
						2017	4	29	119	29.5	16.1	22.8	23.5	43.0362	46.1348	25.2062	6.00207	12.431
						2017	4	30	120	29.8	16.7	23.25	25.5	38.9582	40.8282	22.5608	5.4317	10.9176
						2017	5	1	121	26.3	19.4	22.85	25.5	33.5579	18.524	14.1039	3.36254	5.20808
						2017	5	2	122	24.1	12.8	18.45	58.5	20.0021	18.0819	10.7581	2.28723	3.44912
						2017	5	3	123	20.1	12.8	16.45	72	29.6792	17.3327	12.8302	2.57729	3.14931
						2017	5	4	124	23.9	13.9	18.9	59	43.4593	34.7675	21.9889	4.733	6.37014
						2017	5	5	125	24.9	13.2	19.05	62	35.6422	33.3611	19.5064	4.21582	6.1485
						2017	5	6	126	24.9	13.1	19	65	45.9206	43.3491	25.2388	5.44734	7.87165
						2017	5	7	127	22.8	13.2	18	58.5	51.4796	39.5363	25.5206	5.35848	7.03864
						2017	5	8	128	24.2	12.9	18.55	57.5	47.0424	42.5263	25.3016	5.39412	7.64727
						2017	5	9	129	28.7	13.8	21.25	41	35.5477	42.3728	21.9545	5.02821	9.11882
						2017	5	10	130	32.4	19	25.7	24	47.7987	51.2402	27.9955	7.14243	14.3168
						2017	5	11	131	28.3	17.3	22.8	34	56.3177	49.5596	29.8855	7.11632	11.8651
						2017	5	12	132	29.8	17.3	23.55	34	54.4013	54.4013	30.774	7.46325	13.1435
						2017	5	13	133	32.3	18.7	25.5	31	48.1655	52.4041	28.4201	7.21741	13.5235
						2017	5	14	134	32.2	18.5	25.35	28.5	45.1274	49.4597	26.7252	6.76347	13.1234
						2017	5	15	135	31.6	17.7	24.65	32.5	49.444	54.9817	29.4945	7.34322	13.7488
						2017	5	16	136	29.1	19.3	24.2	27	60.5799	47.4946	30.3432	7.47444	12.6073
						2017	5	17	137	29.9	17.7	23.8	24.5	52.5241	51.2635	29.3534	7.16176	13.8412
						2017	5	18	138	30.1	18.1	24.1	28	40.4599	38.8415	22.4252	5.51084	10.279
						2017	5	19	139	29.1	16.4	22.75	37.5	39.871	40.5089	22.7342	5.40677	9.37952
						2017	5	20	140	20.9	12.6	16.75	65	29.6824	19.7091	13.6823	2.77252	3.5651
						2017	5	21	141	22.1	11.2	16.65	59.5	56.3353	49.1244	29.7587	6.01272	8.35207
						2017	5	22	142	22.4	13	17.7	59.5	43.8663	32.9875	21.5187	4.48035	5.88594
						2017	5	23	143	21.8	12.7	17.25	62.5	39.874	29.0283	19.2455	3.95627	5.15984
						2017	5	24	144	24.9	12.7	18.8	53.5	50.7349	49.5173	28.3535	6.08634	8.89844
						2017	5	25	145	26.8	14.4	20.6	46.5	42.9618	42.6181	24.2055	5.45146	8.42082
						2017	5	26	146	29.7	18.1	23.9	38	46.1934	42.8675	25.1727	6.15649	10.0306
						2017	5	27	147	25.4	13.4	19.4	45.5	56.2725	54.0216	31.1894	6.80484	10.4404
						2017	5	28	148	29.3	13.5	21.4	36	47.4148	59.9323	30.1552	6.93292	13.5645
						2017	5	29	149	29.5	15.8	22.65	35	53.4079	58.535	31.629	7.50364	13.729
						2017	5	30	150	27.5	16.4	21.95	31.5	58.1402	51.6285	30.9926	7.22542	12.5069
						2017	5	31	151	26.4	15.5	20.95	47	57.6423	50.2641	30.4491	6.92013	9.8633
						2017	6	1	152	27.5	15.1	21.3	50.5	53.9908	53.5589	30.4194	6.97582	10.1226
						2017	6	2	153	31	17.4	24.2	34.5	51.4233	55.9485	30.3424	7.47423	13.5667
						2017	6	3	154	32.2	19.5	25.85	35.5	53.8986	54.7609	30.7326	7.86776	13.4625
						2017	6	4	155	33.7	19.9	26.8	34	49.7193	54.8901	29.5518	7.73014	13.9137
						2017	6	5	156	35.3	20.5	27.9	35	47.4205	56.1458	29.1888	7.8235	14.2567
						2017	6	6	157	30.9	18.1	24.5	47.5	53.0761	54.35	30.3825	7.53759	11.2398
						2017	6	7	158	33.9	18.5	26.2	38.5	48.6761	59.9689	30.563	7.88709	14.2439
						2017	6	8	159	36.2	22.2	29.2	30.5	51.2617	57.4131	30.6886	8.45947	15.5807
						2017	6	9	160	36.9	24.6	30.75	24	52.3489	51.5113	29.3752	8.36445	15.3167
						2017	6	10	161	30	19.6	24.8	49	58.2773	48.4867	30.0702	7.51301	9.90926
						2017	6	11	162	31.7	19.1	25.4	49.5	52.844	53.2668	30.0124	7.60419	10.8662
						2017	6	12	163	34.2	19.8	27	40.5	50.3965	58.0568	30.5986	8.03984	13.6131
						2017	6	13	164	33	19.7	26.35	47.5	51.4525	54.7455	30.0229	7.77412	11.6286
						2017	6	14	165	26	17.1	21.55	52.5	44.8931	31.9639	21.4286	4.94547	6.22427
						2017	6	15	166	32.3	17.7	25	40.5	48.4475	56.5867	29.6188	7.43498	12.9115
						2017	6	16	167	33.1	20.5	26.8	36	54.0906	54.5234	30.7204	8.03582	13.5027
						2017	6	17	168	32.2	21.8	27	35.5	57.5657	47.8946	29.703	7.80452	12.0246
						2017	6	18	169	30.5	19.9	25.2	52.5	55.7782	47.2999	29.0561	7.3278	9.59786
						2017	6	19	170	29.9	19	24.45	52	52.9309	46.1558	27.9604	6.92847	9.26943
						2017	6	20	171	27.8	18.2	23	56.5	58.4087	44.8578	28.9556	6.92885	8.8089
						2017	6	21	172	28.2	17.2	22.7	50.5	45.4916	40.0326	24.1406	5.73417	7.86251
						2017	6	22	173	30.3	17	23.65	47	53.2464	56.6542	31.0696	7.55316	11.6207
						2017	6	23	174	34.1	20	27.05	32	51.7152	58.3348	31.0705	8.17294	15.1483
						2017	6	24	175	35.5	23.2	29.35	30	55.4432	54.5561	31.1115	8.60341	14.9414
						2017	6	25	176	37.5	24.2	30.85	24	53.1187	56.5183	30.9951	8.8439	16.7652
						2017	6	26	177	37.6	26.1	31.85	23.5	56.0907	51.6034	30.434	8.86231	15.5995
						2017	6	27	178	38.2	22.1	30.15	32.5	48.0209	61.851	30.8293	8.67002	16.5455
						2017	6	28	179	36.1	21.8	28.95	36	50.3759	57.63	30.4797	8.35719	14.6336
						2017	6	29	180	38.5	22.6	30.55	37	46.8159	59.5498	29.8684	8.46986	15.1959
						2017	6	30	181	39.6	23.5	31.55	32.5	48.3451	62.2685	31.0374	8.98339	16.9027
						2017	7	1	182	39.6	26.6	33.1	12	52.8949	55.0107	30.5144	9.10943	18.7937
						2017	7	2	183	41.7	32.4	37.05	12.5	59.7165	44.4291	29.1378	9.37348	15.7642
						2017	7	3	184	42.4	31.6	37	12.5	55.2498	47.7358	29.0511	9.33708	16.8781
						2017	7	4	185	38.5	25.1	31.8	21.5	52.1409	55.895	30.5387	8.88384	17.1869
						2017	7	5	186	40.7	24.2	32.45	31	45.7146	60.3432	29.711	8.7563	16.8286
						2017	7	6	187	36	22.4	29.2	50.5	49.5592	53.9204	29.2424	8.06082	11.4707
						2017	7	7	188	35.9	21.8	28.85	42	51.3884	57.9661	30.8741	8.44722	13.6487
						2017	7	8	189	35	23	29	25.5	55.6674	53.4407	30.854	8.46887	15.317
						2017	7	9	190	36.8	24.2	30.5	22.5	53.5834	54.0121	30.4324	8.62087	16.2381
						2017	7	10	191	38.2	24.2	31.2	25.5	50.2085	56.2335	30.0581	8.63823	16.4836
						2017	7	11	192	39.5	25.2	32.35	25.5	49.7793	56.9476	30.1188	8.85883	16.8802
						2017	7	12	193	39.7	26.3	33	23	52.6485	56.4391	30.836	9.18734	17.2854
						2017	7	13	194	39.7	25.3	32.5	25.5	50.6027	58.2943	30.7238	9.06381	17.2906
						2017	7	14	195	38.6	23.1	30.85	27	47.9578	59.4677	30.2096	8.61978	17.0587
						2017	7	15	196	38.6	25.1	31.85	30.5	50.0237	54.0256	29.4078	8.56347	15.1206
						2017	7	16	197	38.4	22.5	30.45	45	46.0395	58.5623	29.3731	8.31217	13.4966
						2017	7	17	198	40.1	23.1	31.6	35.5	44.758	60.8709	29.5267	8.55481	15.9769
						2017	7	18	199	38.9	25	31.95	27.5	49.3218	54.8459	29.4216	8.58475	15.8718
						2017	7	19	200	34.8	21.6	28.2	44	51.7183	54.6146	30.0643	8.11106	12.4584
						2017	7	20	201	38	24.1	31.05	36.5	48.0725	53.4566	28.6763	8.21592	13.8497
						2017	7	21	202	37.1	22.4	29.75	50.5	46.1966	54.3272	28.3393	7.90328	11.627
						2017	7	22	203	37.5	22.4	29.95	47	45.4608	54.9166	28.2648	7.91565	12.2795
						2017	7	23	204	39	23.5	31.25	37	45.7305	56.7058	28.8066	8.28702	14.6025
						2017	7	24	205	38.4	24.5	31.45	32.5	49.7219	55.2908	29.6603	8.56741	15.0547
						2017	7	25	206	36.9	23.8	30.35	31	50.0153	52.416	28.964	8.17942	14.3774
						2017	7	26	207	39.2	24.1	31.65	30.5	45.1497	54.5408	28.0713	8.14136	15.2286
						2017	7	27	208	39.8	25.4	32.6	25.5	45.6085	52.541	27.6916	8.18551	15.6583
						2017	7	28	209	34.6	23.8	29.2	42.5	53.697	46.3942	28.2346	7.78301	10.9933
						2017	7	29	210	35.7	20.1	27.9	42.5	44.5275	55.5704	28.1392	7.54215	12.8703
						2017	7	30	211	38.9	23	30.95	37.5	43.4367	55.2515	27.7125	7.92352	14.1111
						2017	7	31	212	40.3	23.3	31.8	41.5	41.6328	56.6206	27.465	7.98969	13.8686
						2017	8	1	213	41.6	26.3	33.95	32.5	44.9232	54.986	28.1149	8.53325	15.3395
						2017	8	2	214	38.8	23.3	31.05	49.5	43.3615	53.7683	27.3143	7.82569	11.7591
						2017	8	3	215	35.6	22.6	29.1	53	48.4639	50.4025	27.9583	7.69044	10.7378
						2017	8	4	216	34.9	21.1	28	48.5	44.5551	49.1888	26.4824	7.11361	10.573
						2017	8	5	217	35.7	21	28.35	43.5	44.8985	52.8006	27.5429	7.45504	12.1615
						2017	8	6	218	37.9	21.9	29.9	39.5	41.9825	53.7376	26.8688	7.51683	13.2536
						2017	8	7	219	38.9	23	30.95	15.5	41.5184	52.8115	26.4886	7.5736	17.1135
						2017	8	8	220	42.7	27.8	35.25	34.5	41.3657	49.308	25.5478	7.9489	13.6521
						2017	8	9	221	43	25.8	34.4	54	38.2345	52.6107	25.3711	7.76745	11.8083
						2017	8	10	222	36.6	22.1	29.35	50	44.2174	51.2922	26.94	7.44984	10.9515
						2017	8	11	223	37.6	22	29.8	51	41.2539	51.4848	26.0704	7.27817	11.0474
						2017	8	12	224	36.8	21.3	29.05	53.5	41.3036	51.2165	26.018	7.14911	10.8979
						2017	8	13	225	35.7	23.4	29.55	51	43.886	43.1838	24.6263	6.8389	9.30933
						2017	8	14	226	36	22.8	29.4	43.5	41.8434	44.1867	24.324	6.73355	10.3813
						2017	8	15	227	38.3	24.7	31.5	49	40.7211	44.3046	24.0275	6.94742	9.88204
						2017	8	16	228	37.3	23.6	30.45	50.5	41.6483	45.6465	24.6648	6.97979	9.91438
						2017	8	17	229	35.7	23.4	29.55	51.5	43.4286	42.7337	24.3696	6.76763	9.21679
						2017	8	18	230	34.5	20.5	27.5	50.5	42.8852	48.0314	25.6738	6.82114	10.0538
						2017	8	19	231	34	20.8	27.4	48.5	44.1051	46.575	25.6387	6.79676	9.95797
						2017	8	20	232	35.5	20.7	28.1	48.5	41.4209	49.0423	25.4959	6.86359	10.5559
						2017	8	21	233	33	21	27	49.5	45.0544	43.2522	24.9717	6.56136	9.1006
						2017	8	22	234	34	20.1	27.05	44.5	41.4592	46.1026	24.7314	6.50546	10.3655
						2017	8	23	235	36.6	22.6	29.6	51	40.5016	45.3618	24.2469	6.74067	9.76273
						2017	8	24	236	37.2	21.5	29.35	50	37.9139	47.6198	24.0363	6.64688	10.1981
						2017	8	25	237	38.4	22.3	30.35	37.5	37.0903	47.7724	23.8119	6.72447	12.1919
						2017	8	26	238	39.1	24.1	31.6	38	35.5776	42.6932	22.0466	6.3876	11.0279
						2017	8	27	239	36.5	23.2	29.85	50	36.8789	39.2392	21.5191	6.01388	8.52708
						2017	8	28	240	33.9	22.6	28.25	53.5	44.5972	40.3159	23.9865	6.47835	8.58657
						2017	8	29	241	34.4	21.1	27.75	52.5	37.8103	40.2302	22.0626	5.89403	8.516
						2017	8	30	242	34.5	20.6	27.55	47	38.8137	43.1608	23.1533	6.15826	9.47186
						2017	8	31	243	35.6	20.9	28.25	45	38.7488	45.5686	23.7704	6.42	10.3395
						2017	9	1	244	35.4	20.9	28.15	39	39.3629	45.6609	23.9823	6.46315	11.1745
						2017	9	2	245	37.1	22.6	29.85	42.5	38.8798	45.1005	23.688	6.62001	10.7796
						2017	9	3	246	38.3	23.3	30.8	22	37.8675	45.441	23.4656	6.68862	13.8724
						2017	9	4	247	40.7	23.6	32.15	42.5	34.6163	47.355	22.9033	6.70968	11.5714
						2017	9	5	248	36.5	23.6	30.05	47.5	39.4288	40.6905	22.6584	6.35885	9.16216
						2017	9	6	249	32.4	20.5	26.45	68	42.1384	40.1157	23.2579	6.03605	8.349
						2017	9	7	250	33.3	19.4	26.35	37	39.9402	44.4136	23.8253	6.16931	10.8926
						2017	9	8	251	35.2	19.7	27.45	23	37.4405	46.4262	23.5845	6.25913	13.4768
						2017	9	9	252	37	21.8	29.4	40	37.9223	46.1135	23.6557	6.54856	11.3083
						2017	9	10	253	38.6	21.1	29.85	48	32.0909	44.9272	21.4793	6.00276	9.9778
						2017	9	11	254	39.4	21.4	30.4	57.5	29.2963	42.1867	19.887	5.62191	9.19083
						2017	9	12	255	38.4	25	31.7	45.5	36.0876	38.686	21.1364	6.13627	9.13201
						2017	9	13	256	38.2	22.2	30.2	54	34.1528	43.7156	21.8578	6.15341	9.48744
						2017	9	14	257	38.5	22	30.25	47.5	33.4826	44.197	21.7611	6.13256	9.93499
						2017	9	15	258	38.3	24.7	31.5	26	26.0494	28.3418	15.3705	4.44429	8.58176
						2017	9	16	259	40	23.6	31.8	55	29.3784	38.5445	19.0358	5.53758	8.55929
						2017	9	17	260	39.1	22.3	30.7	47	30.0347	40.3666	19.6969	5.60283	9.2205
						2017	9	18	261	36.1	21.6	28.85	46	33.4459	38.7972	20.3773	5.57527	8.81575
						2017	9	19	262	36.9	22.1	29.5	45	35.0764	41.5305	21.5907	5.98957	9.60456
						2017	9	20	263	35.1	22.2	28.65	55.5	37.4521	38.6506	21.5224	5.86334	8.28952
						2017	9	21	264	33.5	20.3	26.9	58	34.1056	36.0155	19.8259	5.19766	7.58381
						2017	9	22	265	30.6	22.2	26.4	49.5	47.9272	32.2071	22.225	5.76146	6.82832
						2017	9	23	266	28.8	17.9	23.35	46.5	40.9345	35.6949	21.6233	5.21868	7.48843
						2017	9	24	267	31.1	16.7	23.9	19	35.6975	41.1235	21.674	5.30082	11.8755
						2017	9	25	268	33.9	20.8	27.35	15.5	31.5249	33.0381	18.2562	4.83432	10.4988
						2017	9	26	269	31	19.9	25.45	24	37.1222	32.9645	19.7886	5.0196	9.37666
						2017	9	27	270	30.1	18.8	24.45	25.5	38.7859	35.0624	20.8609	5.16925	9.63639
						2017	9	28	271	31.6	16.8	24.2	57	33.9105	40.1501	20.873	5.14165	8.0838
						2017	9	29	272	31.5	19.8	25.65	58	37.2128	34.8312	20.366	5.18995	7.22211
						2017	9	30	273	28.5	17.7	23.1	53.5	37.1119	32.0647	19.5139	4.68097	6.41946
						2017	10	1	274	26.5	17.3	21.9	23.5	40.2261	29.6064	19.5219	4.54549	8.03931
						2017	10	2	275	27.5	17.5	22.5	28.5	35.1129	28.0903	17.7659	4.19913	7.33769
						2017	10	3	276	27.3	16.3	21.8	23	32.9241	28.9732	17.4715	4.05783	7.9048
						2017	10	4	277	28	16	22	26	22.7414	21.8317	12.6045	2.94224	5.92113
						2017	10	5	278	26.5	15.4	20.95	24.5	38.6444	34.3162	20.6	4.68175	8.9728
						2017	10	6	279	27.2	15.1	21.15	18.5	35.4649	34.33	19.7384	4.50906	9.57793
						2017	10	7	280	28.1	16	22.05	19	33.8211	32.7388	18.8235	4.39943	9.27137
						2017	10	8	281	29.1	18.2	23.65	23	32.3448	28.2047	17.0859	4.15365	7.96312
						2017	10	9	282	26.3	17.5	21.9	36.5	28.1247	19.7998	13.349	3.10819	4.80406
						2017	10	10	283	24	15.2	19.6	51.5	37.3678	26.3069	17.7361	3.89044	4.9867
						2017	10	11	284	25.1	15.7	20.4	24.5	32.2498	24.2518	15.8202	3.5444	6.42008
						2017	10	12	285	25.9	13.8	19.85	37.5	34.3913	33.2908	19.1409	4.22663	7.3628
						2017	10	13	286	27	16.2	21.6	52.5	35.2812	30.483	18.5513	4.28686	5.95925
						2017	10	14	287	27.9	16.6	22.25	40	29.8895	27.0201	16.076	3.77614	6.16029
						2017	10	15	288	27.4	17.5	22.45	45	36.1971	28.6681	18.2227	4.30176	6.1242
						2017	10	16	289	27.3	14	20.65	68.5	32.2435	34.3071	18.8143	4.2428	6.53565
						2017	10	17	290	25.8	13.1	19.45	70	32.823	33.3482	18.7155	4.08879	6.20246
						2017	10	18	291	27.2	15.2	21.2	74	32.9396	31.622	18.257	4.17601	6.12032
						2017	10	19	292	32.9	15.1	24	81	18.5222	26.3756	12.5032	3.06525	5.43035
						2017	10	20	293	28.1	15.7	21.9	55	30.9727	30.7249	17.4506	4.0632	6.03741
						2017	10	21	294	28.4	16.2	22.3	62	30.5423	29.8092	17.0687	4.01433	5.91205
						2017	10	22	295	28	14.3	21.15	75	28.9307	31.708	17.1332	3.91394	6.12992
						2017	10	23	296	26.4	14.2	20.3	66	30.1287	29.4056	16.8376	3.76247	5.61478
						2017	10	24	297	26.8	17.4	22.1	62.5	29.2394	21.988	14.3434	3.35655	4.44632
						2017	10	25	298	26.3	16.3	21.3	76	22.1405	17.7124	11.2023	2.56893	3.60208
						2017	10	26	299	25.2	14.7	19.95	62.5	31.4159	26.3893	16.2878	3.60619	5.0395
						2017	10	27	300	26.4	13.4	19.9	40	29.1753	30.3423	16.8309	3.72149	6.55178
						2017	10	28	301	21.2	15.1	18.15	34.5	12.1254	5.91719	4.7916	1.01029	1.65998
						2017	10	29	302	21.5	12.4	16.95	33	20.2133	14.7153	9.75613	1.98838	3.435
						2017	10	30	303	19	13.2	16.1	31	35.4535	16.4504	13.6613	2.7162	3.78302
						2017	10	31	304	20	13.2	16.6	33	20.6134	11.2137	8.60052	1.73521	2.69263
						2017	11	1	305	19.6	11.5	15.55	28	27.325	17.7066	12.4429	2.43381	4.10545
						2017	11	2	306	18	11.4	14.7	27	30.7816	16.2527	12.6527	2.41176	3.73913
						2017	11	3	307	17.5	12	14.75	27.5	18.5586	8.1658	6.96382	1.32943	2.08296
						2017	11	4	308	19.9	9.8	14.85	59	23.722	19.1673	12.0623	2.30984	3.27833
						2017	11	5	309	21	13.2	17.1	79	22.6452	14.1306	10.1191	2.07127	2.67867
						2017	11	6	310	20	12.4	16.2	68.5	24.9963	15.1978	11.0256	2.19862	2.78267
						2017	11	7	311	21.2	12.2	16.7	73.5	25.6393	18.4603	12.3068	2.4902	3.35611
						2017	11	8	312	22.3	12.9	17.6	71	26.252	19.7415	12.878	2.67373	3.65377
						2017	11	9	313	22.3	13.6	17.95	65.5	27.1387	18.8885	12.8076	2.68542	3.54279
						2017	11	10	314	20.2	9.7	14.95	60.5	27.487	23.0891	14.2509	2.73729	3.89624
						2017	11	11	315	21	9.6	15.3	62	26.9532	24.5813	14.5607	2.82669	4.17498
						2017	11	12	316	20.2	9.5	14.85	61	26.4345	22.6279	13.8351	2.64932	3.81202
						2017	11	13	317	20.3	12.3	16.3	55.5	26.0547	16.675	11.791	2.35816	3.02938
						2017	11	14	318	22	13.5	17.75	72.5	23.7024	16.1176	11.0566	2.30531	3.05916
						2017	11	15	319	22.8	13.1	17.95	52	26.0403	20.2073	12.9764	2.7208	3.7655
						2017	11	16	320	23.9	13	18.45	64	23.5648	20.5485	12.448	2.64651	3.87089
						2017	11	17	321	22.9	12.6	17.75	61	23.7351	19.5577	12.1879	2.54119	3.63715
						2017	11	18	322	20.7	13.6	17.15	51	23.365	13.2713	9.96129	2.04188	2.54024
						2017	11	19	323	18	13.2	15.6	55.5	20.3771	7.82479	7.14302	1.39925	1.56693
						2017	11	20	324	16.3	10.5	13.4	54	16.5337	7.67163	6.37094	1.16581	1.42781
						2017	11	21	325	14.7	8.9	11.8	64	24.1616	11.211	9.31021	1.61629	1.81548
						2017	11	22	326	13.3	5.9	9.6	87	28.2496	16.7237	12.2955	1.97591	2.276
						2017	11	23	327	11.2	2.5	6.85	85.5	14.1207	9.82803	6.66403	0.963434	1.15826
						2017	11	24	328	14.5	4.3	9.4	82.5	23.8201	19.4372	12.172	1.94178	2.57091
						2017	11	25	329	12.2	4.9	8.55	75	20.7211	12.1011	8.95767	1.38434	1.59718
						2017	11	26	330	13.6	8	10.8	75.5	29.2282	13.0942	11.0667	1.85631	1.97042
						2017	11	27	331	14.7	8.2	11.45	88	24.9708	12.9848	10.1861	1.74744	2.02299
						2017	11	28	332	11	8.4	9.7	86	12.7383	2.64956	3.28638	0.530051	0.576998
						2017	11	29	333	11	8.5	9.75	84	11.8121	2.36243	2.98826	0.482846	0.543736
						2017	11	30	334	15.1	8	11.55	87	14.1255	8.02327	6.02216	1.03664	1.36386
						2017	12	1	335	15.3	6.6	10.95	75.5	38.6129	26.8746	18.2227	3.07268	3.78883
						2017	12	2	336	16.5	7.3	11.9	79.5	38.768	28.5333	18.8143	3.27727	4.1996
						2017	12	3	337	19.7	7.7	13.7	77	33.7668	32.4161	18.7155	3.45764	5.10619
						2017	12	4	338	19.5	8.1	13.8	80.5	33.7953	30.8214	18.257	3.38364	4.88871
						2017	12	5	339	14.7	9.2	11.95	88	33.3212	14.6613	12.5032	2.18161	2.30261
						2017	12	6	340	11.6	6.1	8.85	84	46.5059	20.4626	17.4506	2.72756	2.59426
						2017	12	7	341	10.5	3.9	7.2	87	41.5249	21.9252	17.0687	2.5027	2.4145
						2017	12	8	342	12.3	3	7.65	77	35.1137	26.1246	17.1332	2.55737	2.95413
						2017	12	9	343	10.9	2.9	6.9	84.5	37.2062	23.812	16.8376	2.43919	2.52988
						2017	12	10	344	10.3	4.5	7.4	92.5	37.2236	17.2717	14.3434	2.11993	1.98285
						2017	12	11	345	14.2	4.1	9.15	79.5	22.0306	17.8008	11.2023	1.77066	2.33624
						2017	12	12	346	16.5	5.2	10.85	76	30.2834	27.3762	16.2878	2.73688	3.83402
						2017	12	13	347	16.8	7.1	11.95	60	33.7755	26.2098	16.8309	2.93672	3.89004
						2017	12	14	348	17.7	6.7	12.2	61.5	9.02952	7.94597	4.7916	0.843083	1.39544
						2017	12	15	349	16.2	7.2	11.7	74.5	20.3253	14.6342	9.75613	1.68798	2.27186
						2017	12	16	350	15.7	7.8	11.75	71	30.378	19.1989	13.6613	2.36766	2.89888
						2017	12	17	351	13.6	11.7	12.65	85	38.9967	5.9275	8.60052	1.53596	1.13709
						2017	12	18	352	15.8	8.6	12.2	89	28.9825	16.6939	12.4429	2.18933	2.6118
						2017	12	19	353	12.3	8	10.15	91.5	38.1354	13.1186	12.6527	2.07412	1.90274
						2017	12	20	354	13.6	8.5	11.05	86	19.2727	7.86326	6.96382	1.17831	1.30882
						2017	12	21	355	16.3	8.9	12.6	70.5	27.7138	16.4065	12.0623	2.15066	2.61766
						2017	12	22	356	14.1	8.8	11.45	73	27.4717	11.648	10.1191	1.73595	1.84359
						2017	12	23	357	13.1	10.1	11.6	81	39.7853	9.54847	11.0256	1.90116	1.57338
						2017	12	24	358	15.1	8.1	11.6	63	29.0722	16.2804	12.3068	2.12208	2.48346
						2017	12	25	359	15.4	6.7	11.05	73.5	27.2877	18.9923	12.878	2.17902	2.77226
						2017	12	26	360	17.8	4.9	11.35	93	22.2871	23.0003	12.8076	2.18965	3.35029
						2017	12	27	361	15	5.8	10.4	88.5	29.3648	21.6125	14.2509	2.35699	3.00854
						2017	12	28	362	12.6	7.4	10	61.5	39.9081	16.6018	14.5607	2.37408	2.31778
						2017	12	29	363	14.2	7.1	10.65	53	32.4514	18.4324	13.8351	2.30852	2.64151
						2017	12	30	364	14.9	8.5	11.7	75	29.13	14.9146	11.791	2.04005	2.30995
						2017	12	31	365	13.5	7.3	10.4	73.5	27.7528	13.7654	11.0566	1.82869	2.01251
																	1536.54	2475.92
																	ETo-HS	ETo-TURC (Ousman Couly (2016)

[truncated: 2 more sheets: Monthly Average, Calc. Rs. ]
