# Supplementary material for: Assessing of evapotranspiration models using limited climatic data in Southeast Anatolian Project Region of Turkey
Source: PeerJ. 2021 Jun 9;9:e11571. doi: 10.7717/peerj.11571 (PMC8197036; doi:10.7717/peerj.11571)
Supplement: Supplemental Information 6 [file peerj-09-11571-s006.xlsx]

## Sheet: 2008
	DİYARBAKIR					year	month	day	DOY	Tmax	Tmin	Tmean	RHmean.	Ra	Rs=0.16(Tmax-Tmin)^0.5*Ra	Rs=from meteorological station	ETo-HS	ETo-TURC (Ousman Couly (2016)
	DOY	246					#	#		°C	°C	°C	%	MJ m-2 day-1*(0.408 mm day-1)
	φ (-)	37.89	0.661305			2008	1	1	1	8.8	-1	3.9	63.5	13.7084	10.7474	6.86626	0.873873	0.821186
	tan(φ)		0.778198			2008	1	2	2	10.6	1.5	6.05	76	16.5213	12.0275	7.97414	1.11542	1.25783
	sin(φ)		0.614147			2008	1	3	3	11	1.2	6.1	71	13.4016	10.5069	6.7126	0.940928	1.12894
	cos(φ)		0.789191			2008	1	4	4	8	4.5	6.25	57.5	3.51653	0.984628	1.05261	0.148474	0.280334
	dr	0.984766		(1+0.033*cos(2*3.14/365*DOY))		2008	1	5	5	6.8	-0.5	3.15	83.5	18.2407	10.6526	7.88538	0.96889	0.685571
	δ	0.120494		(0.409*sin(2*3.14/365*DOY-1.39))		2008	1	6	6	9.3	0.5	4.9	93.5	20.2118	14.2291	9.59325	1.2772	1.24566
	tan(δ)	0.121081				2008	1	7	7	8.7	-1.2	3.75	85.5	20.5629	16.2858	10.3519	1.30839	1.1393
	sin(δ)	0.120203				2008	1	8	8	2.5	-0.5	1	65	18.9612	4.55069	5.25468	0.579392	0.128663
	cos(δ)	0.992749				2008	1	9	9	6.8	-3	1.9	79	16.6693	13.0687	8.3493	0.964682	0.528313
	X	0.991122				2008	1	10	10	6.2	-3.2	1.5	62	21.5056	16.1722	10.5496	1.19415	0.514661		-
	ωs (eq. 25)	1.49064		(acos{(-1*tan(-0.35)*tan(0.409*sin(2*3.14/365*DOY-1.39))))		2008	1	11	11	6.5	-2.6	1.95	64	21.1562	15.4017	10.2113	1.18281	0.623821
	sin ωs	0.996789				2008	1	12	12	7	-3	2	88	20.8636	16.6909	10.5563	1.22587	0.684951
	sin φ*sin δ	-0.0738224		(sin(0.35)*sin(0.409*sin(2*3.14/365*DOY-1.39)))		2008	1	13	13	6.9	-2.6	2.15	78.5	21.9202	16.6593	10.81	1.26484	0.728654
	cos φ*cos δ	0.783469		(cos(0.35)*cos(0.409*sin(2*3.14/365*DOY-1.39))		2008	1	14	14	8.2	-2	3.1	74	21.693	17.7015	11.0851	1.35879	1.05081
	Gsc	0.082				2008	1	15	15	11.1	-2.2	4.45	72.5	19.5743	20.827	11.4217	1.49049	1.6254
						2008	1	16	16	6	-1.5	2.25	68.5	11.0098	6.60589	4.82426	0.567301	0.351617
	Ra	24.8453				2008	1	17	17	10.8	-1.3	4.75	54.5	19.2024	18.5879	10.6873	1.41346	1.54168
						2008	1	18	18	11.7	-1.2	5.25	61	18.4102	18.9993	10.5797	1.43025	1.69496
						2008	1	19	19	13.5	1	7.25	69	19.4293	19.4293	10.9909	1.61476	2.17369
						2008	1	20	20	13	1	7	82	19.9244	19.1274	11.0432	1.60626	2.09281
						2008	1	21	21	13	1.5	7.25	91.5	20.1685	18.555	10.9431	1.60775	2.08538
						2008	1	22	22	11.4	1	6.2	85.5	18.9037	15.7279	9.75404	1.37298	1.61538
						2008	1	23	23	13	3.9	8.45	84.5	21.5744	15.7061	10.4131	1.60316	1.98793
						2008	1	24	24	13.3	-0.5	6.4	88.5	19.1009	21.0874	11.3531	1.61137	2.14878
						2008	1	25	25	13.2	1	7.1	85	13.703	13.3742	7.65802	1.11837	1.54012
						2008	1	26	26	12.5	2.7	7.6	85	16.7579	13.1382	8.39368	1.25041	1.5875
						2008	1	27	27	12	1	6.5	82	23.6492	20.8113	12.5497	1.78858	2.14633
						2008	1	28	28	4.4	0.2	2.3	86.5	5.91462	1.98731	1.93942	0.228631	0.168042
						2008	1	29	29	6.7	3.7	5.2	62	1.19811	0.287546	0.332029	0.0447891	0.189733
						2008	1	30	30	4.9	0.4	2.65	72	14.2889	5.14399	4.8498	0.581682	0.336698
						2008	1	31	31	7	0	3.5	80.5	29.6528	16.6056	12.5526	1.56813	1.09647
						2008	2	1	32	9	-3.1	2.95	86	23.3687	22.6209	13.0061	1.58282	1.25895
						2008	2	2	33	10	-1.5	4.25	71	22.9859	21.147	12.4718	1.6129	1.59038
						2008	2	3	34	11.8	-0.9	5.45	90.5	23.3989	23.7733	13.3419	1.81931	2.13672
						2008	2	4	35	13	1	7	89.5	24.3255	23.3525	13.4826	1.96107	2.50955
						2008	2	5	36	13	0	6.5	83	22.5249	23.4259	12.9944	1.85195	2.39137
						2008	2	6	37	12.8	0.1	6.45	86.5	22.5324	22.8929	12.8478	1.8273	2.32883
						2008	2	7	38	13	1.2	7.1	84.5	23.0811	21.7885	12.6858	1.85261	2.37813
						2008	2	8	39	8.8	3.2	6	89	9.48803	4.25064	3.59245	0.501459	0.561599
						2008	2	9	40	14.1	4	9.05	79	23.2477	18.7841	11.8212	1.86154	2.43502
						2008	2	10	41	16.3	4.3	10.3	73.5	22.8713	21.9564	12.6766	2.08918	3.03479
						2008	2	11	42	15.5	5.8	10.65	84	15.6787	12.1666	7.81294	1.30366	1.83502
						2008	2	12	43	11.2	5.6	8.4	60.5	25.266	11.3192	9.56646	1.47001	1.4922
						2008	2	13	44	10.2	4	7.1	69	26.7901	13.2879	10.6731	1.55868	1.53153
						2008	2	14	45	10.5	3.6	7.05	74.5	16.6051	9.16602	6.97889	1.01714	1.11565
						2008	2	15	46	8.3	-0.2	4.05	80	33.4008	22.7125	15.5807	1.99667	1.63462
						2008	2	16	47	8	-1.2	3.4	84	13.1312	9.66455	6.37261	0.792358	0.673331
						2008	2	17	48	8	3	5.5	81.5	4.00243	1.60097	1.43195	0.195683	0.306981
						2008	2	18	49	10.6	4.5	7.55	90.5	9.62488	4.69694	3.80347	0.565491	0.704427
						2008	2	19	50	9	-0.6	4.2	72	20.8555	16.017	10.339	1.33404	1.22788
						2008	2	20	51	8.8	-2.1	3.35	87.5	29.8853	26.06	15.7867	1.95825	1.59312
						2008	2	21	52	11.5	-2	4.75	73.5	27.6165	29.8258	16.2351	2.14718	2.37954
						2008	2	22	53	14	0.8	7.4	77	27.4078	28.9426	15.9324	2.35477	3.17807
						2008	2	23	54	15	3	9	78.5	28.787	27.6356	15.9554	2.5079	3.4556
						2008	2	24	55	12.5	5.2	8.85	74.5	17.616	10.2877	7.61532	1.19029	1.42383
						2008	2	25	56	11.6	6.1	8.85	67	24.5161	10.7871	9.19926	1.43786	1.48127
						2008	2	26	57	13.5	3.7	8.6	67.5	20.5747	16.1306	10.3055	1.59566	2.05831
						2008	2	27	58	16.5	4	10.25	70	29.2794	29.2794	16.5629	2.72482	3.94758
						2008	2	28	59	17	4.3	10.65	79.5	25.7949	26.2077	14.7081	2.45418	3.64229
						2008	3	1	60	17.5	7.2	12.35	66.5	30.0919	24.7957	15.4521	2.7324	3.76351
						2008	3	2	61	19	7	13	61	28.2484	27.1185	15.6569	2.82829	4.20394
						2008	3	3	62	18	6.8	12.4	70.5	25.3451	22.7092	13.5713	2.40379	3.47912
						2008	3	4	63	13.5	6.6	10.05	71.5	20.8212	11.4933	8.75083	1.42936	1.68937
						2008	3	5	64	18.5	4.4	11.45	61	30.3641	34.2507	18.2428	3.12957	4.8768
						2008	3	6	65	19.2	6	12.6	35	29.3273	30.9696	17.0482	3.03963	5.68122
						2008	3	7	66	22	8	15	42.5	27.9406	31.2935	16.7271	3.21782	5.72884
						2008	3	8	67	23.4	9.8	16.6	58	28.484	30.9906	16.807	3.39092	5.38712
						2008	3	9	68	24.5	10.8	17.65	57.5	24.5126	26.8658	14.5167	3.01824	4.85242
						2008	3	10	69	26	13	19.5	52	18.1549	18.8811	10.4734	2.2912	3.67451
						2008	3	11	70	22	15	18.5	70.5	11.2578	6.30435	4.76564	1.0146	1.43706
						2008	3	12	71	22.2	11	16.6	65	32.7219	29.3188	17.5213	3.53504	5.11486
						2008	3	13	72	19	7.3	13.15	67.5	29.4636	27.5779	16.125	2.92703	4.29632
						2008	3	14	73	17.5	10	13.75	63.5	24.6694	14.8016	10.8096	2.00021	2.50437
						2008	3	15	74	12	7	9.5	55.5	18.7553	7.5021	6.71009	1.07438	1.15301
						2008	3	16	75	16	5.5	10.75	43	36.2347	30.4372	18.7862	3.14567	4.63054
						2008	3	17	76	17.5	4.2	10.85	55	33.7252	35.8837	19.6789	3.30669	4.94098
						2008	3	18	77	18	5.3	11.65	50.5	32.6828	33.2057	18.6355	3.2188	4.78313
						2008	3	19	78	20.5	7.4	13.95	61.5	26.0806	27.3325	15.1033	2.81245	4.39508
						2008	3	20	79	23.5	9.8	16.65	62.5	31.0255	34.004	18.3738	3.71241	5.88622
						2008	3	21	80	21	8	14.5	61	29.1115	30.2759	16.7941	3.18146	4.93169
						2008	3	22	81	18	11	14.5	55.5	19.9429	11.168	8.44225	1.5993	2.02017
						2008	3	23	82	23.5	9.2	16.35	57.5	23.9049	27.3472	14.4636	2.89691	4.75926
						2008	3	24	83	28.2	12	20.1	56.5	22.4366	29.0779	14.4489	3.21176	5.53297
						2008	3	25	84	29.5	14	21.75	61.5	28.0066	34.7282	17.6419	4.09223	6.75501
						2008	3	26	85	27	14.5	20.75	55	33.377	33.377	18.8809	4.26888	6.38157
						2008	3	27	86	22	10	16	51	39.187	37.6195	21.7196	4.30564	6.35352
						2008	3	28	87	22.5	8	15.25	81	35.6134	41.3115	21.6979	4.20588	6.78283
						2008	3	29	88	22	8	15	58.5	29.8206	33.399	17.8525	3.43433	5.5008
						2008	3	30	89	24.5	11	17.75	56	23.7028	25.599	13.9343	2.90532	4.65218
						2008	3	31	90	21	13.4	17.2	61.5	12.9116	7.85023	5.69516	1.16907	1.646
						2008	4	1	91	20	9.2	14.6	65	32.6471	28.2071	17.1663	3.26204	4.63259
						2008	4	2	92	15.5	8.7	12.1	67	42.4582	23.0972	17.7148	3.10653	3.48625
						2008	4	3	93	19.5	6	12.75	52	38.6908	41.7861	22.7455	4.07543	6.24938
						2008	4	4	94	19.5	7.5	13.5	53	36.3035	34.8514	20.1215	3.69379	5.42455
						2008	4	5	95	21.5	11.2	16.35	58	40.1432	33.078	20.6134	4.12866	5.68577
						2008	4	6	96	20.5	9.8	15.15	57	36.6329	31.3578	19.1727	3.70516	5.2102
						2008	4	7	97	22.5	12.2	17.35	57	31.0687	25.6006	15.9537	3.28894	4.60384
						2008	4	8	98	21.5	13.8	17.65	59.5	34.0443	20.9713	15.1151	3.14264	3.86462
						2008	4	9	99	22.5	10	16.25	75.5	7.87016	7.87016	4.45204	0.889086	1.60558
						2008	4	10	100	22	9.8	15.9	74	42.8997	41.8701	23.9748	4.73862	7.01228
						2008	4	11	101	20.5	10.8	15.65	54.5	29.8188	23.1394	14.8592	2.91515	3.99349
						2008	4	12	102	25	12.6	18.8	59.5	32.5965	32.3357	18.3654	3.94231	5.93589
						2008	4	13	103	27	14.2	20.6	59	32.6368	33.4201	18.6824	4.20757	6.36987
						2008	4	14	104	32	15.7	23.85	43	30.0109	39.1343	19.3862	4.73561	8.62988
						2008	4	15	105	33	20	26.5	61.5	34.8285	36.2217	20.0922	5.22033	7.58386
						2008	4	16	106	33	20	26.5	55.5	33.316	34.6486	19.2196	4.99362	7.27247
						2008	4	17	107	30	18	24	79	35.9409	34.5033	19.9205	4.88365	6.98088
						2008	4	18	108	23.8	11.4	17.6	71	41.6925	41.359	23.4903	4.87708	7.27171
						2008	4	19	109	26	12.2	19.1	85	35.6798	39.3905	21.2072	4.58962	7.20253
						2008	4	20	110	27	12	19.5	78.5	30.752	36.9024	19.0563	4.16884	6.83214
						2008	4	21	111	29	13	21	70	36.86	47.1808	23.5904	5.36828	8.9098
						2008	4	22	112	31.5	16.8	24.15	70	37.3414	43.9135	22.9071	5.63598	8.79707
						2008	4	23	113	34	15.7	24.85	62.5	32.1144	47.0155	21.9809	5.49835	9.49271
						2008	4	24	114	36.4	19	27.7	32.5	32.8053	45.6649	21.8947	5.84275	12.0044
						2008	4	25	115	36	20	28	32.5	33.1493	42.4311	21.2155	5.69885	11.2338
						2008	4	26	116	36	19	27.5	42.5	28.3273	38.5251	18.6874	4.96496	9.01979
						2008	4	27	117	36	24	30	53	33.0771	31.754	18.3332	5.13966	6.99443
						2008	4	28	118	30	21.8	25.9	56.5	30.6506	20.1068	14.0432	3.59928	4.35741
						2008	4	29	119	29	15.2	22.1	48.5	43.4477	47.9662	25.8242	6.0432	9.44162
						2008	4	30	120	26.2	14.5	20.35	50	44.1679	41.3411	24.1724	5.40857	7.75065
						2008	5	1	121	25	12.2	18.6	50	42.3218	43.3375	24.2264	5.172	7.79568
						2008	5	2	122	26.7	10	18.35	49.5	35.72	47.7219	23.3555	4.95183	8.55709
						2008	5	3	123	28.5	14.7	21.6	46	41.5725	45.896	24.7096	5.70991	9.28074
						2008	5	4	124	28.2	16	22.1	49.5	38.4884	37.5647	21.5095	5.0335	7.37505
						2008	5	5	125	26.5	12.2	19.35	49.5	38.7936	44.3799	23.4719	5.11417	8.17295
						2008	5	6	126	28	15	21.5	53	42.8623	44.5768	24.7267	5.69938	8.52148
						2008	5	7	127	25.5	13.4	19.45	50.5	42.7366	41.369	23.7855	5.19645	7.60627
						2008	5	8	128	22.2	11.7	16.95	48	47.0822	39.5491	24.4102	4.97501	7.04362
						2008	5	9	129	21.5	12.5	17	56	31.5525	22.7178	15.1452	3.09117	4.08554
						2008	5	10	130	20	10	15	66	35.0938	28.0751	17.7562	3.4158	4.67558
						2008	5	11	131	22	11.2	16.6	66.5	50.5843	43.7048	26.5979	5.36629	7.4576
						2008	5	12	132	24.5	9.9	17.2	85	36.9822	43.1952	22.6094	4.64114	7.49877
						2008	5	13	133	25	12	18.5	64.5	38.6701	40.2169	22.3083	4.74943	7.24269
						2008	5	14	134	27	14.5	20.75	58	43.8769	43.8769	24.8205	5.61182	8.27083
						2008	5	15	135	29	14.3	21.65	54	43.702	51.3935	26.8089	6.2029	9.79412
						2008	5	16	136	23.5	14.5	19	57.5	15.3436	11.0474	7.36493	1.58959	2.27586
						2008	5	17	137	27.2	13	20.1	62	41.5418	47.1915	25.0466	5.56745	8.74851
						2008	5	18	138	27	14	20.5	57	44.4619	46.2404	25.6496	5.76165	8.65182
						2008	5	19	139	27	14.8	20.9	59.5	35.4803	34.6288	19.8284	4.50056	6.62677
						2008	5	20	140	29.8	14.7	22.25	53	43.5705	52.6331	27.0895	6.36313	10.133
						2008	5	21	141	33.5	18	25.75	50	39.7755	49.3217	25.0554	6.39968	10.071
						2008	5	22	142	35	19.9	27.45	53	40.703	49.1692	25.3066	6.71616	10.2754
						2008	5	23	143	37	21.8	29.4	30	41.9898	51.0596	26.193	7.25097	14.0272
						2008	5	24	144	37	23	30	49	42.6998	47.8238	25.5629	7.16648	10.4629
						2008	5	25	145	34.8	21.2	28	38.5	43.8788	47.7402	25.8907	6.95469	11.7112
						2008	5	26	146	32	17.9	24.95	41	42.2924	47.7058	25.4092	6.37082	10.8802
						2008	5	27	147	29.5	16	22.75	43.5	23.5354	25.4182	13.8359	3.29054	5.61633
						2008	5	28	148	30.2	16.3	23.25	49.5	40.4912	45.0263	24.154	5.81527	8.9416
						2008	5	29	149	32	20	26	48.5	48.8837	46.9283	27.0941	6.96012	9.84278
						2008	5	30	150	36	21.3	28.65	49	38.4055	45.1649	23.5598	6.41839	9.75234
						2008	5	31	151	31	17.8	24.4	39	49.3004	52.0612	28.6588	7.09313	12.0296
						2008	6	1	152	34	17.5	25.75	52.5	44.0479	58.1433	28.6278	7.31213	11.7991
						2008	6	2	153	35.5	20.2	27.85	52.5	44.2187	54.1237	27.674	7.40935	11.326
						2008	6	3	154	36.5	22.5	29.5	44	43.2712	48.4638	25.905	7.18641	11.2796
						2008	6	4	155	35	21.2	28.1	48	45.1912	49.8911	26.8604	7.23093	10.8061
						2008	6	5	156	34.2	19.5	26.85	41	47.8272	56.2448	29.3396	7.68322	13.0938
						2008	6	6	157	37.5	20.8	29.15	38.5	38.6983	51.7009	25.3029	6.96744	12.8185
						2008	6	7	158	36	21	28.5	40	43.333	51.9996	26.8525	7.29178	12.5552
						2008	6	8	159	35	18	26.5	58	38.5508	52.4291	25.4318	6.60769	10.7921
						2008	6	9	160	34.6	20	27.3	55	44.226	51.656	27.038	7.15185	10.753
						2008	6	10	161	35.5	21	28.25	49	41.3572	47.9744	25.1974	6.80539	10.2821
						2008	6	11	162	33	21	27	51.5	44.2846	42.5132	24.545	6.44926	8.88879
						2008	6	12	163	31.6	19	25.3	51	33.7957	34.0661	19.194	4.8519	7.03652
						2008	6	13	164	30.2	17.8	24	49.5	39.4349	39.1194	22.2183	5.44698	7.91764
						2008	6	14	165	32.5	18.7	25.6	57	48.0597	53.0579	28.5654	7.27106	10.7796
						2008	6	15	166	35.2	21	28.1	49	45.8793	52.1189	27.6618	7.44666	11.1128
						2008	6	16	167	37	23.1	30.05	36	44.113	49.0537	26.3145	7.3849	12.6907
						2008	6	17	168	36.1	21	28.55	42.5	42.1084	50.867	26.1805	7.11697	11.9153
						2008	6	18	169	36	21.2	28.6	36	45.0635	53.3552	27.738	7.54852	13.5296
						2008	6	19	170	37.4	23	30.2	35	46.6781	53.7732	28.341	7.97855	14.05
						2008	6	20	171	38.2	22.6	30.4	33	43.8292	54.6989	27.6978	7.82999	14.6509
						2008	6	21	172	39.5	25	32.25	24.5	45.941	53.2916	27.9901	8.2163	15.9867
						2008	6	22	173	38	26	32	25.5	49.911	47.9146	27.6635	8.07987	14.2481
						2008	6	23	174	36	24	30	30	50.455	48.4368	27.965	7.8399	13.4257
						2008	6	24	175	35.5	23	29.25	25.5	49.1883	49.1883	27.8251	7.6783	14.1854
						2008	6	25	176	37	22.5	29.75	26.5	45.5946	52.8898	27.7791	7.74705	15.1346
						2008	6	26	177	39.2	24.9	32.05	25.5	45.1622	51.6656	27.3252	7.98908	15.3245
						2008	6	27	178	41	26.2	33.6	30	45.2111	53.5299	27.8289	8.38933	15.3264
						2008	6	28	179	41.5	26.9	34.2	24.5	45.28	52.8871	27.6824	8.44256	16.1625
						2008	6	29	180	42.3	27.3	34.8	28.5	41.8844	50.2612	25.9548	8.00703	14.8239
						2008	6	30	181	40.5	27	33.75	39.5	46.2439	49.9435	27.1858	8.21937	12.8423
						2008	7	1	182	37.9	26	31.95	39	49.942	47.5448	27.5651	8.04305	12.1163
						2008	7	2	183	38	21.7	29.85	37.5	44.0289	57.4137	28.4415	7.94845	14.4692
						2008	7	3	184	38.2	25	31.6	36	48.6226	51.3455	28.2648	8.18918	13.4795
						2008	7	4	185	38	25.8	31.9	34	50.9103	49.6884	28.4515	8.29334	13.4131
						2008	7	5	186	36.4	22.5	29.45	41	47.9475	53.3177	28.6018	7.92617	12.8432
						2008	7	6	187	38.2	24.1	31.15	39	46.4006	52.3399	27.8775	8.00339	13.1787
						2008	7	7	188	39.5	23	31.25	44	40.3179	53.2196	26.2035	7.53818	12.5781
						2008	7	8	189	36.5	27	31.75	22.5	56.3932	42.8588	27.8105	8.08202	13.181
						2008	7	9	190	36	22	29	18	46.7052	52.3098	27.9608	7.67473	16.196
						2008	7	10	191	38.5	23	30.75	27.5	43.1914	53.5573	27.2071	7.74711	15.3216
						2008	7	11	192	39.5	24	31.75	34	42.0587	52.1528	26.4937	7.69934	14.0303
						2008	7	12	193	40.5	25.5	33	30.5	42.4046	50.8856	26.2772	7.82908	14.4356
						2008	7	13	194	42	26.5	34.25	32	41.967	52.0391	26.4359	8.07017	14.67
						2008	7	14	195	39	23	31	48.5	42.0375	53.808	26.904	7.70024	11.9281
						2008	7	15	196	39.5	22.6	31.05	37.5	37.1961	50.2892	24.4659	7.00961	12.9035
						2008	7	16	197	38.5	25	31.75	17.5	45.5054	49.1458	26.7516	7.7743	15.7951
						2008	7	17	198	40	26	33	32	44.5511	49.8972	26.6712	7.94647	13.9289
						2008	7	18	199	42.5	26.3	34.4	34.5	40.3683	52.3173	25.9967	7.95896	14.3456
						2008	7	19	200	40	24.5	32.25	26.5	40.0188	49.6233	25.2087	7.39984	14.6152
						2008	7	20	201	42.5	28	35.25	27	42.9502	49.8222	26.1679	8.14184	14.9982
						2008	7	21	202	44	28	36	26.5	39.7752	50.9122	25.4561	8.03235	15.4918
						2008	7	22	203	42	26.2	34.1	36.5	39.6706	50.1437	25.23	7.67986	13.4145
						2008	7	23	204	39.1	25	32.05	27.5	38.6482	43.5952	23.2198	6.78879	12.7482
						2008	7	24	205	43.7	27	35.35	25.5	36.6267	48.9333	23.9484	7.4653	14.9918
						2008	7	25	206	41	27.4	34.2	29	39.6184	43.1048	23.3769	7.12947	12.6606
						2008	7	26	207	42	28.7	35.35	24.5	42.1709	44.8698	24.607	7.67061	13.9439
						2008	7	27	208	39.2	26.5	32.85	29	43.2327	43.9244	24.651	7.32287	12.7307
						2008	7	28	209	37.5	20	28.75	20.5	36.9702	51.7582	24.7452	6.75582	15.5926
						2008	7	29	210	38.5	22	30.25	19	36.7295	48.4829	23.8713	6.72726	15.122
						2008	7	30	211	40.5	24	32.25	29	34.5546	45.612	22.4578	6.59234	13.1211
						2008	7	31	212	42.3	30	36.15	19.5	44.1031	43.3975	24.7481	7.83071	14.3082
						2008	8	1	213	40.7	27.2	33.95	28.5	42.7291	46.1474	25.1195	7.62411	13.5568
						2008	8	2	214	40	25	32.5	44.5	38.9553	46.7464	24.1397	7.12145	11.1723
						2008	8	3	215	38.5	23.8	31.15	38	38.9782	45.8383	23.9111	6.86469	11.7478
						2008	8	4	216	42.4	25	33.7	38.5	36.1302	50.2933	24.1138	7.2835	13.0832
						2008	8	5	217	41.8	27	34.4	39.5	38.8054	45.9456	23.886	7.31277	11.9249
						2008	8	6	218	40.5	24	32.25	45.5	36.9041	48.7134	23.9848	7.04058	11.4404
						2008	8	7	219	40	28.4	34.2	52	43.6871	40.5416	23.8069	7.26062	9.1866
						2008	8	8	220	37.4	24.8	31.1	49.5	36.3863	36.6774	20.6654	5.92679	8.16542
						2008	8	9	221	39.2	26.8	33	45.5	35.4501	35.1665	19.9732	5.95087	8.45075
						2008	8	10	222	39	27.7	33.35	40	40.3405	36.4678	21.697	6.509	9.42248
						2008	8	11	223	38.2	26	32.1	42	39.7201	38.7668	22.1978	6.49649	9.61848
						2008	8	12	224	40.4	26.6	33.5	46	32.3704	35.7369	19.2401	5.78886	8.56247
						2008	8	13	225	38.9	25.2	32.05	56.5	39.2402	43.0073	23.2387	6.7943	9.52314
						2008	8	14	226	37.5	21	29.25	49	34.6332	45.7158	22.5089	6.21129	9.93608
						2008	8	15	227	40.8	27	33.9	54	37.5389	41.4429	22.3121	6.76549	9.35557
						2008	8	16	228	39.8	27.5	33.65	54	41.6229	40.9569	23.3563	7.04788	9.23009
						2008	8	17	229	36	24	30	48.5	40.1608	38.5543	22.2593	6.24034	8.57982
						2008	8	18	230	38	24	31	53.5	36.1291	40.4645	21.6292	6.19054	8.8902
						2008	8	19	231	39.3	25	32.15	56.5	36.6767	41.9582	22.1911	6.50103	9.31085
						2008	8	20	232	41.5	28.5	35	58	35.3126	36.7251	20.3714	6.30846	8.42288
						2008	8	21	233	42.5	27.5	35	58.5	32.7783	39.334	20.312	6.29005	8.989
						2008	8	22	234	41	27.1	34.05	56	34.0352	37.8471	20.3028	6.17408	8.59441
						2008	8	23	235	42.3	30.6	36.45	49	32.4764	30.3979	17.7738	5.65521	7.23695
						2008	8	24	236	40.8	29	34.9	54	29.7049	28.0415	16.3264	5.04624	6.53291
						2008	8	25	237	35	29.4	32.2	56	33.8628	15.1705	12.8214	3.75988	3.65031
						2008	8	26	238	36.8	25	30.9	56.5	29.2661	27.6272	16.0852	4.59434	6.20177
						2008	8	27	239	40	28	34	56.5	29.093	27.9293	16.125	4.89888	6.45721
						2008	8	28	240	39.5	25.5	32.5	54.5	32.7363	36.6647	19.5981	5.78162	8.22007
						2008	8	29	241	41.5	28.5	35	55.5	31.4507	32.7087	18.1435	5.61854	7.55132
						2008	8	30	242	42	30	36	62	30.0191	28.8184	16.6383	5.25	6.76348
						2008	8	31	243	40	26.5	33.25	60	36.9986	39.9585	21.7506	6.51232	8.98268
						2008	9	1	244	38.5	22.8	30.65	40	31.3907	39.4267	19.9008	5.655	9.87566
						2008	9	2	245	38	22	30	46	32.3662	41.4287	20.7143	5.8072	9.5078
						2008	9	3	246	37	23.7	30.35	42.5	35.2579	37.5145	20.5732	5.80988	9.09684
						2008	9	4	247	38	23.2	30.6	57	35.1941	41.6698	21.6631	6.14942	9.1032
						2008	9	5	248	37.5	22	29.75	52	34.569	42.8656	21.7757	6.07284	9.26487
						2008	9	6	249	36.8	24	30.4	56.5	34.9818	35.8214	20.0247	5.66086	7.86953
						2008	9	7	250	40	24.5	32.25	53	34.6089	42.9151	21.8009	6.3995	9.5225
						2008	9	8	251	40	26	33	56	35.5479	39.8136	21.2813	6.34058	8.9307
						2008	9	9	252	38.5	23.5	31	56.5	34.3411	41.2094	21.2804	6.09071	9.0458
						2008	9	10	253	34.6	23	28.8	53.5	37.618	34.9095	20.4996	5.60271	7.54181
						2008	9	11	254	36.5	24.1	30.3	53.5	36.9476	36.652	20.8169	5.87259	8.03319
						2008	9	12	255	34	22	28	55.5	37.658	36.1517	20.8722	5.60663	7.71949
						2008	9	13	256	34	20.5	27.25	54.5	33.9645	36.6817	19.967	5.27564	7.75204
						2008	9	14	257	35	22	28.5	29.5	31.7962	33.068	18.3428	4.98099	9.23192
						2008	9	15	258	35	24.1	29.55	34	30.1754	26.3129	15.9399	4.42664	7.17521
						2008	9	16	259	36.5	22.6	29.55	30	31.3462	34.8569	18.6987	5.19278	9.76775
						2008	9	17	260	35.5	23	29.25	36.5	31.8996	31.8996	18.0451	4.97952	8.30823
						2008	9	18	261	35.9	22	28.95	12.5	31.7659	35.3237	18.9491	5.19563	11.7325
						2008	9	19	262	35.5	19.3	27.4	49.5	27.3571	35.4548	17.6176	4.6704	7.57508
						2008	9	20	263	35.5	18.5	27	40.5	28.0011	38.0814	18.4722	4.85361	9.09207
						2008	9	21	264	29.5	18	23.75	50.5	30.9287	28.4544	16.7815	4.0895	5.80344
						2008	9	22	265	30.8	20	25.4	45	32.5786	28.1479	17.1303	4.34026	6.31436
						2008	9	23	266	29.8	19	24.4	54	30.3012	26.1802	15.9328	3.94341	5.42731
						2008	9	24	267	23.4	15	19.2	60.5	14.3743	9.65952	6.6657	1.44649	2.04483
						2008	9	25	268	25.3	13.7	19.5	46.5	28.7436	26.6741	15.6636	3.42663	5.29197
						2008	9	26	269	28.3	15	21.65	57	30.4661	32.4159	17.7772	4.11318	6.31887
						2008	9	27	270	27.8	17	22.4	53.5	23.4268	20.2408	12.3182	2.90429	4.14612
						2008	9	28	271	21.5	17	19.25	43.5	22.406	8.06616	7.60485	1.65252	1.93386
						2008	9	29	272	25.1	14.5	19.8	30	30.6332	25.9769	15.9575	3.51901	6.36483
						2008	9	30	273	26.7	15	20.85	42.5	29.6694	27.7706	16.2376	3.68078	5.96047
						2008	10	1	274	24	15.8	19.9	43.5	26.6096	17.4559	12.1917	2.69571	3.77579
						2008	10	2	275	25.5	12.3	18.9	52	31.2893	33.0415	18.1887	3.91505	6.07184
						2008	10	3	276	26.5	13.3	19.9	55.5	30.8384	32.5654	17.9266	3.96377	6.12576
						2008	10	4	277	28.1	14.8	21.45	50	30.0521	31.9754	17.5356	4.03671	6.21448
						2008	10	5	278	30.7	17	23.85	55.5	27.1511	29.7576	16.0793	3.92782	6.06089
						2008	10	6	279	30.3	18	24.15	56	27.6078	27.1661	15.4919	3.81158	5.59453
						2008	10	7	280	30	17	23.5	55	27.5895	28.6931	15.916	3.85526	5.82479
						2008	10	8	281	27.9	17	22.45	54.5	30.536	26.6274	16.1304	3.80785	5.33668
						2008	10	9	282	26.8	15	20.9	47.5	29.6592	27.9983	16.3012	3.69998	5.62408
						2008	10	10	283	28	14.6	21.3	47.5	24.413	26.1707	14.2986	3.27898	5.32425
						2008	10	11	284	29	17	23	52	26.171	25.1242	14.5054	3.47104	5.10624
						2008	10	12	285	28.2	16.5	22.35	54.5	26.3208	24.6363	14.405	3.39208	4.95778
						2008	10	13	286	29.8	18	23.9	54.5	24.8728	23.4799	13.6706	3.34341	4.87012
						2008	10	14	287	31.7	18	24.85	56	24.9453	27.34	14.773	3.69535	5.68919
						2008	10	15	288	32.4	18.5	25.45	56	19.5009	21.685	11.6327	2.95078	4.63715
						2008	10	16	289	28.5	18.9	23.7	55.5	13.4746	10.3485	6.67994	1.62588	2.36139
						2008	10	17	290	24.5	14.4	19.45	27	28.1709	22.7621	14.3246	3.12951	5.77883
						2008	10	18	291	26	13	19.5	40	26.2257	27.2747	15.1293	3.30976	5.88024
						2008	10	19	292	27	14.5	20.75	52.5	25.8599	25.8599	14.6285	3.30745	5.02902
						2008	10	20	293	28.3	15	21.65	59.5	24.3403	25.8981	14.2027	3.28614	5.12529
						2008	10	21	294	30.5	16.9	23.7	57.5	24.1796	26.3074	14.2672	3.4726	5.39111
						2008	10	22	295	30	17	23.5	50	22.8435	23.7573	13.1782	3.19207	4.89084
						2008	10	23	296	23	14.5	18.75	43.5	14.3918	9.78643	6.71344	1.43913	2.23531
						2008	10	24	297	25.8	15	20.4	47.5	20.5204	17.7296	10.7899	2.4174	3.66711
						2008	10	25	298	25.8	16.8	21.3	50.5	24.0299	17.3015	11.5343	2.64507	3.52733
						2008	10	26	299	26	15.4	20.7	44.5	23.8389	20.2154	12.4182	2.80407	4.32437
						2008	10	27	300	24.5	15	19.75	42	21.859	16.6129	10.7799	2.37405	3.6718
						2008	10	28	301	23.4	14.5	18.95	39.5	18.8611	13.4291	9.00289	1.94047	3.08813
						2008	10	29	302	20	12.3	16.15	39	17.1259	10.5496	7.60359	1.514	2.35069
						2008	10	30	303	21	11.5	16.25	57	22.4168	17.0368	11.0549	2.20771	3.08324
						2008	10	31	304	23.8	11.5	17.65	54.5	22.2176	21.8621	12.4672	2.59211	4.0139
						2008	11	1	305	23.7	12.8	18.25	39.5	24.646	21.4913	13.0191	2.75266	4.61422
						2008	11	2	306	24.5	13.5	19	51	20.8869	18.3804	11.0838	2.39224	3.5462
						2008	11	3	307	23.4	11.6	17.5	54.5	22.9074	21.6246	12.5903	2.60663	3.95851
						2008	11	4	308	24.5	11.4	17.95	46	21.9565	23.0104	12.7151	2.66602	4.48111
						2008	11	5	309	23	10.5	16.75	64.5	21.2908	21.2908	12.0439	2.44053	3.82378
						2008	11	6	310	24.2	11.7	17.95	65	21.3745	21.3745	12.0912	2.53521	3.96261
						2008	11	7	311	24	11.6	17.8	69	20.3651	20.2022	11.4741	2.39571	3.75025
						2008	11	8	312	24.7	11.8	18.25	68	20.1275	20.7716	11.5666	2.44556	3.88991
						2008	11	9	313	22.8	11.5	17.15	79.5	20.9511	18.9398	11.2685	2.30983	3.47759
						2008	11	10	314	23	11.9	17.45	83.5	21.6581	19.2324	11.5452	2.38688	3.55451
						2008	11	11	315	22.5	12.8	17.65	77	21.9106	17.0026	10.9184	2.2701	3.19955
						2008	11	12	316	21	11	16	55	22.0081	17.6065	11.1353	2.20743	3.15144
						2008	11	13	317	21.1	10	15.55	62	18.5493	16.4718	9.88802	1.93407	2.92887
						2008	11	14	318	19.4	12.3	15.85	62	12.6739	7.1988	5.40332	1.06639	1.47943
						2008	11	15	319	19.8	11	15.4	67	20.5779	14.4868	9.76701	1.90181	2.60322
						2008	11	16	320	22	9.8	15.9	69.5	20.7538	20.2557	11.5984	2.29243	3.56447
						2008	11	17	321	21.4	9	15.2	75	20.1191	19.9581	11.3355	2.19392	3.44009
						2008	11	18	322	20	9.2	14.6	62.5	21.6718	18.7245	11.3953	2.16541	3.18264
						2008	11	19	323	19	7.9	13.45	60	19.0826	16.9454	10.1723	1.86439	2.78974
						2008	11	20	324	17.2	9.5	13.35	54.5	7.34452	4.52423	3.26084	0.595738	0.965537
						2008	11	21	325	16	11	13.5	59.5	6.6005	2.6402	2.36147	0.433505	0.694593
						2008	11	22	326	15	9.9	12.45	52	15.0003	6.12012	5.42007	0.961609	1.15435
						2008	11	23	327	16	6	11	53	5.69753	4.55803	2.88275	0.486931	0.871914
						2008	11	24	328	13.7	8.8	11.25	61.5	2.83724	1.1122	1.00488	0.17121	0.425435
						2008	11	25	329	18.2	8	13.1	66	9.62274	7.85216	4.91721	0.891139	1.43684
						2008	11	26	330	19	11	15	59.5	13.7634	8.80854	6.22858	1.1982	1.68927
						2008	11	27	331	20.4	9.3	14.85	61.5	18.4833	16.4132	9.85285	1.88674	2.85358
						2008	11	28	332	20.4	9	14.7	57.5	17.4573	15.921	9.4308	1.79763	2.76351
						2008	11	29	333	12	7	9.5	38	6.44017	2.57607	2.30411	0.368921	0.657031
						2008	11	30	334	12.2	6.7	9.45	46.5	9.04834	3.98127	3.39524	0.542631	0.763807
						2008	12	1	335	16.6	6.1	11.35	37.5	18.9702	15.9349	9.83526	1.68148	2.83666
						2008	12	2	336	18	8	13	46.5	19.4386	15.5509	9.83526	1.77666	2.66598
						2008	12	3	337	18.9	8.5	13.7	37.5	19.5967	16.3045	10.1116	1.86809	3.20807
						2008	12	4	338	19.3	7	13.15	50.5	17.9033	17.6168	10.0463	1.82362	2.85382
						2008	12	5	339	19.5	6.4	12.95	54.5	16.7364	17.5397	9.69207	1.74795	2.81944
						2008	12	6	340	19.5	6.2	12.85	78.5	14.9611	15.9186	8.72989	1.56931	2.57584
						2008	12	7	341	18.1	6	12.05	52	14.7646	14.2921	8.21741	1.43862	2.26231
						2008	12	8	342	16.2	6.5	11.35	48	12.3883	9.61334	6.17331	1.05542	1.60739
						2008	12	9	343	15	5.2	10.1	56.5	16.849	13.2096	8.43932	1.38096	1.90849
						2008	12	10	344	10.5	5.8	8.15	78	2.4407	0.917705	0.846611	0.128852	0.328249
						2008	12	11	345	11	5	8	49.5	25.3452	12.1657	9.93324	1.50307	1.54811
						2008	12	12	346	11.8	2	6.9	58	20.5589	16.1181	10.2975	1.49175	1.77841
						2008	12	13	347	14	2	8	59	17.7654	17.0548	9.84657	1.48995	2.0643
						2008	12	14	348	12.5	2	7.25	51.5	18.5244	15.5605	9.60414	1.41102	1.7829
						2008	12	15	349	10.7	0.5	5.6	68.5	15.945	13.0112	8.1479	1.11823	1.2726
						2008	12	16	350	14	1.5	7.75	55.5	17.3709	17.3709	9.82647	1.4725	2.05516
						2008	12	17	351	14	1.8	7.9	44.5	18.1324	17.6972	10.1334	1.52741	2.28237
						2008	12	18	352	16.5	2	9.25	48.5	16.0481	18.6158	9.77748	1.55118	2.50087
						2008	12	19	353	15	3	9	32	15.8322	15.1989	8.77511	1.37929	2.52666
						2008	12	20	354	13	4	8.5	40.5	18.7455	13.4968	8.99786	1.38792	1.9849
						2008	12	21	355	12.5	1.3	6.9	36.5	15.6701	14.0404	8.39075	1.21553	1.87932
						2008	12	22	356	9	5	7	34.5	15.1465	4.84687	4.84687	0.704987	0.835735
						2008	12	23	357	7.5	5.5	6.5	42.5	6.15446	0.984714	1.3926	0.198472	0.31904
						2008	12	24	358	9	5.5	7.25	44	2.79196	0.781749	0.835725	0.122783	0.314943
						2008	12	25	359	10	0.5	5.25	46	1.78296	1.35505	0.87927	0.118867	0.292701
						2008	12	26	360	10.5	1.6	6.05	48.5	20.6277	14.6869	9.84615	1.37728	1.52681
						2008	12	27	361	8.1	2.8	5.45	45	14.5304	6.16089	5.35224	0.729838	0.730347
						2008	12	28	362	9	1.8	5.4	47.5	23.051	13.2774	9.89639	1.34658	1.30607
						2008	12	29	363	10	-0.2	4.9	89	17.9894	14.6793	9.19256	1.22386	1.28003
						2008	12	30	364	5.3	1.6	3.45	76.5	8.59259	2.54341	2.64451	0.329588	0.268587
						2008	12	31	365	6.9	0	3.45	77.5	23.5976	13.0259	9.91775	1.23606	0.87623
										1.8	-1.7					6.98475
																	1378.43	2206.6
																	ETo-HS	ETo-TURC (Ousman Couly (2016)

## Sheet: 2009
	DİYARBAKIR					year	month	day	DOY	Tmax	Tmin	Tmean	RHmean.	Ra	Rs=0.16(Tmax-Tmin)^0.5*Ra	Rs=from meteorological station	ETo-HS	ETo-TURC (Ousman Couly (2016)
	DOY	246					#	#		°C	°C	°C	%	MJ m-2 day-1*(0.408 mm day-1)
	φ (-)	37.89	0.661305			2009	1	1	1	4	-4.7	-0.35	57.5	21.9938	15.3077	10.3796	1.06229	-0.12885
	tan(φ)		0.778198			2009	1	2	2	6.5	-4.2	1.15	64.5	19.4952	16.6879	10.2033	1.13401	0.41451
	sin(φ)		0.614147			2009	1	3	3	2.1	-4.1	-1	83.5	11.7477	5.82684	4.68023	0.461152	-0.175301
	cos(φ)		0.789191			2009	1	4	4	4.2	-0.3	1.95	64	11.1197	4.0031	3.77416	0.437175	0.217303
	dr	0.984766		(1+0.033*cos(2*3.14/365*DOY))		2009	1	5	5	6.6	0.5	3.55	94	5.57213	2.7192	2.20194	0.275722	0.285311
	δ	0.120494		(0.409*sin(2*3.14/365*DOY-1.39))		2009	1	6	6	9.8	3.6	6.7	73	4.9143	2.43749	1.95784	0.281327	0.433346
	tan(δ)	0.121081				2009	1	7	7	9.9	2.8	6.35	78.5	9.93684	5.64413	4.23641	0.600044	0.713097
	sin(δ)	0.120203				2009	1	8	8	13.5	2	7.75	65.5	18.159	16.7063	9.85285	1.47646	1.98497
	cos(δ)	0.992749				2009	1	9	9	11.9	3	7.45	69.5	17.1594	12.2175	8.19061	1.21296	1.47185
	X	0.991122				2009	1	10	10	9.4	-1.3	4.05	65.5	20.5537	17.5939	10.7572	1.37854	1.29728		-
	ωs (eq. 25)	1.49064		(acos{(-1*tan(-0.35)*tan(0.409*sin(2*3.14/365*DOY-1.39))))		2009	1	11	11	7	-1.1	2.95	67	20.5485	13.3154	9.35711	1.13875	0.78486
	sin ωs	0.996789				2009	1	12	12	9.6	-0.9	4.35	67	20.1315	16.9104	10.4374	1.35591	1.32414
	sin φ*sin δ	-0.0738224		(sin(0.35)*sin(0.409*sin(2*3.14/365*DOY-1.39)))		2009	1	13	13	14	0.3	7.15	81.5	18.1135	19.8524	10.7271	1.56971	2.19572
	cos φ*cos δ	0.783469		(cos(0.35)*cos(0.409*sin(2*3.14/365*DOY-1.39))		2009	1	14	14	14	2.5	8.25	70	19.0063	17.4858	10.3126	1.57559	2.15334
	Gsc	0.082				2009	1	15	15	14.9	2.2	8.55	72	16.7012	16.9684	9.52291	1.4717	2.14498
						2009	1	16	16	13	4.1	8.55	65	14.5541	10.3626	6.94707	1.07362	1.40151
	Ra	24.8453				2009	1	17	17	12.2	0.5	6.35	49.5	16.5572	15.4976	9.06151	1.28347	1.63318
						2009	1	18	18	13	2.8	7.9	62	19.5134	15.923	9.97134	1.50299	1.92636
						2009	1	19	19	13.5	3	8.25	95	17.8557	14.9988	9.25746	1.41438	1.87977
						2009	1	20	20	12.5	4	8.25	100	22.812	15.5122	10.6413	1.62581	1.93624
						2009	1	21	21	15	3	9	99	20.5136	19.6931	11.3698	1.78713	2.53228
						2009	1	22	22	15.7	3.6	9.65	68	19.7554	19.1232	10.9951	1.77014	2.57441
						2009	1	23	23	12.3	2.2	7.25	71.5	16.8406	13.6072	8.56325	1.2581	1.5856
						2009	1	24	24	7	2.8	4.9	79.5	5.12039	1.72045	1.67899	0.223533	0.290858
						2009	1	25	25	8	2.4	5.2	77.5	6.75663	3.02697	2.55826	0.345096	0.408344
						2009	1	26	26	10	5.2	7.6	78.5	4.86254	1.86722	1.70453	0.253925	0.412531
						2009	1	27	27	14	5.7	9.85	73	19.8398	13.1736	9.14525	1.48306	1.87555
						2009	1	28	28	12	4.8	8.4	98.5	8.39302	4.83438	3.60333	0.553699	0.770559
						2009	1	29	29	13.2	5.2	9.2	56	4.13197	2.64446	1.86991	0.29611	0.557962
						2009	1	30	30	9.5	5.6	7.55	97	5.79601	1.80836	1.83139	0.272288	0.404617
						2009	1	31	31	11.2	5	8.1	60.5	8.88063	4.40479	3.53801	0.537437	0.705992
						2009	2	1	32	13	5.7	9.35	89.5	21.1308	12.3404	9.13478	1.45457	1.71772
						2009	2	2	33	10.5	3.5	7	99	20.0943	11.2528	8.50631	1.23726	1.31608
						2009	2	3	34	14	2	8	99	21.788	20.9165	12.0761	1.82733	2.4807
						2009	2	4	35	13	3.6	8.3	99	18.7819	14.124	9.21349	1.41037	1.7905
						2009	2	5	36	14	4.2	9.1	98.5	22.8058	17.8798	11.423	1.80219	2.33754
						2009	2	6	37	14.5	6	10.25	96.5	24.6045	16.731	11.4774	1.88819	2.36847
						2009	2	7	38	16	5	10.5	76	19.787	17.4125	10.5002	1.74281	2.48944
						2009	2	8	39	15	6.6	10.8	73.5	12.6768	8.51883	5.87855	0.986062	1.37668
						2009	2	9	40	12.2	9.4	10.8	69	11.0723	2.48019	2.9644	0.497245	0.593062
						2009	2	10	41	13	7.8	10.4	76	18.9109	7.86693	6.89976	1.14117	1.26382
						2009	2	11	42	16.2	4.7	10.45	72	24.9945	22.995	13.5617	2.24699	3.19304
						2009	2	12	43	12.8	4.8	8.8	71	5.21816	3.33962	2.36147	0.36841	0.622353
						2009	2	13	44	16	7.2	11.6	95	12.8211	9.02609	6.08539	1.04931	1.50276
						2009	2	14	45	17.3	5.5	11.4	99.5	24.0836	22.7349	13.2368	2.2669	3.32315
						2009	2	15	46	17	6.2	11.6	100	11.5143	9.9484	6.0544	1.04397	1.62745
						2009	2	16	47	12.3	4.9	8.6	82	4.71371	2.79052	2.05163	0.317666	0.551333
						2009	2	17	48	10.4	1.7	6.05	82	24.5959	17.1188	11.6076	1.62368	1.71145
						2009	2	18	49	9	0.1	4.55	76	19.847	14.1311	9.47351	1.24181	1.17032
						2009	2	19	50	10.2	3.3	6.75	59.5	10.7403	5.92866	4.514	0.649952	0.77145
						2009	2	20	51	9.2	2.2	5.7	76.5	7.71487	4.32033	3.26586	0.450125	0.5472
						2009	2	21	52	6.5	3	4.75	81.5	8.26678	2.3147	2.47452	0.327269	0.328401
						2009	2	22	53	10	1	5.5	80.5	28.5798	20.5774	13.7183	1.87467	1.88527
						2009	2	23	54	9	3.4	6.2	79	9.79103	4.38638	3.70717	0.521821	0.587151
						2009	2	24	55	11.5	4.5	8	81	7.25198	4.06111	3.06991	0.464529	0.66325
						2009	2	25	56	13	6	9.5	83	10.7247	6.00581	4.53996	0.726914	0.973149
						2009	2	26	57	12.3	5.8	9.05	92	17.675	9.191	7.21001	1.1354	1.31596
						2009	2	27	58	13.4	6.4	9.9	85.5	23.471	13.1438	9.93575	1.61417	1.87761
						2009	2	28	59	10.3	5.8	8.05	87.5	19.2702	6.93726	6.54051	0.991609	0.977333
						2009	3	1	60	10	2.1	6.05	95	24.3468	15.3872	10.949	1.53155	1.55717
						2009	3	2	61	11.5	1.7	6.6	68.5	33.7331	26.4468	16.8962	2.41795	2.70307
						2009	3	3	62	7.8	4	5.9	84	43.045	13.0857	13.4256	1.86617	1.32805
						2009	3	4	63	8.5	4.8	6.65	86.5	9.23881	2.73469	2.84339	0.40774	0.459404
						2009	3	5	64	12	6	9	87	21.0836	10.1201	8.26304	1.2988	1.41943
						2009	3	6	65	13	7.9	10.45	42	12.6468	5.15991	4.56969	0.757135	1.0283
						2009	3	7	66	17.2	7	12.1	53	23.3874	19.0841	11.951	2.09576	2.93078
						2009	3	8	67	17.5	11.6	14.55	63.5	17.9454	8.47024	6.97429	1.32325	1.61191
						2009	3	9	68	16.7	10	13.35	60.5	38.462	20.6156	15.929	2.91015	3.31454
						2009	3	10	69	16.4	4.9	10.65	49	26.6228	24.4929	14.4451	2.41031	3.47046
						2009	3	11	70	16.3	6	11.15	62	7.55376	6.22429	3.87884	0.658594	1.09898
						2009	3	12	71	19.5	6.3	12.9	56	27.4366	28.973	15.9491	2.87173	4.45237
						2009	3	13	72	19.5	9	14.25	93.5	22.8191	19.1681	11.8308	2.22387	3.21051
						2009	3	14	73	14.9	7.4	11.15	89.5	26.0549	15.633	11.4167	1.93846	2.34261
						2009	3	15	74	7.8	3	5.4	64.5	15.9995	6.14379	5.60849	0.763136	0.675655
						2009	3	16	75	13	1.5	7.25	49.5	28.9378	26.6228	15.7012	2.3068	2.92103
						2009	3	17	76	13.6	2.7	8.15	35.5	32.8529	28.6477	17.3543	2.64126	4.04947
						2009	3	18	77	12.5	3.2	7.85	58.5	26.8948	20.0097	13.1229	1.97417	2.3536
						2009	3	19	78	15.5	5.7	10.6	79.5	33.6345	26.3694	16.8468	2.80611	3.65304
						2009	3	20	79	13	7.4	10.2	88	36.2105	16.2223	13.7103	2.25151	2.29776
						2009	3	21	80	17.4	5	11.2	68.5	38.529	38.2207	21.7079	3.69219	5.34194
						2009	3	22	81	19	6.6	12.8	58	38.4792	38.1713	21.6799	3.89086	5.74666
						2009	3	23	82	12.4	7	9.7	60	5.134	2.21789	1.90885	0.307874	0.524446
						2009	3	24	83	12.5	5.8	9.15	79.5	40.3232	21.6132	16.6998	2.63961	2.78403
						2009	3	25	84	14.9	2	8.45	67.5	35.6722	36.8137	20.4996	3.15603	4.34576
						2009	3	26	85	16	7	11.5	56.5	24.5236	17.657	11.7713	2.02284	2.65653
						2009	3	27	86	15.8	5	10.4	48	19.9853	17.2673	10.5085	1.73804	2.5272
						2009	3	28	87	14	7.5	10.75	73	22.3134	11.603	9.10212	1.52411	1.77211
						2009	3	29	88	16	7.7	11.85	56.5	43.7452	29.0468	20.1646	3.50657	4.26
						2009	3	30	89	20.3	7.3	13.8	51	36.7998	38.2717	21.2293	3.93452	5.9954
						2009	3	31	90	23	10	16.5	66	37.281	38.7722	21.5069	4.32654	6.63524
						2009	4	1	91	22.9	9.5	16.2	96.5	37.3229	40.0102	21.8599	4.35908	6.77651
						2009	4	2	92	23	11	17	71.5	37.5644	36.0618	20.8203	4.24946	6.28312
						2009	4	3	93	22.5	11.4	16.95	51.5	28.4845	25.2943	15.1842	3.09466	4.50362
						2009	4	4	94	21.5	12	16.75	56.5	26.1967	19.9095	12.919	2.61785	3.59787
						2009	4	5	95	21.2	8.5	14.85	61.5	40.3329	40.9782	22.9975	4.40385	6.64202
						2009	4	6	96	21.5	11	16.25	62.5	24.5474	20.6198	12.7268	2.54158	3.66082
						2009	4	7	97	21.5	11.8	16.65	75	43.1188	33.4602	21.4868	4.3414	5.79755
						2009	4	8	98	20	8.1	14.05	75.5	31.427	29.9185	17.3459	3.24022	4.79908
						2009	4	9	99	22	9	15.5	86.5	40.06	41.6624	23.1101	4.51352	6.8928
						2009	4	10	100	21	9	15	82	44.8693	43.0746	24.8691	4.78412	7.00051
						2009	4	11	101	22.7	8.9	15.8	55.5	40.2587	44.4456	23.9287	4.71549	7.40037
						2009	4	12	102	22	10.6	16.3	74.5	34.8835	31.8138	18.8448	3.7689	5.47335
						2009	4	13	103	23	8.4	15.7	72.5	36.4555	42.58	22.2874	4.37897	7.08173
						2009	4	14	104	21.7	9	15.35	50	26.4316	26.8545	15.0711	2.9302	4.53813
						2009	4	15	105	17	9.8	13.4	63.5	21.4263	12.3415	9.19884	1.68328	2.11087
						2009	4	16	106	17	7.8	12.4	50.5	28.0034	20.6105	13.5902	2.40713	3.1847
						2009	4	17	107	14.8	8.5	11.65	69.5	43.9169	22.1341	17.6369	3.04632	3.28276
						2009	4	18	108	11.9	6.5	9.2	84	35.9076	15.5121	13.3507	2.11415	2.07443
						2009	4	19	109	21	5.9	13.45	70.5	39.4073	47.604	24.5011	4.49059	7.28292
						2009	4	20	110	26	9.6	17.8	94.5	33.0352	43.3422	21.4052	4.46928	7.64314
						2009	4	21	111	25.5	12	18.75	68	29.4227	31.7765	17.2969	3.70787	5.83256
						2009	4	22	112	25.3	12.9	19.1	72	37.4834	37.1835	21.1188	4.5705	6.81931
						2009	4	23	113	27.2	15	21.1	77.5	43.2324	42.1948	24.1607	5.51222	8.02401
						2009	4	24	114	23	11.8	17.4	34.5	36.526	32.7273	19.5583	4.03777	7.07994
						2009	4	25	115	22.6	10	16.3	36.5	29.881	30.1201	16.9707	3.39409	6.20277
						2009	4	26	116	23	10	16.5	49.5	35.8374	37.2709	20.6741	4.15901	6.43711
						2009	4	27	117	23.5	12	17.75	76.5	36.5465	33.6228	19.8296	4.13449	6.00029
						2009	4	28	118	27.5	13	20.25	66	23.444	27.195	14.2835	3.18756	5.21523
						2009	4	29	119	26.1	10	18.05	66.5	36.2549	46.6963	23.2755	4.89392	8.25972
						2009	4	30	120	25.9	12.2	19.05	62	37.2224	40.7958	22.0437	4.7642	7.43794
						2009	5	1	121	25.2	11.1	18.15	62	37.0461	41.788	22.2573	4.69287	7.44734
						2009	5	2	122	27.4	12.7	20.05	57.5	38.7782	45.6031	23.7884	5.2808	8.45754
						2009	5	3	123	26	11	18.5	58.5	38.9492	46.7391	24.136	5.13853	8.35925
						2009	5	4	124	20	14.5	17.25	62.5	18.7216	8.23748	7.02495	1.44411	1.71244
						2009	5	5	125	22	14	18	61	20.8328	13.333	9.42787	1.97954	2.60789
						2009	5	6	126	20.5	10.7	15.6	62.5	38.8005	30.4196	19.4344	3.80702	5.13779
						2009	5	7	127	23	10	16.5	54.5	27.845	28.9588	16.0634	3.23147	5.04173
						2009	5	8	128	25.3	10	17.65	56.5	37.762	46.2207	23.6331	4.91366	8.09593
						2009	5	9	129	24.5	14	19.25	73.5	35.7938	30.0668	18.5576	4.03254	5.60279
						2009	5	10	130	26	13.7	19.85	81.5	40.1448	39.5024	22.5269	4.97433	7.34402
						2009	5	11	131	25	13.3	19.15	79.5	42.9147	40.1682	23.4866	5.08981	7.346
						2009	5	12	132	27.3	11.5	19.4	88	40.7253	51.4768	25.9008	5.65098	9.36484
						2009	5	13	133	29	14.9	21.95	76.5	42.6924	48.157	25.6496	5.97978	9.2532
						2009	5	14	134	30.7	16.1	23.4	63	40.8044	47.6595	24.9461	6.02794	9.398
						2009	5	15	135	32.5	18.6	25.55	37	36.8077	40.9301	21.9566	5.58242	9.96353
						2009	5	16	136	35	21	28	57	42.0473	47.093	25.1722	6.76169	9.92809
						2009	5	17	137	35	19.6	27.3	84.5	40.4906	49.8844	25.4235	6.7248	10.3986
						2009	5	18	138	36	21	28.5	58.5	41.9188	50.3026	25.9761	7.05381	10.6411
						2009	5	19	139	37	21.3	29.15	70	40.0226	50.2684	25.3732	6.98681	10.7166
						2009	5	20	140	33.9	23	28.45	67	26.0141	22.6843	13.7417	3.72753	5.02869
						2009	5	21	141	31.3	23.4	27.35	57	34.145	21.5797	15.3554	4.06618	4.73868
						2009	5	22	142	31.3	17	24.15	56.5	42.0814	48.1411	25.4611	6.26438	9.60549
						2009	5	23	143	32	19	25.5	39.5	42.8942	44.61	24.7452	6.28415	10.4824
						2009	5	24	144	32	17	24.5	53.5	35.0675	42.081	21.7305	5.39112	8.49313
						2009	5	25	145	31.5	19.1	25.3	39.5	47.7098	47.3281	26.8805	6.7949	11.0601
						2009	5	26	146	29.5	17.5	23.5	47.5	49.8748	47.8798	27.6434	6.69591	9.79301
						2009	5	27	147	28	15.7	21.85	59	46.4259	45.6831	26.0515	6.05821	8.7813
						2009	5	28	148	29.1	16	22.55	63.5	47.155	49.4185	27.3076	6.46242	9.58908
						2009	5	29	149	29.5	17.3	23.4	61	49.0882	47.9101	27.4332	6.62891	9.44532
						2009	5	30	150	33.3	18	25.65	57	43.9143	53.7511	27.4835	7.00373	10.923
						2009	5	31	151	34	21.3	27.65	51	46.7023	47.4495	26.6293	7.09842	9.95611
						2009	6	1	152	35.1	21	28.05	63.5	44.0437	49.6813	26.4614	7.11575	10.4571
						2009	6	2	153	37	22	29.5	58	42.9864	51.5837	26.6377	7.38968	11.0302
						2009	6	3	154	37	22.7	29.85	50	41.3132	47.2624	24.9964	6.98567	10.1824
						2009	6	4	155	37.2	23.2	30.2	62	38.7965	43.4521	23.2261	6.53862	9.43286
						2009	6	5	156	32.5	19.5	26	34.5	48.3652	50.2998	27.9013	7.16749	12.5796
						2009	6	6	157	34	17.8	25.9	44.5	35.3061	45.7567	22.7367	5.82742	10.1307
						2009	6	7	158	35.5	21	28.25	60	36.3927	42.2155	22.1727	5.98847	8.97123
						2009	6	8	159	34	23	28.5	70.5	42.3718	37.2872	22.485	6.1058	7.99765
						2009	6	9	160	34	21	27.5	72.5	38.4981	40.038	22.2091	5.90061	8.45039
						2009	6	10	161	37.5	22	29.75	56.5	42.528	52.7347	26.7893	7.47101	11.2988
						2009	6	11	162	37.4	24.4	30.9	66.5	30.2539	31.464	17.4531	4.98505	7.00248
						2009	6	12	163	39	24	31.5	66.5	36.8547	44.2256	22.838	6.60348	9.72627
						2009	6	13	164	34.9	23.8	29.35	55	30.8385	27.3846	16.439	4.54595	6.04679
						2009	6	14	165	37	22.3	29.65	54	40.204	47.2799	24.6631	6.8636	10.1631
						2009	6	15	166	37.4	23	30.2	44.5	35.934	41.396	21.8176	6.1421	9.71469
						2009	6	16	167	36	23	29.5	41	40.9237	42.5606	23.6084	6.54931	10.3557
						2009	6	17	168	32	22.7	27.35	38	32.2365	23.984	15.7293	4.16519	6.11489
						2009	6	18	169	37	22	29.5	38.5	37.7182	45.2618	23.3731	6.48403	11.3297
						2009	6	19	170	36	24	30	36	42.7043	40.9961	23.6691	6.63556	10.6854
						2009	6	20	171	37	22.8	29.9	39	39.9321	45.3628	24.0761	6.73554	11.3354
						2009	6	21	172	36	22.5	29.25	34	41.6722	45.006	24.4981	6.76022	11.8565
						2009	6	22	173	38	23	30.5	24	38.4391	46.1269	23.8198	6.74767	13.7411
						2009	6	23	174	39.2	24	31.6	29.5	30.1147	36.6195	18.7854	5.44271	10.5204
						2009	6	24	175	40	27	33.5	22.5	27.4864	28.5859	15.8566	4.77084	9.14889
						2009	6	25	176	39.5	27.4	33.45	32	44.6045	43.1772	24.8251	7.46197	12.1796
						2009	6	26	177	38.5	26	32.25	27.5	41.0236	41.0236	23.2064	6.8121	12.0545
						2009	6	27	178	38	25	31.5	27	39.8169	41.4095	22.9699	6.64162	12.1364
						2009	6	28	179	37	20	28.5	24	38.7564	52.7087	25.5675	6.94284	15.2637
						2009	6	29	180	38	23.5	30.75	27.5	42.7612	49.603	26.0528	7.41842	14.2328
						2009	6	30	181	39	21	30	39	38.9382	56.071	26.4321	7.41016	13.9088
						2009	7	1	182	40	24.8	32.4	34	42.1945	51.3086	26.3207	7.74943	13.9014
						2009	7	2	183	39.5	27	33.25	43	47.3276	47.3276	26.7725	8.01591	11.6126
						2009	7	3	184	39.6	25	32.3	43.5	44.9184	52.4647	27.4613	8.06913	12.6211
						2009	7	4	185	38	26	32	36	43.9704	42.2116	24.3709	7.11817	11.2205
						2009	7	5	186	37	21.8	29.4	46.5	31.4961	38.2992	19.6471	5.43886	8.70524
						2009	7	6	187	38.4	22	30.2	37	35.8423	47.0251	23.224	6.53803	12.0622
						2009	7	7	188	38.5	25.4	31.95	56	45.4907	47.6742	26.3438	7.68668	10.4982
						2009	7	8	189	40	25.5	32.75	18.5	36.9136	42.8198	22.4901	6.66775	13.8455
						2009	7	9	190	40.4	27	33.7	17	44.7634	47.9863	26.2177	7.919	15.8065
						2009	7	10	191	41.5	26.9	34.2	25	34.4255	40.209	21.0464	6.41872	12.3703
						2009	7	11	192	41	26.9	33.95	33	40.778	45.9976	24.4994	7.4359	12.85
						2009	7	12	193	40	25	32.5	31.5	41.9161	50.2994	25.9745	7.66272	14.0488
						2009	7	13	194	39	23	31	41	41.6449	53.3055	26.6528	7.62834	13.0608
						2009	7	14	195	35.7	21	28.35	64.5	39.9228	46.9492	24.4906	6.62886	9.94189
						2009	7	15	196	32.5	20.3	26.4	50	31.0113	30.267	17.3308	4.49272	6.39637
						2009	7	16	197	34	22.5	28.25	26	48.083	44.2364	26.0892	7.04626	12.5966
						2009	7	17	198	36	22.8	29.4	24.5	44.3464	46.8298	25.7789	7.13633	13.6998
						2009	7	18	199	37.5	22.6	30.05	24	34.3491	40.9441	21.2143	5.95358	12.2039
						2009	7	19	200	40	25.6	32.8	21	33.197	38.2429	20.1558	5.98162	12.134
						2009	7	20	201	41	29	35	27.5	43.0639	41.3413	23.8684	7.39138	12.4539
						2009	7	21	202	40	27	33.5	35.5	43.604	45.3482	25.1547	7.5684	12.2617
						2009	7	22	203	40.5	27.8	34.15	36.5	40.5341	41.1826	23.1122	7.04199	11.1181
						2009	7	23	204	41.5	28.5	35	25.5	34.6638	36.0503	19.9971	6.19255	11.1732
						2009	7	24	205	38.5	24.7	31.6	24	35.2924	38.9628	20.9769	6.07765	11.8353
						2009	7	25	206	37	24.7	30.85	30.5	41.3782	40.7161	23.219	6.62513	11.4158
						2009	7	26	207	37.8	25.9	31.85	25	44.6509	42.5076	24.6447	7.17646	12.7555
						2009	7	27	208	40	27.6	33.8	30	41.3782	41.0472	23.3132	7.05537	11.9084
						2009	7	28	209	38.5	28	33.25	27	48.9881	41.15	25.3983	7.60447	12.2723
						2009	7	29	210	35.8	22	28.9	19.5	43.6168	48.1529	25.9246	7.10064	14.721
						2009	7	30	211	39.1	23.1	31.1	29	40.1128	51.3443	25.6722	7.36274	14.5273
						2009	7	31	212	39	25.7	32.35	26.5	42.7478	45.4837	24.9436	7.33666	13.4585
						2009	8	1	213	37.5	23.8	30.65	30	42.2443	46.2997	25.0177	7.10902	12.9494
						2009	8	2	214	37.1	24	30.55	51	43.4214	45.5056	25.1454	7.13056	9.89581
						2009	8	3	215	37.5	24.2	30.85	43.5	34.8195	37.048	20.3174	5.79721	8.92153
						2009	8	4	216	38.8	25	31.9	40	40.7743	45.0149	24.2352	7.06433	11.3511
						2009	8	5	217	40.3	25	32.65	47.5	38.1601	46.7079	23.8822	7.06649	10.7355
						2009	8	6	218	40.5	27	33.75	63	40.3261	43.5522	23.7068	7.16753	9.79551
						2009	8	7	219	37.5	23.3	30.4	65.5	33.1883	37.7019	20.0101	5.65671	8.25989
						2009	8	8	220	37.1	22.6	29.85	63	36.7205	42.5958	22.3724	6.25235	9.21962
						2009	8	9	221	36.8	23	29.9	52	39.2443	43.3257	23.3258	6.52563	9.37546
						2009	8	10	222	34.8	23.1	28.95	45	44.4012	41.5596	24.3001	6.66281	9.5498
						2009	8	11	223	35	20.9	27.95	39	40.8595	46.0895	24.5484	6.58691	11.2468
						2009	8	12	224	34.9	21	27.95	46.5	40.3853	44.9084	24.0907	6.46412	9.95526
						2009	8	13	225	36.8	21.7	29.25	70	36.7162	44.3532	22.8279	6.29933	9.51693
						2009	8	14	226	37.9	21.7	29.8	54.5	36.0687	46.745	23.2278	6.4846	10.07
						2009	8	15	227	40	21.7	30.85	62.5	34.3032	50.2199	23.479	6.69932	10.9109
						2009	8	16	228	41.1	25	33.05	70.5	35.5818	45.8294	22.8434	6.81272	10.2177
						2009	8	17	229	41.2	26	33.6	62	37.6833	45.8229	23.5067	7.08634	10.2687
						2009	8	18	230	39.5	24.3	31.9	69	36.361	44.215	22.6818	6.61153	9.76354
						2009	8	19	231	41.2	26	33.6	75	35.8791	43.629	22.3812	6.74706	9.79853
						2009	8	20	232	39.9	28	33.95	91	41.3881	39.4015	22.8439	6.93342	8.92089
						2009	8	21	233	38.5	25.7	32.1	67	40.4164	41.3864	23.1357	6.77097	9.18542
						2009	8	22	234	37.5	24.8	31.15	67.5	42.2795	42.956	24.1075	6.92106	9.4255
						2009	8	23	235	37.3	26	31.65	55	44.5481	40.2715	23.9601	6.94901	8.90954
						2009	8	24	236	37.2	22.3	29.75	62.5	37.8859	45.16	23.3986	6.52543	9.73772
						2009	8	25	237	36.8	24.5	30.65	75	40.3776	39.7315	22.6575	6.43835	8.70465
						2009	8	26	238	36.5	26.4	31.45	73	46.8132	37.825	23.8039	6.8758	8.37786
						2009	8	27	239	35.5	22.5	29	77	39.5461	41.128	22.8137	6.26195	8.83022
						2009	8	28	240	36.2	23.5	29.85	78.5	38.7438	39.3637	22.0914	6.17384	8.55277
						2009	8	29	241	37.2	24	30.6	73.5	39.1294	41.3207	22.7463	6.4569	9.03057
						2009	8	30	242	34.8	22.5	28.65	75	37.9749	37.3673	21.3093	5.80528	8.02841
						2009	8	31	243	38.8	25	31.9	71	36.3561	40.1371	21.6091	6.29885	8.90371
						2009	9	1	244	36.2	24.6	30.4	48.5	42.7144	39.6389	23.2768	6.58019	8.84759
						2009	9	2	245	37.2	24	30.6	51.5	37.3583	39.4504	21.7167	6.16464	8.64149
						2009	9	3	246	36.2	23.9	30.05	54	41.1357	40.4775	23.0829	6.478	8.80216
						2009	9	4	247	36.8	23	29.9	66.5	36.8478	40.68	21.9014	6.12714	8.82928
						2009	9	5	248	39.4	24	31.7	68.5	34.5391	42.5521	21.6866	6.29599	9.39396
						2009	9	6	249	37.7	25.8	31.75	71.5	39.8793	37.9651	22.0111	6.39665	8.43299
						2009	9	7	250	37.2	22.9	30.05	72	33.1143	37.8827	20.0356	5.6228	8.26561
						2009	9	8	251	34	21	27.5	87	35.5383	36.9599	20.5016	5.44697	7.83294
						2009	9	9	252	33.8	22.2	28	88.5	35.0686	32.5437	19.1103	5.13335	6.99117
						2009	9	10	253	33.3	19	26.15	80	31.3905	35.9107	18.9927	4.89567	7.48609
						2009	9	11	254	33.5	21.4	27.45	80.5	37.2313	36.0399	20.7215	5.49929	7.64349
						2009	9	12	255	33	20.2	26.6	80	31.5704	32.3281	18.0719	4.70604	6.82239
						2009	9	13	256	33	23	28	58	37.1842	29.7473	18.8139	5.05372	6.4267
						2009	9	14	257	33.3	20	26.65	35	30.6756	32.6389	17.8994	4.66637	8.36479
						2009	9	15	258	34.4	20.6	27.5	30	32.5585	35.9446	19.3519	5.1415	9.80908
						2009	9	16	259	33.3	22.4	27.85	22.5	38.6311	33.6863	20.4066	5.46361	10.0401
						2009	9	17	260	31.4	20.8	26.1	19.5	38.8878	32.9769	20.2575	5.21578	9.91119
						2009	9	18	261	29.1	0	14.55	16.5	20.5282	47.7897	17.7181	3.36171	11.2573
						2009	9	19	262	26.9	16.2	21.55	30.5	32.2561	27.6112	16.882	3.89616	6.94098
						2009	9	20	263	27.9	15	21.45	34.5	27.8907	28.7832	16.0278	3.68963	6.87926
						2009	9	21	264	26.3	15.7	21	39.5	23.6774	20.0784	12.3341	2.80676	4.6101
						2009	9	22	265	27.2	14.2	20.7	44.5	34.9904	36.39	20.1855	4.55794	7.46015
						2009	9	23	266	27.3	16.3	21.8	56.5	36.6704	32.2699	19.4595	4.51955	6.3099
						2009	9	24	267	30	17.8	23.9	76.5	34.3572	33.5327	19.2007	4.69594	6.78479
						2009	9	25	268	31.5	17.7	24.6	63.5	32.0351	35.3667	19.0408	4.73499	7.21326
						2009	9	26	269	32	17.7	24.85	62	29.7704	34.0574	18.0125	4.50568	6.98774
						2009	9	27	270	28.5	19.1	23.8	58	38.6504	29.0651	18.96	4.62593	5.92429
						2009	9	28	271	23	13	18	37	38.3113	30.649	19.3841	4.07003	6.56396
						2009	9	29	272	24.7	11.4	18.05	27.5	32.674	34.7652	19.0655	4.00872	8.24535
						2009	9	30	273	26.5	11.7	19.1	44	29.8088	35.2936	18.3483	3.97091	7.04754
						2009	10	1	274	29.2	14.7	21.95	53	28.8167	33.4274	17.5569	4.09311	6.54068
						2009	10	2	275	30.7	16.7	23.7	53.5	29.2191	32.7254	17.4924	4.25762	6.60952
						2009	10	3	276	32.8	17.8	25.3	49	25.8162	30.9794	15.9977	4.04392	6.52775
						2009	10	4	277	33	19.2	26.1	54	27.8422	30.7378	16.5487	4.26085	6.46253
						2009	10	5	278	32.8	16.7	24.75	75	25.2917	32.5757	16.2372	4.05208	6.69113
						2009	10	6	279	28.7	17.1	22.9	80	24.5393	22.7724	13.3724	3.19208	4.65695
						2009	10	7	280	28.6	16.9	22.75	65.5	28.2059	26.4007	15.4366	3.67123	5.32267
						2009	10	8	281	28.7	17.1	22.9	66.5	27.1578	25.2024	14.7994	3.53269	5.11211
						2009	10	9	282	30	17	23.5	61	22.4952	23.395	12.9772	3.14339	4.82228
						2009	10	10	283	30.1	17.6	23.85	66	29.1528	29.1528	16.4913	4.02846	5.94579
						2009	10	11	284	30.8	16.7	23.75	71	27.1849	30.6645	16.3326	3.98012	6.22336
						2009	10	12	285	30.1	17.8	23.95	68.5	25.1194	24.7175	14.0955	3.45149	5.10994
						2009	10	13	286	29.2	18.9	24.05	72.5	20.7427	17.0919	10.6513	2.61437	3.66225
						2009	10	14	287	29.3	15.8	22.55	80.5	25.2326	27.2513	14.8337	3.51044	5.46232
						2009	10	15	288	29.6	15.8	22.7	76	25.7726	28.453	15.3186	3.63866	5.70108
						2009	10	16	289	31	18.6	24.8	66	25.0677	24.8671	14.1236	3.52876	5.2072
						2009	10	17	290	33.1	19.3	26.2	27.5	23.741	26.2101	14.111	3.64149	7.3722
						2009	10	18	291	26.4	20.3	23.35	37.5	36.6231	17.8721	14.4724	3.49283	4.44063
						2009	10	19	292	34.4	19.7	27.05	42.5	22.0486	25.9291	13.5257	3.55787	6.18616
						2009	10	20	293	32	19.7	25.85	84	22.0773	21.7241	12.3885	3.17154	4.67158
						2009	10	21	294	31.9	19.6	25.75	73	18.2913	17.9986	10.264	2.62164	3.93516
						2009	10	22	295	29.8	19.5	24.65	61.5	20.2314	16.6707	10.3888	2.58649	3.61563
						2009	10	23	296	30.7	18.4	24.55	45	21.1536	20.8151	11.8701	2.94834	4.72239
						2009	10	24	297	29.5	17.7	23.6	53	23.3751	22.0661	12.8474	3.11949	4.5784
						2009	10	25	298	27.9	16.6	22.25	54.5	23.3744	21.1305	12.5719	2.95305	4.29969
						2009	10	26	299	27.3	16.5	21.9	50.5	21.839	18.8689	11.4833	2.67377	3.8561
						2009	10	27	300	20.8	15.3	18.05	40	7.58994	3.33957	2.848	0.598821	1.05057
						2009	10	28	301	21.7	13.8	17.75	44	19.9057	12.5804	8.95181	1.86646	2.67612
						2009	10	29	302	19.1	12.9	16	46.5	13.3241	6.60875	5.30828	1.0523	1.46139
						2009	10	30	303	15.9	13.6	14.75	95	8.24452	1.51699	2.00055	0.381916	0.554385
						2009	10	31	304	20.5	12.9	16.7	58.5	12.6572	7.69556	5.58295	1.12967	1.5981
						2009	11	1	305	17.8	13.3	15.55	46	7.47566	2.69124	2.53732	0.496294	0.797544
						2009	11	2	306	16.6	11.5	14.05	57	11.0547	4.51031	3.9944	0.746155	0.989592
						2009	11	3	307	16.9	8.5	12.7	64.5	23.4882	15.7841	10.8921	1.9484	2.54044
						2009	11	4	308	15.6	8.3	11.95	55.5	4.21512	2.46163	1.82218	0.317941	0.62566
						2009	11	5	309	16.5	10.1	13.3	79	4.95896	2.53899	2.00725	0.366125	0.674393
						2009	11	6	310	21.4	10.9	16.15	67.5	23.0727	19.3811	11.9623	2.38189	3.45088
						2009	11	7	311	22	11.4	16.7	75	21.8689	18.5448	11.392	2.30508	3.36992
						2009	11	8	312	23	11	17	82.5	19.7612	18.9708	10.9528	2.23548	3.46844
						2009	11	9	313	23.6	13.3	18.45	91	20.3244	16.7473	10.4365	2.21887	3.22092
						2009	11	10	314	23.3	12.3	17.8	70	20.9121	18.4027	11.0972	2.31703	3.44752
						2009	11	11	315	23.5	12.8	18.15	75	19.7369	16.8947	10.3297	2.17799	3.22225
						2009	11	12	316	22.1	11.5	16.8	49	18.3323	15.5458	9.54971	1.93791	2.92954
						2009	11	13	317	20.2	12	16.1	68	3.99445	2.62036	1.83014	0.363874	0.755929
						2009	11	14	318	18	8.6	13.3	71.5	23.0547	17.3371	11.3095	2.06287	2.83032
						2009	11	15	319	16.9	8.4	12.65	70	22.1029	15.03	10.3105	1.84134	2.42807
						2009	11	16	320	14	8.2	11.1	70.5	11.3202	5.25256	4.36202	0.739355	0.968037
						2009	11	17	321	10.6	7.8	9.2	66	22.6888	5.08229	6.0745	0.961927	0.845263
						2009	11	18	322	16.7	9.2	12.95	63	24.8767	14.926	10.9004	1.96588	2.44404
						2009	11	19	323	15.4	5.4	10.4	84	21.4909	17.1927	10.8736	1.79842	2.44754
						2009	11	20	324	16.2	7.5	11.85	74	17.3856	12.1004	8.20485	1.4268	1.94147
						2009	11	21	325	18.6	4.7	11.65	71	19.7199	21.9285	11.7634	2.03182	3.25489
						2009	11	22	326	17.8	7.5	12.65	56.5	21.5996	17.7981	11.0914	1.9808	2.82066
						2009	11	23	327	18.8	6.6	12.7	30.5	18.9812	18.5257	10.6078	1.89754	3.74635
						2009	11	24	328	16.2	6	11.1	33	18.2852	14.9207	9.34371	1.58374	2.78733
						2009	11	25	329	13.6	6.9	10.25	41.5	12.0671	6.46799	4.9976	0.822172	1.20772
						2009	11	26	330	16.1	5.7	10.9	33	19.5334	16.2518	10.0789	1.69654	2.97407
						2009	11	27	331	16.6	5.3	10.95	38.5	19.0617	17.2318	10.2523	1.72873	2.94269
						2009	11	28	332	17.3	6.1	11.7	65.5	19.873	17.8062	10.6413	1.84112	2.70276
						2009	11	29	333	17.8	5.8	11.8	36.5	19.0632	18.3007	10.5659	1.83428	3.31993
						2009	11	30	334	18.4	6.9	12.65	43	18.4924	17.013	10.0337	1.79192	2.98024
						2009	12	1	335	17.7	7.1	12.4	34	19.9559	16.9226	10.3955	1.84128	3.27699
						2009	12	2	336	18.4	7.3	12.85	36.5	18.4786	16.409	9.85034	1.77072	3.15629
						2009	12	3	337	8.9	7.4	8.15	39	40.5625	4.8675	7.9486	1.20975	0.878636
						2009	12	4	338	13.8	8.8	11.3	59	10.1395	4.0558	3.62762	0.619131	0.818583
						2009	12	5	339	14	7.9	10.95	80.5	14.7488	7.19742	5.8283	0.982761	1.21488
						2009	12	6	340	11.2	8.5	9.85	68	14.4957	3.13106	3.81101	0.618021	0.64155
						2009	12	7	341	9.7	7.4	8.55	76.5	11.6334	2.14055	2.82288	0.436255	0.476139
						2009	12	8	342	15.2	4.8	10	61	17.1997	14.3101	8.87477	1.447	2.03362
						2009	12	9	343	14	12.7	13.35	68	48.7352	5.06847	8.89068	1.62428	1.04498
						2009	12	10	344	12	7.4	9.7	75.5	9.17289	3.37563	3.14779	0.507699	0.66539
						2009	12	11	345	11	8.5	9.75	66.5	3.97214	0.794427	1.00488	0.162369	0.35225
						2009	12	12	346	8.9	8.2	8.55	74.5	1.12599	0.0630557	0.150732	0.0232945	0.242322
						2009	12	13	347	8.3	7.6	7.95	71.5	4.31631	0.241714	0.577806	0.0872624	0.250393
						2009	12	14	348	14	5.8	9.9	74	20.7189	13.5916	9.49277	1.5422	1.9328
						2009	12	15	349	10.5	2	6.25	77	14.3757	9.77544	6.7059	0.945889	1.08185
						2009	12	16	350	10.3	6.8	8.55	68	4.15997	1.16479	1.24521	0.192439	0.366319
						2009	12	17	351	8.9	7.3	8.1	32.5	3.47562	0.444879	0.703416	0.106851	0.344431
						2009	12	18	352	12.1	8.3	10.2	42	12.8014	3.89163	3.99272	0.655685	0.836329
						2009	12	19	353	13	8	10.5	20.5	5.47233	2.18893	1.95784	0.324962	0.776375
						2009	12	20	354	13.5	10.6	12.05	37	9.0234	2.09343	2.45861	0.430429	0.685005
						2009	12	21	355	11.6	10.7	11.15	33	12.4488	0.896313	1.88959	0.320837	0.490593
						2009	12	22	356	17.8	9.9	13.85	36	14.3381	9.06165	6.44798	1.19692	1.99153
						2009	12	23	357	18.1	8.1	13.1	37.5	17.1199	13.6959	8.66207	1.56981	2.68876
						2009	12	24	358	16.4	9.7	13.05	39.5	15.5176	8.31745	6.42663	1.1628	1.72616
						2009	12	25	359	17.2	8.4	12.8	40	19.2758	13.5702	9.14901	1.64196	2.55456
						2009	12	26	360	12.3	8	10.15	39	8.11194	2.79051	2.6914	0.441193	0.706548
						2009	12	27	361	16.3	7.2	11.75	34	16.484	12.0003	7.95614	1.37888	2.3572
						2009	12	28	362	12.4	7.9	10.15	40	6.321	2.27556	2.14542	0.351692	0.624197
						2009	12	29	363	14.8	9.8	12.3	36	5.87492	2.34997	2.10187	0.371057	0.744158
						2009	12	30	364	11.9	9.6	10.75	28.5	25.8948	4.76465	6.28343	1.05213	1.15958
						2009	12	31	365	14.3	7	10.65	37	23.4699	13.7064	10.1459	1.69294	2.41081
																	1286.02	2009.1
																	ETo-HS	ETo-TURC (Ousman Couly (2016)

## Sheet: 2010
	DİYARBAKIR					year	month	day	DOY	Tmax	Tmin	Tmean	RHmean.	Ra	Rs=0.16(Tmax-Tmin)^0.5*Ra	Rs=from meteorological station	ETo-HS	ETo-TURC (Ousman Couly (2016)
	DOY	246					#	#		°C	°C	°C	%	MJ m-2 day-1*(0.408 mm day-1)
	φ (-)	37.89	0.661305			2010	1	1	1	15.3	4.5	9.9	57.5	14.9472	12.9143	7.85942	1.27684	1.84933
	tan(φ)		0.778198			2010	1	2	2	13.8	8.8	11.3	64.5	1.74726	0.698904	0.625119	0.10669	0.371465
	sin(φ)		0.614147			2010	1	3	3	13	6.9	9.95	83.5	9.84738	4.80552	3.8914	0.63334	0.852474
	cos(φ)		0.789191			2010	1	4	4	16.1	7.3	11.7	64	3.12281	2.19845	1.4822	0.256446	0.582555
	dr	0.984766		(1+0.033*cos(2*3.14/365*DOY))		2010	1	5	5	12	5.7	8.85	94	20.8184	10.4925	8.3606	1.30678	1.44738
	δ	0.120494		(0.409*sin(2*3.14/365*DOY-1.39))		2010	1	6	6	12.7	3.1	7.9	73	19	14.592	9.41908	1.41974	1.78402
	tan(δ)	0.121081				2010	1	7	7	14.8	4	9.4	78.5	16.2172	14.0117	8.52724	1.36033	1.92296
	sin(δ)	0.120203				2010	1	8	8	17.9	5.9	11.9	65.5	17.5924	16.8887	9.75069	1.69848	2.60269
	cos(δ)	0.992749				2010	1	9	9	18.5	8.7	13.6	69.5	18.9923	14.89	9.51286	1.7519	2.50306
	X	0.991122				2010	1	10	10	15	7	11	65.5	16.0246	10.2557	7.25188	1.22493	1.61919		-
	ωs (eq. 25)	1.49064		(acos{(-1*tan(-0.35)*tan(0.409*sin(2*3.14/365*DOY-1.39))))		2010	1	11	11	13.7	5.4	9.55	67	18.5554	12.3208	8.5532	1.372	1.7378
	sin ωs	0.996789				2010	1	12	12	12.2	7.4	9.8	67	10.9984	4.22337	3.85539	0.624087	0.773388
	sin φ*sin δ	-0.0738224		(sin(0.35)*sin(0.409*sin(2*3.14/365*DOY-1.39)))		2010	1	13	13	10.5	7.5	9	81.5	6.34558	1.52294	1.75854	0.276411	0.420004
	cos φ*cos δ	0.783469		(cos(0.35)*cos(0.409*sin(2*3.14/365*DOY-1.39))		2010	1	14	14	9.8	6	7.9	70	4.59111	1.3957	1.43195	0.215839	0.372772
	Gsc	0.082				2010	1	15	15	10.8	6.6	8.7	72	5.43961	1.82771	1.78366	0.277221	0.445825
						2010	1	16	16	15	6.7	10.85	65	15.0965	10.024	6.95879	1.1693	1.57623
	Ra	24.8453				2010	1	17	17	15.8	8.3	12.05	49.5	12.2998	7.37989	5.38951	0.943542	1.3171
						2010	1	18	18	15.4	10.4	12.9	62	8.90249	3.561	3.18505	0.573486	0.809976
						2010	1	19	19	11.3	9.2	10.25	95	6.28424	1.05575	1.45708	0.239708	0.395866
						2010	1	20	20	11.2	8.7	9.95	100	2.7805	0.556099	0.703416	0.114484	0.32713
						2010	1	21	21	11.6	6.6	9.1	99	19.4926	7.79702	6.97387	1.10026	1.15731
						2010	1	22	22	11.7	4	7.85	68	21.3366	13.1434	9.47309	1.42511	1.62234
						2010	1	23	23	11.4	6.8	9.1	71.5	3.14792	1.15843	1.08025	0.170429	0.380242
						2010	1	24	24	8.8	5.9	7.35	79.5	3.13483	0.727281	0.854148	0.125991	0.287211
						2010	1	25	25	10.2	2.8	6.5	77.5	26.2679	15.5506	11.433	1.62943	1.65329
						2010	1	26	26	4.6	-1.2	1.7	78.5	32.0568	14.8744	12.3525	1.41272	0.535343
						2010	1	27	27	6.5	-2.9	1.8	73	23.566	17.7216	11.5603	1.3289	0.658029
						2010	1	28	28	3.6	-2.1	0.75	98.5	12.6774	5.78088	4.84268	0.526863	0.116189
						2010	1	29	29	8.6	1.2	4.9	56	6.68866	3.95969	2.91122	0.387587	0.461783
						2010	1	30	30	8.8	2.9	5.85	97	5.74659	2.71239	2.23335	0.309781	0.417704
						2010	1	31	31	10.4	6.5	8.45	60.5	2.14667	0.669762	0.678294	0.104428	0.308281
						2010	2	1	32	15.7	7.6	11.65	89.5	16.6499	10.7891	7.58182	1.30956	1.74533
						2010	2	2	33	13.7	5.2	9.45	99	17.2497	11.7298	8.04658	1.28601	1.65583
						2010	2	3	34	10.8	6.4	8.6	99	3.29352	1.15932	1.10537	0.171151	0.367063
						2010	2	4	35	9.1	1.6	5.35	99	28.0348	16.8209	12.2842	1.66789	1.54121
						2010	2	5	36	8.7	1.2	4.95	98.5	24.3865	14.6319	10.6856	1.42577	1.2862
						2010	2	6	37	9.6	-1.9	3.85	96.5	24.8603	22.8714	13.4888	1.71278	1.58045
						2010	2	7	38	11	0.5	5.75	76	22.0471	18.5195	11.4305	1.57879	1.77043
						2010	2	8	39	9.6	2	5.8	73.5	16.8016	10.2153	7.41099	1.02578	1.0637
						2010	2	9	40	6.2	2.9	4.55	69	7.51963	1.98518	2.18561	0.286496	0.294018
						2010	2	10	41	8.3	3.3	5.8	76	19.9103	7.96414	7.12334	0.98597	0.869103
						2010	2	11	42	10.7	6	8.35	72	9.06271	3.40758	3.1436	0.482133	0.609443
						2010	2	12	43	14.3	6.3	10.3	71	12.8789	8.24247	5.8283	0.960542	1.30401
						2010	2	13	44	16.8	5.6	11.2	95	16.4028	14.6969	8.78307	1.49387	2.22458
						2010	2	14	45	18.2	7.1	12.65	99.5	22.3808	19.8741	11.9304	2.13065	3.11509
						2010	2	15	46	16	8.1	12.05	100	7.39061	4.67087	3.32364	0.581871	0.93365
						2010	2	16	47	14.6	10	12.3	82	20.7909	7.65106	7.13465	1.25953	1.36054
						2010	2	17	48	16.7	8.6	12.65	82	18.0778	11.7144	8.23206	1.47016	1.95783
						2010	2	18	49	17.4	8.7	13.05	76	22.2032	15.4534	10.4784	1.89591	2.53019
						2010	2	19	50	17.8	9.8	13.8	59.5	25.7503	16.4802	11.6533	2.15974	2.75845
						2010	2	20	51	20.1	9.1	14.6	76.5	23.276	20.4829	12.3516	2.34713	3.45152
						2010	2	21	52	16.3	8.7	12.5	81.5	13.4982	8.2069	5.95391	1.05807	1.45093
						2010	2	22	53	16.6	7.7	12.15	80.5	31.1118	22.1516	14.8505	2.60858	3.36302
						2010	2	23	54	14.5	6.8	10.65	79	22.4957	13.8573	9.98767	1.66654	2.05264
						2010	2	24	55	16.2	4.4	10.3	81	21.9826	20.7515	12.082	1.99119	2.88273
						2010	2	25	56	11.9	7.2	9.55	83	9.82317	3.69351	3.40738	0.54657	0.697437
						2010	2	26	57	13.3	8.6	10.95	92	8.67887	3.26325	3.01045	0.507619	0.700255
						2010	2	27	58	14.9	7.8	11.35	85.5	28.797	16.3567	12.2771	2.09895	2.46318
						2010	2	28	59	9.9	6.3	8.1	87.5	5.11964	1.47446	1.55421	0.236091	0.387461
						2010	3	1	60	18.8	6.7	12.75	95	26.7111	25.8564	14.8664	2.66369	3.98047
						2010	3	2	61	18.6	5.7	12.15	68.5	22.639	23.3635	13.0098	2.28527	3.53114
						2010	3	3	62	13.8	6.9	10.35	84	13.3295	7.3579	5.60221	0.924923	1.1958
						2010	3	4	63	15.8	5.3	10.55	86.5	30.7851	25.8595	15.9608	2.65385	3.57765
						2010	3	5	64	11.6	6.8	9.2	87	10.3199	3.96285	3.61757	0.57286	0.713336
						2010	3	6	65	16.3	7.9	12.1	42	6.33661	4.2582	2.93844	0.515295	0.979095
						2010	3	7	66	19	7.3	13.15	53	21.4337	20.0619	11.7303	2.1293	3.20789
						2010	3	8	67	17.9	9.1	13.5	63.5	20.6749	14.5551	9.81307	1.80143	2.44421
						2010	3	9	68	17.8	11.6	14.7	60.5	19.7539	9.79793	7.86989	1.5001	1.82402
						2010	3	10	69	23.2	11.6	17.4	49	25.2784	23.4584	13.7752	2.84387	4.31409
						2010	3	11	70	22.4	12.3	17.35	62	17.277	13.9598	8.78516	1.8111	2.66844
						2010	3	12	71	22.8	13.4	18.1	56	28.6351	21.5336	14.047	2.95764	4.00459
						2010	3	13	72	20.7	13.8	17.25	93.5	30.1538	16.6449	12.6732	2.60521	3.10651
						2010	3	14	73	23	12.7	17.85	89.5	15.8267	13.0412	8.12697	1.69925	2.54881
						2010	3	15	74	24.2	12.8	18.5	64.5	20.7202	18.8968	11.1935	2.3831	3.59282
						2010	3	16	75	19.8	10.2	15	49.5	24.2027	18.5876	11.9983	2.30813	3.22793
						2010	3	17	76	16.4	5.3	10.85	35.5	38.1103	33.8419	20.3153	3.41363	5.64378
						2010	3	18	77	16.5	6.5	11.5	58.5	27.6229	22.0983	13.9762	2.40173	3.25401
						2010	3	19	78	15.4	1.7	8.55	79.5	34.2558	37.5444	20.2869	3.13519	4.46076
						2010	3	20	79	16.9	4.5	10.7	88	36.949	36.6535	20.8178	3.47974	5.00047
						2010	3	21	80	20.5	5.6	13.05	68.5	34.6765	41.3344	21.4165	3.875	6.26287
						2010	3	22	81	23.4	7.2	15.3	58	30.8492	39.9805	19.8665	3.85671	6.58549
						2010	3	23	82	25.7	9.6	17.65	60	32.2766	41.5722	20.7215	4.30829	7.31693
						2010	3	24	83	25.7	13	19.35	79.5	36.0401	36.6167	20.5498	4.47749	6.75931
						2010	3	25	84	24.3	11.4	17.85	67.5	27.6284	28.5126	15.8771	3.3197	5.15492
						2010	3	26	85	24.7	13.1	18.9	56.5	26.6461	24.7275	14.5205	3.12548	4.63493
						2010	3	27	86	25.9	14.2	20.05	48	33.142	31.0209	18.1381	4.02648	6.0394
						2010	3	28	87	22.7	12.5	17.6	73	24.3846	19.8978	12.4605	2.58706	3.67993
						2010	3	29	88	21.1	8.7	14.9	56.5	16.7802	16.6459	9.45425	1.81319	2.89435
						2010	3	30	89	19.3	8.9	14.1	51	31.5008	26.2087	16.2539	3.04101	4.25064
						2010	3	31	90	20.3	7.9	14.1	66	39.388	39.0729	22.1919	4.15197	6.18293
						2010	4	1	91	21.5	9	15.25	96.5	30.9981	30.9981	17.5352	3.39898	5.17104
						2010	4	2	92	23.4	10.4	16.9	71.5	35.9978	37.4377	20.7667	4.22634	6.49171
						2010	4	3	93	26	11.9	18.95	51.5	34.3888	38.7905	20.6608	4.45319	7.07372
						2010	4	4	94	25.3	12.3	18.8	56.5	36.6793	38.1464	21.1598	4.54215	6.93781
						2010	4	5	95	24.8	11.7	18.25	61.5	40.1895	42.1186	23.2739	4.92087	7.52211
						2010	4	6	96	26.9	12.1	19.5	62.5	37.0505	43.8677	22.8058	4.98909	8.0526
						2010	4	7	97	22.5	11.6	17.05	75	38.2935	33.3919	20.2282	4.13456	5.85147
						2010	4	8	98	18.1	9.3	13.7	75.5	31.1407	21.9231	14.7805	2.73067	3.55343
						2010	4	9	99	19.3	6.9	13.1	86.5	35.0429	34.7625	19.7438	3.57814	5.32591
						2010	4	10	100	19.3	8.8	14.05	82	38.3296	32.1969	19.8723	3.71216	5.14067
						2010	4	11	101	15	9	12	55.5	10.7667	5.16801	4.21966	0.737499	0.999992
						2010	4	12	102	22.2	11.5	16.85	74.5	39.5761	33.8771	20.7131	4.20936	5.89872
						2010	4	13	103	20.8	11.2	16	72.5	47.3901	36.3956	23.4933	4.65723	6.1577
						2010	4	14	104	22.7	9	15.85	50	40.206	44.0658	23.8106	4.6992	7.35126
						2010	4	15	105	25.6	11.9	18.75	63.5	39.47	43.2591	23.3748	5.01075	7.81012
						2010	4	16	106	27.5	13.6	20.55	50.5	33.3698	37.1072	19.9058	4.47728	7.02407
						2010	4	17	107	26.6	16.9	21.75	69.5	30.0684	23.3331	14.9836	3.47561	4.66436
						2010	4	18	108	29	15.6	22.3	84	34.0481	36.4996	19.9418	4.69005	7.152
						2010	4	19	109	28.4	16.3	22.35	70.5	41.0582	39.7443	22.8514	5.38104	7.76035
						2010	4	20	110	29.1	15.7	22.4	94.5	35.8739	38.4568	21.0112	4.95387	7.52826
						2010	4	21	111	23.6	14.1	18.85	68	30.7382	23.361	15.1586	3.25838	4.39359
						2010	4	22	112	24.6	12.6	18.6	72	37.2403	35.7507	20.6407	4.40649	6.49373
						2010	4	23	113	24.4	11.8	18.1	77.5	42.113	42.4499	23.9178	5.03598	7.55026
						2010	4	24	114	26.1	13.7	19.9	34.5	43.8959	43.5448	24.7318	5.46845	9.85266
						2010	4	25	115	27.6	11.5	19.55	36.5	37.3023	48.0454	23.948	5.24599	10.4904
						2010	4	26	116	28.7	15.7	22.2	49.5	32.3238	33.6168	18.6472	4.37464	6.65293
						2010	4	27	117	24.5	15.3	19.9	76.5	21.6552	15.9382	10.5094	2.32373	3.18671
						2010	4	28	118	22.4	12.4	17.4	66	18.1138	14.491	9.16492	1.89208	2.76043
						2010	4	29	119	25.2	10.9	18.05	66.5	39.233	44.8826	23.7378	4.99111	7.95265
						2010	4	30	120	25.2	13.2	19.2	62	28.9427	27.785	16.0417	3.48112	5.19929
						2010	5	1	121	23.3	12.1	17.7	62	38.8742	34.8313	20.8157	4.33398	6.19532
						2010	5	2	122	36.6	12.8	24.7	57.5	23.5027	44.7491	18.3453	4.57281	9.03393
						2010	5	3	123	36.6	11.1	23.85	58.5	29.198	59.5639	23.5908	5.7627	11.7333
						2010	5	4	124	26.8	12.3	19.55	62.5	38.9354	45.1651	23.7219	5.19646	8.28913
						2010	5	5	125	28.5	13.2	20.85	61	36.6902	44.9089	22.9623	5.20516	8.47356
						2010	5	6	126	29.2	14.7	21.95	62.5	38.8213	45.0328	23.6524	5.51416	8.67786
						2010	5	7	127	30.5	16.2	23.35	54.5	39.6351	45.3426	23.981	5.7877	8.95282
						2010	5	8	128	31.4	16.7	24.05	56.5	39.587	46.5543	24.2846	5.96066	9.28726
						2010	5	9	129	28.4	17.5	22.95	73.5	28.8628	25.1683	15.2465	3.6439	5.11013
						2010	5	10	130	33.5	19.1	26.3	81.5	39.7972	45.8464	24.1632	6.24972	9.46309
						2010	5	11	131	33	21.2	27.1	79.5	42.3204	39.9504	23.26	6.12526	8.38911
						2010	5	12	132	34.1	22.4	28.25	88	46.0866	43.1371	25.2225	6.81217	9.15783
						2010	5	13	133	34.8	21.1	27.95	76.5	41.9537	45.9813	24.8457	6.66668	9.69763
						2010	5	14	134	35.5	22.3	28.9	63	42.2655	44.6324	24.5693	6.72943	9.53498
						2010	5	15	135	35.6	20.7	28.15	37	36.4053	43.3951	22.4842	6.05942	10.9071
						2010	5	16	136	36.6	24	30.3	57	37.2002	37.4978	21.1276	5.96023	8.20856
						2010	5	17	137	32	23	27.5	84.5	55.8999	40.248	26.832	7.12884	8.4925
						2010	5	18	138	29.2	15.9	22.55	58.5	40.4703	43.0604	23.6147	5.58848	8.40543
						2010	5	19	139	26.9	14.5	20.7	70	47.0409	46.6646	26.5037	5.9846	8.76354
						2010	5	20	140	29	13.2	21.1	67	39.3033	49.6793	24.9964	5.70289	9.38015
						2010	5	21	141	29.7	16.6	23.15	57	43.4243	45.5086	25.1471	6.03963	8.95391
						2010	5	22	142	30.4	16.6	23.5	56.5	37.7967	41.7275	22.4653	5.44166	8.29119
						2010	5	23	143	27.1	16.5	21.8	39.5	46.6948	39.5972	24.3244	5.64943	8.80382
						2010	5	24	144	27.3	14.8	21.05	53.5	37.7484	37.7484	21.3537	4.86555	7.21124
						2010	5	25	145	30	15.4	22.7	39.5	41.1441	48.0563	25.1538	5.97485	10.7642
						2010	5	26	146	32.7	18.1	25.4	47.5	42.7474	49.9289	26.134	6.62152	10.5006
						2010	5	27	147	34.5	20.3	27.4	59	36.6668	41.6535	22.1074	5.86062	8.76314
						2010	5	28	148	29.6	19.3	24.45	63.5	32.2551	26.5782	16.5629	4.10423	5.508
						2010	5	29	149	33.5	20.1	26.8	61	39.7743	42.638	23.2956	6.09365	8.88996
						2010	5	30	150	35.5	21.9	28.7	57	45.088	49.0557	26.6042	7.25556	10.4129
						2010	5	31	151	36.6	23.2	29.9	51	44.6511	47.866	26.152	7.3163	10.3127
						2010	6	1	152	37.3	25.4	31.35	63.5	45.6666	43.4746	25.2053	7.26581	9.55382
						2010	6	2	153	37.3	23.4	30.35	58	38.9695	43.3341	23.2462	6.56473	9.42387
						2010	6	3	154	37.3	20.8	29.05	50	39.2852	51.8564	25.5323	7.01565	11.0287
						2010	6	4	155	37.3	22.6	29.95	62	40.6388	47.7912	24.9298	6.98169	10.303
						2010	6	5	156	37.3	27.2	32.25	34.5	45.2865	36.5915	23.0277	6.75961	9.99681
						2010	6	6	157	37.3	23.3	30.3	44.5	40.8807	45.7864	24.4739	6.90423	10.7072
						2010	6	7	158	31.9	21.5	26.7	60	52.615	43.7757	27.1485	7.08556	9.10384
						2010	6	8	159	30.9	18.2	24.55	70.5	40.8557	41.5094	23.2956	5.78623	8.38971
						2010	6	9	160	32.1	19.3	25.7	72.5	46.4456	47.5603	26.587	6.78308	9.71902
						2010	6	10	161	33.4	19.2	26.3	56.5	39.3626	44.7159	23.7328	6.13839	9.23992
						2010	6	11	162	33.8	19	26.4	66.5	37.781	44.7327	23.2554	6.02858	9.25597
						2010	6	12	163	37.3	21.1	29.2	66.5	37.2046	48.2171	23.9593	6.60449	10.3027
						2010	6	13	164	37.3	27.3	32.3	55	45.169	36.1352	22.8539	6.71531	8.09194
						2010	6	14	165	37.3	27.6	32.45	54	50.7027	39.3453	25.266	7.44631	8.78437
						2010	6	15	166	37.3	22.4	29.85	44.5	42.4552	50.6066	26.2207	7.32782	11.7267
						2010	6	16	167	37.3	20.2	28.75	41	39.465	53.9881	26.1114	7.12882	12.8927
						2010	6	17	168	37.3	24.4	30.85	38	38.137	39.3574	21.916	6.25335	10.1272
						2010	6	18	169	37.8	26.3	32.05	38.5	42.9838	39.5451	23.3224	6.81878	10.2364
						2010	6	19	170	37.3	27.2	32.25	36	37.7341	30.4892	19.1873	5.63232	8.27201
						2010	6	20	171	37.3	24.2	30.75	39	43.1814	45.2541	25.0064	7.12048	11.4148
						2010	6	21	172	37.6	24	30.8	34	37.8671	41.1994	22.3435	6.36877	11.0874
						2010	6	22	173	37.3	25.5	31.4	24	48.9884	46.2451	26.9249	7.7694	13.9062
						2010	6	23	174	33.3	22.6	27.95	29.5	52.1481	44.6388	27.293	7.32335	12.1875
						2010	6	24	175	29.7	18.6	24.15	22.5	35.6534	31.6602	19.0056	4.67608	8.98939
						2010	6	25	176	32.8	17.7	25.25	32	42.9186	51.8456	26.6842	6.73744	13.1861
						2010	6	26	177	33.3	20.7	27	27.5	45.0811	45.4417	25.6035	6.72737	12.5171
						2010	6	27	178	33.9	18.7	26.3	27	41.9509	51.0123	26.1687	6.76846	13.9273
						2010	6	28	179	34.4	18.3	26.35	24	42.6815	54.9738	27.4014	7.09531	15.4597
						2010	6	29	180	34.8	19.2	27	27.5	42.4856	53.022	26.8487	7.05455	14.5133
						2010	6	30	181	35.3	19.4	27.35	39	40.3398	51.3122	25.7367	6.81519	12.3712
						2010	7	1	182	37.3	26	31.65	34	49.1022	44.3884	26.4095	7.6594	12.0098
						2010	7	2	183	36.6	21.1	28.85	43	36.4847	45.241	22.9824	6.28805	10.6188
						2010	7	3	184	37.3	28.6	32.95	43.5	56.144	39.0762	26.4962	7.88655	9.5837
						2010	7	4	185	36.4	27.5	31.95	36	54.9965	39.1575	26.2512	7.65968	10.4418
						2010	7	5	186	37.4	26.6	32	46.5	50.5325	43.6601	26.5707	7.76069	10.139
						2010	7	6	187	38.3	26.6	32.45	37	49.2448	46.0931	26.9509	7.94286	12.112
						2010	7	7	188	36.7	24	30.35	56	46.1633	46.9019	26.322	7.43332	10.1641
						2010	7	8	189	37.2	24.4	30.8	18.5	44.5344	45.6032	25.493	7.26649	14.4169
						2010	7	9	190	36.5	0	18.25	17	27.0124	78.8763	26.1114	5.52082	20.2711
						2010	7	10	191	37	22.5	29.75	25	42.7426	49.5815	26.0415	7.26246	14.4521
						2010	7	11	192	36.4	26.6	31.5	33	51.3788	40.281	25.7346	7.44101	11.0588
						2010	7	12	193	37.1	26.8	31.95	31.5	50.9569	41.9885	26.1662	7.63488	11.7562
						2010	7	13	194	37.5	27.3	32.4	41	49.8377	40.6676	25.467	7.49807	10.2252
						2010	7	14	195	36.4	30	33.2	64.5	62.5322	32.0165	25.3113	7.57098	7.28265
						2010	7	15	196	36.9	28.2	32.55	50	51.8854	36.1123	24.4864	7.23091	8.10684
						2010	7	16	197	36.9	27.5	32.2	26	50.4607	37.9465	24.7535	7.25898	11.37
						2010	7	17	198	37.2	26.4	31.8	24.5	46.3122	40.0137	24.3516	7.08398	12.0995
						2010	7	18	199	38.2	22.8	30.5	24	36.5529	45.0332	22.951	6.50156	13.4294
						2010	7	19	200	36.4	26.9	31.65	21	50.8108	38.6162	25.0575	7.26729	12.1083
						2010	7	20	201	36.8	28.2	32.5	27.5	54.8847	37.7607	25.7526	7.59725	11.1694
						2010	7	21	202	36.9	28	32.45	35.5	53.436	38.0464	25.5064	7.51714	10.2716
						2010	7	22	203	36.4	27.3	31.85	36.5	48.0041	34.9469	23.1696	6.74692	9.31076
						2010	7	23	204	36.8	27.7	32.25	25.5	51.2311	37.2962	24.7272	7.25849	11.2504
						2010	7	24	205	37.4	27.4	32.4	24	44.7991	35.8393	22.6667	6.67361	11.0224
						2010	7	25	206	36.4	26.1	31.25	30.5	44.141	36.3722	22.6663	6.52061	10.3005
						2010	7	26	207	36.4	23.5	29.95	25	40.7541	42.0583	23.42	6.55885	12.3757
						2010	7	27	208	36.4	28.7	32.55	30	53.3713	32.8767	23.6959	6.99747	9.54029
						2010	7	28	209	37.2	27.3	32.25	27	47.0075	37.23	23.6649	6.94668	11.0532
						2010	7	29	210	37.7	29	33.35	19.5	49.0766	34.1573	23.1608	6.94812	11.1277
						2010	7	30	211	36.4	31.1	33.75	29	64.2496	27.2418	23.6662	7.15525	8.18358
						2010	7	31	212	37.3	31.2	34.25	26.5	58.8618	28.7245	23.2605	7.1008	8.87331
						2010	8	1	213	41	0	20.5	30	22.609	74.1575	23.1629	5.20307	17.5492
						2010	8	2	214	36.9	28.2	32.55	51	50.347	35.0415	23.7604	7.01651	7.87962
						2010	8	3	215	36.9	28	32.45	43.5	44.03	31.3493	21.0166	6.19395	7.74749
						2010	8	4	216	36.9	29.2	33.05	40	53.6297	33.0359	23.8106	7.10117	8.55971
						2010	8	5	217	36.9	29.4	33.15	47.5	47.8462	28.7077	20.9651	6.26484	6.80781
						2010	8	6	218	36.9	28	32.45	63	47.0413	33.4934	22.454	6.61757	7.54376
						2010	8	7	219	36.9	30.9	33.9	65.5	61.6333	29.584	24.1552	7.32436	6.80699
						2010	8	8	220	36.9	25.6	31.25	63	44.8728	40.565	24.1347	6.94303	8.93449
						2010	8	9	221	36.9	0	18.45	52	24.0512	70.9993	23.376	4.96989	12.4973
						2010	8	10	222	36.9	24.9	30.9	45	41.2229	39.574	22.848	6.52598	9.31604
						2010	8	11	223	37.2	26.2	31.7	39	42.1383	37.0817	22.3611	6.49182	9.53813
						2010	8	12	224	36.9	28.4	32.65	46.5	48.2162	32.787	22.4917	6.65506	7.77877
						2010	8	13	225	36.9	25.8	31.35	70	41.5223	36.8718	22.1342	6.3805	8.16937
						2010	8	14	226	37.4	29.3	33.35	54.5	48.0978	31.1674	21.9022	6.57054	7.1113
						2010	8	15	227	37.9	29.5	33.7	62.5	49.5001	33.2641	22.9544	6.93332	7.58407
						2010	8	16	228	37.2	29.1	33.15	70.5	49.7317	32.2261	22.6462	6.76719	7.32398
						2010	8	17	229	36.9	29.8	33.35	62	52.275	29.6922	22.2866	6.68585	6.79587
						2010	8	18	230	36.9	27.3	32.1	69	46.2423	35.5141	22.9242	6.70909	7.94476
						2010	8	19	231	38	26.5	32.25	75	39.7906	36.6074	21.5898	6.33755	8.18787
						2010	8	20	232	37	28.7	32.85	91	48.454	32.1734	22.3351	6.63492	7.29199
						2010	8	21	233	36.9	29.7	33.3	67	51.7566	29.8118	22.2204	6.65949	6.81827
						2010	8	22	234	36.9	26.2	31.55	67.5	44.5721	38.1537	23.3279	6.75197	8.45551
						2010	8	23	235	37.3	27	32.15	55	43.9763	36.2365	22.5817	6.61548	8.1014
						2010	8	24	236	36.9	27.8	32.35	62.5	45.4111	33.0593	21.9181	6.44677	7.44445
						2010	8	25	237	36.9	29.5	33.2	75	51.3102	30.3756	22.3326	6.68002	6.93229
						2010	8	26	238	36.9	27.8	32.35	73	39.9668	29.0958	19.2903	5.67386	6.60501
						2010	8	27	239	36.9	27.9	32.4	77	46.0108	33.1278	22.0852	6.50238	7.4626
						2010	8	28	240	36.9	26.7	31.8	78.5	42.5952	34.7577	21.7661	6.33185	7.76164
						2010	8	29	241	39	0	19.5	73.5	21.5032	67.09	21.486	4.70038	12.1215
						2010	8	30	242	36.9	24.6	30.75	75	37.2527	36.6566	20.904	5.95233	8.07327
						2010	8	31	243	36.9	23.3	30.1	71	36.1307	39.3102	21.3189	5.98921	8.56553
						2010	9	1	244	36.5	26.1	31.3	48.5	37.831	31.4754	19.5202	5.62126	7.18497
						2010	9	2	245	37.1	23.8	30.45	51.5	37.4537	39.8507	21.8545	6.18451	8.71066
						2010	9	3	246	36.6	24.5	30.55	54	37.9332	36.7193	21.1121	5.98682	8.06901
						2010	9	4	247	36.4	22.2	29.3	66.5	34.8709	39.6134	21.0246	5.80787	8.55061
						2010	9	5	248	37.5	23.1	30.3	68.5	35.0996	40.4348	21.311	6.01197	8.81755
						2010	9	6	249	36	23.3	29.65	71.5	35.4585	36.0258	20.2182	5.6266	7.8464
						2010	9	7	250	36.4	21.5	28.95	72	32.8427	39.1485	20.2839	5.56162	8.42082
						2010	9	8	251	35.7	23.8	29.75	87	36.6742	34.9139	20.2421	5.64512	7.62611
						2010	9	9	252	35.7	23	29.35	88.5	35.7581	36.3302	20.389	5.63827	7.88199
						2010	9	10	253	35.7	22.8	29.25	80	35.6285	36.7686	20.4744	5.64988	7.96271
						2010	9	11	254	35.7	23	29.35	80.5	35.7478	36.3198	20.3832	5.63665	7.87985
						2010	9	12	255	35.7	23	29.35	80	34.4797	35.0313	19.6601	5.43669	7.61552
						2010	9	13	256	35.7	20.8	28.25	58	33.1593	39.5259	20.4795	5.53116	8.42661
						2010	9	14	257	33.2	18.4	25.8	35	29.9843	35.5014	18.4563	4.71953	8.94809
						2010	9	15	258	33.9	22	27.95	30	36.7311	34.968	20.2735	5.43985	9.61185
						2010	9	16	259	35	21.8	28.4	22.5	34.6594	36.6004	20.1478	5.45932	10.932
						2010	9	17	260	35.1	21.7	28.4	19.5	33.8851	36.3248	19.8464	5.37763	11.1881
						2010	9	18	261	34.9	20.7	27.8	16.5	31.7501	36.0681	19.143	5.11967	11.3604
						2010	9	19	262	37.1	21.2	29.15	30.5	30.3592	38.6169	19.3691	5.3335	10.6528
						2010	9	20	263	35.7	22.6	29.15	34.5	33.6636	35.2794	19.4947	5.36809	9.34231
						2010	9	21	264	35.7	23.5	29.6	39.5	31.8654	31.1006	17.8081	4.95068	7.85292
						2010	9	22	265	34.8	23.9	29.35	44.5	23.1582	20.194	12.2332	3.38289	4.9308
						2010	9	23	266	33.2	22.9	28.05	56.5	32.123	26.4694	16.4951	4.4357	5.7686
						2010	9	24	267	35.8	23.6	29.7	76.5	26.05	25.4248	14.5582	4.05573	5.66731
						2010	9	25	268	30.2	19.9	25.05	63.5	10.4859	8.64037	5.38448	1.3532	2.08057
						2010	9	26	269	32.7	19.6	26.15	62	28.1614	29.5132	16.3084	4.20375	6.22579
						2010	9	27	270	35.3	20.3	27.8	58	27.9358	33.5229	17.3112	4.62976	7.17084
						2010	9	28	271	33.3	22.4	27.85	37	32.6722	28.4901	17.2588	4.62083	7.30559
						2010	9	29	272	34	18.6	26.3	27.5	26.0295	32.0683	16.3435	4.2272	8.91062
						2010	9	30	273	35.3	21	28.15	44	26.5124	30.3302	16.0412	4.32306	7.11854
						2010	10	1	274	32.4	20.8	26.6	53	30.8881	28.6641	16.8322	4.3832	6.09612
						2010	10	2	275	31.2	18.1	24.65	53.5	21.5357	22.5694	12.4714	3.10499	4.75246
						2010	10	3	276	28.2	18	23.1	49	14.2129	11.5977	7.26277	1.74218	2.6094
						2010	10	4	277	31.4	19	25.2	54	28.553	28.3246	16.0873	4.05713	5.91042
						2010	10	5	278	29.5	16.6	23.05	75	26.7687	27.6253	15.383	3.68555	5.58031
						2010	10	6	279	27.8	16.6	22.2	80	33.5265	30.0397	17.9522	4.21158	5.944
						2010	10	7	280	28.3	15.5	21.9	65.5	20.9104	21.4122	11.9698	2.78705	4.32403
						2010	10	8	281	26.8	17.5	22.15	66.5	13.0029	9.67416	6.34456	1.48657	2.17439
						2010	10	9	282	26.2	14	20.1	61	23.3648	22.8041	13.0576	2.90248	4.41923
						2010	10	10	283	23.9	12.2	18.05	66	26.8097	25.0938	14.6725	3.08504	4.60234
						2010	10	11	284	25.3	13.2	19.25	71	29.0839	28.1532	16.1869	3.51739	5.26938
						2010	10	12	285	23.2	13.4	18.3	68.5	24.7226	19.3825	12.3831	2.62182	3.65807
						2010	10	13	286	25.8	14	19.9	72.5	19.1791	18.1051	10.5412	2.33077	3.56973
						2010	10	14	287	28.8	17.5	23.15	80.5	22.406	20.255	12.051	2.89432	4.20339
						2010	10	15	288	26.7	18.2	22.45	76	5.70861	3.88186	2.66293	0.628628	1.10978
						2010	10	16	289	29	17.5	23.25	66	20.7009	19.0449	11.232	2.70421	3.98247
						2010	10	17	290	28.6	17.3	22.95	27.5	27.0675	24.469	14.5582	3.47939	6.57944
						2010	10	18	291	30.1	16.9	23.5	37.5	25.1713	26.5809	14.6323	3.5443	6.39391
						2010	10	19	292	30.8	17.3	24.05	42.5	22.1409	23.9122	13.0161	3.19481	5.49628
						2010	10	20	293	32.3	18.7	25.5	84	21.0808	22.9359	12.4387	3.15887	4.88469
						2010	10	21	294	31.4	19.9	25.65	73	9.27398	8.53206	5.03194	1.28231	2.07777
						2010	10	22	295	31	16.8	23.9	61.5	21.948	24.9329	13.233	3.2364	5.14686
						2010	10	23	296	30.7	17	23.85	45	18.0484	19.7811	10.6886	2.61098	4.45957
						2010	10	24	297	28.9	17	22.95	53	23.2342	22.119	12.8239	3.06491	4.53847
						2010	10	25	298	27.5	15.7	21.6	54.5	22.2926	21.0442	12.2524	2.8313	4.23242
						2010	10	26	299	28.1	15.1	21.6	50.5	20.5283	21.3494	11.8425	2.73658	4.28826
						2010	10	27	300	28	17	22.5	40	23.1348	20.3586	12.2767	2.90172	4.77193
						2010	10	28	301	27.2	17.6	22.4	44	17.8716	13.7254	8.85969	2.08888	3.18811
						2010	10	29	302	24.9	15.5	20.2	46.5	18.741	14.0932	9.1934	2.04893	3.0229
						2010	10	30	303	22.5	11	16.75	95	23.7815	21.8789	12.9035	2.61471	3.91996
						2010	10	31	304	21.7	10.4	16.05	58.5	24.8777	22.4894	13.3804	2.65641	3.93864
						2010	11	1	305	23.2	9.5	16.35	46	23.0342	25.2455	13.6412	2.7322	4.672
						2010	11	2	306	23.8	10.4	17.1	57	22.4757	24.0939	13.1639	2.6945	4.32402
						2010	11	3	307	24	12	18	64.5	22.4815	21.5822	12.4605	2.6163	4.00276
						2010	11	4	308	24.7	10	17.35	55.5	21.2882	25.035	13.0593	2.69223	4.50979
						2010	11	5	309	26.5	10.8	18.65	79	19.9228	25.0231	12.6305	2.70014	4.65837
						2010	11	6	310	26.9	12.9	19.9	67.5	20.8831	23.389	12.502	2.76432	4.50373
						2010	11	7	311	25.2	11.6	18.4	75	19.6077	21.3331	11.5695	2.45636	4.00017
						2010	11	8	312	24.2	9.8	17	82.5	18.1436	20.9014	11.016	2.24839	3.78639
						2010	11	9	313	25.1	15	20.05	91	21.763	17.5845	11.0662	2.4566	3.48893
						2010	11	10	314	27.2	12.6	19.9	70	18.6763	21.814	11.4179	2.52463	4.22532
						2010	11	11	315	27.3	13.1	20.2	75	18.5077	21.0247	11.1588	2.48696	4.11206
						2010	11	12	316	26	11.9	18.95	49	18.6575	21.0457	11.2094	2.41607	4.06045
						2010	11	13	317	27	13.1	20.05	68	17.1994	19.1257	10.2598	2.27758	3.76223
						2010	11	14	318	27.4	13.8	20.6	71.5	16.853	18.3361	9.94412	2.23958	3.66407
						2010	11	15	319	29.3	14.9	22.1	70	16.0803	18.5245	9.76325	2.28473	3.80673
						2010	11	16	320	25.5	13.9	19.7	70.5	15.98	14.8294	8.70812	1.91524	2.97772
						2010	11	17	321	25.2	12.1	18.65	66	16.5108	17.3033	9.56143	2.04404	3.33201
						2010	11	18	322	24.9	12	18.45	63	16.3745	16.8985	9.40986	2.0006	3.24678
						2010	11	19	323	27.2	13.2	20.2	84	17.5239	19.6268	10.4909	2.33812	3.86336
						2010	11	20	324	26.9	13.3	20.1	74	18.2807	19.8894	10.7865	2.39767	3.90182
						2010	11	21	325	24.6	12	18.3	71	18.014	18.1581	10.2309	2.16616	3.44947
						2010	11	22	326	23.5	11.1	17.3	56.5	18.4039	18.2567	10.3691	2.1346	3.37831
						2010	11	23	327	21.9	10.8	16.35	30.5	15.8348	14.0613	8.44099	1.69064	3.33867
						2010	11	24	328	19.4	10	14.7	33	17.6408	13.2659	8.65369	1.6495	2.92832
						2010	11	25	329	19.5	9.8	14.65	41.5	13.8369	10.7374	6.89515	1.31228	2.20336
						2010	11	26	330	20.7	8.7	14.7	33	14.6251	14.0401	8.10603	1.54511	3.07595
						2010	11	27	331	23.5	10.4	16.95	38.5	15.6215	16.3713	9.04643	1.84374	3.53494
						2010	11	28	332	23.9	10.7	17.3	65.5	15.3857	16.2473	8.94385	1.84119	3.04467
						2010	11	29	333	25.4	12.2	18.8	36.5	15.8546	16.7425	9.21642	1.97839	3.87345
						2010	11	30	334	23.5	11.6	17.55	43	16.4812	15.6901	9.09668	1.88599	3.269
						2010	12	1	335	23	0	11.5	34	10.0444	18.4818	7.70743	1.32448	3.40005
						2010	12	2	336	24.7	9.4	17.05	36.5	14.1899	17.3684	8.88063	1.81516	3.82783
						2010	12	3	337	26.6	13.2	19.9	39	13.8586	14.8564	8.11692	1.79474	3.4662
						2010	12	4	338	25.7	15.2	20.45	59	16.9157	14.2092	8.77009	1.96745	2.91477
						2010	12	5	339	23	13	18	80.5	17.254	13.8032	8.72989	1.83299	2.68739
						2010	12	6	340	19.3	8.7	14	68	14.9356	12.6654	7.78028	1.45108	2.20822
						2010	12	7	341	17.6	11.5	14.55	76.5	17.7855	8.67931	7.0283	1.3335	1.64382
						2010	12	8	342	19.7	7.7	13.7	61	15.3382	14.7247	8.50128	1.57059	2.48822
						2010	12	9	343	18.1	7.3	12.7	68	16.003	13.8266	8.41461	1.50523	2.26223
						2010	12	10	344	15.7	5.6	10.65	75.5	7.78133	6.28732	3.95671	0.660214	1.07827
						2010	12	11	345	11	8.7	9.85	66.5	0.724717	0.133348	0.175854	0.0285178	0.273199
						2010	12	12	346	11	7.1	9.05	74.5	4.29334	1.33952	1.35659	0.213629	0.400064
						2010	12	13	347	7.6	3.8	5.7	71.5	12.7584	3.87857	3.97932	0.54846	0.509491
						2010	12	14	348	6.7	2.6	4.65	74	4.57503	1.50061	1.4822	0.19516	0.263403
						2010	12	15	349	10.7	4.6	7.65	77	7.54606	3.68248	2.98198	0.445103	0.60439
						2010	12	16	350	12.3	3.8	8.05	68	16.9086	11.4979	7.88747	1.19582	1.47109
						2010	12	17	351	11.8	0	5.9	32.5	10.6157	10.0212	5.83458	0.81101	1.32485
						2010	12	18	352	13.8	5.9	9.85	42	11.018	6.96335	4.9549	0.803522	1.23959
						2010	12	19	353	12.2	7.8	10	20.5	7.30064	2.56983	2.45023	0.399503	0.821328
						2010	12	20	354	16.3	7.2	11.75	37	18.9268	13.7787	9.1352	1.58323	2.56211
						2010	12	21	355	16.8	7.1	11.95	33	17.5599	13.6265	8.75041	1.5268	2.68502
						2010	12	22	356	16.8	7.3	12.05	36	17.9263	13.624	8.84043	1.5477	2.60405
						2010	12	23	357	16.1	6	11.05	37.5	16.8307	13.5992	8.55823	1.4481	2.4315
						2010	12	24	358	15.5	6.8	11.15	39.5	19.074	13.2755	9.00163	1.5284	2.33566
						2010	12	25	359	16.8	5.1	10.95	40	16.1296	15.0973	8.82745	1.48847	2.56943
						2010	12	26	360	16.3	5.5	10.9	39	14.2878	12.3447	7.51273	1.26458	2.17913
						2010	12	27	361	18.7	6.6	12.65	34	13.7009	13.2624	7.62536	1.36181	2.67507
						2010	12	28	362	17.4	7.6	12.5	40	11.5709	9.07162	5.79565	1.02994	1.79746
						2010	12	29	363	17.1	5.8	11.45	36	14.8782	13.4499	8.00219	1.37279	2.50248
						2010	12	30	364	10.9	5.5	8.2	28.5	5.64413	2.43827	2.09852	0.320004	0.648548
						2010	12	31	365	7.6	3	5.3	37	6.03229	2.21988	2.07005	0.280454	0.413606
																	1352.15	2066.89
																	ETo-HS	ETo-TURC (Ousman Couly (2016)

## Sheet: 2011
	DİYARBAKIR					year	month	day	DOY	Tmax	Tmin	Tmean	RHmean.	Ra	Rs=0.16(Tmax-Tmin)^0.5*Ra	Rs=from meteorological station	ETo-HS	ETo-TURC (Ousman Couly (2016)
	DOY	246					#	#		°C	°C	°C	%	MJ m-2 day-1*(0.408 mm day-1)
	φ (-)	37.89	0.661305			2011	1	1	1	9.2	1.4	5.3	57.5	17.459	10.8944	7.80164	1.05698	1.0509
	tan(φ)		0.778198			2011	1	2	2	10.6	3.9	7.25	64.5	3.11991	1.67227	1.29211	0.189834	0.380031
	sin(φ)		0.614147			2011	1	3	3	10.3	4.6	7.45	83.5	4.64193	2.11672	1.77319	0.262595	0.432758
	cos(φ)		0.789191			2011	1	4	4	7.8	4.8	6.3	64	10.9295	2.62308	3.02888	0.428121	0.432143
	dr	0.984766		(1+0.033*cos(2*3.14/365*DOY))		2011	1	5	5	14.6	5.6	10.1	94	12.3516	8.89319	5.92879	0.970149	1.37005
	δ	0.120494		(0.409*sin(2*3.14/365*DOY-1.39))		2011	1	6	6	12.4	6.3	9.35	73	12.6138	6.15556	4.98462	0.793725	0.981509
	tan(δ)	0.121081				2011	1	7	7	13.1	6.6	9.85	78.5	6.54037	3.40099	2.66796	0.432655	0.674718
	sin(δ)	0.120203				2011	1	8	8	8.1	6.6	7.35	65.5	63.4805	7.61765	12.4396	1.8349	0.989659
	cos(δ)	0.992749				2011	1	9	9	13.8	5.8	9.8	69.5	27.1603	17.3826	12.2914	1.98965	2.38539
	X	0.991122				2011	1	10	10	12.1	3.3	7.7	65.5	19.2158	13.528	9.12054	1.36405	1.64229		-
	ωs (eq. 25)	1.49064		(acos{(-1*tan(-0.35)*tan(0.409*sin(2*3.14/365*DOY-1.39))))		2011	1	11	11	11.8	2.3	7.05	67	23.1725	17.6111	11.4276	1.66552	1.95269
	sin ωs	0.996789				2011	1	12	12	11.8	1.8	6.8	67	10.8986	8.71884	5.51428	0.795595	1.04519
	sin φ*sin δ	-0.0738224		(sin(0.35)*sin(0.409*sin(2*3.14/365*DOY-1.39)))		2011	1	13	13	10.5	0.3	5.4	81.5	21.8355	17.8178	11.1579	1.51824	1.63361
	cos φ*cos δ	0.783469		(cos(0.35)*cos(0.409*sin(2*3.14/365*DOY-1.39))		2011	1	14	14	10.9	1.7	6.3	70	10.1762	7.48971	4.93857	0.698049	0.878365
	Gsc	0.082				2011	1	15	15	11.5	2.2	6.85	72	21.5205	16.0112	10.5006	1.51809	1.75917
						2011	1	16	16	14.3	3.9	9.1	65	2.46846	2.05376	1.27369	0.200947	0.485043
	Ra	24.8453				2011	1	17	17	11.2	2.1	6.65	49.5	10.8817	7.92191	5.25217	0.753158	0.960137
						2011	1	18	18	14.1	2.6	8.35	62	7.97834	7.34007	4.32894	0.663928	1.04539
						2011	1	19	19	14.4	3.1	8.75	95	8.19577	7.40897	4.40807	0.686406	1.08488
						2011	1	20	20	14.3	2.7	8.5	100	31.5903	29.3158	17.2149	2.65538	3.52146
						2011	1	21	21	14.6	2.9	8.75	99	31.2607	29.26	17.1085	2.66406	3.5805
						2011	1	22	22	13.8	4.5	9.15	68	27.1608	20.2076	13.2527	2.09474	2.61893
						2011	1	23	23	14.3	4.2	9.25	71.5	24.7488	19.997	12.5844	1.9965	2.61173
						2011	1	24	24	13.1	3.5	8.3	79.5	15.2728	11.7295	7.57135	1.159	1.52607
						2011	1	25	25	13.8	6.7	10.25	77.5	41.0732	23.3296	17.5109	2.88077	3.19884
						2011	1	26	26	8.5	3.9	6.2	78.5	56.0183	20.6148	19.2234	2.70588	2.05842
						2011	1	27	27	8.9	6.6	7.75	73	27.0026	4.96848	6.55224	0.981858	0.745406
						2011	1	28	28	12.6	6.3	9.45	98.5	45.8238	23.0952	18.4027	2.94114	3.01759
						2011	1	29	29	8.9	5.5	7.2	56	33.4136	9.08851	9.85787	1.44541	1.12389
						2011	1	30	30	11.6	7.5	9.55	97	49.886	16.3626	16.1618	2.59248	2.22521
						2011	1	31	31	11.1	4.2	7.65	60.5	45.4608	25.0944	19.1065	2.85192	2.84626
						2011	2	1	32	8.1	-0.2	3.95	89.5	49.0871	32.5938	22.627	2.88638	2.24118
						2011	2	2	33	7.8	0.7	4.25	99	21.4991	12.2115	9.16576	1.18535	0.978814
						2011	2	3	34	10.6	-0.4	5.1	99	38.1687	33.5885	20.2546	2.72037	2.80635
						2011	2	4	35	6.2	1.8	4	99	45.0127	15.8445	15.1071	1.93155	1.17046
						2011	2	5	36	9.7	0	4.85	98.5	39.652	30.77	19.7593	2.62487	2.48892
						2011	2	6	37	12.9	-0.8	6.05	96.5	24.6717	27.0401	14.611	2.04378	2.59542
						2011	2	7	38	12.2	0.3	6.25	76	14.3572	13.668	7.92432	1.11775	1.43676
						2011	2	8	39	16.6	4	10.3	73.5	43.2476	43.5936	24.5622	4.04801	5.76552
						2011	2	9	40	15.3	4.5	9.9	69	34.465	29.7778	18.1222	2.94414	3.9278
						2011	2	10	41	8.4	4.9	6.65	76	42.2123	11.8195	12.6355	1.81193	1.32445
						2011	2	11	42	9.3	1.5	5.4	72	38.4026	23.9632	17.1604	2.33498	2.1379
						2011	2	12	43	11.4	-0.9	5.25	71	19.4889	19.1771	10.936	1.47842	1.70924
						2011	2	13	44	12.2	2.1	7.15	95	17.6698	14.2772	8.98488	1.31477	1.63783
						2011	2	14	45	7.1	3.7	5.4	99.5	31.8483	8.66273	9.39605	1.2785	0.882356
						2011	2	15	46	7.2	4.3	5.75	100	73.2967	17.0048	19.9712	2.75843	1.64031
						2011	2	16	47	13	5.6	9.3	82	37.0786	21.9506	16.1384	2.56506	2.85222
						2011	2	17	48	10.4	3.9	7.15	82	50.1397	26.0727	20.4531	2.99293	2.81817
						2011	2	18	49	15.4	5.9	10.65	76	37.9277	28.8251	18.7042	3.12096	3.97918
						2011	2	19	50	13.7	6	9.85	59.5	46.7218	28.7807	20.7437	3.36394	3.7933
						2011	2	20	51	11.7	5.6	8.65	76.5	20.4333	9.97143	8.07463	1.25261	1.36756
						2011	2	21	52	16.2	6.6	11.4	81.5	42.983	33.011	21.3085	3.64925	4.69874
						2011	2	22	53	13.6	4.3	8.95	80.5	47.7571	35.5313	23.3023	3.65587	4.35826
						2011	2	23	54	16.5	8.3	12.4	79	47.428	31.1128	21.7301	3.8489	4.65808
						2011	2	24	55	17.5	7.1	12.3	81	37.2411	30.9846	19.2158	3.39229	4.61954
						2011	2	25	56	17.8	9.8	13.8	83	42.4049	27.1392	19.1903	3.55661	4.34175
						2011	2	26	57	14.4	8.4	11.4	92	54.2832	26.0559	21.2746	3.64344	3.76771
						2011	2	27	58	16.6	4.4	10.5	85.5	30.979	30.2356	17.3128	2.87357	4.12626
						2011	2	28	59	10.2	7	8.6	87.5	78.0826	19.9891	22.3485	3.46036	2.49419
						2011	3	1	60	16.8	4.8	10.8	95	44.892	43.0963	24.8817	4.17363	5.86371
						2011	3	2	61	16.2	6.7	11.45	68.5	46.778	35.5512	23.0687	3.95746	5.05133
						2011	3	3	62	13.3	6	9.65	84	27.6637	16.1556	11.9589	1.92532	2.21427
						2011	3	4	63	16.4	2.3	9.35	86.5	34.763	39.2127	20.8856	3.32571	4.91646
						2011	3	5	64	16.5	5.7	11.1	87	33.6186	29.0464	17.6771	2.99624	4.105
						2011	3	6	65	15.3	4.1	9.7	42	30.1821	27.0432	16.1614	2.60663	3.95204
						2011	3	7	66	12.9	6.3	9.6	53	37.9211	20.0223	15.5874	2.5049	2.67505
						2011	3	8	67	14.6	8	11.3	63.5	60.9276	32.1698	25.0441	4.27432	4.56319
						2011	3	9	68	14.1	7.4	10.75	60.5	61.1647	32.7843	25.3313	4.24163	4.51334
						2011	3	10	69	8.6	3.2	5.9	49	74.9717	32.3878	27.875	3.87463	3.06032
						2011	3	11	70	11.3	2.4	6.85	62	57.9754	41.2785	27.6731	4.00077	4.21478
						2011	3	12	71	13	2.4	7.7	56	54.1015	45.8781	28.1827	4.21493	5.04405
						2011	3	13	72	16.4	3.3	9.85	93.5	45.2615	47.434	26.211	4.25057	6.08538
						2011	3	14	73	16.6	4.2	10.4	89.5	37.5532	37.2528	21.1582	3.49941	4.99375
						2011	3	15	74	18.3	4.8	11.55	64.5	33.6796	36.374	19.7995	3.40824	5.1872
						2011	3	16	75	20.5	6.3	13.4	49.5	41.9876	47.6979	25.3154	4.63242	7.33438
						2011	3	17	76	23.7	7.3	15.5	35.5	31.1593	40.8811	20.1897	3.94314	8.172
						2011	3	18	77	24.3	9.8	17.05	58.5	29.8991	34.683	18.2164	3.72334	6.06438
						2011	3	19	78	22.9	13.1	18	79.5	44.7039	35.0478	22.3912	4.70142	6.27967
						2011	3	20	79	21.4	11.7	16.55	88	37.8279	29.3545	18.8503	3.79763	5.11334
						2011	3	21	80	23.3	12.7	18	68.5	41.8031	35.449	21.7762	4.57228	6.34751
						2011	3	22	81	20.7	8.1	14.4	58	15.5119	15.636	8.80987	1.66377	2.69145
						2011	3	23	82	17.3	8.5	12.9	60	25.6838	18.0814	12.1905	2.19496	2.89123
						2011	3	24	83	18.4	8.1	13.25	79.5	37.7345	31.0933	19.3766	3.52864	4.82479
						2011	3	25	84	18	9.1	13.55	67.5	36.3108	25.8533	17.3321	3.18681	4.11124
						2011	3	26	85	21.7	6.5	14.1	56.5	33.9191	41.2457	21.1586	3.95863	6.50929
						2011	3	27	86	22	7.9	14.95	48	34.241	38.6239	20.572	3.95144	6.48012
						2011	3	28	87	20.3	8	14.15	73	49.9918	49.1919	28.0525	5.25666	7.71692
						2011	3	29	88	22.6	7.9	15.25	56.5	46.2116	54.3449	28.3485	5.49502	8.8197
						2011	3	30	89	23.3	10.2	16.75	51	39.4412	41.3344	22.8405	4.6283	7.10177
						2011	3	31	90	25.2	11.3	18.25	66	39.7142	44.1622	23.6905	5.00895	7.86983
						2011	4	1	91	26.7	12.6	19.65	96.5	36.6049	41.2904	21.9922	4.83046	7.6263
						2011	4	2	92	25.4	16.4	20.9	71.5	64.5923	46.5065	31.0043	7.03722	8.77038
						2011	4	3	93	23.4	11.8	17.6	51.5	41.618	38.6215	22.6793	4.7087	6.81355
						2011	4	4	94	21.5	10.2	15.85	56.5	53.6314	48.4828	28.8455	5.69287	8.05476
						2011	4	5	95	20.6	9.9	15.25	61.5	53.8001	46.0529	28.1576	5.45802	7.52382
						2011	4	6	96	21.2	11	16.1	62.5	59.5301	48.5765	30.4198	6.04817	8.13108
						2011	4	7	97	20.1	8.6	14.35	75	52.8018	48.5777	28.6495	5.40215	7.67956
						2011	4	8	98	20.9	9.7	15.3	75.5	56.3107	50.4544	30.1523	5.8535	8.22502
						2011	4	9	99	20.1	10.4	15.25	86.5	60.5619	46.9961	30.1791	5.84986	7.67122
						2011	4	10	100	20.5	11.2	15.85	82	62.5466	46.5346	30.5186	6.02307	7.74448
						2011	4	11	101	12.7	8.9	10.8	55.5	92.9914	28.2694	29.0038	4.86506	3.93966
						2011	4	12	102	12.4	4.9	8.65	74.5	64.4937	38.6962	28.2597	4.38391	4.62445
						2011	4	13	103	15.4	4.3	9.85	72.5	52.8831	46.9602	28.1902	4.57153	6.02716
						2011	4	14	104	18.6	5.8	12.2	50	47.4024	48.54	27.1347	4.77435	7.03981
						2011	4	15	105	21.5	8.4	14.95	63.5	49.7514	52.1395	28.8112	5.53401	8.39153
						2011	4	16	106	23.5	9.4	16.45	50.5	48.6683	54.8979	29.2399	5.8736	9.24037
						2011	4	17	107	26.7	11.6	19.15	69.5	47.6535	57.5654	29.628	6.42075	10.3703
						2011	4	18	108	28.5	15.1	21.8	84	50.1149	53.7232	29.3521	6.81715	10.2496
						2011	4	19	109	26.5	16.5	21.5	70.5	59.6267	47.7014	30.169	6.95379	9.09204
						2011	4	20	110	22.9	13.1	18	94.5	60.462	47.4022	30.2842	6.35867	8.36868
						2011	4	21	111	22	9.4	15.7	68	52.7445	53.1664	29.9559	5.88566	8.76003
						2011	4	22	112	23	12.4	17.7	72	56.8569	48.2146	29.618	6.16669	8.44102
						2011	4	23	113	19.5	9.7	14.6	77.5	58.0553	45.5154	29.0787	5.52571	7.27912
						2011	4	24	114	21.2	11.3	16.25	34.5	55.5208	43.9725	27.9507	5.58185	9.06944
						2011	4	25	115	19.1	9.9	14.5	36.5	61.3576	45.1592	29.7771	5.64096	8.58797
						2011	4	26	116	21	9.4	15.2	49.5	56.8273	52.7357	30.9675	5.9936	8.61536
						2011	4	27	117	24.4	10.9	17.65	76.5	51.1604	55.2532	30.0761	6.25324	9.6096
						2011	4	28	118	25.2	14.1	19.65	66	54.9717	48.8148	29.3036	6.43636	8.94911
						2011	4	29	119	22.2	12.3	17.25	66.5	57.3114	45.3907	28.8522	5.9311	7.87296
						2011	4	30	120	21.4	12.4	16.9	62	60.5606	43.6036	29.0691	5.91601	7.50435
						2011	5	1	121	22.5	12.6	17.55	62	58.1656	46.0672	29.2822	6.07101	8.04912
						2011	5	2	122	23	12.8	17.9	57.5	57.9954	47.3242	29.6356	6.20511	8.33433
						2011	5	3	123	24.5	12.4	18.45	58.5	53.3305	51.6239	29.6816	6.3105	9.18435
						2011	5	4	124	26.6	14.7	20.65	62.5	53.4589	50.8929	29.5062	6.65392	9.51388
						2011	5	5	125	26.3	15.2	20.75	61	55.1068	48.9348	29.3756	6.64169	9.1809
						2011	5	6	126	25.8	13.4	19.6	62.5	52.6777	52.2562	29.6795	6.51024	9.54358
						2011	5	7	127	26.2	13.3	19.75	54.5	51.9126	53.5738	29.8324	6.57001	9.80725
						2011	5	8	128	25.3	14.2	19.75	56.5	54.9151	48.7646	29.2734	6.44691	8.95992
						2011	5	9	129	26.6	14	20.3	73.5	47.6547	48.0359	27.0652	6.04789	8.93605
						2011	5	10	130	28.5	15	21.75	81.5	50.8648	54.934	29.9023	6.93616	10.4622
						2011	5	11	131	30.4	18.2	24.3	79.5	51.4002	50.1666	28.7253	7.09276	10.0165
						2011	5	12	132	21.4	13.2	17.3	88	62.0625	40.713	28.4352	5.85371	7.10688
						2011	5	13	133	22.4	11.3	16.85	76.5	52.6224	46.7287	28.0512	5.70063	8.00641
						2011	5	14	134	20.9	11.4	16.15	63	59.0337	44.8656	29.1126	5.79681	7.54681
						2011	5	15	135	24.2	11.4	17.8	37	50.8277	52.0475	29.0955	6.07496	10.7991
						2011	5	16	136	26.7	12.6	19.65	57	47.4258	53.4963	28.4934	6.25841	9.77211
						2011	5	17	137	29	15.5	22.25	84.5	48.1712	52.0249	28.3188	6.65189	10.0203
						2011	5	18	138	29.5	17.7	23.6	58.5	52.6413	49.6934	28.9326	7.02515	9.81469
						2011	5	19	139	27.9	15.1	21.5	70	48.3744	49.5354	27.6911	6.38266	9.42694
						2011	5	20	140	29	16	22.5	67	49.5744	51.5574	28.5989	6.75962	9.97841
						2011	5	21	141	27.8	16.6	22.2	57	53.3753	47.8243	28.5805	6.70498	9.23414
						2011	5	22	142	29.1	16.7	22.9	56.5	50.2223	49.8205	28.2962	6.75445	9.7233
						2011	5	23	143	29.5	18.9	24.2	39.5	54.3507	46.0894	28.3125	6.97422	10.6035
						2011	5	24	144	30.4	16.8	23.6	53.5	45.3534	49.3445	26.7608	6.49781	9.74856
						2011	5	25	145	32.1	20.4	26.25	39.5	53.1802	49.7767	29.1047	7.51929	11.7667
						2011	5	26	146	32	20.5	26.25	47.5	52.5773	48.3711	28.5277	7.37023	10.3101
						2011	5	27	147	32.6	21.5	27.05	59	53.8123	47.7853	28.6856	7.5456	9.94601
						2011	5	28	148	26.4	19.1	22.75	63.5	66.3272	38.7351	28.673	6.81918	7.62699
						2011	5	29	149	29.4	16.9	23.15	61	50.3615	50.3615	28.4888	6.8422	9.86679
						2011	5	30	150	33.2	18.8	26	57	47.6153	54.8528	28.91	7.4266	11.1941
						2011	5	31	151	34.9	17.9	26.4	51	44.435	60.4315	29.3136	7.59905	12.3593
						2011	6	1	152	37.5	23	30.25	63.5	47.7862	55.432	29.1143	8.2048	11.9207
						2011	6	2	153	33	20.7	26.85	58	49.7597	48.9636	27.9223	7.31207	10.154
						2011	6	3	154	32.8	19.9	26.35	50	50.3257	51.9362	28.9204	7.48865	10.6726
						2011	6	4	155	34.4	22.3	28.35	62	52.1614	50.4922	29.031	7.85781	10.6602
						2011	6	5	156	34.4	17.2	25.8	34.5	43.8736	60.3701	29.113	7.44461	14.9552
						2011	6	6	157	34.7	20.7	27.7	44.5	47.9683	53.7245	28.717	7.66334	12.1062
						2011	6	7	158	35.7	22.6	29.15	60	48.6322	50.9665	28.163	7.75502	10.8595
						2011	6	8	159	37.5	23.8	30.65	70.5	49.1001	53.8137	29.0779	8.26275	11.6357
						2011	6	9	160	36.2	23.6	29.9	72.5	50.5387	50.943	28.7031	8.03001	10.948
						2011	6	10	161	35.5	23.3	29.4	56.5	52.4986	51.2386	29.3391	8.1219	10.9468
						2011	6	11	162	32.7	20.6	26.65	66.5	50.6876	49.0656	28.2107	7.35452	10.147
						2011	6	12	163	31.4	19.2	25.3	66.5	49.459	48.272	27.6405	6.987	9.80122
						2011	6	13	164	31.9	19.8	25.85	55	50.2942	48.6848	27.9918	7.1661	9.96043
						2011	6	14	165	30.3	17.7	24	54	49.0252	49.4174	27.8435	6.82604	9.82603
						2011	6	15	166	32.4	18.2	25.3	44.5	45.7217	51.9398	27.5668	6.96837	11.3412
						2011	6	16	167	36	22.4	29.2	41	46.3276	50.4045	27.3357	7.53521	12.1329
						2011	6	17	168	36	20.6	28.3	38	43.0853	53.0811	27.0526	7.31439	13.0945
						2011	6	18	169	34.7	20.6	27.65	38.5	43.1231	48.6428	25.9083	6.90623	11.871
						2011	6	19	170	35.9	19.4	27.65	36	40.7289	53.7621	26.4706	7.05612	13.4697
						2011	6	20	171	35.2	23	29.1	39	47.0309	45.9021	26.2835	7.22976	11.3599
						2011	6	21	172	37.5	24.3	30.9	34	46.263	48.8537	26.8931	7.68136	13.0617
						2011	6	22	173	37.5	23.4	30.45	24	44.0353	49.6718	26.4564	7.4868	14.7434
						2011	6	23	174	37.5	23.9	30.7	29.5	44.5238	48.4419	26.2713	7.47295	13.6051
						2011	6	24	175	37.5	22.7	30.1	22.5	42.8895	50.7812	26.3999	7.41661	15.2362
						2011	6	25	176	37.5	24	30.75	32	38.0918	41.1392	22.3933	6.37641	11.3234
						2011	6	26	177	37.5	22.5	30	27.5	41.5742	49.8891	25.7626	7.22247	14.1952
						2011	6	27	178	35.4	20.8	28.1	27	42.0947	49.1666	25.735	6.92795	13.7634
						2011	6	28	179	34.2	21	27.6	24	44.4299	46.918	25.8275	6.87712	13.499
						2011	6	29	180	33.9	21.9	27.9	27.5	45.939	44.1015	25.462	6.82459	12.3059
						2011	6	30	181	33.1	19.3	26.2	39	43.6928	48.2369	25.9699	6.70178	11.4803
						2011	7	1	182	35.4	21.7	28.55	34	43.2058	47.3536	25.5872	6.95569	12.345
						2011	7	2	183	36	23.5	29.75	43	44.552	44.552	25.2024	7.02846	10.5737
						2011	7	3	184	36.3	24.1	30.2	43.5	46.1693	45.0612	25.802	7.26377	10.673
						2011	7	4	185	36.3	25.5	30.9	36	45.7007	39.4854	24.03	6.86359	10.4118
						2011	7	5	186	36.3	25.2	30.75	46.5	43.4537	38.5869	23.1637	6.59578	8.89924
						2011	7	6	187	37.1	26.5	31.8	37	46.9215	39.7894	24.4424	7.11041	10.4598
						2011	7	7	188	37.1	23.7	30.4	56	43.5867	46.7249	25.5286	7.21674	10.1329
						2011	7	8	189	36.3	21.6	28.95	18.5	40.3835	47.491	24.7732	6.79254	14.6803
						2011	7	9	190	36.3	26.2	31.25	17	43.8653	35.4432	22.305	6.41666	11.5679
						2011	7	10	191	36.3	28	32.15	25	57.7916	38.3736	26.6394	7.80418	11.6078
						2011	7	11	192	36.3	27.5	31.9	33	53.4626	37.6377	25.3753	7.39666	10.411
						2011	7	12	193	36.7	26.9	31.8	31.5	48.8476	38.2965	24.4667	7.11747	10.7553
						2011	7	13	194	36.3	24.9	30.6	41	44.9297	40.9759	24.272	6.89001	10.1107
						2011	7	14	195	37.4	26.1	31.75	64.5	44.7934	40.4932	24.092	7.00139	8.96524
						2011	7	15	196	37.2	23.5	30.35	50	42.7491	46.853	25.3167	7.14943	10.1539
						2011	7	16	197	36.6	27.5	32.05	26	50.4269	36.7108	24.339	7.11601	11.0027
						2011	7	17	198	36.8	25.9	31.35	24.5	44.7288	39.0035	23.6277	6.81102	11.7552
						2011	7	18	199	36.7	27.5	32.1	24	47.6691	35.0845	23.134	6.77048	10.7712
						2011	7	19	200	36.6	27.2	31.9	21	47.5946	35.7911	23.3475	6.80559	11.2964
						2011	7	20	201	37.1	26.1	31.6	27.5	42.7356	37.6073	22.678	6.57053	11.0273
						2011	7	21	202	37.3	26	31.65	35.5	35.2594	31.8745	18.9642	5.50007	8.62318
						2011	7	22	203	38.6	25.9	32.25	36.5	27.1329	27.567	15.471	4.5414	7.48523
						2011	7	23	204	36.8	24.9	30.85	25.5	40.2594	38.3269	22.2208	6.34032	11.3808
						2011	7	24	205	36.6	27.2	31.9	24	41.4167	31.1454	20.317	5.92221	9.61066
						2011	7	25	206	38	26.6	32.3	30.5	39.9105	36.3984	21.5605	6.33527	10.4174
						2011	7	26	207	36.3	24.5	30.4	25	37.3831	35.2897	20.5464	5.80834	10.5303
						2011	7	27	208	36.3	26.7	31.5	30	44.2752	34.0034	21.9491	6.34646	9.74521
						2011	7	28	209	36.6	30.7	33.65	27	55.9414	26.4043	21.741	6.56044	8.11722
						2011	7	29	210	36.5	28.1	32.3	19.5	44.4763	29.8881	20.6247	6.0603	9.71905
						2011	7	30	211	36.3	30	33.15	29	50.6875	25.5465	20.3559	6.0828	7.66788
						2011	7	31	212	36.5	26.1	31.3	26.5	39.5172	32.8783	20.3903	5.87182	9.78844
						2011	8	1	213	37.5	26.2	31.85	30	18.1275	16.3873	9.74985	2.83913	5.00662
						2011	8	2	214	37.5	28.9	33.2	51	29.1503	20.0554	13.6777	4.0912	4.72864
						2011	8	3	215	37.5	24.3	30.9	43.5	37.5672	39.6709	21.8381	6.23753	9.52448
						2011	8	4	216	37.5	23.3	30.4	40	35.3008	40.1017	21.2838	6.01677	10.0092
						2011	8	5	217	37.5	22.8	30.15	47.5	34.4994	40.5713	21.1636	5.95177	9.14671
						2011	8	6	218	37.5	28.2	32.85	63	43.6665	32.4879	21.3064	6.32932	7.35891
						2011	8	7	219	37.5	28.6	33.05	65.5	43.316	30.841	20.6758	6.16626	7.02173
						2011	8	8	220	37.5	26.1	31.8	63	36.6057	33.3844	19.7752	5.75269	7.47236
						2011	8	9	221	37.5	28.2	32.85	52	39.3056	29.2434	19.1786	5.69722	6.66841
						2011	8	10	222	37.5	27.7	32.6	45	38.024	29.8108	19.0454	5.62975	7.25666
						2011	8	11	223	37.5	25.1	31.3	39	34.0404	33.7681	19.179	5.523	8.69559
						2011	8	12	224	37.5	22.8	30.15	46.5	30.1837	35.496	18.5162	5.20724	8.16972
						2011	8	13	225	32.8	19.2	26	70	8.21504	8.93796	4.84729	1.24521	2.16794
						2011	8	14	226	35.2	22.5	28.85	54.5	32.1805	32.6954	18.3491	5.02036	7.09472
						2011	8	15	227	36.2	23.1	29.65	62.5	28.9061	30.2936	16.7396	4.65854	6.66639
						2011	8	16	228	37.5	23.2	30.35	70.5	23.4897	26.8722	14.2124	4.01356	6.00863
						2011	8	17	229	37.5	28.7	33.1	62	34.5476	24.3215	16.3975	4.89514	5.63427
						2011	8	18	230	37.5	26.6	32.05	69	3.63341	3.16833	1.91932	0.561152	1.1104
						2011	8	19	231	37.5	27.1	32.3	75	11.8765	9.88125	6.12809	1.80066	2.53421
						2011	8	20	232	34.5	22.6	28.55	91	18.006	17.1417	9.93826	2.70164	3.90839
						2011	8	21	233	37.5	26.3	31.9	67	13.5323	12.1249	7.24602	2.11215	2.99726
						2011	8	22	234	37.5	26.7	32.1	67.5	11.9205	10.2993	6.26794	1.8344	2.61753
						2011	8	23	235	37.5	27	32.25	55	17.1475	14.4039	8.89026	2.60967	3.48989
						2011	8	24	236	37.5	26.2	31.85	62.5	9.47246	8.56311	5.09474	1.48357	2.24511
						2011	8	25	237	37.5	26.5	32	75	13.6524	12.0141	7.24477	2.11603	2.97686
						2011	8	26	238	37.5	25.9	31.7	73	17.7425	16.4651	9.66862	2.80697	3.90451
						2011	8	27	239	37.5	25.8	31.65	77	3.11146	2.91233	1.70285	0.493869	1.0521
						2011	8	28	240	37.5	24.9	31.2	78.5	6.8274	6.88202	3.87758	1.11436	1.8783
						2011	8	29	241	37.5	25.8	31.65	73.5	19.5776	18.3247	10.7145	3.10747	4.29365
						2011	8	30	242	36	25.3	30.65	75	9.85363	8.4347	5.15713	1.46545	2.19059
						2011	8	31	243	35.5	23.5	29.5	71	17.7707	17.0598	9.8495	2.73239	3.9354
						2011	9	1	244	37.1	22.9	30	48.5	10.9743	12.4668	6.61672	1.85498	3.07288
						2011	9	2	245	36.2	21.1	28.65	51.5	8.26639	9.9858	5.13954	1.40016	2.45707
						2011	9	3	246	34.3	24.8	29.55	54	18.5954	14.1325	9.17037	2.54668	3.33571
						2011	9	4	247	35.2	23.3	29.25	66.5	16.0503	15.2799	8.85885	2.44459	3.55936
						2011	9	5	248	37.1	24.5	30.8	68.5	1.55332	1.56575	0.882201	0.251462	0.76212
						2011	9	6	249	35.3	24.3	29.8	71.5	2.37415	2.08926	1.25987	0.351722	0.861785
						2011	9	7	250	35.2	22.2	28.7	72	31.807	33.0793	18.3491	5.00421	7.16022
						2011	9	8	251	34.2	20.4	27.3	87	28.1635	31.0925	16.7396	4.42782	6.63885
						2011	9	9	252	33.3	20.4	26.85	88.5	24.7315	25.5229	14.2124	3.72182	5.49191
						2011	9	10	253	37.1	21.6	29.35	80	26.0311	32.2786	16.3975	4.53449	7.0508
						2011	9	11	254	34.9	23.7	29.3	80.5	3.58442	3.21164	1.91932	0.530196	1.08702
						2011	9	12	255	35.9	23.1	29.5	80	10.7053	10.9623	6.12809	1.70002	2.68231
						2011	9	13	256	37.1	23.9	30.5	58	17.0964	18.0538	9.93826	2.81531	4.18592
						2011	9	14	257	37.1	23.2	30.15	35	12.1471	13.5076	7.24602	2.03778	3.92075
						2011	9	15	258	35.2	20.4	27.8	30	10.183	12.0566	6.26794	1.67632	3.66235
						2011	9	16	259	37.1	22.7	29.9	22.5	14.6424	16.8681	8.89026	2.48714	5.45114
						2011	9	17	260	37.1	22.8	29.95	19.5	8.42043	9.63297	5.09474	1.4268	3.47644
						2011	9	18	261	35.9	23.3	29.6	16.5	12.7561	12.8582	7.24477	2.01405	4.54725
						2011	9	19	262	34.2	20.4	27.3	30.5	16.2669	17.9587	9.66862	2.55746	5.12855
						2011	9	20	263	34.1	18.7	26.4	34.5	2.71204	3.34124	1.70285	0.441436	1.31139
						2011	9	21	264	34.4	21.9	28.15	39.5	6.85466	6.85466	3.87758	1.045	2.08028
						2011	9	22	265	32.7	19.8	26.25	44.5	18.6448	19.2415	10.7145	2.76813	4.53875
						2011	9	23	266	30.8	20.7	25.75	56.5	10.1421	8.1948	5.15713	1.31724	2.01469
						2011	9	24	267	30.8	19.7	25.25	76.5	18.4771	16.4076	9.8495	2.48688	3.59727
						2011	9	25	268	31.3	19	25.15	63.5	11.7915	11.6029	6.61672	1.66676	2.65894
						2011	9	26	269	31.1	21.5	26.3	62	10.3674	7.96215	5.13954	1.32932	1.98439
						2011	9	27	270	30.8	15.9	23.35	58	14.8482	17.699	9.17037	2.21322	3.73515
						2011	9	28	271	31.7	18.9	25.3	37	15.4758	15.8472	8.85885	2.23935	4.13916
						2011	9	29	272	30.9	17.8	24.35	27.5	1.52339	1.59652	0.882201	0.218089	0.934492
						2011	9	30	273	26.7	15.6	21.15	44	2.36344	2.09873	1.25987	0.287807	0.824825
						2011	10	1	274	24.4	14.7	19.55	53	36.8221	28.574	18.3491	4.01951	5.37885
						2011	10	2	275	26.7	14.5	20.6	53.5	29.9534	29.2345	16.7396	3.77003	5.61905
						2011	10	3	276	26.9	13.2	20.05	49	23.9986	26.3025	14.2124	3.155	5.10683
						2011	10	4	277	26.9	14.7	20.8	54	29.3413	28.6371	16.3975	3.71222	5.53431
						2011	10	5	278	29.2	13.4	21.3	75	3.01786	3.81457	1.91932	0.440142	1.07405
						2011	10	6	279	30.7	14.9	22.8	80	9.63556	12.1793	6.12809	1.45922	2.66814
						2011	10	7	280	30.4	15.5	22.95	65.5	16.0915	19.1811	9.93826	2.37523	3.9877
						2011	10	8	281	28.6	15.8	22.2	66.5	12.6583	12.9621	7.24602	1.69992	2.78463
						2011	10	9	282	28.4	15.3	21.85	61	10.8235	11.3431	6.26794	1.45759	2.46917
						2011	10	10	283	30	17.3	23.65	66	15.5917	15.8411	8.89026	2.16126	3.40135
						2011	10	11	284	32.7	19.1	25.9	71	8.63441	9.39424	5.09474	1.30578	2.25445
						2011	10	12	285	31.4	19	25.2	68.5	12.8586	12.7557	7.24477	1.82709	2.88495
						2011	10	13	286	26.7	16.1	21.4	72.5	18.5606	15.7394	9.66862	2.22289	3.24945
						2011	10	14	287	26.6	14.1	20.35	80.5	3.01025	3.01025	1.70285	0.381013	0.910181
						2011	10	15	288	28	16.5	22.25	76	7.14648	6.57476	3.87758	0.910818	1.60443
						2011	10	16	289	28.6	15.8	22.2	66	18.7175	19.1667	10.7145	2.51363	3.9325
						2011	10	17	290	27.2	14.8	21	27.5	9.15329	9.08006	5.15713	1.17357	2.66918
						2011	10	18	291	25.2	14.3	19.75	37.5	18.6458	16.2591	9.8495	2.16916	3.81018
						2011	10	19	292	20.6	12.2	16.4	42.5	14.2686	9.58853	6.61672	1.3272	2.09348
						2011	10	20	293	19.2	9.8	14.5	84	10.4771	7.87877	5.13954	0.973632	1.51897
						2011	10	21	294	22.3	8.8	15.55	73	15.5991	16.847	9.17037	1.7937	2.98809
						2011	10	22	295	24.5	11.2	17.85	61.5	15.1821	16.1538	8.85885	1.85227	3.07311
						2011	10	23	296	26.4	12.6	19.5	45	1.48425	1.63862	0.882201	0.192994	0.699984
						2011	10	24	297	24.7	12.5	18.6	53	2.25437	2.20027	1.25987	0.268964	0.73624
						2011	10	25	298	26.8	15.1	20.95	54.5	33.5276	31.3818	18.3491	4.17018	6.0468
						2011	10	26	299	26	14.2	20.1	50.5	30.4568	28.7513	16.7396	3.72094	5.47498
						2011	10	27	300	22.5	13.4	17.95	40	29.4459	21.4366	14.2124	2.97996	4.5407
						2011	10	28	301	18.9	12.1	15.5	44	39.3011	21.3798	16.3975	3.20251	4.01438
						2011	10	29	302	21.9	10.6	16.25	46.5	3.56852	3.22594	1.91932	0.383295	0.899777
						2011	10	30	303	21.4	11.1	16.25	95	11.934	9.83363	6.12809	1.2238	1.92209
						2011	10	31	304	21.3	11.2	16.25	58.5	19.5447	15.7921	9.93826	1.9847	2.8826
						2011	11	1	305	20.9	9.2	15.05	46	13.24	12.3926	7.24602	1.39606	2.37703
						2011	11	2	306	21.4	8.1	14.75	57	10.7418	11.4293	6.26794	1.19659	2.07789
						2011	11	3	307	13.3	8.9	11.1	64.5	26.4891	9.32418	8.89026	1.50689	1.50484
						2011	11	4	308	15.8	6.1	10.95	55.5	10.2239	7.93374	5.09474	0.859069	1.3112
						2011	11	5	309	10.3	7.3	8.8	79	26.1423	6.27415	7.24477	1.13025	0.958715
						2011	11	6	310	16.8	7.5	12.15	67.5	19.8154	14.7427	9.66862	1.69836	2.33518
						2011	11	7	311	16.7	8.5	12.6	75	3.71664	2.43811	1.70285	0.303612	0.640827
						2011	11	8	312	15.3	5.4	10.35	82.5	7.70235	6.10026	3.87758	0.640188	1.03663
						2011	11	9	313	16.9	3.6	10.25	91	18.3623	19.5375	10.7145	1.76268	2.72164
						2011	11	10	314	14.8	2.9	8.85	70	9.3436	8.89511	5.15713	0.806071	1.26363
						2011	11	11	315	12.1	6.3	9.2	75	25.5611	11.8604	9.8495	1.55972	1.64407
						2011	11	12	316	13	4.4	8.7	49	14.1018	9.70201	6.61672	1.02839	1.36107
						2011	11	13	317	14	3.4	8.7	68	9.86624	8.36657	5.13954	0.798801	1.18993
						2011	11	14	318	14.3	6.3	10.3	71.5	20.2638	12.9689	9.17037	1.51134	1.90051
						2011	11	15	319	15.4	7.6	11.5	70	19.8249	12.3707	8.85885	1.52235	1.94538
						2011	11	16	320	15.7	6.9	11.3	70.5	1.85869	1.30852	0.882201	0.150567	0.452662
						2011	11	17	321	12.4	8.8	10.6	66	4.15006	1.19522	1.25987	0.209851	0.421688
						2011	11	18	322	12.7	8.8	10.75	63	58.0715	18.1183	18.3491	3.07248	2.61531
						2011	11	19	323	12.3	8.6	10.45	84	54.3907	16.0997	16.7396	2.77353	2.31534
						2011	11	20	324	14.8	7.3	11.05	74	32.4351	19.4611	14.2124	2.4048	2.8339
						2011	11	21	325	16.7	6.7	11.7	71	32.4085	25.9268	16.3975	2.83706	3.80588
						2011	11	22	326	16.6	7.6	12.1	56.5	3.99858	2.87898	1.91932	0.336579	0.687773
						2011	11	23	327	16	4.8	10.4	30.5	11.4445	10.2543	6.12809	1.01354	2.00333
						2011	11	24	328	14.1	5	9.55	33	20.5906	14.99	9.93826	1.59417	2.5599
						2011	11	25	329	12.2	1.9	7.05	41.5	14.1111	11.6276	7.24602	1.05607	1.52472
						2011	11	26	330	12.1	1.1	6.6	33	11.8116	10.3942	6.26794	0.89698	1.46972
						2011	11	27	331	11.1	-0.4	5.35	38.5	16.385	15.0742	8.89026	1.20707	1.62867
						2011	11	28	332	11.4	1.8	6.6	65.5	10.277	7.89274	5.09474	0.729088	0.945587
						2011	11	29	333	13.7	2.3	8	36.5	13.4107	12.2306	7.24477	1.09626	1.84193
						2011	11	30	334	13.1	2.8	7.95	43	18.8289	15.515	9.66862	1.46019	2.07958
						2011	12	1	335	12.2	4	8.1	34	3.71664	2.43811	1.70285	0.258669	0.604717
						2011	12	2	336	13.2	1.4	7.3	36.5	7.05505	6.65996	3.87758	0.570824	1.05919
						2011	12	3	337	13.7	1.5	7.6	39	19.1723	18.7121	10.7145	1.59615	2.50935
						2011	12	4	338	15.3	1.8	8.55	59	8.77245	9.47425	5.15713	0.796997	1.30153
						2011	12	5	339	15.5	3.3	9.4	80.5	17.6244	17.2014	9.8495	1.57127	2.3039
						2011	12	6	340	16	3.7	9.85	68	11.7915	11.6029	6.61672	1.07301	1.68254
						2011	12	7	341	15.2	2.6	8.9	76.5	9.04939	9.12178	5.13954	0.804829	1.29428
						2011	12	8	342	13.1	5.3	9.2	61	20.522	12.8057	9.17037	1.45217	1.75548
						2011	12	9	343	11.3	3.4	7.35	68	19.699	12.4498	8.85885	1.30672	1.48228
						2011	12	10	344	11.6	2.1	6.85	75.5	1.7889	1.35956	0.882201	0.127542	0.335247
						2011	12	11	345	12.1	2.3	7.2	66.5	2.51531	1.97201	1.25987	0.184728	0.408396
						2011	12	12	346	12.4	1.9	7.15	74.5	35.3916	29.729	18.3491	2.68506	3.18405
						2011	12	13	347	15	3.4	9.2	71.5	30.7183	28.5066	16.7396	2.6508	3.60584
						2011	12	14	348	13.8	4.3	9.05	74	28.8194	21.9027	14.2124	2.23809	2.79882
						2011	12	15	349	15.3	4.2	9.75	77	30.7608	27.3156	16.3975	2.64953	3.59104
						2011	12	16	350	14.7	5.2	9.95	68	3.89194	2.95787	1.91932	0.312377	0.624055
						2011	12	17	351	7.7	2.9	5.3	32.5	17.4817	6.71299	6.12809	0.830243	0.890598
						2011	12	18	352	11.6	2.5	7.05	42	20.5906	14.99	9.93826	1.44845	1.88637
						2011	12	19	353	15	4.4	9.7	20.5	13.91	11.7957	7.24602	1.16869	2.40286
						2011	12	20	354	14.8	4.9	9.85	37	12.4505	9.8608	6.26794	1.01645	1.7412
						2011	12	21	355	14.2	5.5	9.85	33	18.838	13.1112	8.89026	1.44171	2.32152
						2011	12	22	356	14.3	7.7	11	36	12.3945	6.54431	5.09474	0.860563	1.35891
						2011	12	23	357	12.5	5.8	9.15	37.5	17.4931	9.37631	7.24477	1.14512	1.58725
						2011	12	24	358	7.3	5	6.15	39.5	39.8456	7.33159	9.66862	1.35812	0.976672
						2011	12	25	359	9.3	6	7.65	40	5.85869	1.54669	1.70285	0.254175	0.435165
						2011	12	26	360	12.5	4.5	8.5	39	8.56832	5.48373	3.87758	0.598115	0.982674
						2011	12	27	361	12.9	4.1	8.5	34	22.5742	15.8922	10.7145	1.65271	2.47717
						2011	12	28	362	12.8	2.4	7.6	40	9.99473	8.31562	5.15713	0.768263	1.23973
						2011	12	29	363	12.7	3.6	8.15	36	20.4067	14.8561	9.8495	1.49906	2.21932
						2011	12	30	364	11	0.8	5.9	28.5	12.9486	10.566	6.61672	0.919727	1.44773
						2011	12	31	365	8.1	3.3	5.7	37	14.6617	5.63009	5.13954	0.70837	0.781391
																	1242.73	1857.46
																	ETo-HS	ETo-TURC (Ousman Couly (2016)

## Sheet: 2012
	DİYARBAKIR					year	month	day	DOY	Tmax	Tmin	Tmean	RHmean.	Ra	Rs=0.16(Tmax-Tmin)^0.5*Ra	Rs=from meteorological station	ETo-HS	ETo-TURC (Ousman Couly (2016)
	DOY	246					#	#		°C	°C	°C	%	MJ m-2 day-1*(0.408 mm day-1)
	φ (-)	37.89	0.661305			2012	1	1	1	7.5	4.9	6.2	80	34.4967	7.17532	8.89989	1.25275	0.839997
	tan(φ)		0.778198			2012	1	2	2	9.4	5.8	7.6	90.5	6.85469	1.97415	2.08094	0.31	0.423679
	sin(φ)		0.614147			2012	1	3	3	12.7	3.3	8	80	9.94875	7.48146	4.88037	0.738483	1.03205
	cos(φ)		0.789191			2012	1	4	4	14.8	3.2	9	65	6.86974	6.37512	3.7436	0.588426	0.98407
	dr	0.984766		(1+0.033*cos(2*3.14/365*DOY))		2012	1	5	5	12.6	2.9	7.75	69.5	2.39633	1.85955	1.19413	0.178942	0.41709
	δ	0.120494		(0.409*sin(2*3.14/365*DOY-1.39))		2012	1	6	6	8	2.5	5.25	71.5	28.5387	12.557	10.7087	1.44769	1.17719
	tan(δ)	0.121081				2012	1	7	7	10.5	4.8	7.65	78.5	22.3624	10.1973	8.54232	1.27506	1.2865
	sin(δ)	0.120203				2012	1	8	8	9	3.5	6.25	81.5	6.51204	2.8653	2.44353	0.344668	0.451806
	cos(δ)	0.992749				2012	1	9	9	7.1	4.2	5.65	72	9.79327	2.27204	2.66838	0.366993	0.369981
	X	0.991122				2012	1	10	10	12	3.8	7.9	70.5	22.7156	14.9015	10.4076	1.56875	1.81712		-
	ωs (eq. 25)	1.49064		(acos{(-1*tan(-0.35)*tan(0.409*sin(2*3.14/365*DOY-1.39))))		2012	1	11	11	8.8	4.2	6.5	68	31.334	11.5309	10.7526	1.53246	1.27656
	sin ωs	0.996789				2012	1	12	12	12.3	4.4	8.35	81.5	21.8562	13.8131	9.82898	1.50747	1.76297
	sin φ*sin δ	-0.0738224		(sin(0.35)*sin(0.409*sin(2*3.14/365*DOY-1.39)))		2012	1	13	13	8.4	5.3	6.85	90.5	38.8901	9.64475	10.9557	1.58389	1.14045
	cos φ*cos δ	0.783469		(cos(0.35)*cos(0.409*sin(2*3.14/365*DOY-1.39))		2012	1	14	14	11.4	3.9	7.65	83.5	9.73894	5.84336	4.26739	0.636969	0.830639
	Gsc	0.082				2012	1	15	15	8	4.9	6.45	74.5	20.4661	5.0756	5.7655	0.820005	0.667955
						2012	1	16	16	9.8	4.2	7	62	27.3605	12.2575	10.3595	1.50681	1.41518
	Ra	24.8453				2012	1	17	17	7.3	4.5	5.9	70	35.7769	8.01403	9.5786	1.33143	0.884224
						2012	1	18	18	9.8	2.5	6.15	88.5	26.1557	15.2749	11.307	1.58826	1.5653
						2012	1	19	19	4.2	-1.4	1.4	83	32.5579	14.5859	12.3274	1.38816	0.441302
						2012	1	20	20	4.4	-4.3	0.05	57.5	20.2123	14.0677	9.53882	0.998622	0.0166409
						2012	1	21	21	4.9	-2.9	1	67	25.1432	15.6894	11.2354	1.23884	0.344475
						2012	1	22	22	4.2	-1.3	1.45	83	37.7198	16.5967	14.1537	1.59797	0.510619
						2012	1	23	23	8.1	1.5	4.8	88.5	34.7185	18.3314	14.271	1.8916	1.5347
						2012	1	24	24	10.1	-0.5	4.8	88	24.322	20.625	12.6699	1.67938	1.70707
						2012	1	25	25	3.7	1	2.35	95	23.4364	5.06226	6.16159	0.728175	0.300313
						2012	1	26	26	4.9	1.4	3.15	87.5	11.0923	3.10585	3.32029	0.40797	0.279545
						2012	1	27	27	7.4	3.9	5.65	78.5	19.1773	5.36963	5.74038	0.789498	0.632714
						2012	1	28	28	12.1	2.6	7.35	77.5	30.8901	23.4765	15.2336	2.24702	2.60641
						2012	1	29	29	10	1.1	5.55	73.5	33.1819	23.6255	15.8386	2.16906	2.15297
						2012	1	30	30	7	2.6	4.8	83	31.7625	11.1804	10.6601	1.41299	0.997291
						2012	1	31	31	5.6	0.1	2.85	81.5	16.3961	7.2143	6.15238	0.745128	0.460524
						2012	2	1	32	6.3	1.5	3.9	85	44.347	17.0292	15.5455	1.97848	1.22302
						2012	2	2	33	9.3	-1.9	3.7	69.5	30.4793	27.3094	16.3205	2.05798	1.80327
						2012	2	3	34	10.7	-1	4.85	65.5	29.9425	28.0262	16.3871	2.1769	2.2811
						2012	2	4	35	14.2	2.5	8.35	65	20.6916	19.3673	11.3242	1.73678	2.37868
						2012	2	5	36	14.1	1.2	7.65	63	11.498	11.8659	6.6075	0.986264	1.46122
						2012	2	6	37	13.2	0.8	7	65.5	12.3971	12.2979	6.98475	1.01595	1.41917
						2012	2	7	38	6.1	2.2	4.15	82	29.8917	9.32622	9.44503	1.21592	0.766944
						2012	2	8	39	10.3	3.2	6.75	77	26.1287	14.8411	11.1395	1.60393	1.62889
						2012	2	9	40	8.4	5.3	6.85	82	32.2925	8.00854	9.09709	1.31519	0.981431
						2012	2	10	41	12.3	4.5	8.4	69	30.9423	19.308	13.8267	2.12466	2.38121
						2012	2	11	42	10.3	0.2	5.25	70	28.1865	22.7747	14.3325	1.93759	1.99839
						2012	2	12	43	12.5	-0.3	6.1	67	11.7359	12.0176	6.71804	0.941691	1.26433
						2012	2	13	44	12.8	2.2	7.5	67.5	22.2764	18.8904	11.6043	1.72189	2.16797
						2012	2	14	45	15.9	3.2	9.55	58.5	14.3823	14.6124	8.20066	1.31545	2.01415
						2012	2	15	46	14.1	6.1	10.1	55.5	36.1903	23.1618	16.3779	2.67997	3.14994
						2012	2	16	47	13.3	5.5	9.4	70.5	42.1271	26.2873	18.8248	3.00308	3.389
						2012	2	17	48	6.8	2.5	4.65	77.5	57.0309	19.6186	18.9219	2.49143	1.59252
						2012	2	18	49	7.1	1.8	4.45	82	50.5808	21.4463	18.6313	2.43132	1.66932
						2012	2	19	50	9.2	-0.6	4.3	79	36.6004	28.6947	18.3324	2.37618	2.12622
						2012	2	20	51	9	-0.7	4.15	68.5	34.7149	26.9387	17.299	2.22702	1.95015
						2012	2	21	52	10.8	-0.7	5.05	63.5	32.4049	29.8125	17.5825	2.35632	2.49094
						2012	2	22	53	11	-0.6	5.2	64	32.0706	29.7615	17.4765	2.3575	2.54181
						2012	2	23	54	11.1	1.1	6.1	59.5	35.2957	28.2366	17.8584	2.50327	2.7179
						2012	2	24	55	12.8	1.6	7.2	61	25.8369	23.1499	13.8347	2.02851	2.53763
						2012	2	25	56	13.4	2.2	7.8	59	35.6839	31.9728	19.1074	2.86886	3.61244
						2012	2	26	57	16.2	2.1	9.15	58	27.9187	31.4923	16.7735	2.65126	3.94436
						2012	2	27	58	13.4	6.2	9.8	59.5	32.4593	18.6966	13.9356	2.25581	2.54635
						2012	2	28	59	15.2	4.7	9.95	51.5	25.4163	21.3497	13.1773	2.14466	2.89779
						2012	3	1	60	11.9	1.4	6.65	64	15.6373	13.1353	8.10729	1.16258	1.44974
						2012	3	2	61	7	0.4	3.7	79.5	24.7758	13.0816	10.184	1.28418	0.930581
						2012	3	3	62	7.2	-1.7	2.75	77	4.05256	2.88543	1.93439	0.233144	0.238961
						2012	3	4	63	11.1	0.1	5.6	70	24.5258	21.5827	13.0149	1.78617	1.99494
						2012	3	5	64	7.5	1	4.25	74	49.5424	25.762	20.2094	2.61354	1.90624
						2012	3	6	65	9.3	-0.7	4.3	67	40.6465	32.5172	20.5657	2.66565	2.39023
						2012	3	7	66	7.9	3	5.45	80	51.0561	20.014	18.0828	2.4658	1.82615
						2012	3	8	67	7.6	2	4.8	86.5	48.6864	21.8115	18.4341	2.44342	1.79624
						2012	3	9	68	14.3	8	11.15	69.5	41.9913	21.1636	16.8636	2.86329	3.07365
						2012	3	10	69	17.7	4.5	11.1	68	14.4911	15.3026	8.42383	1.42783	2.29303
						2012	3	11	70	14.2	4.6	9.4	50	10.1148	7.7682	5.01435	0.799929	1.17733
						2012	3	12	71	14.3	0.5	7.4	47.5	14.3445	15.8363	8.52599	1.26012	1.90141
						2012	3	13	72	13.3	6.8	10.05	61	27.4619	14.2802	11.2023	1.82979	2.03598
						2012	3	14	73	17.3	7.3	12.3	60.5	28.2444	22.5955	14.2906	2.52282	3.44783
						2012	3	15	74	16.1	7	11.55	57.5	24.5221	17.8521	11.8358	2.03739	2.68936
						2012	3	16	75	14.2	5.9	10.05	67.5	25.3224	16.8141	11.6725	1.90659	2.35113
						2012	3	17	76	9.7	2.7	6.2	60	8.66439	4.85206	3.66781	0.516281	0.62937
						2012	3	18	77	8.6	-0.1	4.25	45	40.1939	27.9749	18.9688	2.4531	2.20467
						2012	3	19	78	3.5	0.3	1.9	26	84.3364	21.5901	24.1385	2.78897	1.10826
						2012	3	20	79	18.3	2.3	10.3	47	28.2806	36.1991	18.0996	2.98293	5.0394
						2012	3	21	80	19.3	9.7	14.5	46.5	37.6486	28.9141	18.664	3.53569	4.96039
						2012	3	22	81	21.3	8.5	14.9	45	26.3245	26.9563	15.069	2.89002	4.80762
						2012	3	23	82	20.2	9	14.6	44	45.4456	40.7193	24.3344	4.62417	7.10684
						2012	3	24	83	18.1	7.1	12.6	46.5	46.0715	40.5429	24.4483	4.35904	6.33516
						2012	3	25	84	19.7	6.9	13.3	46	42.1148	43.1255	24.1079	4.39732	6.96383
						2012	3	26	85	21	7.7	14.35	45.5	39.2999	41.8151	22.9318	4.32401	7.08238
						2012	3	27	86	20.1	12.1	16.1	53.5	43.059	27.5578	19.4863	3.87433	4.75795
						2012	3	28	87	18.6	7.7	13.15	70	29.8528	26.0316	15.7695	2.86251	4.07239
						2012	3	29	88	14.8	4.7	9.75	63	42.962	34.7133	21.8457	3.52984	4.49447
						2012	3	30	89	13.2	5.8	9.5	71	35.9666	21.2922	15.6544	2.50649	2.81064
						2012	3	31	90	16.2	5.4	10.8	69	19.4494	16.8043	10.2267	1.71542	2.45186
						2012	4	1	91	16.2	6.4	11.3	71.5	28.2452	22.1443	14.1475	2.41457	3.22786
						2012	4	2	92	19.2	6.6	12.9	63	30.1376	30.3787	17.1165	3.08191	4.65385
						2012	4	3	93	22.8	11.7	17.25	53.5	49.8858	44.2986	26.5925	5.46657	7.69188
						2012	4	4	94	22.9	10.9	16.9	60	46.3734	44.5184	25.7027	5.23091	7.6546
						2012	4	5	95	23.8	10.3	17.05	50	44.7262	48.3043	26.2935	5.37427	8.31073
						2012	4	6	96	25	11.5	18.25	49.5	41.2035	44.4998	24.2226	5.12147	7.9839
						2012	4	7	97	26.9	12.8	19.85	47.5	41.4219	46.7239	24.8863	5.49532	8.92695
						2012	4	8	98	28.8	13.9	21.35	59	14.9573	17.8292	9.23778	2.12113	3.62682
						2012	4	9	99	28.5	14.4	21.45	59.5	30.514	34.4198	18.3328	4.22023	6.6604
						2012	4	10	100	28	13.1	20.55	57.5	41.0925	48.9823	25.3791	5.70833	9.15207
						2012	4	11	101	24.8	13.3	19.05	71	49.4813	45.5228	26.8479	5.80251	8.25778
						2012	4	12	102	25.3	12.6	18.95	57	29.9218	30.4005	17.0612	3.67735	5.62196
						2012	4	13	103	22.7	9.3	16	62.5	14.4627	15.504	8.47072	1.67921	2.81503
						2012	4	14	104	24.8	12.3	18.55	57.5	30.3475	30.3475	17.1671	3.65991	5.55981
						2012	4	15	105	27.5	14.3	20.9	55.5	28.8497	30.4653	16.7706	3.80652	5.87537
						2012	4	16	106	24.8	14.2	19.5	74	38.1251	32.3301	19.8602	4.34471	6.03099
						2012	4	17	107	17.6	11.4	14.5	62	62.0425	30.7731	24.7175	4.68248	5.00744
						2012	4	18	108	24.1	11	17.55	60.5	39.0999	40.9767	22.6429	4.6945	7.1983
						2012	4	19	109	26.2	12.6	19.4	61.5	45.6117	49.6255	26.9132	5.87187	9.04119
						2012	4	20	110	20.4	12.6	16.5	59.5	63.2432	39.4637	28.2606	5.68517	6.74754
						2012	4	21	111	25.2	12.1	18.65	60.5	39.9184	41.8345	23.1168	4.9419	7.54678
						2012	4	22	112	25.5	11.3	18.4	57	43.4279	49.3341	26.1838	5.55917	8.78213
						2012	4	23	113	25	12.4	18.7	54.5	46.6558	47.029	26.4978	5.67246	8.44935
						2012	4	24	114	26.6	12.5	19.55	54	47.3728	53.4365	28.4616	6.23472	9.74004
						2012	4	25	115	28.3	15.4	21.85	54	51.4048	53.0497	29.5405	6.86957	10.1354
						2012	4	26	116	29.9	14.9	22.4	53	46.1742	55.4091	28.6131	6.7462	10.6758
						2012	4	27	117	30.5	15.4	22.95	54	36.393	43.9627	22.627	5.40782	8.63352
						2012	4	28	118	30.1	16.4	23.25	55	23.1382	25.3594	13.7028	3.29906	5.17233
						2012	4	29	119	30.8	16.8	23.8	55	42.1039	47.1564	25.2062	6.1499	9.36443
						2012	4	30	120	32.6	18.8	25.7	55.5	37.9573	41.9048	22.5608	5.75588	8.61196
						2012	5	1	121	29	20.6	24.8	51.5	30.4144	20.4385	14.1039	3.52385	4.35174
						2012	5	2	122	31.5	18.5	25	54	18.6485	19.3944	10.7581	2.70051	4.1626
						2012	5	3	123	27.8	17	22.4	55	24.4007	21.0822	12.8302	3.02502	4.30235
						2012	5	4	124	25	15.9	20.45	71.5	45.5577	33.166	21.9889	4.9329	6.30481
						2012	5	5	125	24.8	15.4	20.1	60	39.7643	29.9027	19.5064	4.33595	5.67939
						2012	5	6	126	27	14.4	20.7	65.5	44.4389	44.7945	25.2388	5.69899	8.42738
						2012	5	7	127	27	13.4	20.2	59.5	43.2515	47.0577	25.5206	5.68778	8.74326
						2012	5	8	128	25.3	13.9	19.6	64	46.8356	42.7141	25.3016	5.54994	7.8679
						2012	5	9	129	27.5	14.4	20.95	63.5	37.9113	39.731	21.9545	4.98958	7.55512
						2012	5	10	130	29.8	16.1	22.95	58.5	47.2725	51.8107	27.9955	6.6909	10.1048
						2012	5	11	131	26.6	15.8	21.2	56	56.8368	49.107	29.8855	6.83587	9.29465
						2012	5	12	132	30.9	16.4	23.65	58	50.5104	58.592	30.774	7.4813	11.5107
						2012	5	13	133	31	19.5	25.25	56	52.3789	48.1886	28.4201	7.17574	9.77779
						2012	5	14	134	29.7	17.5	23.6	57.5	47.8213	46.6736	26.7252	6.48917	9.24234
						2012	5	15	135	27.8	17.5	22.65	62.5	57.4384	47.3292	29.4945	6.99725	9.21639
						2012	5	16	136	29.2	14.6	21.9	64	49.6323	57.9706	30.3432	7.06512	11.0502
						2012	5	17	137	29.8	15.5	22.65	58.5	48.5143	55.5004	29.3534	6.96377	10.7403
						2012	5	18	138	29.8	19	24.4	54.5	42.6485	36.8483	22.4252	5.55029	7.47536
						2012	5	19	139	32.3	15.9	24.1	60.5	35.0862	46.0332	22.7342	5.58677	9.19509
						2012	5	20	140	26.4	20.2	23.3	56	34.3433	17.0343	13.6823	3.29813	3.60665
						2012	5	21	141	30.8	18.1	24.45	54.5	52.1906	53.0256	29.7587	7.37409	10.5893
						2012	5	22	142	28.5	13	20.75	55	34.1609	42.3595	21.5187	4.86528	7.99781
						2012	5	23	143	29.7	13.3	21.5	56	29.7022	38.9693	19.2455	4.43599	7.49753
						2012	5	24	144	31.5	18.4	24.95	58.5	48.9611	51.3113	28.3535	7.10904	10.3387
						2012	5	25	145	31.4	18.5	24.95	57.5	42.121	43.4689	24.2055	6.06901	8.8204
						2012	5	26	146	27.5	15.2	21.35	56.5	44.8597	44.142	25.1727	5.78001	8.41778
						2012	5	27	147	27.6	13.4	20.5	55.5	51.73	58.7653	31.1894	7.00606	10.894
						2012	5	28	148	30.5	17.3	23.9	53.5	51.8746	54.7796	30.1552	7.37507	10.8315
						2012	5	29	149	30.7	18.2	24.45	52.5	55.9127	55.9127	31.629	7.83755	11.144
						2012	5	30	150	33.2	16.9	25.05	43.5	47.9782	62.5636	30.9926	7.78891	13.7001
						2012	5	31	151	32.8	20	26.4	49.5	53.1924	54.469	30.4491	7.89342	11.2605
						2012	6	1	152	31.6	14.8	23.2	46	46.3848	62.3412	30.4194	7.3148	12.8238
						2012	6	2	153	30	17.9	23.95	47.5	54.5176	52.773	30.3424	7.42974	10.8313
						2012	6	3	154	32.2	18.7	25.45	45	52.2772	56.4594	30.7326	7.79566	12.2353
						2012	6	4	155	34.5	20.7	27.6	45.5	49.7193	54.8901	29.5518	7.8688	12.1799
						2012	6	5	156	37.3	22.6	29.95	43	47.5815	55.9558	29.1888	8.17444	13.1884
						2012	6	6	157	35.8	22.6	29.2	41.5	52.2658	55.1926	30.3825	8.3751	13.1558
						2012	6	7	158	36.8	20	28.4	40	46.6038	62.6355	30.563	8.28144	15.0058
						2012	6	8	159	34.2	19.4	26.8	33	49.857	59.0307	30.6886	8.0275	15.0984
						2012	6	9	160	33.4	17.6	25.5	41.5	46.1883	58.382	29.3752	7.45995	13.2365
						2012	6	10	161	34.9	21.4	28.15	39.5	51.1504	55.2425	30.0702	8.10382	13.3339
						2012	6	11	162	38.4	23.2	30.8	38	48.1126	58.505	30.0124	8.55471	14.7979
						2012	6	12	163	40.3	25.4	32.85	32.5	49.5437	59.0561	30.5986	9.08969	16.2665
						2012	6	13	164	40.8	23.4	32.1	33.5	44.984	62.6177	30.0229	8.7866	16.8935
						2012	6	14	165	39.9	28.1	34	35	38.9883	36.8049	21.4286	6.51017	10.1592
						2012	6	15	166	41.1	27.2	34.15	28	49.6524	55.2135	29.6188	9.02447	16.2218
						2012	6	16	167	42.2	26.8	34.5	28	48.9268	60.2779	30.7204	9.42317	17.7103
						2012	6	17	168	41.7	29.4	35.55	29	52.9331	52.0862	29.703	9.294	15.3544
						2012	6	18	169	40.2	27.8	34	22.5	51.5711	51.1586	29.0561	8.82745	15.9536
						2012	6	19	170	36.7	24.1	30.4	25	49.2309	49.6247	27.9604	7.9042	14.5686
						2012	6	20	171	38.7	24.2	31.45	23.5	47.5257	55.1299	28.9556	8.36387	16.5567
						2012	6	21	172	37.7	26.5	32.1	25	45.0836	40.3949	24.1406	7.06506	12.1816
						2012	6	22	173	39.3	26	32.65	28	53.2464	56.6542	31.0696	9.19317	16.3997
						2012	6	23	174	38	26.2	32.1	30	56.531	53.3653	31.0705	9.09319	15.0638
						2012	6	24	175	34.3	21.4	27.85	33.5	54.1385	55.8709	31.1115	8.32971	14.4308
						2012	6	25	176	37.6	24.9	31.25	21	54.359	55.2287	30.9951	8.91662	16.9798
						2012	6	26	177	36.7	21.5	29.1	21.5	48.7886	59.3269	30.434	8.37145	17.6784
						2012	6	27	178	37	24.1	30.55	28.5	53.6474	55.3641	30.8293	8.74235	15.6145
						2012	6	28	179	39.2	26.4	32.8	34	53.2458	54.5237	30.4797	9.04543	14.7955
						2012	6	29	180	37.9	26.2	32.05	34.5	54.5756	51.0828	29.8684	8.73263	13.7147
						2012	6	30	181	34	22.1	28.05	26	56.2331	53.5339	31.0374	8.34627	15.0873
						2012	7	1	182	34.5	22.1	28.3	29	54.1595	53.7262	30.5144	8.25039	14.7016
						2012	7	2	183	32.7	21.1	26.9	18	53.4696	49.6198	29.1378	7.63891	14.996
						2012	7	3	184	31.9	20.3	26.1	32.5	53.3106	49.4722	29.0511	7.47988	12.6883
						2012	7	4	185	33.9	21.1	27.5	26.5	53.349	54.6293	30.5387	8.11367	15.1967
						2012	7	5	186	33.2	20.7	26.95	27	52.522	52.522	29.711	7.7979	14.4498
						2012	7	6	187	34.4	23.3	28.85	27.5	54.857	48.713	29.2424	8.00079	13.6921
						2012	7	7	188	36.1	23.9	30	25	55.2452	53.9193	30.8741	8.65546	15.7093
						2012	7	8	189	37.2	24.9	31.05	25	54.9843	54.1046	30.854	8.83983	15.9409
						2012	7	9	190	37.9	25.4	31.65	21.5	53.7973	53.7973	30.4324	8.82613	16.54
						2012	7	10	191	37.9	25.3	31.6	30	52.9244	53.3478	30.0581	8.70875	14.9835
						2012	7	11	192	37.9	25.3	31.6	27	53.0313	53.4555	30.1188	8.72634	15.513
						2012	7	12	193	38.3	25	31.65	22	52.846	56.2282	30.836	8.94319	17.1718
						2012	7	13	194	41	26.3	33.65	22	50.0837	58.8984	30.7238	9.27103	18.3079
						2012	7	14	195	41.5	28.2	34.85	19	51.7725	55.086	30.2096	9.3285	17.8787
						2012	7	15	196	41.9	27.8	34.85	21	48.9478	55.2131	29.4078	9.0809	17.5636
						2012	7	16	197	42	29	35.5	20	50.9164	52.953	29.3731	9.18215	17.1357
						2012	7	17	198	41.4	29.2	35.3	24	52.8342	51.5662	29.5267	9.19555	16.0089
						2012	7	18	199	42.4	29.8	36.1	27.5	51.8038	52.2182	29.4216	9.30087	15.7165
						2012	7	19	200	44.2	30.3	37.25	14	50.3993	56.044	30.0643	9.70682	19.4554
						2012	7	20	201	43.1	29.3	36.2	19	48.2463	53.2639	28.6763	9.08209	17.5054
						2012	7	21	202	43.2	30.4	36.8	13.5	49.5067	50.6949	28.3393	9.07506	17.6865
						2012	7	22	203	43.2	29.8	36.5	24	48.2584	51.733	28.2648	9.00146	16.2177
						2012	7	23	204	40.8	28.9	34.85	17	52.1913	49.6861	28.8066	8.89524	16.5108
						2012	7	24	205	43.4	30.4	36.9	17.5	51.4143	53.4708	29.6603	9.51548	17.9314
						2012	7	25	206	42.9	28	35.45	19.5	46.897	55.9013	28.964	9.04578	18.1362
						2012	7	26	207	42.6	26.6	34.6	16.5	43.8614	56.1426	28.0713	8.62705	18.6194
						2012	7	27	208	41.2	29.4	35.3	16.5	50.3833	47.5618	27.6916	8.62402	15.9715
						2012	7	28	209	39.2	26.4	32.8	16	49.3238	50.5076	28.2346	8.37916	16.623
						2012	7	29	210	43	29.3	36.15	18.5	47.515	52.0764	28.1392	8.9037	17.2077
						2012	7	30	211	42	29	35.5	35.5	48.0379	49.9594	27.7125	8.66305	13.6922
						2012	7	31	212	40.9	28.7	34.8	45.5	49.1451	47.9656	27.465	8.47294	11.5405
						2012	8	1	213	41.1	27.6	34.35	25	47.8244	51.6503	28.1149	8.59921	15.7372
						2012	8	2	214	39.7	26.4	33.05	24	46.8106	49.8065	27.3143	8.14609	15.1758
						2012	8	3	215	39.3	24.8	32.05	20	45.8888	53.231	27.9583	8.17417	16.6887
						2012	8	4	216	39.5	22.5	31	15.5	40.1432	54.5948	26.4824	7.57957	17.6787
						2012	8	5	217	39.6	23.4	31.5	17	42.7693	55.4291	27.5429	7.96388	17.7734
						2012	8	6	218	40.9	23.1	32	21	39.8033	56.6798	26.8688	7.84776	17.5431
						2012	8	7	219	40.7	29.4	35.05	22.5	49.2493	44.5214	26.4886	8.21056	14.0943
						2012	8	8	220	40.3	29	34.65	21	47.5001	42.9401	25.5478	7.859	13.778
						2012	8	9	221	38.7	24.6	31.65	26	42.2289	47.6342	25.3711	7.35824	14.0437
						2012	8	10	222	38.3	25.1	31.7	23.5	46.3437	48.9389	26.94	7.82115	14.803
						2012	8	11	223	40.3	28.1	34.2	17	46.6495	45.5299	26.0704	7.95094	15.0991
						2012	8	12	224	39.8	27.8	33.8	21	46.9422	45.0645	26.018	7.87394	14.3192
						2012	8	13	225	39.3	25.9	32.6	25	42.0461	45.0735	24.6263	7.27942	13.5895
						2012	8	14	226	38.8	24.9	31.85	23.5	40.7762	45.3431	24.324	7.08307	13.7807
						2012	8	15	227	39	23.7	31.35	21.5	38.3922	46.9921	24.0275	6.92629	14.4814
						2012	8	16	228	38.4	22.4	30.4	27.5	38.5387	49.3296	24.6648	6.97256	14.1043
						2012	8	17	229	37	22.7	29.85	27.5	40.2773	46.0772	24.3696	6.8105	13.1322
						2012	8	18	230	38.9	27.2	33.05	24.5	46.9114	43.909	25.6738	7.65685	13.3812
						2012	8	19	231	39.5	28.3	33.9	21.5	47.8814	42.9017	25.6387	7.77417	13.6058
						2012	8	20	232	38.3	23.2	30.75	25.5	41.0074	49.5369	25.4959	7.25985	14.522
						2012	8	21	233	37.4	25.9	31.65	25.5	46.0234	42.3416	24.9717	7.24239	12.6156
						2012	8	22	234	38.4	28.2	33.3	23.5	48.398	39.4928	24.7314	7.41202	12.2519
						2012	8	23	235	38.4	25.2	31.8	24	41.7109	44.0467	24.2469	7.05353	13.3279
						2012	8	24	236	38.4	26.5	32.45	20	43.5486	41.4583	24.0363	7.08389	13.189
						2012	8	25	237	38.4	24.7	31.55	19	40.2081	44.0681	23.8119	6.89206	13.9931
						2012	8	26	238	38.4	25.7	32.05	18	38.6652	39.2839	22.0466	6.44578	12.7309
						2012	8	27	239	38.4	26.7	32.55	17.5	39.3198	36.8033	21.5191	6.35465	12.0854
						2012	8	28	240	38.4	33	35.7	16	64.5134	27.8698	23.9865	7.52642	9.71619
						2012	8	29	241	40.2	25.6	32.9	15	36.0877	42.1505	22.0626	6.56042	14.1297
						2012	8	30	242	40.8	27.2	34	16.5	39.2395	42.6925	23.1533	7.03413	14.2428
						2012	8	31	243	35.1	27.9	31.5	21	55.367	31.8914	23.7704	6.87309	10.0925
						2012	9	1	244	34.1	22.8	28.45	28.5	44.5894	40.3088	23.9823	6.50535	11.2494
						2012	9	2	245	36.6	23.7	30.15	30.5	41.2204	42.5395	23.688	6.66169	11.8124
						2012	9	3	246	36.3	22.1	29.2	32	38.9196	44.2126	23.4656	6.46842	11.921
						2012	9	4	247	36.6	23.8	30.2	29.5	40.0104	40.9707	22.9033	6.44774	11.5309
						2012	9	5	248	37.8	26	31.9	23	41.2257	38.917	22.6584	6.6047	11.9815
						2012	9	6	249	39.7	25.5	32.6	20	38.5751	43.8213	23.2579	6.87496	13.925
						2012	9	7	250	39.9	24.3	32.1	17.5	37.7013	47.0512	23.8253	6.97279	15.2026
						2012	9	8	251	37.9	22	29.95	24.5	36.9665	47.0214	23.5845	6.60494	13.8394
						2012	9	9	252	37.1	21.4	29.25	25.5	37.3135	46.8658	23.6557	6.52775	13.5429
						2012	9	10	253	34.1	24.3	29.2	27.5	42.8832	33.6204	21.4793	5.92088	9.66409
						2012	9	11	254	35.8	21.9	28.85	25	33.3382	37.072	19.887	5.44113	10.84
						2012	9	12	255	36.3	24.4	30.35	25	38.2946	36.4565	21.1364	5.96891	10.8531
						2012	9	13	256	34.7	24	29.35	27.5	41.7633	35.7494	21.8578	6.04445	10.258
						2012	9	14	257	34.6	21.6	28.1	26	37.7215	39.2304	21.7611	5.85816	11.2146
						2012	9	15	258	34.4	20.7	27.55	22	25.9542	28.4458	15.3705	4.0882	8.58066
						2012	9	16	259	37.2	23.1	30.15	19.5	31.6841	35.7396	19.0358	5.35337	11.2432
						2012	9	17	260	38.4	23	30.7	17	31.3702	38.6481	19.6969	5.60283	12.4831
						2012	9	18	261	36.6	22.2	29.4	19	33.5618	38.6632	20.3773	5.641	12.0701
						2012	9	19	262	34.3	18.8	26.55	19.5	34.2752	42.5013	21.5907	5.61601	12.6816
						2012	9	20	263	35.1	19.4	27.25	24	33.9486	42.6394	21.5224	5.68662	12.265
						2012	9	21	264	32.3	15.6	23.95	29.5	30.3217	40.5098	19.8259	4.85464	10.4983
						2012	9	22	265	31.8	19.3	25.55	33	39.2886	39.2886	22.225	5.65066	10.0452
						2012	9	23	266	33.1	19.2	26.15	34	36.249	40.3088	21.6233	5.57378	10.2617
						2012	9	24	267	32.8	20.3	26.55	25.5	38.3146	38.3146	21.674	5.63769	10.8049
						2012	9	25	268	33.6	19.4	26.5	23.5	30.2793	34.3972	18.2562	4.74331	9.95703
						2012	9	26	269	33.7	20	26.85	20.5	33.4145	36.6223	19.7886	5.18209	10.9442
						2012	9	27	270	34.4	19.4	26.9	20	33.6641	40.3969	20.8609	5.46901	12.0797
						2012	9	28	271	34	20.2	27.1	20	35.1177	38.7699	20.873	5.49667	11.6479
						2012	9	29	272	36.1	20.6	28.35	18	32.331	40.0905	20.366	5.51246	12.4606
						2012	9	30	273	35.4	22.7	29.05	18.5	34.2234	34.771	19.5139	5.36195	10.9269
						2012	10	1	274	36.6	23	29.8	14.5	33.0851	35.9966	19.5219	5.45	11.8366
						2012	10	2	275	36.6	28	32.3	18	37.8632	26.0499	17.7659	5.22026	8.68015
						2012	10	3	276	37	23.7	30.35	29.5	29.9423	31.8586	17.4715	4.93395	9.10574
						2012	10	4	277	31.8	23.3	27.55	35	27.0208	18.3741	12.6045	3.35253	4.98767
						2012	10	5	278	31.5	21.5	26.5	34	40.7144	32.5715	20.6	5.35229	8.42961
						2012	10	6	279	31.3	18.7	25	32	34.7541	35.0321	19.7384	4.95476	9.04188
						2012	10	7	280	24.7	16.2	20.45	28	40.3525	27.4397	18.8235	4.22279	6.94046
						2012	10	8	281	30.3	19.8	25.05	32	32.9551	27.6823	17.0859	4.29394	7.25712
						2012	10	9	282	29.7	17.6	23.65	38.5	23.9848	23.2173	13.349	3.2452	5.58918
						2012	10	10	283	28.3	14.3	21.3	63	29.6261	33.1813	17.7361	4.06728	6.41587
						2012	10	11	284	26.2	17	21.6	51.5	32.5985	23.9925	15.8202	3.65574	4.77181
						2012	10	12	285	27.5	18.6	23.05	54.5	40.1002	28.5514	19.1409	4.58587	5.75421
						2012	10	13	286	27.3	14.5	20.9	49	32.4079	33.1856	18.5513	4.2107	6.45727
						2012	10	14	287	29	16.2	22.6	39.5	28.0836	28.7576	16.076	3.80914	6.61
						2012	10	15	288	29.9	17.2	23.55	34	31.9588	32.4701	18.2227	4.41932	8.04088
						2012	10	16	289	30.9	18.2	24.55	33	32.9963	33.5243	18.8143	4.67314	8.5175
						2012	10	17	290	31.9	18.8	25.35	29.5	32.318	33.8693	18.7155	4.73641	9.05437
						2012	10	18	291	32.2	18.5	25.35	28	30.8283	33.7878	18.257	4.62038	9.18357
						2012	10	19	292	32.5	20.2	26.35	29.5	22.2818	21.9252	12.5032	3.23758	6.13344
						2012	10	20	293	31.1	19.3	25.2	55.5	31.7504	29.9724	17.4506	4.40095	6.23062
						2012	10	21	294	24.8	17.8	21.3	69.5	40.3211	22.5798	17.0687	3.91423	4.48746
						2012	10	22	295	26.4	14.5	20.45	63.5	31.0417	29.5517	17.1332	3.8436	5.65846
						2012	10	23	296	36.5	17.3	26.9	76.5	24.0165	36.8893	16.8376	4.41424	7.75773
						2012	10	24	297	21.8	15.4	18.6	71.5	35.4358	18.1431	14.3434	3.06212	3.47215
						2012	10	25	298	21.8	14.4	18.1	85	25.7378	15.2368	11.2023	2.35869	2.93718
						2012	10	26	299	16.6	13.4	15	82.5	56.9074	14.5683	16.2878	3.13333	2.58204
						2012	10	27	300	18.4	11.6	15	57	40.3397	21.9448	16.8309	3.23779	3.7254
						2012	10	28	301	21.9	12.1	17	70.5	9.56638	7.50004	4.7916	0.977976	1.57936
						2012	10	29	302	23.6	11.9	17.75	69	17.8264	16.6855	9.75613	2.03416	3.15458
						2012	10	30	303	24.1	12.5	18.3	59.5	25.0694	23.2644	13.6613	2.89247	4.31939
						2012	10	31	304	23.7	12.9	18.3	60	16.3566	14.1321	8.60052	1.82096	2.7636
						2012	11	1	305	25.2	13.4	19.3	60	22.6392	21.3714	12.4429	2.70748	4.09241
						2012	11	2	306	25.9	14.7	20.3	56	23.6295	21.172	12.6527	2.82733	4.14696
						2012	11	3	307	25	14.7	19.85	49	13.5615	11.1747	6.96382	1.53773	2.37562
						2012	11	4	308	26.2	17.7	21.95	64.5	25.8584	17.5837	12.0623	2.81214	3.623
						2012	11	5	309	26.6	15	20.8	61	18.5693	17.2323	10.1191	2.29086	3.48017
						2012	11	6	310	26.9	15.3	21.1	75	20.2327	18.776	11.0256	2.51548	3.78073
						2012	11	7	311	26.2	14.7	20.45	76	22.6818	20.8673	12.3068	2.76087	4.10543
						2012	11	8	312	25.7	13.7	19.7	67	23.2347	22.3053	12.878	2.83235	4.29343
						2012	11	9	313	24.4	13.3	18.85	68.5	24.0263	21.3353	12.8076	2.75303	4.0439
						2012	11	10	314	20.9	13.9	17.4	68	33.6645	18.8521	14.2509	2.94206	3.48648
						2012	11	11	315	20	12.5	16.25	71	33.2301	19.9381	14.5607	2.90782	3.55093
						2012	11	12	316	14.9	9.8	12.35	72	38.2893	15.622	13.8351	2.44646	2.47936
						2012	11	13	317	19.5	9.4	14.45	70.5	23.1884	18.7362	11.791	2.23023	3.16778
						2012	11	14	318	21.5	11.1	16.3	65.5	21.4282	17.8282	11.0566	2.21128	3.21556
						2012	11	15	319	22.3	11.7	17	64.5	24.9103	21.124	12.9764	2.6485	3.82305
						2012	11	16	320	19.4	10.3	14.85	69	25.7903	18.7754	12.448	2.38369	3.21788
						2012	11	17	321	21	11.1	16.05	62.5	24.2099	19.1742	12.1879	2.41967	3.40741
						2012	11	18	322	19	10.7	14.85	81.5	21.6101	14.3491	9.96129	1.90751	2.53526
						2012	11	19	323	17.2	11.2	14.2	82.5	18.2258	8.74838	7.14302	1.3406	1.63392
						2012	11	20	324	16.6	11.3	13.95	77.5	17.296	7.3335	6.37094	1.18636	1.40767
						2012	11	21	325	20.4	8.3	14.35	69.5	16.7281	16.1928	9.31021	1.75553	2.77108
						2012	11	22	326	19.5	10.7	15.1	69.5	25.9052	18.2372	12.2955	2.37253	3.16119
						2012	11	23	327	17.7	10.6	14.15	71	15.631	8.87843	6.66403	1.24875	1.65053
						2012	11	24	328	13.9	10.9	12.4	76	43.922	10.5413	12.172	2.15595	1.77207
						2012	11	25	329	17.3	10	13.65	70.5	20.7211	12.1011	8.95767	1.65228	2.09598
						2012	11	26	330	13.6	10.2	11.9	69.5	37.5109	10.203	11.0667	1.92771	1.68583
						2012	11	27	331	16.5	9.6	13.05	77.5	24.2362	13.3784	10.1861	1.84303	2.23092
						2012	11	28	332	18.6	8	13.3	73	6.30877	5.34983	3.28638	0.59944	1.0839
						2012	11	29	333	18.2	7.7	12.95	69	5.76374	4.84154	2.98826	0.538929	0.995587
						2012	11	30	334	16.7	7.4	12.05	74	12.3422	9.18256	6.02216	1.0543	1.5567
						2012	12	1	335	17	7.1	12.05	82	36.1971	28.6681	18.2227	3.19025	4.24758
						2012	12	2	336	18.2	7.6	12.9	86	36.1173	30.6274	18.8143	3.38762	4.6895
						2012	12	3	337	18.3	8.3	13.3	82.5	36.9897	29.5918	18.7155	3.41373	4.61569
						2012	12	4	338	16.1	7.9	12	92.5	39.8476	26.14	18.257	3.1909	3.88947
						2012	12	5	339	12.4	8.8	10.6	81	41.1861	11.8616	12.5032	2.08261	1.79082
						2012	12	6	340	13	4.8	8.9	84	38.0875	24.9854	17.4506	2.73268	3.12557
						2012	12	7	341	9.5	4.6	7.05	84	48.1929	18.8916	17.0687	2.48769	2.07961
						2012	12	8	342	9.4	6.9	8.15	86	67.7249	13.545	17.1332	2.60762	1.70634
						2012	12	9	343	14.3	8.2	11.25	72.5	42.6084	20.7929	16.8376	2.86876	3.04016
						2012	12	10	344	11.8	6.7	9.25	70	39.696	16.196	14.3434	2.27556	2.16227
						2012	12	11	345	9.9	7.5	8.7	76.5	45.1942	8.67728	11.2023	1.74109	1.22529
						2012	12	12	346	12	6.8	9.4	83	44.6418	18.571	16.2878	2.59837	2.46747
						2012	12	13	347	14.2	4.9	9.55	78	34.4942	25.6637	16.8309	2.69981	3.34683
						2012	12	14	348	14.1	5.5	9.8	78	10.212	7.02587	4.7916	0.775636	1.11669
						2012	12	15	349	12.2	5.6	8.9	80.5	23.7348	12.532	9.75613	1.52777	1.68795
						2012	12	16	350	11	2.4	6.7	79	29.1155	20.0315	13.6613	1.96303	2.11734
						2012	12	17	351	10.4	2	6.2	81	18.5466	12.4633	8.60052	1.21061	1.31941
						2012	12	18	352	5.7	1.7	3.7	83	38.8841	12.4429	12.4429	1.56902	0.891405
						2012	12	19	353	6.1	3.6	4.85	84	50.0142	10.0028	12.6527	1.68081	0.915948
						2012	12	20	354	8.1	6.1	7.1	62	30.776	4.92416	6.96382	1.01699	0.69856
						2012	12	21	355	8.7	6.8	7.75	66.5	54.6933	8.31339	12.0623	1.80755	1.09864
						2012	12	22	356	8.5	5.9	7.2	75	39.2227	8.15831	10.1191	1.48372	1.03037
						2012	12	23	357	8.3	5.4	6.85	76	40.4654	9.38798	11.0256	1.594	1.11549
						2012	12	24	358	11.2	7.4	9.3	76.5	39.458	11.9952	12.3068	1.95607	1.6711
						2012	12	25	359	13.8	7.7	10.75	70	32.5883	15.9031	12.878	2.15636	2.32862
						2012	12	26	360	14.6	7.6	11.1	84	30.2551	16.9429	12.8076	2.17087	2.50928
						2012	12	27	361	14.8	5.4	10.1	61.5	29.0508	21.8462	14.2509	2.33192	2.98582
						2012	12	28	362	15.2	5	10.1	67	28.4946	23.2516	14.5607	2.38262	3.16114
						2012	12	29	363	13.3	3.7	8.5	76	27.9079	21.4333	13.8351	2.13406	2.63761
						2012	12	30	364	12.5	2.8	7.65	75	23.6617	18.3614	11.791	1.75998	2.14131
						2012	12	31	365	13.5	3.6	8.55	77.5	21.9626	17.3944	11.0566	1.70872	2.19293
										13.2	3					10.6019
																	1589.7	2664.24
																	ETo-HS	ETo-TURC (Ousman Couly (2016)

## Sheet: 2013
	DİYARBAKIR					year	month	day	DOY	Tmax	Tmin	Tmean	RHmean.	Ra	Rs=0.16(Tmax-Tmin)^0.5*Ra	Rs=from meteorological station	ETo-HS	ETo-TURC (Ousman Couly (2016)
	DOY	246					#	#		°C	°C	°C	%	MJ m-2 day-1*(0.408 mm day-1)
	φ (-)	37.89	0.661305			2013	1	1	1	11.7	2.3	7	70	18.1426	13.6433	8.89989	1.29451	1.55187
	tan(φ)		0.778198			2013	1	2	2	13	2.7	7.85	70.5	4.05248	3.33924	2.08094	0.313051	0.578208
	sin(φ)		0.614147			2013	1	3	3	13.8	3.4	8.6	65.5	9.45836	7.86936	4.88037	0.755657	1.12507
	cos(φ)		0.789191			2013	1	4	4	13.6	2.6	8.1	72	7.05461	6.20805	3.7436	0.568665	0.902009
	dr	0.984766		(1+0.033*cos(2*3.14/365*DOY))		2013	1	5	5	6.5	3	4.75	87.5	3.98932	1.11701	1.19413	0.157931	0.239105
	δ	0.120494		(0.409*sin(2*3.14/365*DOY-1.39))		2013	1	6	6	7.9	5	6.45	82.5	39.3022	9.1181	10.7087	1.52305	1.04478
	tan(δ)	0.121081				2013	1	7	7	8	5.2	6.6	77	31.9063	7.14702	8.54232	1.22246	0.874951
	sin(δ)	0.120203				2013	1	8	8	8	1.2	4.6	77.5	5.85658	3.18598	2.44353	0.321022	0.383854
	cos(δ)	0.992749				2013	1	9	9	1.8	0.2	1	90	13.1846	1.68763	2.66838	0.29422	0.0731916
	X	0.991122				2013	1	10	10	5.5	-0.2	2.65	82.5	27.2455	12.4239	10.4076	1.24828	0.675535		-
	ωs (eq. 25)	1.49064		(acos{(-1*tan(-0.35)*tan(0.409*sin(2*3.14/365*DOY-1.39))))		2013	1	11	11	4.3	-3	0.65	88	24.8733	14.526	10.7526	1.16353	0.213938
	sin ωs	0.996789				2013	1	12	12	4.4	0.9	2.65	88.5	32.8363	9.19417	9.82898	1.17888	0.525209
	sin φ*sin δ	-0.0738224		(sin(0.35)*sin(0.409*sin(2*3.14/365*DOY-1.39)))		2013	1	13	13	8.2	0.2	4.2	79	24.2089	15.4937	10.9557	1.41361	1.1924
	cos φ*cos δ	0.783469		(cos(0.35)*cos(0.409*sin(2*3.14/365*DOY-1.39))		2013	1	14	14	12.2	1	6.6	84	7.96954	7.14071	4.26739	0.610689	0.874353
	Gsc	0.082				2013	1	15	15	13.1	1.7	7.4	80.5	10.6725	9.73328	5.7655	0.852129	1.21083
						2013	1	16	16	10.5	0.4	5.45	70	20.3731	16.4615	10.3595	1.41263	1.53265
	Ra	24.8453				2013	1	17	17	10.3	1.2	5.75	63.5	19.8455	14.4475	9.5786	1.323	1.42063
						2013	1	18	18	11.5	0.8	6.15	64	21.6041	18.4931	11.307	1.58826	1.8554
						2013	1	19	19	11.7	2.3	7	67	25.1296	18.8975	12.3274	1.79304	2.07013
						2013	1	20	20	14	4.1	9.05	67.5	18.9477	15.0066	9.53882	1.50213	1.99437
						2013	1	21	21	13.7	5	9.35	89.5	23.8072	16.5698	11.2354	1.78907	2.22117
						2013	1	22	22	14.1	6.6	10.35	74	32.3013	19.3808	14.1537	2.33678	2.71752
						2013	1	23	23	13.1	6.9	10	62	35.821	17.7672	14.271	2.32684	2.46229
						2013	1	24	24	14.2	6.1	10.15	74	27.8233	18.0295	12.6699	2.07693	2.51714
						2013	1	25	25	12.4	7.4	9.9	76.5	17.2222	6.88887	6.16159	1.00101	1.10667
						2013	1	26	26	14.3	5.1	9.7	76	6.84167	5.03547	3.32029	0.535521	0.867461
						2013	1	27	27	16.4	9.8	13.1	80.5	13.9652	7.37365	5.74038	1.04032	1.36768
						2013	1	28	28	13.6	5.4	9.5	90.5	33.2487	21.8111	15.2336	2.43911	2.87301
						2013	1	29	29	15.4	6.6	11	68.5	33.3699	23.4924	15.8386	2.67533	3.35523
						2013	1	30	30	10.7	2.1	6.4	75.5	22.7192	15.6308	10.6601	1.51302	1.6429
						2013	1	31	31	9.8	5.6	7.7	74	18.7628	6.30431	6.15238	0.920134	0.882697
						2013	2	1	32	12.7	4.3	8.5	83.5	33.5232	22.5276	15.5455	2.39788	2.76031
						2013	2	2	33	12.4	3.5	7.95	65	34.1915	24.3444	16.3205	2.46478	2.83867
						2013	2	3	34	9.5	4.9	7.2	65	47.7532	17.5732	16.3871	2.40276	1.97695
						2013	2	4	35	15.1	7.4	11.25	63	25.5059	15.7116	11.3242	1.92939	2.36507
						2013	2	5	36	15	7.1	11.05	66	14.6928	9.28584	6.6075	1.11802	1.49589
						2013	2	6	37	10.4	6.6	8.5	70.5	22.3944	6.8079	6.98475	1.07739	0.9977
						2013	2	7	38	8.6	6.8	7.7	81.5	43.9995	6.33592	9.44503	1.41258	0.886021
						2013	2	8	39	14.7	6.5	10.6	78	24.313	15.9494	11.1395	1.85546	2.31552
						2013	2	9	40	16.5	8.1	12.3	68	19.6175	13.1829	9.09709	1.60597	2.13318
						2013	2	10	41	17.5	7.9	12.7	73.5	27.891	21.4203	13.8267	2.47336	3.34151
						2013	2	11	42	11.9	6.4	9.15	85.5	38.1963	16.8064	14.3325	2.26542	2.21944
						2013	2	12	43	13.6	4.4	9	75.5	13.843	10.1884	6.71804	1.05596	1.42737
						2013	2	13	44	15.9	4	9.95	72	21.0244	20.0153	11.6043	1.88864	2.73281
						2013	2	14	45	15	4.9	9.95	68.5	16.1275	13.031	8.20066	1.33469	1.86937
						2013	2	15	46	15.4	6.5	10.95	58.5	34.3117	24.4299	16.3779	2.76162	3.46905
						2013	2	16	47	12.9	6.4	9.65	73	46.148	23.9969	18.8248	3.03068	3.16589
						2013	2	17	48	12.8	4.5	8.65	79.5	41.0493	27.2567	18.9219	2.93534	3.32741
						2013	2	18	49	9.4	3.9	6.65	74	49.6526	21.8472	18.6313	2.67172	2.27928
						2013	2	19	50	12.9	2.9	7.9	71	36.2325	28.986	18.3324	2.76325	3.32337
						2013	2	20	51	8.7	3.9	6.3	67.5	49.3493	18.9501	17.299	2.44515	1.92917
						2013	2	21	52	14.6	4.3	9.45	72.5	34.2406	28.2142	17.5825	2.81005	3.63093
						2013	2	22	53	13.6	4.7	9.15	73	36.6134	26.0688	17.4765	2.76237	3.30734
						2013	2	23	54	16	7.4	11.7	74.5	38.0604	26.1855	17.8584	3.08981	3.84103
						2013	2	24	55	17.8	7.6	12.7	72	27.0738	22.0922	13.8347	2.47478	3.43702
						2013	2	25	56	19.5	8.6	14.05	65.5	36.1716	31.5416	19.1074	3.56926	5.04243
						2013	2	26	57	19.3	6.9	13.1	60	29.771	29.5329	16.7735	3.03984	4.57012
						2013	2	27	58	19.1	7.5	13.3	62.5	25.5727	23.7315	13.9356	2.54187	3.7619
						2013	2	28	59	14.1	7.3	10.7	64.5	31.583	17.1811	13.1773	2.20262	2.48725
						2013	3	1	60	15.2	4.1	9.65	66.5	15.2088	13.5054	8.10729	1.30523	1.89264
						2013	3	2	61	15.6	4.8	10.2	72.5	19.3682	16.7341	10.184	1.67242	2.36197
						2013	3	3	62	14.9	5.5	10.2	65	3.94331	2.96537	1.93439	0.317666	0.634329
						2013	3	4	63	16.4	10.4	13.4	56	33.2081	15.9399	13.0149	2.38157	2.63719
						2013	3	5	64	15.4	4.3	9.85	76	37.9116	33.6655	20.2094	3.2773	4.39354
						2013	3	6	65	11.2	1.3	6.25	49	40.8513	32.3542	20.5657	2.90086	3.18537
						2013	3	7	66	15.2	0.8	8	43.5	29.7828	34.3097	18.0828	2.73624	4.28929
						2013	3	8	67	13.1	3.8	8.45	57.5	37.7799	28.1082	18.4341	2.83805	3.37332
						2013	3	9	68	16.6	4.7	10.65	54	30.5531	29.0866	16.8636	2.81384	4.01285
						2013	3	10	69	18.6	6.7	12.65	57.5	15.2622	14.5296	8.42383	1.5044	2.35709
						2013	3	11	70	20.6	7.9	14.25	60	8.79413	8.93484	5.01435	0.942564	1.66503
						2013	3	12	71	21.4	9.1	15.25	64	15.194	14.9509	8.52599	1.65266	2.66317
						2013	3	13	72	23.5	12	17.75	60	20.6461	18.9945	11.2023	2.33569	3.54251
						2013	3	14	73	24	9.9	16.95	63.5	23.7861	26.8307	14.2906	2.91256	4.7563
						2013	3	15	74	24.9	11.8	18.35	58.5	20.4382	21.4192	11.8358	2.50943	4.00996
						2013	3	16	75	21.3	13.9	17.6	37	26.8181	15.8763	11.6725	2.42346	3.5653
						2013	3	17	76	15.1	7.8	11.45	63	8.48449	4.95494	3.66781	0.629218	0.945407
						2013	3	18	77	14.2	4.4	9.3	64.5	37.871	29.6908	18.9688	3.01493	3.77054
						2013	3	19	78	15.4	3.5	9.45	63	43.7337	41.6345	24.1385	3.85784	5.23889
						2013	3	20	79	19.8	6.6	13.2	60	31.1359	32.8795	18.0996	3.29077	5.0743
						2013	3	21	80	22	9.1	15.55	59.5	32.478	33.5173	18.664	3.65063	5.61849
						2013	3	22	81	21	9.2	15.1	58.5	27.4172	25.8819	15.069	2.90769	4.35005
						2013	3	23	82	15.4	5.5	10.45	62.5	48.3374	38.2832	24.3344	4.03188	5.13906
						2013	3	24	83	14.8	3.1	8.95	62.5	44.6721	41.813	24.4483	3.83567	5.08597
						2013	3	25	84	18.8	4.6	11.7	59.5	39.9848	45.4228	24.1079	4.17109	6.45426
						2013	3	26	85	18.6	8.2	13.4	68.5	44.4428	36.9764	22.9318	4.19624	5.71415
						2013	3	27	86	16.5	9.3	12.9	58	45.3882	26.1436	19.4863	3.50862	4.04682
						2013	3	28	87	19.1	6.8	12.95	68.5	28.1025	27.6529	15.7695	2.84401	4.27201
						2013	3	29	88	22.6	8.2	15.4	62.5	35.9803	41.4492	21.8457	4.25375	6.83738
						2013	3	30	89	23	10.7	16.85	66.5	27.8973	27.451	15.6544	3.18131	4.84481
						2013	3	31	90	24.8	12	18.4	61	17.8654	18.2942	10.2267	2.17127	3.48118
						2013	4	1	91	26.3	14.7	20.5	60.5	25.9615	24.0922	14.1475	3.17794	4.68699
						2013	4	2	92	26.6	14	20.3	59	30.1376	30.3787	17.1165	3.82478	5.78826
						2013	4	3	93	24.5	11.7	18.1	48.5	46.4551	47.5701	26.5925	5.59914	8.5986
						2013	4	4	94	26.5	13	19.75	58.5	43.7212	47.2189	25.7027	5.66053	8.6876
						2013	4	5	95	24.6	11.8	18.2	66	45.9329	47.0353	26.2935	5.55161	8.34834
						2013	4	6	96	28.9	15.7	22.3	61.5	41.6691	44.0026	24.2226	5.69684	8.54258
						2013	4	7	97	31.1	16.9	24	57.5	41.2758	46.8893	24.8863	6.10104	9.34375
						2013	4	8	98	29.7	15.2	22.45	52	15.1622	17.5882	9.23778	2.18073	3.65689
						2013	4	9	99	23.1	10.9	17	49	32.8041	32.0168	18.3328	3.74176	5.69721
						2013	4	10	100	22.2	9.8	16	73	45.0448	44.6845	25.3791	5.03107	7.48392
						2013	4	11	101	21.3	9.1	15.2	71.5	48.0408	46.8878	26.8479	5.19627	7.64184
						2013	4	12	102	24.4	10.4	17.4	63.5	28.4987	31.9186	17.0612	3.52225	5.6618
						2013	4	13	103	25.8	13.4	19.6	59	15.0345	14.9142	8.47072	1.85806	2.98606
						2013	4	14	104	28.1	14.2	21.15	55	28.7786	32.0018	17.1671	3.92169	6.18321
						2013	4	15	105	25.3	13.6	19.45	60	30.6433	28.6822	16.7706	3.6639	5.3858
						2013	4	16	106	19.5	12.3	15.9	57.5	46.2591	26.6453	19.8602	3.92538	4.58369
						2013	4	17	107	19.7	9.4	14.55	66	48.1356	39.6638	24.7175	4.68973	6.37328
						2013	4	18	108	20.9	10.3	15.6	70	43.4669	36.8599	22.6429	4.43554	6.15562
						2013	4	19	109	21.2	11.1	16.15	70	52.9279	42.7657	26.9132	5.35887	7.20932
						2013	4	20	110	19.2	10.1	14.65	64.5	58.5518	42.6257	28.2606	5.37853	6.84912
						2013	4	21	111	20.4	9.4	14.9	63.5	43.5624	38.335	23.1168	4.43348	6.24491
						2013	4	22	112	20.3	10.8	15.55	77.5	53.0947	40.352	26.1838	5.1215	6.69694
						2013	4	23	113	22.1	7.9	15	61	43.9487	49.9258	26.4978	5.09744	8.06244
						2013	4	24	114	24.3	10.2	17.25	53.5	47.3728	53.4365	28.4616	5.85079	9.20707
						2013	4	25	115	25.5	10.4	17.95	56.5	47.5127	57.3954	29.5405	6.19388	10.0457
						2013	4	26	116	27.9	14	20.95	55.5	47.9665	53.3387	28.6131	6.50287	10.0134
						2013	4	27	117	30	15.4	22.7	53.5	37.0109	43.2288	22.627	5.37464	8.4591
						2013	4	28	118	31.7	16.1	23.9	53	21.6834	27.0609	13.7028	3.3513	5.55215
						2013	4	29	119	33.1	17.6	25.35	51	40.0148	49.6184	25.2062	6.37904	10.0706
						2013	4	30	120	34.3	19.7	27	47.5	36.9027	43.1024	22.5608	5.9279	9.32784
						2013	5	1	121	34.6	20.3	27.45	52	23.3105	26.6672	14.1039	3.74305	5.76465
						2013	5	2	122	33.8	20.8	27.3	51.5	18.6485	19.3944	10.7581	2.84564	4.2984
						2013	5	3	123	34.1	20	27.05	50	21.3553	24.0887	12.8302	3.37493	5.22049
						2013	5	4	124	32	19.3	25.65	51	38.5639	39.1809	21.9889	5.60352	8.07296
						2013	5	5	125	32.5	18.8	25.65	53	32.938	36.1	19.5064	4.9709	7.4703
						2013	5	6	126	33.1	18.4	25.75	54	41.1425	48.3835	25.2388	6.44652	9.88724
						2013	5	7	127	31.2	18.1	24.65	59	44.0692	46.1845	25.5206	6.35385	9.30365
						2013	5	8	128	31.3	16.5	23.9	44.5	41.1053	48.6686	25.3016	6.18803	10.4272
						2013	5	9	129	28.9	18.2	23.55	62	41.9481	35.9076	21.9545	5.32436	7.19588
						2013	5	10	130	28.6	16.6	22.6	66	50.5101	48.4897	27.9955	6.63343	9.4245
						2013	5	11	131	22.6	12.3	17.45	78.5	58.2	47.9568	29.8855	6.17858	8.34293
						2013	5	12	132	20.1	11.7	15.9	72	66.3628	44.5958	30.774	6.0825	7.44707
						2013	5	13	133	21.8	13.8	17.8	77.5	62.8001	40.1921	28.4201	5.93395	7.11319
						2013	5	14	134	21.3	12.1	16.7	72.5	55.069	40.5308	26.7252	5.40764	6.9605
						2013	5	15	135	23.6	11.8	17.7	69.5	53.6636	50.6584	29.4945	6.14097	8.85109
						2013	5	16	136	24.8	12.4	18.6	66.5	53.8555	53.4247	30.3432	6.47785	9.52672
						2013	5	17	137	28.8	15.6	22.2	61	50.4953	53.3231	29.3534	6.8863	10.2514
						2013	5	18	138	31.8	19	25.4	61	39.1751	40.1153	22.4252	5.68182	8.22586
						2013	5	19	139	29.4	17.1	23.25	59	40.5141	39.8659	22.7342	5.47344	7.9058
						2013	5	20	140	28.5	16.6	22.55	58.5	24.7893	23.5995	13.6823	3.23795	4.78248
						2013	5	21	141	28	17.3	22.65	71.5	56.8593	48.6716	29.7587	7.05993	9.46673
						2013	5	22	142	32.3	17.6	24.95	60.5	35.0782	41.2519	21.5187	5.39535	8.39119
						2013	5	23	143	35.2	20.6	27.9	54	31.4799	36.7686	19.2455	5.15839	7.83421
						2013	5	24	144	36.4	22	29.2	54	46.6988	53.797	28.3535	7.81579	11.4455
						2013	5	25	145	30.1	21.1	25.6	54.5	50.4281	36.3082	24.2055	6.16128	7.50562
						2013	5	26	146	32.1	19.4	25.75	55	44.1476	44.854	25.1727	6.42962	9.19584
						2013	5	27	147	32.9	20	26.45	52	54.274	56.0108	31.1894	8.09446	11.4933
						2013	5	28	148	32.1	19.9	26	51	53.9588	52.6638	30.1552	7.74648	10.7638
						2013	5	29	149	31.5	17.8	24.65	53.5	53.4079	58.535	31.629	7.87465	11.6839
						2013	5	30	150	33.9	19.4	26.65	49	50.8691	59.0081	30.9926	8.07975	12.2923
						2013	5	31	151	36.4	21.8	29.1	45	49.8056	58.173	30.4491	8.37559	13.2078
						2013	6	1	152	35	21.7	28.35	43.5	52.132	55.4685	30.4194	8.23361	12.7526
						2013	6	2	153	34.3	20.9	27.6	48.5	51.8056	55.5356	30.3424	8.07929	11.8218
						2013	6	3	154	35.9	20.8	28.35	41	49.43	59.7114	30.7326	8.31838	14.1401
						2013	6	4	155	33.9	21.4	27.65	40.5	52.2408	52.2408	29.5518	7.87747	12.4009
						2013	6	5	156	34.3	17.7	26	40	44.7757	59.4622	29.1888	7.49823	13.8289
						2013	6	6	157	32.1	17.3	24.7	40	49.3598	58.442	30.3825	7.57323	13.3427
						2013	6	7	158	30.9	19.4	25.15	41.5	56.3284	51.8221	30.563	7.69887	11.7401
						2013	6	8	159	31.4	19.8	25.6	42	56.3156	52.2608	30.6886	7.81151	11.838
						2013	6	9	160	34.4	18.1	26.25	39.5	45.4743	59.2985	29.3752	7.58917	13.9268
						2013	6	10	161	32.1	20.1	26.1	47	54.2532	52.0831	30.0702	7.74228	11.1216
						2013	6	11	162	31.7	18.8	25.25	46.5	52.2259	53.8972	30.0124	7.57778	11.4323
						2013	6	12	163	35.1	21.9	28.5	45	52.6374	55.5851	30.5986	8.30903	12.5507
						2013	6	13	164	35.2	21.2	28.2	34	50.1497	56.1677	30.0229	8.09987	14.4837
						2013	6	14	165	34.8	19.4	27.1	33.5	34.1283	42.046	21.4286	5.64299	10.8833
						2013	6	15	166	34.2	18	26.1	31.5	45.9929	59.6068	29.6188	7.62607	15.3556
						2013	6	16	167	35.4	18.3	26.85	34.5	46.4311	63.5178	30.7204	8.04483	15.938
						2013	6	17	168	35.9	24.8	30.35	31.5	55.721	49.4802	29.703	8.38812	13.5266
						2013	6	18	169	35.3	23.2	29.25	32	52.2065	50.5359	29.0561	8.01798	13.5568
						2013	6	19	170	35	22.9	28.95	34.5	50.2378	48.6301	27.9604	7.66642	12.6503
						2013	6	20	171	34.8	22.6	28.7	38	51.8123	50.5688	28.9556	7.89685	12.5588
						2013	6	21	172	34	22.2	28.1	35	43.9224	41.4628	24.1406	6.49873	10.6888
						2013	6	22	173	34.7	22.4	28.55	31	55.3686	54.4827	31.0696	8.44605	14.6177
						2013	6	23	174	37.1	23	30.05	26	51.7152	58.3348	31.0705	8.71962	16.7786
						2013	6	24	175	37.2	22.6	29.9	20	50.8891	59.4384	31.1115	8.70377	18.1453
						2013	6	25	176	37.1	25.2	31.15	23	56.1565	53.4609	30.9951	8.89844	16.1069
						2013	6	26	177	37.1	26.2	31.65	24	57.6138	50.2392	30.434	8.82661	15.0939
						2013	6	27	178	37.5	26.9	32.2	23	59.1822	50.1865	30.8293	9.04069	15.3199
						2013	6	28	179	37.8	26.6	32.2	24.5	56.9222	51.0023	30.4797	8.93817	15.3184
						2013	6	29	180	37.1	27.9	32.5	25.5	61.5457	45.2976	29.8684	8.81146	13.5691
						2013	6	30	181	37.2	26.5	31.85	22	59.3026	50.763	31.0374	9.038	15.5941
						2013	7	1	182	36.5	21.1	28.8	22	48.5987	59.8736	30.5144	8.33987	17.6826
						2013	7	2	183	34.9	24	29.45	30	55.1598	48.0994	29.1378	8.07469	13.2535
						2013	7	3	184	35.9	24.3	30.1	27.5	53.3106	49.4722	29.0511	8.16142	14.097
						2013	7	4	185	36.5	25.4	30.95	25.5	57.2888	50.8724	30.5387	8.73159	14.9293
						2013	7	5	186	36.5	26.6	31.55	22	59.0173	46.7417	29.711	8.59947	14.3639
						2013	7	6	187	37	27.5	32.25	20.5	59.2969	45.0656	29.2424	8.58392	14.1823
						2013	7	7	188	37.5	26.1	31.8	19	57.1507	52.1215	30.8741	8.9814	16.4762
						2013	7	8	189	37.9	25.9	31.9	18.5	55.6674	53.4407	30.854	8.99365	16.9778
						2013	7	9	190	36.5	28	32.25	18.5	65.2389	44.3624	30.4324	8.93322	14.2517
						2013	7	10	191	36.8	27.9	32.35	21.5	62.9718	44.8359	30.0581	8.84097	13.9851
						2013	7	11	192	37.5	28	32.75	21.5	61.0739	46.4161	30.1188	8.92948	14.5122
						2013	7	12	193	36.5	27.3	31.9	22	63.5395	46.7651	30.836	8.9884	14.4217
						2013	7	13	194	36.5	27.1	31.8	20	62.6312	47.0987	30.7238	8.93767	14.8016
						2013	7	14	195	36.5	28.1	32.3	20	65.1457	43.7779	30.2096	8.87669	13.8712
						2013	7	15	196	38.2	27.2	32.7	20	55.4174	48.7673	29.4078	8.71008	15.44
						2013	7	16	197	37.5	26.5	32	18.5	55.3519	48.7097	29.3731	8.5792	15.5469
						2013	7	17	198	36.7	23.3	30	19.5	50.413	54.0428	29.5267	8.27773	16.6554
						2013	7	18	199	36.8	22.7	29.75	25	48.9708	55.2391	29.4216	8.20513	16.0345
						2013	7	19	200	36.5	19.6	28.05	28.5	45.7076	61.7967	30.0643	8.08461	16.8677
						2013	7	20	201	36.7	26.1	31.4	27.5	55.0492	46.6817	28.6763	8.27479	13.5203
						2013	7	21	202	36.6	24.8	30.7	21	51.5618	48.6743	28.3393	8.06118	14.9513
						2013	7	22	203	36.5	27.3	31.9	22.5	58.2414	42.8656	28.2648	8.23891	13.2029
						2013	7	23	204	36.5	25.7	31.1	20	54.7847	47.334	28.8066	8.26168	14.7659
						2013	7	24	205	36.5	22.9	29.7	23.5	50.2673	54.6909	29.6603	8.26299	16.1229
						2013	7	25	206	36.5	27.9	32.2	21.5	61.729	42.4695	28.964	8.49369	13.2603
						2013	7	26	207	36.5	25	30.75	19.5	51.7361	47.5972	28.0713	7.99319	14.8638
						2013	7	27	208	36.5	24.5	30.5	20.5	49.9617	47.9632	27.6916	7.84445	14.7845
						2013	7	28	209	35	23.7	29.35	23	52.4956	47.456	28.2346	7.80785	14.0851
						2013	7	29	210	35	22.6	28.8	26.5	49.9436	49.5441	28.1392	7.69068	14.0582
						2013	7	30	211	35.1	22.1	28.6	23.5	48.0379	49.9594	27.7125	7.54157	14.591
						2013	7	31	212	36.5	22.2	29.35	24	45.3934	51.93	27.465	7.59504	15.1986
						2013	8	1	213	37.9	25.3	31.6	16.5	49.5029	49.8989	28.1149	8.14575	16.1591
						2013	8	2	214	37.9	25.5	31.7	17	48.4796	48.0918	27.3143	7.92982	15.5378
						2013	8	3	215	37.9	26.7	32.3	17.5	52.2133	46.7831	27.9583	8.21516	15.1495
						2013	8	4	216	37.9	25.2	31.55	22	46.4446	47.1877	26.4824	7.66499	14.495
						2013	8	5	217	37.9	22.7	30.3	24.5	44.1538	53.691	27.5429	7.77004	15.7797
						2013	8	6	218	37.9	25.5	31.7	23.5	47.6889	47.3074	26.8688	7.80049	14.3297
						2013	8	7	219	37.9	23.7	30.8	21	43.9335	49.9084	26.4886	7.55029	15.3311
						2013	8	8	220	37.9	27.5	32.7	21	49.5128	41.1946	25.5478	7.56682	13.0095
						2013	8	9	221	37.9	25.9	31.9	21.5	45.7751	43.9441	25.3711	7.39544	13.6583
						2013	8	10	222	37.9	27.4	32.65	24.5	51.9616	43.6478	26.94	7.97126	13.2545
						2013	8	11	223	37.9	27.1	32.5	20	49.581	42.838	26.0704	7.691	13.6135
						2013	8	12	224	37.9	25.1	31.5	21	45.4516	46.5424	26.018	7.52297	14.4438
						2013	8	13	225	37.9	24.3	31.1	21	41.7358	45.4086	24.6263	7.06277	14.0488
						2013	8	14	226	37.9	28.9	33.4	20.5	50.6749	36.4859	24.324	7.30419	11.7302
						2013	8	15	227	37.9	24.7	31.3	23	41.3335	43.6482	24.0275	6.91924	13.2824
						2013	8	16	228	37.9	24.7	31.3	20	42.4297	44.8058	24.6648	7.10275	14.0398
						2013	8	17	229	37.9	23.7	30.8	14.5	40.4189	45.9158	24.3696	6.94629	15.0833
						2013	8	18	230	38.2	22.8	30.5	21	40.8894	50.3757	25.6738	7.27287	15.4192
						2013	8	19	231	37.9	27.4	32.65	23.5	49.4517	41.5394	25.6387	7.58621	12.7759
						2013	8	20	232	37.9	26.3	32.1	22.5	46.7866	43.418	25.4959	7.46172	13.3918
						2013	8	21	233	37.9	24.9	31.4	24	43.2869	45.0183	24.9717	7.20578	13.5533
						2013	8	22	234	37.9	26.4	32.15	31	45.5805	41.934	24.7314	7.24522	11.8316
						2013	8	23	235	37.9	25.2	31.55	28	42.5241	43.2044	24.2469	7.01797	12.5077
						2013	8	24	236	35.8	21.2	28.5	23.5	39.3162	45.9213	24.0363	6.52705	13.4428
						2013	8	25	237	37.9	20.6	29.25	20.5	35.7809	49.5207	23.8119	6.57085	15.0328
						2013	8	26	238	37.9	24.9	31.4	19.5	38.2165	39.7452	22.0466	6.36174	12.6004
						2013	8	27	239	37.9	23.9	30.9	18.5	35.9451	40.2585	21.5191	6.1464	12.8149
						2013	8	28	240	37.9	26.4	32.15	19.5	44.2077	40.6711	23.9865	7.027	12.9771
						2013	8	29	241	37.9	24.1	31	22.5	37.119	40.9794	22.0626	6.31457	12.5326
						2013	8	30	242	37.9	25.2	31.55	20.5	40.606	41.2557	23.1533	6.70143	12.9453
						2013	8	31	243	35.3	22.5	28.9	21	41.5252	42.5218	23.7704	6.51062	12.876
						2013	9	1	244	36.3	24.1	30.2	28.5	42.9132	41.8833	23.9823	6.7515	11.9053
						2013	9	2	245	36.2	22.4	29.3	22.5	39.8536	43.9984	23.688	6.5436	13.1621
						2013	9	3	246	37.3	21.4	29.35	25.5	36.7802	46.7844	23.4656	6.48906	13.536
						2013	9	4	247	37.3	21.1	29.2	20.5	35.5648	46.092	22.9033	6.31341	14.026
						2013	9	5	248	30.1	21.1	25.6	23.5	47.2049	33.9876	22.6584	5.76748	9.72169
						2013	9	6	249	32.2	19.3	25.75	21	40.4722	41.7673	23.2579	5.94056	12.1504
						2013	9	7	250	32.5	19.2	25.85	25.5	40.8312	43.4444	23.8253	6.09945	12.0588
						2013	9	8	251	34	20.8	27.4	22.5	40.5714	42.8434	23.5845	6.25221	12.5378
						2013	9	9	252	34.2	19.6	26.9	18	38.6936	45.1942	23.6557	6.20171	13.7125
						2013	9	10	253	33.4	21.3	27.35	18.5	38.5929	37.3579	21.4793	5.68782	11.4514
						2013	9	11	254	35.1	21.5	28.3	17	33.7039	36.6698	19.887	5.37698	11.5553
						2013	9	12	255	37.3	23.7	30.5	17	35.8213	38.9736	21.1364	5.98751	12.5559
						2013	9	13	256	38.1	23.5	30.8	26.5	35.7528	41.7593	21.8578	6.23033	12.2102
						2013	9	14	257	37.3	22	29.65	25.5	34.7708	42.5595	21.7611	6.05599	12.4084
						2013	9	15	258	35.6	20.8	28.2	38.5	24.971	29.5657	15.3705	4.1468	7.45828
						2013	9	16	259	37.3	17.4	27.35	38.5	26.6701	42.4587	19.0358	5.04076	10.3839
						2013	9	17	260	32.7	18.4	25.55	49	32.5544	37.2423	19.6969	5.00789	7.79239
						2013	9	18	261	30.1	20.4	25.25	35.5	40.8922	31.7324	20.3773	5.14503	7.93999
						2013	9	19	262	37.3	18.3	27.8	40.5	30.9578	47.0558	21.5907	5.7743	11.2388
						2013	9	20	263	37.3	18.8	28.05	35	31.2742	46.2857	21.5224	5.7876	11.8651
						2013	9	21	264	31.6	19.5	25.55	25.5	35.6221	34.4822	19.8259	5.04068	9.64376
						2013	9	22	265	31.1	18.5	24.8	30.5	39.1324	39.4455	22.225	5.5529	10.2583
						2013	9	23	266	29.4	20.9	25.15	30	46.3547	31.5212	21.6233	5.44696	8.39155
						2013	9	24	267	28.4	17.6	23	22	41.2199	35.614	21.674	5.18642	9.90425
						2013	9	25	268	28.9	17.7	23.3	22.5	34.0942	30.5484	18.2562	4.40067	8.57342
						2013	9	26	269	30.3	19.6	24.95	33.5	37.8097	32.3651	19.7886	4.96157	8.24303
						2013	9	27	270	31.8	18.1	24.95	27	35.2251	38.6067	20.8609	5.23042	10.4679
						2013	9	28	271	31	17	24	23.5	34.866	39.0499	20.873	5.11717	10.8193
						2013	9	29	272	30.7	18.8	24.75	30	36.8988	35.1276	20.366	5.08245	9.23619
						2013	9	30	273	32.3	19.1	25.7	27.5	33.569	35.4488	19.5139	4.97854	9.71012
						2013	10	1	274	32	18.8	25.4	52.5	33.5826	35.4633	19.5219	4.94622	7.31917
						2013	10	2	275	28.6	18.7	23.65	31	35.2898	27.9495	17.7659	4.31896	7.24482
						2013	10	3	276	27.9	18	22.95	37	34.7051	27.4864	17.4715	4.17567	6.57443
						2013	10	4	277	24.4	15.3	19.85	40	26.1148	19.0116	12.6045	2.7833	4.2582
						2013	10	5	278	21.7	11.3	16.5	30.5	39.9238	33.2166	20.6	4.1441	7.3302
						2013	10	6	279	20.9	13.4	17.15	24	45.0464	27.0279	19.7384	4.046	6.60355
						2013	10	7	280	21.1	10.8	15.95	25	36.6574	30.2057	18.8235	3.72599	7.00216
						2013	10	8	281	22.6	11.4	17	23	31.9087	28.5902	17.0859	3.48726	7.00151
						2013	10	9	282	27.4	12.6	20	21	21.6869	25.6773	13.349	2.95943	6.95656
						2013	10	10	283	28.8	15.9	22.35	22	30.8634	31.8511	17.7361	4.1765	8.81459
						2013	10	11	284	31.4	15.5	23.45	21.5	24.7966	31.5413	15.8202	3.82739	8.94726
						2013	10	12	285	32.2	16.5	24.35	26	30.192	37.9212	19.1409	4.73181	10.3069
						2013	10	13	286	30.5	18.6	24.55	23	33.611	31.9977	18.5513	4.60783	9.08946
						2013	10	14	287	29.9	17	23.45	20.5	27.9745	28.8697	16.076	3.88928	8.32013
						2013	10	15	288	29.7	16.3	23	20.5	31.1128	33.3529	18.2227	4.36054	9.45281
						2013	10	16	289	17.9	17.8	17.85	44	371.85	2.9748	18.8143	3.93383	0.92628
						2013	10	17	290	28.1	15.1	21.6	37.5	32.4421	33.7398	18.7155	4.32479	7.72564
						2013	10	18	291	23.9	16.1	20	32	40.8566	25.4945	18.257	4.04752	6.1429
						2013	10	19	292	23.8	13.9	18.85	28.5	24.8361	19.6702	12.5032	2.6876	4.91022
						2013	10	20	293	22.9	13.6	18.25	26	35.7642	26.6086	17.4506	3.68963	6.55727
						2013	10	21	294	24.1	12.3	18.2	23.5	31.0556	29.3165	17.0687	3.60389	7.35773
						2013	10	22	295	25.9	12	18.95	34.5	28.7218	31.9386	17.1332	3.69287	7.1919
						2013	10	23	296	28.8	14	21.4	38.5	27.3545	32.3878	16.8376	3.8711	7.31599
						2013	10	24	297	26.1	15.9	21	47	28.0693	22.9046	14.3434	3.26401	4.71356
						2013	10	25	298	25.8	18	21.9	40	25.0692	15.6432	11.2023	2.60835	3.72871
						2013	10	26	299	25.6	14	19.8	31.5	29.8892	27.7372	16.2878	3.59186	6.65128
						2013	10	27	300	24.6	13.4	19	28.5	31.4325	28.1635	16.8309	3.63265	6.8507
						2013	10	28	301	25.9	14.1	20	28	8.71806	8.22985	4.7916	1.06228	2.40263
						2013	10	29	302	25.3	12.5	18.9	27	17.0433	17.4523	9.75613	2.09996	4.48729
						2013	10	30	303	26.2	13.8	20	29.5	24.2473	24.0533	13.6613	3.02868	5.98734
						2013	10	31	304	25.5	12.8	19.15	28.5	15.0835	15.3249	8.60052	1.86383	3.95715
						2013	11	1	305	26	12.6	19.3	30	21.2447	22.7743	12.4429	2.70748	5.57629
						2013	11	2	306	26.5	14	20.25	29.5	22.367	22.367	12.6527	2.82362	5.63095
						2013	11	3	307	24.8	12.8	18.8	22	12.5643	12.0617	6.96382	1.49485	3.41617
						2013	11	4	308	27	11.9	19.45	58	19.4009	23.4363	12.0623	2.63527	4.46766
						2013	11	5	309	19	12.2	15.6	85.5	24.2532	13.1937	10.1191	1.98225	2.41543
						2013	11	6	310	23.7	13.2	18.45	75	21.2661	17.8636	11.0256	2.34412	3.41179
						2013	11	7	311	23.5	14.7	19.1	79.5	25.929	18.254	12.3068	2.66343	3.53246
						2013	11	8	312	20.4	14	17.2	92	31.8154	16.2895	12.878	2.64352	3.04346
						2013	11	9	313	16.3	12.2	14.25	96	39.5327	12.9667	12.8076	2.40749	2.27395
						2013	11	10	314	16.8	11.9	14.35	71	40.2368	15.7728	14.2509	2.68714	2.70742
						2013	11	11	315	19.1	12.8	15.95	74.5	36.257	18.2735	14.5607	2.8822	3.25323
						2013	11	12	316	21.1	11.4	16.25	72	27.7637	21.5446	13.8351	2.76292	3.8099
						2013	11	13	317	22.7	10.6	16.65	71	21.1855	20.5075	11.791	2.38236	3.68522
						2013	11	14	318	23.5	10.7	17.1	71	19.3151	19.7787	11.0566	2.26316	3.6114
						2013	11	15	319	21	10.5	15.75	75	25.0287	21.0241	12.9764	2.55337	3.67007
						2013	11	16	320	20.9	11.1	16	67.5	24.8522	19.4841	12.448	2.46764	3.45186
						2013	11	17	321	20.4	10.2	15.3	71	23.8512	19.4626	12.1879	2.36606	3.37373
						2013	11	18	322	19.8	10.6	15.2	63	20.5259	15.107	9.96129	1.92796	2.68319
						2013	11	19	323	21	10.5	15.75	63.5	13.7774	11.573	7.14302	1.40554	2.16942
						2013	11	20	324	21.9	13.5	17.7	66.5	13.7386	9.23237	6.37094	1.32648	1.89987
						2013	11	21	325	20.3	9.6	14.95	72.5	17.7888	15.2273	9.31021	1.78829	2.67969
						2013	11	22	326	21.4	9.9	15.65	80.5	22.661	20.8481	12.2955	2.41219	3.63081
						2013	11	23	327	20.7	10.5	15.6	69	13.0412	10.6416	6.66403	1.30542	2.01209
						2013	11	24	328	18.4	10	14.2	75	26.2484	17.6389	12.172	2.28445	2.97421
						2013	11	25	329	16	11.2	13.6	86	25.5537	9.81263	8.95767	1.64965	1.7546
						2013	11	26	330	17.4	9.9	13.65	63.5	25.2561	15.1536	11.0667	2.04129	2.54682
						2013	11	27	331	17	11.6	14.3	67.5	27.3963	11.8352	10.1861	1.91771	2.10684
						2013	11	28	332	14.3	9.5	11.9	69	9.37512	3.60004	3.28638	0.572456	0.780319
						2013	11	29	333	15.4	8.7	12.05	71.5	7.21541	3.86746	2.98826	0.523156	0.822702
						2013	11	30	334	13.2	5.9	9.55	44	13.9306	8.13549	6.02216	0.966001	1.33879
						2013	12	1	335	15.2	4.7	9.95	72	35.1477	29.5241	18.2227	2.96581	3.90836
						2013	12	2	336	14.8	9.1	11.95	83	49.2527	22.4592	18.8143	3.28279	3.3745
						2013	12	3	337	16.3	7.8	12.05	84.5	40.121	27.2823	18.7155	3.27652	4.05619
						2013	12	4	338	9.4	4.9	7.15	74.5	53.7902	19.3645	18.257	2.67158	2.1469
						2013	12	5	339	9.1	4.9	7	54	38.1309	12.812	12.5032	1.81862	1.46988
						2013	12	6	340	15	3.1	9.05	58	31.6167	30.0991	17.4506	2.74803	3.75495
						2013	12	7	341	10.3	3.4	6.85	75.5	40.6122	22.4179	17.0687	2.46766	2.38181
						2013	12	8	342	11.8	1.9	6.85	89	34.0331	26.9542	17.1332	2.47699	2.82267
						2013	12	9	343	4.6	-0.4	2.1	88.5	47.0625	18.825	16.8376	1.96518	0.796238
						2013	12	10	344	6.1	-2.5	1.8	93.5	30.5691	21.0316	14.3434	1.64883	0.767966
						2013	12	11	345	2.7	-0.9	0.9	86	36.9009	10.6275	11.2023	1.22862	0.223155
						2013	12	12	346	4.3	-0.5	1.9	89	46.4647	17.8424	16.2878	1.88191	0.694687
						2013	12	13	347	1.4	-2.4	-0.5	94	53.9629	16.4047	16.8309	1.70774	-0.197702
						2013	12	14	348	8.6	0.9	4.75	94	10.7923	6.64808	4.7916	0.633717	0.651485
						2013	12	15	349	9.6	-0.9	4.35	91.5	18.8175	15.8067	9.75613	1.26742	1.24722
						2013	12	16	350	8.8	-0.3	4.25	91	28.3043	20.6055	13.6613	1.76673	1.55332
						2013	12	17	351	11.6	0.6	6.1	91.5	16.2072	14.2623	8.60052	1.20556	1.46551
						2013	12	18	352	10.9	0.8	5.85	82	24.4704	19.7721	12.4429	1.72592	1.90153
						2013	12	19	353	11.9	0.8	6.35	75.5	23.7357	21.0773	12.6527	1.79212	2.13606
						2013	12	20	354	12.4	1.3	6.85	82	13.0637	11.6006	6.96382	1.00677	1.33052
						2013	12	21	355	13.6	0.9	7.25	79.5	21.1548	21.4933	12.0623	1.77218	2.38218
						2013	12	22	356	16.9	4.8	10.85	77	18.1816	17.5997	10.1191	1.70034	2.56195
						2013	12	23	357	15.9	4	9.95	84	19.9761	19.0172	11.0256	1.79446	2.60943
						2013	12	24	358	15	3.1	9.05	89	22.2974	21.2271	12.3068	1.93802	2.72
						2013	12	25	359	12.2	2.1	7.15	82	25.326	20.4634	12.878	1.88445	2.25687
						2013	12	26	360	12	3.3	7.65	93	27.1387	18.8885	12.8076	1.91172	2.19649
						2013	12	27	361	15.1	4.6	9.85	77	27.487	23.0891	14.2509	2.31102	3.09393
						2013	12	28	362	14.9	4.2	9.55	84	27.8209	23.8147	14.5607	2.33565	3.12386
						2013	12	29	363	11.7	4.9	8.3	89	33.1595	18.0388	13.8351	2.11783	2.2228
						2013	12	30	364	6.7	5.2	5.95	82	60.1707	7.22049	11.791	1.64241	0.819723
						2013	12	31	365	11.5	5.8	8.65	93	28.9444	13.1986	11.0566	1.7152	1.73347
																	1553	2597.84
																	ETo-HS	ETo-TURC (Ousman Couly (2016)

## Sheet: 2014
	DİYARBAKIR					year	month	day	DOY	Tmax	Tmin	Tmean	RHmean.	Ra	Rs=0.16(Tmax-Tmin)^0.5*Ra	Rs=from meteorological station	ETo-HS	ETo-TURC (Ousman Couly (2016)
	DOY	246					#	#		°C	°C	°C	%	MJ m-2 day-1*(0.408 mm day-1)
	φ (-)	37.89	0.661305			2014	1	1	1	13.8	7.1	10.45	82.5	18.8377	10.097	7.80164	1.29262	1.55127
	tan(φ)		0.778198			2014	1	2	2	11.9	4.8	8.35	88	3.03075	1.72146	1.29211	0.19817	0.422526
	sin(φ)		0.614147			2014	1	3	3	13	6.2	9.6	85	4.24993	2.31196	1.77319	0.284954	0.53253
	cos(φ)		0.789191			2014	1	4	4	12	4.1	8.05	97.5	6.73516	4.25662	3.02888	0.459209	0.687115
	dr	0.984766		(1+0.033*cos(2*3.14/365*DOY))		2014	1	5	5	11.7	2.9	7.3	97.5	12.4912	8.79382	5.92879	0.872786	1.10449
	δ	0.120494		(0.409*sin(2*3.14/365*DOY-1.39))		2014	1	6	6	12.8	2.6	7.7	83.5	9.75466	7.95981	4.98462	0.745488	1.05678
	tan(δ)	0.121081				2014	1	7	7	17.3	3.8	10.55	63	4.53829	4.90135	2.66796	0.443608	0.89492
	sin(δ)	0.120203				2014	1	8	8	17.1	4.3	10.7	63	21.731	22.2526	12.4396	2.07931	3.1418
	cos(δ)	0.992749				2014	1	9	9	13.1	2.4	7.75	69	23.4849	20.103	12.2914	1.84187	2.34368
	X	0.991122				2014	1	10	10	15.2	3.3	9.25	69	16.5245	15.7313	9.12054	1.44696	2.10732		-
	ωs (eq. 25)	1.49064		(acos{(-1*tan(-0.35)*tan(0.409*sin(2*3.14/365*DOY-1.39))))		2014	1	11	11	14.8	3.3	9.05	64	21.0613	19.3764	11.4276	1.79956	2.50412
	sin ωs	0.996789				2014	1	12	12	13.5	2.7	8.1	62.5	10.4871	9.06088	5.51428	0.837638	1.21212
	sin φ*sin δ	-0.0738224		(sin(0.35)*sin(0.409*sin(2*3.14/365*DOY-1.39)))		2014	1	13	13	8.4	5.4	6.9	84.5	40.2627	9.66306	11.1579	1.6164	1.14794
	cos φ*cos δ	0.783469		(cos(0.35)*cos(0.409*sin(2*3.14/365*DOY-1.39))		2014	1	14	14	9.7	4.8	7.25	82.5	13.9439	5.46599	4.93857	0.725566	0.76324
	Gsc	0.082				2014	1	15	15	12.7	6	9.35	88	25.3545	13.59	10.5006	1.67206	1.86647
						2014	1	16	16	12.2	4.6	8.4	81.5	2.88759	1.75565	1.27369	0.195718	0.427952
	Ra	24.8453				2014	1	17	17	13.6	6	9.8	88.5	11.9073	7.23962	5.25217	0.85019	1.14288
						2014	1	18	18	18	6.5	12.25	62.5	7.97834	7.34007	4.32894	0.762946	1.31415
						2014	1	19	19	15.5	6.4	10.95	61.5	9.13289	6.64874	4.40807	0.743284	1.14311
						2014	1	20	20	15.8	5.4	10.6	64.5	33.3631	27.7581	17.2149	2.86741	3.83129
						2014	1	21	21	12	5.4	8.7	67.5	41.6217	21.9763	17.1085	2.65905	2.73868
						2014	1	22	22	12.6	6.2	9.4	85	32.7412	16.7635	13.2527	2.11418	2.2516
						2014	1	23	23	12.5	8.1	10.3	77	37.4962	13.1987	12.5844	2.074	1.92952
						2014	1	24	24	17.6	5.5	11.55	87	13.6038	13.1685	7.57135	1.30332	2.05774
						2014	1	25	25	13	3.7	8.35	86.5	35.8878	26.7005	17.5109	2.68564	3.19161
						2014	1	26	26	10.8	7.3	9.05	80.5	64.2207	17.9818	19.2234	3.0272	2.34143
						2014	1	27	27	9.5	6.8	8.15	73.5	24.9223	5.38321	6.55224	0.997229	0.815597
						2014	1	28	28	15.7	8.8	12.25	81.5	43.7862	24.17	18.4027	3.24335	3.65953
						2014	1	29	29	13.7	7.8	10.75	75.5	25.3651	11.9723	9.85787	1.65066	1.81991
						2014	1	30	30	15.9	7.2	11.55	64	34.2461	23.8353	16.1618	2.78206	3.49625
						2014	1	31	31	14.3	4.2	9.25	64	37.5752	30.3608	19.1065	3.03122	3.83722
						2014	2	1	32	12.9	3.6	8.25	60	46.373	34.5015	22.627	3.45702	4.02506
						2014	2	2	33	10.9	2.7	6.8	37.5	20.0051	13.1234	9.16576	1.32243	1.73379
						2014	2	3	34	8.3	-1	3.65	39	41.5109	30.8841	20.2546	2.54812	2.31492
						2014	2	4	35	7.7	-1.1	3.3	51.5	31.8288	22.4075	15.1071	1.86953	1.36945
						2014	2	5	36	13.2	0	6.6	46.5	33.991	35.8945	19.7593	2.82767	3.77788
						2014	2	6	37	12.6	0.3	6.45	45	26.0379	25.6213	14.611	2.07806	2.76767
						2014	2	7	38	14.3	2	8.15	50.5	14.1218	13.8958	7.92432	1.20606	1.74463
						2014	2	8	39	16.1	3.2	9.65	53.5	42.7418	44.1095	24.5622	3.95437	5.60673
						2014	2	9	40	16.8	3.2	10	48	30.7129	33.4156	18.1222	2.95477	4.52849
						2014	2	10	41	15.8	3.1	9.45	44.5	22.1601	22.5147	12.6355	2.01943	3.17966
						2014	2	11	42	16.6	6.1	11.35	51.5	33.0989	27.8031	17.1604	2.93383	3.9916
						2014	2	12	43	18.6	6.1	12.35	52	19.3323	19.3323	10.936	1.93381	2.99874
						2014	2	13	44	18.7	6	12.35	48	15.7576	16.0097	8.98488	1.58879	2.60602
						2014	2	14	45	18	5.6	11.8	47	16.6769	16.5434	9.39605	1.63119	2.65233
						2014	2	15	46	10.1	5.3	7.7	62	56.9721	21.8773	19.9712	2.98684	2.52026
						2014	2	16	47	13.8	5.6	9.7	80	35.2235	23.1066	16.1384	2.60292	3.06746
						2014	2	17	48	17.5	6.7	12.1	64.5	38.898	33.6078	20.4531	3.58672	4.94105
						2014	2	18	49	21.1	6.3	13.7	60	30.387	35.9782	18.7042	3.45555	5.6333
						2014	2	19	50	22.1	9.1	15.6	62.5	35.9578	37.3962	20.7437	4.0635	6.24036
						2014	2	20	51	21.8	8.2	15	57	13.6846	14.8889	8.07463	1.55333	2.63173
						2014	2	21	52	20.8	7.7	14.25	58	36.7957	38.5619	21.3085	4.00542	6.13948
						2014	2	22	53	21.1	8.4	14.75	58	40.8674	41.5213	23.3023	4.44855	6.70295
						2014	2	23	54	21.8	9.3	15.55	50	38.4138	38.4138	21.7301	4.25036	6.39111
						2014	2	24	55	21	8.3	14.65	48	33.7006	34.2398	19.2158	3.65714	5.72363
						2014	2	25	56	14.6	9.4	12	37	52.5968	21.8803	19.1903	3.35402	3.91591
						2014	2	26	57	14.9	7.3	11.1	59	48.2319	29.325	21.2746	3.60601	4.14172
						2014	2	27	58	16.7	6.8	11.75	85	34.3899	27.2368	17.3128	3.0005	3.99337
						2014	2	28	59	16.7	5.4	11.05	69.5	41.5518	37.5628	22.3485	3.78149	5.21423
						2014	3	1	60	16.7	7.4	12.05	69.5	50.9939	37.9394	24.8817	4.35604	5.52791
						2014	3	2	61	16.9	8.9	12.9	65	50.9751	32.6241	23.0687	4.15365	4.97568
						2014	3	3	62	16.2	8.3	12.25	73.5	26.5924	16.8064	11.9589	2.10768	2.63336
						2014	3	4	63	18.5	9.6	14.05	70.5	43.7554	31.1539	20.8856	3.90143	4.98429
						2014	3	5	64	18.5	7.2	12.85	75.5	32.8664	29.7112	17.6771	3.17767	4.54866
						2014	3	6	65	21.1	10.4	15.75	69	30.8793	26.4327	16.1614	3.18009	4.52884
						2014	3	7	66	21.8	8.4	15.1	56	26.6134	28.5296	15.5874	3.00771	4.7618
						2014	3	8	67	23.8	11.9	17.85	58	45.3746	43.1966	25.0441	5.23641	7.62841
						2014	3	9	68	23.8	13.6	18.7	59.5	49.5722	40.4509	25.3313	5.42275	7.3178
						2014	3	10	69	17.9	10.7	14.3	67.5	64.9274	37.3982	27.875	5.24792	5.97444
						2014	3	11	70	17.9	7.3	12.6	63	53.1234	45.0486	27.6731	4.93401	6.67114
						2014	3	12	71	16.8	7.2	12	70.5	56.8495	43.6604	28.1827	4.92569	6.30339
						2014	3	13	72	13.3	7.4	10.35	72.5	67.4432	31.8332	26.211	4.32744	4.29359
						2014	3	14	73	11.8	6.8	9.3	75	59.1389	23.6555	21.1582	3.36291	3.0545
						2014	3	15	74	19.8	6.4	13.1	65.5	33.805	36.239	19.7995	3.58823	5.53929
						2014	3	16	75	18	5.1	11.55	60	44.0525	45.4622	25.3154	4.35774	6.41283
						2014	3	17	76	15.1	9.1	12.1	73	51.5151	24.7272	20.1897	3.54054	3.71186
						2014	3	18	77	18.8	10.2	14.5	86.5	38.8233	26.7105	18.2164	3.4509	4.38841
						2014	3	19	78	20.4	9.3	14.85	68.5	42.0046	37.3001	22.3912	4.28775	6.07478
						2014	3	20	79	22.7	9.3	16	57.5	32.1844	34.5017	18.8503	3.73683	5.85467
						2014	3	21	80	22	11.7	16.85	61.5	42.4075	34.9438	21.7762	4.4254	6.07366
						2014	3	22	81	24.1	10.5	17.3	51.5	14.9307	16.2446	8.80987	1.81361	3.04422
						2014	3	23	82	24.7	10.2	17.45	55.5	20.0086	23.2099	12.1905	2.52027	4.21756
						2014	3	24	83	24.1	11.4	17.75	52.5	33.9825	34.5262	19.3766	4.04004	6.15209
						2014	3	25	84	24.7	12.2	18.45	52	30.6391	30.6391	17.3321	3.68491	5.59623
						2014	3	26	85	23.3	12.2	17.75	52.5	39.6922	35.2467	21.1586	4.41158	6.27313
						2014	3	27	86	24.1	10.4	17.25	54	34.7373	38.0721	20.572	4.22895	6.65943
						2014	3	28	87	24.6	10.9	17.75	54	47.3687	51.916	28.0525	5.84896	9.07384
						2014	3	29	88	23	11.9	17.45	50	53.18	47.2239	28.3485	5.8608	8.22075
						2014	3	30	89	16.5	4.3	10.4	71	40.8701	39.8892	22.8405	3.77766	5.32839
						2014	3	31	90	15.2	2.2	8.7	47.5	41.066	42.7086	23.6905	3.68203	5.28004
						2014	4	1	91	16.9	3.6	10.25	50.5	37.6897	40.1019	21.9922	3.61801	5.30949
						2014	4	2	92	21.9	6.7	14.3	53	49.7027	60.4385	31.0043	5.83707	9.46038
						2014	4	3	93	23	11.4	17.2	52	41.618	38.6215	22.6793	4.65549	6.74141
						2014	4	4	94	22.8	11.6	17.2	47	53.8703	48.2678	28.8455	5.92126	8.69612
						2014	4	5	95	25.4	11.4	18.4	47.5	47.0339	52.678	28.1576	5.97822	9.68724
						2014	4	6	96	27	11.7	19.35	43	48.6061	59.4939	30.4198	6.62801	11.8298
						2014	4	7	97	26.7	15.4	21.05	34	53.267	48.1534	28.6495	6.52795	11.1735
						2014	4	8	98	24.3	12.5	18.4	27	54.8604	51.7882	30.1523	6.40172	12.2245
						2014	4	9	99	23.2	8.7	15.95	59.5	49.5338	57.4592	30.1791	5.97376	9.51344
						2014	4	10	100	22.8	9.9	16.35	69.5	53.1068	54.8062	30.5186	6.11257	9.19868
						2014	4	11	101	23.6	9.3	16.45	57	47.9365	54.8394	29.0038	5.82617	9.23088
						2014	4	12	102	26.1	11.3	18.7	56.5	45.9111	54.3587	28.2597	6.04963	9.71018
						2014	4	13	103	21.7	12.6	17.15	70	58.4061	42.5196	28.1902	5.77848	7.37689
						2014	4	14	104	23.7	11.6	17.65	61.5	48.7542	47.1941	27.1347	5.64169	8.25905
						2014	4	15	105	18.1	11.4	14.75	62.5	69.567	37.2879	28.8112	5.50022	6.05229
						2014	4	16	106	19.3	12.5	15.9	66	70.0812	38.1242	29.2399	5.77928	6.41475
						2014	4	17	107	22.1	12.7	17.4	69	60.3975	45.4189	29.628	6.11665	7.90936
						2014	4	18	108	27.2	16	21.6	61.5	54.8164	49.1155	29.3521	6.78272	9.36809
						2014	4	19	109	29.3	15.5	22.4	59	50.7577	56.0364	30.169	7.11304	10.7922
						2014	4	20	110	21.9	14.7	18.3	70.5	70.539	40.6305	30.2842	6.41196	7.27787
						2014	4	21	111	26.3	13.3	19.8	72.5	51.9267	54.0038	29.9559	6.60599	9.89378
						2014	4	22	112	25.8	14.1	19.95	62.5	54.1181	50.6546	29.618	6.55754	9.3333
						2014	4	23	113	29	15.5	22.25	56	49.4639	53.421	29.0787	6.83039	10.2789
						2014	4	24	114	29.8	16.9	23.35	56	48.6383	50.1947	27.9507	6.74576	9.86866
						2014	4	25	115	27.7	17.1	22.4	57.5	57.1623	48.4736	29.7771	7.02064	9.38807
						2014	4	26	116	30.8	16.7	23.75	45	51.5438	58.1414	30.9675	7.54649	12.2614
						2014	4	27	117	27.7	12.6	20.15	50	48.3741	58.4359	30.0761	6.69423	10.756
						2014	4	28	118	30.4	15	22.7	58	46.6702	57.4977	29.3036	6.96055	11.1225
						2014	4	29	119	26.2	13.9	20.05	57	51.417	50.5943	28.8522	6.40491	9.34263
						2014	4	30	120	26.5	12.3	19.4	54	48.2133	54.7704	29.0691	6.34223	9.94064
						2014	5	1	121	27.6	14.7	21.15	51.5	50.9552	52.5858	29.2822	6.68928	9.91651
						2014	5	2	122	27.1	12.4	19.75	49.5	48.3098	56.8123	29.6356	6.52667	10.4519
						2014	5	3	123	28.3	12.6	20.45	49.5	46.8186	58.8041	29.6816	6.65867	10.9674
						2014	5	4	124	31.3	14.5	22.9	51	44.9924	60.4697	29.5062	7.04329	11.718
						2014	5	5	125	34.6	17.5	26.05	48	44.3985	60.7372	29.3756	7.55482	12.7127
						2014	5	6	126	32.1	22	27.05	45.5	58.3682	47.1615	29.6795	7.80706	10.453
						2014	5	7	127	28.1	17.9	23	49.5	58.3805	47.6385	29.8324	7.13865	9.39728
						2014	5	8	128	32.9	20.1	26.5	44.5	51.1385	52.3659	29.2734	7.6058	11.6266
						2014	5	9	129	26	16.4	21.2	55.5	54.5953	41.9292	27.0652	6.19076	7.99155
						2014	5	10	130	27.9	14.1	21	62	50.3089	55.5411	29.9023	6.80463	10.4216
						2014	5	11	131	29.6	16.5	23.05	50.5	49.6032	51.9841	28.7253	6.88217	10.1547
						2014	5	12	132	27.6	16.2	21.9	55	52.6361	48.0041	28.4352	6.62086	9.2165
						2014	5	13	133	29	17	23	61.5	50.6106	48.5861	28.0512	6.71243	9.50845
						2014	5	14	134	28.6	15.2	21.9	60.5	49.706	53.2849	29.1126	6.7786	10.1881
						2014	5	15	135	32.3	16.3	24.3	58	45.4617	58.1909	29.0955	7.18415	11.5546
						2014	5	16	136	34.1	19.5	26.8	51	46.6066	54.4365	28.4934	7.45327	11.235
						2014	5	17	137	34.3	19.4	26.85	47	45.8523	54.656	28.3188	7.4159	11.7698
						2014	5	18	138	30.6	16.3	23.45	42.5	47.8189	54.7048	28.9326	6.9997	11.8883
						2014	5	19	139	28.8	17.2	23	48.5	50.815	47.1563	27.6911	6.62627	9.43817
						2014	5	20	140	28.5	15.1	21.8	56.5	48.8289	52.3446	28.5989	6.64221	9.99643
						2014	5	21	141	30.8	17.8	24.3	53.5	49.5425	51.5242	28.5805	7.05699	10.2767
						2014	5	22	142	28.9	17.8	23.35	52	53.0819	47.1367	28.2962	6.82913	9.29146
						2014	5	23	143	31.6	17.6	24.6	53.5	47.2927	52.9678	28.3125	7.04064	10.6028
						2014	5	24	144	28.4	17.4	22.9	59	50.4293	44.3778	26.7608	6.38795	8.70381
						2014	5	25	145	30.7	16.4	23.55	54	48.1033	55.0302	29.1047	7.0584	10.8173
						2014	5	26	146	32.1	18.7	25.4	51	48.7073	52.2143	28.5277	7.22801	10.584
						2014	5	27	147	31.5	18.3	24.9	50	49.3465	52.1099	28.6856	7.18388	10.4854
						2014	5	28	148	33.1	20.6	26.85	51	50.6872	50.6872	28.673	7.50866	10.4968
						2014	5	29	149	34.7	22	28.35	47.5	49.9634	50.7628	28.4888	7.71105	11.0977
						2014	5	30	150	36.1	20.2	28.15	38	45.3137	57.639	28.91	7.79115	14.1501
						2014	5	31	151	37.4	21.5	29.45	37	45.9463	58.4437	29.3136	8.12342	14.7419
						2014	6	1	152	31.1	18.4	24.75	29.5	51.0604	51.8774	29.1143	7.26564	13.4673
						2014	6	2	153	28.2	16.5	22.35	36.5	51.0197	47.7544	27.9223	6.57513	11.0294
						2014	6	3	154	29.7	17.8	23.75	51.5	52.3976	49.8825	28.9204	7.04765	9.87478
						2014	6	4	155	31.7	18.1	24.9	53.5	49.2008	53.5305	29.031	7.27039	10.7603
						2014	6	5	156	27.6	17.1	22.35	57.5	56.153	47.1685	29.113	6.85553	9.13756
						2014	6	6	157	28.7	15.3	22	54.5	49.0305	52.5607	28.717	6.70331	10.0734
						2014	6	7	158	29.1	16.2	22.65	52	49.0077	50.576	28.163	6.68137	9.82189
						2014	6	8	159	32.1	18.8	25.45	46.5	49.833	53.0223	29.0779	7.37593	11.2867
						2014	6	9	160	34.9	20.8	27.85	39	47.7749	53.8901	28.7031	7.6849	13.0514
						2014	6	10	161	36.4	20.9	28.65	34.5	46.5759	57.7542	29.3391	7.99284	14.8728
						2014	6	11	162	35.7	20.9	28.3	35	45.8315	54.2645	28.2107	7.62752	13.8647
						2014	6	12	163	31.5	20.8	26.15	34.5	52.8121	45.2072	27.6405	7.1248	11.3806
						2014	6	13	164	31.5	19.7	25.6	39	50.9295	48.0774	27.9918	7.12505	11.3471
						2014	6	14	165	34.8	20	27.4	34	45.2349	53.5581	27.8435	7.38127	13.6961
						2014	6	15	166	36.3	22.3	29.3	28.5	46.0471	51.5727	27.5668	7.61509	14.3821
						2014	6	16	167	36.1	21.5	28.8	27	44.7129	52.2247	27.3357	7.47108	14.709
						2014	6	17	168	36.9	19.8	28.35	25.5	40.8876	55.9342	27.0526	7.32233	15.8807
						2014	6	18	169	36.2	26.5	31.35	27.5	51.9916	40.3455	25.9083	7.46845	11.7577
						2014	6	19	170	36	26.6	31.3	27	53.9611	40.5787	26.4706	7.62279	11.8801
						2014	6	20	171	36	25.5	30.75	23.5	50.6954	42.5841	26.2835	7.48411	12.8322
						2014	6	21	172	33.8	21.9	27.85	22	48.7245	46.3857	26.8931	7.20028	13.6738
						2014	6	22	173	35.3	18.7	27	26	40.5842	53.8958	26.4564	6.95147	14.9825
						2014	6	23	174	35.7	24.9	30.3	25	49.9632	43.1682	26.2713	7.41131	12.7359
						2014	6	24	175	36.4	24.4	30.4	22.5	47.6312	45.7259	26.3999	7.46306	13.8248
						2014	6	25	176	36.6	23.9	30.25	22	39.2733	39.9016	22.3933	6.31074	12.1831
						2014	6	26	177	36	26.2	31.1	22.5	51.4348	40.3249	25.7626	7.38868	12.3551
						2014	6	27	178	36.1	25.7	30.9	19.5	49.8755	41.4964	25.735	7.35057	13.0595
						2014	6	28	179	36	27.1	31.55	23	54.1088	38.5254	25.8275	7.47546	11.8251
						2014	6	29	180	36	26.7	31.35	21.5	52.1832	38.8243	25.462	7.33979	12.0715
						2014	6	30	181	36.4	23.9	30.15	17.5	45.9087	45.9087	25.9699	7.30342	14.5494
						2014	7	1	182	38.6	25.4	32	15	44.0165	46.4814	25.5872	7.47343	15.3775
						2014	7	2	183	38.6	23.9	31.25	18	41.0831	48.3137	25.2024	7.25018	15.3838
						2014	7	3	184	38.6	29.9	34.25	18	54.673	38.0524	25.802	7.87665	12.6102
						2014	7	4	185	38.6	28.8	33.7	22.5	47.9757	37.6129	24.03	7.25821	11.8629
						2014	7	5	186	38.6	26.4	32.5	28.5	41.4485	40.4537	23.1637	6.83352	11.7953
						2014	7	6	187	38.6	25.5	32.05	33.5	42.2074	44.2334	24.4424	7.14625	12.0878
						2014	7	7	188	38.6	27.1	32.85	26	47.0498	43.2858	25.5286	7.58357	12.9679
						2014	7	8	189	38.6	27	32.8	22	45.4604	42.1873	24.7732	7.35192	13.1861
						2014	7	9	190	38.6	25.7	32.15	21	38.8139	40.0559	22.305	6.5344	12.5995
						2014	7	10	191	38.6	26.3	32.45	18.5	47.4735	46.7139	26.6394	7.85105	15.0025
						2014	7	11	192	38.6	26.5	32.55	18	45.5931	44.1341	25.3753	7.4934	14.2933
						2014	7	12	193	38.6	28.5	33.55	17	48.1166	38.8782	24.4667	7.36859	12.9137
						2014	7	13	194	38.6	23.8	31.2	16	39.4326	46.6882	24.272	6.97542	15.1717
						2014	7	14	195	38.6	22.4	30.5	22	37.4107	48.4842	24.092	6.82477	14.7132
						2014	7	15	196	38.6	24.4	31.5	15.5	41.9897	47.7003	25.3167	7.32018	15.6093
						2014	7	16	197	38.6	23.3	30.95	19.5	38.89	47.6013	24.339	6.95899	14.8965
						2014	7	17	198	38.6	23	30.8	19.5	37.3885	46.6609	23.6277	6.7348	14.5914
						2014	7	18	199	38.6	20.3	29.45	19.5	33.7991	49.4819	23.134	6.41093	15.2075
						2014	7	19	200	38.6	21.9	30.25	17.5	35.7078	47.7056	23.3475	6.57965	15.1107
						2014	7	20	201	35.7	21.3	28.5	26	37.3512	43.0286	22.678	6.15821	12.3056
						2014	7	21	202	35.8	25.8	30.8	49	37.4812	29.985	18.9642	5.40553	6.78225
						2014	7	22	203	38.6	24.7	31.65	50	25.9352	28.84	15.471	4.48696	6.50524
						2014	7	23	204	38.6	26.4	32.5	35.5	39.7613	38.807	22.2208	6.55536	10.4713
						2014	7	24	205	38.6	26.9	32.75	25.5	37.1233	34.7474	20.317	6.0235	10.5736
						2014	7	25	206	38.6	23.8	31.2	19.5	35.0275	41.4725	21.5605	6.19618	13.0935
						2014	7	26	207	38.6	21	29.8	20.5	30.6098	43.0986	20.5464	5.73603	13.2451
						2014	7	27	208	35.5	21.5	28.5	25.5	36.6634	41.063	21.9491	5.96026	11.8321
						2014	7	28	209	38.6	24.8	31.7	23.5	36.578	40.3821	21.741	6.31179	12.3208
						2014	7	29	210	38.6	27.6	33.1	20.5	38.8662	34.2023	20.6247	6.15707	11.0048
						2014	7	30	211	38.6	27.6	33.1	18.5	38.3597	33.7565	20.3559	6.07683	11.0882
						2014	7	31	212	38.6	30	34.3	15	43.4564	29.898	20.3903	6.23058	10.3487
						2014	8	1	213	37.3	28.8	33.05	17	20.9011	14.2127	9.74985	2.90775	5.11492
						2014	8	2	214	37.6	26.2	31.9	17	25.3186	23.0906	13.6777	3.98691	7.8124
						2014	8	3	215	37.3	21.9	29.6	19	34.7805	42.8495	21.8381	6.07102	13.3404
						2014	8	4	216	35.8	21.6	28.7	23.5	35.3008	40.1017	21.2838	5.80456	11.8418
						2014	8	5	217	37.3	23.6	30.45	28.5	35.7363	39.167	21.1636	5.98901	11.2005
						2014	8	6	218	35.3	23	29.15	43	37.9697	37.3622	21.3064	5.86696	8.88246
						2014	8	7	219	37.3	25.8	31.55	28	38.1061	35.0576	20.6758	5.98436	10.258
						2014	8	8	220	37.3	25	31.15	21	35.241	34.6772	19.7752	5.6773	10.8804
						2014	8	9	221	37.3	20.2	28.75	26.5	28.9866	39.6537	19.1786	5.23605	11.3586
						2014	8	10	222	37.3	22.4	29.85	18.5	30.8374	36.7581	19.0454	5.32257	11.622
						2014	8	11	223	37.3	24.4	30.85	23	33.3742	34.4421	19.179	5.47238	10.5591
						2014	8	12	224	37.4	26.7	32.05	19	35.3785	30.284	18.5162	5.41358	9.86392
						2014	8	13	225	37.3	28.3	32.8	19	10.0985	7.27093	4.84729	1.43853	2.8731
						2014	8	14	226	37.3	26.2	31.75	17.5	34.4218	30.5666	18.3491	5.33245	10.0675
						2014	8	15	227	37.3	25.4	31.35	17	30.3286	28.8728	16.7396	4.82544	9.55277
						2014	8	16	228	37.3	27.8	32.55	17	28.8194	21.9027	14.2124	4.19695	7.4917
						2014	8	17	229	37.3	29	33.15	15.5	35.573	23.6204	16.3975	4.89994	8.19175
						2014	8	18	230	37.3	26	31.65	18.5	3.56852	3.22594	1.91932	0.55665	1.62118
						2014	8	19	231	37.3	30.8	34.05	15.5	15.0227	7.81182	6.12809	1.86355	3.18107
						2014	8	20	232	37.9	22.4	30.15	36.5	15.777	19.5635	9.93826	2.79491	5.34697
						2014	8	21	233	34.3	20.3	27.3	18	12.1036	13.5561	7.24602	1.91666	4.56133
						2014	8	22	234	37.3	22.9	30.1	16	10.3234	11.8926	6.26794	1.76087	4.29808
						2014	8	23	235	37.3	26.4	31.85	15	16.8299	14.6757	8.89026	2.58882	5.29997
						2014	8	24	236	37.3	27.1	32.2	17.5	9.97016	8.13565	5.09474	1.49403	3.16659
						2014	8	25	237	37.3	26.1	31.7	14.5	13.5299	12.1228	7.24477	2.10328	4.50753
						2014	8	26	238	37.9	30.2	34.05	14.5	21.7771	13.4147	9.66862	2.94023	5.02871
						2014	8	27	239	37.3	31.9	34.6	15	4.57995	1.97854	1.70285	0.523331	1.31973
						2014	8	28	240	37.3	24.1	30.7	14	6.67043	7.04398	3.87758	1.10299	2.88039
						2014	8	29	241	37.3	24	30.65	18.5	18.3623	19.5375	10.7145	3.04463	6.52718
						2014	8	30	242	37.3	24.2	30.75	19	8.90538	9.33283	5.15713	1.46847	3.4341
						2014	8	31	243	37.3	27.5	32.4	17	19.6644	15.4169	9.8495	2.89992	5.45855
						2014	9	1	244	37	26.5	31.75	17	12.7623	10.7203	6.61672	1.92289	3.96846
						2014	9	2	245	37	25.7	31.35	14	9.55576	8.63841	5.13954	1.48155	3.40638
						2014	9	3	246	37	21.5	29.25	20	14.558	18.0519	9.17037	2.53055	5.89626
						2014	9	4	247	35.9	22.5	29.2	23.5	15.1253	16.2144	8.85885	2.44199	5.16781
						2014	9	5	248	37.2	22.4	29.8	19	1.43323	1.69695	0.882201	0.246288	1.12671
						2014	9	6	249	34.4	19.8	27.1	25	2.06077	2.40698	1.25987	0.331772	1.21785
						2014	9	7	250	32.8	20.6	26.7	27	32.8333	32.0453	18.3491	4.78898	9.00173
						2014	9	8	251	35.1	20.4	27.75	31.5	27.2877	32.0903	16.7396	4.472	8.69581
						2014	9	9	252	34	19.3	26.65	31	23.1679	27.2455	14.2124	3.70515	7.39825
						2014	9	10	253	33.9	20.7	27.3	31.5	28.208	29.7876	16.3975	4.33734	8.06334
						2014	9	11	254	32.5	18.7	25.6	32.5	3.22915	3.56498	1.91932	0.488546	1.38171
						2014	9	12	255	34.3	19.6	26.95	30.5	9.98957	11.7477	6.12809	1.60837	3.52353
						2014	9	13	256	37	23.5	30.25	27	16.9053	18.2578	9.93826	2.80073	5.60235
						2014	9	14	257	35.8	21	28.4	23	11.772	13.938	7.24602	1.9634	4.5055
						2014	9	15	258	32.3	19.7	26	24	11.0362	11.1245	6.26794	1.61015	3.56266
						2014	9	16	259	34.9	19.8	27.35	27.5	14.299	17.2732	8.89026	2.35418	5.12255
						2014	9	17	260	33.1	18.9	26	26.5	8.45003	9.59923	5.09474	1.30877	3.06938
						2014	9	18	261	31.8	18	24.9	30	12.1889	13.4566	7.24477	1.81435	3.86693
						2014	9	19	262	31.8	18.9	25.35	29.5	16.8248	17.3632	9.66862	2.44688	4.89821
						2014	9	20	263	31.4	19.5	25.45	32.5	3.0852	2.93711	1.70285	0.431948	1.22563
						2014	9	21	264	30.9	19.1	25	35	7.05505	6.65996	3.87758	0.973358	2.05859
						2014	9	22	265	30.9	16.8	23.85	29	17.8338	20.1165	10.7145	2.61732	5.49393
						2014	9	23	266	33.2	18.4	25.8	32	8.37832	9.91993	5.15713	1.31875	2.95969
						2014	9	24	267	32.2	19.2	25.7	53	17.0735	17.7564	9.8495	2.51288	3.88493
						2014	9	25	268	30.4	19.7	25.05	50	12.6424	10.8219	6.61672	1.66288	2.50356
						2014	9	26	269	30.7	17.7	24.2	23.5	8.90908	9.26544	5.13954	1.26602	2.99588
						2014	9	27	270	30.5	16	23.25	24.5	15.0516	17.4599	9.17037	2.20784	5.02577
						2014	9	28	271	26	17	21.5	63.5	18.4559	13.2883	8.85885	2.04192	2.80812
						2014	9	29	272	24.1	14.5	19.3	72.5	1.77956	1.3667	0.882201	0.191959	0.602957
						2014	9	30	273	25.7	15.6	20.65	61.5	2.47768	2.00196	1.25987	0.284112	0.734774
						2014	10	1	274	28	14.5	21.25	57.5	31.2125	33.7095	18.3491	4.20246	6.50563
						2014	10	2	275	31.3	18.1	24.7	52.5	28.7964	30.409	16.7396	4.17256	6.26814
						2014	10	3	276	31.4	18.5	24.95	33.5	24.7315	25.5229	14.2124	3.56345	6.60612
						2014	10	4	277	30.8	18.1	24.45	40.5	28.7579	29.218	16.3975	4.06325	6.83153
						2014	10	5	278	29.6	16	22.8	46.5	3.25281	3.53905	1.91932	0.457027	1.10517
						2014	10	6	279	30.6	16.1	23.35	45.5	10.0582	11.6675	6.12809	1.47898	2.76365
						2014	10	7	280	31.4	18.1	24.75	40.5	17.032	18.122	9.93826	2.48015	4.43076
						2014	10	8	281	31.9	19.4	25.65	40	12.8093	12.8093	7.24602	1.84653	3.33078
						2014	10	9	282	31.7	18.6	25.15	38.5	10.8235	11.3431	6.26794	1.5789	3.03703
						2014	10	10	283	30.7	19	24.85	35.5	16.2443	15.2047	8.89026	2.22383	4.03581
						2014	10	11	284	29.1	20.1	24.6	37.5	10.614	7.64211	5.09474	1.26694	2.20884
						2014	10	12	285	28.5	16.5	22.5	44	13.0711	12.5483	7.24477	1.71237	2.9561
						2014	10	13	286	27.8	16.7	22.25	57	18.1377	16.1063	9.66862	2.27109	3.36937
						2014	10	14	287	26.7	15.9	21.3	55.5	3.23851	2.79807	1.70285	0.390501	0.889144
						2014	10	15	288	24.8	15.4	20.1	60.5	7.90455	5.94422	3.87758	0.861922	1.42625
						2014	10	16	289	19.5	14	16.75	67	28.5543	12.5639	10.7145	2.17115	2.39655
						2014	10	17	290	23.2	11.4	17.3	65.5	9.38311	8.85766	5.15713	1.06165	1.81772
						2014	10	18	291	24.4	11.9	18.15	76	17.4116	17.4116	9.8495	2.07673	3.30998
						2014	10	19	292	19.2	14.8	17	81	19.715	6.93967	6.61672	1.35048	1.48707
						2014	10	20	293	21	9.5	15.25	68	9.4723	8.71452	5.13954	0.99624	1.68854
						2014	10	21	294	24.6	12.7	18.65	64.5	16.6147	15.8172	9.17037	1.96043	3.07669
						2014	10	22	295	22.4	11.1	16.75	66	16.4709	14.8897	8.85885	1.79512	2.77692
						2014	10	23	296	22.8	12.7	17.75	65.5	1.73495	1.40184	0.882201	0.18394	0.586682
						2014	10	24	297	24.7	12.7	18.7	60.5	2.27308	2.18216	1.25987	0.269703	0.734887
						2014	10	25	298	26	13.4	19.7	58.5	32.308	32.5664	18.3491	4.03566	6.09933
						2014	10	26	299	27	14.1	20.55	57	29.1294	30.0615	16.7396	3.76512	5.76149
						2014	10	27	300	26.5	14.9	20.7	57	26.0806	24.2028	14.2124	3.20918	4.72607
						2014	10	28	301	25.1	15.9	20.5	56.5	33.7882	24.8681	16.3975	3.68337	4.82588
						2014	10	29	302	26.7	15.4	21.05	56.5	3.56852	3.22594	1.91932	0.437327	0.962252
						2014	10	30	303	19	14.5	16.75	54	18.0551	6.49982	6.12809	1.24177	1.40481
						2014	10	31	304	17.8	12	14.9	78.5	25.7915	11.9673	9.93826	1.90601	2.17159
						2014	11	1	305	21.1	10	15.55	76	13.5931	12.0707	7.24602	1.41731	2.23442
						2014	11	2	306	20.6	9.2	14.9	68.5	11.6025	10.5815	6.26794	1.2021	1.95751
						2014	11	3	307	15.9	6.5	11.2	49.5	18.123	13.6285	8.89026	1.5121	2.09788
						2014	11	4	308	17.4	5.4	11.4	53	9.19203	8.82435	5.09474	0.872515	1.46103
						2014	11	5	309	18.4	4.9	11.65	46.5	12.3236	13.3095	7.24477	1.25135	2.19122
						2014	11	6	310	20.2	7.1	13.65	51	16.6959	17.4973	9.66862	1.78342	2.89297
						2014	11	7	311	22.7	9.5	16.1	51.5	2.92934	3.09339	1.70285	0.338567	0.831842
						2014	11	8	312	22	7.9	14.95	53.5	6.45403	7.28015	3.87758	0.744801	1.44995
						2014	11	9	313	21.4	7.5	14.45	55.5	17.9616	19.9733	10.7145	2.02661	3.35595
						2014	11	10	314	21.7	9.5	15.6	49	9.22801	9.00654	5.15713	1.01023	1.77874
						2014	11	11	315	22.8	9.6	16.2	50.5	16.9437	17.8925	9.8495	1.96409	3.21641
						2014	11	12	316	22.2	9.4	15.8	56	11.5589	11.8363	6.61672	1.30392	2.21465
						2014	11	13	317	20.3	8.9	14.6	49	9.51376	8.67655	5.13954	0.976647	1.66978
						2014	11	14	318	20.8	9.1	14.95	40.5	16.7561	15.6837	9.17037	1.76143	3.12359
						2014	11	15	319	20.4	13.3	16.85	36	20.7792	11.8026	8.85885	1.80032	2.73411
						2014	11	16	320	19.7	11.7	15.7	44	1.94941	1.24762	0.882201	0.173333	0.574481
						2014	11	17	321	16.4	11.3	13.85	73.5	3.48674	1.42259	1.25987	0.233866	0.522749
						2014	11	18	322	20.6	10	15.3	83.5	35.2243	29.8702	18.3491	3.56214	5.00288
						2014	11	19	323	21.1	9.4	15.25	85.5	30.5867	28.6292	16.7396	3.24478	4.80082
						2014	11	20	324	18.6	9.7	14.15	82	29.7749	21.1998	14.2124	2.66321	3.50465
						2014	11	21	325	12.4	8.7	10.55	83.5	53.2792	15.7707	16.3975	2.72647	2.28623
						2014	11	22	326	14.1	7.6	10.85	83.5	4.70512	2.44666	1.91932	0.322508	0.590293
						2014	11	23	327	14.6	5.9	10.25	80	12.9851	9.03764	6.12809	1.00815	1.40032
						2014	11	24	328	11.1	6.8	8.95	82.5	29.9541	10.3042	9.93826	1.5592	1.43581
						2014	11	25	329	14.7	6.6	10.65	84.5	15.9125	10.3113	7.24602	1.20907	1.59621
						2014	11	26	330	10.3	7.1	8.7	86	21.8993	5.60622	6.26794	0.974179	0.87581
						2014	11	27	331	9.9	6.7	8.3	80.5	31.0613	7.95169	8.89026	1.36089	1.1089
						2014	11	28	332	14.8	4.8	9.8	87.5	10.0694	8.05549	5.09474	0.824706	1.24282
						2014	11	29	333	14.3	5.7	10	82.5	15.4403	10.6229	7.24477	1.18124	1.5764
						2014	11	30	334	14.8	5.1	9.95	84.5	19.4025	15.0564	9.66862	1.5736	2.11976
						2014	12	1	335	10.1	6.6	8.35	94	5.68883	1.59287	1.70285	0.261166	0.408271
						2014	12	2	336	10.7	8.8	9.75	85.5	17.5818	2.67244	3.87758	0.626542	0.581595
						2014	12	3	337	10.8	9.4	10.1	81	56.5965	6.3388	10.7145	1.75326	1.05142
						2014	12	4	338	13.8	8.6	11.2	65.5	14.1347	5.88003	5.15713	0.87715	1.05618
						2014	12	5	339	16.6	9.1	12.85	66.5	22.4783	13.487	9.8495	1.77057	2.22804
						2014	12	6	340	16.9	7.9	12.4	85	13.7848	9.92507	6.61672	1.17197	1.68562
						2014	12	7	341	17	9.9	13.45	86.5	12.0552	6.84737	5.13954	0.941982	1.30982
						2014	12	8	342	15.4	10.4	12.9	86	25.632	10.2528	9.17037	1.65118	1.76913
						2014	12	9	343	16.5	11.2	13.85	85	24.0503	10.1973	8.85885	1.64444	1.82862
						2014	12	10	344	11.4	10.2	10.8	74.5	5.03335	0.483201	0.882201	0.147979	0.333918
						2014	12	11	345	16.6	8.2	12.4	79	2.71685	1.82572	1.25987	0.223152	0.549344
						2014	12	12	346	15.4	8.8	12.1	83.5	44.6399	23.5699	18.3491	3.21776	3.55167
						2014	12	13	347	11.3	8.6	9.95	92	63.6713	13.753	16.7396	2.72444	1.95863
						2014	12	14	348	11	9.2	10.1	87	66.2079	9.53394	14.2124	2.32562	1.44998
						2014	12	15	349	15.8	8.5	12.15	81	37.9313	22.1519	16.3975	2.88034	3.36306
						2014	12	16	350	16.5	6.9	11.7	86.5	3.87161	2.9734	1.91932	0.332076	0.687826
						2014	12	17	351	15.6	6.4	11	95	12.6273	9.29371	6.12809	1.03511	1.49302
						2014	12	18	352	12.7	7.3	10	88	26.7297	11.5472	9.93826	1.6204	1.69102
						2014	12	19	353	9.7	7.2	8.45	74.5	28.6424	5.72848	7.24602	1.11557	0.87337
						2014	12	20	354	11.5	6.9	9.2	77.5	18.2653	6.72162	6.26794	0.992559	1.03846
						2014	12	21	355	14.4	4.5	9.45	92.5	17.6594	13.9863	8.89026	1.42085	1.92619
						2014	12	22	356	7.8	4.7	6.25	89	18.0851	4.48511	5.09474	0.71863	0.599495
						2014	12	23	357	9.9	3.6	6.75	80.5	18.0399	9.09211	7.24477	1.04314	1.0758
						2014	12	24	358	12.3	2.5	7.4	90.5	19.3033	15.1338	9.66862	1.429	1.7639
						2014	12	25	359	12.6	3	7.8	75	3.43496	2.63805	1.70285	0.255673	0.501422
						2014	12	26	360	12.8	2.9	7.85	91	7.70235	6.10026	3.87758	0.583333	0.872254
						2014	12	27	361	9.8	3.6	6.7	89	26.8941	13.3395	10.7145	1.5396	1.47682
						2014	12	28	362	9.9	6.2	8.05	80.5	16.7566	4.95997	5.15713	0.781873	0.763262
						2014	12	29	363	8.7	5.6	7.15	90.5	34.9634	8.67092	9.8495	1.44129	1.07682
						2014	12	30	364	14.3	6.5	10.4	75	14.8073	9.23974	6.61672	1.09436	1.43807
						2014	12	31	365	14	4.7	9.35	91	10.5333	7.83675	5.13954	0.818394	1.18163
																	1282.35	2110.29
																	ETo-HS	ETo-TURC (Ousman Couly (2016)

## Sheet: 2015
	DİYARBAKIR					year	month	day	DOY	Tmax	Tmin	Tmean	RHmean.	Ra	Rs=0.16(Tmax-Tmin)^0.5*Ra	Rs=from meteorological station	ETo-HS	ETo-TURC (Ousman Couly (2016)
	DOY	246					#	#		°C	°C	°C	%	MJ m-2 day-1*(0.408 mm day-1)
	φ (-)	37.89	0.661305			2015	1	1	1	12.6	5.8	9.2	82.5	21.3309	11.604	8.89989	1.40934	1.61386
	tan(φ)		0.778198			2015	1	2	2	12.9	6.4	9.65	81	5.10132	2.65269	2.08094	0.335019	0.575568
	sin(φ)		0.614147			2015	1	3	3	12.1	6.6	9.35	77	13.0062	5.72274	4.88037	0.777124	0.929989
	cos(φ)		0.789191			2015	1	4	4	12	3.1	7.55	74	7.84285	5.58411	3.7436	0.55659	0.796508
	dr	0.984766		(1+0.033*cos(2*3.14/365*DOY))		2015	1	5	5	9.2	5.3	7.25	78.5	3.7792	1.17911	1.19413	0.17544	0.330217
	δ	0.120494		(0.409*sin(2*3.14/365*DOY-1.39))		2015	1	6	6	11.2	5.5	8.35	67.5	28.0336	12.7833	10.7087	1.64239	1.6488
	tan(δ)	0.121081				2015	1	7	7	7.4	2.5	4.95	74.5	24.1189	9.45461	8.54232	1.13979	0.88798
	sin(δ)	0.120203				2015	1	8	8	5.3	-0.2	2.55	77.5	6.51204	2.8653	2.44353	0.291642	0.2232
	cos(δ)	0.992749				2015	1	9	9	3.7	-2.2	0.75	80	6.86595	3.24073	2.66838	0.290308	0.0786917
	X	0.991122				2015	1	10	10	5.8	-3.1	1.35	73	21.804	15.5245	10.4076	1.16893	0.450866		-
	ωs (eq. 25)	1.49064		(acos{(-1*tan(-0.35)*tan(0.409*sin(2*3.14/365*DOY-1.39))))		2015	1	11	11	6.6	-0.9	2.85	77	24.5394	14.7237	10.7526	1.30228	0.832205
	sin ωs	0.996789				2015	1	12	12	6.9	-1.2	2.85	77.5	21.5847	13.9869	9.82898	1.19041	0.795738
	sin φ*sin δ	-0.0738224		(sin(0.35)*sin(0.409*sin(2*3.14/365*DOY-1.39)))		2015	1	13	13	7.5	2.4	4.95	74.5	30.3204	12.3707	10.9557	1.46181	1.11228
	cos φ*cos δ	0.783469		(cos(0.35)*cos(0.409*sin(2*3.14/365*DOY-1.39))		2015	1	14	14	11.9	0.4	6.15	79	7.8649	7.23571	4.26739	0.599426	0.840637
	Gsc	0.082				2015	1	15	15	6.7	1.9	4.3	94	16.4474	6.31579	5.7655	0.747304	0.580566
						2015	1	16	16	7.1	2.1	4.6	85	28.9556	11.5822	10.3595	1.36099	0.994726
	Ra	24.8453				2015	1	17	17	10.8	0.7	5.75	91.5	18.8374	15.2206	9.5786	1.323	1.48705
						2015	1	18	18	13.1	1.7	7.4	90	20.9303	19.0884	11.307	1.67115	2.1689
						2015	1	19	19	16	2.2	9.1	72	20.7401	22.8971	12.3274	1.94487	2.92483
						2015	1	20	20	16.7	3.5	10.1	72.5	16.4092	17.3281	9.53882	1.56087	2.42224
						2015	1	21	21	14.3	4.6	9.45	75.5	22.5467	17.4962	11.2354	1.79566	2.34674
						2015	1	22	22	14.9	3.8	9.35	75	26.5515	23.5778	14.1537	2.25377	3.05536
						2015	1	23	23	15.8	5.4	10.6	71	27.6578	23.0112	14.271	2.37706	3.22198
						2015	1	24	24	15.8	3.4	9.6	69.5	22.4875	22.3076	12.6699	2.03606	2.95151
						2015	1	25	25	15.1	4.5	9.8	65.5	11.8282	10.0303	6.16159	0.997401	1.48474
						2015	1	26	26	15.2	5	10.1	60.5	6.49765	5.30208	3.32029	0.543311	0.922096
						2015	1	27	27	17.2	4.3	10.75	70.5	9.98908	10.3087	5.74038	0.961202	1.60461
						2015	1	28	28	11.5	4.8	8.15	84.5	36.7827	19.7155	15.2336	2.3185	2.37977
						2015	1	29	29	12.9	2.8	7.85	84.5	31.1484	25.1679	15.8386	2.38271	2.90294
						2015	1	30	30	9.9	4.4	7.15	79.5	28.4093	12.5001	10.6601	1.55991	1.46
						2015	1	31	31	6.9	2.8	4.85	78.5	18.9903	6.22881	6.15238	0.817296	0.630092
						2015	2	1	32	13.9	3.8	8.85	67.5	30.572	24.7022	15.5455	2.4298	3.08194
						2015	2	2	33	17.1	4.2	10.65	72.5	28.4	29.3088	16.3205	2.72323	4.04145
						2015	2	3	34	16.3	6.1	11.2	69.5	32.0687	26.1681	16.3871	2.7872	3.74473
						2015	2	4	35	15	6	10.5	75	23.592	16.9862	11.3242	1.87958	2.43503
						2015	2	5	36	14.8	4.5	9.65	76	12.8676	10.6029	6.6075	1.06377	1.5404
						2015	2	6	37	16.7	4.3	10.5	68.5	12.3971	12.2979	6.98475	1.15933	1.83658
						2015	2	7	38	16.6	5.5	11.05	68	17.7183	15.7339	9.44503	1.59815	2.34379
						2015	2	8	39	15.9	5.9	10.9	69	22.0164	17.6131	11.1395	1.87506	2.57053
						2015	2	9	40	10.2	6.4	8.3	78.5	29.1669	8.86675	9.09709	1.39255	1.20995
						2015	2	10	41	12.6	6.3	9.45	78.5	34.4294	17.3524	13.8267	2.20981	2.32951
						2015	2	11	42	10.7	4.9	7.8	57	37.1953	17.2586	14.3325	2.15194	2.05197
						2015	2	12	43	10	4.4	7.2	73.5	17.7431	7.94889	6.71804	0.985033	1.00932
						2015	2	13	44	9.4	5.1	7.25	74.5	34.9755	12.0316	11.6043	1.70488	1.42644
						2015	2	14	45	12.3	4.3	8.3	77	18.1211	11.5975	8.20066	1.25533	1.5115
						2015	2	15	46	11.1	3.1	7.1	74.5	36.1903	23.1618	16.3779	2.3918	2.5149
						2015	2	16	47	7.2	5.7	6.45	78	96.0647	11.5278	18.8248	2.67737	1.2694
						2015	2	17	48	7.8	4.3	6.05	75	63.2136	17.6998	18.9219	2.6468	1.76322
						2015	2	18	49	11.1	3.5	7.3	70.5	42.2393	25.6815	18.6313	2.74274	2.81825
						2015	2	19	50	11.9	5.7	8.8	78	46.0153	22.8236	18.3324	2.86001	2.85564
						2015	2	20	51	6.2	0.1	3.15	79.5	43.776	21.3627	17.299	2.12556	1.26179
						2015	2	21	52	5.4	-0.6	2.4	72.5	44.8626	21.534	17.5825	2.08305	1.01013
						2015	2	22	53	12.9	2	7.45	66.5	33.0843	28.8495	17.4765	2.58812	3.18284
						2015	2	23	54	14.5	2.9	8.7	62	32.7713	30.4117	17.8584	2.7756	3.69862
						2015	2	24	55	12.3	6.5	9.4	66.5	35.9034	16.6592	13.8347	2.20702	2.23914
						2015	2	25	56	9	4.5	6.75	75.5	56.2956	20.2664	19.1074	2.75119	2.15084
						2015	2	26	57	17	3.5	10.25	72	28.5324	30.815	16.7735	2.75947	4.14081
						2015	2	27	58	17.4	6.9	12.15	65	26.8789	22.5782	13.9356	2.44788	3.42221
						2015	2	28	59	9.9	8.6	9.25	76.5	72.233	7.51223	13.1773	2.09056	1.13544
						2015	3	1	60	17.6	6.5	12.05	68	15.2088	13.5054	8.10729	1.41934	2.15366
						2015	3	2	61	16.1	8.5	12.3	74	23.0884	14.0377	10.184	1.79785	2.25257
						2015	3	3	62	13.1	8.3	10.7	69	5.51829	2.11902	1.93439	0.323339	0.543242
						2015	3	4	63	17.6	6.4	12	71.5	24.3059	21.778	13.0149	2.2747	3.28849
						2015	3	5	64	13.7	4.3	9	55	41.1974	30.9804	20.2094	3.17655	3.84444
						2015	3	6	65	16.5	3.4	9.95	55.5	35.5131	37.2177	20.5657	3.34715	4.8595
						2015	3	7	66	19.7	5.9	12.8	60	30.4233	33.5873	18.0828	3.2453	5.09236
						2015	3	8	67	21.6	8.4	15	59.5	31.7114	33.4872	18.4341	3.54621	5.51447
						2015	3	9	68	24.8	9.4	17.1	60.5	26.8577	33.0887	16.8636	3.45178	5.80942
						2015	3	10	69	23.8	10.3	17.05	54	14.3292	15.4756	8.42383	1.72179	2.89681
						2015	3	11	70	18.2	9.7	13.95	55	10.7494	7.30961	5.01435	0.933741	1.4041
						2015	3	12	71	14.2	8	11.1	56.5	21.4007	10.6148	8.52599	1.44514	1.67499
						2015	3	13	72	16.9	7.1	12	75	22.3653	17.5344	11.2023	1.95791	2.70381
						2015	3	14	73	19.1	7.6	13.35	71.5	26.338	24.231	14.2906	2.61083	3.84231
						2015	3	15	74	19.3	8.6	13.95	61	22.6145	19.358	11.8358	2.20399	3.20386
						2015	3	16	75	15.9	6.8	11.35	68.5	24.1838	17.6058	11.6725	1.99559	2.62997
						2015	3	17	76	17.3	8	12.65	78.5	7.51702	5.59266	3.66781	0.655032	1.0896
						2015	3	18	77	16.6	7	11.8	68.5	38.2634	29.3863	18.9688	3.29306	4.29628
						2015	3	19	78	14.2	8.5	11.35	77	63.1906	28.8149	24.1385	4.12683	4.12671
						2015	3	20	79	16.2	7.9	12.05	70	39.2653	26.0722	18.0996	3.1687	3.88909
						2015	3	21	80	11.6	4.6	8.1	65	44.0895	24.6901	18.664	2.83512	2.91103
						2015	3	22	81	11.4	3.2	7.3	74	32.8895	21.5755	15.069	2.21833	2.40158
						2015	3	23	82	16.7	2.5	9.6	64.5	40.3605	45.8496	24.3344	3.91057	5.79952
						2015	3	24	83	14	7.5	10.75	71.5	59.9339	31.1656	24.4483	4.09377	4.30386
						2015	3	25	84	17.3	7.1	12.2	80.5	47.178	38.4972	24.1079	4.24179	5.64342
						2015	3	26	85	21.3	7.3	14.3	72	38.3049	42.9014	22.9318	4.31729	6.80707
						2015	3	27	86	21.5	9.6	15.55	60.5	35.305	33.6103	19.4863	3.81148	5.63317
						2015	3	28	87	20.1	11.7	15.9	68.5	34.0062	22.8522	15.7695	3.11685	3.97864
						2015	3	29	88	15.3	11.6	13.45	73.5	70.9814	21.0105	21.8457	4.0039	3.3855
						2015	3	30	89	17.6	8	12.8	67.5	31.5776	24.2516	15.6544	2.80947	3.75984
						2015	3	31	90	20.6	7.8	14.2	66.5	17.8654	18.2942	10.2267	1.91936	3.07298
						2015	4	1	91	18.4	9.6	14	74.5	29.8069	20.9841	14.1475	2.6386	3.45315
						2015	4	2	92	20.3	8.5	14.4	74.5	31.1425	29.3985	17.1165	3.23249	4.78111
						2015	4	3	93	20.5	8.3	14.4	71.5	47.5838	46.4418	26.5925	5.02207	7.3689
						2015	4	4	94	19.8	11	15.4	66.5	54.1524	38.1233	25.7027	5.00479	6.31508
						2015	4	5	95	19.4	6.9	13.15	55	46.4808	46.4808	26.2935	4.77285	7.03371
						2015	4	6	96	22.9	9.5	16.2	60	41.357	44.3347	24.2226	4.83024	7.47259
						2015	4	7	97	26.1	11.6	18.85	58	40.8466	47.3821	24.8863	5.34936	8.54032
						2015	4	8	98	24.2	12.6	18.4	56	16.9519	15.7314	9.23778	1.9613	3.04351
						2015	4	9	99	25.1	15	20.05	45	36.0535	29.1312	18.3328	4.0697	5.932
						2015	4	10	100	19.6	8.8	14.2	55	48.2663	41.7021	25.3791	4.76315	6.60181
						2015	4	11	101	17.9	9.4	13.65	60	57.5547	39.1372	26.8479	4.95221	6.0891
						2015	4	12	102	13.6	7.9	10.75	78.5	44.6634	20.3665	17.0612	2.85682	2.90627
						2015	4	13	103	18.8	7.1	12.95	79.5	15.4777	14.4872	8.47072	1.52768	2.381
						2015	4	14	104	17.8	8.9	13.35	75	35.9652	25.6072	17.1671	3.13634	4.04321
						2015	4	15	105	19.9	7.1	13.5	61	29.297	30.0002	16.7706	3.07866	4.71219
						2015	4	16	106	22.2	10.5	16.35	67.5	36.2886	33.9662	19.8602	3.97779	5.82937
						2015	4	17	107	25.8	12.6	19.2	59	42.5205	44.9016	24.7175	5.36383	8.17819
						2015	4	18	108	26.4	10.8	18.6	59	35.8302	44.7161	22.6429	4.83394	8.03226
						2015	4	19	109	25.7	9.9	17.8	61	42.3172	53.4889	26.9132	5.61931	9.35014
						2015	4	20	110	24.4	10.8	17.6	61.5	47.8952	52.1099	28.2606	5.86749	9.07101
						2015	4	21	111	23.7	13	18.35	55.5	44.1689	37.8086	23.1168	4.90123	6.80549
						2015	4	22	112	18.7	9.4	14.05	68.5	53.6626	39.925	26.1838	4.89114	6.29935
						2015	4	23	113	15.8	8.6	12.2	62.5	61.7198	35.5506	26.4978	4.6623	5.2337
						2015	4	24	114	15.8	4.7	10.25	70	53.3921	47.4122	28.4616	4.6823	6.22943
						2015	4	25	115	21.4	7.1	14.25	62.5	48.8237	55.8543	29.5405	5.55283	8.75107
						2015	4	26	116	23	10.3	16.65	63	50.1815	50.9844	28.6131	5.78126	8.6554
						2015	4	27	117	26.5	12.9	19.7	57	38.3475	41.7221	22.627	4.97652	7.71067
						2015	4	28	118	29	14	21.5	53.5	22.1128	26.5353	13.7028	3.15842	5.22707
						2015	4	29	119	29.9	16.3	23.1	59	42.7186	46.4779	25.2062	6.04642	9.12846
						2015	4	30	120	29.8	17.3	23.55	48	39.8823	39.8823	22.5608	5.4714	8.1757
						2015	5	1	121	29.8	15.2	22.5	54.5	23.0698	26.9455	14.1039	3.33359	5.4006
						2015	5	2	122	25.9	11.8	18.85	52	17.9063	20.1983	10.7581	2.31247	3.84761
						2015	5	3	123	25.9	13.8	19.85	56	23.0527	22.315	12.8302	2.83313	4.30922
						2015	5	4	124	27.8	14.8	21.3	58	38.1163	39.641	21.9889	5.04252	7.5909
						2015	5	5	125	36.7	14.9	25.8	57.5	26.1113	45.5381	19.5064	4.98806	9.33652
						2015	5	6	126	28.1	17.2	22.65	53	47.7789	41.6632	25.2388	5.98764	8.1597
						2015	5	7	127	28.4	15.5	21.95	53	44.4095	45.8306	25.5206	5.94971	8.82479
						2015	5	8	128	31.7	15.6	23.65	40.5	39.4108	50.7611	25.3016	6.15093	11.3859
						2015	5	9	129	27.3	17.5	22.4	65	43.832	34.3643	21.9545	5.17629	6.76841
						2015	5	10	130	36.7	15.3	26	64.5	37.8235	64.7539	27.9955	7.19169	13.1405
						2015	5	11	131	36.7	17.8	27.25	67.5	42.9646	64.9624	29.8855	7.89631	13.4065
						2015	5	12	132	25.6	13.8	19.7	64	55.9917	52.8561	30.774	6.76836	9.6702
						2015	5	13	133	27.2	13.2	20.2	67.5	47.4724	53.1691	28.4201	6.33399	9.83048
						2015	5	14	134	26.7	14.4	20.55	64	47.6265	46.8645	26.7252	6.01111	8.77256
						2015	5	15	135	27.9	14.2	21.05	56	49.8036	54.5847	29.4945	6.72047	10.2588
						2015	5	16	136	31	16.7	23.85	58.5	50.1503	57.3719	30.3432	7.41215	11.3161
						2015	5	17	137	36.7	19.3	28	55	43.9808	61.2213	29.3534	7.88482	12.7801
						2015	5	18	138	36.7	20.7	28.7	53	35.0393	44.8503	22.4252	6.11584	9.5567
						2015	5	19	139	35.5	21	28.25	52.5	37.3143	43.2845	22.7342	6.14011	9.18769
						2015	5	20	140	36.7	22	29.35	48	22.3038	26.2293	13.6823	3.78363	5.97577
						2015	5	21	141	36.7	22.1	29.4	58.5	48.6763	56.8539	29.7587	8.23804	12.0994
						2015	5	22	142	33.3	20.7	27	54	37.8887	38.1918	21.5187	5.65407	8.0276
						2015	5	23	143	31.6	16.8	24.2	58.5	31.2665	37.0195	19.2455	4.74076	7.48469
						2015	5	24	144	32.7	20.8	26.75	54.5	51.3705	48.9047	28.3535	7.40837	10.1287
						2015	5	25	145	33.9	20.2	27.05	43.5	40.8727	44.7965	24.2055	6.36713	10.2182
						2015	5	26	146	32.9	17	24.95	51	39.4558	50.1877	25.1727	6.31151	10.1212
						2015	5	27	147	33.9	19.6	26.75	46.5	51.5488	58.9719	31.1894	8.14934	12.7347
						2015	5	28	148	33.7	20.1	26.9	47.5	51.1061	55.6034	30.1552	7.90565	11.8923
						2015	5	29	149	29.5	16.6	23.05	51.5	55.039	56.8003	31.629	7.57785	11.0591
						2015	5	30	150	28.5	16.6	22.55	50	56.1519	53.4566	30.9926	7.33448	10.3408
						2015	5	31	151	29.9	16.3	23.1	47.5	51.6042	56.1454	30.4491	7.30409	11.3364
						2015	6	1	152	34.6	19.5	27.05	48.5	48.9263	59.1029	30.4194	8.00168	12.4644
						2015	6	2	153	30.2	22.5	26.35	55	68.3414	42.0983	30.3424	7.85684	8.72919
						2015	6	3	154	34.8	22.2	28.5	40	54.112	54.5449	30.7326	8.34542	13.146
						2015	6	4	155	33	17.1	25.05	43.5	46.3197	58.9187	29.5518	7.42683	12.9277
						2015	6	5	156	36.5	21	28.75	43	46.3373	57.4583	29.1888	7.96901	13.3439
						2015	6	6	157	31.3	16.7	24	42	49.6967	58.0458	30.3825	7.44849	12.7831
						2015	6	7	158	34.1	19.4	26.75	41.5	49.8216	58.5902	30.563	7.98568	13.516
						2015	6	8	159	34.5	20.1	27.3	39.5	50.5448	58.2276	30.6886	8.11749	13.878
						2015	6	9	160	36.1	20	28.05	32.5	45.7559	58.9336	29.3752	7.89928	15.4074
						2015	6	10	161	33.1	20.6	26.85	38.5	53.1571	53.1571	30.0702	7.87455	12.7932
						2015	6	11	162	31.7	17.1	24.4	39	49.0913	57.3386	30.0124	7.42816	13.2019
						2015	6	12	163	32.1	17.4	24.75	38	49.8796	58.6584	30.5986	7.63606	13.7357
						2015	6	13	164	34.7	19	26.85	33	47.3568	59.4802	30.0229	7.86216	15.2196
						2015	6	14	165	35.5	19.8	27.65	32	33.8006	42.4536	21.4286	5.71211	11.254
						2015	6	15	166	35.4	22.4	28.9	41.5	51.3424	53.3961	29.6188	8.11247	12.6985
						2015	6	16	167	34.5	22.1	28.3	39.5	54.5251	54.0889	30.7204	8.30608	13.0898
						2015	6	17	168	35.7	23.2	29.45	32.5	52.508	52.508	29.703	8.23133	14.0172
						2015	6	18	169	37	22.5	29.75	30.5	47.6907	55.3212	29.0561	8.10319	15.1278
						2015	6	19	170	34.9	20.9	27.9	28.5	46.7045	52.3091	27.9604	7.49423	14.3358
						2015	6	20	171	33.6	21.2	27.4	38	51.3928	50.9816	28.9556	7.67608	12.4545
						2015	6	21	172	34.2	19.3	26.75	37	39.0872	46.5919	24.1406	6.30759	11.4651
						2015	6	22	173	36.1	20.8	28.45	31	49.6444	60.7648	31.0696	8.42783	16.2213
						2015	6	23	174	36.4	23.8	30.1	29	54.707	55.1446	31.0705	8.72874	15.3941
						2015	6	24	175	36.1	20.9	28.5	30.5	49.8746	60.6475	31.1115	8.44831	16.2918
						2015	6	25	176	35.6	23	29.3	33	54.5743	55.0109	30.9951	8.56213	14.5509
						2015	6	26	177	34.6	22.9	28.75	42.5	55.6092	52.0502	30.434	8.30897	12.2108
						2015	6	27	178	35.3	22.2	28.75	36	53.2363	55.7917	30.8293	8.41688	14.1496
						2015	6	28	179	34.8	20	27.4	29.5	49.5176	58.6288	30.4797	8.0801	15.7261
						2015	6	29	180	34.1	21.6	27.85	33	52.8003	52.8003	29.8684	7.99688	13.7453
						2015	6	30	181	33.5	20.7	27.1	29	54.2201	55.5214	31.0374	8.17334	14.9452
						2015	7	1	182	36.7	21.4	29.05	26.5	48.7573	59.6789	30.5144	8.38461	16.8673
						2015	7	2	183	36.8	25.6	31.2	23.5	54.4161	48.7568	29.1378	8.37375	14.6746
						2015	7	3	184	36.7	23.5	30.1	28	49.9753	52.7739	29.0511	8.16142	14.9186
						2015	7	4	185	36.8	23	29.9	26	51.3797	56.7232	30.5387	8.54353	16.3039
						2015	7	5	186	36.7	22.2	29.45	24	48.7655	56.568	29.711	8.23354	16.5225
						2015	7	6	187	37.6	23.2	30.4	27	48.1629	55.4836	29.2424	8.26663	15.8777
						2015	7	7	188	36.7	27.1	31.9	27.5	62.2786	47.83	30.8741	8.99951	13.909
						2015	7	8	189	37.1	26.9	32	23.5	60.3798	49.2699	30.854	9.01174	14.944
						2015	7	9	190	36.7	22.1	29.4	31.5	49.7782	58.141	30.4324	8.42453	15.6312
						2015	7	10	191	36.7	25.3	31	24.5	55.6402	50.7438	30.0581	8.60298	15.0585
						2015	7	11	192	36.7	28	32.35	29.5	63.8201	44.4188	30.1188	8.85883	12.7351
						2015	7	12	193	37.7	28.8	33.25	26.5	64.6016	45.9963	30.836	9.23255	13.7212
						2015	7	13	194	37	26.5	31.75	25.5	59.2598	49.7782	30.7238	8.92866	14.7421
						2015	7	14	195	36.8	24.1	30.45	21	52.9814	53.8291	30.2096	8.54891	16.4253
						2015	7	15	196	37.2	28.7	32.95	27	63.0425	42.8689	29.4078	8.7532	12.7242
						2015	7	16	197	37.4	29.3	33.35	27	64.504	41.7986	29.3731	8.81176	12.468
						2015	7	17	198	36.7	29.1	32.9	26	66.9404	40.6998	29.5267	8.77993	12.2347
						2015	7	18	199	37.1	28.4	32.75	25	62.3429	43.3907	29.4216	8.7228	13.1236
						2015	7	19	200	36.7	27.6	32.15	22.5	62.2889	45.3463	30.0643	8.80755	13.9662
						2015	7	20	201	37	25.6	31.3	25.5	53.0825	48.4112	28.6763	8.25797	14.2877
						2015	7	21	202	36.7	27.2	31.95	23.5	57.4655	43.6738	28.3393	8.26894	13.3091
						2015	7	22	203	37	26.2	31.6	22	53.7543	46.4437	28.2648	8.18918	14.2835
						2015	7	23	204	37.7	29.3	33.5	23	62.12	41.7447	28.8066	8.66716	13.0064
						2015	7	24	205	36.7	26.3	31.5	21.5	57.4829	47.8258	29.6603	8.57611	14.7501
						2015	7	25	206	37.2	26.6	31.9	20.5	55.6014	47.15	28.964	8.44273	14.7578
						2015	7	26	207	36.7	25.2	30.95	25	51.7361	47.5972	28.0713	8.02612	14.0802
						2015	7	27	208	37.6	23.1	30.35	24.5	45.451	52.7232	27.6916	7.82009	15.5143
						2015	7	28	209	37.3	24.9	31.1	23.5	50.1131	49.7122	28.2346	8.09765	14.9348
						2015	7	29	210	37.5	27.9	32.7	22	56.7617	43.593	28.1392	8.33432	13.5917
						2015	7	30	211	36.7	30.6	33.65	22	70.1279	34.2224	27.7125	8.36236	10.9005
						2015	7	31	212	36.7	24.1	30.4	22.5	48.3587	48.7456	27.465	7.76418	14.6979
						2015	8	1	213	37.1	25.2	31.15	30.5	50.9381	48.4931	28.1149	8.07155	13.5325
						2015	8	2	214	37.1	26	31.55	25	51.24	45.5011	27.3143	7.90579	13.5704
						2015	8	3	215	37.1	27.9	32.5	20.5	57.6098	42.4008	27.9583	8.24796	13.4136
						2015	8	4	216	37.1	28.9	33	23	57.8002	37.917	26.4824	7.89021	11.8153
						2015	8	5	217	37.1	29.3	33.2	24	61.6372	38.4616	27.5429	8.2385	11.875
						2015	8	6	218	37.5	25.8	31.65	22.5	49.0948	45.9527	26.8688	7.79261	14.074
						2015	8	7	219	37.5	24.5	31	26	45.9164	47.7531	26.4886	7.58137	13.983
						2015	8	8	220	37.1	26.6	31.85	23.5	49.2764	41.3922	25.5478	7.43945	12.6329
						2015	8	9	221	37.1	23.5	30.3	26	42.9982	46.782	25.3711	7.15736	13.6081
						2015	8	10	222	37.1	23.3	30.2	28.5	45.325	50.0388	26.94	7.58415	14.1134
						2015	8	11	223	37.8	22.8	30.3	28.5	42.0709	50.485	26.0704	7.35462	14.2498
						2015	8	12	224	37.1	23	30.05	24	43.3057	48.8488	26.018	7.3017	14.4455
						2015	8	13	225	37.3	24.1	30.7	26.5	42.3635	44.7358	24.6263	7.005	13.0252
						2015	8	14	226	37.1	24.7	30.9	29	43.1721	42.8267	24.324	6.94754	12.1859
						2015	8	15	227	37.7	24.6	31.15	28.5	41.4909	43.4825	24.0275	6.8981	12.4645
						2015	8	16	228	37.1	22.7	29.9	29.5	40.6234	46.7981	24.6648	6.90023	13.0479
						2015	8	17	229	36.9	22.4	29.65	30.5	39.9986	46.3983	24.3696	6.78192	12.7622
						2015	8	18	230	37.1	24	30.55	23	44.3338	46.4619	25.6738	7.2804	13.9883
						2015	8	19	231	38.5	24.8	31.65	21.5	43.2928	47.4489	25.6387	7.43584	14.6612
						2015	8	20	232	37.1	28.3	32.7	24	53.7167	37.8165	25.4959	7.55144	11.6308
						2015	8	21	233	37.1	22.4	29.75	21	40.707	47.8714	24.9717	6.96412	14.5622
						2015	8	22	234	37.1	23.4	30.25	25	41.7607	45.7697	24.7314	6.96962	13.4606
						2015	8	23	235	37.1	24.2	30.65	31	42.1931	43.5433	24.2469	6.88999	12.0761
						2015	8	24	236	37.1	23.2	30.15	42.5	40.294	44.8069	24.0363	6.75965	10.7483
						2015	8	25	237	36.8	27.1	31.95	25.5	47.7846	37.0809	23.8119	6.94792	11.1556
						2015	8	26	238	33.8	22.1	27.95	26.5	40.2837	37.7056	22.0466	5.91564	10.7233
						2015	8	27	239	35.1	22.9	29	27.5	38.5056	37.5815	21.5191	5.9066	10.711
						2015	8	28	240	35.2	23.1	29.15	26	43.0977	41.7186	23.9865	6.60496	12.0409
						2015	8	29	241	35.2	22.9	29.05	28.5	39.3173	38.6882	22.0626	6.06225	10.8972
						2015	8	30	242	35.3	22.6	28.95	23.5	40.606	41.2557	23.1533	6.34837	12.2019
						2015	8	31	243	37.1	24.7	30.9	29	42.1897	41.8522	23.7704	6.78944	11.9215
						2015	9	1	244	37.8	24.7	31.25	27	41.4129	43.4007	23.9823	6.89919	12.6592
						2015	9	2	245	37.8	24.8	31.3	24	41.0616	42.7041	23.688	6.82146	12.8742
						2015	9	3	246	37.8	25.6	31.7	21.5	41.9887	40.9809	23.4656	6.81248	12.7534
						2015	9	4	247	37.8	24.8	31.3	27	39.7015	41.2895	22.9033	6.5955	12.078
						2015	9	5	248	37.8	23.3	30.55	26	37.1899	43.1402	22.6584	6.4253	12.6283
						2015	9	6	249	37.8	28.3	33.05	50.5	47.1617	35.8429	23.2579	6.93634	8.08827
						2015	9	7	250	37.8	26.4	32.1	32	44.1028	40.2217	23.8253	6.97279	11.2381
						2015	9	8	251	37.8	25.6	31.7	26	42.2015	41.1886	23.5845	6.847	12.2295
						2015	9	9	252	37.8	27.2	32.5	23.5	45.4112	38.5087	23.6557	6.97866	11.8712
						2015	9	10	253	37.8	28.9	33.35	20.5	44.9993	32.0395	21.4793	6.44368	10.3733
						2015	9	11	254	37.8	28.9	33.35	20.5	41.6633	29.6643	19.887	5.96599	9.65136
						2015	9	12	255	37.8	26.1	31.95	19	38.6205	36.1488	21.1364	6.16726	11.6392
						2015	9	13	256	35.8	24	29.9	23.5	39.7691	37.542	21.8578	6.11495	11.2788
						2015	9	14	257	37.8	23.4	30.6	24	35.841	41.2888	21.7611	6.17724	12.3757
						2015	9	15	258	36.6	23.5	30.05	24	26.5419	27.8159	15.3705	4.31357	8.48089
						2015	9	16	259	37.8	23	30.4	21.5	30.9257	36.616	19.0358	5.38128	11.3057
						2015	9	17	260	37.8	24.9	31.35	23	34.2754	35.3723	19.6969	5.67792	10.8847
						2015	9	18	261	36.5	22.5	29.5	22.5	34.0379	38.1224	20.3773	5.65296	11.5104
						2015	9	19	262	35.1	24	29.55	24	40.5028	35.9665	21.5907	5.9959	10.7318
						2015	9	20	263	35.1	23.8	29.45	22.5	40.0159	36.1743	21.5224	5.96432	10.9465
						2015	9	21	264	35.5	23.4	29.45	26.5	35.6221	34.4822	19.8259	5.49417	10.0332
						2015	9	22	265	32.8	19.8	26.3	33	38.5257	40.0667	22.225	5.74842	10.3432
						2015	9	23	266	34.8	20.4	27.6	29.5	35.6141	41.0274	21.6233	5.75767	11.196
						2015	9	24	267	35.3	21.4	28.35	27	36.3339	40.4033	21.674	5.8665	11.4454
						2015	9	25	268	34	21.4	27.7	27	32.1443	32.4015	18.2562	4.87179	9.21531
						2015	9	26	269	33.3	19	26.15	31	32.706	37.4156	19.7886	5.10084	9.89497
						2015	9	27	270	32.9	19.6	26.25	33.5	35.7509	38.039	20.8609	5.38948	9.78235
						2015	9	28	271	34	20.3	27.15	26.5	35.2456	38.6292	20.873	5.50279	10.8604
						2015	9	29	272	32.5	20.6	26.55	34	36.8988	35.1276	20.366	5.29745	9.05742
						2015	9	30	273	32	18.7	25.35	49.5	33.4425	35.5828	19.5139	4.93848	7.38951
						2015	10	1	274	32.4	20	26.2	49	34.649	34.3718	19.5219	5.03782	7.29062
						2015	10	2	275	31.2	20.4	25.8	61.5	33.7874	29.1923	17.7659	4.54298	6.13225
						2015	10	3	276	32.1	21.1	26.6	47.5	32.9241	28.9732	17.4715	4.54969	6.3773
						2015	10	4	277	33	21.1	27.05	42	22.8367	21.7406	12.6045	3.31557	5.29534
						2015	10	5	278	32.4	19.6	26	57	35.9868	36.8505	20.6	5.29188	7.65513
						2015	10	6	279	29.9	20	24.95	67.5	39.2079	31.0526	19.7384	4.94897	6.41656
						2015	10	7	280	25.4	17.2	21.3	66	41.0841	26.9511	18.8235	4.31663	5.28261
						2015	10	8	281	26.8	15.6	21.2	63	31.9087	28.5902	17.0859	3.90814	5.56989
						2015	10	9	282	27.1	16.6	21.85	59	25.7474	21.6278	13.349	3.10427	4.35964
						2015	10	10	283	28.7	16.3	22.5	51.5	31.4795	31.2277	17.7361	4.1921	6.19709
						2015	10	11	284	29.6	16.3	22.95	47.5	27.1122	28.8474	15.8202	3.781	6.00698
						2015	10	12	285	31.1	17.6	24.35	53.5	32.5593	35.164	19.1409	4.73181	7.14643
						2015	10	13	286	29.3	18.2	23.75	57.5	34.8012	30.9034	18.5513	4.52079	6.26875
						2015	10	14	287	29.5	16.8	23.15	56.5	28.1939	28.645	16.076	3.861	5.78165
						2015	10	15	288	29.8	16.7	23.25	53	31.4671	32.9775	18.2227	4.38726	6.60781
						2015	10	16	289	30.5	17.7	24.1	43	32.8672	33.656	18.8143	4.62349	7.51315
						2015	10	17	290	30.7	18.5	24.6	42.5	33.4889	32.6852	18.7155	4.65409	7.41437
						2015	10	18	291	30.7	16.7	23.7	42	30.4962	34.1557	18.257	4.44371	7.66747
						2015	10	19	292	30.4	16.7	23.55	42	21.1126	23.1394	12.5032	3.03225	5.32392
						2015	10	20	293	28.3	18.8	23.55	46.5	35.3857	26.8931	17.4506	4.23208	5.76319
						2015	10	21	294	28.7	16.8	22.75	47	30.9248	29.4405	17.0687	4.05938	6.14301
						2015	10	22	295	28.5	17.6	23.05	71.5	32.4344	28.2828	17.1332	4.10486	5.70377
						2015	10	23	296	23	16	19.5	68	39.7751	22.2741	16.8376	3.68347	4.26901
						2015	10	24	297	27.9	17.4	22.65	74.5	27.6654	23.239	14.3434	3.40282	4.7237
						2015	10	25	298	22.3	15.3	18.8	76.5	26.463	14.8193	11.2023	2.40468	2.9156
						2015	10	26	299	25.3	15.6	20.45	84.5	32.6857	25.3641	16.2878	3.65395	4.9096
						2015	10	27	300	18.3	14.3	16.3	75.5	52.5966	16.8309	16.8309	3.36612	3.05455
						2015	10	28	301	21	13.9	17.45	84.5	11.2391	6.38381	4.7916	0.990622	1.41261
						2015	10	29	302	21.1	13.6	17.35	75.5	22.2652	13.3591	9.75613	2.01127	2.56857
						2015	10	30	303	21.9	13.7	17.8	70	29.8172	19.5601	13.6613	2.85241	3.64223
						2015	10	31	304	22.9	12.7	17.8	58	16.8308	13.7339	8.60052	1.79574	2.66209
						2015	11	1	305	22.3	13.5	17.9	51.5	26.2157	18.4558	12.4429	2.60531	3.46532
						2015	11	2	306	21.1	11.8	16.45	55	25.9311	19.2928	12.6527	2.54163	3.46714
						2015	11	3	307	20.9	11.4	16.15	57.5	14.121	10.732	6.96382	1.38661	2.06078
						2015	11	4	308	21.6	9.6	15.6	57.5	21.7631	20.8926	12.0623	2.3629	3.63215
						2015	11	5	309	20	11.6	15.8	59	21.8215	14.664	10.1191	1.99412	2.66433
						2015	11	6	310	22.5	11.7	17.1	65	20.9687	18.117	11.0256	2.25682	3.33698
						2015	11	7	311	24.2	12.1	18.15	65.5	22.1123	21.4047	12.3068	2.59486	3.98772
						2015	11	8	312	24.2	11.8	18	64.5	22.8568	22.674	12.878	2.70395	4.18736
						2015	11	9	313	20.1	11.1	15.6	65	26.6825	19.2114	12.8076	2.5089	3.36646
						2015	11	10	314	17.9	7.4	12.65	64	27.487	23.0891	14.2509	2.54505	3.57105
						2015	11	11	315	19.2	10.2	14.7	61.5	30.3348	21.8411	14.5607	2.77545	3.67185
						2015	11	12	316	22.3	12.2	17.25	62	27.2083	21.9843	13.8351	2.84406	3.99186
						2015	11	13	317	22.2	10.2	16.2	52.5	21.2736	20.4226	11.791	2.35125	3.62367
						2015	11	14	318	22.1	11.4	16.75	49.5	21.1257	18.0836	11.0566	2.24046	3.32282
						2015	11	15	319	19.1	8.6	13.85	69	25.0287	21.0241	12.9764	2.40876	3.43987
						2015	11	16	320	18	9.2	13.6	87.5	26.2263	18.4633	12.448	2.29243	3.02981
						2015	11	17	321	16.8	9.4	13.1	71.5	28.0023	16.5774	12.1879	2.2088	2.6978
						2015	11	18	322	17.5	7.8	12.65	68	19.9899	15.5121	9.96129	1.77898	2.49645
						2015	11	19	323	18.7	6.8	12.75	69	12.9416	12.3204	7.14302	1.27986	2.05251
						2015	11	20	324	20	7.2	13.6	65.5	11.1296	11.3967	6.37094	1.17328	1.98811
						2015	11	21	325	18.3	7.5	12.9	68.5	17.7063	15.2982	9.31021	1.67636	2.49231
						2015	11	22	326	19	6.9	12.95	68.5	22.092	21.3851	12.2955	2.21749	3.37176
						2015	11	23	327	23.4	7.8	15.6	65	10.5452	13.1604	6.66403	1.30542	2.41016
						2015	11	24	328	24.3	10	17.15	72.5	20.1175	23.0145	12.172	2.49504	4.15141
						2015	11	25	329	19.1	8.2	13.65	60.5	16.9575	14.7869	8.95767	1.65228	2.49266
						2015	11	26	330	17	8.7	12.85	60	24.0081	15.9414	11.0667	1.98937	2.5791
						2015	11	27	331	19.3	10.6	14.95	69	21.5839	15.0224	10.1861	1.95654	2.64799
						2015	11	28	332	19.6	10.5	15.05	82.5	6.80889	4.95688	3.28638	0.633171	1.09408
						2015	11	29	333	18.5	9.2	13.85	77.5	6.12431	4.55649	2.98826	0.554703	0.98914
						2015	11	30	334	15.4	8	11.7	77	13.8362	8.19103	6.02216	1.04194	1.3966
						2015	12	1	335	15.9	8.3	12.1	68	41.3128	25.1182	18.2227	3.19559	3.76598
						2015	12	2	336	14.4	5.6	10	70	39.6393	27.9061	18.8143	3.06761	3.71952
						2015	12	3	337	9.9	4.5	7.2	62.5	50.3366	21.7454	18.7155	2.74416	2.39643
						2015	12	4	338	10	2.7	6.35	63.5	42.2326	24.6638	18.257	2.58592	2.46674
						2015	12	5	339	10.1	0.8	5.45	50.5	25.6248	19.0648	12.5032	1.70495	1.74773
						2015	12	6	340	13.9	2.8	8.35	51	32.7362	29.0698	17.4506	2.67639	3.45426
						2015	12	7	341	15.5	3.4	9.45	59.5	30.6682	29.6868	17.0687	2.72794	3.80737
						2015	12	8	342	18.8	4.6	11.7	61.5	28.4168	32.2814	17.1332	2.96434	4.66911
						2015	12	9	343	20	6.8	13.4	64	28.965	30.587	16.8376	3.08108	4.77959
						2015	12	10	344	14.7	4.6	9.65	65.5	28.208	22.792	14.3434	2.30921	3.01966
						2015	12	11	345	15.1	4.9	10	66	21.9224	17.8887	11.2023	1.8265	2.47735
						2015	12	12	346	13.9	3.7	8.8	77.5	31.8745	26.0096	16.2878	2.54105	3.22083
						2015	12	13	347	15	3	9	66.5	30.3666	29.152	16.8309	2.64551	3.63188
						2015	12	14	348	16.1	7.5	11.8	64	10.212	7.02587	4.7916	0.831841	1.24425
						2015	12	15	349	17.3	6.1	11.7	75	18.22	16.3251	9.75613	1.68798	2.50156
						2015	12	16	350	11.5	4	7.75	81.5	31.1776	18.7066	13.6613	2.04716	2.19621
						2015	12	17	351	11.5	7.4	9.45	76.5	26.5468	8.70736	8.60052	1.37455	1.2937
						2015	12	18	352	13.4	7.1	10.25	71.5	30.9836	15.6157	12.4429	2.04703	2.22812
						2015	12	19	353	14.8	4.5	9.65	65	24.6402	20.3035	12.6527	2.03701	2.71766
						2015	12	20	354	15.5	5.6	10.55	63	13.8328	10.9556	6.96382	1.15789	1.66988
						2015	12	21	355	16.2	3.7	9.95	59.5	21.3234	21.3234	12.0623	1.96319	2.89453
						2015	12	22	356	15.6	4.2	9.9	67	18.7314	17.0831	10.1191	1.64396	2.36314
						2015	12	23	357	15.3	4.1	9.7	63	20.5909	18.4494	11.0256	1.7783	2.50049
						2015	12	24	358	15.8	5.8	10.8	54.5	24.3235	19.4588	12.3068	2.06434	2.79634
						2015	12	25	359	18.5	5.8	12.15	60	22.5853	22.9466	12.878	2.2621	3.47331
						2015	12	26	360	15.1	5.4	10.25	63	25.7017	19.9445	12.8076	2.10702	2.77286
						2015	12	27	361	16.3	5.3	10.8	62	26.855	23.6324	14.2509	2.39043	3.33793
						2015	12	28	362	18	5.6	11.8	73	25.8435	25.6368	14.5607	2.5278	3.7845
						2015	12	29	363	12.2	4.7	8.45	83.5	31.5742	18.9445	13.8351	2.13	2.34967
						2015	12	30	364	10.5	4.5	7.5	94.5	30.0854	14.441	11.791	1.7496	1.7082
						2015	12	31	365	6	0.5	3.25	95.5	29.466	12.965	11.0566	1.36503	0.83112
																	1564.27	2527.73
																	ETo-HS	ETo-TURC (Ousman Couly (2016)

## Sheet: 2016
	DİYARBAKIR					year	month	day	DOY	Tmax	Tmin	Tmean	RHmean.	Ra	Rs=0.16(Tmax-Tmin)^0.5*Ra	Rs=from meteorological station	ETo-HS	ETo-TURC (Ousman Couly (2016)
	DOY	246					#	#		°C	°C	°C	%	MJ m-2 day-1*(0.408 mm day-1)
	φ (-)	37.89	0.661305			2016	1	1	1	2.4	-1.1	0.65	96	29.7324	8.32508	8.89989	0.96305	0.134098
	tan(φ)		0.778198			2016	1	2	2	2.2	-4.7	-1.25	75	4.95125	2.73309	2.08094	0.201988	-0.135923
	sin(φ)		0.614147			2016	1	3	3	1	-6.2	-2.6	77	11.3675	6.5477	4.88037	0.435075	-0.56145
	cos(φ)		0.789191			2016	1	4	4	-0.7	-1.7	-1.2	78.5	23.3975	1.8718	3.7436	0.364473	-0.106796
	dr	0.984766		(1+0.033*cos(2*3.14/365*DOY))		2016	1	5	5	2.4	-0.8	0.8	91.5	4.17213	1.06806	1.19413	0.130267	0.0495696
	δ	0.120494		(0.409*sin(2*3.14/365*DOY-1.39))		2016	1	6	6	5.1	2.2	3.65	97.5	39.3022	9.1181	10.7087	1.3472	0.679998
	tan(δ)	0.121081				2016	1	7	7	9.9	4.3	7.1	97	22.5612	10.1074	8.54232	1.24751	1.21477
	sin(δ)	0.120203				2016	1	8	8	11.8	5.6	8.7	82	6.13342	3.04217	2.44353	0.37978	0.584028
	cos(δ)	0.992749				2016	1	9	9	12.5	3.7	8.1	79.5	5.62193	3.95784	2.66838	0.405336	0.657408
	X	0.991122				2016	1	10	10	12.5	1.7	7.1	75	19.7934	17.1015	10.4076	1.51991	1.91133		-
	ωs (eq. 25)	1.49064		(acos{(-1*tan(-0.35)*tan(0.409*sin(2*3.14/365*DOY-1.39))))		2016	1	11	11	7.9	3	5.45	81	30.3597	11.901	10.7526	1.46624	1.15588
	sin ωs	0.996789				2016	1	12	12	11.3	3.1	7.2	78.5	21.4527	14.073	9.82898	1.44117	1.62503
	sin φ*sin δ	-0.0738224		(sin(0.35)*sin(0.409*sin(2*3.14/365*DOY-1.39)))		2016	1	13	13	8.9	6.7	7.8	86.5	46.1646	8.12497	10.9557	1.64493	1.08332
	cos φ*cos δ	0.783469		(cos(0.35)*cos(0.409*sin(2*3.14/365*DOY-1.39))		2016	1	14	14	8.1	4.4	6.25	76	13.8657	4.10424	4.26739	0.601929	0.564769
	Gsc	0.082				2016	1	15	15	13.5	3.6	8.55	79	11.4525	9.07036	5.7655	0.891016	1.25607
						2016	1	16	16	13.3	3	8.15	77	20.1743	16.6236	10.3595	1.57668	2.04233
	Ra	24.8453				2016	1	17	17	13.3	3.1	8.2	76	18.7448	15.2958	9.5786	1.46064	1.90494
						2016	1	18	18	11.7	5.8	8.75	70.5	29.0938	13.7323	11.307	1.76068	1.80707
						2016	1	19	19	10.4	3.2	6.8	77.5	28.7134	16.5389	12.3274	1.77858	1.80136
						2016	1	20	20	9.4	2.9	6.15	79	23.384	12.1597	9.53882	1.33989	1.28449
						2016	1	21	21	9.6	4	6.8	85	29.6739	13.2939	11.2354	1.62103	1.48758
						2016	1	22	22	12.9	5.6	9.25	84	32.7408	19.1206	14.1537	2.24547	2.5081
						2016	1	23	23	11.9	6.2	9.05	78	37.3591	17.0357	14.271	2.24732	2.23107
						2016	1	24	24	10.4	3.4	6.9	73	29.9297	16.7607	12.6699	1.83543	1.84117
						2016	1	25	25	3.8	-1.6	1.1	76	16.572	7.15912	6.16159	0.683003	0.195898
						2016	1	26	26	3.3	-4.4	-0.55	68.5	7.47844	4.60672	3.32029	0.335918	-0.0790166
						2016	1	27	27	4.2	-3.6	0.3	66.5	12.8462	8.016	5.74038	0.609378	0.0614286
						2016	1	28	28	6.6	-3.1	1.75	56	30.57	23.7223	15.2336	1.74669	0.836011
						2016	1	29	29	10.7	-1.9	4.4	60.5	27.8876	28.1107	15.8386	2.06223	2.12339
						2016	1	30	30	13.5	2.4	7.95	67.5	19.9977	17.758	10.6601	1.60993	2.13138
						2016	1	31	31	13.7	6.5	10.1	71	14.3303	8.25428	6.15238	1.00674	1.29036
						2016	2	1	32	12.6	4.1	8.35	71.5	33.3254	22.6613	15.5455	2.38421	2.74384
						2016	2	2	33	12.9	5.7	9.3	85.5	38.0143	21.8963	16.3205	2.59401	2.84578
						2016	2	3	34	14.6	2.1	8.35	67	28.9685	28.9685	16.3871	2.51328	3.44304
						2016	2	4	35	16	3.1	9.55	67.5	19.7057	20.3362	11.3242	1.81648	2.7044
						2016	2	5	36	14.2	4	9.1	66	12.9306	10.5513	6.6075	1.04246	1.47972
						2016	2	6	37	10.6	6.2	8.4	64	20.8116	7.32567	6.98475	1.0733	1.0478
						2016	2	7	38	9.4	5.6	7.5	80	30.2825	9.20588	9.44503	1.4015	1.16724
						2016	2	8	39	12.5	3.5	8	72.5	23.2073	16.7093	11.1395	1.6856	2.02705
						2016	2	9	40	13.5	3.7	8.6	69.5	18.1623	14.2392	9.09709	1.40856	1.84465
						2016	2	10	41	13.1	3.3	8.2	66	27.6049	21.6423	13.8267	2.10844	2.60032
						2016	2	11	42	11.7	2.6	7.15	64.5	29.6949	21.6179	14.3325	2.0973	2.37239
						2016	2	12	43	13.1	7.1	10.1	60.5	17.1414	8.22789	6.71804	1.0993	1.28706
						2016	2	13	44	15.4	7	11.2	66.5	25.0241	16.8162	11.6043	1.97371	2.50543
						2016	2	14	45	17.3	8.7	13	75.5	17.4775	12.0245	8.20066	1.48138	2.03148
						2016	2	15	46	20.5	8.3	14.4	80	29.3061	28.6027	16.3779	3.09301	4.66028
						2016	2	16	47	23.3	10.1	16.7	66.5	32.3834	34.1969	18.8248	3.80905	5.92609
						2016	2	17	48	24	10.7	17.35	58.5	32.4279	34.5033	18.9219	3.90084	6.08399
						2016	2	18	49	25.5	11.8	18.65	60	31.4603	34.4805	18.6313	3.98299	6.28328
						2016	2	19	50	22.5	11.1	16.8	62.5	33.9349	30.9486	18.3324	3.72017	5.41085
						2016	2	20	51	22	10.9	16.45	62.5	32.4519	28.8173	17.299	3.47496	5.0115
						2016	2	21	52	16.3	8.7	12.5	69	39.8614	24.2358	17.5825	3.12457	3.70954
						2016	2	22	53	16.6	9.9	13.25	65	42.1986	22.6184	17.4765	3.18262	3.59256
						2016	2	23	54	12.6	9.3	10.95	79	61.442	16.2207	17.8584	3.01126	2.39521
						2016	2	24	55	18	7.9	12.95	74	27.2075	21.9837	13.8347	2.49507	3.45774
						2016	2	25	56	18.2	6.8	12.5	78	35.3695	32.257	19.1074	3.39556	4.8398
						2016	2	26	57	20.5	8.3	14.4	69.5	30.0141	29.2937	16.7735	3.16773	4.7652
						2016	2	27	58	18.6	9.4	14	64.5	28.7152	21.1344	13.9356	2.59909	3.47565
						2016	2	28	59	20.9	9.6	15.25	71.5	24.5001	22.1481	13.1773	2.55427	3.78795
						2016	3	1	60	15.6	12	13.8	91	26.7057	7.69125	8.10729	1.50256	1.45292
						2016	3	2	61	23.6	11	17.3	61.5	17.9314	18.0749	10.184	2.0965	3.34812
						2016	3	3	62	22.5	10	16.25	60	3.41956	3.41956	1.93439	0.386305	0.888141
						2016	3	4	63	17.4	11.5	14.45	55	33.4884	15.8065	13.0149	2.46171	2.72215
						2016	3	5	64	19.3	10.7	15	67	43.0709	29.6328	20.2094	3.88772	4.91703
						2016	3	6	65	18.8	7.3	13.05	65.5	37.9031	34.8709	20.5657	3.72106	5.33066
						2016	3	7	66	18.2	4.7	11.45	75.5	30.7595	33.2203	18.0828	3.10213	4.73852
						2016	3	8	67	19.6	7	13.3	66.5	32.4576	32.7173	18.4341	3.36241	5.07104
						2016	3	9	68	20.6	8.4	14.5	64	30.1751	29.4509	16.8636	3.19462	4.80598
						2016	3	10	69	21.7	9.3	15.5	59	14.9513	14.8317	8.42383	1.64521	2.66586
						2016	3	11	70	22.1	11.9	17	64.5	9.81284	8.00728	5.01435	1.02344	1.6629
						2016	3	12	71	20.8	10.6	15.7	75	16.6849	13.6149	8.52599	1.67516	2.48977
						2016	3	13	72	22.3	8.9	15.6	69	19.1265	20.5036	11.2023	2.19443	3.57068
						2016	3	14	73	23.6	10.6	17.1	59	24.772	25.7628	14.2906	2.92513	4.59962
						2016	3	15	74	17.6	10.8	14.2	68	28.3677	15.432	11.8358	2.22135	2.6415
						2016	3	16	75	18.9	9.6	14.25	77	23.9223	17.7982	11.6725	2.19412	3.00363
						2016	3	17	76	14.2	9.3	11.75	76	10.3559	4.05952	3.66781	0.635671	0.83737
						2016	3	18	77	15	5.5	10.25	63.5	38.4643	29.2329	18.9688	3.12062	3.94172
						2016	3	19	78	17	2.7	9.85	57	39.8953	45.6402	24.1385	3.91447	5.86496
						2016	3	20	79	16.2	4.4	10.3	59.5	32.9312	31.087	18.0996	2.98293	4.18712
						2016	3	21	80	18.8	8.2	13.5	69.5	35.8287	30.3827	18.664	3.42623	4.76837
						2016	3	22	81	17.2	6.8	12	68	29.2044	24.2981	15.069	2.63372	3.63569
						2016	3	23	82	19.5	7.9	13.7	58.5	44.6552	41.44	24.3344	4.49572	6.44153
						2016	3	24	83	21.7	7.7	14.7	60.5	40.838	45.7386	24.4483	4.66015	7.33855
						2016	3	25	84	24.5	10.9	17.7	62.5	40.8573	44.4528	24.1079	5.01945	7.80979
						2016	3	26	85	20.4	11.1	15.75	50.5	46.9977	34.9663	22.9318	4.5123	5.88381
						2016	3	27	86	21.2	10.1	15.65	58	36.5551	32.4609	19.4863	3.8229	5.46897
						2016	3	28	87	20.9	8.5	14.7	69	27.989	27.7651	15.7695	3.00586	4.58079
						2016	3	29	88	18.1	9.8	13.95	80	47.3921	31.4684	21.8457	4.06796	5.01289
						2016	3	30	89	16.3	7.3	11.8	82.5	32.6132	23.4815	15.6544	2.71766	3.49032
						2016	3	31	90	19.5	6	12.75	68.5	17.3961	18.7877	10.2267	1.83239	2.97367
						2016	4	1	91	20.8	9.7	15.25	60.5	26.5398	23.5673	14.1475	2.74232	4.00975
						2016	4	2	92	23.1	7.4	15.25	59	26.9988	33.9105	17.1165	3.31782	5.62619
						2016	4	3	93	25.4	9.6	17.5	52	41.8129	52.8515	26.5925	5.50556	9.171
						2016	4	4	94	27.9	11	19.45	61	39.0765	52.8315	25.7027	5.61531	9.61245
						2016	4	5	95	25.8	11.8	18.8	61.5	43.9202	49.1907	26.2935	5.64414	8.84212
						2016	4	6	96	26.6	12	19.3	60	39.621	46.2773	24.2226	5.27064	8.43678
						2016	4	7	97	28.5	13.1	20.8	60.5	39.6351	48.8304	24.8863	5.63398	9.17136
						2016	4	8	98	29.3	15.3	22.3	56.5	15.4306	17.2823	9.23778	2.1726	3.59037
						2016	4	9	99	28.9	13.8	21.35	61	29.4863	35.6194	18.3328	4.20948	6.86602
						2016	4	10	100	29	16.5	22.75	60	44.8643	44.8643	25.3791	6.0358	8.77206
						2016	4	11	101	28.6	14.7	21.65	59	45.0073	50.0481	26.8479	6.21191	9.54774
						2016	4	12	102	22.4	14.3	18.35	80.5	37.4668	24.2785	17.0612	3.61731	4.49767
						2016	4	13	103	22.3	10.5	16.4	72	15.412	14.5489	8.47072	1.69908	2.69402
						2016	4	14	104	22.6	10.5	16.55	67.5	30.845	29.858	17.1671	3.45853	5.19521
						2016	4	15	105	25.1	11.7	18.4	73	28.6336	30.6953	16.7706	3.56062	5.59901
						2016	4	16	106	27.9	12.2	20.05	80	31.3266	39.3463	19.8602	4.40877	7.34799
						2016	4	17	107	28.9	14.4	21.65	54.5	40.5696	47.0608	24.7175	5.719	9.0007
						2016	4	18	108	28.3	16.2	22.25	56	40.6836	39.3817	22.6429	5.31866	7.67922
						2016	4	19	109	29.1	16.3	22.7	58	47.0154	48.1438	26.9132	6.39276	9.37653
						2016	4	20	110	30.3	15.4	22.85	54.5	45.7581	54.5436	28.2606	6.73767	10.5988
						2016	4	21	111	31	16.8	23.9	46.5	38.3411	43.5555	23.1168	5.6537	9.12845
						2016	4	22	112	30.4	15.9	23.15	56	42.9763	49.8525	26.1838	6.28861	9.77105
						2016	4	23	113	26.6	10.8	18.7	54.5	41.6641	52.6634	26.4978	5.67246	9.41857
						2016	4	24	114	29.7	13.1	21.4	55	43.6601	57.9806	28.4616	6.54354	10.948
						2016	4	25	115	30.8	15.8	23.3	56.5	47.6708	57.205	29.5405	7.12079	11.1825
						2016	4	26	116	32.7	18	25.35	48	46.643	54.8522	28.6131	7.24126	11.4068
						2016	4	27	117	29.7	14.6	22.15	65.5	36.393	43.9627	22.627	5.30165	8.51201
						2016	4	28	118	31	18.3	24.65	60.5	24.0319	24.4164	13.7028	3.41157	5.10841
						2016	4	29	119	28.6	13.2	20.9	59	40.1445	49.4581	25.2062	5.72118	9.30306
						2016	4	30	120	28.9	15.7	22.3	59	38.8104	40.9838	22.5608	5.306	7.98308
						2016	5	1	121	30.3	16	23.15	58	23.3105	26.6672	14.1039	3.38736	5.4096
						2016	5	2	122	29.7	17.6	23.65	72.5	19.3296	18.711	10.7581	2.61533	3.94573
						2016	5	3	123	32.7	19.8	26.25	68	22.3264	23.0409	12.8302	3.31473	4.95764
						2016	5	4	124	29.3	18.2	23.75	63.5	41.2498	36.6298	21.9889	5.35848	7.35676
						2016	5	5	125	28.4	18.1	23.25	54.5	37.9873	31.3015	19.5064	4.69633	6.29201
						2016	5	6	126	26.2	14.2	20.2	66.5	45.5364	43.7149	25.2388	5.62498	8.14859
						2016	5	7	127	23.3	13.7	18.5	60	51.4796	39.5363	25.5206	5.43332	7.12618
						2016	5	8	128	22.9	10.7	16.8	54	45.274	44.1874	25.3016	5.13443	7.57901
						2016	5	9	129	25.8	10.7	18.25	54.5	35.3115	42.6563	21.9545	4.64192	7.61359
						2016	5	10	130	29.1	15.3	22.2	58.5	47.1009	51.9994	27.9955	6.56775	10.0065
						2016	5	11	131	31.6	16.9	24.25	58.5	48.7172	57.2915	29.8855	7.37047	11.3733
						2016	5	12	132	30.6	16.1	23.35	56	50.5104	58.592	30.774	7.42715	11.4536
						2016	5	13	133	30.4	15.9	23.15	62.5	46.6468	54.1103	28.4201	6.82571	10.572
						2016	5	14	134	32.7	17.2	24.95	57.5	42.4263	52.6086	26.7252	6.70078	10.5899
						2016	5	15	135	33.8	17.6	25.7	53.5	45.7998	59.3565	29.4945	7.52485	12.0281
						2016	5	16	136	35	23.5	29.25	57	55.9232	51.4494	30.3432	8.37315	10.971
						2016	5	17	137	34.8	21	27.9	52	49.3854	54.5215	29.3534	7.8676	11.4134
						2016	5	18	138	34.9	22.3	28.6	53	39.4848	39.8007	22.4252	6.10269	8.51842
						2016	5	19	139	30.8	19.9	25.35	52.5	43.0374	37.5286	22.7342	5.75344	7.71605
						2016	5	20	140	28.6	16.2	22.4	50.5	24.2844	24.0901	13.6823	3.22591	4.86083
						2016	5	21	141	30.2	17.4	23.8	49.5	51.9863	53.234	29.7587	7.26064	10.5952
						2016	5	22	142	31.9	17.2	24.55	45.5	35.0782	41.2519	21.5187	5.34487	8.87632
						2016	5	23	143	34.2	18.8	26.5	52.5	30.6514	37.7625	19.2455	5.00037	7.88887
						2016	5	24	144	29.8	20.6	25.2	54.5	58.4243	43.0003	28.3535	7.15062	8.76231
						2016	5	25	145	28.8	14.8	21.8	51	40.4324	45.2843	24.2055	5.62182	8.69987
						2016	5	26	146	29.9	17.6	23.75	61.5	44.8597	44.142	25.1727	6.13435	8.78407
						2016	5	27	147	29	15.8	22.4	56.5	53.6537	56.6583	31.1894	7.35361	10.9077
						2016	5	28	148	30.1	18.2	24.15	60.5	54.6347	52.0122	30.1552	7.41929	10.3458
						2016	5	29	149	28.9	16.6	22.75	60	56.3655	55.4636	31.629	7.52219	10.7522
						2016	5	30	150	27.3	13.4	20.35	52	51.9554	57.7744	30.9926	6.93458	10.6833
						2016	5	31	151	29.8	15.8	22.8	49.5	50.8617	56.9651	30.4491	7.25051	11.1212
						2016	6	1	152	32.7	18.5	25.6	48.5	50.4529	57.3145	30.4194	7.74298	11.8605
						2016	6	2	153	33.8	21.3	27.55	48.5	53.6382	53.6382	30.3424	8.07039	11.4253
						2016	6	3	154	34.2	22.6	28.4	29	56.3962	52.3357	30.7326	8.32739	14.3528
						2016	6	4	155	36.8	22.8	29.8	28.5	49.3629	55.2864	29.5518	8.25011	15.4652
						2016	6	5	156	35.7	20.1	27.9	46.5	46.1886	57.6433	29.1888	7.8235	12.6449
						2016	6	6	157	35.5	20.3	27.9	33	48.706	59.2265	30.3825	8.14345	15.3641
						2016	6	7	158	35.7	20.7	28.2	39	49.3208	59.185	30.563	8.24559	14.3482
						2016	6	8	159	31.7	19.7	25.7	58	55.369	53.1542	30.6886	7.82951	10.814
						2016	6	9	160	33.6	19.9	26.75	55	49.6021	54.3639	29.3752	7.67531	11.213
						2016	6	10	161	31	19	25	45	54.2532	52.0831	30.0702	7.54828	11.2458
						2016	6	11	162	31.4	18.9	25.15	39	53.055	53.055	30.0124	7.56018	12.391
						2016	6	12	163	32.3	19.7	26	34.5	53.8761	54.3071	30.5986	7.86038	13.5418
						2016	6	13	164	34.3	19.9	27.1	36.5	49.4483	56.9644	30.0229	7.90618	14.0569
						2016	6	14	165	36.3	21.6	28.95	38	34.9314	41.0793	21.4286	5.87549	10.3262
						2016	6	15	166	37.8	21.9	29.85	34.5	46.4247	59.0523	29.6188	8.2775	15.4082
						2016	6	16	167	35.7	24.4	30.05	32.5	57.1174	51.6341	30.7204	8.62139	13.8864
						2016	6	17	168	33.4	21.9	27.65	28	54.7433	50.3639	29.703	7.91776	13.855
						2016	6	18	169	34.5	22.8	28.65	35.5	53.0914	49.6936	29.0561	7.91573	12.719
						2016	6	19	170	34.8	24.3	29.55	30.5	53.9297	45.301	27.9604	7.76481	12.4593
						2016	6	20	171	36.3	23.6	29.95	38	50.7821	51.5947	28.9556	8.10913	12.9896
						2016	6	21	172	36.6	25	30.8	33.5	44.2995	41.1099	24.1406	6.881	11.1288
						2016	6	22	173	36.8	27.3	32.05	35.5	63.002	47.8815	31.0696	9.08384	12.7383
						2016	6	23	174	37	27.9	32.45	33	64.3735	46.8639	31.0705	9.15697	12.8988
						2016	6	24	175	35.9	29.2	32.55	27	75.1214	40.2651	31.1115	9.18731	11.9413
						2016	6	25	176	36.5	31.2	33.85	27.5	84.1463	35.678	30.9951	9.38926	10.7207
						2016	6	26	177	36.7	28.5	32.6	35	66.4252	43.5749	30.434	8.99618	11.7727
						2016	6	27	178	35.8	27.9	31.85	32	68.5536	43.3259	30.8293	8.97741	12.0324
						2016	6	28	179	37.5	27.3	32.4	38	59.6472	48.6722	30.4797	8.97392	12.6004
						2016	6	29	180	36.5	22	29.25	31	49.0239	56.8677	29.8684	8.24213	15.3606
						2016	6	30	181	36.4	22.7	29.55	26	52.4089	57.4401	31.0374	8.61932	16.4376
						2016	7	1	182	36.5	23.9	30.2	29.5	53.7279	54.1578	30.5144	8.59042	15.0621
						2016	7	2	183	36	24.7	30.35	25.5	54.1747	48.974	29.1378	8.22849	14.3018
						2016	7	3	184	37	26.3	31.65	28.5	55.5073	47.5143	29.0511	8.42552	13.6372
						2016	7	4	185	36.5	26.4	31.45	27.5	60.0579	48.5268	30.5387	8.82115	14.039
						2016	7	5	186	37.4	26.8	32.1	23.5	57.0353	48.3659	29.711	8.69531	14.6956
						2016	7	6	187	37.3	28	32.65	25.5	59.9311	44.5887	29.2424	8.65252	13.3855
						2016	7	7	188	38.9	27.8	33.35	22	57.9179	51.4311	30.8741	9.26207	16.0219
						2016	7	8	189	35.8	27.1	31.45	24.5	65.378	45.5031	30.854	8.91222	13.6284
						2016	7	9	190	36.9	26.5	31.7	26	58.9792	49.0707	30.4324	8.83505	14.4567
						2016	7	10	191	36.1	25.7	30.9	24	58.2538	48.4672	30.0581	8.58535	14.4698
						2016	7	11	192	36.9	26.5	31.7	32.5	58.3715	48.5651	30.1188	8.744	13.3241
						2016	7	12	193	35.2	24.4	29.8	28	58.6443	50.6687	30.836	8.60861	14.2983
						2016	7	13	194	36.3	23	29.65	26.5	52.6537	56.0235	30.7238	8.55025	15.9792
						2016	7	14	195	36.8	26.1	31.45	28	57.7209	49.4091	30.2096	8.72609	14.2065
						2016	7	15	196	37.6	27.2	32.4	23.5	56.9936	47.4187	29.4078	8.65834	14.4624
						2016	7	16	197	35.6	25.6	30.6	22.5	58.0536	46.4429	29.3731	8.33801	14.0624
						2016	7	17	198	36.4	27.6	32	26.5	62.2091	43.7952	29.5267	8.62408	12.936
						2016	7	18	199	37.3	29.4	33.35	22.5	65.4234	41.3476	29.4216	8.82633	12.937
						2016	7	19	200	37.3	24.3	30.8	20.5	52.1147	54.1993	30.0643	8.56951	16.6801
						2016	7	20	201	36.7	23.3	30	29	48.9611	52.4863	28.6763	8.03933	14.6628
						2016	7	21	202	36.7	25.7	31.2	21.5	53.4039	46.9954	28.3393	8.14429	14.4599
						2016	7	22	203	36.3	20.9	28.6	25	45.0158	55.4595	28.2648	7.69186	15.8821
						2016	7	23	204	37.4	25.2	31.3	23	51.5456	50.3085	28.8066	8.29547	15.2166
						2016	7	24	205	36.2	28	32.1	25.5	64.7364	42.4671	29.6603	8.68048	12.7086
						2016	7	25	206	36.4	28.8	32.6	25	65.6646	39.9241	28.964	8.56164	12.1058
						2016	7	26	207	35.7	25.9	30.8	27	56.0441	43.9386	28.0713	8.00142	12.7485
						2016	7	27	208	36.2	27.4	31.8	30.5	58.3426	41.0732	27.6916	8.05559	11.6247
						2016	7	28	209	38.2	24.1	31.15	31	46.9951	53.0104	28.2346	8.10593	14.6587
						2016	7	29	210	36.4	27.5	31.95	30	58.9517	41.9736	28.1392	8.21055	11.9515
						2016	7	30	211	36.2	27.1	31.65	27	57.4163	41.799	27.7125	8.0373	12.2638
						2016	7	31	212	38.6	25.5	32.05	27.5	47.4269	49.7034	27.465	8.02996	14.4527
						2016	8	1	213	37.1	27.4	32.25	26	56.4196	43.7816	28.1149	8.25293	13.0336
						2016	8	2	214	36.6	27.7	32.15	27	57.2236	40.7432	27.3143	8.00191	12.0289
						2016	8	3	215	36.2	26.7	31.45	26	56.6929	43.0866	27.9583	8.07578	12.7333
						2016	8	4	216	36.9	27.3	32.1	26.5	53.4196	41.0263	26.4824	7.75042	12.1675
						2016	8	5	217	36.9	26.9	31.9	25.5	54.4365	43.5492	27.5429	8.0285	12.9913
						2016	8	6	218	37.6	24.8	31.2	26.5	46.9379	48.0644	26.8688	7.72169	14.0248
						2016	8	7	219	36.8	23.6	30.2	31.5	45.5672	48.119	26.4886	7.45708	13.1479
						2016	8	8	220	36.6	22.7	29.65	25.5	42.8279	47.6246	25.5478	7.10981	13.816
						2016	8	9	221	36.8	30.5	33.65	28	63.1756	31.8405	25.3711	7.65585	9.5619
						2016	8	10	222	37	28.8	32.9	24	58.7991	38.5722	26.94	8.01076	11.8737
						2016	8	11	223	37.7	30.6	34.15	21	61.1502	34.7333	26.0704	7.94329	11.2173
						2016	8	12	224	38	23.6	30.8	22	42.8522	49.3657	26.018	7.41615	15.0179
						2016	8	13	225	36.5	24	30.25	22.5	43.5335	43.5335	24.6263	6.94001	13.1693
						2016	8	14	226	37.4	25.6	31.5	22.5	44.2561	41.7778	24.324	7.03314	12.8313
						2016	8	15	227	36.5	24.7	30.6	22.5	43.7168	41.2686	24.0275	6.8206	12.5632
						2016	8	16	228	36	27.2	31.6	23.5	51.9656	36.5838	24.6648	7.14615	11.2075
						2016	8	17	229	36.7	27.3	32	28.5	49.678	37.3579	24.3696	7.1178	10.8833
						2016	8	18	230	36	21.2	28.6	25	41.71	49.3846	25.6738	6.98678	14.2056
						2016	8	19	231	36.7	23.5	30.1	25.5	44.1051	46.575	25.6387	7.20276	13.5926
						2016	8	20	232	36.9	28.2	32.55	24	54.0245	37.601	25.4959	7.52901	11.5512
						2016	8	21	233	36	27.5	31.75	26.5	53.5326	36.4022	24.9717	7.25704	10.8245
						2016	8	22	234	35.4	29.8	32.6	27.5	65.3182	29.2625	24.7314	7.31049	8.79607
						2016	8	23	235	36.4	29.7	33.05	27	58.5463	31.3808	24.2469	7.23129	9.4818
						2016	8	24	236	36.2	26.3	31.25	30.5	47.7453	37.8142	24.0363	6.91472	10.6867
						2016	8	25	237	35.6	29.1	32.35	33	58.3737	30.3543	23.8119	7.00378	8.54035
						2016	8	26	238	37.1	29.6	33.35	32.5	50.3144	30.1886	22.0466	6.61388	8.62752
						2016	8	27	239	38.8	27.6	33.2	24.5	40.1879	36.0083	21.5191	6.43668	11.0985
						2016	8	28	240	36.5	25.9	31.2	23.5	46.0462	39.0472	23.9865	6.89336	11.8724
						2016	8	29	241	36.5	24.4	30.45	23.5	39.6409	38.3724	22.0626	6.2434	11.585
						2016	8	30	242	36.6	24.2	30.4	21	41.0943	40.7655	23.1533	6.54527	12.5812
						2016	8	31	243	36.9	25.3	31.1	18.5	43.6203	40.4796	23.7704	6.81733	12.9089
						2016	9	1	244	37	26	31.5	19.5	45.1933	39.7701	23.9823	6.93435	12.6208
						2016	9	2	245	36.2	22.4	29.3	20.5	39.8536	43.9984	23.688	6.5436	13.4321
						2016	9	3	246	36.4	24.7	30.55	31	42.8765	40.1324	23.4656	6.65421	11.1614
						2016	9	4	247	36.1	21.6	28.85	47	37.5919	43.6066	22.9033	6.2664	9.71956
						2016	9	5	248	34.7	20.4	27.55	49.5	37.449	42.8417	22.6584	6.02662	9.08296
						2016	9	6	249	34.9	18.8	26.85	44	36.2275	46.661	23.2579	6.09061	10.5271
						2016	9	7	250	35.9	20.6	28.25	43	38.0691	46.5966	23.8253	6.43481	10.8442
						2016	9	8	251	36.1	24.2	30.15	26.5	42.7301	40.679	23.5845	6.6326	11.8259
						2016	9	9	252	36.1	24.2	30.15	24	42.8591	40.8018	23.6557	6.65262	12.177
						2016	9	10	253	36.6	24.2	30.4	30.5	38.1232	37.8182	21.4793	6.07205	10.5917
						2016	9	11	254	37.3	23.1	30.2	39.5	32.9841	37.47	19.887	5.59859	9.42289
						2016	9	12	255	36	23.5	29.75	42.5	37.3642	37.3642	21.1364	5.89453	9.00228
						2016	9	13	256	36.3	23.5	29.9	46.5	38.184	39.1004	21.8578	6.11495	8.92837
						2016	9	14	257	34.1	20.1	27.1	34.5	36.3494	40.7113	21.7611	5.73053	10.4321
						2016	9	15	258	33.3	18.6	25.95	29	25.0558	29.4656	15.3705	3.94397	8.05871
						2016	9	16	259	33.5	19.7	26.6	28	32.0266	35.3574	19.0358	4.95703	9.75576
						2016	9	17	260	31.8	21.2	26.5	28.5	37.8116	32.0642	19.6969	5.11764	8.83745
						2016	9	18	261	31.5	20.6	26.05	26.5	38.5756	33.638	20.3773	5.24064	9.38811
						2016	9	19	262	33.6	20.4	27	28	37.1415	39.2214	21.5907	5.673	10.8202
						2016	9	20	263	34.5	20.1	27.3	29	35.4479	40.836	21.5224	5.69293	11.1647
						2016	9	21	264	35.6	19.8	27.7	27.5	31.1734	39.4031	19.8259	5.29068	11.0264
						2016	9	22	265	31.4	20	25.7	23.5	41.1405	37.5201	22.225	5.67021	10.689
						2016	9	23	266	31.7	18.8	25.25	24.5	37.6277	38.8318	21.6233	5.45964	10.8572
						2016	9	24	267	28.2	16.8	22.5	22	40.1205	36.5899	21.674	5.12286	10.0723
						2016	9	25	268	26.2	14.7	20.45	22.5	33.6465	30.9548	18.2562	4.09552	8.23093
						2016	9	26	269	27.9	14.7	21.3	21.5	34.0415	35.9478	19.7886	4.53795	9.73617
						2016	9	27	270	30.1	15.4	22.75	21.5	34.0059	39.9909	20.8609	4.96126	11.0624
						2016	9	28	271	33.1	18.3	25.7	26	33.9105	40.1501	20.873	5.32528	11.1034
						2016	9	29	272	29.6	17.1	23.35	32.5	36.0023	36.0023	20.366	4.91522	8.98733
						2016	9	30	273	27.3	17.1	22.2	32	38.1878	31.1613	19.5139	4.57797	7.73329
						2016	10	1	274	27.8	17.2	22.5	37	37.4756	31.7793	19.5219	4.61418	7.46964
						2016	10	2	275	30.7	17.6	24.15	32.5	30.6783	32.1508	17.7659	4.37105	8.18467
						2016	10	3	276	31.9	17.5	24.7	33	28.7759	33.1499	17.4715	4.35499	8.44741
						2016	10	4	277	32.5	18.6	25.55	28.5	21.13	23.4966	12.6045	3.20468	6.53276
						2016	10	5	278	32.3	17.8	25.05	30.5	33.8115	39.2213	20.6	5.1771	10.2414
						2016	10	6	279	33	18.4	25.7	27.5	32.286	37.7101	19.7384	5.0358	10.295
						2016	10	7	280	33.8	19.3	26.55	28	30.8956	35.8389	18.8235	4.89623	9.87449
						2016	10	8	281	33.9	19.7	26.8	31	28.3383	32.1923	17.0859	4.46931	8.66327
						2016	10	9	282	32.4	19.3	25.85	34	23.0512	24.1576	13.349	3.41744	6.32587
						2016	10	10	283	32	16.9	24.45	38.5	28.5266	34.4602	17.7361	4.39495	8.17603
						2016	10	11	284	31.2	17	24.1	32.5	26.239	29.8075	15.8202	3.8877	7.61848
						2016	10	12	285	31.3	16.3	23.8	30	30.8884	37.0661	19.1409	4.67007	9.57307
						2016	10	13	286	32.3	17.7	25	32.5	30.3444	35.4423	18.5513	4.65679	9.08985
						2016	10	14	287	33.1	18.7	25.9	35.5	26.4775	30.502	16.076	4.12028	7.7234
						2016	10	15	288	30.7	18.8	24.75	40.5	33.0155	31.4308	18.2227	4.54757	7.34824
						2016	10	16	289	27.5	18.4	22.95	44.5	38.9805	28.3778	18.8143	4.49659	6.16059
						2016	10	17	290	28.1	14.2	21.15	63	31.3743	34.8882	18.7155	4.2754	6.7067
						2016	10	18	291	28.7	14.5	21.6	82.5	30.2806	34.3988	18.257	4.21884	6.67566
						2016	10	19	292	29	15.1	22.05	75.5	20.9602	23.3077	12.5032	2.92226	4.68572
						2016	10	20	293	27.6	16	21.8	79.5	32.0229	29.7173	17.4506	4.05297	5.84113
						2016	10	21	294	27.2	14.7	20.95	84.5	30.1735	30.1735	17.0687	3.87919	5.82852
						2016	10	22	295	27.7	15.3	21.5	63.5	30.4094	30.1661	17.1332	3.94911	5.89006
						2016	10	23	296	28.7	16.2	22.45	60	29.765	29.765	16.8376	3.97479	5.91975
						2016	10	24	297	28.4	16.3	22.35	67	25.7715	24.9468	14.3434	3.37758	5.01538
						2016	10	25	298	28.4	15.2	21.8	66	19.2709	20.35	11.2023	2.60178	4.12091
						2016	10	26	299	27.9	17.9	22.9	61.5	32.1917	25.7534	16.2878	3.888	5.2153
						2016	10	27	300	26.5	14.7	20.6	60.5	30.6229	28.908	16.8309	3.79059	5.56049
						2016	10	28	301	27.4	12.8	20.1	60.5	7.83762	9.15434	4.7916	1.06509	1.99611
						2016	10	29	302	19.8	15	17.4	60	27.8315	10.6873	9.75613	2.01413	2.12718
						2016	10	30	303	24.3	12.9	18.6	64.5	25.2884	23.063	13.6613	2.91651	4.31643
						2016	10	31	304	25.3	13	19.15	62.5	15.3268	15.0816	8.60052	1.86383	2.98504
						2016	11	1	305	22.1	12.3	17.2	62.5	24.8422	19.4763	12.4429	2.55422	3.57116
						2016	11	2	306	17.2	9.5	13.35	68	28.4982	17.5549	12.6527	2.31158	2.86774
						2016	11	3	307	15.6	9.1	12.35	68	17.0715	8.87716	6.96382	1.23141	1.5352
						2016	11	4	308	18.5	6	12.25	70	21.3234	21.3234	12.0623	2.1259	3.26284
						2016	11	5	309	20.1	7.1	13.6	66	17.5409	18.2425	10.1191	1.86355	2.99727
						2016	11	6	310	22.1	8.6	15.35	70.5	18.755	20.2554	11.0256	2.14365	3.50347
						2016	11	7	311	22.9	11.4	17.15	67	22.6818	20.8673	12.3068	2.52268	3.79634
						2016	11	8	312	22.4	11.4	16.9	58	24.2678	21.3557	12.878	2.62086	3.85053
						2016	11	9	313	23.1	11.6	17.35	57	23.6047	21.7164	12.8076	2.64035	3.95804
						2016	11	10	314	23.2	12.8	18	54	27.6188	22.9788	14.2509	2.99221	4.23891
						2016	11	11	315	23.2	12.2	17.7	35	27.4389	24.1462	14.5607	3.03165	5.34576
						2016	11	12	316	24.4	11.1	17.75	43.5	23.7103	25.2277	13.8351	2.88463	5.01599
						2016	11	13	317	24.4	11.8	18.1	46	20.7609	20.927	11.791	2.48264	4.12472
						2016	11	14	318	22.4	12.5	17.45	46.5	21.9626	17.3944	11.0566	2.28586	3.41051
						2016	11	15	319	22.5	11.5	17	51	24.4532	21.5188	12.9764	2.6485	3.88808
						2016	11	16	320	21.5	12.3	16.9	53	25.6498	18.8783	12.448	2.53335	3.44366
						2016	11	17	321	20.7	11.1	15.9	53	24.5853	18.8815	12.1879	2.40895	3.34526
						2016	11	18	322	14.8	7.1	10.95	55	22.4363	13.8207	9.96129	1.67966	2.08127
						2016	11	19	323	16.7	4.7	10.7	68	12.8876	12.3721	7.14302	1.19397	1.86656
						2016	11	20	324	19.9	6.2	13.05	87.5	10.7578	11.7905	6.37094	1.15273	2.00192
						2016	11	21	325	21.2	8.4	14.8	76	16.2643	16.6546	9.31021	1.7801	2.88592
						2016	11	22	326	18.5	7.4	12.95	67.5	23.0657	20.4823	12.2955	2.21749	3.2421
						2016	11	23	327	17.9	5.7	11.8	81	11.9244	11.6382	6.66403	1.1569	1.8738
						2016	11	24	328	18.8	5.5	12.15	86	20.8601	22.1952	12.172	2.1381	3.36907
						2016	11	25	329	17.5	4.9	11.2	57.5	15.7721	15.8983	8.95767	1.52356	2.38379
						2016	11	26	330	17.5	5	11.25	62.5	19.5633	19.5633	11.0667	1.88552	2.87679
						2016	11	27	331	17.2	4.7	10.95	56.5	18.0067	18.0067	10.1861	1.71757	2.62884
						2016	11	28	332	16	4.5	10.25	57	6.05687	5.57232	3.28638	0.540652	0.964239
						2016	11	29	333	15.4	3.4	9.4	62.5	5.39148	5.17582	2.98826	0.476711	0.86773
						2016	11	30	334	15.3	3	9.15	72	10.732	10.5603	6.02216	0.951873	1.48582
						2016	12	1	335	10.9	4.7	7.8	69.5	45.74	22.687	18.2227	2.73602	2.62767
						2016	12	2	336	9.4	5.2	7.3	77	57.3777	19.2789	18.8143	2.76968	2.16851
						2016	12	3	337	12.4	7.1	9.75	82	50.8093	21.5431	18.7155	3.02406	2.88611
						2016	12	4	338	10.3	1.9	6.1	82	39.3704	26.4569	18.257	2.55915	2.5584
						2016	12	5	339	13.5	5.7	9.6	92.5	27.9804	17.4598	12.5032	2.00928	2.36505
						2016	12	6	340	12.8	6.4	9.6	85.5	43.1122	22.0734	17.4506	2.80433	2.92319
						2016	12	7	341	11.3	2.4	6.85	77.5	35.7591	25.4604	17.0687	2.46766	2.6775
						2016	12	8	342	11.9	1.2	6.55	76.5	32.7361	28.0221	17.1332	2.44684	2.83724
						2016	12	9	343	9.8	3.3	6.55	70.5	41.2766	21.4638	16.8376	2.40462	2.2193
						2016	12	10	344	12.7	-0.3	6.2	77.5	24.8634	25.8579	14.3434	2.01898	2.53377
						2016	12	11	345	12.3	1.8	7.05	69.5	21.6069	18.1498	11.2023	1.63268	2.00608
						2016	12	12	346	13.7	1.8	7.75	75	29.5101	28.0936	16.2878	2.44075	3.18752
						2016	12	13	347	9.8	3	6.4	84.5	40.3397	21.9448	16.8309	2.38886	2.22827
						2016	12	14	348	8.2	4.9	6.55	87.5	16.4856	4.35219	4.7916	0.684302	0.607001
						2016	12	15	349	7.7	1.6	4.65	88	24.6884	12.0479	9.75613	1.28458	1.03714
						2016	12	16	350	6.5	0.4	3.45	71.5	34.5707	16.8705	13.6613	1.70263	1.09909
						2016	12	17	351	5.9	-1.3	2.3	79	20.0326	11.5388	8.60052	1.01388	0.561696
						2016	12	18	352	6.5	0.5	3.5	69.5	31.7488	15.2394	12.4429	1.55443	1.01635
						2016	12	19	353	3.6	-1.1	1.25	75	36.4766	13.7152	12.6527	1.41366	0.376893
						2016	12	20	354	7.1	-2	2.55	73.5	14.428	10.5036	6.96382	0.831151	0.56725
						2016	12	21	355	8.2	-2.2	3	76.5	23.3773	19.4499	12.0623	1.47151	1.1129
						2016	12	22	356	3.9	-1.5	1.2	69	27.2162	11.7574	10.1191	1.12763	0.317977
						2016	12	23	357	9.2	2.5	5.85	74	26.6223	14.2696	11.0256	1.52933	1.42293
						2016	12	24	358	10.7	1.9	6.3	83.5	25.929	18.254	12.3068	1.73953	1.86534
						2016	12	25	359	7.9	5.5	6.7	87	51.9543	9.97522	12.878	1.85047	1.15481
						2016	12	26	360	7.9	5.9	6.9	88	56.6022	9.05635	12.8076	1.85538	1.08868
						2016	12	27	361	7.5	5.3	6.4	74.5	60.0496	10.5687	14.2509	2.02267	1.17359
						2016	12	28	362	9.1	5.5	7.3	76.5	47.9636	13.8135	14.5607	2.1435	1.61388
						2016	12	29	363	12.5	3.2	7.85	71.5	28.3544	21.0957	13.8351	2.08132	2.46925
						2016	12	30	364	7.8	3.8	5.8	73.5	36.8469	11.791	11.791	1.63204	1.19991
						2016	12	31	365	11.6	3.8	7.7	72.5	24.7431	15.4397	11.0566	1.6536	1.84332
										10.9	2.6					10.6019
																	1577.9	2505.03
																	ETo-HS	ETo-TURC (Ousman Couly (2016)

## Sheet: 2017
	DİYARBAKIR province					year	month	day	DOY	Tmax	Tmin	Tmean	RHmean.	Ra	Rs=0.16(Tmax-Tmin)^0.5*Ra	Rs=from meteorological station	ETo-HS	ETo-TURC (Ousman Couly (2016)
	DOY	246					#	#		°C	°C	°C	%	MJ m-2 day-1*(0.408 mm day-1)
	φ (-)	37.89	0.661305			2017	1	1	1	11.1	1.5	6.3	69.5	15.7373	12.0862	7.80164	1.10273	1.29982
	tan(φ)		0.778198			2017	1	2	2	10.7	0.8	5.75	70	2.56662	2.03276	1.29211	0.178467	0.35416
	sin(φ)		0.614147			2017	1	3	3	7.4	3.3	5.35	71.5	5.47324	1.79522	1.77319	0.240755	0.316641
	cos(φ)		0.789191			2017	1	4	4	8.4	0.1	4.25	79	6.57086	4.36305	3.02888	0.391704	0.441657
	dr	0.984766		(1+0.033*cos(2*3.14/365*DOY))		2017	1	5	5	6.6	3.9	5.25	81.5	22.5509	4.871	5.92879	0.801503	0.559458
	δ	0.120494		(0.409*sin(2*3.14/365*DOY-1.39))		2017	1	6	6	13	4.8	8.9	72	10.8794	7.13689	4.98462	0.78057	1.06515
	tan(δ)	0.121081				2017	1	7	7	12.3	2.4	7.35	81	5.29958	4.19726	2.66796	0.393536	0.640963
	sin(δ)	0.120203				2017	1	8	8	10.7	2.8	6.75	62	27.6613	17.4819	12.4396	1.79112	1.88295
	cos(δ)	0.992749				2017	1	9	9	6.5	2.1	4.3	59.5	36.623	12.8913	12.2914	1.59316	1.03472
	X	0.991122				2017	1	10	10	9.9	0.5	5.2	75.5	18.5925	13.9815	9.12054	1.23032	1.28254		-
	ωs (eq. 25)	1.49064		(acos{(-1*tan(-0.35)*tan(0.409*sin(2*3.14/365*DOY-1.39))))		2017	1	11	11	12.3	2.3	7.3	70.5	22.5857	18.0686	11.4276	1.68227	2.04569
	sin ωs	0.996789				2017	1	12	12	12.7	3.5	8.1	67	11.3625	8.36282	5.51428	0.837638	1.13623
	sin φ*sin δ	-0.0738224		(sin(0.35)*sin(0.409*sin(2*3.14/365*DOY-1.39)))		2017	1	13	13	11.1	3.7	7.4	67	25.6359	15.1764	11.1579	1.64912	1.76827
	cos φ*cos δ	0.783469		(cos(0.35)*cos(0.409*sin(2*3.14/365*DOY-1.39))		2017	1	14	14	7.8	0.5	4.15	65	11.424	6.67164	4.93857	0.635775	0.588608
	Gsc	0.082				2017	1	15	15	9.6	3.8	6.7	72.5	27.2508	12.6444	10.5006	1.50885	1.41029
						2017	1	16	16	11	0.9	5.95	78	2.50485	2.02392	1.27369	0.177416	0.362201
	Ra	24.8453				2017	1	17	17	13.2	2.1	7.65	71	9.85275	8.74924	5.25217	0.783962	1.13489
						2017	1	18	18	14.5	3.6	9.05	65.5	8.19499	7.14603	4.32894	0.681701	1.07741
						2017	1	19	19	15.5	3.6	9.55	64	7.98648	7.60313	4.40807	0.707089	1.1689
						2017	1	20	20	14.1	3.5	8.8	62	33.0469	28.0237	17.2149	2.68567	3.45169
						2017	1	21	21	13	3.1	8.05	63.5	33.984	26.9153	17.1085	2.59382	3.14025
						2017	1	22	22	12.2	1.7	6.95	56.5	25.5617	21.4718	13.2527	1.92374	2.31271
						2017	1	23	23	13.4	2.2	7.8	50.5	23.502	21.0578	12.5844	1.88948	2.45489
						2017	1	24	24	12.8	2.1	7.45	53.5	14.4664	12.3833	7.57135	1.12125	1.48891
						2017	1	25	25	8.5	4.4	6.45	71.5	54.05	17.7284	17.5109	2.49051	1.84741
						2017	1	26	26	8.4	3.7	6.05	87	55.4192	20.8376	19.2234	2.68897	2.04279
						2017	1	27	27	8.3	2.1	5.2	81.5	16.4465	8.15747	6.55224	0.883864	0.817768
						2017	1	28	28	7.1	0.7	3.9	91.5	45.4644	23.2778	18.4027	2.34212	1.62273
						2017	1	29	29	7.9	0.1	4	73	22.0605	13.7658	9.85787	1.2604	1.0348
						2017	1	30	30	6.7	-2.5	2.1	83.5	33.3025	24.5106	16.1618	1.8863	1.01269
						2017	1	31	31	4.6	-4.5	0.05	85.5	39.586	28.8186	19.1065	2.00027	0.0318328
						2017	2	1	32	3.7	-5.4	-0.85	69.5	46.8798	34.1285	22.627	2.24939	-0.674457
						2017	2	2	33	9.2	-0.6	4.3	70.5	18.2993	14.3467	9.16576	1.18803	1.13524
						2017	2	3	34	12.1	-1.5	5.3	66	34.3269	37.3477	20.2546	2.74413	3.19192
						2017	2	4	35	10.9	-0.6	5.15	74	27.8428	25.6154	15.1071	2.03344	2.19512
						2017	2	5	36	10.9	3.7	7.3	70.5	46.0241	26.5099	19.7593	2.90879	2.90231
						2017	2	6	37	11.6	3.8	7.7	74	32.6973	20.4031	14.611	2.18518	2.36524
						2017	2	7	38	15.5	3.3	9.4	76	14.1795	13.8392	7.92432	1.26415	1.90237
						2017	2	8	39	15.4	3.2	9.3	84	43.9509	42.896	24.5622	3.90395	5.33723
						2017	2	9	40	11.5	5.6	8.55	93	46.6299	22.0093	18.1222	2.80065	2.71232
						2017	2	10	41	15.4	3.8	9.6	89.5	23.187	21.5175	12.6355	2.03054	2.85594
						2017	2	11	42	16.1	3.2	9.65	82.5	29.8616	30.8172	17.1604	2.76273	3.99358
						2017	2	12	43	13.9	5	9.45	86	22.911	16.3126	10.936	1.74781	2.20493
						2017	2	13	44	12.7	3.2	7.95	74.5	18.2193	13.8466	8.98488	1.35693	1.71137
						2017	2	14	45	10.8	3	6.9	66	21.027	13.1209	9.39605	1.36116	1.48566
						2017	2	15	46	9.5	2.1	5.8	76	45.8846	27.1637	19.9712	2.76429	2.52876
						2017	2	16	47	9.6	0.1	4.85	66	32.7249	24.8709	16.1384	2.14386	2.0421
						2017	2	17	48	8.1	-2.4	2.85	48	39.4497	33.1378	20.4531	2.47712	1.79344
						2017	2	18	49	11.9	-1.9	5	46	31.4687	34.7414	18.7042	2.50116	3.01755
						2017	2	19	50	14.5	0.3	7.4	52	34.405	39.084	20.7437	3.06587	4.21666
						2017	2	20	51	14.9	2.5	8.7	56.5	14.3315	14.2169	8.07463	1.25498	1.85568
						2017	2	21	52	16.4	3.4	9.9	56	36.9369	38.4144	21.3085	3.46179	4.99229
						2017	2	22	53	17.5	3.7	10.6	54.5	39.2049	43.2822	23.3023	3.88138	5.82394
						2017	2	23	54	18.3	4	11.15	48.5	35.9148	41.0866	21.7301	3.68959	5.82936
						2017	2	24	55	19.3	5.2	12.25	57	31.9837	36.0777	19.2158	3.38666	5.31896
						2017	2	25	56	20.1	5.7	12.9	53.5	31.6068	36.411	19.1903	3.45531	5.51848
						2017	2	26	57	21.5	7.3	14.4	58	35.2855	40.0844	21.2746	4.01777	6.40362
						2017	2	27	58	21.4	8.7	15.05	56	30.3631	30.8489	17.3128	3.33558	5.11403
						2017	2	28	59	21.5	8.3	14.9	55.5	38.4452	40.5981	22.3485	4.28612	6.59453
						2017	3	1	60	18.2	10.9	14.55	55	57.557	33.6133	24.8817	4.72087	5.44973
						2017	3	2	61	15.2	9.6	12.4	68.5	60.9269	27.2952	23.0687	4.086	4.12251
						2017	3	3	62	13.5	5.2	9.35	89	25.9437	17.2266	11.9589	1.90427	2.29935
						2017	3	4	63	16.1	7.7	11.9	83.5	45.0388	30.2661	20.8856	3.63807	4.43724
						2017	3	5	64	19.3	6.2	12.75	70.5	30.525	31.9902	17.6771	3.16731	4.85412
						2017	3	6	65	20.4	8.8	14.6	61	29.6572	27.5219	16.1614	3.07109	4.52782
						2017	3	7	66	20	8	14	57	28.123	26.9981	15.5874	2.90715	4.35319
						2017	3	8	67	21.3	8.7	15	50.5	44.0961	44.4489	25.0441	4.81779	7.21353
						2017	3	9	68	21.6	9.5	15.55	55.5	45.5141	44.0576	25.3313	4.95476	7.28166
						2017	3	10	69	22.1	9.8	15.95	48.5	49.6754	48.8806	27.875	5.51767	8.31744
						2017	3	11	70	19	10.6	14.8	55.5	59.6759	40.1022	27.6731	5.29108	6.4959
						2017	3	12	71	19.5	6.8	13.15	63.5	49.4266	50.2174	28.1827	5.11577	7.57482
						2017	3	13	72	16.7	7.2	11.95	71	53.1499	40.3939	26.211	4.5734	5.83977
						2017	3	14	73	17.3	7.3	12.3	68.5	41.8175	33.454	21.1582	3.73519	4.96444
						2017	3	15	74	14.7	4.2	9.45	74	38.1891	32.0788	19.7995	3.16438	4.09397
						2017	3	16	75	16.1	6.8	11.45	80	51.8829	38.6009	25.3154	4.3429	5.46057
						2017	3	17	76	12.2	5.3	8.75	71.5	48.0381	26.517	20.1897	3.14386	3.26722
						2017	3	18	77	15.1	6.7	10.9	85	39.2828	26.398	18.2164	3.06628	3.71664
						2017	3	19	78	18.7	4.8	11.75	81	37.5362	41.7403	22.3912	3.88064	5.96829
						2017	3	20	79	18.4	8.4	13.4	72	37.2562	29.8049	18.8503	3.44938	4.6652
						2017	3	21	80	19.2	7.2	13.2	73	39.289	37.7174	21.7762	3.95923	5.77631
						2017	3	22	81	11.9	7.3	9.6	85	25.6726	9.44753	8.80987	1.41575	1.39576
						2017	3	23	82	17.5	4.6	11.05	69	21.2131	21.892	12.1905	2.06269	3.15356
						2017	3	24	83	21.6	8.1	14.85	60	32.9603	35.5971	19.3766	3.71047	5.81214
						2017	3	25	84	22.6	8.9	15.75	57.5	29.2665	32.0761	17.3321	3.41045	5.42491
						2017	3	26	85	24.9	9	16.95	56.5	33.1641	42.1847	21.1586	4.3123	7.28143
						2017	3	27	86	22.7	9.7	16.2	42.5	35.6603	37.0867	20.572	4.10226	6.98157
						2017	3	28	87	21.7	9.9	15.8	47	51.04	48.1817	28.0525	5.52813	8.33713
						2017	3	29	88	22.6	9.3	15.95	62	48.583	51.6923	28.3485	5.61141	8.59214
						2017	3	30	89	23.7	11.2	17.45	58.5	40.3767	40.3767	22.8405	4.72207	7.07931
						2017	3	31	90	20.4	10.2	15.3	73	46.3611	37.8306	23.6905	4.59907	6.24896
						2017	4	1	91	17.1	9.4	13.25	80	49.534	30.513	21.9922	4.00496	4.74041
						2017	4	2	92	18.9	8.9	13.9	76	61.2777	49.0221	31.0043	5.76434	7.62084
						2017	4	3	93	19.6	7.8	13.7	77.5	41.2638	38.953	22.6793	4.18994	6.0735
						2017	4	4	94	22.7	8.1	15.4	66	47.1826	55.1092	28.8455	5.61674	8.98254
						2017	4	5	95	23.3	10	16.65	58.5	48.2558	51.3442	28.1576	5.68922	8.71407
						2017	4	6	96	23.7	11	17.35	55.5	53.35	54.2036	30.4198	6.27119	9.35936
						2017	4	7	97	23.1	13.4	18.25	67	57.4926	44.6143	28.6495	6.05747	7.94675
						2017	4	8	98	18.1	9.1	13.6	65.5	62.8172	45.2284	30.1523	5.55287	6.97533
						2017	4	9	99	15.5	9	12.25	81	73.9825	38.4709	30.1791	5.31886	5.65248
						2017	4	10	100	17.8	5.8	11.8	69.5	55.0623	52.8598	30.5186	5.29816	7.50024
						2017	4	11	101	20.6	7.9	14.25	65	50.8666	51.6804	29.0038	5.45193	8.12072
						2017	4	12	102	22.3	10.3	16.3	60	50.9868	48.9473	28.2597	5.65185	8.23934
						2017	4	13	103	18.7	12.9	15.8	80	73.1585	33.9455	28.1902	5.55528	5.73059
						2017	4	14	104	22.1	13.4	17.75	72.5	57.497	40.0179	27.1347	5.6576	7.07477
						2017	4	15	105	22.7	10.3	16.5	68	51.1364	50.7273	28.8112	5.79593	8.57652
						2017	4	16	106	23.8	10.6	17.2	68.5	50.3001	53.1169	29.2399	6.00222	9.14172
						2017	4	17	107	24.5	12	18.25	64.5	52.3755	52.3755	29.628	6.26435	9.26732
						2017	4	18	108	20	9.5	14.75	68.5	56.6141	47.5559	29.3521	5.60349	7.63045
						2017	4	19	109	22.3	8.7	15.5	69	51.1295	55.6289	30.169	5.89214	9.09309
						2017	4	20	110	24.2	11.6	17.9	66.5	53.3225	53.749	30.2842	6.34091	9.41796
						2017	4	21	111	26.2	11.8	19	66	49.3379	56.8373	29.9559	6.46544	10.2083
						2017	4	22	112	28.9	13.1	21	60	46.5701	58.8646	29.618	6.73993	11.0226
						2017	4	23	113	27.7	15.6	21.65	54	52.2471	50.5752	29.0787	6.72807	9.64428
						2017	4	24	114	21.9	9.8	15.85	50.5	50.2204	48.6134	27.9507	5.51628	8.07556
						2017	4	25	115	23.1	11.8	17.45	55.5	55.3635	50.0486	29.7771	6.15616	8.69164
						2017	4	26	116	26.1	10.5	18.3	58	49.0031	61.1559	30.9675	6.55663	10.7746
						2017	4	27	117	28.5	13.9	21.2	55.5	49.1954	57.4602	30.0761	6.87945	10.8112
						2017	4	28	118	28.8	17.6	23.2	56	54.7257	49.0342	29.3036	7.04648	9.62527
						2017	4	29	119	29.9	16.2	23.05	56	48.719	53.3961	28.8522	6.91256	10.4199
						2017	4	30	120	30.4	16.6	23.5	54.5	48.9071	53.9934	29.0691	7.04124	10.6122
						2017	5	1	121	32.4	17.6	25	62	47.5722	56.3254	29.2822	7.35048	11.318
						2017	5	2	122	23.4	16.6	20	63.5	71.0296	38.6401	29.6356	6.57012	7.21504
						2017	5	3	123	22.4	12.3	17.35	82.5	58.3724	47.1649	29.6816	6.11901	8.1891
						2017	5	4	124	25.1	13.9	19.5	72.5	55.1042	49.3733	29.5062	6.45491	9.01727
						2017	5	5	125	27.2	15.3	21.25	71	53.2222	50.6675	29.3756	6.72784	9.58732
						2017	5	6	126	28.9	14.9	21.9	67.5	49.5762	55.5254	29.6795	6.9106	10.6003
						2017	5	7	127	27	13.4	20.2	78	50.559	55.0082	29.8324	6.64874	10.1576
						2017	5	8	128	27	13	20	70.5	48.8978	54.7655	29.2734	6.48983	10.0716
						2017	5	9	129	31.9	14.8	23.35	66.5	40.9066	55.9602	27.0652	6.53204	10.9569
						2017	5	10	130	35.1	18	26.55	63	45.1946	61.8262	29.9023	7.77797	12.6609
						2017	5	11	131	32.6	18.8	25.7	56.5	48.3287	53.3549	28.7253	7.32862	10.8533
						2017	5	12	132	31.4	19.2	25.3	57	50.881	49.6599	28.4352	7.18789	10.0713
						2017	5	13	133	33.2	20	26.6	54	48.2553	50.9576	28.0512	7.30471	10.5152
						2017	5	14	134	37	20.9	28.95	59.5	45.347	58.4069	29.1126	7.98236	12.3533
						2017	5	15	135	34.1	19.5	26.8	55.5	47.5914	55.5868	29.0955	7.61076	11.4636
						2017	5	16	136	29.6	18.5	24.05	60	53.4518	47.4652	28.4934	6.99371	9.46117
						2017	5	17	137	31.4	18	24.7	57.5	48.3506	51.8319	28.3188	7.05881	10.4
						2017	5	18	138	34.1	19.3	26.7	56	47.0042	55.6529	28.9326	7.55119	11.4614
						2017	5	19	139	34.5	18.9	26.7	44.5	43.8186	54.6856	27.6911	7.22718	12.1548
						2017	5	20	140	27.3	16.3	21.8	57.5	53.8931	47.4259	28.5989	6.64221	9.09316
						2017	5	21	141	27.2	13.5	20.35	67	48.2602	52.8932	28.5805	6.39487	9.8122
						2017	5	22	142	27.5	12.6	20.05	59	45.8157	54.6123	28.2962	6.28147	10.0552
						2017	5	23	143	22.2	13.8	18	74.5	61.0546	41.0287	28.3125	5.94469	7.29098
						2017	5	24	144	25.9	12.8	19.35	64.5	46.2108	48.4289	26.7608	5.83077	8.82206
						2017	5	25	145	29.7	15	22.35	58	47.4443	55.7945	29.1047	6.85356	10.7377
						2017	5	26	146	31.4	16.9	24.15	59.5	46.8234	54.3151	28.5277	7.01886	10.7861
						2017	5	27	147	31.2	17.3	24.25	49	48.0879	53.4738	28.6856	7.07452	10.7941
						2017	5	28	148	31.8	14	22.9	54	42.4759	60.4857	28.673	6.8444	11.721
						2017	5	29	149	34.7	18.8	26.75	49	44.6535	56.7992	28.4888	7.44371	11.8638
						2017	5	30	150	33.8	18.2	26	46	45.7473	57.0926	28.91	7.4266	12.2993
						2017	5	31	151	31.3	17	24.15	51	48.4486	55.4252	29.3136	7.21222	10.9984
						2017	6	1	152	30.5	17.5	24	53.5	50.4678	52.4866	29.1143	7.13758	10.4115
						2017	6	2	153	31.6	19.5	25.55	56	50.1693	48.5639	27.9223	7.09917	9.89406
						2017	6	3	154	34.8	20.5	27.65	48	47.7988	54.6818	28.9204	7.70916	11.7356
						2017	6	4	155	36.9	21.9	29.4	48.5	46.8485	56.2183	29.031	8.03659	12.2254
						2017	6	5	156	38.2	23.3	30.75	46	47.1384	56.1889	29.113	8.28982	12.8369
						2017	6	6	157	37.3	23.5	30.4	39.5	48.3147	53.3394	28.717	8.11808	13.2318
						2017	6	7	158	36.6	19.4	28	41.5	42.4419	58.4001	28.163	7.56507	13.6933
						2017	6	8	159	37	23.6	30.3	45	49.6467	53.2213	29.0779	8.20306	12.288
						2017	6	9	160	39.8	24.8	32.3	45	46.3195	55.5834	28.7031	8.43403	13.081
						2017	6	10	161	36.4	25.2	30.8	37	54.7922	49.0938	29.3391	8.3628	12.652
						2017	6	11	162	35.2	21.8	28.5	42.5	48.1662	51.6342	28.2107	7.66062	12.0807
						2017	6	12	163	36.8	22.5	29.65	44.5	45.6833	52.2617	27.6405	7.69219	12.0678
						2017	6	13	164	38.7	22.9	30.8	41.5	44.0131	55.6325	27.9918	7.97875	13.4947
						2017	6	14	165	31.3	22.5	26.9	39.5	58.6629	41.2987	27.8435	7.29962	9.93057
						2017	6	15	166	33.5	18.9	26.2	47	45.091	52.6663	27.5668	7.11389	11.257
						2017	6	16	167	35.5	23.3	29.4	46	48.9136	47.7397	27.3357	7.56728	10.813
						2017	6	17	168	34.7	21.9	28.3	44.5	47.259	48.3932	27.0526	7.31439	11.032
						2017	6	18	169	35.2	22.5	28.85	36	45.4378	46.1648	25.9083	7.08857	11.8103
						2017	6	19	170	34.9	21.8	28.35	39	45.7097	47.9038	26.4706	7.1648	11.7281
						2017	6	20	171	31.9	21.1	26.5	38.5	49.9863	43.1882	26.2835	6.82896	10.4354
						2017	6	21	172	33.7	20	26.85	41.5	45.411	49.7704	26.8931	7.04256	11.5669
						2017	6	22	173	33.2	18.2	25.7	43.5	42.6938	51.2326	26.4564	6.74975	11.4071
						2017	6	23	174	35.3	22.7	29	41	46.2569	46.627	26.2713	7.21101	11.2335
						2017	6	24	175	36.8	24.7	30.75	38	47.4339	45.916	26.3999	7.51725	11.7173
						2017	6	25	176	39.4	26.2	32.8	35	38.5223	40.6795	22.3933	6.64565	11.0475
						2017	6	26	177	40.4	27.3	33.85	34	44.4871	46.6225	25.7626	7.8042	12.8557
						2017	6	27	178	41.2	26.7	33.95	32	42.2396	48.9979	25.735	7.81092	13.8087
						2017	6	28	179	41.1	24.1	32.6	29	39.1506	53.2448	25.8275	7.63451	15.2726
						2017	6	29	180	41.8	23.7	32.75	27	37.4053	54.1629	25.462	7.54886	15.8902
						2017	6	30	181	41	28.9	34.95	29.5	46.6613	45.1682	25.9699	8.03453	13.2526
						2017	7	1	182	41.5	28.3	34.9	23	44.0165	46.4814	25.5872	7.90862	14.5929
						2017	7	2	183	41.9	29.9	35.9	33.5	45.4706	43.6518	25.2024	7.93751	12.3586
						2017	7	3	184	43.5	28.9	36.2	32	42.2043	49.2946	25.802	8.17174	14.1585
						2017	7	4	185	43.3	29.6	36.45	33.5	40.5765	44.4718	24.03	7.64578	12.6363
						2017	7	5	186	43.3	25	34.15	24.5	33.8426	49.5455	23.1637	7.05768	15.1734
						2017	7	6	187	42.5	28.3	35.4	23.5	40.5397	46.0531	24.4424	7.62648	14.451
						2017	7	7	188	39.1	27.1	33.1	33.5	46.0591	44.2168	25.5286	7.621	12.2069
						2017	7	8	189	37.7	24.5	31.1	35.5	42.6163	45.0028	24.7732	7.10492	11.8887
						2017	7	9	190	39.3	26.1	32.7	30.5	38.3703	40.519	22.305	6.60635	11.5776
						2017	7	10	191	40.8	25.3	33.05	29.5	42.29	52.4396	26.6394	7.9448	15.0322
						2017	7	11	192	42	28.3	35.15	26	42.8481	46.9615	25.3753	7.88035	14.3119
						2017	7	12	193	42.4	29	35.7	27.5	41.7738	44.7815	24.4667	7.67711	13.5199
						2017	7	13	194	42.5	28.9	35.7	32	41.1355	44.7554	24.272	7.61602	12.8551
						2017	7	14	195	42.3	26.8	34.55	34	38.2461	47.4251	24.092	7.39703	13.1494
						2017	7	15	196	42	28.5	35.25	31	43.0646	46.5097	25.3167	7.87699	13.4373
						2017	7	16	197	40.6	26.5	33.55	27	40.5111	45.6965	24.339	7.33013	13.6005
						2017	7	17	198	40.7	26.7	33.7	26.5	39.4672	44.2033	23.6277	7.13668	13.2646
						2017	7	18	199	43.3	28.2	35.75	26	37.2085	44.9479	23.134	7.26572	13.7937
						2017	7	19	200	40.7	26.2	33.45	27	38.321	44.4524	23.3475	7.01784	13.2342
						2017	7	20	201	41	22.4	31.7	29.5	32.8647	48.9026	22.678	6.58383	13.8727
						2017	7	21	202	41.7	25.7	33.7	29.5	29.6315	37.9284	18.9642	5.72808	11.0987
						2017	7	22	203	41.3	27.6	34.45	26	26.1238	28.6317	15.471	4.74102	8.90964
						2017	7	23	204	41.1	24.6	32.85	32	34.1899	45.1307	22.2208	6.60097	12.6338
						2017	7	24	205	39.9	26.5	33.2	27	34.6886	37.1862	20.317	6.07712	11.1421
						2017	7	25	206	38.7	27.7	33.2	29	40.6297	35.7541	21.5605	6.44908	10.505
						2017	7	26	207	40.9	26.5	33.7	28.5	33.8404	38.9841	20.5464	6.206	11.5174
						2017	7	27	208	42.8	27.7	35.25	27	35.3027	42.6457	21.9491	6.8292	12.9248
						2017	7	28	209	41	29.3	35.15	26	39.7252	37.1828	21.741	6.7517	11.4588
						2017	7	29	210	39	23.3	31.15	28.5	32.5326	40.8609	20.6247	5.92119	11.7475
						2017	7	30	211	42.4	23.1	32.75	33	28.9596	44.7136	20.3559	6.03504	12.368
						2017	7	31	212	42.5	27.6	35.05	28.5	33.0149	39.3538	20.3903	6.32028	11.7606
						2017	8	1	213	44.3	29	36.65	30	15.5787	19.0684	9.74985	3.11361	5.98401
						2017	8	2	214	43.2	29.3	36.25	27	22.929	25.497	13.6777	4.33587	8.03648
						2017	8	3	215	38.4	24.1	31.25	29.5	36.0934	41.2908	21.8381	6.28236	11.7476
						2017	8	4	216	38.5	23.8	31.15	29.5	34.6953	40.8016	21.2838	6.1104	11.603
						2017	8	5	217	37.8	23.7	30.75	26.5	35.2257	39.7346	21.1636	6.02625	11.6402
						2017	8	6	218	40	25.7	32.85	25.5	35.2145	40.2854	21.3064	6.32932	12.1748
						2017	8	7	219	40.1	26.6	33.35	25.5	35.1703	37.9839	20.6758	6.20264	11.568
						2017	8	8	220	43.2	28.5	35.85	23	32.2361	37.9096	19.7752	6.22241	12.1141
						2017	8	9	221	44.8	30.1	37.45	21.5	31.2635	36.7658	19.1786	6.21464	12.1022
						2017	8	10	222	43.4	28.7	36.05	28.5	31.0464	36.5106	19.0454	6.01512	11.0456
						2017	8	11	223	38	23.9	30.95	25	31.9224	36.0085	19.179	5.48363	10.7962
						2017	8	12	224	38.9	24.8	31.85	28	30.8192	34.7641	18.5162	5.39186	10.2079
						2017	8	13	225	38	23.6	30.8	32	7.98358	9.19709	4.84729	1.38167	2.9581
						2017	8	14	226	38.7	23.9	31.3	29.5	29.8101	35.2952	18.3491	5.28402	10.1292
						2017	8	15	227	40.1	26.4	33.25	32	28.2661	30.9796	16.7396	5.01198	8.88116
						2017	8	16	228	38.2	25.3	31.75	30	24.7315	25.5229	14.2124	4.13026	7.47448
						2017	8	17	229	40.1	25.8	32.95	32.5	27.1013	31.0039	16.3975	4.88071	8.81225
						2017	8	18	230	38.1	24	31.05	29	3.19461	3.60352	1.91932	0.549895	1.5471
						2017	8	19	231	37.6	21.8	29.7	29	9.63556	12.1793	6.12809	1.70721	3.82083
						2017	8	20	232	38.4	22.5	30.45	27.5	15.5773	19.8143	9.93826	2.81239	6.01158
						2017	8	21	233	38.4	24	31.2	30	11.9343	13.7484	7.24602	2.0824	4.26313
						2017	8	22	234	34.4	22.2	28.3	32.5	11.2157	10.9465	6.26794	1.6947	3.30165
						2017	8	23	235	39.1	21.4	30.25	24.5	13.2071	18.7013	8.89026	2.50539	5.87834
						2017	8	24	236	39.7	25.1	32.4	25	8.33347	9.73349	5.09474	1.50001	3.40016
						2017	8	25	237	40	26	33	27	12.1015	13.5537	7.24477	2.15852	4.42955
						2017	8	26	238	42.1	28.4	35.25	22	16.3262	17.8935	9.66862	3.00828	6.08393
						2017	8	27	239	41.6	28.8	35.2	37.5	2.97476	3.04616	1.70285	0.529323	1.31581
						2017	8	28	240	37.2	23.2	30.2	29.5	6.47704	7.25429	3.87758	1.09162	2.50223
						2017	8	29	241	36.5	22.7	29.6	25	18.0266	19.9014	10.7145	2.97865	6.14039
						2017	8	30	242	36.5	22.3	29.4	26.5	8.5535	9.71677	5.15713	1.42764	3.23721
						2017	8	31	243	36.9	23.1	30	26	16.5712	18.2946	9.8495	2.76128	5.65722
						2017	9	1	244	39.4	23.8	31.6	24	10.4703	13.067	6.61672	1.91707	4.36967
						2017	9	2	245	39.5	21.8	30.65	24	7.63515	10.8114	5.13954	1.46045	3.68265
						2017	9	3	246	39	24.4	31.7	20	15	17.52	9.17037	2.66232	5.89499
						2017	9	4	247	38.9	25.9	32.4	22	15.3563	15.9705	8.85885	2.60825	5.3578
						2017	9	5	248	38.8	25.4	32.1	20.5	1.50624	1.61469	0.882201	0.258188	1.11256
						2017	9	6	249	36.9	20.5	28.7	34.5	1.94439	2.55104	1.25987	0.343594	1.15411
						2017	9	7	250	33.3	22.2	27.75	18.5	34.4218	30.5666	18.3491	4.90198	9.52855
						2017	9	8	251	37.2	21.3	29.25	19.5	26.2378	33.3745	16.7396	4.61927	10.4336
						2017	9	9	252	39.7	23.1	31.4	19	21.8018	28.9528	14.2124	4.10109	9.3963
						2017	9	10	253	39.9	22.3	31.1	23.5	24.4288	34.3958	16.3975	4.70279	10.519
						2017	9	11	254	40.6	23.6	32.1	25.5	2.9094	3.95678	1.91932	0.561715	1.72466
						2017	9	12	255	38.8	25.6	32.2	27.5	10.5419	11.1322	6.12809	1.79706	3.69508
						2017	9	13	256	38.4	24	31.2	28.5	16.3685	18.8565	9.93826	2.85611	5.73204
						2017	9	14	257	38.1	23.6	30.85	32.5	11.8931	13.796	7.24602	2.06752	4.14193
						2017	9	15	258	38.2	24.9	31.55	22.5	10.7418	11.4293	6.26794	1.81418	3.95643
						2017	9	16	259	42.1	26.7	34.4	25	14.159	17.4439	8.89026	2.72178	5.7228
						2017	9	17	260	39.9	27.5	33.7	25.5	9.04256	8.97022	5.09474	1.53885	3.20302
						2017	9	18	261	38.1	26.7	32.4	35	13.4107	12.2306	7.24477	2.13303	3.68476
						2017	9	19	262	35.3	23.2	29.25	31	17.3721	16.8162	9.66862	2.66804	4.92572
						2017	9	20	263	36.9	25.6	31.25	28.5	3.16605	2.86211	1.70285	0.489874	1.35586
						2017	9	21	264	35.8	22.6	29.2	39	6.67043	7.04398	3.87758	1.06887	2.16456
						2017	9	22	265	36.5	21.8	29.15	44.5	17.466	20.5401	10.7145	2.95037	4.99579
						2017	9	23	266	31.9	18.4	25.15	50.5	8.77245	9.47425	5.15713	1.29909	2.2456
						2017	9	24	267	32.8	18.9	25.85	37.5	16.5115	18.3608	9.8495	2.52154	4.72821
						2017	9	25	268	34.4	20.3	27.35	34	11.0132	12.4229	6.61672	1.75214	3.5696
						2017	9	26	269	35.8	23.1	29.45	32	9.01369	9.15791	5.13954	1.42428	2.90423
						2017	9	27	270	34.1	19.6	26.85	25.5	15.0516	17.4599	9.17037	2.40146	5.24914
						2017	9	28	271	33.6	18.3	25.95	30	14.1551	17.3258	8.85885	2.27313	4.90394
						2017	9	29	272	31.7	19	25.35	44	1.5472	1.57195	0.882201	0.223263	0.774327
						2017	9	30	273	31.8	19.8	25.8	51.5	2.27308	2.18216	1.25987	0.322166	0.837468
						2017	10	1	274	30.9	19.4	25.15	31.5	33.8179	31.1124	18.3491	4.62217	8.15134
						2017	10	2	275	30	18	24	30.5	30.202	28.9939	16.7396	4.10384	7.58173
						2017	10	3	276	27.9	17.3	22.6	33.5	27.2831	23.136	14.2124	3.36756	5.8083
						2017	10	4	277	26.3	14.8	20.55	30.5	30.2211	27.8034	16.3975	3.68818	6.84911
						2017	10	5	278	26.5	14.9	20.7	31	3.52207	3.26849	1.91932	0.433387	1.22461
						2017	10	6	279	28.2	14.1	21.15	29.5	10.1999	11.5055	6.12809	1.39991	3.18793
						2017	10	7	280	29.1	15.2	22.15	28	16.6603	18.5263	9.93826	2.3286	5.00814
						2017	10	8	281	30.3	16.7	23.5	28	12.2803	13.361	7.24602	1.75516	3.84251
						2017	10	9	282	29.4	18.3	23.85	29	11.7583	10.4413	6.26794	1.53111	3.10027
						2017	10	10	283	28.1	17.6	22.85	28.5	17.1475	14.4039	8.89026	2.11955	4.03485
						2017	10	11	284	27	16.9	21.95	29.5	10.0194	8.09567	5.09474	1.18776	2.42506
						2017	10	12	285	27.8	14.8	21.3	26.5	12.5584	13.0607	7.24477	1.66138	3.68113
						2017	10	13	286	28.8	14.4	21.6	30	15.9244	18.3449	9.66862	2.23423	4.80675
						2017	10	14	287	29.9	15.7	22.8	36	2.82431	3.20842	1.70285	0.405482	1.18886
						2017	10	15	288	28.4	16.5	22.45	62	7.02534	6.68812	3.87758	0.915366	1.63128
						2017	10	16	289	26.9	15.6	21.25	76	19.9211	18.0087	10.7145	2.45393	3.65242
						2017	10	17	290	26.1	14.1	20.1	62.5	9.30459	8.93241	5.15713	1.14634	1.95671
						2017	10	18	291	27.9	15.1	21.5	77.5	17.2064	17.6193	9.8495	2.27026	3.59898
						2017	10	19	292	29.2	14	21.6	92.5	10.6072	12.8984	6.61672	1.529	2.74213
						2017	10	20	293	29.2	15.1	22.15	28	8.55451	9.64948	5.13954	1.20423	2.85178
						2017	10	21	294	28.7	15.3	22	38	15.6572	16.7845	9.17037	2.14061	4.07544
						2017	10	22	295	28.4	15.3	21.85	55.5	15.2976	16.0318	8.85885	2.0601	3.33102
						2017	10	23	296	28	14.1	21.05	55.5	1.4789	1.64454	0.882201	0.201014	0.675999
						2017	10	24	297	28.5	14.5	21.5	51.5	2.10446	2.357	1.25987	0.290393	0.812034
						2017	10	25	298	29.1	17.5	23.3	56	33.6718	31.2474	18.3491	4.42308	6.2871
						2017	10	26	299	28.8	16.1	22.45	55.5	29.3578	29.8276	16.7396	3.95166	5.93138
						2017	10	27	300	27.9	13.9	20.9	56	23.7401	26.5889	14.2124	3.22586	5.17578
						2017	10	28	301	19.3	13.1	16.2	56.5	41.1588	20.4148	16.3975	3.26984	3.6224
						2017	10	29	302	20.7	11.3	16	52	3.91258	2.94226	1.91932	0.38048	0.805162
						2017	10	30	303	21.8	13.4	17.6	58	13.215	8.88045	6.12809	1.27232	1.83604
						2017	10	31	304	19.5	13	16.25	63	24.3632	12.6688	9.93826	1.9847	2.37913
						2017	11	1	305	19.8	11.8	15.8	64	16.0116	10.2474	7.24602	1.42793	1.96197
						2017	11	2	306	20.8	10.6	15.7	71.5	12.266	10.0091	6.26794	1.23151	1.91812
						2017	11	3	307	20.3	10.7	15.5	69.5	17.9332	13.7727	8.89026	1.73631	2.49903
						2017	11	4	308	22.5	11	16.75	71.5	9.38973	8.63855	5.09474	1.03238	1.75458
						2017	11	5	309	22.4	11.9	17.15	70	13.9736	11.7379	7.24477	1.48504	2.28665
						2017	11	6	310	19.4	11.9	15.65	71	22.0655	13.2393	9.66862	1.89683	2.42643
						2017	11	7	311	23.4	12.9	18.15	68.5	3.28445	2.75894	1.70285	0.359041	0.823003
						2017	11	8	312	23.1	11.9	17.5	56.5	7.24156	6.48843	3.87758	0.802793	1.43194
						2017	11	9	313	22.3	13.2	17.75	57.5	22.199	16.1608	10.7145	2.23399	3.06642
						2017	11	10	314	21.7	11.1	16.4	53	9.9	8.3952	5.15713	1.03443	1.69767
						2017	11	11	315	22.1	8.9	15.5	49.5	16.9437	17.8925	9.8495	1.92365	3.17055
						2017	11	12	316	22.9	8.8	15.85	53	11.0132	12.4229	6.61672	1.30586	2.31148
						2017	11	13	317	21.4	10	15.7	55	9.51376	8.67655	5.13954	1.0098	1.70687
						2017	11	14	318	23	10.2	16.6	55.5	16.02	16.4045	9.17037	1.85018	3.01179
						2017	11	15	319	23.5	12	17.75	62.5	16.3271	15.0209	8.85885	1.84708	2.8749
						2017	11	16	320	24.5	12.1	18.3	60.5	1.5658	1.55327	0.882201	0.186785	0.62067
						2017	11	17	321	23	11.3	17.15	59	2.30204	2.15471	1.25987	0.25825	0.701928
						2017	11	18	322	21.7	10.6	16.15	64.5	34.4218	30.5666	18.3491	3.65361	5.24864
						2017	11	19	323	17	11.1	14.05	71	43.0725	20.3302	16.7396	3.12697	3.36149
						2017	11	20	324	17.5	9.6	13.55	85.5	31.6033	19.9733	14.2124	2.61319	3.24612
						2017	11	21	325	15.1	8.7	11.9	74	40.5106	20.7414	16.3975	2.8563	3.13105
						2017	11	22	326	13.5	5.4	9.45	67	4.21488	2.73124	1.91932	0.306748	0.577662
						2017	11	23	327	13.2	2.5	7.85	75.5	11.7088	10.0228	6.12809	0.921893	1.29
						2017	11	24	328	13.5	4.5	9	80.5	20.7047	14.9074	9.93826	1.56212	1.97595
						2017	11	25	329	13	3.8	8.4	57.5	14.9309	10.9891	7.24602	1.11345	1.45547
						2017	11	26	330	15	7	11	64.5	13.8503	8.8642	6.26794	1.05873	1.43669
						2017	11	27	331	15.4	6.5	10.95	58	18.6251	13.2611	8.89026	1.49906	2.00806
						2017	11	28	332	11.3	9	10.15	61.5	20.9961	3.86328	5.09474	0.835164	0.744811
						2017	11	29	333	13	7	10	66.5	18.4854	8.87299	7.24477	1.18124	1.35941
						2017	11	30	334	16.6	5.7	11.15	73	18.3034	15.9605	9.66862	1.64165	2.38592
						2017	12	1	335	16.6	5.2	10.9	68	3.15213	2.87475	1.70285	0.286634	0.647717
						2017	12	2	336	18.9	6	12.45	70	6.74755	6.96347	3.87758	0.687946	1.27293
						2017	12	3	337	21.7	8.7	15.2	62.5	18.573	19.3159	10.7145	2.07374	3.33989
						2017	12	4	338	21.4	8	14.7	63.5	8.80512	9.43909	5.15713	0.983013	1.76896
						2017	12	5	339	15.5	7.6	11.55	50.5	21.9018	13.842	9.8495	1.69547	2.14856
						2017	12	6	340	13	6.5	9.75	51	16.2206	8.43469	6.61672	1.06913	1.28529
						2017	12	7	341	10.6	4.5	7.55	59.5	13.0059	6.34687	5.13954	0.764136	0.875676
						2017	12	8	342	13.3	3.1	8.2	61.5	17.946	14.6439	9.17037	1.39839	1.83352
						2017	12	9	343	12.9	2.3	7.6	64	17.0061	14.4212	8.85885	1.31971	1.72125
						2017	12	10	344	12	2.8	7.4	65.5	1.81783	1.33792	0.882201	0.130388	0.351056
						2017	12	11	345	14.4	3.5	8.95	66	2.38502	2.07974	1.25987	0.197659	0.483045
						2017	12	12	346	17.3	5	11.15	77.5	32.6996	32.1764	18.3491	3.11553	4.52932
						2017	12	13	347	18.3	6.5	12.4	66.5	30.4568	28.7513	16.7396	2.96497	4.32678
						2017	12	14	348	18.8	6.5	12.65	64	25.3276	24.9223	14.2124	2.53817	3.83106
						2017	12	15	349	17.9	6.7	12.3	75	30.6232	27.4383	16.3975	2.89477	4.12423
						2017	12	16	350	18.5	7.3	12.9	81.5	3.58442	3.21164	1.91932	0.345584	0.759901
						2017	12	17	351	13.7	11	12.35	76.5	23.309	5.03474	6.12809	1.08363	0.997334
						2017	12	18	352	17.1	7.1	12.1	71.5	19.6422	15.7138	9.93826	1.74281	2.46428
						2017	12	19	353	14.3	7.9	11.1	65	17.9015	9.16557	7.24602	1.22819	1.48392
						2017	12	20	354	15.1	8.2	11.65	63	14.9135	8.23226	6.26794	1.08263	1.39883
						2017	12	21	355	18.5	9.9	14.2	59.5	18.9472	13.0357	8.89026	1.66852	2.28025
						2017	12	22	356	15.8	8	11.9	67	11.4013	7.11442	5.09474	0.887456	1.26227
						2017	12	23	357	13.3	10.3	11.8	63	26.1423	6.27415	7.24477	1.25772	1.14164
						2017	12	24	358	12.9	9.5	11.2	54.5	32.7722	8.91403	9.66862	1.64449	1.45824
						2017	12	25	359	15.8	7.4	11.6	60	3.67213	2.46767	1.70285	0.293625	0.616142
						2017	12	26	360	17.9	4.6	11.25	63	6.64531	7.07061	3.87758	0.660655	1.21705
						2017	12	27	361	17.7	6	11.85	62	19.5776	18.3247	10.7145	1.86323	2.79305
						2017	12	28	362	14.7	5.7	10.2	73	10.744	7.73569	5.15713	0.846904	1.23289
						2017	12	29	363	16	5.8	10.9	83.5	19.275	15.7284	9.8495	1.65792	2.32465
						2017	12	30	364	12.5	6.3	9.4	94.5	16.6084	8.23775	6.61672	1.05555	1.2334
						2017	12	31	365	15	5.2	10.1	95.5	10.261	8.04466	5.13954	0.841001	1.26421
																	1299.14	2121.11
																	ETo-HS	ETo-TURC (Ousman Couly (2016)

[truncated: 2 more sheets: Monthly average, Calc. Rs. ]
