# Supplementary material for: Assessing of evapotranspiration models using limited climatic data in Southeast Anatolian Project Region of Turkey
Source: PeerJ. 2021 Jun 9;9:e11571. doi: 10.7717/peerj.11571 (PMC8197036; doi:10.7717/peerj.11571)
Supplement: Supplemental Information 7 [file peerj-09-11571-s007.xlsx]

## Sheet: 2008
	MARDİN					year	month	day	DOY	Tmax	Tmin	Tmean	Rhmean	Ra	Rs=0.16(Tmax-Tmin)^0.5*Ra	Rs=from meteorological station	ETo-HS	ETo-TURC (Ousman Couly (2016)
	DOY	246					#	#		°C	°C	°C	%	MJ m-2 day-1*(0.408 mm day-1)
	φ (-)	37.31	0.651182			2008	1	1	1	7.3	-1.9	2.7	70	7.3507	5.41011	3.56732	0.428908	0.354666
	tan(φ)		0.762072			2008	1	2	2	10.4	1.5	5.95	76.5	18.0523	12.8533	8.61685	1.20027	1.31565
	sin(φ)		0.606127			2008	1	3	3	10.1	2.8	6.45	72	20.5139	11.9801	8.86807	1.26127	1.31157
	cos(φ)		0.795368			2008	1	4	4	5.3	2.9	4.1	70.5	8.61485	1.65405	2.13537	0.274274	0.249146
	dr	0.984766		(1+0.033*cos(2*3.14/365*DOY))		2008	1	5	5	3	-3	0	84	6.12156	2.93835	2.39915	0.250464	0
	δ	0.120494		(0.409*sin(2*3.14/365*DOY-1.39))		2008	1	6	6	2.3	-3.1	-0.4	98	1.99324	0.861079	0.741099	0.0756299	-0.025064
	tan(δ)	0.121081				2008	1	7	7	1.6	-4.3	-1.35	88.5	6.33482	2.99004	2.46196	0.237528	-0.155751
	sin(δ)	0.120203				2008	1	8	8	0.1	-4.3	-2.1	72	28.968	10.1967	9.72221	0.895226	-0.620052
	cos(δ)	0.992749				2008	1	9	9	-0.8	-6.9	-3.85	63	4.78913	2.33709	1.89252	0.15484	-0.473878
	X	0.991486				2008	1	10	10	2	-3.9	-0.95	67	4.3525	2.05438	1.69155	0.167168	-0.0868697		-
	ωs (eq. 25)	1.49187		(acos{(-1*tan(-0.35)*tan(0.409*sin(2*3.14/365*DOY-1.39))))		2008	1	11	11	0.2	-5.2	-2.5	72	21.081	9.10701	7.83806	0.703345	-0.694214
	sin ωs	0.996887				2008	1	12	12	1.3	-5.9	-2.3	89	8.36766	4.81977	3.59245	0.32658	-0.387927
	sin φ*sin δ	-0.0728584		(sin(0.35)*sin(0.409*sin(2*3.14/365*DOY-1.39)))		2008	1	13	13	0	-5.3	-2.65	72.5	27.69	11.7405	10.1995	0.906277	-0.919983
	cos φ*cos δ	0.789601		(cos(0.35)*cos(0.409*sin(2*3.14/365*DOY-1.39))		2008	1	14	14	1.5	-4.4	-1.45	66	29.6056	13.9738	11.5059	1.10333	-0.532893
	Gsc	0.082				2008	1	15	15	5.3	-3.8	0.75	73.5	23.266	16.9376	11.2295	1.22173	0.280884
						2008	1	16	16	6.2	-0.4	2.9	70	25.7303	13.5856	10.5764	1.28403	0.787282
	Ra	25.1244				2008	1	17	17	7.9	-0.8	3.55	71	3.83272	2.66757	1.80878	0.226492	0.282248
						2008	1	18	18	6.4	0.5	3.45	67	7.33676	3.46295	2.85135	0.355367	0.32189
						2008	1	19	19	9.9	1.3	5.6	64.5	1.68654	1.16034	0.791343	0.108605	0.273912
						2008	1	20	20	5.8	0.8	3.3	78	34.6878	13.8751	12.4103	1.53579	0.892475
						2008	1	21	21	8	1.2	4.6	88.5	13.7884	7.50091	5.75294	0.755798	0.697788
						2008	1	22	22	11.1	0.2	5.65	80.5	2.04498	1.78322	1.08025	0.148571	0.328521
						2008	1	23	23	8	2.4	5.2	79	13.469	6.03412	5.09977	0.687933	0.648321
						2008	1	24	24	10.9	1.2	6.05	70.5	7.25957	5.63343	3.61757	0.506026	0.688137
						2008	1	25	25	9.7	2	5.85	64	16.4658	10.1429	7.3105	1.01402	1.064
						2008	1	26	26	10	2	6	66.5	23.8518	15.2651	10.7941	1.50671	1.53717
						2008	1	27	27	8.1	-1.3	3.4	74	22.6356	17.022	11.1039	1.38064	1.09478
						2008	1	28	28	3.1	0.1	1.6	76	49.4502	11.8681	13.7041	1.55926	0.41706
						2008	1	29	29	4.9	2.1	3.5	70.5	50.5759	11.329	13.5408	1.69157	0.787007
						2008	1	30	30	4.2	-0.9	1.65	72	34.2069	13.9564	12.36	1.40996	0.492958
						2008	1	31	31	1.4	-3	-0.8	88	29.6417	10.4339	9.94831	0.991896	-0.218727
						2008	2	1	32	1.3	-5.2	-1.95	87	2.03232	1.0568	0.829026	0.0770665	-0.145766
						2008	2	2	33	2	-4.2	-1.1	62	3.90958	1.93915	1.55756	0.152556	-0.0988447
						2008	2	3	34	3.8	-4.2	-0.2	83.5	30.5965	19.5818	13.8464	1.42928	-0.0907872
						2008	2	4	35	6.4	0.2	3.3	88.5	20.5568	10.1962	8.18977	1.0135	0.686818
						2008	2	5	36	6.7	0.9	3.8	82.5	9.02963	4.18975	3.4794	0.440784	0.393486
						2008	2	6	37	10.8	1.6	6.2	77.5	8.43777	6.2102	4.09489	0.576396	0.752499
						2008	2	7	38	10.5	3.9	7.2	66	7.39516	3.90464	3.03976	0.445705	0.602705
						2008	2	8	39	6.9	1	3.95	87	25.4686	12.0212	9.89807	1.26263	0.911827
						2008	2	9	40	7.2	1	4.1	89.5	18.539	9.19533	7.38587	0.948667	0.750977
						2008	2	10	41	12.2	4.3	8.25	77	27.1771	17.1759	12.2219	1.86729	2.11925
						2008	2	11	42	13.4	6.3	9.85	84.5	22.598	12.8357	9.63429	1.56237	1.83403
						2008	2	12	43	7.7	2.3	5	72	12.1621	5.25404	4.52196	0.604686	0.569163
						2008	2	13	44	9.3	0.4	4.85	68	22.3856	15.9385	10.6852	1.41945	1.36554
						2008	2	14	45	5.2	1	3.1	73.5	35.2426	11.8415	11.5561	1.41653	0.739678
						2008	2	15	46	3.5	-4.5	-0.5	74.5	33.918	21.7075	15.3495	1.55743	-0.254387
						2008	2	16	47	4.3	-2	1.15	85.5	37.064	18.6803	14.8848	1.65432	0.458489
						2008	2	17	48	6.5	1.3	3.9	82	27.5303	11.4526	10.0446	1.27838	0.866298
						2008	2	18	49	9.2	4	6.6	91.5	37.5372	15.6155	13.6957	1.95993	1.6771
						2008	2	19	50	7.2	-4.6	1.3	78	23.6539	22.3293	13.0006	1.45635	0.603742
						2008	2	20	51	0.8	-7.6	-3.4	89	21.1461	14.2102	9.80595	0.828172	-1.48107
						2008	2	21	52	3.2	-4.2	-0.5	71	37.0267	21.9198	16.1158	1.63518	-0.256657
						2008	2	22	53	7	-2.3	2.35	73	33.3375	24.8031	16.2665	1.92237	1.1292
						2008	2	23	54	10.1	2.5	6.3	66.5	35.3687	21.5042	15.6008	2.20511	2.16335
						2008	2	24	55	8.8	4.2	6.5	57.5	42.7532	15.7332	14.6712	2.09094	1.6704
						2008	2	25	56	7.9	1.7	4.8	67.5	33.862	16.7956	13.4905	1.78815	1.41928
						2008	2	26	57	9.8	1.7	5.75	68	23.8604	15.4615	10.8653	1.50072	1.50774
						2008	2	27	58	12	2.8	7.4	68	27.3322	20.1165	13.2644	1.96045	2.27418
						2008	2	28	59	14.2	6.1	10.15	69	26.8671	17.4099	12.2344	2.00555	2.43962
						2008	3	1	60	14.9	7.4	11.15	66.5	28.4371	17.0623	12.4605	2.11569	2.53154
						2008	3	2	61	15.5	7	11.25	68	24.8271	16.8824	11.5812	1.97319	2.52062
						2008	3	3	62	14.4	7.2	10.8	72	33.7242	19.4251	14.4786	2.42863	2.79196
						2008	3	4	63	10.6	3.9	7.25	73	31.2395	16.7444	12.9378	1.9008	1.90248
						2008	3	5	64	10.9	1.9	6.4	41	36.9983	26.6387	17.7592	2.52061	3.00589
						2008	3	6	65	16.9	5.8	11.35	40	31.2218	27.725	16.6433	2.84542	4.54992
						2008	3	7	66	19.5	9.8	14.65	32	5.1674	4.0099	2.575	0.490073	1.17458
						2008	3	8	67	20.2	12.8	16.5	37.5	29.8118	17.6486	12.9755	2.61028	3.77753
						2008	3	9	68	21.4	12.2	16.8	40.5	25.6369	18.8687	12.4417	2.52478	3.89832
						2008	3	10	69	23.2	14.4	18.8	43	38.4264	27.0522	18.2386	3.91507	5.52736
						2008	3	11	70	20.2	17.2	18.7	50.5	54.7307	13.1354	15.1674	3.24692	2.61903
						2008	3	12	71	20.2	13.7	16.95	72	45.5732	23.6981	18.5903	3.78886	4.24111
						2008	3	13	72	16.2	8.6	12.4	68	40.3664	24.5428	17.8052	3.15371	3.73637
						2008	3	14	73	14.9	9	11.95	62	31.868	15.0417	12.3851	2.16101	2.35489
						2008	3	15	74	9.2	3.2	6.2	58.5	42.8936	20.5889	16.8108	2.36629	2.05608
						2008	3	16	75	9	1	5	58.5	39.4137	25.2248	17.8366	2.38515	2.1169
						2008	3	17	76	12.8	3	7.9	63	28.5136	22.3546	14.2819	2.15271	2.61419
						2008	3	18	77	14.6	5.5	10.05	46.5	9.18667	6.6879	4.43403	0.724256	1.1463
						2008	3	19	78	17	7.4	12.2	64	39.9999	30.7199	19.8296	3.48902	4.56203
						2008	3	20	79	19.2	10.7	14.95	61.5	22.2017	15.0971	10.3565	1.98927	2.65956
						2008	3	21	80	16.5	9.9	13.2	63	43.6528	23.0487	17.9434	3.26238	3.64779
						2008	3	22	81	14.9	9.2	12.05	62.5	43.7339	19.9427	16.7061	2.92475	3.04263
						2008	3	23	82	22	13.5	17.75	50	34.9518	23.7672	16.3042	3.39943	4.34441
						2008	3	24	83	25.6	15.2	20.4	55	31.0626	25.8441	16.0278	3.59092	4.99026
						2008	3	25	84	27.5	18.7	23.1	60	24.4532	17.215	11.6064	2.78412	3.62843
						2008	3	26	85	24.7	17.9	21.3	52.5	41.0643	22.339	17.1332	3.92901	4.44365
						2008	3	27	86	20.2	11.2	15.7	48.5	32.6324	23.4954	15.6636	3.07754	4.14307
						2008	3	28	87	19.6	10.2	14.9	80.5	36.8341	27.6993	18.069	3.46537	4.60189
						2008	3	29	88	18.5	9.5	14	67.5	44.0682	31.7291	21.1527	3.94513	5.0612
						2008	3	30	89	21.7	11.3	16.5	66	35.1767	29.267	18.1506	3.65136	5.09179
						2008	3	31	90	23.6	13.8	18.7	66	21.5754	16.9151	10.8066	2.31341	3.26921
						2008	4	1	91	18.6	10.8	14.7	62.5	6.77445	4.22726	3.0272	0.577022	0.969284
						2008	4	2	92	13.2	8	10.6	69.5	18.8375	7.83638	6.87296	1.1448	1.27414
						2008	4	3	93	14.5	3.9	9.2	65.5	35.9766	30.5082	18.741	2.96773	3.84173
						2008	4	4	94	17.5	8	12.75	63.5	13.5505	10.2984	6.68245	1.19733	1.7645
						2008	4	5	95	17.6	10.7	14.15	65	36.6114	20.2095	15.3872	2.88336	3.35563
						2008	4	6	96	18.1	8	13.05	65.5	31.2241	25.2291	15.8771	2.87273	3.94009
						2008	4	7	97	20.9	10.6	15.75	39	41.9028	34.5279	21.517	4.23391	6.72787
						2008	4	8	98	17.2	10	13.6	56.5	33.7047	19.4139	14.4703	2.66486	3.16995
						2008	4	9	99	18.1	9	13.55	56.5	37.5795	27.3579	18.1381	3.33501	4.3326
						2008	4	10	100	17.8	8	12.9	70	24.7101	19.3727	12.3768	2.22851	3.07632
						2008	4	11	101	18	9.5	13.75	59	48.4155	32.9225	22.5847	4.17909	5.19099
						2008	4	12	102	21.3	13	17.15	63.5	45.521	30.2259	20.9832	4.30116	5.34394
						2008	4	13	103	21.3	12.8	17.05	55.5	41.9529	28.528	19.57	4.00002	5.04934
						2008	4	14	104	26.2	13	19.6	48.5	10.2423	10.8158	5.95391	1.306	2.31492
						2008	4	15	105	30.1	19	24.55	41.5	38.0317	33.7722	20.2735	5.03558	7.73883
						2008	4	16	106	30	22.5	26.25	45.5	40.6108	24.3665	17.7948	4.59733	5.55466
						2008	4	17	107	28	21.4	24.7	55	49.1075	25.9288	20.1855	5.03149	5.40402
						2008	4	18	108	21.4	9.9	15.65	63.5	38.4062	35.3337	20.8387	4.08822	5.92369
						2008	4	19	109	20.8	8.4	14.6	84	38.0563	37.7519	21.4416	4.07447	6.09204
						2008	4	20	110	22.2	14.6	18.4	74.5	42.2697	25.7	18.6447	3.95851	4.74593
						2008	4	21	111	23.1	9.2	16.15	69	37.2499	41.4218	22.2204	4.42446	6.99332
						2008	4	22	112	28.1	17	22.55	71.5	30.1144	26.7415	16.053	3.79898	5.36743
						2008	4	23	113	30.2	19.8	25	62	29.529	24.5681	15.2365	3.82469	5.16501
						2008	4	24	114	33.2	24.4	28.8	56	11.3444	7.98648	5.38448	1.47163	2.05394
						2008	4	25	115	33.5	23.7	28.6	44	42.6324	33.4238	21.3537	5.81111	7.84069
						2008	4	26	116	33.6	23.4	28.5	38.5	47.8106	39.0134	24.4311	6.63427	9.71974
						2008	4	27	117	32.6	25	28.8	32.5	44.1112	26.8196	19.457	5.31777	7.36601
						2008	4	28	118	29.2	20.3	24.75	32.5	40.8677	29.0978	19.5072	4.86814	7.5248
						2008	4	29	119	28	19.5	23.75	51	42.0068	28.5646	19.5952	4.77516	5.82438
						2008	4	30	120	20.2	11.9	16.05	32.5	48.8591	32.4424	22.5219	4.47127	6.91692
						2008	5	1	121	19.2	12.8	16	47.5	42.9798	22.0056	17.397	3.44873	3.99299
						2008	5	2	122	20.2	10.6	15.4	53	29.6199	22.7481	14.6838	2.8592	3.90056
						2008	5	3	123	23	13.9	18.45	51	51.0602	37.1718	24.6447	5.23961	6.71324
						2008	5	4	124	22.6	13.4	18	53	35.5456	26.1616	17.2504	3.62202	4.77709
						2008	5	5	125	21.3	11.3	16.3	40	26.514	21.2112	13.4151	2.68298	4.29908
						2008	5	6	126	24.7	16	20.35	31.5	40.7227	28.343	19.2183	4.3001	6.86635
						2008	5	7	127	20.2	9.2	14.7	32.5	38.0385	33.4739	20.1855	3.84761	6.82091
						2008	5	8	128	18	7.3	12.65	28.5	48.5121	41.5264	25.39	4.53438	8.08593
						2008	5	9	129	16.3	9.9	13.1	54	61.9871	31.7374	25.0906	4.54713	4.88872
						2008	5	10	130	15	8.1	11.55	67.5	54.9519	30.3334	23.0955	3.97561	4.37259
						2008	5	11	131	17	8.1	12.55	66	50.8281	36.1896	24.2616	4.31863	5.40569
						2008	5	12	132	19	10.4	14.7	74	49.7662	34.2391	23.3509	4.45097	5.57414
						2008	5	13	133	20.7	12.8	16.75	70.5	57.4546	36.3113	25.838	5.2357	6.28028
						2008	5	14	134	21.4	11.2	16.3	60	49.8385	40.6682	25.4674	5.0934	6.90279
						2008	5	15	135	22.4	10.8	16.6	65	40.7759	37.84	22.2204	4.4831	6.50252
						2008	5	16	136	21.2	14.1	17.65	55	60.7819	34.5241	25.9133	5.38775	6.13581
						2008	5	17	137	23.6	12.1	17.85	36	39.6332	36.4625	21.5044	4.4963	7.79289
						2008	5	18	138	24.6	15.9	20.25	38	54.5009	37.9326	25.7207	5.73992	8.34928
						2008	5	19	139	22.3	12.4	17.35	28	44.3128	35.0958	22.3083	4.59897	8.12556
						2008	5	20	140	25.2	14.5	19.85	25	48.5281	41.5401	25.3983	5.60839	10.4552
						2008	5	21	141	28.7	16.1	22.4	36	43.2601	43.6062	24.5693	5.79278	10.1812
						2008	5	22	142	29.9	20	24.95	50	47.9058	37.9414	24.1171	6.04686	7.75025
						2008	5	23	143	32.5	20.7	26.6	47.5	45.4339	42.8896	24.9713	6.50267	9.23433
						2008	5	24	144	32.9	23.8	28.35	49.5	49.3426	35.9214	23.8157	6.44618	7.76123
						2008	5	25	145	32.7	23.7	28.2	46	30.9315	22.2707	14.8471	4.0056	5.21134
						2008	5	26	146	26.2	20.1	23.15	39	60.4575	29.5032	23.891	5.73795	6.877
						2008	5	27	147	24.6	15.7	20.15	48.5	49.9465	35.5619	23.8408	5.3064	6.8345
						2008	5	28	148	26.3	13.6	19.95	38	45.0501	45.7709	25.6872	5.68725	9.92097
						2008	5	29	149	27.4	15.9	21.65	52	45.7449	42.0853	24.8205	5.74283	8.08956
						2008	5	30	150	30.4	17.3	23.85	51.5	43.1098	45.179	24.965	6.09838	8.99572
						2008	5	31	151	26.9	14.8	20.85	50	37.6977	36.4914	20.9811	4.75603	6.95594
						2008	6	1	152	29	15.1	22.05	29.5	35.818	39.8296	21.3663	4.99373	9.99884
						2008	6	2	153	31	19.9	25.45	30	44.8377	39.8159	23.9015	6.06288	10.5087
						2008	6	3	154	33	23.3	28.15	49	47.809	37.0998	23.824	6.4205	8.03882
						2008	6	4	155	29	18.8	23.9	60	47.2206	38.532	24.1297	5.90141	7.73698
						2008	6	5	156	29.4	15.7	22.55	52.5	40.7659	44.6795	24.1422	5.71333	8.70684
						2008	6	6	157	31.2	19.8	25.5	51	51.0604	46.5671	27.584	7.00507	9.49714
						2008	6	7	158	30.8	22.1	26.45	52	54.1638	37.698	25.5616	6.63392	7.87073
						2008	6	8	159	28.8	19	23.9	56.5	52.7137	41.3276	26.4032	6.45745	8.26943
						2008	6	9	160	29.8	17.2	23.5	36	48.347	48.7337	27.4583	6.65108	11.5403
						2008	6	10	161	30.4	19.8	25.1	50	50.9829	43.2335	26.5581	6.68225	8.79457
						2008	6	11	162	30.5	21.6	26.05	56	56.0517	39.9088	26.7549	6.88084	8.26215
						2008	6	12	163	27.4	16.1	21.75	53	48.9738	44.2723	26.3404	6.10994	8.50606
						2008	6	13	164	25.7	15.7	20.7	45.5	50.2227	40.1782	25.4109	5.73785	8.08603
						2008	6	14	165	28	16.1	22.05	49	48.7624	46.4218	26.914	6.29036	9.078
						2008	6	15	166	31.3	19	25.15	51.5	49.0897	48.3043	27.5463	6.93895	9.78577
						2008	6	16	167	32.4	19.9	26.15	39	48.7768	48.7768	27.5923	7.11239	11.5954
						2008	6	17	168	32.1	20	26.05	37.5	48.0644	46.5263	26.7507	6.87976	11.2718
						2008	6	18	169	32.1	17.1	24.6	38	43.135	51.7621	26.7298	6.64706	12.1484
						2008	6	19	170	32.9	19.3	26.1	36.5	45.0809	49.048	26.6	6.8488	12.0086
						2008	6	20	171	34	19.5	26.75	45	42.7798	49.6245	26.0641	6.81017	11.0054
						2008	6	21	172	36	22.6	29.3	39	42.2921	45.3371	24.7703	6.84258	11.2522
						2008	6	22	173	35	22.9	28.95	43.5	49.2003	47.6259	27.383	7.50811	11.0946
						2008	6	23	174	32.6	21.1	26.85	33.5	42.2955	38.9118	22.9489	6.00969	10.077
						2008	6	24	175	32.7	18.8	25.75	41	41.2507	45.8708	24.607	6.28514	10.6029
						2008	6	25	176	33.2	19.6	26.4	45	41.2987	44.933	24.3683	6.31708	9.95953
						2008	6	26	177	36.7	22.1	29.4	47	40.2394	46.9996	24.6007	6.81017	10.5085
						2008	6	27	178	38.3	25.2	31.75	40.5	42.5567	44.5994	24.6447	7.16201	11.1638
						2008	6	28	179	40	28.8	34.4	49.5	45.4855	40.755	24.3558	7.45659	9.31504
						2008	6	29	180	38.2	27.6	32.9	49.5	45.7183	38.7691	23.8157	7.08172	8.76197
						2008	6	30	181	37.1	25.8	31.45	49	40.1459	36.2919	21.5924	6.23698	8.17115
						2008	7	1	182	35.3	22.9	29.1	48	39.773	39.4548	22.4088	6.16396	8.74112
						2008	7	2	183	34	18.8	26.4	45.5	28.6877	34.8842	17.8952	4.63904	7.77898
						2008	7	3	184	35.3	21.5	28.4	47	39.7515	43.8857	23.6272	6.40211	9.7262
						2008	7	4	185	34.1	22.4	28.25	48.5	46.3391	43.3734	25.3607	6.84949	9.40295
						2008	7	5	186	32.9	18.4	25.65	39	40.7593	47.2808	24.8331	6.32832	11.175
						2008	7	6	187	34.7	22.2	28.45	36.5	38.4811	38.4811	21.7682	5.90476	9.82335
						2008	7	7	188	35.7	25.1	30.4	35	47.9366	40.6503	24.9713	7.0592	10.773
						2008	7	8	189	34.6	24	29.3	52	49.7692	42.2043	25.9259	7.16181	9.08183
						2008	7	9	190	31.9	18.2	25.05	42	42.5052	46.5857	25.1722	6.32617	10.5166
						2008	7	10	191	36	21.7	28.85	40.5	42.0814	48.1411	25.4611	6.96623	11.6354
						2008	7	11	192	36.8	26.2	31.5	40	45.5495	38.6259	23.7277	6.86074	9.77183
						2008	7	12	193	37.6	27.2	32.4	40	46.4235	38.6244	23.9538	7.05256	9.8598
						2008	7	13	194	39.3	26.5	32.9	40.5	41.0776	42.0635	23.5142	6.99207	10.6772
						2008	7	14	195	35.7	26.5	31.1	32.5	44.4148	32.6893	21.5547	6.18185	9.09184
						2008	7	15	196	35	24.7	29.85	36	45.0339	37.1079	23.1248	6.46262	9.70483
						2008	7	16	197	36.5	24.3	30.4	29.5	42.615	41.5923	23.8157	6.73252	11.7229
						2008	7	17	198	38	22.7	30.35	40.5	37.3512	45.7179	23.376	6.60138	11.2645
						2008	7	18	199	39	29	34	48	48.4104	38.7283	24.4939	7.44143	9.03097
						2008	7	19	200	36.8	25.9	31.35	38	45.703	39.853	24.1422	6.95936	10.3021
						2008	7	20	201	39	26.1	32.55	44	41.2897	42.6109	23.7277	7.00686	10.299
						2008	7	21	202	41	29.6	35.3	39	42.5503	38.8059	22.9866	7.15876	10.2952
						2008	7	22	203	39	30	34.5	38.5	48.229	34.7249	23.1499	7.101	9.26102
						2008	7	23	204	37	28.1	32.55	45.5	48.4203	34.4752	23.1122	6.82511	8.25826
						2008	7	24	205	39	28.3	33.65	29	44.0161	37.6778	23.0369	6.95147	11.0851
						2008	7	25	206	38.8	29.6	34.2	40.5	39.1865	28.8412	19.0174	5.79991	7.56988
						2008	7	26	207	39	30.8	34.9	42.5	39.2957	25.7779	18.0041	5.56481	6.68952
						2008	7	27	208	38	28.4	33.2	47	35.0675	26.9318	17.3844	5.19994	6.46253
						2008	7	28	209	31.2	22.7	26.95	42	34.6466	23.5597	16.1618	4.24181	5.69203
						2008	7	29	210	36	22.7	29.35	39	37.0691	39.4415	21.63	5.98146	9.85917
						2008	7	30	211	37.6	27	32.3	48.5	43.741	37.0924	22.7857	6.69526	8.47231
						2008	7	31	212	39.8	26.6	33.2	45	27.0102	28.5227	15.7012	4.69648	7.00355
						2008	8	1	213	40.2	26	33.1	42	33.2605	37.7839	20.0536	5.98658	9.4783
						2008	8	2	214	38.3	29.1	33.7	25.5	40.2477	29.6223	19.5324	5.8997	9.18383
						2008	8	3	215	35.3	27.3	31.3	19	42.4947	27.1966	19.2309	5.53795	8.85558
						2008	8	4	216	36.5	25.9	31.2	29	39.4248	33.4322	20.5372	5.90209	9.66757
						2008	8	5	217	38	28.2	33.1	38	42.507	33.3255	21.2909	6.35594	8.85022
						2008	8	6	218	38.5	27.8	33.15	45.5	38.7121	33.1376	20.2609	6.0544	8.00184
						2008	8	7	219	36.8	27.6	32.2	47.5	43.8195	32.2511	21.2658	6.23619	7.52195
						2008	8	8	220	37	27	32	41.5	39.6469	31.7175	20.0599	5.85904	8.002
						2008	8	9	221	35.6	24.2	29.9	45.5	39.8997	36.3885	21.5547	6.03015	8.45401
						2008	8	10	222	37.5	24.1	30.8	48	36.3085	38.9228	21.2658	6.06157	8.79428
						2008	8	11	223	36	26.2	31.1	53.5	43.1089	33.7974	21.5924	6.19266	7.50521
						2008	8	12	224	36.8	26	31.4	49	40.3361	34.8504	21.2092	6.1201	7.86022
						2008	8	13	225	36.1	27.4	31.75	47.5	43.9432	30.5845	20.7382	6.02675	7.12479
						2008	8	14	226	33.3	23.4	28.35	50.5	40.67	32.2106	20.4744	5.54181	6.95389
						2008	8	15	227	35.5	23.9	29.7	48	35.9353	33.348	19.5826	5.45547	7.50782
						2008	8	16	228	36	25.1	30.55	28	38.1413	33.2592	20.1478	5.71338	9.65948
						2008	8	17	229	33.2	24.8	29	33	40.5767	27.2675	18.8164	5.16476	7.455
						2008	8	18	230	35.3	26.9	31.1	38.5	42.7166	28.7055	19.8087	5.6811	7.4984
						2008	8	19	231	36.2	27.3	31.75	48	43.0519	30.653	20.5498	5.97199	7.09049
						2008	8	20	232	39.3	28	33.65	40.5	38.1841	34.5184	20.5372	6.1972	8.91485
						2008	8	21	233	39	29.9	34.45	48.5	43.0967	31.3744	20.801	6.37439	7.38202
						2008	8	22	234	37.7	28.2	32.95	49.5	41.6447	31.65	20.5372	6.11288	7.23877
						2008	8	23	235	38.9	29	33.95	53	40.7698	32.2897	20.5247	6.22952	7.39181
						2008	8	24	236	38.9	30.7	34.8	52	44.1391	28.9552	20.2232	6.23884	6.72522
						2008	8	25	237	32.2	22.4	27.3	30.5	38.6701	30.3174	19.3691	5.12334	8.28997
						2008	8	26	238	36	25.5	30.75	23	35.8326	30.0993	18.5777	5.28993	9.29398
						2008	8	27	239	38.6	26.8	32.7	31	33.4583	31.5847	18.3893	5.44659	9.09885
						2008	8	28	240	36.8	27	31.9	33.5	37.3912	29.3147	18.7285	5.45917	8.18261
						2008	8	29	241	39.1	28.5	33.8	24.5	27.537	23.3514	14.3447	4.34118	7.45256
						2008	8	30	242	39.9	30.8	35.35	42.5	36.5905	26.6379	17.6608	5.5053	6.92244
						2008	8	31	243	36	29.5	32.75	36.5	36.3354	18.8944	14.822	4.39436	5.32212
						2008	9	1	244	33.5	24.6	29.05	41.5	38.052	27.093	18.1632	4.9908	6.69058
						2008	9	2	245	34	25.2	29.6	42	36.6797	25.8225	17.4095	4.83987	6.39903
						2008	9	3	246	37.8	26.3	32.05	45.5	31.2528	28.7526	16.9573	4.95782	6.93169
						2008	9	4	247	36.8	26.5	31.65	43	27.9474	23.0287	14.3509	4.16212	5.8113
						2008	9	5	248	35.4	25.7	30.55	22.5	27.1478	21.0667	13.5282	3.83623	6.70606
						2008	9	6	249	37	26.4	31.7	20.5	27.9952	23.7399	14.5833	4.23379	7.72596
						2008	9	7	250	37.1	26.4	31.75	20.5	29.8561	25.5568	15.6259	4.54105	8.27359
						2008	9	8	251	35.6	25	30.3	18	30.2136	25.6211	15.7389	4.44006	8.37264
						2008	9	9	252	33.5	26	29.75	15.5	30.5297	18.3178	13.3775	3.73072	6.27872
						2008	9	10	253	32.2	24.8	28.5	16	37.7482	22.3469	16.4298	4.4615	7.37393
						2008	9	11	254	31.7	24	27.85	22	37.2884	22.9697	16.5554	4.4325	7.0687
						2008	9	12	255	29.1	19	24.05	40	31.0759	25.1094	15.8017	3.87854	5.9348
						2008	9	13	256	29.8	20.9	25.35	43	33.2626	23.683	15.8771	4.01809	5.52145
						2008	9	14	257	32.3	22.8	27.55	19	28.298	21.5065	13.9553	3.71179	6.83369
						2008	9	15	258	30	22.1	26.05	27	30.5847	19.3296	13.7543	3.53733	5.59824
						2008	9	16	259	32.1	20.9	26.5	46.5	27.3758	24.5287	14.6587	3.80861	5.53268
						2008	9	17	260	33	24.9	28.95	59.5	31.6943	20.5379	14.4326	3.95725	4.62058
						2008	9	18	261	33.1	25	29.05	41.5	32.9356	21.3423	14.9978	4.12103	5.37215
						2008	9	19	262	30.4	23.4	26.9	66	26.5421	14.8636	11.2358	2.94564	3.37413
						2008	9	20	263	28	20	24	43.5	23.6621	15.1438	10.7083	2.6252	3.59295
						2008	9	21	264	28.5	18.8	23.65	60	25.4337	19.7366	12.674	3.08112	4.14027
						2008	9	22	265	30.7	19.3	25	47.5	16.6016	15.1407	8.96855	2.2513	3.45767
						2008	9	23	266	27.1	20	23.55	42.5	34.7073	19.7137	14.7969	3.5885	4.57154
						2008	9	24	267	21.8	13.7	17.75	50.5	27.8325	18.0355	12.674	2.64255	3.38139
						2008	9	25	268	23.5	10.4	16.95	39.5	17.656	18.5035	10.2247	2.08387	3.89483
						2008	9	26	269	26.8	15.2	21	54	27.5681	25.5832	15.023	3.41865	5.00423
						2008	9	27	270	27.2	15.8	21.5	51.5	26.9718	24.5983	14.5708	3.35848	4.87335
						2008	9	28	271	20.1	15.1	17.6	57	36.2326	14.493	12.963	2.69138	2.77537
						2008	9	29	272	22.8	13.3	18.05	53	27.0245	20.5386	13.3272	2.80218	3.83112
						2008	9	30	273	23.5	15	19.25	49.5	10.3132	7.01298	4.81086	1.04539	1.59737
						2008	10	1	274	19.5	13.6	16.55	55	32.272	15.2324	12.5422	2.52678	2.81688
						2008	10	2	275	19.1	9.9	14.5	41	8.51542	6.26735	4.13257	0.782872	1.43716
						2008	10	3	276	23.2	13.5	18.35	56	7.96536	6.18112	3.96928	0.841565	1.4108
						2008	10	4	277	26.7	14.8	20.75	56.5	12.5851	11.981	6.94623	1.57051	2.53179
						2008	10	5	278	27	18.1	22.55	48.5	15.9208	11.3356	7.5994	1.79842	2.55294
						2008	10	6	279	27.2	18.9	23.05	54.5	12.208	8.10609	5.62733	1.34822	1.91475
						2008	10	7	280	26	17.1	21.55	50.5	8.65775	6.16432	4.13257	0.953746	1.5087
						2008	10	8	281	24	16.3	20.15	52.5	26.1981	16.138	11.6315	2.5889	3.2393
						2008	10	9	282	23.6	15.8	19.7	49	19.0303	11.8749	8.5038	1.8703	2.49285
						2008	10	10	283	24	15.5	19.75	31	8.21286	5.58475	3.8311	0.843727	1.71921
						2008	10	11	284	24.2	14.8	19.5	30	19.9726	15.0194	9.79758	2.14336	3.8544
						2008	10	12	285	25.5	14.8	20.15	34	19.536	16.7229	10.2247	2.27577	4.1074
						2008	10	13	286	25.8	17.4	21.6	53	24.5139	16.4734	11.3677	2.62686	3.39618
						2008	10	14	287	30.3	21.8	26.05	47.5	25.2848	17.1937	11.7948	3.03338	3.92904
						2008	10	15	288	33.2	21.4	27.3	34.5	20.043	18.9206	11.016	2.91386	5.13441
						2008	10	16	289	32.5	22.1	27.3	29.5	18.769	15.6158	9.68453	2.56167	4.57985
						2008	10	17	290	23.1	15	19.05	23.5	21.433	13.8886	9.7599	2.10936	3.82038
						2008	10	18	291	23.6	13	18.3	25	16.6621	14.1294	8.67965	1.83771	3.74999
						2008	10	19	292	23.9	14.8	19.35	51	12.4918	9.09403	6.02928	1.31369	1.95305
						2008	10	20	293	24	16	20	45.5	21.0392	13.4651	9.52124	2.11083	2.93261
						2008	10	21	294	23.9	15.9	19.9	52.5	20.373	13.0387	9.21977	2.03859	2.67419
						2008	10	22	295	26.3	17.7	22	41	18.5251	12.7453	8.69221	2.029	3.08608
						2008	10	23	296	23.7	13.2	18.45	50.5	16.6686	14.0016	8.64197	1.83734	2.75145
						2008	10	24	297	21.9	14	17.95	53.5	21.2836	13.4513	9.57148	2.00689	2.62456
						2008	10	25	298	21.2	12	16.6	52.5	21.0686	15.5065	10.2247	2.06289	2.86555
						2008	10	26	299	19.3	14	16.65	51.5	25.1494	10.6634	9.26374	1.87173	2.07983
						2008	10	27	300	20.2	11.7	15.95	57	17.5028	11.9019	8.16465	1.61614	2.23532
						2008	10	28	301	20	13.3	16.65	53.5	19.9569	10.6969	8.26514	1.66996	2.08529
						2008	10	29	302	16.2	9.8	13	51	22.7157	11.6304	9.19465	1.66094	1.97476
						2008	10	30	303	15	9	12	51	21.2812	10.215	8.3405	1.45773	1.69535
						2008	10	31	304	17.5	10.9	14.2	45.5	23.7134	12.5207	9.74734	1.82938	2.34421
						2008	11	1	305	18.4	10.8	14.6	23	18.2254	11.0811	8.03904	1.52763	2.79072
						2008	11	2	306	18.2	10.4	14.3	25	17.934	11.1908	8.01392	1.50875	2.72697
						2008	11	3	307	18.7	11.6	15.15	26.5	20.624	11.7144	8.7927	1.6992	2.87223
						2008	11	4	308	18.6	11	14.8	26	17.2002	10.4577	7.58684	1.4506	2.59419
						2008	11	5	309	16.9	9.6	13.25	42.5	18.3637	10.7244	7.93855	1.44568	2.06282
						2008	11	6	310	17.8	10.9	14.35	47.5	18.231	10.0635	7.66221	1.44478	1.90786
						2008	11	7	311	18	11.1	14.55	62.5	19.2471	10.6244	8.08928	1.5348	1.94072
						2008	11	8	312	19.1	12.1	15.6	57	12.6405	7.07869	5.35099	1.04821	1.44901
						2008	11	9	313	19.7	11.4	15.55	55.5	17.0039	11.2906	7.83806	1.53311	2.11134
						2008	11	10	314	17.4	12.2	14.8	55	22.6531	9.42371	8.26514	1.58029	1.77265
						2008	11	11	315	18	11	14.5	53	21.7203	12.1634	9.19465	1.74183	2.17183
						2008	11	12	316	17.2	8.8	13	40.5	17.9859	12.0865	8.3405	1.50665	2.31732
						2008	11	13	317	16.8	10.1	13.45	39	23.5358	12.6152	9.74734	1.7865	2.49378
						2008	11	14	318	15.9	9.3	12.6	44	19.5575	10.3263	8.03904	1.43333	1.9078
						2008	11	15	319	15.4	9.8	12.6	55	21.1656	9.4822	8.01392	1.42885	1.63772
						2008	11	16	320	15.1	8.8	11.95	66	21.8943	11.0348	8.7927	1.53418	1.80411
						2008	11	17	321	17.3	9	13.15	71.5	16.4589	10.9287	7.58684	1.37718	1.88529
						2008	11	18	322	16.5	8.9	12.7	34.5	17.9976	10.9425	7.93855	1.42007	2.26247
						2008	11	19	323	15.2	6.9	11.05	36	16.6224	11.0373	7.66221	1.29649	2.07144
						2008	11	20	324	14.3	8.8	11.55	48	21.558	9.48553	8.08928	1.39247	1.60566
						2008	11	21	325	14	8	11	50	13.6533	6.55359	5.35099	0.903846	1.13364
						2008	11	22	326	10.6	5.8	8.2	40.5	22.3598	8.58617	7.83806	1.19523	1.32853
						2008	11	23	327	9.5	7.3	8.4	41.5	41.0728	7.22882	9.74734	1.4978	1.16294
						2008	11	24	328	13.9	7.8	10.85	47.5	20.3432	9.92748	8.03904	1.35082	1.61951
						2008	11	25	329	16.3	7.2	11.75	59	16.6037	12.0875	8.01392	1.3889	1.93052
						2008	11	26	330	14.9	10.1	12.5	64.5	25.0831	9.63192	8.7927	1.56255	1.65173
						2008	11	27	331	15.8	8.4	12.1	66.5	17.4311	10.3192	7.58684	1.33046	1.7176
						2008	11	28	332	17.6	9.1	13.35	69.5	17.7182	12.0484	8.26514	1.51	2.06391
						2008	11	29	333	13	6.8	9.9	55.5	23.0791	11.4472	9.19465	1.49377	1.66851
						2008	11	30	334	9.2	5.5	7.35	58	27.1001	8.02164	8.3405	1.23026	1.03084
						2008	12	1	335	11.9	4.4	8.15	58.5	22.2451	13.3471	9.74734	1.48351	1.68474
						2008	12	2	336	12.6	6	9.3	63	19.5575	10.3263	8.03904	1.27774	1.4731
						2008	12	3	337	12.7	7	9.85	32.5	20.9791	9.56648	8.01392	1.2996	1.7904
						2008	12	4	338	12.7	6	9.35	35.5	21.2307	11.3797	8.7927	1.4001	1.93549
						2008	12	5	339	13.8	6.8	10.3	28	17.9222	10.0365	7.58684	1.25036	2.01142
						2008	12	6	340	17.8	8.2	13	59.5	16.0135	12.2984	7.93855	1.43404	2.07089
						2008	12	7	341	14	8.8	11.4	37.5	21.0006	8.73626	7.66221	1.31221	1.70804
						2008	12	8	342	15.9	8.8	12.35	35	18.9741	10.7773	8.08928	1.43043	2.18715
						2008	12	9	343	13	6.3	9.65	40.5	12.9204	6.92534	5.35099	0.861478	1.24258
						2008	12	10	344	8.8	4.9	6.85	68	24.806	7.73947	7.83806	1.13317	0.95528
						2008	12	11	345	6.6	1.7	4.15	48	27.5212	10.7883	9.74734	1.25484	0.889887
						2008	12	12	346	5.3	0.1	2.7	47	22.0335	9.16592	8.03904	0.966554	0.555083
						2008	12	13	347	6.1	0.7	3.4	47	21.554	9.31133	8.01392	0.996435	0.681088
						2008	12	14	348	9.9	1	5.45	41	18.4207	13.1156	8.7927	1.19898	1.41774
						2008	12	15	349	6.8	1.5	4.15	57.5	20.597	8.73311	7.58684	0.976706	0.727098
						2008	12	16	350	5	-1	2	67.5	23.4606	11.2611	9.19465	1.06775	0.486923
						2008	12	17	351	5.4	-1.8	1.8	62.5	19.427	11.19	8.3405	0.958774	0.441084
						2008	12	18	352	9	-0.7	4.15	58.5	19.5605	15.179	9.74734	1.25484	1.16013
						2008	12	19	353	8.2	2.5	5.35	56.5	21.0449	9.59647	8.03904	1.0915	0.952433
						2008	12	20	354	10.3	3.5	6.9	53	19.2075	10.4489	8.01392	1.16094	1.22469
						2008	12	21	355	10.6	1.8	6.2	37.5	18.5251	13.0417	8.7927	1.23766	1.61682
						2008	12	22	356	7	3.2	5.1	38.5	24.3248	7.39474	7.58684	1.01898	0.868602
						2008	12	23	357	8.8	2.9	5.85	41	20.4266	9.64134	7.93855	1.10113	1.15156
						2008	12	24	358	7.6	2.7	5.15	46	21.634	8.48051	7.66221	1.03135	0.885368
						2008	12	25	359	6.6	3.3	4.95	51	27.8313	7.34746	8.08928	1.07934	0.725904
						2008	12	26	360	7.7	0.8	4.25	46.5	12.7318	7.02795	5.35099	0.692007	0.655249
						2008	12	27	361	5.3	0.8	3.05	45.5	23.0931	8.31352	7.83806	0.95848	0.579993
						2008	12	28	362	4.6	-0.6	2	44.5	21.9646	9.13727	8.01392	0.930632	0.441637
						2008	12	29	363	5	-1.6	1.7	78	21.391	11.2944	8.7927	1.0056	0.422371
						2008	12	30	364	5.2	1	3.1	79.5	23.1375	7.7742	7.58684	0.929984	0.523729
						2008	12	31	365	1.3	-1.3	0	80	34.0813	7.0889	8.7927	0.917932	0
										-1	-5.6					7.58684
																	1170.54	1648.85
																	ETo-HS	ETo-TURC (Ousman Couly (2016)

## Sheet: 2009
	MARDİN					year	month	day	DOY	Tmax	Tmin	Tmean	Rhmean	Ra	Rs=0.16(Tmax-Tmin)^0.5*Ra	Rs=from meteorological station	ETo-HS	ETo-TURC (Ousman Couly (2016)
	DOY	246					#	#		°C	°C	°C	%	MJ m-2 day-1*(0.408 mm day-1)
	φ (-)	37.31	0.651182			2009	1	1	1	-2.5	-7.4	-4.95	55.5	33.9157	13.2949	12.0121	0.905294	-2.34907
	tan(φ)		0.762072			2009	1	2	2	-2.2	-6.7	-4.45	51.5	34.5546	12.4396	11.7282	0.918292	-1.89987
	sin(φ)		0.606127			2009	1	3	3	1.5	-4	-1.25	60	12.2497	5.38986	4.59649	0.446162	-0.210796
	cos(φ)		0.795368			2009	1	4	4	3	-2.4	0.3	57.5	29.6565	12.8116	11.0265	1.17053	0.0905783
	dr	0.984766		(1+0.033*cos(2*3.14/365*DOY))		2009	1	5	5	5.7	2.3	4	73	20.7473	5.64326	6.12098	0.78261	0.504697
	δ	0.120494		(0.409*sin(2*3.14/365*DOY-1.39))		2009	1	6	6	6.3	2.8	4.55	82.5	38.7448	10.8485	11.5976	1.52024	0.933494
	tan(δ)	0.121081				2009	1	7	7	8.3	2.7	5.5	83	28.2971	12.6771	10.7141	1.46413	1.22819
	sin(δ)	0.120203				2009	1	8	8	9.9	3	6.45	83	25.1258	13.8695	10.56	1.50191	1.48769
	cos(δ)	0.992749				2009	1	9	9	8.5	0.7	4.6	84	17.4946	10.9166	7.81755	1.02704	0.946297
	X	0.991486				2009	1	10	10	3	-3.7	-0.35	95	31.654	16.9665	13.1095	1.34168	-0.141136		-
	ωs (eq. 25)	1.49187		(acos{(-1*tan(-0.35)*tan(0.409*sin(2*3.14/365*DOY-1.39))))		2009	1	11	11	1.3	-3.1	-0.9	77	31.4644	11.0755	10.56	1.04669	-0.260508
	sin ωs	0.996887				2009	1	12	12	3.6	-4.3	-0.35	65.5	28.4312	17.9685	12.7858	1.30856	-0.148556
	sin φ*sin δ	-0.0728584		(sin(0.35)*sin(0.409*sin(2*3.14/365*DOY-1.39)))		2009	1	13	13	6.5	-1.5	2.5	69.5	17.9332	11.4773	8.11566	0.966247	0.600837
	cos φ*cos δ	0.789601		(cos(0.35)*cos(0.409*sin(2*3.14/365*DOY-1.39))		2009	1	14	14	12.6	2	7.3	73.5	19.6971	16.7031	10.2607	1.51049	1.90713
	Gsc	0.082				2009	1	15	15	10.6	2	6.3	66	3.3463	2.30226	1.57012	0.221932	0.402726
						2009	1	16	16	13	3.9	8.45	57	24.3469	17.7245	11.7512	1.80918	2.21339
	Ra	25.1244				2009	1	17	17	9.5	4.6	7.05	52.5	32.1046	12.585	11.3706	1.65722	1.45452
						2009	1	18	18	12	3.8	7.9	55	27.0802	17.7646	12.4073	1.87016	2.12332
						2009	1	19	19	11.6	3.7	7.65	49.5	27.9946	17.6926	12.5895	1.87916	2.08607
						2009	1	20	20	10.6	3.5	7.05	65	27.1343	15.4123	11.5683	1.68602	1.73475
						2009	1	21	21	9.8	2.8	6.3	73	25.378	14.2117	10.743	1.51849	1.4947
						2009	1	22	22	8.8	1.7	5.25	66.5	32.6056	18.52	13.9008	1.87923	1.65643
						2009	1	23	23	11.5	2	6.75	65.5	29.2923	22.2621	14.4456	2.07996	2.34284
						2009	1	24	24	5.9	0.1	3	69	37.0541	17.1931	14.2781	1.74181	0.996293
						2009	1	25	25	6.5	0	3.25	74	5.37024	2.79253	2.19064	0.270452	0.269542
						2009	1	26	26	9.8	2.8	6.3	69	17.1221	9.58836	7.24812	1.0245	1.07079
						2009	1	27	27	8	3.9	5.95	76.5	2.02646	0.664677	0.656522	0.0914494	0.24253
						2009	1	28	28	10	2.1	6.05	77	10.0953	6.38022	4.53996	0.635051	0.754675
						2009	1	29	29	11	5.5	8.25	75	38.4518	16.9188	14.4284	2.20442	2.09097
						2009	1	30	30	10.5	3.4	6.95	70.5	12.0867	6.86522	5.15294	0.747994	0.878999
						2009	1	31	31	9.8	5	7.4	76.5	13.2164	5.0751	4.63292	0.684736	0.733783
						2009	2	1	32	7.6	3.4	5.5	90.5	27.8148	9.34577	9.12054	1.24636	0.951122
						2009	2	2	33	9.2	0.8	5	81	26.9662	18.1213	12.5049	1.67218	1.56638
						2009	2	3	34	7	-0.3	3.35	55.5	37.756	22.0495	16.3218	2.02463	1.36615
						2009	2	4	35	11.3	1.6	6.45	54.5	25.2346	19.582	12.5748	1.78847	2.0202
						2009	2	5	36	11	4.6	7.8	62	6.21991	3.18459	2.51764	0.378009	0.559385
						2009	2	6	37	13.8	3.6	8.7	65.5	22.0224	17.9702	11.2534	1.74903	2.2828
						2009	2	7	38	13	7	10	83	41.0454	19.7018	16.0865	2.62285	2.70218
						2009	2	8	39	14	5.4	9.7	68.5	29.758	20.4735	13.9628	2.25203	2.7469
						2009	2	9	40	10.2	7	8.6	58	15.331	3.92473	4.38798	0.679417	0.67946
						2009	2	10	41	10.6	4.8	7.7	58.5	35.7502	16.5881	13.7756	2.06025	1.96408
						2009	2	11	42	11	2	6.5	69.5	34.828	25.0762	16.7174	2.38256	2.54604
						2009	2	12	43	10	4.9	7.45	82.5	26.9866	11.0105	9.7511	1.44405	1.34769
						2009	2	13	44	14.2	6.3	10.25	69	17.9216	11.3265	8.05956	1.3259	1.68835
						2009	2	14	45	15.2	6.8	11	53.5	30.9526	20.8001	14.3535	2.42447	3.00213
						2009	2	15	46	13.5	6	9.75	45.5	25.2054	15.1233	11.0445	1.78457	2.23724
						2009	2	16	47	12.1	4.5	8.3	65	40.3351	24.5238	17.7914	2.72345	2.93894
						2009	2	17	48	7	1.8	4.4	86.5	52.5337	21.854	19.1672	2.49563	1.68349
						2009	2	18	49	8	-0.2	3.9	75	41.2303	27.0471	18.8905	2.4042	1.86385
						2009	2	19	50	8.5	1.6	5.05	76	44.095	24.3404	18.5325	2.48364	2.06368
						2009	2	20	51	10	0.5	5.25	68	36.942	28.0759	18.2181	2.46287	2.42445
						2009	2	21	52	5	0.1	2.55	79	50.374	19.7466	17.8412	2.1294	0.983581
						2009	2	22	53	3.2	-0.3	1.45	65.5	58.5403	16.3913	17.523	1.97837	0.505005
						2009	2	23	54	6.4	1.2	3.8	66.5	48.7043	20.261	17.77	2.25118	1.4005
						2009	2	24	55	8.4	1	4.7	69	42.4436	25.1266	18.4735	2.4378	2.01293
						2009	2	25	56	8.4	3.8	6.1	53	53.2938	19.6121	18.2884	2.56355	1.94496
						2009	2	26	57	11	4	7.5	53.5	39.3775	22.0514	16.6693	2.47346	2.49461
						2009	2	27	58	10	3	6.5	54	38.788	21.7213	16.4197	2.34013	2.23161
						2009	2	28	59	6	1.8	3.9	55.5	48.7624	16.3842	15.9893	2.03497	1.18176
						2009	3	1	60	7.5	1.2	4.35	81	27.2564	13.7372	10.9461	1.422	1.103
						2009	3	2	61	6.5	-1.3	2.6	79	6.54863	4.08635	2.92629	0.350119	0.282849
						2009	3	3	62	3.2	1.2	2.2	63.5	7.59408	1.21505	1.71834	0.201562	0.131049
						2009	3	4	63	5.5	1.8	3.65	49.5	17.8913	5.29581	5.50632	0.692719	0.4513
						2009	3	5	64	8.8	1.4	5.1	77	45.5932	26.9911	19.8443	2.66526	2.28743
						2009	3	6	65	8	4.7	6.35	45	69.2886	18.2922	20.1391	2.85249	2.0135
						2009	3	7	66	16	6.8	11.4	32.5	38.7145	28.4939	18.7883	3.21765	5.11759
						2009	3	8	67	18.4	7.8	13.1	43.5	35.4461	30.0583	18.4647	3.34632	5.07748
						2009	3	9	68	18	6.2	12.1	45	33.1117	31.2575	18.1988	3.1914	4.94543
						2009	3	10	69	12	5.2	8.6	44.5	44.1732	24.0302	18.4303	2.85368	3.18254
						2009	3	11	70	12.7	5.3	9	44	20.5681	12.1763	8.95222	1.40713	1.80062
						2009	3	12	71	16.7	7.8	12.25	62	36.2178	25.7871	17.2877	3.04684	3.88489
						2009	3	13	72	16.1	9.8	12.95	63.5	34.9882	17.6341	14.0512	2.53411	2.833
						2009	3	14	73	14.1	6.3	10.2	50	37.5631	23.4393	16.7853	2.75648	3.20333
						2009	3	15	74	7.7	2.2	4.95	46	41.8529	18.4153	15.7046	2.09545	1.66734
						2009	3	16	75	7.8	-0.2	3.8	42.5	19.8827	12.7249	8.99786	1.13989	1.02776
						2009	3	17	76	9.3	0.4	4.85	66	19.6699	14.0049	9.38893	1.24725	1.21908
						2009	3	18	77	9.7	3.6	6.65	77	5.01799	2.44878	1.98296	0.284355	0.43218
						2009	3	19	78	13.7	5.4	9.55	64	29.8368	19.8117	13.7535	2.20616	2.64114
						2009	3	20	79	9.5	6	7.75	48.5	66.4196	18.5975	19.8816	2.97927	2.2315
						2009	3	21	80	12.5	4	8.25	49.5	40.2484	27.3689	18.7749	2.86849	3.26363
						2009	3	22	81	16.5	5.5	11	47	8.56321	7.53562	4.54415	0.767562	1.31654
						2009	3	23	82	10.2	5.8	8	61	49.0959	17.2818	16.4775	2.49333	2.08878
						2009	3	24	83	9.3	1.6	5.45	69	52.7074	32.4678	23.4011	3.19101	2.85503
						2009	3	25	84	10.4	0.5	5.45	54	49.5426	39.2377	24.9411	3.401	3.41434
						2009	3	26	85	12.1	2.8	7.45	48.5	46.7102	34.7524	22.7915	3.37522	3.87131
						2009	3	27	86	12.7	6.1	9.4	46	46.176	24.3809	18.9805	3.02792	3.34197
						2009	3	28	87	10.3	4.2	7.25	66	59.4085	28.9913	23.4765	3.44913	3.13957
						2009	3	29	88	11.3	3.8	7.55	66	35.9219	21.5531	15.7402	2.34022	2.45396
						2009	3	30	89	15.7	5.4	10.55	61.5	45.0119	37.0898	23.1135	3.84314	5.01517
						2009	3	31	90	18.5	8.3	13.4	52	27.5843	22.5088	14.0955	2.57931	3.598
						2009	4	1	91	18.5	8.2	13.35	45.5	9.65093	7.95237	4.95573	0.905386	1.56021
						2009	4	2	92	19	11	15	37.5	33.1233	21.1989	14.9899	2.88363	4.25438
						2009	4	3	93	19	10.2	14.6	43	25.1562	17.71	11.9401	2.26892	3.33028
						2009	4	4	94	13	8.8	10.9	42.5	81.2571	27.3024	26.6444	4.48493	4.24548
						2009	4	5	95	17	5.6	11.3	59.5	49.4777	45.1237	26.729	4.56187	6.28858
						2009	4	6	96	19	11.8	15.4	55	55.8127	32.1481	23.9618	4.66579	5.37673
						2009	4	7	97	17	9.8	13.4	45.5	41.9641	24.1713	18.0162	3.29676	4.08811
						2009	4	8	98	14.8	7.3	11.05	34.5	41.0733	24.644	17.9974	3.04525	4.29386
						2009	4	9	99	16.8	7.9	12.35	41	21.7935	15.517	10.4026	1.83949	2.78154
						2009	4	10	100	16	5.4	10.7	65	52.6355	44.6349	27.419	4.58315	6.0306
						2009	4	11	101	17	5.8	11.4	66	37.4816	33.5835	20.07	3.43714	4.77538
						2009	4	12	102	17.5	8	12.75	63.5	30.0122	22.8093	14.8006	2.65191	3.54647
						2009	4	13	103	15.6	7.1	11.35	56.5	7.6052	5.17154	3.54765	0.606522	0.969629
						2009	4	14	104	18.3	6.2	12.25	47.5	15.7765	15.2716	8.78056	1.54751	2.50589
						2009	4	15	105	14	6.4	10.2	43.5	41.1448	25.0161	18.1486	2.98036	3.71699
						2009	4	16	106	14.2	5.2	9.7	58	43.7018	31.4653	20.9769	3.38331	4.08505
						2009	4	17	107	11.4	6.2	8.8	67.5	60.6012	25.2101	22.1107	3.44947	3.12919
						2009	4	18	108	9.2	3.9	6.55	70	9.11177	3.86339	3.3563	0.479322	0.560945
						2009	4	19	109	16	1.5	8.75	64	44.1185	51.1774	26.8797	4.18559	6.0837
						2009	4	20	110	18.6	10.5	14.55	67	55.814	36.1675	25.4159	4.82223	5.83961
						2009	4	21	111	18.6	11.5	15.05	63.5	58.8855	33.4469	25.1048	4.83683	5.51739
						2009	4	22	112	21	10.2	15.6	79	49.8756	43.0925	26.2253	5.1373	7.14061
						2009	4	23	113	20.8	12.7	16.75	66.5	24.3909	15.8053	11.1069	2.25065	2.92666
						2009	4	24	114	19	8.9	13.95	42.5	55.8502	45.127	28.3992	5.28831	7.80889
						2009	4	25	115	16	7	11.5	31.5	62.9515	45.3251	30.2167	5.19258	8.06447
						2009	4	26	116	17.3	9.7	13.5	38.5	65.472	39.8069	28.879	5.30145	7.16296
						2009	4	27	117	19.5	11.1	15.3	41	60.0659	40.3643	27.854	5.40734	7.5
						2009	4	28	118	20.3	12	16.15	38.5	52.2517	34.6951	24.0857	4.79587	6.88348
						2009	4	29	119	21.4	14.5	17.95	36.5	64.9779	35.8678	27.3093	5.72604	7.64646
						2009	4	30	120	22.2	14	18.1	31	31.1002	20.4017	14.2492	3.00022	4.84761
						2009	5	1	121	21	11.9	16.45	28.5	44.5792	32.4537	21.5166	4.32217	7.32147
						2009	5	2	122	20.7	13.7	17.2	24	9.52094	5.33173	4.03041	0.827342	1.68544
						2009	5	3	123	20	14	17	23	71.5453	34.3417	28.0399	5.723	8.31408
						2009	5	4	124	19	14.7	16.85	30.5	68.3041	23.4966	22.6621	4.60545	5.36525
						2009	5	5	125	19.2	10.7	14.95	36.5	47.3007	32.1645	22.0647	4.23815	6.32284
						2009	5	6	126	17	8.7	12.85	40.5	54.9376	36.4786	25.3238	4.55227	6.26531
						2009	5	7	127	18.7	10.2	14.45	50.5	32.9717	22.4208	15.3805	2.90917	3.72822
						2009	5	8	128	20	12.8	16.4	51	65.4072	37.6746	28.081	5.63256	6.43831
						2009	5	9	129	21	13	17	62.5	61.6529	39.4578	27.9009	5.69463	6.84241
						2009	5	10	130	21.7	10	15.85	59	34.529	32.3192	18.8972	3.7295	5.48037
						2009	5	11	131	19.7	11	15.35	67.5	61.092	42.52	28.8313	5.60551	6.99429
						2009	5	12	132	24	13	18.5	68	59.054	51.9675	31.3376	6.67176	9.25433
						2009	5	13	133	24.8	15	19.9	76	59.2549	46.4558	29.6795	6.56246	8.58107
						2009	5	14	134	26.2	17.2	21.7	71.5	53.5273	38.5397	25.6931	5.95226	7.44729
						2009	5	15	135	27.5	17	22.25	66	54.2552	45.5744	28.1291	6.60734	8.8259
						2009	5	16	136	29.2	19	24.1	65	60.5486	49.4076	30.9403	7.60337	9.83987
						2009	5	17	137	30.3	20	25.15	59.5	60.6404	49.9677	31.1387	7.8439	10.1088
						2009	5	18	138	32	21.5	26.75	54.5	54.0388	45.3926	28.0169	7.32041	9.43112
						2009	5	19	139	32.5	24.1	28.3	56	31.0898	20.8924	14.4171	3.89804	4.65645
						2009	5	20	140	35.3	25.6	30.45	49	47.0746	36.5299	23.4581	6.63832	8.13554
						2009	5	21	141	30.3	22.6	26.45	68.5	44.103	27.1674	19.5809	5.08176	5.78761
						2009	5	22	142	26.6	18.6	22.6	57.5	63.4385	40.6007	28.709	6.80248	7.95454
						2009	5	23	143	28	18	23	47.5	21.6333	17.3066	10.9457	2.61921	3.76939
						2009	5	24	144	24	16.7	20.35	41.5	56.3637	32.9164	24.3658	5.45185	7.00577
						2009	5	25	145	26.1	14.7	20.4	40.5	55.5696	50.6795	30.02	6.72576	10.7063
						2009	5	26	146	24	14.4	19.2	46	36.8741	28.3193	18.28	3.96686	5.5947
						2009	5	27	147	24.5	13.8	19.15	53.5	58.4905	50.0679	30.6124	6.63407	9.06692
						2009	5	28	148	26	13.5	19.75	55	52.263	52.263	29.5644	6.51099	9.57629
						2009	5	29	149	26.2	14.6	20.4	48.5	53.4473	49.5991	29.1256	6.52539	9.43183
						2009	5	30	150	27.8	15.7	21.75	34.5	54.6748	52.9252	30.4299	7.05853	12.3286
						2009	5	31	151	29.8	19.3	24.55	34.5	61.4403	51.6098	31.8543	7.91205	12.6214
						2009	6	1	152	31.4	17.2	24.3	34.5	36.5869	41.5627	22.0592	5.44678	10.2201
						2009	6	2	153	31	20.4	25.7	36	60.9537	51.6887	31.7521	8.10084	12.6326
						2009	6	3	154	32	22.2	27.1	29.5	61.8037	48.4541	30.9562	8.15195	13.0398
						2009	6	4	155	33.4	23.2	28.3	29	48.0039	39.1712	24.53	6.63232	10.8679
						2009	6	5	156	28.2	20.2	24.2	29	63.6578	40.741	28.8082	7.09633	10.656
						2009	6	6	157	29.6	18.9	24.25	27.5	55.8881	47.8402	29.2504	7.21382	12.6369
						2009	6	7	158	29.9	19	24.45	43	58.175	50.7286	30.7305	7.6149	11.1628
						2009	6	8	159	29.5	17.5	23.5	38.5	56.407	54.1507	31.2639	7.57289	12.3902
						2009	6	9	160	32.5	20.3	26.4	29	54.8556	53.5391	30.6564	7.94714	14.2959
						2009	6	10	161	32.5	22.2	27.35	40.5	58.9566	48.5803	30.2741	8.01673	11.5209
						2009	6	11	162	31.8	22.2	27	37.5	63.0446	48.4183	31.2539	8.21201	11.863
						2009	6	12	163	35	26.8	30.9	34.5	67.8718	44.5239	31.0968	8.88205	11.882
						2009	6	13	164	34	26.1	30.05	28	68.0462	43.0052	30.6011	8.5879	12.2555
						2009	6	14	165	32	20.6	26.3	26	53.4266	48.7251	28.8622	7.46512	13.4707
						2009	6	15	166	32	19	25.5	22.5	54.1447	56.3105	31.2354	7.93238	15.8771
						2009	6	16	167	34.6	20.8	27.7	20.5	50.8027	56.0862	30.1958	8.05798	16.6297
						2009	6	17	168	30.4	17.7	24.05	22.5	54.1519	55.0183	30.877	7.57878	15.1866
						2009	6	18	169	29.9	16.2	23.05	28	50.1981	55.0171	29.7281	7.12242	14.0948
						2009	6	19	170	30	17	23.5	52	52.3556	54.4499	30.2033	7.31599	10.6985
						2009	6	20	171	30.5	18.6	24.55	32.5	56.6579	53.9383	31.2719	7.76739	13.4767
						2009	6	21	172	32	20	26	33	53.3218	51.1889	29.5539	7.59202	13.0175
						2009	6	22	173	34.4	22.9	28.65	28	56.4734	51.9556	30.6417	8.3477	14.4528
						2009	6	23	174	34.7	22.3	28.5	23.5	55.5885	55.1438	31.3196	8.50482	16.0251
						2009	6	24	175	35	20	27.5	23.5	50.3465	60.4158	31.1986	8.28898	17.2844
						2009	6	25	176	35.5	20.8	28.15	22.5	48.2845	56.7826	29.6201	7.98252	16.5836
						2009	6	26	177	34	22	28	23.5	54.1943	52.0265	30.0375	8.06859	15.0595
						2009	6	27	178	36.5	19.8	28.15	23	46.544	62.1828	30.4328	8.20154	18.0119
						2009	6	28	179	31	21.4	26.2	24.5	61.1088	46.9316	30.2942	7.81772	13.1843
						2009	6	29	180	38.6	21.8	30.2	23	45.3116	60.8988	29.7156	8.36552	18.0787
						2009	6	30	181	34	23.3	28.65	20	57.0321	48.8195	29.8491	8.13177	14.798
						2009	7	1	182	36.5	25.1	30.8	20	54.3613	49.5775	29.3672	8.3708	15.3875
						2009	7	2	183	36.8	24.7	30.75	27.5	51.4234	49.7778	28.6202	8.14949	14.281
						2009	7	3	184	36.1	23.7	29.9	25	46.2688	45.8986	26.0687	7.29299	13.4447
						2009	7	4	185	34.8	23	28.9	24	51.0575	48.1983	28.0621	7.68609	14.0746
						2009	7	5	186	31.7	18.5	25.1	22	52.386	55.3197	30.4525	7.6621	15.5957
						2009	7	6	187	34	20.2	27.1	20.5	50.7379	56.0147	30.1573	7.94157	16.4811
						2009	7	7	188	35	23	29	17	43.9077	42.1514	24.3361	6.67982	13.3007
						2009	7	8	189	35.6	24.8	30.2	18.5	59.5171	51.4228	31.2949	8.81014	16.0715
						2009	7	9	190	35.8	22.4	29.1	21.5	53.7344	57.6032	31.472	8.65696	17.1822
						2009	7	10	191	36	23.3	29.65	25.5	53.2847	54.1372	30.3825	8.45529	15.6259
						2009	7	11	192	37.3	25.8	31.55	21.5	53.6591	49.3664	29.1147	8.4269	15.2131
						2009	7	12	193	36.4	28	32.2	23.5	64.7222	43.4933	30.0133	8.80139	13.2896
						2009	7	13	194	34.5	24	29.25	25	56.875	47.775	29.4874	8.13699	13.8674
						2009	7	14	195	30.6	23	26.8	25	61.5763	37.4384	27.1607	7.10466	10.6624
						2009	7	15	196	29	17.4	23.2	21.5	51.8169	48.0861	28.2371	6.79004	13.293
						2009	7	16	197	31.8	20	25.9	17.5	53.2042	50.2248	29.242	7.49474	15.0379
						2009	7	17	198	32	23.6	27.8	20.5	63.6153	42.7495	29.4999	7.88958	12.8336
						2009	7	18	199	33.5	24.3	28.9	22.5	58.3259	42.9279	28.3058	7.75283	12.7964
						2009	7	19	200	35	24.6	29.8	27.5	55.8998	46.5086	28.8434	8.05233	13.2424
						2009	7	20	201	37	25.4	31.2	26	54.3417	50.4291	29.613	8.51033	14.7646
						2009	7	21	202	37.4	24.1	30.75	25.5	49.777	52.9627	29.0452	8.2705	15.4856
						2009	7	22	203	38.2	24.7	31.45	23.5	46.474	50.1919	27.321	7.89171	15.1279
						2009	7	23	204	38.4	23.7	31.05	21.5	47.7958	56.2079	29.3203	8.40042	17.1469
						2009	7	24	205	35	25	30	18.5	58.5253	46.8202	29.6117	8.30156	14.6568
						2009	7	25	206	35	22.8	28.9	19	52.1487	50.8971	29.1436	7.9823	15.6023
						2009	7	26	207	35.1	22.3	28.7	24	51.0727	52.2985	29.2357	7.97324	15.186
						2009	7	27	208	37	24.1	30.55	25	49.3195	50.8978	28.3422	8.03708	14.9515
						2009	7	28	209	35.1	24.7	29.9	18	53.5133	44.523	27.612	7.72475	14.0215
						2009	7	29	210	31.5	16.9	24.2	23	46.4724	54.2797	28.4113	6.99856	14.9489
						2009	7	30	211	35.1	18.6	26.85	19.5	43.4469	57.3499	28.2371	7.39452	16.9729
						2009	7	31	212	35	23.8	29.4	19	53.2306	47.6946	28.503	7.89043	14.745
						2009	8	1	213	35.2	24	29.6	20.5	51.8755	46.4805	27.7774	7.72214	14.2042
						2009	8	2	214	32.8	20.4	26.6	16	49.5215	49.1254	27.9013	7.26567	15.0829
						2009	8	3	215	33.1	24.5	28.8	17.5	60.1701	41.397	28.2325	7.7162	12.9797
						2009	8	4	216	34.5	21.1	27.8	20.5	49.9956	53.5952	29.2822	7.83135	15.9378
						2009	8	5	217	36.5	25.2	30.85	19	53.6664	48.5144	28.8643	8.23593	15.2296
						2009	8	6	218	36.9	28.2	32.55	20	60.651	42.2131	28.6232	8.4525	13.4307
						2009	8	7	219	32	26.3	29.15	22	74.4277	33.939	28.431	7.82881	10.324
						2009	8	8	220	31	22.5	26.75	20.5	58.8463	40.0155	27.4504	7.1724	11.8876
						2009	8	9	221	32	21.8	26.9	24.5	54.3819	44.3757	27.7891	7.28535	12.6165
						2009	8	10	222	32.8	20.7	26.75	23.5	48.53	46.9771	27.0099	7.05731	13.4353
						2009	8	11	223	31.2	19	25.1	25	48.1592	47.0033	26.914	6.7718	12.9282
						2009	8	12	224	31.7	19.1	25.4	21.5	47.8213	48.2039	27.1598	6.88143	13.7933
						2009	8	13	225	32.9	21.7	27.3	22	49.7776	44.6007	26.654	7.0503	13.078
						2009	8	14	226	34	24.2	29.1	20.5	52.2373	40.954	26.1646	7.19705	12.5157
						2009	8	15	227	35	23.3	29.15	19.5	43.604	40.8134	23.8638	6.57118	12.6075
						2009	8	16	228	37.4	24	30.7	18	40.8423	43.7829	23.9212	6.80444	13.9201
						2009	8	17	229	38.2	27	32.6	19	45.6568	40.9084	24.4475	7.22658	13.1719
						2009	8	18	230	36.3	26.5	31.4	22.5	52.2214	40.9416	26.1566	7.5477	12.5738
						2009	8	19	231	39	28	33.5	19.5	51.4076	45.2387	27.28	8.20785	14.5498
						2009	8	20	232	37	26.4	31.7	25	45.8573	38.887	23.8881	6.93513	11.7023
						2009	8	21	233	34.7	22.7	28.7	24	45.3211	43.5082	25.1195	6.85065	12.7316
						2009	8	22	234	33.7	21.3	27.5	23	44.897	44.5378	25.2958	6.72069	12.9606
						2009	8	23	235	36.2	21	28.6	23	39.317	47.8095	24.5258	6.67435	14.0608
						2009	8	24	236	34.4	20.1	27.25	24.5	41.3437	47.2972	25.0148	6.60937	13.4717
						2009	8	25	237	33.3	23.9	28.6	29	40.5179	30.4695	19.8761	5.409	8.60721
						2009	8	26	238	34.2	21.9	28.05	23.5	40.7163	40.0649	22.8476	6.14396	11.7381
						2009	8	27	239	32.6	20.2	26.4	22.5	36.2683	35.9782	20.4342	5.29723	10.4818
						2009	8	28	240	33.5	23.3	28.4	23.5	48.0809	39.2341	24.5693	6.65738	11.5564
						2009	8	29	241	33.2	24.2	28.7	22	50.6566	36.4727	24.3152	6.63129	10.9915
						2009	8	30	242	32	24	28	21	55.3967	35.4539	25.0697	6.73414	10.7183
						2009	8	31	243	33.6	23	28.3	18.5	45.9505	38.9661	23.9367	6.47191	12.0616
						2009	9	1	244	32	23	27.5	21.5	50.1515	36.1091	24.0727	6.39575	10.7819
						2009	9	2	245	32.6	22.9	27.75	22.5	49.6222	38.5068	24.7276	6.60599	11.3786
						2009	9	3	246	33.2	22.8	28	20.5	44.6822	37.1755	23.0553	6.19304	11.2665
						2009	9	4	247	35	25	30	23	48.6587	38.9269	24.6196	6.90202	11.7465
						2009	9	5	248	34.6	24.6	29.6	25.5	45.2625	36.21	22.9012	6.36656	10.6378
						2009	9	6	249	34.6	24	29.3	20.5	39.8741	33.8132	20.7713	5.73789	10.4637
						2009	9	7	250	32.8	23.6	28.2	19	49.4861	36.4218	24.0158	6.47922	11.2446
						2009	9	8	251	30.4	22	26.2	17.5	53.1479	35.7154	24.6459	6.36013	10.913
						2009	9	9	252	32	22.7	27.35	20	49.6681	36.9531	24.2348	6.41748	11.1664
						2009	9	10	253	27.8	19	23.4	25.5	47.2726	33.2799	22.4373	5.4217	9.02015
						2009	9	11	254	30	20	25	21.5	42.6922	34.1538	21.6007	5.42226	9.88128
						2009	9	12	255	30.2	21.5	25.85	19.5	27.5184	19.1528	12.9868	3.32472	5.98288
						2009	9	13	256	28.3	23.9	26.1	17.5	62.5382	22.0135	20.989	5.40411	6.94809
						2009	9	14	257	28.6	18.2	23.4	17.5	42.9683	35.7497	22.171	5.35736	10.4669
						2009	9	15	258	30.6	22.1	26.35	17	46.0288	31.2996	21.4714	5.55979	9.70549
						2009	9	16	259	29.7	20.7	25.2	20.5	42.0558	30.2802	20.1868	5.09101	8.94142
						2009	9	17	260	27.2	18.3	22.75	24	43.6545	31.082	20.8374	4.95568	8.49907
						2009	9	18	261	23.2	19.2	21.2	35.5	61.5031	19.681	19.681	4.50173	4.77118
						2009	9	19	262	24.2	16.5	20.35	38.5	46.8708	28.8724	20.8098	4.65619	6.43326
						2009	9	20	263	23	14.8	18.9	36.5	35.8769	23.5353	16.4377	3.53815	5.283
						2009	9	21	264	20	14.1	17.05	32	48.4517	22.8692	18.8302	3.8488	5.17456
						2009	9	22	265	23.6	13.5	18.55	52.5	39.6667	32.0507	20.17	4.30011	5.85174
						2009	9	23	266	22.6	18.1	20.35	52.5	65.56	23.6016	22.2518	4.97884	4.58488
						2009	9	24	267	26.2	14.9	20.55	42.5	37.6851	34.0673	20.2688	4.55893	7.17355
						2009	9	25	268	27	18.1	22.55	31.5	35.7494	25.4536	17.0641	4.03827	6.48282
						2009	9	26	269	27.6	19.7	23.65	31	41.6474	26.3211	18.7293	4.55317	6.85211
						2009	9	27	270	26.1	15.8	20.95	36.5	39.0807	32.2025	20.0679	4.5608	7.38984
						2009	9	28	271	18.5	9.6	14.05	44.5	41.5651	29.5944	19.8401	3.70614	5.12372
						2009	9	29	272	20.7	8.3	14.5	42	34.843	34.5642	19.6312	3.71892	6.22341
						2009	9	30	273	23.3	14.8	19.05	46.5	33.1548	22.5453	15.4659	3.34258	4.48628
						2009	10	1	274	25.8	16.1	20.95	43.5	39.321	30.5131	19.5943	4.45318	6.43678
						2009	10	2	275	27	18.2	22.6	34.5	36.476	25.6791	17.3128	4.1022	6.31992
						2009	10	3	276	28	19.1	23.55	30	40.6546	28.9461	19.4055	4.70618	7.55683
						2009	10	4	277	29.5	20.1	24.8	22.5	25.2995	19.0252	12.4107	3.1008	5.6811
						2009	10	5	278	29.4	21.6	25.5	26.5	43.1494	26.9252	19.2816	4.89664	7.56461
						2009	10	6	279	25.6	18.6	22.1	27	43.594	24.4126	18.4542	4.31853	6.5021
						2009	10	7	280	26	15.7	20.85	22	34.0767	28.0792	17.4983	3.96656	7.61501
						2009	10	8	281	26	16.9	21.45	26	31.0152	22.5791	14.9698	3.44606	6.0433
						2009	10	9	282	27	19.3	23.15	28	28.6623	17.656	12.7255	3.05632	4.88188
						2009	10	10	283	26	17	21.5	22	21.2953	15.3326	10.2217	2.35605	4.45398
						2009	10	11	284	27	16.7	21.85	21	29.5839	24.3771	15.1913	3.53269	6.8805
						2009	10	12	285	28.2	18.9	23.55	18	36.1323	26.8824	17.6302	4.27564	7.99494
						2009	10	13	286	26.5	20.4	23.45	50.5	7.16992	3.49892	2.83334	0.685474	1.05666
						2009	10	14	287	24.2	18.5	21.35	56	5.79612	2.64303	2.21409	0.508387	0.861776
						2009	10	15	288	24.8	0	12.4	39	19.5269	38.7413	15.5589	2.75584	6.62847
						2009	10	16	289	29.5	20.8	25.15	40	37.3424	25.9903	17.6231	4.43929	6.23172
						2009	10	17	290	30.5	21.4	25.95	33.5	2.15657	1.56998	1.04089	0.267085	0.888469
						2009	10	18	291	25.1	23.4	24.25	31.5	55.3224	7.52384	11.541	2.84629	2.32796
						2009	10	19	292	30.4	21.7	26.05	32	33.4928	23.311	15.8063	4.06508	6.28191
						2009	10	20	293	29.4	21.8	25.6	43.5	37.4153	22.7485	16.5035	4.20081	5.30596
						2009	10	21	294	28.2	22	25.1	43	31.2535	15.5017	12.4513	3.13285	3.75485
						2009	10	22	295	26.8	20.7	23.75	41.5	31.8392	15.5375	12.5819	3.0661	3.75593
						2009	10	23	296	26.8	19.7	23.25	35.5	35.9958	20.4456	15.3462	3.69472	5.12603
						2009	10	24	297	25.8	18.8	22.3	31	29.7903	16.6826	12.6108	2.9659	4.42357
						2009	10	25	298	25.2	17.3	21.25	29.5	29.3586	18.5546	13.2029	3.02383	4.85031
						2009	10	26	299	24.1	17.2	20.65	30.5	34.5123	19.0508	14.505	3.27102	4.85365
						2009	10	27	300	19.5	13.2	16.35	29	37.1005	18.6986	14.8994	2.98421	4.3693
						2009	10	28	301	17.3	11.9	14.6	32	12.0056	5.18642	4.46376	0.848231	1.3987
						2009	10	29	302	13.3	12.3	12.8	32	89.0549	7.12439	14.2488	2.55721	1.6534
						2009	10	30	303	12.7	10.6	11.65	34.5	54.839	9.21295	12.7151	2.1962	1.8709
						2009	10	31	304	12.8	11	11.9	30	17.8276	2.56717	3.82692	0.666613	0.821152
						2009	11	1	305	12.4	10	11.2	62	23.5185	4.51556	5.82956	0.991521	0.875362
						2009	11	2	306	14.5	10.1	12.3	79.5	34.3474	12.0903	11.5276	2.03505	1.98057
						2009	11	3	307	10.2	6.6	8.4	74	49.6324	14.2941	15.0673	2.31529	1.82326
						2009	11	4	308	12.4	7.4	9.9	76	40.091	16.0364	14.3434	2.33024	2.23414
						2009	11	5	309	14.5	10.3	12.4	75	39.8279	13.3822	13.0597	2.31317	2.17062
						2009	11	6	310	16.8	11.2	14	75	9.03686	4.04851	3.42162	0.638155	0.91866
						2009	11	7	311	19.9	11.6	15.75	66.5	20.5473	13.6434	9.47141	1.8637	2.49816
						2009	11	8	312	20.2	13.2	16.7	61	14.7532	8.26179	6.24533	1.2637	1.69058
						2009	11	9	313	20.7	14.2	17.45	66.5	23.7514	12.3507	9.68872	2.00306	2.40731
						2009	11	10	314	18.3	10.8	14.55	69	25.752	15.4512	11.284	2.14094	2.67748
						2009	11	11	315	20.9	14	17.45	62	31.2477	17.2487	13.1329	2.71512	3.22381
						2009	11	12	316	18.7	13.7	16.2	54.5	37.9506	15.1802	13.5776	2.70751	2.77984
						2009	11	13	317	18.4	13.1	15.75	52.5	37.3655	15.843	13.7635	2.70826	2.84741
						2009	11	14	318	15.1	10.3	12.7	73	35.6467	13.6883	12.4957	2.23526	2.24257
						2009	11	15	319	13.2	8.6	10.9	67.5	34.1427	12.5645	11.7165	1.97218	1.91188
						2009	11	16	320	11.2	7.7	9.45	58	41.9382	11.7427	12.5535	2.00631	1.65738
						2009	11	17	321	9.1	5.6	7.35	55.5	39.9897	11.1971	11.9702	1.76566	1.35457
						2009	11	18	322	11.3	6.4	8.85	71.5	31.1564	12.2133	11.0348	1.72477	1.64533
						2009	11	19	323	10.6	4.4	7.5	67.5	7.00887	3.4764	2.79231	0.414336	0.575194
						2009	11	20	324	10.9	5.2	8.05	73.5	22.7438	10.3712	8.68802	1.31719	1.34911
						2009	11	21	325	13.4	6.1	9.75	79.5	11.1296	6.49968	4.81128	0.777411	1.04898
						2009	11	22	326	11.5	6.3	8.9	85	32.7461	13.6224	11.9476	1.87094	1.81382
						2009	11	23	327	12.7	7.1	9.9	68.5	31.3105	14.0271	11.8551	1.92598	1.98648
						2009	11	24	328	12.2	6.2	9.2	70	26.9915	12.9559	10.5785	1.67515	1.77318
						2009	11	25	329	9	6	7.5	64	36.2031	8.68874	10.0329	1.48873	1.1138
						2009	11	26	330	11.3	5.2	8.25	68.5	19.788	9.65654	7.81964	1.19471	1.29212
						2009	11	27	331	12.6	6.2	9.4	50	26.2678	13.4491	10.6325	1.69618	1.85578
						2009	11	28	332	11.5	5.8	8.65	65	12.8878	5.87684	4.92307	0.763713	0.903302
						2009	11	29	333	13.9	7.3	10.6	93.5	1.81721	0.959489	0.746961	0.124418	0.39143
						2009	11	30	334	16	7.8	11.9	79	25.2872	16.5884	11.5858	2.01814	2.56151
						2009	12	1	335	12	5.3	8.65	83	34.4049	18.441	14.2488	2.2104	2.32786
						2009	12	2	336	13.7	5.9	9.8	59	28.4546	17.7556	12.7151	2.05824	2.43109
						2009	12	3	337	11.7	6.7	9.2	46	10.6966	4.27862	3.82692	0.606012	0.793439
						2009	12	4	338	9.6	3.8	6.7	74	15.1287	7.01972	5.82956	0.837664	0.87193
						2009	12	5	339	12.8	6.5	9.65	96.5	28.7045	14.4671	11.5276	1.85589	2.00935
						2009	12	6	340	9.5	5.6	7.55	90	47.6853	14.8778	15.0673	2.24018	1.76112
						2009	12	7	341	7.1	4.9	6	89.5	60.4395	10.6374	14.3434	2.00215	1.12728
						2009	12	8	342	7.1	5.3	6.2	85	60.8382	8.76069	13.0597	1.83828	0.983728
						2009	12	9	343	8.5	4.4	6.45	83.5	10.5613	3.46412	3.42162	0.486644	0.517737
						2009	12	10	344	5.8	5.7	5.75	94.5	187.195	1.49756	9.47141	1.3082	0.308185
						2009	12	11	345	7.6	5	6.3	94	24.2074	5.03515	6.24533	0.882755	0.653306
						2009	12	12	346	7.4	3.5	5.45	79.5	30.663	9.56684	9.68872	1.32117	0.963043
						2009	12	13	347	6.6	4.7	5.65	78	51.1641	7.77694	11.284	1.55193	0.836898
						2009	12	14	348	9.6	4.3	6.95	75.5	35.6537	15.1172	13.1329	1.90636	1.68897
						2009	12	15	349	7.7	1.5	4.6	65	34.0806	16.904	13.5776	1.78377	1.38191
						2009	12	16	350	7.3	4.2	5.75	57.5	48.8572	12.1166	13.7635	1.90103	1.2204
						2009	12	17	351	7.7	5.2	6.45	62	49.3935	9.8787	12.4957	1.77721	1.11568
						2009	12	18	352	6.5	5.3	5.9	63.5	66.8477	6.41738	11.7165	1.6286	0.744498
						2009	12	19	353	8	5.8	6.9	62	52.8971	9.3099	12.5535	1.81856	1.11344
						2009	12	20	354	8.5	7.3	7.9	65.5	68.2954	6.55636	11.9702	1.80428	0.924669
						2009	12	21	355	10.9	8.3	9.6	63	42.772	8.89657	11.0348	1.77331	1.32911
						2009	12	22	356	14	9	11.5	54.5	7.80474	3.1219	2.79231	0.479843	0.701148
						2009	12	23	357	14.6	9.7	12.15	63	24.5303	9.61588	8.68802	1.52611	1.62395
						2009	12	24	358	12.6	8.9	10.75	88.5	15.6329	4.62734	4.81128	0.805629	0.869342
						2009	12	25	359	13.9	8.4	11.15	63.5	31.8405	14.0098	11.9476	2.0286	2.12807
						2009	12	26	360	10.4	7.3	8.85	62	42.0827	10.4365	11.8551	1.85297	1.44094
						2009	12	27	361	12.4	5.6	9	65.5	25.3541	13.7926	10.5785	1.66274	1.84635
						2009	12	28	362	12.6	8	10.3	63	29.2366	10.7591	10.0329	1.65349	1.62162
						2009	12	29	363	11.1	7.8	9.45	54.5	26.9036	7.10254	7.81964	1.24974	1.10141
						2009	12	30	364	9	5.1	7.05	63	33.6497	10.4987	10.6325	1.54963	1.24774
						2009	12	31	365	8.4	5.5	6.95	88.5	18.0683	4.19185	4.92307	0.714627	0.616594
																	1402.78	2208.75
																	ETo-HS	ETo-TURC (Ousman Couly (2016)

## Sheet: 2010
	MARDİN					year	month	day	DOY	Tmax	Tmin	Tmean	Rhmean	Ra	Rs=0.16(Tmax-Tmin)^0.5*Ra	Rs=from meteorological station	ETo-HS	ETo-TURC (Ousman Couly (2016)
	DOY	246					#	#		°C	°C	°C	%	MJ m-2 day-1*(0.408 mm day-1)
	φ (-)	37.31	0.651182			2010	1	1	1	10.8	4.1	7.45	75.5	28.0771	15.0493	11.6281	1.72203	1.76318
	tan(φ)		0.762072			2010	1	2	2	7.2	4.7	5.95	79	41.3102	8.26204	10.4508	1.45572	0.911425
	sin(φ)		0.606127			2010	1	3	3	7	5.1	6.05	78.5	30.6548	4.65952	6.76075	0.945695	0.601365
	cos(φ)		0.795368			2010	1	4	4	7.1	5.1	6.1	72	10.8212	1.73139	2.44856	0.343223	0.342476
	dr	0.984766		(1+0.033*cos(2*3.14/365*DOY))		2010	1	5	5	6.1	1.9	4	95	36.6497	12.3143	12.0175	1.53653	0.94007
	δ	0.120494		(0.409*sin(2*3.14/365*DOY-1.39))		2010	1	6	6	9.3	1	5.15	78.5	3.30178	2.19238	1.52197	0.20486	0.339296
	tan(δ)	0.121081				2010	1	7	7	11.1	6.6	8.85	86	37.6472	13.553	12.7779	1.99721	1.79944
	sin(δ)	0.120203				2010	1	8	8	16	6.6	11.3	67.5	24.8488	18.6863	12.1896	2.08042	2.76728
	cos(δ)	0.992749				2010	1	9	9	12.7	6.7	9.7	60.5	17.9662	8.62377	7.04128	1.13567	1.3043
	X	0.991486				2010	1	10	10	15	8.4	11.7	47.5	29.6632	15.6621	12.193	2.1096	2.49762		-
	ωs (eq. 25)	1.49187		(acos{(-1*tan(-0.35)*tan(0.409*sin(2*3.14/365*DOY-1.39))))		2010	1	11	11	12.2	8.5	10.35	58.5	48.4891	14.3528	14.9233	2.46383	2.08113
	sin ωs	0.996887				2010	1	12	12	9.5	8	8.75	67	32.4368	3.89241	6.35628	0.989774	0.683255
	sin φ*sin δ	-0.0728584		(sin(0.35)*sin(0.409*sin(2*3.14/365*DOY-1.39)))		2010	1	13	13	9.3	5.7	7.5	62.5	14.8445	4.27521	4.50647	0.66869	0.657738
	cos φ*cos δ	0.789601		(cos(0.35)*cos(0.409*sin(2*3.14/365*DOY-1.39))		2010	1	14	14	8.4	5.8	7.1	56.5	27.5588	5.73222	7.10994	1.03833	0.779037
	Gsc	0.082				2010	1	15	15	8.9	6.2	7.55	75	28.4052	6.13553	7.46793	1.11032	0.853741
						2010	1	16	16	11.1	7.3	9.2	84.5	16.7374	5.08817	5.22035	0.826669	0.845956
	Ra	25.1244				2010	1	17	17	13.6	7.9	10.75	69	17.2206	7.85261	6.5782	1.10149	1.28675
						2010	1	18	18	14.5	11.7	13.1	52.5	54.5451	12.2181	14.6034	2.64656	2.0678
						2010	1	19	19	13	5.6	9.3	48.5	37.6635	22.2968	16.3929	2.60552	2.9553
						2010	1	20	20	8.8	6.5	7.65	46	82.5159	15.1829	20.0227	2.98867	1.91185
						2010	1	21	21	7.1	4.5	5.8	46.5	66.6532	13.8639	17.196	2.38017	1.44804
						2010	1	22	22	8	3.8	5.9	54.5	7.64738	2.56952	2.50759	0.348557	0.407764
						2010	1	23	23	5.8	4.2	5	40	19.0828	2.4426	3.86209	0.516446	0.401459
						2010	1	24	24	6.8	4.9	5.85	52.5	100.483	15.2734	22.161	3.07388	1.51024
						2010	1	25	25	5.4	-1	2.2	49	51.9833	26.6154	21.0413	2.46815	1.15446
						2010	1	26	26	0.9	-3.9	-1.5	51.5	42.664	16.383	14.9555	1.42974	-0.636292
						2010	1	27	27	1	-5	-2	48	44.6639	21.4387	17.5046	1.6221	-1.1542
						2010	1	28	28	-0.1	-2.5	-1.3	71.5	81.1248	15.576	20.1085	1.94595	-0.519663
						2010	1	29	29	5.6	-0.1	2.75	70	11.6416	5.30855	4.44701	0.53598	0.355339
						2010	1	30	30	7.7	3.5	5.6	76.5	35.5746	11.953	11.665	1.60091	1.18343
						2010	1	31	31	8.5	5.6	7.05	85	59.5418	13.8137	16.2234	2.36448	1.57631
						2010	2	1	32	10.1	5.9	8	75	86.3596	29.0168	28.3175	4.28492	3.35413
						2010	2	2	33	11.8	6.3	9.05	58.5	60.7798	26.7431	22.8066	3.59147	3.36346
						2010	2	3	34	8.1	5.7	6.9	58.5	63.9661	12.2815	15.8553	2.29689	1.40368
						2010	2	4	35	6.3	-0.1	3.1	68.5	73.2963	37.5277	29.6682	3.63669	2.10346
						2010	2	5	36	3.4	-2	0.7	45.5	82.1316	35.4808	30.537	3.31335	0.552674
						2010	2	6	37	2.8	-1.3	0.75	49	91.6971	30.0767	29.7076	3.23206	0.481625
						2010	2	7	38	7.1	-0.8	3.15	52	62.0651	39.2252	27.9114	3.42952	2.22282
						2010	2	8	39	4.9	0.9	2.9	59	91.8484	29.3915	29.3915	3.56829	1.58111
						2010	2	9	40	2.6	-0.5	1.05	86	108.153	26.8218	30.4675	3.36835	0.586343
						2010	2	10	41	8.7	0.6	4.65	80.5	51.1247	33.1288	23.2806	3.06533	2.58361
						2010	2	11	42	7.5	4.5	6	80	99.4444	23.8667	27.5588	3.84685	2.29902
						2010	2	12	43	10.7	5.3	8	78	73.9514	31.947	27.4956	4.16055	3.67008
						2010	2	13	44	12.9	7.2	10.05	79	69.7079	31.7868	26.6281	4.34943	4.2133
						2010	2	14	45	14.6	8.9	11.75	73.5	34.5728	15.7652	13.2066	2.28885	2.43131
						2010	2	15	46	13.4	9.3	11.35	72.5	87.8691	28.8211	28.4674	4.86692	4.12754
						2010	2	16	47	13.4	9.4	11.4	90.5	93.921	30.0547	30.0547	5.14711	4.30301
						2010	2	17	48	15.2	9.7	12.45	91.5	67.5228	29.71	25.3368	4.49516	4.47112
						2010	2	18	49	14.4	9.8	12.1	81.5	82.6073	30.3995	28.3477	4.97115	4.49698
						2010	2	19	50	14.1	9	11.55	72	76.6875	31.2885	27.7096	4.76986	4.50138
						2010	2	20	51	16.4	7.5	11.95	86	62.6428	44.6017	29.901	5.21725	6.41816
						2010	2	21	52	12.6	9	10.8	85	57.8153	16.6508	17.5515	2.94407	2.43195
						2010	2	22	53	11.3	5	8.15	56.5	75.302	37.9522	30.241	4.60259	4.37005
						2010	2	23	54	8.6	4	6.3	55	87.8746	32.3378	30.1552	4.26233	3.15669
						2010	2	24	55	9.9	3.4	6.65	60.5	73.7752	38.3631	30.0945	4.31553	3.85192
						2010	2	25	56	9.2	5.4	7.3	75.5	87.9734	26.7439	27.4387	4.03929	2.92606
						2010	2	26	57	11.2	6	8.6	67.5	76.4389	31.7986	27.8892	4.31825	3.82826
						2010	2	27	58	8.2	4.8	6.5	55.5	90.3335	24.5707	26.6507	3.79824	2.49867
						2010	2	28	59	7.5	4.6	6.05	70	113.28	26.2809	30.8653	4.31745	2.52777
						2010	3	1	60	7.5	2.7	5.1	62	86.5643	33.2407	30.3444	4.07552	2.77899
						2010	3	2	61	10.3	4.8	7.55	35.5	78.8541	34.6958	29.5887	4.39918	4.60894
						2010	3	3	62	8.5	2.5	5.5	35.5	75.1937	36.093	29.4698	4.02718	3.83353
						2010	3	4	63	10.4	2.3	6.35	38	63.9459	41.4369	29.1189	4.1244	4.70123
						2010	3	5	64	8.5	6.2	7.35	39	122.838	22.6022	29.8068	4.39665	2.91285
						2010	3	6	65	10.7	6.9	8.8	36	84.7005	25.749	26.4179	4.12143	3.82914
						2010	3	7	66	11	7.3	9.15	40.5	88.5271	26.204	27.2456	4.30649	3.77424
						2010	3	8	67	12.7	8.3	10.5	41.5	85.3459	30.0418	28.6437	4.75426	4.59957
						2010	3	9	68	16.4	11.6	14	66	83.4934	32.0615	29.268	5.45868	5.11094
						2010	3	10	69	19	13.5	16.25	69.5	76.5644	33.6883	28.7295	5.73738	5.76747
						2010	3	11	70	17.9	12.9	15.4	58.5	78.3307	31.3323	28.0244	5.45686	5.24861
						2010	3	12	71	19.1	14.6	16.85	63	85.4125	30.7485	28.99	5.8914	5.38561
						2010	3	13	72	18	13.9	15.95	65	86.8817	28.4972	28.1475	5.57163	4.88654
						2010	3	14	73	19.8	13.1	16.45	49.5	66.2641	35.5176	27.4433	5.5127	6.14148
						2010	3	15	74	20.5	15.2	17.85	58.5	75.3176	31.9347	27.7431	5.80072	5.73137
						2010	3	16	75	20.1	7.4	13.75	65.5	45.8564	46.5901	26.147	4.83826	7.21735
						2010	3	17	76	12.4	2.6	7.5	67.5	52.1436	40.8806	26.1177	3.87546	4.4403
						2010	3	18	77	8	3.9	5.95	77	85.0375	27.8923	27.55	3.83755	2.63973
						2010	3	19	78	9.7	-0.1	4.8	70	51.4749	40.3563	25.7827	3.41747	3.18991
						2010	3	20	79	11.2	2.7	6.95	56	58.5142	39.7896	27.2955	3.96218	4.11069
						2010	3	21	80	13.2	2.7	7.95	71	51.7388	43.4606	26.8244	4.05113	4.89147
						2010	3	22	81	17.3	9.4	13.35	68.5	60.3753	38.1572	27.1514	4.96043	5.87524
						2010	3	23	82	19.1	11.4	15.25	52	60.8884	37.5073	27.0334	5.2401	6.1883
						2010	3	24	83	20.6	13.6	17.1	44	62.5003	35.0002	26.4577	5.41558	6.65009
						2010	3	25	84	18.7	13	15.85	50.5	69.0974	31.5084	26.3948	5.20921	5.35124
						2010	3	26	85	19.6	13.2	16.4	80	64.359	32.9518	26.0507	5.22532	5.67365
						2010	3	27	86	18.8	11.1	14.95	69.5	59.4201	36.6028	26.3814	5.06732	5.98737
						2010	3	28	87	15.7	8.6	12.15	63	62.861	35.705	26.7997	4.70755	5.24328
						2010	3	29	88	14	8.9	11.45	68.5	70.5344	28.778	25.4863	4.3722	4.14239
						2010	3	30	89	14.6	9.4	12	65	70.6792	29.4025	25.7877	4.5071	4.33897
						2010	3	31	90	14.3	6.3	10.3	64.5	55.1894	35.3212	24.9759	4.11619	4.7215
						2010	4	1	91	15.3	9.7	12.5	61	64.3483	28.8281	24.3642	4.32974	4.35663
						2010	4	2	92	17.8	10	13.9	44.5	53.9332	33.6543	24.1004	4.48075	5.74824
						2010	4	3	93	20.7	12.1	16.4	49	56.963	39.1905	26.7277	5.36113	6.77925
						2010	4	4	94	20.9	12.3	16.6	46	55.4085	38.121	25.9983	5.24532	6.92248
						2010	4	5	95	18.7	8.4	13.55	39	49.9963	41.197	25.673	4.72044	7.36952
						2010	4	6	96	20.4	13.3	16.85	43	47.7279	27.1094	20.348	4.13516	5.26768
						2010	4	7	97	18.9	12.1	15.5	44	59.6757	32.4636	24.8984	4.86277	5.9102
						2010	4	8	98	14.8	9.3	12.05	53	65.107	28.6471	24.4303	4.27702	4.24467
						2010	4	9	99	14.7	7.7	11.2	73.5	58.726	32.8865	24.8599	4.2283	4.63506
						2010	4	10	100	14.3	8.7	11.5	53.5	66.0602	29.595	25.0123	4.29823	4.26252
						2010	4	11	101	11.9	7.1	9.5	56.5	35.9728	13.8135	12.61	2.01904	1.91167
						2010	4	12	102	18	11.8	14.9	51.5	47.8041	23.7108	19.045	3.65255	3.98575
						2010	4	13	103	15.1	6.7	10.9	39	45.9788	30.8977	21.3215	3.58895	4.97998
						2010	4	14	104	18.7	8.7	13.7	34.5	41.6743	33.3395	21.0857	3.89554	6.40373
						2010	4	15	105	20.2	12.9	16.55	48	50.6096	29.556	21.8783	4.40767	5.29314
						2010	4	16	106	24	15.1	19.55	54.5	42.5932	30.3263	20.3308	4.45362	5.68623
						2010	4	17	107	23.5	17.6	20.55	52.5	52.6814	24.8656	20.474	4.60507	4.8304
						2010	4	18	108	23.5	15.3	19.4	51	35.2902	23.1504	16.1689	3.52771	4.41267
						2010	4	19	109	22	14.2	18.1	64.5	48.7854	30.4421	21.8	4.59007	5.51473
						2010	4	20	110	24.1	16.3	20.2	62.5	46.4223	28.9675	20.7441	4.62323	5.52506
						2010	4	21	111	20.1	12.6	16.35	62	41.4058	24.8435	18.1431	3.63388	4.35446
						2010	4	22	112	19.2	12.6	15.9	39.5	48.4546	25.584	19.9171	3.93663	5.07657
						2010	4	23	113	18.6	9.8	14.2	37.5	32.3872	22.8006	15.3722	2.88505	4.4224
						2010	4	24	114	20	10.3	15.15	35.5	31.3918	24.36	15.6431	3.02305	4.97361
						2010	4	25	115	20.8	11.5	16.15	32.5	40.5318	30.1557	19.7769	3.93791	6.47825
						2010	4	26	116	22.6	14.4	18.5	30.5	40.2616	26.4116	18.4467	3.92729	6.23854
						2010	4	27	117	23	14.4	18.7	30.5	31.374	21.5853	14.7211	3.15138	5.20708
						2010	4	28	118	17.9	11.4	14.65	36	22.2754	11.5832	9.08663	1.72936	2.5132
						2010	4	29	119	18.7	10	14.35	49.5	35.1439	24.4602	16.5855	3.12737	4.05288
						2010	4	30	120	18.7	11.6	15.15	47	36.5595	20.7658	15.5865	3.01212	3.71286
						2010	5	1	121	18.9	10	14.45	35.5	22.4242	15.966	10.7036	2.02455	3.31532
						2010	5	2	122	15.8	10.9	13.35	36.5	42.451	16.6408	15.0351	2.74683	3.26163
						2010	5	3	123	15.8	9.4	12.6	23	35.1048	17.9737	14.2094	2.53348	3.93466
						2010	5	4	124	19.5	10	14.75	21.5	12.5053	9.50404	6.16703	1.17732	2.50749
						2010	5	5	125	21.4	10.5	15.95	27	23.916	20.8547	12.6334	2.50071	4.87001
						2010	5	6	126	21.9	12.6	17.25	40.5	15.724	11.6986	7.67226	1.57717	2.59664
						2010	5	7	127	23.6	15.7	19.65	57.5	21.4736	13.5713	9.6569	2.12108	2.75327
						2010	5	8	128	26.4	17.4	21.9	51	24.9188	17.9415	11.961	2.78501	3.68547
						2010	5	9	129	26.5	19.3	22.9	67.5	27.8668	16.0513	11.9639	2.85586	3.39802
						2010	5	10	130	27.9	18.4	23.15	50.5	23.8755	18.1454	11.7743	2.82785	3.80653
						2010	5	11	131	27.5	16.1	21.8	50	21.279	19.4065	11.4954	2.66985	3.94764
						2010	5	12	132	28.9	19.6	24.25	45	19.4378	14.4618	9.48439	2.33907	3.39657
						2010	5	13	133	29.6	22.5	26.05	40	14.1343	8.02829	6.02593	1.54975	2.27486
						2010	5	14	134	30	23.1	26.55	35.5	23.9832	13.2387	10.0798	2.62188	3.66538
						2010	5	15	135	30.2	20.1	25.15	29	4.93147	3.98463	2.50759	0.631667	1.53348
						2010	5	16	136	30.8	20.3	25.55	27.5	19.5767	16.4444	10.1497	2.58054	4.78392
						2010	5	17	137	28.5	21.2	24.85	25	21.1628	12.3591	9.1486	2.28845	3.79075
						2010	5	18	138	24.3	14.2	19.25	25	22.8681	18.4774	11.6281	2.52677	4.86336
						2010	5	19	139	22.1	11.1	16.6	32.5	19.6939	17.3306	10.4508	2.1085	3.95326
						2010	5	20	140	22.5	15.4	18.95	46	15.8579	9.00729	6.76075	1.4572	2.02993
						2010	5	21	141	24.1	14.5	19.3	37	4.93918	3.79329	2.44856	0.532785	1.21682
						2010	5	22	142	24.9	14.7	19.8	37	23.5177	19.1905	12.0175	2.65015	4.4505
						2010	5	23	143	22.6	17.4	20	30.5	4.17144	1.73532	1.52197	0.337417	0.866395
						2010	5	24	144	22.7	12.9	17.8	38	25.5109	20.0006	12.7779	2.66795	4.35342
						2010	5	25	145	25.3	14.6	19.95	38	23.2905	19.9366	12.1896	2.69883	4.56585
						2010	5	26	146	27.7	19.1	23.4	48	15.0066	10.3245	7.04128	1.70144	2.41219
						2010	5	27	147	29.9	21.4	25.65	43.5	26.1384	17.7741	12.193	3.10718	4.24641
						2010	5	28	148	25.1	17.2	21.15	40.5	33.1842	20.9724	14.9233	3.40911	4.75048
						2010	5	29	149	29.5	17.4	23.45	30	11.4206	11.0552	6.35628	1.53778	3.19536
						2010	5	30	150	30.1	20.8	25.45	43	9.23581	6.87144	4.50647	1.14312	1.92266
						2010	5	31	151	32.1	21.2	26.65	38	13.4596	11.7368	7.10994	1.85356	3.21278
						2010	6	1	152	37.2	25.2	31.2	39	13.4738	12.9348	7.46793	2.14617	3.63975
						2010	6	2	153	37.2	27.8	32.5	23	10.6418	8.00265	5.22035	1.54005	2.9664
						2010	6	3	154	33.7	26.2	29.95	47.5	15.0126	9.00757	6.5782	1.84225	2.37409
						2010	6	4	155	35.8	25.9	30.85	42.5	29.0079	22.9743	14.6034	4.16683	5.78811
						2010	6	5	156	37.2	28.5	32.85	39.5	34.7358	24.1761	16.3929	4.86972	6.42849
						2010	6	6	157	35.8	28.8	32.3	31	47.2991	26.4875	20.0227	5.88339	7.69164
						2010	6	7	158	28.9	20.9	24.9	34	37.9982	24.3188	17.196	4.30649	6.27679
						2010	6	8	159	26.3	15.6	20.95	45.5	4.79121	4.10128	2.50759	0.569898	1.19038
						2010	6	9	160	29.4	19.9	24.65	48.5	7.83142	5.95188	3.86209	0.961541	1.58307
						2010	6	10	161	29.5	21.7	25.6	42.5	49.5931	30.9461	22.161	5.64087	7.14937
						2010	6	11	162	31.5	21.1	26.3	42	40.779	33.9282	21.0413	5.44227	7.92292
						2010	6	12	163	33.6	22.7	28.15	34	28.3119	24.688	14.9555	4.03047	6.65331
						2010	6	13	164	36.1	25.8	30.95	30.5	34.0889	28.0893	17.5046	5.00489	8.05695
						2010	6	14	165	37.2	30.3	33.75	26.5	47.8448	26.4103	20.1085	6.07961	8.17004
						2010	6	15	166	36.2	27.7	31.95	25	9.5332	6.48258	4.44701	1.29757	2.45434
						2010	6	16	167	31.3	20	25.65	35	21.6883	19.6062	11.665	2.97264	5.15339
						2010	6	17	168	33.4	22.2	27.8	37	30.2979	27.1469	16.2234	4.33884	6.9803
						2010	6	18	169	33.4	22.2	27.8	46	52.8842	47.3843	28.3175	7.57335	10.5312
						2010	6	19	170	33.5	25.6	29.55	39	50.7139	32.0512	22.8066	6.33357	8.12338
						2010	6	20	171	37.2	21.4	29.3	36.5	24.9303	31.5118	15.8553	4.3799	8.21821
						2010	6	21	172	37.2	22.1	29.65	37.5	47.7181	57.6435	29.6682	8.2565	14.4923
						2010	6	22	173	34.2	24.8	29.5	33.5	62.2505	46.8124	30.537	8.47142	12.4186
						2010	6	23	174	29.6	21.8	25.7	31.5	66.4814	41.4844	29.7076	7.57923	10.7839
						2010	6	24	175	23.5	14.8	19.15	34	59.1428	41.1634	27.9114	6.04872	9.23762
						2010	6	25	176	28.2	16	22.1	41	52.5922	51.33	29.3915	6.878	11.133
						2010	6	26	177	29.2	21	25.1	34.5	66.4983	43.6229	30.4675	7.66589	10.8342
						2010	6	27	178	30.2	20.1	25.15	39	45.7839	36.9934	23.2806	5.86441	8.782
						2010	6	28	179	30.1	18.7	24.4	34.5	51.0139	46.5247	27.5588	6.82089	11.3996
						2010	6	29	180	29.4	20.3	24.85	25.5	56.9669	41.4719	27.4956	6.87781	11.3684
						2010	6	30	181	37.2	20.4	28.8	30	40.6036	54.5713	26.6281	7.27769	14.8495
						2010	7	1	182	37.2	25	31.1	33	23.6316	23.0644	13.2066	3.78764	6.53817
						2010	7	2	183	35.8	24.4	30.1	38	52.6958	48.0585	28.4674	7.99745	12.1542
						2010	7	3	184	36.3	25.4	30.85	38.5	56.8957	49.613	30.0547	8.57558	12.5561
						2010	7	4	185	37.8	26.9	32.35	26.5	47.9643	41.8249	25.3368	7.4523	12.4234
						2010	7	5	186	36.7	29.4	33.05	22	65.5746	38.2956	28.3477	8.45427	12.0557
						2010	7	6	187	37	27.4	32.2	44	55.8951	42.9275	27.7096	8.12583	10.3365
						2010	7	7	188	36.4	0	18.2	37.5	30.9753	90.2001	29.901	6.31331	18.4844
						2010	7	8	189	36.2	27.4	31.8	30	36.9788	26.0331	17.5515	5.1058	7.6164
						2010	7	9	190	34.2	26.4	30.3	21.5	67.6752	42.2293	30.241	8.53119	12.9312
						2010	7	10	191	35.9	25	30.45	28.5	57.0859	49.7789	30.1552	8.5335	14.0814
						2010	7	11	192	36.9	28.7	32.8	34.5	65.6841	43.0887	30.0945	8.93111	11.7384
						2010	7	12	193	35.8	30	32.9	22.5	71.208	33.0405	27.4387	8.15904	10.4187
						2010	7	13	194	36.6	29	32.8	19	63.2279	38.4426	27.8892	8.27665	12.4404
						2010	7	14	195	36.7	26.4	31.55	22.5	51.9003	42.7658	26.6507	7.71371	13.127
						2010	7	15	196	35.5	26.6	31.05	21.5	64.663	46.04	30.8653	8.84307	14.1562
						2010	7	16	197	39.8	26.2	33	17.5	51.4268	55.9524	30.3444	9.04088	18.1136
						2010	7	17	198	36	24.7	30.35	16.5	55.0132	49.7319	29.5887	8.35584	15.8964
						2010	7	18	199	32.9	23.7	28.3	21	60.7244	44.6931	29.4698	7.96794	13.4056
						2010	7	19	200	36.3	25.5	30.9	23.5	55.3788	47.8473	29.1189	8.3171	14.3668
						2010	7	20	201	36.3	27.4	31.85	19.5	62.4455	44.4612	29.8068	8.67967	14.0851
						2010	7	21	202	36.8	27.2	32	27.5	53.2896	40.9264	26.4179	7.71605	11.9975
						2010	7	22	203	36.7	26.7	31.7	24	53.8489	43.0791	27.2456	7.90989	13.0352
						2010	7	23	204	36.3	28.2	32.25	25	62.9023	40.7607	28.6437	8.40816	12.3048
						2010	7	24	205	34.2	24.3	29.25	41	58.1373	46.0448	29.268	8.07644	11.1317
						2010	7	25	206	32.8	25	28.9	47.5	64.2926	40.1186	28.7295	7.86889	8.92146
						2010	7	26	207	36.3	26.5	31.4	28	55.9505	43.8652	28.0244	8.08667	12.6706
						2010	7	27	208	37.3	29	33.15	21	62.891	41.7596	28.99	8.66283	13.2359
						2010	7	28	209	36	31.2	33.6	41	80.2971	30.8341	28.1475	8.48538	7.96356
						2010	7	29	210	35.8	30.3	33.05	38.5	73.1366	32.1801	27.4433	8.18455	8.50775
						2010	7	30	211	37	29.4	33.2	37	62.8967	38.2412	27.7431	8.29837	10.2111
						2010	7	31	212	36.6	28.7	32.65	28	58.1417	36.7456	26.147	7.73661	10.8418
						2010	8	1	213	36.6	30.7	33.65	22	67.203	31.7198	26.1177	7.88112	10.1493
						2010	8	2	214	36.6	28.8	32.7	23	61.6531	38.4715	27.55	8.15984	11.9448
						2010	8	3	215	37.3	29.3	33.3	31	56.9723	36.4623	25.7827	7.72712	10.4761
						2010	8	4	216	36.8	29.5	33.15	44	63.1407	36.8742	27.2955	8.15648	9.02879
						2010	8	5	217	38.2	29.4	33.8	35	56.5157	39.7871	26.8244	8.11799	10.9183
						2010	8	6	218	37.6	30.8	34.2	38	65.0756	35.4011	27.1514	8.28065	9.46384
						2010	8	7	219	36.8	30.3	33.55	48.5	66.271	34.4609	27.0334	8.14158	7.99781
						2010	8	8	220	36.6	28	32.3	46.5	56.3874	38.7945	26.4577	7.77422	9.08765
						2010	8	9	221	36.6	27.3	31.95	47	54.0951	40.2467	26.3948	7.70159	9.31406
						2010	8	10	222	35.4	25.6	30.5	49	52.0099	40.7758	26.0507	7.37962	9.03485
						2010	8	11	223	36.7	28.7	32.7	54.5	58.2953	37.309	26.3814	7.81372	8.37291
						2010	8	12	224	37.4	30.8	34.1	45	65.1986	34.4249	26.7997	8.15766	8.42302
						2010	8	13	225	37.4	29.5	33.45	51	56.6725	35.817	25.4863	7.66069	8.11305
						2010	8	14	226	36.6	29.5	33.05	45	60.4873	34.3568	25.7877	7.69081	8.32649
						2010	8	15	227	36.6	28.3	32.45	33	54.1828	35.9774	24.9759	7.3608	10.0303
						2010	8	16	228	37	28.8	32.9	33	53.1771	34.8842	24.3642	7.24481	9.78457
						2010	8	17	229	36.6	27.4	32	34	49.6604	36.55	24.1004	7.03916	10.0196
						2010	8	18	230	36.6	26.6	31.6	47	52.8253	42.2602	26.7277	7.74385	9.72262
						2010	8	19	231	36.9	27.1	32	48.5	51.9054	40.6938	25.9983	7.59352	9.22362
						2010	8	20	232	36.6	27.6	32.1	50	53.4854	38.5095	25.673	7.51355	8.57762
						2010	8	21	233	36.6	27.2	31.9	51.5	41.4799	31.1929	20.348	5.93124	7.01779
						2010	8	22	234	37.5	24.4	30.95	22.5	42.9948	45.0586	24.8984	7.11892	13.7123
						2010	8	23	235	36.6	27.5	32.05	23	50.6161	36.8485	24.4303	7.1427	11.3942
						2010	8	24	236	36.6	28.8	32.7	32	55.6329	34.715	24.8599	7.36307	9.83291
						2010	8	25	237	36.6	27	31.8	31.5	50.4543	38.7489	25.0123	7.27618	10.8758
						2010	8	26	238	35.8	26.8	31.3	27.5	26.2708	18.915	12.61	3.63132	5.81689
						2010	8	27	239	33.4	23.9	28.65	30.5	38.6188	29.3503	19.045	5.18841	8.17925
						2010	8	28	240	35.9	24.7	30.3	25	39.8188	35.6776	21.3215	6.01492	10.628
						2010	8	29	241	36.3	28.4	32.35	22.5	46.8873	29.6328	21.0857	6.20194	9.35823
						2010	8	30	242	35	28.4	31.7	22	53.2258	28.1032	21.8783	6.35166	8.89491
						2010	8	31	243	35.9	28.1	32	26.5	45.4975	28.3904	20.3308	5.93816	8.59308
						2010	9	1	244	36.3	28.7	32.5	28	46.4169	28.2215	20.474	6.04003	8.44984
						2010	9	2	245	35.5	27	31.25	35	34.6619	23.5701	16.1689	4.65145	6.52648
						2010	9	3	246	32.9	26.5	29.7	23	53.8576	27.5751	21.8	6.07322	8.46701
						2010	9	4	247	33.9	25.2	29.55	29.5	43.9556	30.5931	20.7441	5.76079	8.68851
						2010	9	5	248	36.1	27.9	32	28.5	39.5991	25.977	18.1431	5.29918	7.74341
						2010	9	6	249	34	26.3	30.15	23.5	44.8602	27.6339	19.9171	5.60123	8.48255
						2010	9	7	250	33.1	23.9	28.5	18	31.6753	23.313	15.3722	4.1743	7.51804
						2010	9	8	251	32.6	25.1	28.85	15.5	35.7002	21.4201	15.6431	4.27997	7.15832
						2010	9	9	252	33.4	24.4	28.9	25	41.2018	29.6653	19.7769	5.4168	8.79502
						2010	9	10	253	34.7	25.5	30.1	29	38.0105	27.9758	18.4467	5.18229	8.08662
						2010	9	11	254	33.4	26.7	30.05	29.5	35.5453	19.0523	14.7211	4.13133	5.65215
						2010	9	12	255	33.3	26.9	30.1	30.5	22.4488	11.4938	9.08663	2.55274	3.59333
						2010	9	13	256	30.1	22.8	26.45	28.5	38.3662	22.4058	16.5855	4.30438	6.334
						2010	9	14	257	28.4	18.3	23.35	20	30.6527	24.7674	15.5865	3.76173	7.24184
						2010	9	15	258	30.9	21.5	26.2	32	21.8197	16.4084	10.7036	2.76218	4.58442
						2010	9	16	259	31.6	24	27.8	33	34.0863	20.7245	15.0351	4.02105	5.70945
						2010	9	17	260	33.1	24.3	28.7	26	29.9375	21.076	14.2094	3.87523	6.33348
						2010	9	18	261	32.2	23.4	27.8	27	12.9932	9.14719	6.16703	1.64934	3.00611
						2010	9	19	262	32	21.8	26.9	44	24.723	20.174	12.6334	3.31205	4.81081
						2010	9	20	263	33.1	23.6	28.35	39.5	15.5576	11.8237	7.67226	2.07665	3.2439
						2010	9	21	264	33.3	26.2	29.75	27.5	22.6511	12.8658	9.6569	2.69312	4.07295
						2010	9	22	265	32	23.8	27.9	41.5	26.106	17.1255	11.961	3.20591	4.34443
						2010	9	23	266	31.5	22.9	27.2	48.5	25.4979	17.5426	11.9639	3.15758	4.00685
						2010	9	24	267	32.8	24.9	28.85	48	26.1818	16.5469	11.7743	3.22146	3.90973
						2010	9	25	268	31.3	18.4	24.85	46	20.0037	20.6438	11.4954	2.87549	4.64585
						2010	9	26	269	30.2	20	25.1	45	18.5605	15.1454	9.48439	2.38635	3.58323
						2010	9	27	270	30.8	22	26.4	51.5	12.6959	8.9379	6.02593	1.56212	2.18001
						2010	9	28	271	29.3	23.9	26.6	46.5	27.1103	11.7117	10.0798	2.62484	2.87257
						2010	9	29	272	28.9	20.6	24.75	54.5	5.43999	3.61215	2.50759	0.625785	1.10062
						2010	9	30	273	30.5	22.1	26.3	39.5	21.8874	14.7083	10.1497	2.62519	3.81356
						2010	10	1	274	26.6	21.2	23.9	39	24.6058	10.6297	9.1486	2.23748	2.80333
						2010	10	2	275	25.7	16.4	21.05	31	23.8314	17.7305	11.6281	2.64953	4.56158
						2010	10	3	276	26.1	17.9	22	49	22.8098	14.9632	10.4508	2.43949	3.18822
						2010	10	4	277	27.2	19.7	23.45	63.5	15.4292	9.25754	6.76075	1.63564	2.14541
						2010	10	5	278	24.9	20.1	22.5	54.5	6.98505	2.68226	2.44856	0.57874	0.88764
						2010	10	6	279	23.9	15.7	19.8	48.5	26.2294	17.2065	12.0175	2.65015	3.47643
						2010	10	7	280	25.3	16.4	20.85	42.5	3.18854	2.27024	1.52197	0.345005	0.870348
						2010	10	8	281	24.7	17.3	21	32	29.3578	17.3798	12.7779	2.90776	4.42614
						2010	10	9	282	21.6	15.7	18.65	33.5	31.3649	14.8042	12.1896	2.60589	3.58684
						2010	10	10	283	20	13.9	16.95	41.5	17.8183	8.69534	7.04128	1.43507	1.98914
						2010	10	11	284	17	10	13.5	52	28.8032	16.1298	12.193	2.23832	2.67543
						2010	10	12	285	20.3	12	16.15	49	32.3747	21.4968	14.9233	2.97148	3.84508
						2010	10	13	286	20.5	13.8	17.15	41	15.3478	8.22642	6.35628	1.30292	1.92532
						2010	10	14	287	22.7	15.6	19.15	27.5	10.5703	6.00393	4.50647	0.976605	1.85927
						2010	10	15	288	23.4	17.2	20.3	20	17.8464	8.85181	7.10994	1.58876	2.7866
						2010	10	16	289	27.3	16	21.65	25	13.8849	12.5519	7.46793	1.72789	3.63889
						2010	10	17	290	24.4	17.7	21.05	32	12.605	6.75627	5.22035	1.18948	2.01304
						2010	10	18	291	25.1	17.9	21.5	41.5	15.3222	8.82558	6.5782	1.51624	2.23525
						2010	10	19	292	27.9	18.8	23.35	38	30.2562	22.0265	14.6034	3.52446	5.33228
						2010	10	20	293	29.5	21	25.25	69	35.1421	23.8966	16.3929	4.13903	5.05367
						2010	10	21	294	29.7	21.9	25.8	54.5	44.8079	27.9601	20.0227	5.12007	5.89071
						2010	10	22	295	26.4	17.9	22.15	78	36.8636	25.0673	17.196	4.02914	5.01953
						2010	10	23	296	25.5	17.8	21.65	72.5	5.64796	3.47915	2.50759	0.580193	1.01985
						2010	10	24	297	26.3	18.5	22.4	85	8.64281	5.39311	3.86209	0.910576	1.38938
						2010	10	25	298	23.6	17.4	20.5	73	55.6253	27.5902	22.161	4.978	5.31317
						2010	10	26	299	23.7	16.5	20.1	79.5	49.0103	28.2299	21.0413	4.67714	5.38244
						2010	10	27	300	23.1	16.1	19.6	69.5	35.3292	19.7843	14.9555	3.28051	3.84128
						2010	10	28	301	23.7	16.3	20	70.5	40.2176	23.8088	17.5046	3.88072	4.58779
						2010	10	29	302	21.3	16	18.65	46	54.5911	23.1466	20.1085	4.29878	4.58374
						2010	10	30	303	16	9.1	12.55	35.5	10.5809	5.84067	4.44701	0.79158	1.35192
						2010	10	31	304	15	7.5	11.25	34	26.6216	15.9729	11.665	1.98746	2.94831
						2010	11	1	305	16	7.6	11.8	38	34.985	23.5099	16.2234	2.81644	4.0932
						2010	11	2	306	16.6	9.5	13.05	46.5	66.4211	37.7272	28.3175	5.12364	6.02975
						2010	11	3	307	18.2	11.4	14.8	51.5	54.662	29.7362	22.8066	4.3606	4.89995
						2010	11	4	308	20.8	11.7	16.25	58	32.8499	23.9148	15.8553	3.16636	4.19197
						2010	11	5	309	20	12	16	54	65.5582	41.9572	29.6682	5.88134	7.04756
						2010	11	6	310	22.7	13.4	18.05	59	62.5843	46.5627	30.537	6.42073	8.23711
						2010	11	7	311	20.4	13.9	17.15	51	72.8268	37.8699	29.7076	6.08952	6.60799
						2010	11	8	312	20.7	12.4	16.55	34	60.5511	40.206	27.9114	5.6231	8.45006
						2010	11	9	313	21.6	14.2	17.9	38	67.5283	39.9767	29.3915	6.154	8.31139
						2010	11	10	314	22.6	16	19.3	42	74.1217	39.1363	30.4675	6.62948	8.01301
						2010	11	11	315	20.7	14.7	17.7	36.5	59.4015	28.5127	23.2806	4.84719	6.12542
						2010	11	12	316	22.1	14.2	18.15	37	61.2812	38.7297	27.5588	5.81069	8.21495
						2010	11	13	317	22.2	16	19.1	60.5	69.0156	34.2318	27.4956	5.95056	6.30678
						2010	11	14	318	21.6	13.8	17.7	78	59.5899	37.1841	26.6281	5.54416	6.59012
						2010	11	15	319	23.3	15.1	19.2	47.5	28.8247	18.909	13.2066	2.86591	3.78509
						2010	11	16	320	23.6	16.8	20.2	38.5	68.2297	37.117	28.4674	6.34453	8.12069
						2010	11	17	321	21.4	16.2	18.8	38.5	82.3741	34.2676	30.0547	6.45151	7.29891
						2010	11	18	322	21.7	13.6	17.65	45	55.6403	36.0549	25.3368	5.26788	6.84893
						2010	11	19	323	20.5	15	17.75	47.5	75.5468	33.2406	28.3477	5.91051	6.14808
						2010	11	20	324	21	14.1	17.55	33.5	65.9303	36.3935	27.7096	5.74496	7.94842
						2010	11	21	325	21.3	14.6	17.95	27	72.1986	38.6985	29.901	6.26946	9.15151
						2010	11	22	326	19.4	14.6	17	32.5	50.0695	19.2267	17.5515	3.58229	4.38824
						2010	11	23	327	18.6	12.1	15.35	49	74.1344	38.5499	30.241	5.8796	6.46285
						2010	11	24	328	16.3	10.7	13.5	51	79.6431	35.6801	30.1552	5.53572	5.54624
						2010	11	25	329	16.7	11.4	14.05	53.5	81.7013	34.6413	30.0945	5.62166	5.50717
						2010	11	26	330	17.8	12	14.9	75.5	71.208	33.0405	27.4387	5.26234	5.42702
						2010	11	27	331	19.2	11.9	15.55	82	64.5141	37.6762	27.8892	5.45506	6.27473
						2010	11	28	332	18.2	11.9	15.05	67	66.3618	33.4463	26.6507	5.13466	5.5173
						2010	11	29	333	21.9	14.2	18.05	56	69.5193	42.8239	30.8653	6.48975	7.6041
						2010	11	30	334	20.7	14.1	17.4	54	73.8222	38.9781	30.3444	6.26455	6.83709
						2010	12	1	335	19.6	13.6	16.6	35.5	75.4971	36.2386	29.5887	5.9697	7.53467
						2010	12	2	336	19.6	13.8	16.7	40.5	76.4791	35.4863	29.4698	5.96299	6.96951
						2010	12	3	337	22.6	14.2	18.4	30.5	62.7936	42.1973	29.1189	6.18232	9.67024
						2010	12	4	338	18.3	16.7	17.5	36.5	147.277	18.8515	29.8068	6.17104	4.16977
						2010	12	5	339	22.7	15.1	18.9	38	59.8923	36.4145	26.4179	5.68633	7.79563
						2010	12	6	340	18.2	13	15.6	35.5	74.675	31.0648	27.2456	5.33718	6.32514
						2010	12	7	341	13.2	9.7	11.45	50	95.6918	26.7937	28.6437	4.91386	3.8761
						2010	12	8	342	15	8.7	11.85	47	72.879	36.731	29.268	5.08962	5.53895
						2010	12	9	343	15	8.8	11.9	56	72.1128	35.768	28.7295	5.00441	5.19175
						2010	12	10	344	12.4	6.3	9.35	51.5	70.9172	34.6076	28.0244	4.46246	4.3683
						2010	12	11	345	10.1	5.8	7.95	59	87.3762	30.0574	28.99	4.37817	3.45217
						2010	12	12	346	7.8	3.7	5.75	38	86.8817	28.4972	28.1475	3.88776	3.07799
						2010	12	13	347	4.8	1.8	3.3	70.5	99.0274	23.7666	27.4433	3.39615	1.44542
						2010	12	14	348	3.7	1.6	2.65	71.5	119.653	20.1018	27.7431	3.32748	1.03289
						2010	12	15	349	8.7	3.3	6	63	70.3242	30.38	26.147	3.64978	2.87592
						2010	12	16	350	10.4	4.3	7.35	60	66.0921	32.2529	26.1177	3.85248	3.50114
						2010	12	17	351	10.2	6.1	8.15	55.5	85.0375	27.8923	27.55	4.19303	3.27215
						2010	12	18	352	9.8	4.8	7.3	51	72.0649	28.8259	25.7827	3.79551	3.13734
						2010	12	19	353	11.1	5.7	8.4	42	73.4131	31.7145	27.2955	4.1943	4.19175
						2010	12	20	354	11.1	4.4	7.75	44	64.7699	34.7167	26.8244	4.01966	4.22011
						2010	12	21	355	12.7	6.8	9.75	40.5	69.8629	32.9753	27.1514	4.38715	4.86338
						2010	12	22	356	11.1	5.9	8.5	33.5	74.0932	30.8228	27.0334	4.16988	4.56032
						2010	12	23	357	13.2	7	10.1	44	66.4103	32.9395	26.4577	4.32936	4.74416
						2010	12	24	358	12.2	7.3	9.75	42	74.5249	29.2137	26.3948	4.2649	4.25975
						2010	12	25	359	11.5	6	8.75	40.5	69.4253	30.5471	26.0507	4.0565	4.23338
						2010	12	26	360	11.8	5.8	8.8	52	67.3136	32.3105	26.3814	4.11574	3.94305
						2010	12	27	361	15.5	7.7	11.6	65	59.974	37.4238	26.7997	4.6211	5.34179
						2010	12	28	362	16	10	13	75.5	65.0295	31.2142	25.4863	4.60389	4.79342
						2010	12	29	363	15.2	9.8	12.5	63.5	69.358	29.9626	25.7877	4.58273	4.51651
						2010	12	30	364	10.5	6.3	8.4	70	76.1686	25.5927	24.9759	3.83787	3.08058
						2010	12	31	365	7.4	0.9	4.15	77.5	59.7275	31.0583	24.3642	3.13656	2.22691
																	1454.33	1918.87
																	ETo-HS	ETo-TURC (Ousman Couly (2016)

## Sheet: 2011
	MARDİN					year	month	day	DOY	Tmax	Tmin	Tmean	Rhmean	Ra	Rs=0.16(Tmax-Tmin)^0.5*Ra	Rs=from meteorological station	ETo-HS	ETo-TURC (Ousman Couly (2016)
	DOY	246					#	#		°C	°C	°C	%	MJ m-2 day-1*(0.408 mm day-1)
	φ (-)	37.31	0.651182			2011	1	1	1	5.9	1.3	3.6	55.5	27.3893	10.0793	9.39898	1.17968	0.730157
	tan(φ)		0.762072			2011	1	2	2	6	0.7	3.35	51.5	26.2793	11.1424	9.67993	1.20074	0.748876
	sin(φ)		0.606127			2011	1	3	3	7.2	1.4	4.3	60	27.0313	12.5425	10.416	1.35009	1.01063
	cos(φ)		0.795368			2011	1	4	4	6.7	2.4	4.55	57.5	3.50575	1.20598	1.16315	0.152469	0.237799
	dr	0.984766		(1+0.033*cos(2*3.14/365*DOY))		2011	1	5	5	6.3	2.7	4.5	73	36.4168	10.488	11.0554	1.44592	0.899813
	δ	0.120494		(0.409*sin(2*3.14/365*DOY-1.39))		2011	1	6	6	9.6	1.4	5.5	82.5	19.0072	12.4687	8.70854	1.19006	1.21086
	tan(δ)	0.121081				2011	1	7	7	11.1	4.8	7.95	83	30.6031	15.424	12.2901	1.8561	1.88075
	sin(δ)	0.120203				2011	1	8	8	9.9	4.5	7.2	83	14.0698	6.07815	5.23124	0.76703	0.82123
	cos(δ)	0.992749				2011	1	9	9	7.7	3.3	5.5	84	32.1705	11.324	10.797	1.47546	1.11565
	X	0.991486				2011	1	10	10	6.7	1	3.85	95	31.4884	14.3587	12.0284	1.52733	1.04146		-
	ωs (eq. 25)	1.49187		(acos{(-1*tan(-0.35)*tan(0.409*sin(2*3.14/365*DOY-1.39))))		2011	1	11	11	5.6	0.6	3.1	77	35.2027	14.0811	12.5945	1.54381	0.858586
	sin ωs	0.996887				2011	1	12	12	7.9	0	3.95	65.5	28.1696	17.8032	12.6682	1.616	1.28545
	sin φ*sin δ	-0.0728584		(sin(0.35)*sin(0.409*sin(2*3.14/365*DOY-1.39)))		2011	1	13	13	8.4	1.9	5.15	69.5	30.7506	15.9903	12.5438	1.68842	1.43252
	cos φ*cos δ	0.789601		(cos(0.35)*cos(0.409*sin(2*3.14/365*DOY-1.39))		2011	1	14	14	7.3	2.8	5.05	73.5	22.6169	8.1421	7.67645	1.02876	0.79892
	Gsc	0.082				2011	1	15	15	7.6	2.9	5.25	66	32.0309	12.0436	11.1106	1.50203	1.13592
						2011	1	16	16	7.9	0.7	4.3	57	28.3662	16.3389	12.1783	1.57851	1.27284
	Ra	25.1244				2011	1	17	17	7.5	0.5	4	52.5	23.2396	13.0142	9.83778	1.25783	0.985745
						2011	1	18	18	9.1	1.9	5.5	55	29.9549	17.254	12.8604	1.75743	1.60885
						2011	1	19	19	8.3	1.7	5	49.5	32.2015	17.0024	13.2364	1.76999	1.49023
						2011	1	20	20	9.9	2.2	6.05	65	28.6651	17.6577	12.7268	1.78023	1.75947
						2011	1	21	21	10.1	4.6	7.35	73	34.7517	15.2907	13.04	1.92346	1.7719
						2011	1	22	22	10.7	4.3	7.5	66.5	32.7763	16.7815	13.2669	1.96861	1.95005
						2011	1	23	23	9.8	4	6.9	65.5	33.2673	15.436	12.8189	1.85702	1.71179
						2011	1	24	24	8.9	4.3	6.6	69	26.6744	9.81616	9.15362	1.30994	1.12778
						2011	1	25	25	9.8	4.4	7.1	74	31.7713	13.7252	11.8128	1.72512	1.57508
						2011	1	26	26	5.8	3	4.4	69	7.46754	1.67273	1.99929	0.260314	0.264555
						2011	1	27	27	5.3	3.7	4.5	76.5	2.38328	0.30506	0.482342	0.0630853	0.171339
						2011	1	28	28	7	3.5	5.25	77	7.20791	2.01821	2.15756	0.291677	0.330179
						2011	1	29	29	4.9	2.7	3.8	75	6.03566	1.06228	1.43237	0.181459	0.19752
						2011	1	30	30	6.6	4.1	5.35	70.5	4.12937	0.825873	1.04466	0.141838	0.23764
						2011	1	31	31	6.2	2.7	4.45	76.5	11.6099	3.25076	3.47521	0.453502	0.378796
						2011	2	1	32	4.3	-1.9	1.2	90.5	35.5604	17.6379	14.1671	1.57871	0.453012
						2011	2	2	33	0.8	-1.9	-0.55	81	59.7392	12.9037	15.7059	1.58898	-0.176915
						2011	2	3	34	3	-4.7	-0.85	55.5	35.673	21.9746	15.8382	1.5745	-0.448128
						2011	2	4	35	1.6	-1.9	-0.15	54.5	14.7207	4.12181	4.4064	0.456138	-0.0194511
						2011	2	5	36	2.8	-3.2	-0.2	62	38.8874	18.6659	15.2407	1.5732	-0.0869506
						2011	2	6	37	7.1	-1.1	3	65.5	35.1102	23.0323	16.0865	1.96242	1.29799
						2011	2	7	38	8.4	1	4.7	83	34.8343	20.6219	15.1615	2.00076	1.67976
						2011	2	8	39	9.4	1.6	5.5	68.5	36.5296	22.7944	16.3234	2.23067	2.06966
						2011	2	9	40	10.4	3.6	7	58	38.7692	21.0905	16.1756	2.35278	2.28644
						2011	2	10	41	8.9	1.8	5.35	58.5	37.6693	21.3961	16.0597	2.1805	1.91409
						2011	2	11	42	3.3	-1.7	0.8	69.5	48.2153	19.2861	17.25	1.88179	0.335524
						2011	2	12	43	6.7	-3.7	1.5	82.5	32.9468	27.4118	17.0001	1.92431	0.831413
						2011	2	13	44	3.8	0.6	2.2	69	21.3463	5.46466	6.10967	0.716664	0.299551
						2011	2	14	45	3.6	0.3	1.95	53.5	12.1265	3.20139	3.52462	0.40827	0.188711
						2011	2	15	46	4.2	0.9	2.55	45.5	4.17325	1.10174	1.21297	0.144772	0.153007
						2011	2	16	47	7.4	3.3	5.35	65	18.1955	5.96811	5.89488	0.800375	0.656726
						2011	2	17	48	6.9	0.3	3.6	86.5	20.1839	10.6571	8.29654	1.04131	0.764826
						2011	2	18	49	9.8	3.3	6.55	75	41.0846	21.364	16.7593	2.39344	2.2099
						2011	2	19	50	8.6	4.6	6.6	76	33.3848	10.6831	10.6831	1.52882	1.2099
						2011	2	20	51	11.2	5.9	8.55	68	31.6036	13.3999	11.6411	1.79905	1.74336
						2011	2	21	52	10.3	4.9	7.6	79	21.2488	9.17949	7.90045	1.17694	1.17482
						2011	2	22	53	9.4	5	7.2	65.5	31.6752	11.1497	10.6308	1.55874	1.33112
						2011	2	23	54	11.7	7.4	9.55	66.5	23.2493	7.99774	7.71371	1.23734	1.21649
						2011	2	24	55	12.8	6.6	9.7	69	33.3544	16.5438	13.2883	2.14323	2.26849
						2011	2	25	56	13.4	9.1	11.25	53	22.9211	7.88487	7.60485	1.2957	1.32523
						2011	2	26	57	12.9	5.3	9.1	53.5	22.5454	13.7076	9.94454	1.56894	1.84917
						2011	2	27	58	9.5	4.1	6.8	54	22.9358	9.90825	8.52766	1.23036	1.1602
						2011	2	28	59	7.8	4.7	6.25	55.5	20.9492	5.1954	5.90158	0.832437	0.664257
						2011	3	1	60	11.9	3.6	7.75	81	38.6658	25.6741	17.8232	2.67082	2.93201
						2011	3	2	61	10.5	3.6	7.05	79	48.3858	26.7089	20.3358	2.96385	2.85443
						2011	3	3	62	7.8	2.4	5.1	63.5	55.2702	23.8767	20.5498	2.76001	2.04246
						2011	3	4	63	9	0.6	4.8	49.5	46.3643	31.1568	21.5002	2.84984	2.5164
						2011	3	5	64	9.2	2.7	5.95	77	52.4574	27.2778	21.3985	2.98068	2.58563
						2011	3	6	65	11.5	4.7	8.1	45	46.0046	25.0265	19.1945	2.91571	3.15814
						2011	3	7	66	9.2	4.8	7	32.5	8.68417	3.05683	2.91457	0.42393	0.63458
						2011	3	8	67	9.7	7.7	8.7	43.5	14.7015	2.35224	3.32657	0.517024	0.552457
						2011	3	9	68	12.5	4.3	8.4	45	23.6277	15.4997	10.8255	1.66348	2.09724
						2011	3	10	69	7.3	1.3	4.3	44.5	24.0696	11.5534	9.43331	1.22271	1.01635
						2011	3	11	70	4.3	-1.5	1.4	44	15.1917	7.04896	5.85384	0.65919	0.262578
						2011	3	12	71	7	0.5	3.75	62	55.0378	28.6197	22.4511	2.83761	1.904
						2011	3	13	72	9.4	0.4	4.9	63.5	42.8949	30.8844	20.5896	2.7412	2.51699
						2011	3	14	73	10	0.9	5.45	50	1.70201	1.23906	0.821489	0.112019	0.275034
						2011	3	15	74	12.6	3.1	7.85	46	38.2928	29.1025	18.8842	2.84089	3.5118
						2011	3	16	75	15.6	5.7	10.65	42.5	43.7556	34.6544	22.0278	3.67554	5.23624
						2011	3	17	76	17	8.8	12.9	66	48.3081	31.6901	22.1333	3.98523	4.84181
						2011	3	18	77	17.6	11.6	14.6	77	47.9223	23.0027	18.7816	3.569	3.83681
						2011	3	19	78	17.6	13.1	15.35	64	39.7419	14.3071	13.4888	2.62256	2.57086
						2011	3	20	79	16.9	12.3	14.6	48.5	33.6449	12.3813	11.5457	2.19397	2.26016
						2011	3	21	80	19.2	11.6	15.4	49.5	33.6069	20.433	14.8237	2.88643	3.56226
						2011	3	22	81	15	7.6	11.3	47	34.0186	20.139	14.8065	2.52705	3.08766
						2011	3	23	82	12.4	4.8	8.6	61	42.1539	25.6295	18.5936	2.87896	3.13137
						2011	3	24	83	13.4	5.7	9.55	69	45.0158	27.7298	19.9862	3.20595	3.59598
						2011	3	25	84	12.2	4.1	8.15	54	53.6579	34.7703	24.4341	3.71879	4.02279
						2011	3	26	85	16.5	4.6	10.55	48.5	45.653	43.4616	25.1978	4.1897	5.95573
						2011	3	27	86	17.6	10.8	14.2	46	59.5783	32.4106	24.8578	4.66531	5.49829
						2011	3	28	87	15.4	9.6	12.5	66	55.5969	25.797	21.4232	3.80711	3.92953
						2011	3	29	88	16.4	9.7	13.05	66	57.7435	30.9505	23.9145	4.32697	4.76526
						2011	3	30	89	18.5	11.6	15.05	61.5	56.24	31.0445	23.6369	4.554	5.14439
						2011	3	31	90	19.6	12.6	16.1	52	55.0466	30.8261	23.3023	4.63305	5.28245
						2011	4	1	91	21.8	14.7	18.25	45.5	48.9329	27.7939	20.8617	4.41086	5.41163
						2011	4	2	92	22.5	17	19.75	37.5	39.956	17.5806	14.9928	3.30188	4.08459
						2011	4	3	93	20.2	11.1	15.65	43	13.2873	9.67314	6.41323	1.25817	2.04815
						2011	4	4	94	16.8	8.8	12.8	42.5	14.7505	9.44035	6.67533	1.19802	1.8221
						2011	4	5	95	12.4	7	9.7	59.5	19.2252	8.30528	7.14805	1.15289	1.26553
						2011	4	6	96	14.1	7.6	10.85	55	37.7826	19.647	15.4123	2.58977	2.82833
						2011	4	7	97	15.5	7.9	11.7	45.5	43.3689	26.3683	19.1296	3.30975	4.11437
						2011	4	8	98	12.1	5.5	8.8	34.5	22.0683	11.6521	9.07114	1.41518	1.92392
						2011	4	9	99	12.1	7.7	9.9	41	24.1038	8.48455	8.0897	1.31426	1.47092
						2011	4	10	100	10.5	6.8	8.65	65	5.60641	1.6595	1.72546	0.26767	0.425128
						2011	4	11	101	10.9	7.1	9	66	30.1644	9.16997	9.40819	1.4788	1.30897
						2011	4	12	102	10.1	1.5	5.8	63.5	4.91059	3.37848	2.30411	0.318921	0.472708
						2011	4	13	103	9.6	-0.1	4.75	56.5	49.8507	38.6842	24.8415	3.28543	3.04
						2011	4	14	104	12.5	5.2	8.85	47.5	62.1431	36.2916	26.8642	4.19894	4.57277
						2011	4	15	105	16.2	9.3	12.75	43.5	58.8033	32.4594	24.7142	4.42818	5.37791
						2011	4	16	106	17.7	11.5	14.6	58	59.0946	29.3109	23.5431	4.4738	4.80137
						2011	4	17	107	21	13.6	17.3	67.5	56.2587	33.3051	24.4864	5.04081	5.87691
						2011	4	18	108	24.1	16.7	20.4	70	48.1636	28.5128	20.9631	4.69663	5.46701
						2011	4	19	109	25	16.4	20.7	64	36.5496	25.1462	17.1495	3.87241	4.89564
						2011	4	20	110	18.6	12	15.3	67	49.0403	25.8933	20.1579	3.91328	4.38035
						2011	4	21	111	20.2	11.4	15.8	63.5	51.401	36.1863	24.3968	4.80773	6.08693
						2011	4	22	112	16.2	9.1	12.65	79	14.5301	8.2531	6.19467	1.1063	1.46692
						2011	4	23	113	13	6.9	9.95	66.5	31.0573	15.156	12.2729	1.99747	2.13207
						2011	4	24	114	16.1	8	12.05	42.5	49.3106	31.9533	22.4545	3.93111	5.20495
						2011	4	25	115	16.2	10.3	13.25	31.5	30.3091	14.3059	11.7793	2.14511	3.01397
						2011	4	26	116	15.2	7.2	11.2	38.5	40.549	25.9513	18.3504	3.12112	4.3265
						2011	4	27	117	17.4	9.3	13.35	41	61.8329	40.0677	28.1567	5.14409	6.94538
						2011	4	28	118	19.6	13.6	16.6	38.5	52.077	24.997	20.41	4.11783	5.13574
						2011	4	29	119	17.4	11.4	14.4	36.5	30.2713	14.5302	11.8639	2.24053	3.01024
						2011	4	30	120	18.4	8.4	13.4	31	30.477	24.3816	15.4203	2.82173	4.9229
						2011	5	1	121	15.8	10	12.9	28.5	28.7764	13.3522	11.0884	1.99653	2.89321
						2011	5	2	122	15.7	10.1	12.9	24	28.8832	12.9397	10.936	1.96909	2.95441
						2011	5	3	123	19.5	8.5	14	23	42.4168	37.3268	22.5089	4.19807	8.17422
						2011	5	4	124	20.1	14.1	17.1	30.5	61.7092	29.6204	24.1849	4.95038	6.69544
						2011	5	5	125	20.6	13.4	17	36.5	56.3062	32.4323	24.1736	4.93389	6.78187
						2011	5	6	126	20.7	13.8	17.25	40.5	49.4079	27.2732	20.7654	4.26871	5.52959
						2011	5	7	127	19.9	11.8	15.85	50.5	52.3632	33.9314	23.8445	4.70589	5.73715
						2011	5	8	128	19	12.8	15.9	51	63.3867	31.4398	25.2531	4.99128	5.34849
						2011	5	9	129	20.9	13.3	17.1	62.5	67.1388	40.8204	29.6142	6.06169	7.08623
						2011	5	10	130	21.9	16	18.95	59	58.5421	27.6319	22.7517	4.90388	5.14289
						2011	5	11	131	25.7	14.9	20.3	67.5	45.7341	39.5143	24.0476	5.3736	7.41687
						2011	5	12	132	21.8	9.9	15.85	68	43.4728	41.3861	23.9944	4.73548	6.92446
						2011	5	13	133	16.8	8	12.4	76	59.3262	41.7657	28.1584	4.9875	6.1526
						2011	5	14	134	16.6	9.1	12.85	71.5	63.5812	38.1487	27.8599	5.00815	5.75551
						2011	5	15	135	18.1	9.5	13.8	66	58.1364	39.9978	27.2783	5.0556	6.2518
						2011	5	16	136	21.8	14	17.9	65	62.3277	38.8925	27.8515	5.83156	6.91222
						2011	5	17	137	22.2	15.4	18.8	59.5	68.1976	37.0995	28.454	6.10791	6.75729
						2011	5	18	138	25.5	17.8	21.65	54.5	57.0398	35.1365	25.3247	5.85947	6.81708
						2011	5	19	139	23.3	14.7	19	56	56.7399	39.037	26.623	5.7461	7.12465
						2011	5	20	140	22.8	16.5	19.65	49	48.6836	24.5366	19.5512	4.29431	4.74784
						2011	5	21	141	23.1	16.2	19.65	68.5	65.4422	36.1241	27.5044	6.04118	6.71807
						2011	5	22	142	23.3	13.3	18.3	57.5	60.4485	48.3588	30.5848	6.47561	8.59447
						2011	5	23	143	23.9	15.3	19.6	47.5	62.1198	42.7385	29.1474	6.39351	8.15334
						2011	5	24	144	24.7	15.4	20.05	41.5	62.8126	46.7326	30.6484	6.80365	9.70913
						2011	5	25	145	27.1	16.8	21.95	40.5	57.7425	47.5798	29.6507	6.91257	10.3883
						2011	5	26	146	27.6	18.2	22.9	46	54.8393	41.2392	26.9015	6.42153	8.5797
						2011	5	27	147	27.9	19.2	23.55	53.5	54.9791	38.2655	25.9464	6.29247	7.64242
						2011	5	28	148	25.1	18.8	21.95	55	51.801	26.1077	20.8031	4.84991	5.19273
						2011	5	29	149	23.4	18.3	20.85	48.5	53.2201	21.7138	19.2301	4.35911	4.38362
						2011	5	30	150	29.8	16	22.9	34.5	47.3313	52.2537	28.1325	6.71537	12.433
						2011	5	31	151	30.3	21	25.65	34.5	62.2797	46.3361	30.3884	7.74401	11.5701
						2011	6	1	152	33.2	22.5	27.85	34.5	32.5425	27.8564	17.0319	4.56007	7.36967
						2011	6	2	153	28.7	17	22.85	36	51.3364	48.0509	28.0956	6.69834	11.2604
						2011	6	3	154	28.8	19.8	24.3	29.5	63.6058	45.7961	30.5308	7.53855	11.8669
						2011	6	4	155	29.5	19.9	24.7	29	61.3706	47.1327	30.424	7.58356	12.3417
						2011	6	5	156	30.5	22.1	26.3	29	57.3527	38.541	26.5958	6.87892	10.4272
						2011	6	6	157	31.7	20.1	25.9	27.5	46.8311	43.4593	25.5202	6.54084	11.8158
						2011	6	7	158	31.6	20.7	26.15	43	56.2148	49.0193	29.695	7.65439	11.0753
						2011	6	8	159	32.8	24	28.4	38.5	61.4513	43.2617	29.1671	7.90319	10.7113
						2011	6	9	160	30.8	21.6	26.2	29	63.8803	47.0159	31.0014	8.00022	12.5847
						2011	6	10	161	31.4	19.7	25.55	40.5	56.8356	53.1981	31.1052	7.90843	12.2649
						2011	6	11	162	27.4	20.4	23.9	37.5	71.6148	40.1043	30.316	7.41439	9.47151
						2011	6	12	163	27.3	16.8	22.05	34.5	53.622	45.0425	27.8008	6.49762	10.6211
						2011	6	13	164	26.7	17	21.85	28	55.0156	42.6921	27.4152	6.37533	10.8186
						2011	6	14	165	26.1	17.7	21.9	26	61.0925	41.0542	28.3301	6.59639	10.6594
						2011	6	15	166	28.7	18.8	23.75	22.5	60.3089	47.7646	30.3612	7.39874	13.1937
						2011	6	16	167	32.1	22.1	27.1	20.5	60.3144	48.2515	30.5169	8.03629	14.2791
						2011	6	17	168	31.7	23.5	27.6	22.5	64.2128	42.1236	29.4204	7.83379	12.3687
						2011	6	18	169	30.3	23.1	26.7	28	0	0	0	0	0.545222
						2011	6	19	170	31.4	21.8	26.6	52	0	0	0	0	0.414282
						2011	6	20	171	32.2	21.3	26.75	32.5	57.4727	50.1162	30.3595	7.93251	12.9617
						2011	6	21	172	33.3	21.6	27.45	33	56.756	53.1236	31.0617	8.2435	13.7561
						2011	6	22	173	33.8	21.7	27.75	28	55.6596	53.8785	30.9779	8.27578	14.802
						2011	6	23	174	33.1	20.7	26.9	23.5	56.3726	55.9216	31.7613	8.32672	15.9164
						2011	6	24	175	32.4	20.4	26.4	23.5	43.3524	41.6183	24.0284	6.22894	11.9113
						2011	6	25	176	35.2	23.2	29.2	22.5	53.9397	51.7821	29.8964	8.2411	15.3671
						2011	6	26	177	33.8	25.3	29.55	23.5	60.4135	41.0812	28.1814	7.8262	12.2375
						2011	6	27	178	31.8	23	27.4	23	62.1844	43.7778	29.515	7.82437	12.7329
						2011	6	28	179	31.6	24.3	27.95	24.5	63.9891	37.3696	27.6623	7.42244	10.8602
						2011	6	29	180	30.2	22.4	26.3	23	66.8028	41.685	29.8512	7.72091	11.9748
						2011	6	30	181	28.4	20.5	24.45	20	69.3831	43.8501	31.2024	7.73183	12.6092
						2011	7	1	182	32.7	20.5	26.6	20	55.9127	54.5708	31.2472	8.13695	16.0448
						2011	7	2	183	33.9	22.9	28.4	27.5	56.242	49.4929	29.8454	8.08699	13.8274
						2011	7	3	184	33.2	22.9	28.05	25	59.1841	48.7677	30.3909	8.17243	13.9413
						2011	7	4	185	35.4	24.8	30.1	24	57.4621	48.7279	29.9333	8.40926	14.4192
						2011	7	5	186	35.6	25.5	30.55	22	57.5275	46.4822	29.2521	8.29509	14.1384
						2011	7	6	187	36.5	25.9	31.2	20.5	54.7952	46.4663	28.544	8.20313	14.4492
						2011	7	7	188	36.5	28	32.25	17	63.2319	42.9977	29.4962	8.6584	14.0374
						2011	7	8	189	34	26.2	30.1	18.5	68.1821	42.5456	30.4675	8.55935	13.3906
						2011	7	9	190	37	26.9	31.95	21.5	59.2501	47.8741	30.128	8.79085	14.8318
						2011	7	10	191	36.5	27.7	32.1	25.5	61.5704	43.3456	29.2236	8.55268	12.9591
						2011	7	11	192	36.7	25.9	31.3	21.5	0	0	0	0	0.616325
						2011	7	12	193	34.5	27.6	31.05	23.5	60.9741	33.6577	25.6265	7.34214	10.3008
						2011	7	13	194	36.1	27.6	31.85	25	59.8588	40.704	27.9227	8.13101	12.2397
						2011	7	14	195	36.7	28.6	32.65	25	62.3901	40.4288	28.4105	8.40635	12.2571
						2011	7	15	196	36.5	28.6	32.55	21.5	0	0	0	0	0.624089
						2011	7	16	197	34.9	24.9	29.9	17.5	58.4277	46.7421	29.5623	8.27037	14.7611
						2011	7	17	198	35.1	24.3	29.7	20.5	42.6334	36.8352	22.4172	6.24515	11.3964
						2011	7	18	199	35.4	25.8	30.6	22.5	37.0574	28.46	18.3709	5.21487	8.8519
						2011	7	19	200	35.5	26.6	31.05	27.5	45.8817	32.6678	21.9005	6.27461	9.6004
						2011	7	20	201	33.8	22.7	28.25	26	51.1504	45.4216	27.2666	7.36425	12.9188
						2011	7	21	202	34.5	22.1	28.3	25.5	47.3895	47.0103	26.7001	7.21907	13.4301
						2011	7	22	203	35.9	27.5	31.7	23.5	44.665	30.0149	20.7123	6.01313	9.31332
						2011	7	23	204	35.3	24.8	30.05	21.5	55.2235	46.3877	28.6311	8.03505	14.1056
						2011	7	24	205	37.2	24	30.6	18.5	14.3471	15.1505	8.34009	2.36747	5.2004
						2011	7	25	206	36.5	27.6	32.05	19	58.0762	41.3503	27.7213	8.10488	13.2357
						2011	7	26	207	37.2	27.9	32.55	24	58.0964	43.2237	28.3472	8.37102	13.1876
						2011	7	27	208	37.3	28.7	33	25	61.8414	42.5469	29.0167	8.64531	12.9108
						2011	7	28	209	36.5	31.2	33.85	18	67.962	28.8159	25.0337	7.58338	9.67385
						2011	7	29	210	36.5	33.3	34.9	23	70.0543	17.9339	20.0507	6.19738	6.01601
						2011	7	30	211	36.5	33.3	34.9	19.5	87.5474	22.4121	25.0575	7.74492	7.62708
						2011	7	31	212	36.5	31.5	34	19	75.8262	30.3305	27.1284	8.2418	10.0621
						2011	8	1	213	37.2	31.3	34.25	20.5	68.5464	32.3539	26.6398	8.13241	10.5549
						2011	8	2	214	38.2	32.1	35.15	16	66.1546	32.2834	26.1424	8.11856	11.0962
						2011	8	3	215	36.3	29.7	33	17.5	69.4463	36.6676	28.5457	8.50497	12.0953
						2011	8	4	216	35.6	27	31.3	20.5	58.9743	40.5743	27.6715	7.96859	12.7091
						2011	8	5	217	33.8	26.5	30.15	19	66.1616	38.6384	28.6014	8.04348	12.165
						2011	8	6	218	37.2	25	31.1	20	49.5227	48.3342	27.6761	7.93746	15.0648
						2011	8	7	219	37.2	27.7	32.45	22	53.0837	40.3436	26.1784	7.71519	12.5944
						2011	8	8	220	37.2	26.2	31.7	20.5	50.9516	44.8374	27.038	7.8496	14.0364
						2011	8	9	221	37.2	27.1	32.15	24.5	50.9533	41.1703	25.9092	7.59026	12.4754
						2011	8	10	222	38.1	28.3	33.2	23.5	27.645	21.6737	13.8468	4.14179	6.99514
						2011	8	11	223	36.5	28.4	32.45	25	53.851	34.8954	24.522	7.22703	10.6413
						2011	8	12	224	32.1	23.9	28	21.5	59.2396	38.8612	27.1418	7.29075	11.632
						2011	8	13	225	31.2	23.5	27.35	22	57.0992	35.1731	25.351	6.71307	10.4441
						2011	8	14	226	31.1	23.5	27.3	20.5	59.5022	36.1773	26.2458	6.94231	10.8827
						2011	8	15	227	31.9	24	27.95	19.5	58.7423	37.1251	26.417	7.08832	11.358
						2011	8	16	228	32.8	25.6	29.2	18	58.3357	33.6013	25.045	6.90377	10.6509
						2011	8	17	229	35.4	25.1	30.25	19	50.0167	41.2138	25.6835	7.23794	12.9484
						2011	8	18	230	36	25.4	30.7	22.5	50.5288	42.8484	26.3216	7.48724	13.0349
						2011	8	19	231	36.4	24.7	30.55	19.5	46.743	43.7515	25.5817	7.25428	13.6839
						2011	8	20	232	31.2	24.2	27.7	25	56.0643	31.396	23.7332	6.33337	9.13909
						2011	8	21	233	34	25.8	29.9	24	53.1999	34.8991	24.3746	6.81906	10.4721
						2011	8	22	234	35.3	24.5	29.9	23	47.6309	41.1531	25.045	7.00659	12.3702
						2011	8	23	235	35.1	24.9	30	23	49.8057	40.6415	25.4507	7.13502	12.2375
						2011	8	24	236	35.5	24.3	29.9	24.5	48.4811	43.4391	25.9598	7.26253	12.8227
						2011	8	25	237	34.6	25.1	29.85	29	50.7675	38.5833	25.0362	6.99679	10.9093
						2011	8	26	238	34.5	24.9	29.7	23.5	49.0033	37.6345	24.293	6.76772	11.2797
						2011	8	27	239	34.4	24.3	29.35	22.5	49.1854	39.7418	25.0102	6.91619	11.9534
						2011	8	28	240	34.7	25.3	30	23.5	50.9831	38.3393	25.0098	7.01142	11.5185
						2011	8	29	241	34.2	23.6	28.9	22	43.7981	37.1408	22.8154	6.24903	11.2086
						2011	8	30	242	33.7	24.3	29	21	50.8397	38.2314	24.9394	6.84543	11.6515
						2011	8	31	243	34.2	26.1	30.15	18.5	52.5085	34.0255	23.9107	6.72433	10.8406
						2011	9	1	244	34.7	23	28.85	21.5	43.0785	40.3214	23.5762	6.45049	12.1719
						2011	9	2	245	32.8	25.3	29.05	22.5	53.5365	32.1219	23.4585	6.44582	9.74194
						2011	9	3	246	30.9	22.2	26.55	20.5	48.9559	34.0733	23.1039	6.00961	10.1824
						2011	9	4	247	31.3	23.7	27.5	23	51.6235	31.3871	22.7706	6.04979	9.30522
						2011	9	5	248	32.6	22.2	27.4	25.5	44.3884	36.9312	22.9037	6.07173	10.5531
						2011	9	6	249	31.5	21.7	26.6	20.5	48.326	37.8875	24.2055	6.30325	11.264
						2011	9	7	250	31.8	20.8	26.3	19	45.7125	40.227	24.2578	6.2742	12.0533
						2011	9	8	251	29.9	23.5	26.7	17.5	59.0545	30.2359	23.9036	6.23866	9.39536
						2011	9	9	252	30.3	22.5	26.4	20	49.2773	30.749	22.0199	5.70827	9.2738
						2011	9	10	253	32	22.9	27.45	25.5	45.4597	33.0947	21.9416	5.8231	9.52168
						2011	9	11	254	31.6	20.9	26.25	21.5	44.0577	37.7134	23.0586	5.95728	11.0491
						2011	9	12	255	32.5	20.8	26.65	19.5	41.7794	39.1055	22.8652	5.96094	11.7317
						2011	9	13	256	33.2	21.6	27.4	17.5	40.7259	37.7936	22.1932	5.88337	11.6995
						2011	9	14	257	33.8	23.9	28.85	17.5	42.6162	33.752	21.4542	5.86991	10.7042
						2011	9	15	258	30.6	23.4	27	17	48.6904	28.0457	20.904	5.49257	8.83683
						2011	9	16	259	32.7	24	28.35	20.5	45.1915	31.4533	21.3273	5.77266	9.66621
						2011	9	17	260	33.2	24.1	28.65	24	44.3528	32.2888	21.4073	5.83197	9.59327
						2011	9	18	261	33.3	23	28.15	35.5	41.469	34.1705	21.2942	5.73873	8.8522
						2011	9	19	262	29.6	23.6	26.6	38.5	54.5331	26.1759	21.3725	5.56554	6.52338
						2011	9	20	263	27.2	20.3	23.75	36.5	48.3947	26.7139	20.3396	4.95657	6.5282
						2011	9	21	264	29.7	20	24.85	32	41.9744	32.5722	20.9166	5.23212	8.42364
						2011	9	22	265	29.9	23.3	26.6	52.5	50.118	26.4623	20.6009	5.36459	5.65967
						2011	9	23	266	28.8	23	25.9	52.5	32.6566	15.1527	12.5836	3.22519	3.38488
						2011	9	24	267	26.1	19.8	22.95	42.5	44.4059	22.3806	17.8333	4.26213	5.07903
						2011	9	25	268	27	18.1	22.55	31.5	39.2941	27.9774	18.7561	4.43868	7.07684
						2011	9	26	269	25.2	17.6	21.4	31	35.3734	21.5071	15.6029	3.58722	5.46794
						2011	9	27	270	25.2	16	20.6	36.5	33.8348	24.9024	16.4202	3.69808	5.77576
						2011	9	28	271	26.1	17.6	21.85	44.5	45.0783	30.6532	21.028	4.88999	6.49152
						2011	9	29	272	27.4	16.5	21.95	42	35.4432	30.9065	18.7226	4.36487	6.77089
						2011	9	30	273	22.2	12.9	17.55	46.5	31.7551	23.6258	15.4944	3.21242	4.51312
						2011	10	1	274	20.6	11.4	16	43.5	34.9693	25.7374	16.9707	3.36423	4.86582
						2011	10	2	275	21.2	11	16.1	34.5	40.1543	32.7659	20.5188	4.07962	6.83238
						2011	10	3	276	21.5	14.4	17.95	30	46.7851	26.5739	19.946	4.18216	6.22373
						2011	10	4	277	21.9	11.6	16.75	22.5	39.5643	32.601	20.3162	4.11678	7.90234
						2011	10	5	278	23.8	14.5	19.15	26.5	41.5564	30.918	20.2768	4.39422	7.66429
						2011	10	6	279	26.5	16.6	21.55	27	38.5941	30.5665	19.4294	4.48406	7.93006
						2011	10	7	280	25.4	18.7	22.05	22	45.2932	24.2772	18.7582	4.38417	6.81042
						2011	10	8	281	23.9	17.4	20.65	26	43.8857	22.8206	17.9019	4.03705	6.0067
						2011	10	9	282	23.8	17.5	20.65	28	44.0827	22.2177	17.7035	3.9923	5.73661
						2011	10	10	283	26.6	18.5	22.55	22	37.8254	24.5109	17.2245	4.07622	6.93301
						2011	10	11	284	30	20.5	25.25	21	19.486	14.8094	9.60958	2.42631	4.64798
						2011	10	12	285	28.2	21.5	24.85	18	37.4318	20.0634	15.5024	3.8778	6.24027
						2011	10	13	286	21.8	12.8	17.3	50.5	37.3149	26.8667	17.9111	3.68722	4.80789
						2011	10	14	287	22	15.3	18.65	56	0	0	0	0	0.359089
						2011	10	15	288	24.3	16.8	20.55	39	0	0	0	0	0.433378
						2011	10	16	289	24.5	19.2	21.85	40	0	0	0	0	0.43905
						2011	10	17	290	25	17.1	21.05	33.5	0	0	0	0	0.467491
						2011	10	18	291	20.7	16.2	18.45	31.5	0	0	0	0	0.451808
						2011	10	19	292	16.5	6.7	11.6	32	20.1919	15.8304	10.1137	1.74392	3.04559
						2011	10	20	293	13.2	5.9	9.55	43.5	42.9116	25.0604	18.5505	2.97564	3.5781
						2011	10	21	294	17.4	7.6	12.5	43	36.1097	28.31	18.0866	3.21416	4.712
						2011	10	22	295	20.4	12.5	16.45	41.5	36.0258	22.7683	16.2012	3.25443	4.52012
						2011	10	23	296	21	14.6	17.8	35.5	42.716	21.8706	17.2902	3.61009	4.86591
						2011	10	24	297	20.4	13.7	17.05	31	31.4811	16.8739	13.0379	2.66488	3.97628
						2011	10	25	298	21.4	16.4	18.9	29.5	24.5085	9.80339	8.76842	1.88736	2.65754
						2011	10	26	299	20	13.7	16.85	30.5	28.7118	14.4708	11.5306	2.34327	3.47262
						2011	10	27	300	17	10.6	13.8	29	28.6646	14.6763	11.6026	2.15036	3.23763
						2011	10	28	301	14.4	8.6	11.5	32	18.8351	8.73948	7.25775	1.2472	1.8315
						2011	10	29	302	14.4	9	11.7	32	24.7905	10.7095	9.21726	1.59475	2.18582
						2011	10	30	303	15.5	9.2	12.35	34.5	32.9322	16.5978	13.2255	2.33866	3.1952
						2011	10	31	304	13.7	6.6	10.15	30	19.5859	11.1248	8.35013	1.36881	2.12567
						2011	11	1	305	14.6	7.9	11.25	62	35.5989	19.081	14.7433	2.51193	2.81272
						2011	11	2	306	15	9.4	12.2	79.5	36.5123	16.3575	13.8246	2.43244	2.56502
						2011	11	3	307	11.8	5	8.4	74	6.39146	3.47695	2.6667	0.409773	0.619502
						2011	11	4	308	10.8	6.9	8.85	76	13.1729	4.10994	4.1623	0.650576	0.713188
						2011	11	5	309	11.4	6.9	9.15	75	26.1315	9.40734	8.86932	1.4019	1.3504
						2011	11	6	310	12.6	6.2	9.4	75	33.0939	16.9441	13.3955	2.13695	2.27317
						2011	11	7	311	10.7	5.7	8.2	66.5	37.7399	15.096	13.5022	2.05896	1.88305
						2011	11	8	312	9.8	1.1	5.45	61	32.9845	22.9572	15.5664	2.12266	2.0693
						2011	11	9	313	12.2	2.4	7.3	66.5	25.1623	19.7273	12.6033	1.85535	2.21401
						2011	11	10	314	9.7	3.1	6.4	69	35.6302	18.8128	14.6457	2.07871	1.9379
						2011	11	11	315	10	3.5	6.75	62	16.3868	8.52116	6.68455	0.962479	1.02087
						2011	11	12	316	7.4	1.4	4.4	54.5	22.8389	10.9627	8.95097	1.16544	0.917723
						2011	11	13	317	6.5	-0.7	2.9	52.5	35.2222	20.288	15.1218	1.83587	1.1239
						2011	11	14	318	9.9	3	6.45	73	16.2495	8.9697	6.82942	0.971322	1.03095
						2011	11	15	319	13.3	5	9.15	67.5	11.5004	7.63625	5.30116	0.837911	1.14238
						2011	11	16	320	12.2	7.1	9.65	58	32.4943	13.2577	11.7412	1.89026	1.86258
						2011	11	17	321	11.5	5.6	8.55	55.5	24.6584	11.6388	9.58321	1.48101	1.54514
						2011	11	18	322	8.2	5.4	6.8	71.5	13.6261	3.05225	3.64813	0.526349	0.497241
						2011	11	19	323	9.8	6.4	8.1	67.5	10.5588	2.87201	3.11513	0.473199	0.539377
						2011	11	20	324	12	5.7	8.85	73.5	26.9728	13.5943	10.8322	1.6931	1.80419
						2011	11	21	325	12	6.5	9.25	79.5	24.303	10.6933	9.11929	1.44676	1.51159
						2011	11	22	326	11.8	6.5	9.15	85	32.6676	13.851	12.033	1.90196	1.87233
						2011	11	23	327	8.5	3.5	6	68.5	34.6679	13.8671	12.4032	1.73132	1.41335
						2011	11	24	328	8.1	1.6	4.85	70	32.6885	16.998	13.3343	1.77136	1.44578
						2011	11	25	329	6	-1.7	2.15	64	29.4667	18.1515	13.0827	1.53076	0.786645
						2011	11	26	330	7.4	0.6	4	68.5	31.7977	17.298	13.2669	1.69627	1.26532
						2011	11	27	331	7.4	1.8	4.6	50	33.8185	15.1507	12.8047	1.68223	1.25435
						2011	11	28	332	8.3	1.9	5.1	65	28.5177	14.601	11.5431	1.55034	1.31286
						2011	11	29	333	7.5	2.1	4.8	93.5	32.9121	14.218	12.2369	1.62199	1.22557
						2011	11	30	334	7.7	-0.1	3.8	79	28.8434	17.9983	12.8888	1.63281	1.25872
						2011	12	1	335	7.1	-0.5	3.3	83	29.1958	17.751	12.878	1.59367	1.10915
						2011	12	2	336	8	2.3	5.15	59	32.1253	14.6491	12.2717	1.65179	1.32625
						2011	12	3	337	7.1	0.8	3.95	46	31.3944	15.8228	12.6079	1.60831	1.22362
						2011	12	4	338	10.4	3.1	6.75	74	29.316	17.1206	12.6732	1.82476	1.84819
						2011	12	5	339	11	4.4	7.7	96.5	29.7029	15.6831	12.2093	1.82599	1.86892
						2011	12	6	340	13.1	6.6	9.85	90	29.9346	15.566	12.211	1.98022	2.16952
						2011	12	7	341	12	5	8.5	89.5	28.8823	16.1741	12.2265	1.88593	2.04791
						2011	12	8	342	9.8	3.8	6.8	85	22.8175	10.9524	8.94259	1.29023	1.26116
						2011	12	9	343	6.2	2.2	4.2	83.5	6.92818	2.21702	2.21702	0.286062	0.29207
						2011	12	10	344	5.8	-0.3	2.75	94.5	14.4574	7.05523	5.71316	0.688583	0.439229
						2011	12	11	345	6.7	1.3	4	94	31.9718	13.8118	11.8873	1.51988	1.0378
						2011	12	12	346	7.2	1.1	4.15	79.5	28.8153	14.0619	11.387	1.46592	1.08508
						2011	12	13	347	8.8	2.3	5.55	78	29.0642	15.1134	11.8559	1.62364	1.44031
						2011	12	14	348	11.3	6.3	8.8	75.5	26.773	10.7092	9.5786	1.49435	1.46707
						2011	12	15	349	11.5	5.8	8.65	65	20.784	9.47752	7.93939	1.23163	1.31156
						2011	12	16	350	11.2	5.8	8.5	57.5	28.3648	12.2536	10.5462	1.62675	1.60831
						2011	12	17	351	5.8	1.8	3.8	62	7.86763	2.51764	2.51764	0.318945	0.288713
						2011	12	18	352	8.9	1.9	5.4	63.5	24.7469	13.8583	10.4759	1.42543	1.3087
						2011	12	19	353	7.2	1.2	4.2	62	27.4989	13.1995	10.7773	1.3906	1.03682
						2011	12	20	354	14.9	6.3	10.6	65.5	24.3673	16.7647	11.4334	1.90442	2.42018
						2011	12	21	355	11.1	7.4	9.25	63	22.1808	6.5655	6.82648	1.08301	1.02349
						2011	12	22	356	10.5	8	9.25	54.5	21.6117	4.32235	5.46738	0.867391	0.758244
						2011	12	23	357	11.2	5.6	8.4	63	21.2563	9.52282	8.04825	1.23672	1.2923
						2011	12	24	358	6.9	5.2	6.05	88.5	9.38497	1.27636	1.95784	0.273863	0.299934
						2011	12	25	359	7.7	3.1	5.4	63.5	10.6492	3.91892	3.65441	0.497249	0.493085
						2011	12	26	360	6.8	2.5	4.65	62	19.1731	6.59555	6.36131	0.837589	0.637161
						2011	12	27	361	7.1	2.1	4.6	65.5	33.1804	13.2722	11.871	1.55956	1.11768
						2011	12	28	362	8.2	2	5.1	63	30.1216	14.9403	12.0004	1.61175	1.33955
						2011	12	29	363	9.6	3.8	6.7	54.5	30.5258	14.164	11.7625	1.69019	1.55574
						2011	12	30	364	8.3	3.1	5.7	63	30.2271	12.5745	11.0286	1.52004	1.25179
						2011	12	31	365	5.9	2.1	4	88.5	14.7976	4.49847	4.61533	0.590102	0.429984
																	1322.56	1939.54
																	ETo-HS	ETo-TURC (Ousman Couly (2016)

## Sheet: 2012
	MARDİN					year	month	day	DOY	Tmax	Tmin	Tmean	Rhmean	Ra	Rs=0.16(Tmax-Tmin)^0.5*Ra	Rs=from meteorological station	ETo-HS	ETo-TURC (Ousman Couly (2016)
	DOY	246					#	#		°C	°C	°C	%	MJ m-2 day-1*(0.408 mm day-1)
	φ (-)	37.31	0.651182			2012	1	1	1	6.5	2.2	4.35	75.5	20.5196	7.05875	6.80806	0.884434	0.637576
	tan(φ)		0.762072			2012	1	2	2	5.9	4.2	5.05	79	34.9528	4.75358	7.29166	0.977194	0.534345
	sin(φ)		0.606127			2012	1	3	3	7.1	1.8	4.45	78.5	21.637	9.17411	7.96995	1.04005	0.798912
	cos(φ)		0.795368			2012	1	4	4	10.4	2	6.2	72	15.4668	10.3937	7.17233	1.00958	1.13178
	dr	0.984766		(1+0.033*cos(2*3.14/365*DOY))		2012	1	5	5	10.3	4	7.15	95	5.50486	2.77445	2.21074	0.323501	0.486775
	δ	0.120494		(0.409*sin(2*3.14/365*DOY-1.39))		2012	1	6	6	6	1.6	3.8	78.5	25.4874	8.97155	8.55404	1.08366	0.693112
	tan(δ)	0.121081				2012	1	7	7	9.9	2.1	6	86	11.3001	7.05127	5.04952	0.704848	0.809656
	sin(δ)	0.120203				2012	1	8	8	7.1	3.6	5.35	67.5	14.0577	3.93616	4.20793	0.571331	0.491125
	cos(δ)	0.992749				2012	1	9	9	5.9	2.2	4.05	60.5	24.8146	7.34512	7.63709	0.978695	0.621826
	X	0.991486				2012	1	10	10	8.6	3	5.8	47.5	9.35533	4.19119	3.5422	0.49029	0.562352		-
	ωs (eq. 25)	1.49187		(acos{(-1*tan(-0.35)*tan(0.409*sin(2*3.14/365*DOY-1.39))))		2012	1	11	11	7.5	2.8	5.15	58.5	3.72986	1.40243	1.29378	0.174145	0.276708
	sin ωs	0.996887				2012	1	12	12	5.5	2	3.75	67	17.5407	4.91139	5.2505	0.663614	0.434086
	sin φ*sin δ	-0.0728584		(sin(0.35)*sin(0.409*sin(2*3.14/365*DOY-1.39)))		2012	1	13	13	4.9	1	2.95	62.5	2.88211	0.899217	0.910672	0.110828	0.152292
	cos φ*cos δ	0.789601		(cos(0.35)*cos(0.409*sin(2*3.14/365*DOY-1.39))		2012	1	14	14	3.9	2	2.95	56.5	31.6097	4.80467	6.97135	0.848405	0.351264
	Gsc	0.082				2012	1	15	15	4.3	1.9	3.1	75	39.0709	7.50161	9.68453	1.18712	0.509256
						2012	1	16	16	7.8	2.8	5.3	84.5	30.0358	12.0143	10.7459	1.45588	1.14155
	Ra	25.1244				2012	1	17	17	5.1	1.6	3.35	69	35.0394	9.81103	10.4884	1.30104	0.673527
						2012	1	18	18	4.1	-0.2	1.95	52.5	6.43604	2.214	2.13537	0.247348	0.153497
						2012	1	19	19	1	-2.7	-0.85	48.5	15.101	4.46989	4.64757	0.462023	-0.124775
						2012	1	20	20	2.9	-0.7	1.1	46	6.16509	1.77555	1.87159	0.207463	0.0865512
						2012	1	21	21	2.6	-2.1	0.25	46.5	30.2372	11.3692	10.4884	1.11034	0.0718191
						2012	1	22	22	3	-2.3	0.35	54.5	13.5551	5.74737	4.993	0.531503	0.0553977
						2012	1	23	23	3.3	0.6	1.95	40	17.2476	3.72549	4.53452	0.525251	0.237031
						2012	1	24	24	3.1	0.1	1.6	52.5	8.92914	2.14299	2.47452	0.281553	0.12648
						2012	1	25	25	2.3	-0.9	0.7	49	11.3666	2.90984	3.2533	0.352991	0.0700933
						2012	1	26	26	3.3	-0.6	1.35	51.5	26.7141	8.33481	8.44099	0.948048	0.266837
						2012	1	27	27	4.9	0.9	2.9	48	31.2062	9.98599	9.98599	1.21235	0.623827
						2012	1	28	28	6	0.9	3.45	71.5	18.7373	7.64483	6.77038	0.843801	0.564304
						2012	1	29	29	4.8	-0.8	2	70	30.6205	13.718	11.5938	1.34635	0.576526
						2012	1	30	30	5.6	0.2	2.9	76.5	31.9763	13.8138	11.889	1.44339	0.798742
						2012	1	31	31	3.1	-0.9	1.1	85	30.9707	9.91063	9.91063	1.09858	0.254175
						2012	2	1	32	4	-1.9	1.05	75	27.731	13.089	10.7773	1.19149	0.307836
						2012	2	2	33	0.6	-5.1	-2.25	58.5	7.62877	3.47872	2.91415	0.265773	-0.304642
						2012	2	3	34	4.5	-2.4	1.05	58.5	5.26008	2.90356	2.21074	0.244408	0.101271
						2012	2	4	35	6.3	-0.3	3	68.5	29.4584	15.554	12.1088	1.47718	0.911609
						2012	2	5	36	8.8	2.2	5.5	45.5	10.0232	5.29225	4.12001	0.563018	0.653457
						2012	2	6	37	9.7	2.9	6.3	49	5.65989	3.07898	2.36147	0.333785	0.480715
						2012	2	7	38	5.5	-0.2	2.65	52	11.5747	5.27806	4.42147	0.530308	0.342938
						2012	2	8	39	4.2	1.4	2.8	59	11.4007	2.55376	3.05232	0.368779	0.226448
						2012	2	9	40	5	2.2	3.6	86	21.5347	4.82376	5.7655	0.723634	0.414826
						2012	2	10	41	5.8	1.1	3.45	80.5	16.5128	6.2088	5.72782	0.713865	0.481061
						2012	2	11	42	3.8	-2.6	0.6	80	23.2742	11.9164	9.42075	1.01665	0.167
						2012	2	12	43	5.8	-2.6	1.6	78	13.4624	9.0467	6.24282	0.710314	0.332759
						2012	2	13	44	9.4	2.1	5.75	79	4.70715	2.74897	2.03488	0.281059	0.415685
						2012	2	14	45	11.6	5.2	8.4	73.5	20.4813	10.4864	8.29026	1.27391	1.39953
						2012	2	15	46	10.8	6.2	8.5	72.5	29.7954	10.9647	10.2247	1.57715	1.4638
						2012	2	16	47	6.4	2.1	4.25	90.5	42.8186	14.7296	14.2065	1.83723	1.15116
						2012	2	17	48	3.6	0.8	2.2	91.5	44.8052	10.0364	11.9958	1.4071	0.480825
						2012	2	18	49	1.6	-2.2	-0.3	81.5	14.4177	4.38298	4.49684	0.461544	-0.0409515
						2012	2	19	50	3.4	-3.6	-0.1	72	27.6993	15.5116	11.7257	1.21725	-0.0366209
						2012	2	20	51	2.2	-4	-0.9	86	23.3314	11.5724	9.29514	0.92132	-0.27034
						2012	2	21	52	4.7	-3	0.85	85	18.8988	11.6417	8.39075	0.917799	0.228284
						2012	2	22	53	4.1	-3.2	0.45	56.5	34.3447	20.0573	14.8471	1.58918	0.199971
						2012	2	23	54	6.2	-1.7	2.25	55	33.5734	21.2184	15.0983	1.77546	0.942469
						2012	2	24	55	7.8	0.8	4.3	60.5	35.5181	19.8901	15.0355	1.94885	1.51811
						2012	2	25	56	7.7	0.5	4.1	75.5	32.0663	18.4702	13.7669	1.76826	1.36817
						2012	2	26	57	8	-0.3	3.85	67.5	27.9584	18.5644	12.8876	1.63643	1.30775
						2012	2	27	58	8.2	4.1	6.15	55.5	39.198	12.8569	12.6992	1.78381	1.34734
						2012	2	28	59	11.7	6.8	9.25	70	30.7841	12.0674	10.9029	1.72973	1.67407
						2012	3	1	60	8.2	2.7	5.45	62	35.7515	15.7307	13.4151	1.82931	1.47227
						2012	3	2	61	-0.6	-2.7	-1.65	35.5	56.6123	9.51087	13.1262	1.24331	-0.536554
						2012	3	3	62	0.7	-3.1	-1.2	35.5	39.709	12.0715	12.3851	1.20581	-0.460822
						2012	3	4	63	3.8	-3	0.4	38	23.5427	12.8072	9.8227	1.0485	0.140515
						2012	3	5	64	1.4	-3.6	-1.1	39	36.1623	14.4649	12.9378	1.2672	-0.469953
						2012	3	6	65	-2.1	-3.1	-2.6	36	92.7944	7.42355	14.8471	1.32359	-0.742057
						2012	3	7	66	2.4	0	1.2	40.5	56.7566	10.8973	14.0683	1.5677	0.3387
						2012	3	8	67	5.7	-1.4	2.15	41.5	4.77299	2.71106	2.03488	0.238095	0.20924
						2012	3	9	68	7.9	0.7	4.3	66	16.8816	9.72381	7.2477	0.939421	0.815948
						2012	3	10	69	11.4	3	7.2	69.5	23.5388	15.8181	10.9155	1.60049	1.80049
						2012	3	11	70	5.6	-0.9	2.35	58.5	33.6461	17.496	13.725	1.62202	0.822386
						2012	3	12	71	6	-3.7	1.15	63	28.1308	21.8295	14.0181	1.55799	0.528007
						2012	3	13	72	8.3	1.4	4.85	65	35.4458	19.5661	14.8973	1.979	1.6403
						2012	3	14	73	17	4.4	10.7	49.5	21.1214	21.2904	11.9958	2.00512	3.03917
						2012	3	15	74	12.6	6.2	9.4	58.5	25.6948	13.1557	10.4005	1.65917	1.82074
						2012	3	16	75	7.7	1.9	4.8	65.5	34.4234	15.9725	13.2644	1.75819	1.35742
						2012	3	17	76	4.8	-0.8	2	67.5	44.8194	20.0791	16.9699	1.97066	0.808519
						2012	3	18	77	2.1	-4.8	-1.35	77	19.6058	10.8224	8.24002	0.794991	-0.395885
						2012	3	19	78	8.5	-4.1	2.2	70	6.36959	6.42055	3.61757	0.424341	0.337453
						2012	3	20	79	12.2	2.4	7.3	56	33.0527	25.9133	16.5554	2.43714	2.84177
						2012	3	21	80	8.4	6.5	7.45	71	46.8165	7.11611	10.3251	1.52906	0.947061
						2012	3	22	81	15.8	6.2	11	68.5	34.206	26.2702	16.9573	2.8643	3.71955
						2012	3	23	82	15.3	6.1	10.7	52	34.3723	25.298	16.681	2.78827	3.53486
						2012	3	24	83	13.5	4.1	8.8	44	26.8862	20.2184	13.189	2.05761	2.77621
						2012	3	25	84	15.3	4	9.65	50.5	27.3244	24.7013	14.6964	2.36603	3.25136
						2012	3	26	85	14.5	7.4	10.95	80	28.6379	16.2663	12.2093	2.05872	2.40118
						2012	3	27	86	13.5	9.1	11.3	69.5	42.6661	15.0185	14.3195	2.44394	2.27874
						2012	3	28	87	10.3	4.7	7.5	63	46.08	20.6438	17.4472	2.5889	2.34916
						2012	3	29	88	10	1	5.5	68.5	35.9559	25.8882	17.2588	2.35849	2.32697
						2012	3	30	89	9.2	4.5	6.85	65	52.4353	19.7157	18.1883	2.62953	2.11919
						2012	3	31	90	11.1	5.2	8.15	64.5	37.1363	17.5283	14.4326	2.19659	2.14107
						2012	4	1	91	10	2.1	6.05	61	20.7529	13.1159	9.33282	1.30548	1.3548
						2012	4	2	92	14.8	6.6	10.7	44.5	8.19726	5.3774	3.75574	0.627781	1.03951
						2012	4	3	93	15.8	10.2	13	49	31.5825	14.149	11.9581	2.16013	2.37064
						2012	4	4	94	18.4	7.2	12.8	46	25.8979	23.2045	13.8673	2.48876	3.81669
						2012	4	5	95	12.9	9.9	11.4	39	33.9036	8.13685	9.39563	1.60908	1.58413
						2012	4	6	96	19.4	11	15.2	43	39.3848	26.4666	18.2637	3.53485	4.90115
						2012	4	7	97	21	14.1	17.55	44	37.0597	20.4569	15.5756	3.22926	4.09158
						2012	4	8	98	22.2	15.1	18.65	53	43.5167	24.7175	18.5526	3.96616	4.60586
						2012	4	9	99	20.7	14	17.35	73.5	35.5463	19.0528	14.7215	3.03491	3.5152
						2012	4	10	100	23.1	15.4	19.25	53.5	39.0142	24.0328	17.3216	3.76396	4.55146
						2012	4	11	101	19.8	11.4	15.6	56.5	43.773	29.4154	20.2986	3.97631	4.97909
						2012	4	12	102	17.4	12.3	14.85	51.5	55.4472	22.6225	20.0348	3.83651	3.81118
						2012	4	13	103	16.2	9.6	12.9	39	33.1254	17.4902	13.6161	2.45166	3.24752
						2012	4	14	104	20	10.9	15.45	34.5	28.7051	20.8973	13.8548	2.70184	4.41631
						2012	4	15	105	22.8	11.4	17.1	48	14.2416	12.9883	7.69361	1.57479	2.56118
						2012	4	16	106	18.7	14.2	16.45	54.5	46.2232	16.6404	15.6887	3.15149	3.03706
						2012	4	17	107	16.8	10.3	13.55	52.5	40.8311	21.2322	16.6559	3.06248	3.43134
						2012	4	18	108	17.4	8.4	12.9	51	34.3334	24.72	16.48	2.96732	3.84277
						2012	4	19	109	22.2	11.5	16.85	64.5	39.0001	33.3841	20.4116	4.1481	5.81786
						2012	4	20	110	17.5	10	13.75	62.5	38.8	23.28	17.0013	3.14594	3.76138
						2012	4	21	111	19.6	9.4	14.5	62	39.2563	32.0331	20.0599	3.80014	5.19944
						2012	4	22	112	20.4	12.7	16.55	39.5	48.9729	30.1673	21.7431	4.38042	6.03235
						2012	4	23	113	20.4	13.3	16.85	37.5	44.2532	25.1358	18.8666	3.83412	5.26247
						2012	4	24	114	22.1	13.7	17.9	35.5	33.5069	22.5166	15.538	3.25335	5.00991
						2012	4	25	115	22.8	15	18.9	32.5	15.2636	9.52448	6.82062	1.46811	2.50919
						2012	4	26	116	24.6	17.1	20.85	30.5	52.9756	31.7853	23.2127	5.26191	7.80885
						2012	4	27	117	25.2	17.4	21.3	30.5	50.8505	31.7307	22.7228	5.21084	7.8658
						2012	4	28	118	25.2	17.1	21.15	36	37.5698	24.3452	17.1081	3.9082	5.75345
						2012	4	29	119	25.6	15.5	20.55	49.5	33.7191	27.245	17.1458	3.85647	5.29434
						2012	4	30	120	26.8	17.1	21.95	47	40.6082	31.512	20.2358	4.71764	6.45314
						2012	5	1	121	22.3	17.5	19.9	35.5	58.9095	22.6213	20.6503	4.56599	5.27282
						2012	5	2	122	26.7	17.8	22.25	36.5	35.1047	24.9945	16.7564	3.93596	5.9824
						2012	5	3	123	27.7	17.5	22.6	23	39.5267	32.2538	20.1981	4.78586	8.86755
						2012	5	4	124	24	12.9	18.45	21.5	42.9566	38.1454	22.8987	4.86841	9.68074
						2012	5	5	125	18.5	12.6	15.55	27	59.3405	28.0087	23.062	4.51087	6.30977
						2012	5	6	126	21.8	13.9	17.85	40.5	44.0755	27.8557	19.8213	4.14437	5.72887
						2012	5	7	127	22.5	14	18.25	57.5	37.5907	25.5617	17.5352	3.70752	4.70494
						2012	5	8	128	22.7	12.7	17.7	51	41.8564	33.4851	21.1778	4.40939	5.96944
						2012	5	9	129	21.9	13.8	17.85	67.5	50.562	32.7642	23.0243	4.81409	5.8711
						2012	5	10	130	25.9	15.2	20.55	50.5	43.7521	37.4518	22.8987	5.15044	7.08583
						2012	5	11	131	25.3	15	20.15	50	44.3734	36.5637	22.7857	5.07156	6.86914
						2012	5	12	132	27.8	17.8	22.8	45	45.7127	36.5701	23.129	5.50745	7.74518
						2012	5	13	133	23.7	19.4	21.55	40	70.1907	24.1456	23.2881	5.37461	5.4803
						2012	5	14	134	25.7	18.1	21.9	35.5	54.2776	33.0008	23.9413	5.5745	7.79347
						2012	5	15	135	23.6	17.1	20.35	29	55.4268	28.822	22.6098	5.05894	7.17144
						2012	5	16	136	22.3	12.1	17.2	27.5	44.7707	36.5329	22.8778	4.69623	8.45128
						2012	5	17	137	25.4	16.8	21.1	25	42.0295	28.9163	19.7208	4.49926	7.62453
						2012	5	18	138	24.8	16.9	20.85	25	47.6926	30.1418	21.4479	4.86186	7.88657
						2012	5	19	139	26.4	18.3	22.35	32.5	47.5553	30.8158	21.6552	5.09935	7.63012
						2012	5	20	140	28.4	19.3	23.85	46	45.3868	33.0416	21.9064	5.35123	7.06791
						2012	5	21	141	28.5	19.8	24.15	37	47.4831	33.0483	22.4088	5.51339	7.96723
						2012	5	22	142	22.4	13.7	18.05	37	45.9394	31.9738	21.6803	4.5585	6.83819
						2012	5	23	143	24.4	12.8	18.6	30.5	36.7882	34.1394	20.0474	4.27983	7.94917
						2012	5	24	144	25.3	15.4	20.35	38	44.7121	35.4119	22.5093	5.03645	7.83982
						2012	5	25	145	25.6	16.2	20.9	38	45.4761	34.198	22.3083	5.06345	7.67172
						2012	5	26	146	21.7	11.6	16.65	48	42.1921	34.0912	21.4542	4.3348	6.06904
						2012	5	27	147	22.1	13.6	17.85	43.5	49.2772	33.5085	22.9866	4.80621	6.55329
						2012	5	28	148	25	14.9	19.95	40.5	40.0183	32.3348	20.3488	4.50531	6.91827
						2012	5	29	149	25.3	19.7	22.5	30	59.6486	26.7226	22.5847	5.3381	6.89032
						2012	5	30	150	29	18.7	23.85	43	41.2179	33.9635	21.1653	5.1702	7.54744
						2012	5	31	151	30	21.4	25.7	38	48.6954	33.5024	22.8485	5.82927	8.16157
						2012	6	1	152	25.6	17.5	21.55	39	40.4937	26.2399	18.4395	4.25562	5.99176
						2012	6	2	153	24.8	16.9	20.85	23	44.718	28.2618	20.1102	4.55862	7.58291
						2012	6	3	154	28	17.8	22.9	47.5	37.7322	30.7895	19.2811	4.60251	6.37857
						2012	6	4	155	31.2	18.2	24.7	42.5	38.0169	39.5376	21.9315	5.4667	8.889
						2012	6	5	156	33	22.4	27.7	39.5	42.4871	36.0291	22.1325	5.90622	8.81564
						2012	6	6	157	31.8	24	27.9	31	49.4169	30.8362	22.0822	5.91871	8.43999
						2012	6	7	158	32.1	23.5	27.8	34	53.4337	36.7624	25.0718	6.70529	9.61128
						2012	6	8	159	27.9	19.3	23.6	45.5	51.6669	35.5468	24.2427	5.8864	7.59202
						2012	6	9	160	28.6	17.9	23.25	48.5	46.5601	39.8555	24.3683	5.86688	8.07321
						2012	6	10	161	36.4	23.7	30.05	42.5	42.4506	43.1298	24.205	6.79291	10.3525
						2012	6	11	162	36.4	26.1	31.25	42	47.6268	39.2445	24.4563	7.03554	9.64738
						2012	6	12	163	34	26	30	34	54.2494	34.7196	24.5505	6.88265	9.34614
						2012	6	13	164	34.5	26.3	30.4	30.5	51.7332	33.937	23.7026	6.70056	9.56163
						2012	6	14	165	34.8	22.9	28.85	26.5	42.2385	40.2111	23.3132	6.37855	11.524
						2012	6	15	166	36.5	25.2	30.85	25	45.4239	41.0632	24.4311	6.97099	12.2156
						2012	6	16	167	37.7	29.6	33.65	35	52.2998	33.8903	23.8157	7.18648	9.36805
						2012	6	17	168	37.1	26.1	31.6	37	43.3171	38.119	22.9866	6.65994	10.0223
						2012	6	18	169	35.6	23.4	29.5	46	40.8619	39.8812	22.8359	6.33501	9.11819
						2012	6	19	170	29.5	18.3	23.9	39	41.9902	37.6232	22.4842	5.49897	8.7525
						2012	6	20	171	32	19.2	25.6	36.5	39.7171	40.6703	22.7354	5.78709	9.97023
						2012	6	21	172	33.3	24.2	28.75	37.5	46.636	33.951	22.5093	6.1454	8.65316
						2012	6	22	173	35.1	25.4	30.25	33.5	45.4731	35.2872	22.66	6.3859	9.57178
						2012	6	23	174	35.1	25.2	30.15	31.5	43.4645	34.4239	21.8813	6.1536	9.55641
						2012	6	24	175	32.1	24	28.05	34	49.5276	32.0939	22.5533	6.06481	8.48288
						2012	6	25	176	31.6	23.7	27.65	41	51.3935	32.4807	23.1122	6.1609	7.84107
						2012	6	26	177	32.8	24.4	28.6	34.5	49.1904	33.056	22.8108	6.20763	8.72941
						2012	6	27	178	33.3	0.6	16.95	39	24.6293	64.4304	22.5344	4.59271	12.6591
						2012	6	28	179	34.6	24.4	29.5	34.5	44.6887	36.466	22.8359	6.33501	9.67796
						2012	6	29	180	34.1	23.2	28.65	25.5	38.9973	34.0057	20.6	5.61205	9.91496
						2012	6	30	181	31.1	19.6	25.35	30	39.3091	36.1644	21.3286	5.39772	9.57903
						2012	7	1	182	30.8	19.5	25.15	33	39.2584	35.4896	21.115	5.31892	9.06959
						2012	7	2	183	28.7	18.4	23.55	38	39.9459	32.9154	20.5121	4.97455	7.76567
						2012	7	3	184	29.1	17	23.05	38.5	32.7024	31.6559	18.2009	4.36066	7.37835
						2012	7	4	185	31.1	21.2	26.15	26.5	43.0653	34.1077	21.6803	5.58846	9.52485
						2012	7	5	186	28.2	20.4	24.3	22	51.2722	31.9938	22.9113	5.65717	9.14644
						2012	7	6	187	30.7	20.1	25.4	44	42.6559	36.1722	22.2204	5.62994	8.09654
						2012	7	7	188	32.7	21.1	26.9	37.5	38.4478	35.6795	20.9517	5.49283	8.85926
						2012	7	8	189	34.8	23.3	29.05	30	43.8465	40.3388	23.7905	6.53705	11.1524
						2012	7	9	190	34.2	23.5	28.85	21.5	43.9921	37.6572	23.0243	6.2995	11.4073
						2012	7	10	191	33.2	24.7	28.95	28.5	49.0618	33.362	22.8861	6.27512	9.4627
						2012	7	11	192	32.3	22.5	27.4	34.5	45.3408	35.5472	22.7103	6.02045	9.20942
						2012	7	12	193	34.2	24	29.1	22.5	47.7368	38.9532	24.3935	6.70987	11.694
						2012	7	13	194	36.3	26.7	31.5	19	46.8749	35.9999	23.2378	6.7191	11.5412
						2012	7	14	195	37.8	27	32.4	22.5	43.0713	37.2136	22.6475	6.66794	11.6003
						2012	7	15	196	37.5	29.6	33.55	21.5	50.388	31.8452	22.66	6.82447	10.2295
						2012	7	16	197	37	26.5	31.75	17.5	44.1911	37.1205	22.9113	6.65826	12.0879
						2012	7	17	198	36.5	25.3	30.9	16.5	43.6323	39.0945	23.3635	6.6732	12.7082
						2012	7	18	199	36.8	27.3	32.05	21	45.8729	34.8634	22.6224	6.61411	11.0363
						2012	7	19	200	39.1	27.7	33.4	23.5	41.4343	37.788	22.3837	6.72156	11.7605
						2012	7	20	201	38.8	28.8	33.8	19.5	46.5733	37.2586	23.5644	7.1314	12.1299
						2012	7	21	202	37.4	26.9	32.15	27.5	42.7374	35.8994	22.1576	6.49122	10.6113
						2012	7	22	203	38.5	27.1	32.8	24	40.5274	36.961	21.8938	6.49741	11.3923
						2012	7	23	204	39.9	30.3	35.1	25	44.9746	34.5405	22.2958	6.91745	10.7969
						2012	7	24	205	37.1	32.2	34.65	41	59.5111	23.3284	21.0774	6.4838	6.20615
						2012	7	25	206	39.6	31.9	35.75	47.5	47.5866	29.3134	21.1276	6.63556	7.10261
						2012	7	26	207	40	29.5	34.75	28	41.7683	35.0854	21.6552	6.67425	10.5796
						2012	7	27	208	38.6	29.3	33.95	21	43.6476	32.4738	21.2972	6.46399	10.5101
						2012	7	28	209	38.3	30.5	34.4	41	49.2764	30.7485	22.0194	6.74132	8.00028
						2012	7	29	210	38.8	30.6	34.7	38.5	44.797	29.3869	20.5247	6.3198	7.93206
						2012	7	30	211	37.9	29.6	33.75	37	47.4149	31.4835	21.8561	6.608	8.54352
						2012	7	31	212	36.6	24.1	30.35	28	39.4803	39.4803	22.3335	6.30696	11.3349
						2012	8	1	213	33.7	23.2	28.45	22	42.7374	35.8994	22.1576	6.01039	10.7956
						2012	8	2	214	34.5	27.2	30.85	23	50.7616	29.6448	21.9441	6.26135	9.17249
						2012	8	3	215	35.2	27.8	31.5	31	47.3584	28.0362	20.6126	5.96002	8.04369
						2012	8	4	216	35.6	26.1	30.85	44	43.9116	33.3728	21.6552	6.17892	8.03095
						2012	8	5	217	35.1	26.3	30.7	35	47.3714	33.3494	22.4842	6.39568	8.96173
						2012	8	6	218	35.7	25.4	30.55	38	41.756	34.407	21.4416	6.08026	8.88909
						2012	8	7	219	37	25.3	31.15	48.5	38.6733	36.1982	21.1653	6.07638	8.18316
						2012	8	8	220	35.4	26.3	30.85	46.5	44.4239	32.3406	21.4416	6.11799	7.5407
						2012	8	9	221	34.6	25.9	30.25	47	44.2094	30.7697	20.8638	5.8797	7.10161
						2012	8	10	222	37	27.1	32.05	49	40.907	32.3984	20.5938	6.021	7.38692
						2012	8	11	223	35.9	26.7	31.3	54.5	42.8101	31.5082	20.7759	5.98287	7.04111
						2012	8	12	224	36.4	27.7	32.05	45	45.4204	31.6126	21.4353	6.26706	7.6253
						2012	8	13	225	37	28.2	32.6	51	46.1275	32.4738	21.8938	6.47173	7.33827
						2012	8	14	226	33.7	25.3	29.5	45	47.1589	31.6908	21.8687	6.06669	7.438
						2012	8	15	227	35.5	26.9	31.2	33	45.1617	31.0712	21.1904	6.08981	8.62832
						2012	8	16	228	34.3	26.5	30.4	33	42.3895	26.451	18.942	5.35477	7.36327
						2012	8	17	229	33.7	24.9	29.3	34	41.6815	29.3438	19.7836	5.46504	7.91813
						2012	8	18	230	33.7	25.5	29.6	47	35.9692	23.5958	16.48	4.58147	5.51108
						2012	8	19	231	34.5	26.7	30.6	48.5	34.7999	21.7151	15.5505	4.41426	5.05821
						2012	8	20	232	33.3	25.6	29.45	50	34.7988	21.436	15.45	4.28153	4.83197
						2012	8	21	233	32.6	23.8	28.2	51.5	27.6421	19.4601	13.12	3.53964	4.36089
						2012	8	22	234	33.3	22.1	27.7	22.5	35.4688	31.7801	18.9922	5.06822	9.48716
						2012	8	23	235	34.4	23.5	28.95	23	36.2865	31.6419	19.1681	5.25567	9.54477
						2012	8	24	236	35.4	24.1	29.75	32	37.4835	33.8851	20.1604	5.62235	9.32056
						2012	8	25	237	36.5	25.7	31.1	31.5	29.6698	25.6347	15.6008	4.47428	7.33049
						2012	8	26	238	38	28.9	33.45	27.5	38.7636	28.2199	18.7096	5.62376	8.5722
						2012	8	27	239	38.8	30	34.4	30.5	40.6229	28.5985	19.2811	5.90298	8.47022
						2012	8	28	240	38.3	30.5	34.4	25	41.7149	26.0301	18.6405	5.70685	8.23825
						2012	8	29	241	37	29.9	33.45	22.5	45.638	25.9224	19.457	5.84841	8.35066
						2012	8	30	242	38.7	30.2	34.45	22	43.232	29.3977	20.1667	6.18001	9.52038
						2012	8	31	243	33.6	26.2	29.9	26.5	44.6167	26.4131	19.4193	5.43275	7.85945
						2012	9	1	244	31.7	24.4	28.05	28	47.0424	27.4728	20.3363	5.46863	7.84795
						2012	9	2	245	32.4	24.5	28.45	35	44.4666	28.1029	19.9971	5.42434	7.44183
						2012	9	3	246	32	21.6	26.8	23	37.1729	30.9279	19.1806	5.01725	9.09375
						2012	9	4	247	31.8	21.2	26.5	29.5	38.6049	32.737	20.1102	5.22501	8.91304
						2012	9	5	248	32.7	22.6	27.65	28.5	37.6221	30.3987	19.1304	5.09948	8.53479
						2012	9	6	249	34.6	25.5	30.05	23.5	39.4272	28.703	19.0299	5.34056	8.77795
						2012	9	7	250	35.8	26.4	31.1	18	36.514	27.4586	17.912	5.13713	9.0045
						2012	9	8	251	33.7	27.8	30.75	15.5	48.2868	22.7914	18.7661	5.34358	7.73942
						2012	9	9	252	31.3	23.2	27.25	25	40.9627	26.5438	18.6531	4.92849	7.76973
						2012	9	10	253	30.9	23.7	27.3	29	39.2636	22.6159	16.8569	4.45883	6.4258
						2012	9	11	254	33.8	23	28.4	29.5	33.2053	28.6894	17.4598	4.73096	8.07236
						2012	9	12	255	31.3	27.1	29.2	30.5	57.1734	19.2103	18.7473	5.16778	5.5774
						2012	9	13	256	31.2	22.9	27.05	28.5	39.8666	26.4714	18.3767	4.83391	7.44502
						2012	9	14	257	30.9	23.6	27.25	20	46.1417	26.9467	19.9469	5.27033	8.29376
						2012	9	15	258	30.2	22.2	26.2	32	41.1762	26.3528	18.6342	4.80875	7.04892
						2012	9	16	259	31.9	22.3	27.1	33	37.4492	28.761	18.5652	4.88892	7.65138
						2012	9	17	260	34.2	24.5	29.35	26	36.9784	28.6953	18.427	5.0957	8.48103
						2012	9	18	261	32.8	26.3	29.55	27	44.788	23.2897	18.27	5.07371	6.93336
						2012	9	19	262	30.9	22.8	26.85	44	36.1906	23.4515	16.48	4.31566	5.51534
						2012	9	20	263	29.6	21.8	25.7	39.5	39.0444	24.3637	17.4472	4.45127	5.95505
						2012	9	21	264	26.4	17.4	21.9	27.5	31.3502	22.5721	15.0481	3.5038	5.99589
						2012	9	22	265	28.9	20.7	24.8	41.5	33.5567	22.0132	15.3747	3.84134	5.22127
						2012	9	23	266	29	20.6	24.8	48.5	31.5566	21.2061	14.6336	3.65618	4.59643
						2012	9	24	267	28.8	21	24.9	48	38.2855	23.8901	17.1081	4.28447	5.16968
						2012	9	25	268	29.3	18.2	23.75	46	13.1014	11.634	6.98392	1.70192	2.75657
						2012	9	26	269	30.5	23	26.75	45	39.7317	23.839	17.4095	4.54887	5.51795
						2012	9	27	270	29.8	22.5	26.15	51.5	38.0059	22.1954	16.4298	4.23505	4.7842
						2012	9	28	271	29.5	22.6	26.05	46.5	36.2228	19.995	15.2239	3.91529	4.56187
						2012	9	29	272	32	23.2	27.6	54.5	23.421	16.4884	11.1165	2.96	3.73138
						2012	9	30	273	31.6	23.8	27.7	39.5	32.8041	20.4697	14.6587	3.91178	5.2173
						2012	10	1	274	32.4	25	28.7	39	36.2764	21.4756	15.7892	4.30606	5.55172
						2012	10	2	275	33.7	25.6	29.65	31	35.7492	23.1655	16.2791	4.53037	6.61017
						2012	10	3	276	32.6	26.4	29.5	49	34.5241	17.124	13.7543	3.81564	4.00498
						2012	10	4	277	31.6	24.2	27.9	63.5	35.9589	21.2877	15.651	4.19495	4.71313
						2012	10	5	278	27.8	22.2	25	54.5	38.2839	17.1512	14.4954	3.63866	3.72798
						2012	10	6	279	26	17.2	21.6	48.5	34.8272	24.5184	16.5303	3.81983	4.97234
						2012	10	7	280	24.8	18.5	21.65	42.5	35.1404	17.7108	14.1123	3.26522	4.0145
						2012	10	8	281	28.4	21.5	24.95	32	32.6364	18.0153	13.7166	3.43915	4.8934
						2012	10	9	282	26.8	18.8	22.8	33.5	31.4894	20.1532	14.2505	3.3933	5.13949
						2012	10	10	283	23.5	16.1	19.8	41.5	30.1293	17.8365	13.1137	2.89188	3.94141
						2012	10	11	284	24.4	13.4	18.9	52	25.3156	22.2778	13.434	2.89161	4.21152
						2012	10	12	285	25.9	16.5	21.2	49	28.0641	21.1042	13.7669	3.14896	4.27099
						2012	10	13	286	22.6	14.2	18.4	41	28.6041	19.222	13.2644	2.81621	4.10758
						2012	10	14	287	24.9	14.8	19.85	27.5	19.2681	15.5686	9.79758	2.16347	4.12021
						2012	10	15	288	25.8	17.9	21.85	20	18.9374	11.9684	8.51636	1.98046	3.6916
						2012	10	16	289	26.2	19.3	22.75	25	26.9579	14.8808	11.33	2.69457	4.30282
						2012	10	17	290	27	18.3	22.65	32	14.5058	10.096	6.84574	1.62408	2.85701
						2012	10	18	291	27.3	19	23.15	41.5	27.4407	18.2206	12.6489	3.03791	4.28462
						2012	10	19	292	27.9	19.4	23.65	38	22.8075	15.5091	10.6392	2.58643	3.91066
						2012	10	20	293	26.7	19.2	22.95	69	18.0025	10.8015	7.88831	1.8853	2.41678
						2012	10	21	294	21.9	13.1	17.5	54.5	25.9881	18.2956	12.3349	2.55375	3.40283
						2012	10	22	295	20.4	12.9	16.65	78	25.7425	15.4455	11.2798	2.27907	2.85969
						2012	10	23	296	22.6	16.2	19.4	72.5	30.241	15.4834	12.2407	2.67065	3.07228
						2012	10	24	297	16.9	12.8	14.85	85	29.0011	9.51235	9.39563	1.79919	1.78933
						2012	10	25	298	18.5	13.1	15.8	73	14.3243	6.18809	5.32586	1.04954	1.31643
						2012	10	26	299	16.8	10.1	13.45	79.5	27.9639	14.9887	11.5812	2.12262	2.50297
						2012	10	27	300	14.8	9.8	12.3	69.5	13.5521	5.42084	4.84855	0.855945	1.04904
						2012	10	28	301	17.5	10.4	13.95	70.5	17.3242	9.84013	7.38587	1.37535	1.7821
						2012	10	29	302	18.8	11.8	15.3	46	5.22237	2.92453	2.21074	0.429173	0.829802
						2012	10	30	303	20	13.2	16.6	35.5	12.5842	6.84581	5.2505	1.05932	1.75661
						2012	10	31	304	19.1	13.5	16.3	34	9.62073	4.31009	3.64269	0.728525	1.26938
						2012	11	1	305	21.7	13.8	17.75	38	10.1809	6.43436	4.57848	0.954617	1.67775
						2012	11	2	306	20.8	15.3	18.05	46.5	27.7844	12.2251	10.4256	2.1921	2.54479
						2012	11	3	307	22.6	16.5	19.55	51.5	14.3038	6.98026	5.65245	1.23821	1.59104
						2012	11	4	308	19.5	15.2	17.35	58	9.61621	3.30797	3.19049	0.657735	0.897465
						2012	11	5	309	21.4	14.4	17.9	54	14.5396	8.14215	6.15489	1.28871	1.72578
						2012	11	6	310	21.2	15.5	18.35	59	10.8677	4.95568	4.15141	0.880181	1.20178
						2012	11	7	311	21.4	15.1	18.25	51	24.1463	12.1698	9.69709	2.05029	2.4263
						2012	11	8	312	20.2	15.4	17.8	34	32.5364	12.494	11.4054	2.38138	3.01428
						2012	11	9	313	20.9	14.6	17.75	38	28.9005	14.5659	11.6064	2.41994	3.27817
						2012	11	10	314	20.1	15.4	17.75	42	33.0256	12.4176	11.4556	2.38851	2.71607
						2012	11	11	315	18.5	10.8	14.65	36.5	24.8967	15.3364	11.0537	2.10373	3.18398
						2012	11	12	316	15.5	11.2	13.35	37	30.5901	10.523	10.1493	1.85422	2.18317
						2012	11	13	317	16.2	9.6	12.9	60.5	26.4637	13.9728	10.8778	1.95861	2.30234
						2012	11	14	318	15	8.9	11.95	78	17.0056	8.29875	6.72013	1.17255	1.42802
						2012	11	15	319	14.4	9.9	12.15	47.5	30.6428	11.0314	10.4005	1.82692	1.88533
						2012	11	16	320	14.3	8.3	11.3	38.5	24.6785	11.8457	9.67197	1.65073	2.16109
						2012	11	17	321	17.5	10.9	14.2	38.5	25.7303	13.5856	10.5764	1.98497	2.75138
						2012	11	18	322	16.9	12.3	14.6	45	31.2596	11.5035	10.7271	2.03843	2.22699
						2012	11	19	323	15.9	11.9	13.9	47.5	33.3652	10.6768	10.6768	1.98505	1.97153
						2012	11	20	324	13.6	7.9	10.75	33.5	26.7994	12.2205	10.2372	1.71418	2.28858
						2012	11	21	325	16.2	10	13.1	27	24.4664	12.1353	9.74734	1.7665	2.73133
						2012	11	22	326	16.7	11.1	13.9	32.5	24.7485	11.0873	9.37051	1.74217	2.45593
						2012	11	23	327	14.6	10.5	12.55	49	30.5131	10.0083	9.88551	1.75965	1.73288
						2012	11	24	328	12.3	9	10.65	51	31.8936	8.41991	9.27002	1.54679	1.35277
						2012	11	25	329	13.6	8.4	11	53.5	25.2696	10.5122	9.21977	1.55733	1.65282
						2012	11	26	330	10.7	7.2	8.95	75.5	31.3047	8.76531	9.37051	1.47013	1.25754
						2012	11	27	331	9.8	7.1	8.45	82	35.7375	7.7193	9.39563	1.44652	1.09575
						2012	11	28	332	13.1	6.8	9.95	67	22.5825	11.3816	9.06904	1.47602	1.66545
						2012	11	29	333	13.8	8.5	11.15	56	24.7573	10.4971	9.11929	1.54838	1.66376
						2012	11	30	334	13.8	8.3	11.05	54	25.9098	11.4003	9.72221	1.64505	1.77394
						2012	12	1	335	12	6.9	9.45	35.5	27.6019	11.2616	9.97343	1.59397	1.93111
						2012	12	2	336	13.9	6.9	10.4	40.5	21.9577	12.2963	9.29514	1.53735	2.07386
						2012	12	3	337	16.6	9	12.8	30.5	21.3579	12.9856	9.42075	1.69073	2.75123
						2012	12	4	338	13.9	9.6	11.75	36.5	19.7246	6.78525	6.54428	1.13419	1.4416
						2012	12	5	339	10.4	5.5	7.95	38	24.9677	9.78735	8.84294	1.33549	1.49411
						2012	12	6	340	7.8	3.8	5.8	35.5	24.3762	7.80038	7.80038	1.07968	1.03204
						2012	12	7	341	7.6	3.3	5.45	50	24.2298	8.33505	8.03904	1.09621	0.861278
						2012	12	8	342	6.9	5	5.95	47	39.925	6.06861	8.80526	1.22652	0.749093
						2012	12	9	343	7.4	5.5	6.45	56	39.0138	5.93009	8.60428	1.22376	0.747607
						2012	12	10	344	8.7	3.9	6.3	51.5	24.8323	9.5356	8.70477	1.23039	1.06595
						2012	12	11	345	8.8	5.2	7	59	29.2945	8.43682	8.89319	1.29353	1.03833
						2012	12	12	346	7.9	4.4	6.15	38	17.121	4.79389	5.12489	0.719876	0.726903
						2012	12	13	347	9.3	4.2	6.75	70.5	23.5347	9.60214	8.5038	1.22443	1.12486
						2012	12	14	348	8.8	3	5.9	71.5	19.6566	9.12064	7.57428	1.05283	0.981065
						2012	12	15	349	7.8	3.9	5.85	63	30.4112	9.48829	9.60916	1.33286	1.00706
						2012	12	16	350	5.4	1.1	3.25	60	28.7729	9.89788	9.54636	1.17858	0.661796
						2012	12	17	351	5.9	-0.7	2.6	55.5	21.9716	11.601	9.03136	1.08057	0.626985
						2012	12	18	352	2.5	0.7	1.6	51	39.7025	5.71716	8.52264	0.969714	0.233274
						2012	12	19	353	5.3	1.2	3.25	42	24.7362	8.11347	8.01392	0.989384	0.627663
						2012	12	20	354	5.8	4.3	5.05	44	39.8703	4.78443	7.81294	1.04705	0.582762
						2012	12	21	355	6.7	4.4	5.55	40.5	28.8334	5.30534	6.99648	0.958152	0.703186
						2012	12	22	356	6.7	3.8	5.25	33.5	25.6319	5.94659	6.98392	0.944143	0.798152
						2012	12	23	357	5.4	3.8	4.6	44	42.7625	5.4736	8.65453	1.137	0.597459
						2012	12	24	358	7.8	4.9	6.35	42	32.8696	7.62575	8.95599	1.26852	0.998184
						2012	12	25	359	8.6	6.3	7.45	40.5	20.1368	3.70517	4.88623	0.723608	0.677075
						2012	12	26	360	8.6	4.6	6.6	52	4.12158	1.3189	1.3189	0.188743	0.322899
						2012	12	27	361	9.1	3	6.05	65	18.881	9.21394	7.46123	1.04368	1.00715
						2012	12	28	362	11.1	4.7	7.9	75.5	23.088	11.8211	9.34538	1.40863	1.4877
						2012	12	29	363	11.4	4.6	8	63.5	21.8267	11.8737	9.10672	1.378	1.50565
						2012	12	30	364	8.5	4.5	6.5	70	26.8099	8.57916	8.57916	1.2227	0.999924
						2012	12	31	365	7.4	4.3	5.85	77.5	32.3713	8.02808	9.11929	1.26491	0.880055
										7.3	1.8					12.3081
																	1160.16	1625.16
																	ETo-HS	ETo-TURC (Ousman Couly (2016)

## Sheet: 2013
	MARDİN					year	month	day	DOY	Tmax	Tmin	Tmean	Rhmean	Ra	Rs=0.16(Tmax-Tmin)^0.5*Ra	Rs=from meteorological station	ETo-HS	ETo-TURC (Ousman Couly (2016)
	DOY	246					#	#		°C	°C	°C	%	MJ m-2 day-1*(0.408 mm day-1)
	φ (-)	37.31	0.651182			2013	1	1	1	8.8	2.3	5.55	77	28.6372	14.8913	11.6817	1.59979	1.42172
	tan(φ)		0.762072			2013	1	2	2	7.7	2	4.85	84	30.8045	14.0468	11.7671	1.56317	1.22225
	sin(φ)		0.606127			2013	1	3	3	6.9	2	4.45	82	34.4465	13.503	12.2001	1.59206	1.10594
	cos(φ)		0.795368			2013	1	4	4	8	2.2	5.1	84	28.6221	13.2806	11.029	1.48129	1.209
	dr	0.984766		(1+0.033*cos(2*3.14/365*DOY))		2013	1	5	5	4.1	1.9	3	81.5	5.30524	0.933722	1.25903	0.153592	0.156226
	δ	0.120494		(0.409*sin(2*3.14/365*DOY-1.39))		2013	1	6	6	4.8	2.3	3.55	75.5	1.61368	0.322736	0.408232	0.051118	0.143138
	tan(δ)	0.121081				2013	1	7	7	4.7	2.2	3.45	66.5	1.29425	0.258851	0.327423	0.0408072	0.136157
	sin(δ)	0.120203				2013	1	8	8	3.8	-1	1.4	79	9.72509	3.73443	3.40906	0.383887	0.154134
	cos(δ)	0.992749				2013	1	9	9	-0.1	-1.9	-1	84	2.24113	0.322723	0.481086	0.0474024	-0.0534246
	X	0.991486				2013	1	10	10	-1.4	-3.7	-2.55	77	5.04368	0.928038	1.22386	0.109464	-0.191627		-
	ωs (eq. 25)	1.49187		(acos{(-1*tan(-0.35)*tan(0.409*sin(2*3.14/365*DOY-1.39))))		2013	1	11	11	0.9	-4.9	-2	60.5	15.7807	7.32223	6.08078	0.563488	-0.448891
	sin ωs	0.996887				2013	1	12	12	0.1	-2.7	-1.3	63.5	24.2808	5.43891	6.50074	0.629092	-0.221471
	sin φ*sin δ	-0.0728584		(sin(0.35)*sin(0.409*sin(2*3.14/365*DOY-1.39)))		2013	1	13	13	2.9	-0.8	1.05	60	22.4814	6.6545	6.91902	0.764934	0.177342
	cos φ*cos δ	0.789601		(cos(0.35)*cos(0.409*sin(2*3.14/365*DOY-1.39))		2013	1	14	14	2.5	-1	0.75	50.5	43.2894	12.121	12.9579	1.40977	0.209782
	Gsc	0.082				2013	1	15	15	3.1	-0.7	1.2	56	43.445	13.2073	13.5504	1.50999	0.351271
						2013	1	16	16	6.8	0.4	3.6	72	31.6126	16.1857	12.7959	1.60603	1.09654
	Ra	25.1244				2013	1	17	17	6.4	1.7	4.05	66.5	29.9089	11.2457	10.3745	1.3295	0.878899
						2013	1	18	18	7.6	1.9	4.75	65	30.9645	14.1198	11.8283	1.56436	1.20855
						2013	1	19	19	8.6	3.8	6.2	53.5	27.1184	10.4135	9.50616	1.33809	1.13357
						2013	1	20	20	8.8	3.6	6.2	55.5	20.7987	8.65224	7.58852	1.06816	0.973896
						2013	1	21	21	10.6	4.4	7.5	53.5	30.439	15.0978	12.1268	1.79943	1.77607
						2013	1	22	22	10.7	5.4	8.05	28.5	25.8485	10.9598	9.52124	1.44352	1.84677
						2013	1	23	23	10.5	6	8.25	33	16.3539	5.88741	5.55071	0.848055	1.09063
						2013	1	24	24	11.6	4.6	8.1	33.5	27.2562	15.2635	11.5381	1.75268	2.33099
						2013	1	25	25	8.7	6.3	7.5	47	15.831	3.03956	3.92406	0.582269	0.552771
						2013	1	26	26	11.4	6.4	8.9	76.5	21.5851	8.63402	7.7225	1.20931	1.23797
						2013	1	27	27	10	6.7	8.35	77.5	1.77331	0.468153	0.51542	0.0790498	0.283588
						2013	1	28	28	11.2	5.6	8.4	63.5	22.0149	9.86267	8.33548	1.28085	1.33012
						2013	1	29	29	11.2	4.5	7.85	38	30.6268	16.416	12.6841	1.90816	2.30873
						2013	1	30	30	6.6	3.6	5.1	57	39.1371	9.39292	10.846	1.45671	0.903208
						2013	1	31	31	4.7	1.1	2.9	59	6.43403	1.853	1.95324	0.237134	0.198031
						2013	2	1	32	4.5	1	2.75	33	8.98855	2.51679	2.69057	0.324283	0.274989
						2013	2	2	33	7.4	1.4	4.4	22	38.7442	18.5972	15.1846	1.97708	2.03631
						2013	2	3	34	6	2.7	4.35	35.5	26.6443	7.03409	7.74428	1.00606	0.76757
						2013	2	4	35	9.3	4.4	6.85	60	34.8626	13.6661	12.3475	1.7851	1.53127
						2013	2	5	36	10.6	5.2	7.9	51	27.0968	11.7058	10.0748	1.51857	1.47537
						2013	2	6	37	9	2.6	5.8	57.5	10.0534	5.14736	4.06935	0.563254	0.625614
						2013	2	7	38	7.4	3.7	5.55	56.5	10.5095	3.1108	3.23446	0.442952	0.435425
						2013	2	8	39	11.3	5.7	8.5	48.5	19.3476	8.66774	7.32558	1.12997	1.23209
						2013	2	9	40	13.5	7.2	10.35	54.5	31.4643	15.858	12.6359	2.08619	2.27164
						2013	2	10	41	11.6	8	9.8	58	13.4046	3.86052	4.06935	0.658721	0.728939
						2013	2	11	42	9.4	5.9	7.65	54.5	10.8056	3.02556	3.23446	0.482789	0.535609
						2013	2	12	43	7.8	3.4	5.6	56.5	21.8271	7.68313	7.32558	1.00537	0.8236
						2013	2	13	44	11.8	7.5	9.65	53	38.085	13.1012	12.6359	2.03431	1.84359
						2013	2	14	45	11.1	5	8.05	49	33.7824	16.4858	13.3498	2.02397	2.03984
						2013	2	15	46	11.1	6.8	8.95	48.5	30.238	10.4019	10.0325	1.57398	1.47814
						2013	2	16	47	7.3	2.5	4.9	21.5	27.5783	10.5901	9.66736	1.28707	1.36196
						2013	2	17	48	6	2.8	4.4	25.5	19.3158	4.94485	5.52851	0.719829	0.667731
						2013	2	18	49	6.1	2.4	4.25	28.5	15.8805	4.70063	4.88749	0.632065	0.60751
						2013	2	19	50	8.8	1.6	5.2	25.5	31.9853	18.4236	13.7321	1.85239	2.20998
						2013	2	20	51	6.6	3.2	4.9	28	29.1135	7.91886	8.58921	1.14353	1.00411
						2013	2	21	52	7	2.7	4.85	27.5	50.6933	17.4385	16.8192	2.2343	1.95459
						2013	2	22	53	9.7	4.1	6.9	36	30.2224	13.5396	11.4431	1.65771	1.83188
						2013	2	23	54	9.1	6.6	7.85	45.5	8.46231	1.69246	2.14081	0.322058	0.428724
						2013	2	24	55	11.2	4.8	8	60.5	41.8978	21.4517	16.959	2.56619	2.5384
						2013	2	25	56	13.6	5.4	9.5	52	40.1903	26.3648	18.414	2.94835	3.42039
						2013	2	26	57	14	8.3	11.15	39	48.7803	22.2438	18.6338	3.16387	3.72188
						2013	2	27	58	13.8	8.3	11.05	30.5	46.8407	20.6099	17.5762	2.97398	3.8165
						2013	2	28	59	11	6.3	8.65	25.5	30.0055	11.2821	10.408	1.61459	2.04681
						2013	3	1	60	8.8	1.6	5.2	37	21.241	12.2348	9.11929	1.23015	1.35545
						2013	3	2	61	10.1	3.9	7	57.5	38.0238	18.8598	15.1486	2.20339	2.06641
						2013	3	3	62	10.2	5.1	7.65	83.5	35.1849	14.3555	12.7134	1.89766	1.72187
						2013	3	4	63	13.4	6.4	9.9	72.5	35.974	20.1455	15.2285	2.47404	2.74059
						2013	3	5	64	8	2.7	5.35	49.5	31.5286	13.3681	11.6135	1.57682	1.26882
						2013	3	6	65	4.7	-2.7	1	41.5	44.7476	26.4906	19.4762	2.14749	0.620989
						2013	3	7	66	8.6	-1.8	3.4	40	42.8377	35.641	22.1036	2.74832	2.47009
						2013	3	8	67	8.9	3.4	6.15	39.5	40.6913	17.9042	15.2687	2.14475	2.07266
						2013	3	9	68	12.6	4.5	8.55	35.5	42.8457	27.764	19.5106	3.01522	4.05601
						2013	3	10	69	13.9	7.4	10.65	32	50.2095	26.109	20.4815	3.41754	4.56291
						2013	3	11	70	14.2	8.6	11.4	60	55.9971	25.0867	21.2021	3.63103	3.63797
						2013	3	12	71	15.2	8.7	11.95	70	40.5704	21.0966	16.5495	2.88763	3.18719
						2013	3	13	72	17	11.6	14.3	77	40.2612	17.3928	14.9694	2.81823	2.94769
						2013	3	14	73	18.6	12.3	15.45	70	37.775	19.0386	15.1703	2.95839	3.32333
						2013	3	15	74	20.9	13.6	17.25	65.5	44.9843	26.2708	19.4465	3.99759	4.70262
						2013	3	16	75	20.4	13.4	16.9	54	10.9887	6.1537	4.65176	0.946705	1.35388
						2013	3	17	76	13.4	4.3	8.85	73	29.0113	21.1202	14.0026	2.18864	2.66991
						2013	3	18	77	7.6	1.3	4.45	59.5	32.6174	16.4392	13.099	1.70937	1.31419
						2013	3	19	78	10.6	1.2	5.9	40	46.1043	34.6704	22.6165	3.1437	3.67655
						2013	3	20	79	13.9	5.8	9.85	56.5	48.2091	31.2395	21.9529	3.56003	4.09543
						2013	3	21	80	15.8	8.2	12	60	52.4474	31.888	23.134	4.04329	4.68142
						2013	3	22	81	15.4	11.2	13.3	67.5	47.0731	15.8166	15.4354	2.81544	2.60879
						2013	3	23	82	13.8	2.3	8.05	53	20.9239	19.25	11.3531	1.72124	2.31037
						2013	3	24	83	10.1	2.3	6.2	30.5	47.0763	29.3756	21.0363	2.96107	3.64736
						2013	3	25	84	14	2.8	8.4	28	45.1813	40.4825	24.1929	3.71755	6.2265
						2013	3	26	85	14.2	9.1	11.65	44.5	41.5153	16.9382	15.0008	2.591	2.78124
						2013	3	27	86	14.3	9.6	11.95	46	55.6498	20.9243	19.3033	3.36812	3.34428
						2013	3	28	87	14.3	7.3	10.8	61.5	48.9963	27.438	20.7411	3.4791	3.83177
						2013	3	29	88	15.2	8.9	12.05	54	37.2246	18.7612	14.9493	2.61717	2.87947
						2013	3	30	89	16.8	8.9	12.85	43.5	34.97	22.101	15.7264	2.82701	3.78144
						2013	3	31	90	18.8	10.7	14.75	72	37.7473	24.4602	17.1889	3.28146	4.0807
						2013	4	1	91	19.5	13.6	16.55	73	43.2265	20.4029	16.7995	3.38447	3.65768
						2013	4	2	92	21.5	16.5	19	68	41.3152	16.5261	14.7814	3.19029	3.22496
						2013	4	3	93	20.4	13.7	17.05	46.5	56.2119	30.1296	23.2801	4.75835	5.57914
						2013	4	4	94	22	10.9	16.45	52.5	31.3852	27.8701	16.7304	3.36074	4.85791
						2013	4	5	95	19	9.4	14.2	39.5	39.304	30.1854	19.4846	3.65687	5.59548
						2013	4	6	96	21.8	13.4	17.6	36	53.1307	35.7038	24.638	5.11536	7.5903
						2013	4	7	97	26	17.3	21.65	49	42.9344	29.8824	20.2621	4.68814	5.93856
						2013	4	8	98	24.8	18.8	21.8	71	60.5383	29.0584	23.7261	5.51047	5.72013
						2013	4	9	99	19.9	8.3	14.1	60	42.0052	38.9808	22.8903	4.28263	6.16909
						2013	4	10	100	13.8	7.5	10.65	32.5	20.7266	10.4462	8.32376	1.3889	2.01698
						2013	4	11	101	15.4	7.9	11.65	39	0	0	0	0	0.327736
						2013	4	12	102	17.7	11.6	14.65	31.5	59.0101	28.7969	23.3191	4.43807	5.98129
						2013	4	13	103	18.9	10.8	14.85	50.5	57.8525	37.4884	26.3442	5.04471	6.10383
						2013	4	14	104	21.1	12.6	16.85	75	58.6452	39.8788	27.3566	5.55947	6.88301
						2013	4	15	105	20.1	15.2	17.65	68.5	51.1661	20.0571	18.1218	3.76777	3.71142
						2013	4	16	106	17.8	9.9	13.85	64.5	23.182	14.651	10.4252	1.9352	2.49143
						2013	4	17	107	14.8	7.4	11.1	58.5	48.5917	28.7663	21.1494	3.58479	4.06806
						2013	4	18	108	16.4	8.1	12.25	46	50.8029	33.7331	23.4179	4.12725	5.27751
						2013	4	19	109	17.9	8.2	13.05	58.5	30.3524	23.5535	15.1251	2.73667	3.69842
						2013	4	20	110	13.3	7	10.15	58.5	46.6892	23.5313	18.7502	3.07366	3.20547
						2013	4	21	111	13.9	6.9	10.4	47	42.6751	23.8981	18.0652	2.98786	3.44001
						2013	4	22	112	13.4	7.4	10.4	29	36.8575	17.6916	14.4451	2.38913	3.26412
						2013	4	23	113	16.6	6.8	11.7	40	52.7255	41.3368	26.4091	4.56923	6.74195
						2013	4	24	114	15.8	8.3	12.05	49	68.7087	41.2252	30.1066	5.27077	6.06711
						2013	4	25	115	17.9	6.8	12.35	39	55.9731	49.7041	29.8374	5.27614	8.38955
						2013	4	26	116	21.8	12	16.9	22.5	57.6909	45.2296	28.8962	5.88082	10.8244
						2013	4	27	117	23.4	15.5	19.45	16.5	63.4021	40.0701	28.5126	6.22919	10.9103
						2013	4	28	118	26.2	17.2	21.7	27	59.5086	42.8462	28.5641	6.61738	10.943
						2013	4	29	119	27.5	19.1	23.3	23.5	62.0758	41.7149	28.786	6.93892	11.3886
						2013	4	30	120	29	20.7	24.85	25.5	59.7936	39.7029	27.5622	6.89447	10.9068
						2013	5	1	121	29.7	21.4	25.55	25.5	46.3603	30.7832	21.37	5.43328	8.66838
						2013	5	2	122	26.9	20.3	23.6	58.5	68.3451	36.0862	28.0931	6.82131	7.23568
						2013	5	3	123	27.4	20.4	23.9	72	61.6418	34.5194	26.0942	6.38188	6.97273
						2013	5	4	124	26.5	17.2	21.85	59	44.7443	33.2897	21.8323	5.07704	6.50325
						2013	5	5	125	27.6	19	23.3	62	58.8217	40.4693	27.5999	6.65299	8.02627
						2013	5	6	126	26.3	13.1	19.7	65	30.7405	32.4619	17.8697	3.93022	6.08094
						2013	5	7	127	25.1	15.7	20.4	58.5	30.3925	22.8552	14.9091	3.34027	4.45631
						2013	5	8	128	25.4	15.5	20.45	57.5	46.086	36.5001	23.201	5.20483	6.90105
						2013	5	9	129	24	16	20	41	50.6827	32.4369	22.9364	5.08493	6.90257
						2013	5	10	130	24.9	14.2	19.55	24	49.8553	42.6762	26.093	5.71587	10.7692
						2013	5	11	131	21.8	11.3	16.55	34	22.9524	19.28	11.8999	2.39738	4.26938
						2013	5	12	132	18.1	11.2	14.65	34	52.4285	28.9405	22.0349	4.19367	5.83934
						2013	5	13	133	19.6	8.7	14.15	31	27.6619	24.1212	14.6122	2.73813	5.01486
						2013	5	14	134	19.4	9.5	14.45	28.5	35.096	27.796	17.6683	3.34189	5.94204
						2013	5	15	135	19.8	8.6	14.2	32.5	43.8841	39.3201	23.4983	4.41016	7.8034
						2013	5	16	136	19.5	13.2	16.35	27	44.0097	22.1809	17.6742	3.53995	5.2133
						2013	5	17	137	22.6	13.4	18	24.5	56.5693	41.635	27.4533	5.76429	10.0869
						2013	5	18	138	25.2	16.9	21.05	28	55.5244	36.8682	25.5943	5.83179	9.26824
						2013	5	19	139	24.1	14.7	19.4	37.5	63.1613	47.4973	30.9838	6.75998	10.2172
						2013	5	20	140	22.8	14.2	18.5	65	27.9537	19.2321	13.1162	2.79243	3.65022
						2013	5	21	141	19.7	12.1	15.9	59.5	25.2394	15.3455	11.1328	2.20041	2.78122
						2013	5	22	142	25.7	14.7	20.2	59.5	57.4981	50.5983	30.5119	6.80019	9.37313
						2013	5	23	143	28	20.1	24.05	62.5	66.4755	42.0125	29.8948	7.33768	8.42013
						2013	5	24	144	30.4	22.9	26.65	53.5	63.7962	38.2777	27.9541	7.28761	8.00715
						2013	5	25	145	29.1	18.5	23.8	46.5	27.0564	22.9438	14.0943	3.43878	4.99831
						2013	5	26	146	26.6	15.3	20.95	38	57.1952	51.7045	30.7623	6.99131	11.3841
						2013	5	27	147	27.8	17.6	22.7	45.5	60.8411	49.6463	31.0897	7.38482	10.2778
						2013	5	28	148	27.3	16.4	21.85	36	50.1195	43.7042	26.4752	6.15674	10.1011
						2013	5	29	149	26.2	15.1	20.65	35	57.9336	51.445	30.8825	6.96428	11.673
						2013	5	30	150	28.4	18.5	23.45	31.5	52.1017	41.2645	26.2295	6.34573	10.3631
						2013	5	31	151	30	20.8	25.4	47	45.394	33.41	22.0299	5.58167	7.21551
						2013	6	1	152	29.3	21.4	25.35	50.5	63.6675	40.2378	28.632	7.24603	8.2437
						2013	6	2	153	28.1	17.4	22.75	34.5	58.8489	50.3747	30.8	7.32503	11.9719
						2013	6	3	154	31.7	21.9	26.8	35.5	59.7573	46.8497	29.9312	7.82937	11.742
						2013	6	4	155	29.9	20.1	25	34	63.7154	49.9529	31.9137	8.01105	12.3881
						2013	6	5	156	29.5	21.2	25.35	35	68.5662	45.528	31.606	7.99868	11.2613
						2013	6	6	157	26.4	17.9	22.15	47.5	67.7216	46.0507	31.5905	7.40187	9.21571
						2013	6	7	158	26.5	17.6	22.05	38.5	62.8533	44.7516	30.0015	7.01197	10.0617
						2013	6	8	159	26.9	17.4	22.15	30.5	63.2677	48.0835	31.2007	7.31053	11.857
						2013	6	9	160	30	20.7	25.35	24	52.8611	39.3287	25.7928	6.5275	11.0628
						2013	6	10	161	28.7	15.5	22.1	49	50.9685	53.8228	29.6285	6.93346	10.4725
						2013	6	11	162	29.1	17.2	23.15	49.5	54.8987	52.2636	30.3009	7.27742	10.2976
						2013	6	12	163	31.6	20.9	26.25	40.5	57.9849	49.6351	30.3478	7.84045	11.5888
						2013	6	13	164	32.4	23.5	27.95	47.5	63.3998	45.1407	30.2624	8.12012	9.86835
						2013	6	14	165	31.9	23.3	27.6	52.5	67.1384	46.1912	31.5022	8.38811	9.69705
						2013	6	15	166	30.3	22.4	26.35	40.5	70.7555	44.7175	31.8195	8.23934	10.5015
						2013	6	16	167	31.8	20	25.9	36	55.5232	52.4139	30.5165	7.8214	12.8395
						2013	6	17	168	33.4	22.4	27.9	35.5	55.8585	49.1555	29.6419	7.94492	12.4716
						2013	6	18	169	33	21.5	27.25	52.5	53.8135	49.5084	29.1985	7.71477	10.3166
						2013	6	19	170	28.2	20.1	24.15	52	53.5154	34.6779	24.3692	5.99571	7.03099
						2013	6	20	171	31.4	20	25.7	56.5	56.6756	51.6882	30.6174	7.81135	10.527
						2013	6	21	172	30.1	19.7	24.9	50.5	60.4723	50.313	31.2028	7.81428	10.1378
						2013	6	22	173	31.7	17.9	24.8	47	52.8921	58.3929	31.4377	7.85467	12.1839
						2013	6	23	174	34.9	23.3	29.1	32	56.0897	52.0512	30.5655	8.40761	13.9229
						2013	6	24	175	34	26	30	30	65.2621	41.7678	29.5343	8.27984	11.6536
						2013	6	25	176	34.5	24.9	29.7	24	59.8859	45.9923	29.6879	8.27068	13.5822
						2013	6	26	177	36.9	23.6	30.25	23.5	51.4059	54.6958	29.9957	8.45318	16.2233
						2013	6	27	178	36.9	26	31.45	32.5	54.7524	47.7441	28.9225	8.35431	13.0747
						2013	6	28	179	35.2	26.3	30.75	36	63.7577	45.3955	30.4332	8.66573	11.8729
						2013	6	29	180	35.9	25.9	30.9	37	59.3421	47.4737	30.025	8.5759	12.2645
						2013	6	30	181	36.9	26.2	31.55	32.5	58.5569	50.1247	30.6472	8.87045	13.7134
						2013	7	1	182	32.8	24.7	28.75	12	69.483	45.025	31.6403	8.63831	14.8083
						2013	7	2	183	32.9	19.9	26.4	12.5	50.0404	52.042	28.8677	7.48346	16.4335
						2013	7	3	184	33.4	21.5	27.45	12.5	55.4623	52.8001	30.612	8.12416	16.8978
						2013	7	4	185	34.5	23.8	29.15	21.5	58.0865	49.7221	30.401	8.37126	14.9224
						2013	7	5	186	35.6	24.5	30.05	31	57.5	51.06	30.6514	8.602	13.9736
						2013	7	6	187	36.2	25.8	31	50.5	60.0731	49.9808	30.9968	8.87165	10.8783
						2013	7	7	188	36.5	27.3	31.9	42	63.2652	46.5632	30.7029	8.94959	11.4311
						2013	7	8	189	36.3	27.9	32.1	25.5	65.5285	44.0352	30.3872	8.89321	13.1558
						2013	7	9	190	36.3	26.3	31.3	22.5	60.153	48.1224	30.4353	8.7645	14.6569
						2013	7	10	191	36.3	27	31.65	25.5	21.6595	16.1147	10.5684	3.06509	5.16892
						2013	7	11	192	36.3	27.3	31.8	25.5	59.506	42.8443	28.5629	8.30906	12.7778
						2013	7	12	193	36.5	26.2	31.35	23	56.1215	46.2441	28.8183	8.3073	14.0436
						2013	7	13	194	37	26.2	31.6	25.5	56.1623	48.5242	29.5309	8.55602	14.3638
						2013	7	14	195	36.3	27.3	31.8	27	61.7452	44.4565	29.6377	8.62172	13.0261
						2013	7	15	196	37.3	26	31.65	30.5	56.4043	50.9895	30.3369	8.79844	14.2737
						2013	7	16	197	36.3	28.7	32.5	45	69.1645	42.052	30.5077	9.00007	10.0315
						2013	7	17	198	33.5	27.2	30.35	35.5	75.4302	38.0168	30.2925	8.5546	10.0443
						2013	7	18	199	32.7	21.3	27	27.5	55.9827	51.0563	30.2431	7.94644	13.9956
						2013	7	19	200	32	22.7	27.35	44	60.8364	45.2623	29.6842	7.86051	10.2925
						2013	7	20	201	34.1	22.6	28.35	36.5	54.9648	50.5676	29.8232	8.07223	12.7343
						2013	7	21	202	36.6	26.9	31.75	50.5	58.863	45.6777	29.3324	8.52432	10.0568
						2013	7	22	203	35.6	25.5	30.55	47	57.1298	46.1609	29.0498	8.23774	10.462
						2013	7	23	204	34.9	26.2	30.55	37	61.2854	42.6546	28.9225	8.20164	11.0308
						2013	7	24	205	35.8	25.7	30.75	32.5	57.3637	46.3498	29.1687	8.30567	12.6162
						2013	7	25	206	36.5	25.8	31.15	31	54.8865	46.9829	28.7262	8.24705	13.0551
						2013	7	26	207	36.3	22.8	29.55	30.5	38.0783	41.1246	22.3854	6.21659	11.3613
						2013	7	27	208	33.4	23.1	28.25	25.5	58.4568	48.1684	30.0174	8.10721	13.7384
						2013	7	28	209	32.8	22.1	27.45	42.5	55.5201	47.5252	29.0578	7.71168	11.0115
						2013	7	29	210	36.3	20.4	28.35	42.5	25.1635	32.0079	16.0542	4.34539	7.65345
						2013	7	30	211	36.3	20.2	28.25	37.5	22.8982	29.4928	14.7006	3.97037	7.53705
						2013	7	31	212	36.3	25.8	31.05	41.5	49.0285	41.1839	25.4193	7.28276	10.1436
						2013	8	1	213	36.3	23.1	29.7	32.5	13.2494	13.9914	7.70199	2.14568	4.14041
						2013	8	2	214	36.3	24.5	30.4	49.5	43.703	41.2557	24.02	6.79028	9.06184
						2013	8	3	215	36.2	24.9	30.55	53	52.6085	47.558	28.2953	8.02378	10.3225
						2013	8	4	216	35.5	23.9	29.7	48.5	53.0501	49.2305	28.9091	8.05373	10.7972
						2013	8	5	217	32.5	20.2	26.35	43.5	52.2661	51.4298	29.3287	7.59436	11.5543
						2013	8	6	218	36.3	22.5	29.4	39.5	17.4109	19.2217	10.3486	2.86478	5.03085
						2013	8	7	219	36.3	29.3	32.8	15.5	24.8468	13.9142	10.5182	3.12146	5.0823
						2013	8	8	220	36.3	23.2	29.75	34.5	21.112	22.1254	12.226	3.40961	6.09559
						2013	8	9	221	36.3	23.2	29.75	54	42.1727	44.197	24.4224	6.81092	9.53927
						2013	8	10	222	36.3	24.4	30.35	50	44.2723	42.1472	24.4358	6.90065	9.17764
						2013	8	11	223	36.3	29.7	33	51	59.2458	31.2818	24.3528	7.25574	7.11236
						2013	8	12	224	34.9	27.4	31.15	53.5	54.6306	32.7783	23.9379	6.87238	7.29591
						2013	8	13	225	34.2	26.7	30.45	51	54.0171	32.4103	23.6691	6.69803	7.16535
						2013	8	14	226	36.5	25.9	31.2	43.5	45.0214	38.1781	23.4526	6.73994	9.21296
						2013	8	15	227	36	28.3	32.15	49	55.1037	33.9439	24.4651	7.1672	7.7256
						2013	8	16	228	36.3	28.7	32.5	50.5	50.978	30.9946	22.4859	6.63354	7.01742
						2013	8	17	229	36.3	30	33.15	51.5	57.5665	29.0135	23.1185	6.90832	6.63832
						2013	8	18	230	36.3	26.4	31.35	50.5	43.6941	34.6057	21.9968	6.34091	7.69422
						2013	8	19	231	35	25.2	30.1	48.5	51.1614	40.1106	25.6257	7.19912	8.91821
						2013	8	20	232	34.1	24.6	29.35	48.5	51.1479	38.8724	25.2237	6.97524	8.5836
						2013	8	21	233	33.3	24	28.65	49.5	50.515	37.5832	24.648	6.71484	8.13
						2013	8	22	234	35.2	24.8	30	44.5	48.6193	40.4513	25.0868	7.03302	9.48266
						2013	8	23	235	34.4	27.5	30.95	51	57.6905	31.8452	24.2465	6.93253	7.08577
						2013	8	24	236	36.3	22.7	29.5	50	43.8334	47.6907	25.8639	7.17503	10.2302
						2013	8	25	237	36.3	22.4	29.35	37.5	40.9412	45.5266	24.4224	6.75363	11.513
						2013	8	26	238	34.1	25.5	29.8	38	52.0783	35.8298	24.4358	6.82183	9.15972
						2013	8	27	239	35.6	25.8	30.7	50	48.6202	38.1182	24.3528	6.92723	8.37334
						2013	8	28	240	36.7	26.2	31.45	53.5	46.1713	38.7839	23.9379	6.9145	8.57911
						2013	8	29	241	36.6	28.6	32.6	52.5	52.3018	33.4732	23.6691	6.99649	7.55045
						2013	8	30	242	34.7	29	31.85	47	61.3952	27.9962	23.4526	6.82935	6.61232
						2013	8	31	243	36.3	25	30.65	45	45.487	41.1202	24.4651	6.95197	9.6361
						2013	9	1	244	34.7	27.2	30.95	39	51.3167	30.79	22.4859	6.42913	7.94431
						2013	9	2	245	34.5	27.3	30.9	42.5	54.3518	31.3066	23.3346	6.66495	7.71638
						2013	9	3	246	31.1	24.7	27.9	22	61.7388	31.6103	24.9901	6.69811	9.51196
						2013	9	4	247	32.5	23.8	28.15	42.5	49.852	34.697	23.5268	6.34038	8.23677
						2013	9	5	248	27.3	18.3	22.8	47.5	52.894	38.0837	25.3891	6.04563	7.78012
						2013	9	6	249	29	16.8	22.9	68	45.7452	44.6473	25.565	6.1025	8.75431
						2013	9	7	250	29	20.1	24.55	37	51.7667	36.8579	24.7096	6.13743	8.8865
						2013	9	8	251	30.6	22.4	26.5	23	52.7421	34.5988	24.1649	6.2785	10.0639
						2013	9	9	252	28.5	21.8	25.15	40	56.9469	30.5235	23.5845	5.94099	7.23775
						2013	9	10	253	29.5	19	24.25	48	44.5957	37.4604	23.121	5.70218	7.79146
						2013	9	11	254	31.4	20.8	26.1	57.5	45.5985	38.6675	23.7533	6.11584	8.02358
						2013	9	12	255	32.1	22.5	27.3	45.5	46.9805	36.081	23.2902	6.16052	8.12785
						2013	9	13	256	32.8	22.5	27.65	54	46.1045	37.9901	23.6746	6.31079	8.05502
						2013	9	14	257	33.6	26.1	29.85	47.5	53.2441	31.9464	23.3304	6.52008	7.27324
						2013	9	15	258	30.7	25.5	28.1	26	62.4189	25.9663	22.7739	6.13082	7.61466
						2013	9	16	259	29	20.1	24.55	55	47.8773	34.0886	22.8531	5.67631	6.96175
						2013	9	17	260	26.8	21.2	24	47	59.8885	26.8301	22.6755	5.55907	5.7535
						2013	9	18	261	24.7	16.4	20.55	46	43.5236	28.8996	20.0624	4.5125	5.87062
						2013	9	19	262	27	19.5	23.25	45	40.3184	24.191	17.6666	4.25339	5.3059
						2013	9	20	263	27.3	19.8	23.55	55.5	49.1333	29.48	21.5291	5.2212	5.97864
						2013	9	21	264	27.2	20.5	23.85	58	50.3006	26.9611	20.832	5.08878	5.52869
						2013	9	22	265	26.4	18.6	22.5	49.5	47.5073	29.6446	21.2289	5.01766	5.94479
						2013	9	23	266	25.7	17.5	21.6	46.5	38.6505	25.3547	17.7085	4.0921	5.27208
						2013	9	24	267	23.3	16	19.65	19	49.5529	28.9389	21.4215	4.70512	7.87065
						2013	9	25	268	24	15.8	19.9	15.5	46.6211	30.5834	21.3604	4.72301	8.62189
						2013	9	26	269	25.8	16	20.9	24	43.4065	34.0307	21.7414	4.93477	8.94011
						2013	9	27	270	28.7	17.8	23.25	25.5	40.9107	35.6742	21.6108	5.20297	9.60654
						2013	9	28	271	25.7	19.7	22.7	57	51.5888	24.7626	20.2186	4.80258	5.01225
						2013	9	29	272	27.5	18.7	23.1	58	42.2999	29.7791	20.0771	4.81606	5.98989
						2013	9	30	273	27.6	18.5	23.05	53.5	41.9958	30.573	20.2697	4.85632	6.13386
						2013	10	1	274	28.3	20.6	24.45	23.5	37.4667	23.0795	16.6345	4.12197	6.66649
						2013	10	2	275	28.3	20.6	24.45	28.5	29.0914	17.9203	12.9161	3.20055	5.0254
						2013	10	3	276	24.8	20.6	22.7	23	49.4379	16.6111	16.2108	3.85059	4.83713
						2013	10	4	277	20.3	14.8	17.55	26	45.8097	20.1563	17.1893	3.56382	4.99315
						2013	10	5	278	18.1	10	14.05	24.5	36.9896	23.9693	16.8439	3.14644	5.33039
						2013	10	6	279	16.2	10.3	13.25	18.5	38.0003	17.9361	14.7684	2.68945	4.22206
						2013	10	7	280	16.4	12.3	14.35	19	25.1549	8.25082	8.14958	1.53668	2.26143
						2013	10	8	281	17.8	8.7	13.25	23	20.5863	14.9868	9.93617	1.80946	3.44065
						2013	10	9	282	21.8	10.3	16.05	36.5	37.4918	34.4925	20.3425	4.03861	6.99256
						2013	10	10	283	23.8	14.5	19.15	51.5	40.8116	30.3638	19.9134	4.31546	5.64164
						2013	10	11	284	26.3	17.8	22.05	24.5	40.5787	27.5935	18.929	4.42409	7.47142
						2013	10	12	285	26.5	17.5	22	37.5	39.6832	28.5719	19.0479	4.4463	6.66097
						2013	10	13	286	27	16.3	21.65	52.5	35.4833	30.3737	18.571	4.29686	5.94489
						2013	10	14	287	26	15.6	20.8	40	33.4167	27.8027	17.2425	3.90351	6.15317
						2013	10	15	288	26.4	18.4	22.4	45	37.0156	23.69	16.7513	3.94952	5.12842
						2013	10	16	289	25.5	18.3	21.9	68.5	40.1336	23.1169	17.2303	4.01192	4.63767
						2013	10	17	290	24.7	16.8	20.75	70	37.8599	23.9275	17.026	3.84951	4.68132
						2013	10	18	291	24.6	18.8	21.7	74	27.3595	12.6948	10.5424	2.44234	2.71001
						2013	10	19	292	19.5	11.1	15.3	81	35.8716	24.1057	16.6345	3.22929	4.10054
						2013	10	20	293	16.7	9.5	13.1	55	30.0846	17.3287	12.9161	2.34076	2.80638
						2013	10	21	294	19.8	9.9	14.85	62	32.2008	25.5031	16.2108	3.10424	4.25543
						2013	10	22	295	22.4	13.4	17.9	75	35.8111	25.784	17.1893	3.59911	4.7013
						2013	10	23	296	24.1	14.9	19.5	66	34.7079	25.545	16.8439	3.68484	4.84213
						2013	10	24	297	21.9	14.4	18.15	62.5	33.7041	20.2224	14.7684	3.11387	3.78706
						2013	10	25	298	21.7	14.9	18.3	76	19.5326	10.6257	8.14958	1.72548	2.16626
						2013	10	26	299	19.4	12.8	16.1	62.5	24.1728	12.7632	9.93617	1.97554	2.38368
						2013	10	27	300	20.9	11.7	16.3	40	0	0	0	0	0.385605
						2013	10	28	301	21.1	13	17.05	34.5	0	0	0	0	0.420991
						2013	10	29	302	21.9	13.7	17.8	33	31.5124	20.6721	14.438	3.01457	4.75928
						2013	10	30	303	22.3	14.9	18.6	31	33.8541	20.0416	14.7349	3.14569	4.82881
						2013	10	31	304	22.1	15.8	18.95	33	34.9152	17.5973	14.0218	3.02225	4.23387
						2013	11	1	305	22	15.1	18.55	28	31.7537	17.5281	13.3456	2.84519	4.41936
						2013	11	2	306	22.7	15.6	19.15	27	31.1629	17.7005	13.2858	2.87918	4.57069
						2013	11	3	307	20.4	13.3	16.85	27.5	30.9537	17.5817	13.1966	2.68184	4.26322
						2013	11	4	308	21	13.9	17.45	59	31.9839	18.1669	13.6358	2.81908	3.37687
						2013	11	5	309	18.1	14.8	16.45	79	45.7098	12.0674	13.2858	2.6688	2.29557
						2013	11	6	310	19.3	14.9	17.1	68.5	39.3202	13.8407	13.1966	2.70119	2.6308
						2013	11	7	311	20.8	11.8	16.3	73.5	28.4079	20.4537	13.6358	2.72711	3.6394
						2013	11	8	312	17.1	9.8	13.45	71	15.7176	9.17909	6.79466	1.24533	1.65154
						2013	11	9	313	13.2	10.5	11.85	65.5	6.24132	1.34812	1.64089	0.285345	0.470389
						2013	11	10	314	14.7	10.9	12.8	60.5	15.638	4.75394	4.87744	0.875349	0.976861
						2013	11	11	315	15.8	10.4	13.1	62	24.1103	10.4157	8.96437	1.6246	1.80731
						2013	11	12	316	15.7	9.5	12.6	61	34.3686	17.0468	13.6923	2.44129	2.70827
						2013	11	13	317	17	10.6	13.8	55.5	34.4748	17.6511	13.9544	2.58623	2.93238
						2013	11	14	318	17.9	12.4	15.15	72.5	36.1409	15.902	13.5613	2.62074	2.80264
						2013	11	15	319	16.8	10.2	13.5	52	32.9268	17.3854	13.5345	2.48458	2.8598
						2013	11	16	320	16.9	9.5	13.2	64	27.6378	16.3616	12.0293	2.1871	2.67744
						2013	11	17	321	15.4	8.9	12.15	61	18.3596	9.54701	7.48929	1.31554	1.61439
						2013	11	18	322	14.8	9.7	12.25	51	33.2614	13.5706	12.0184	2.11816	2.18243
						2013	11	19	323	17.1	10.6	13.85	55.5	24.164	12.5653	9.85704	1.82973	2.18102
						2013	11	20	324	17.7	11.1	14.4	54	24.9887	13.194	10.2715	1.93981	2.32068
						2013	11	21	325	13.9	8.9	11.4	64	37.5936	15.0374	13.4499	2.3034	2.29274
						2013	11	22	326	16	9.3	12.65	87	30.2255	16.2009	12.5179	2.23556	2.59413
						2013	11	23	327	15.7	10.9	13.3	85.5	28.9794	11.1281	10.1585	1.85293	1.92573
						2013	11	24	328	14.6	9.1	11.85	82.5	24.0486	10.5814	9.02382	1.56922	1.73364
						2013	11	25	329	13.9	9.4	11.65	75	24.0825	8.66969	8.17386	1.41182	1.45811
						2013	11	26	330	14.1	9.5	11.8	75.5	19.4646	7.16299	6.67952	1.15959	1.26296
						2013	11	27	331	13.6	10.3	11.95	88	14.1116	3.72545	4.10159	0.71566	0.799382
						2013	11	28	332	14	6.3	10.15	86	13.9403	8.5872	6.18922	1.01458	1.33582
						2013	11	29	333	9.7	7.6	8.65	84	12.4673	2.09451	2.8907	0.448433	0.474451
						2013	11	30	334	9	3.9	6.45	87	33.47	13.6557	12.0937	1.72005	1.46777
						2013	12	1	335	10.7	3.4	7.05	75.5	26.9751	15.7534	11.6612	1.69957	1.76856
						2013	12	2	336	12.3	7.2	9.75	79.5	16.8891	6.89075	6.10255	0.986055	1.09674
						2013	12	3	337	11.6	4.7	8.15	77	15.5073	8.56002	6.51748	0.99194	1.1623
						2013	12	4	338	7.3	0.3	3.8	80.5	20.4424	11.4478	8.65369	1.09628	0.84827
						2013	12	5	339	6.9	2.2	4.55	88	4.35875	1.63889	1.51193	0.198187	0.269033
						2013	12	6	340	10.3	2.8	6.55	84	26.8165	16.0899	11.7504	1.67811	1.71296
						2013	12	7	341	7.6	3.9	5.75	87	19.2231	5.69005	5.91623	0.817154	0.668334
						2013	12	8	342	6.5	-0.8	2.85	77	6.05924	3.5386	2.61939	0.31724	0.278592
						2013	12	9	343	-0.8	-4.6	-2.7	84.5	29.3213	8.91368	9.14525	0.809917	-0.748787
						2013	12	10	344	2.2	-3.4	-0.6	92.5	30.6315	13.7229	11.598	1.16998	-0.20425
						2013	12	11	345	-1.1	-3.8	-2.45	79.5	7.11724	1.53732	1.87117	0.168457	-0.219518
						2013	12	12	346	-3.3	-5	-4.15	76	20.4559	2.782	4.26739	0.341636	-0.57768
						2013	12	13	347	0	-4.8	-2.4	60	6.6315	2.5465	2.32462	0.209962	-0.273774
						2013	12	14	348	1.8	-1.1	0.35	61.5	15.6619	3.63355	4.26739	0.454263	0.0404564
						2013	12	15	349	-0.4	-3.6	-2	74.5	8.1219	2.07921	2.32462	0.215416	-0.198839
						2013	12	16	350	1.7	-1.5	0.1	71	9.55552	2.44621	2.73495	0.287124	0.00931275
						2013	12	17	351	6.8	-2.3	2.25	85	22.3126	16.2436	10.7694	1.26641	0.741314
						2013	12	18	352	6.5	2.4	4.45	89	26.0182	8.53398	8.42927	1.09999	0.753511
						2013	12	19	353	5.7	1.4	3.55	91.5	34.53	11.8783	11.4565	1.43455	0.828687
						2013	12	20	354	3.2	-0.7	1.25	86	38.5553	12.0293	12.1825	1.36113	0.33669
						2013	12	21	355	5.8	-0.1	2.85	70.5	26.6062	12.5581	10.3402	1.25233	0.725022
						2013	12	22	356	8.4	2.7	5.55	73	32.3697	14.7606	12.365	1.69337	1.41077
						2013	12	23	357	10.8	3.1	6.95	81	26.4905	16.3181	11.7613	1.70725	1.80685
						2013	12	24	358	9.7	2.8	6.25	63	28.3058	15.6248	11.8965	1.67804	1.61517
						2013	12	25	359	9.3	3	6.15	73.5	26.5026	13.3573	10.6434	1.49504	1.39245
						2013	12	26	360	9.6	3.7	6.65	93	19.876	9.38149	7.7246	1.1077	1.09231
						2013	12	27	361	11.3	3.5	7.4	88.5	20.3618	12.7057	9.09877	1.34478	1.51524
						2013	12	28	362	12.1	5.1	8.6	61.5	25.6786	14.38	10.8703	1.68311	1.86056
						2013	12	29	363	12.9	7	9.95	53	17.9023	8.4499	6.95754	1.13237	1.30302
						2013	12	30	364	10.5	4.5	7.5	75	4.61414	2.21479	1.80837	0.268333	0.444828
						2013	12	31	365	6	3.8	4.9	73.5	6.18386	1.08836	1.46754	0.195382	0.242609
																	1411.23	1937.26
																	ETo-HS	ETo-TURC (Ousman Couly (2016)

## Sheet: 2014
	MARDİN					year	month	day	DOY	Tmax	Tmin	Tmean	Rhmean	Ra	Rs=0.16(Tmax-Tmin)^0.5*Ra	Rs=from meteorological station	ETo-HS	ETo-TURC (Ousman Couly (2016)
	DOY	246					#	#		°C	°C	°C	%	MJ m-2 day-1*(0.408 mm day-1)
	φ (-)	37.31	0.651182			2014	1	1	1	8.6	3.1	5.85	55.5	29.7103	13.0725	11.1483	1.54635	1.31881
	tan(φ)		0.762072			2014	1	2	2	8.3	4.7	6.5	51.5	36.5933	10.5389	11.1089	1.58324	1.18359
	sin(φ)		0.606127			2014	1	3	3	8.9	4.4	6.65	60	31.6087	11.3791	10.7284	1.53844	1.28252
	cos(φ)		0.795368			2014	1	4	4	8.4	3.6	6	57.5	31.2369	11.995	10.9498	1.52846	1.24752
	dr	0.984766		(1+0.033*cos(2*3.14/365*DOY))		2014	1	5	5	5.2	-0.2	2.5	73	32.0698	13.8541	11.9237	1.41963	0.706097
	δ	0.120494		(0.409*sin(2*3.14/365*DOY-1.39))		2014	1	6	6	6	-0.5	2.75	82.5	31.1294	16.1873	12.6983	1.53048	0.877823
	tan(δ)	0.121081				2014	1	7	7	9.4	2.7	6.05	83	30.4792	16.3369	12.623	1.7657	1.64179
	sin(δ)	0.120203				2014	1	8	8	11.7	4.5	8.1	83	29.2468	16.8462	12.5564	1.90736	2.05839
	cos(δ)	0.992749				2014	1	9	9	10.8	5.7	8.25	84	33.2266	13.5565	12.0058	1.83429	1.72111
	X	0.991486				2014	1	10	10	11	5.4	8.2	95	25.0637	11.2285	9.48984	1.44711	1.4593		-
	ωs (eq. 25)	1.49187		(acos{(-1*tan(-0.35)*tan(0.409*sin(2*3.14/365*DOY-1.39))))		2014	1	11	11	10.5	3.1	6.8	77	29.3568	17.3792	12.7775	1.84352	1.88262
	sin ωs	0.996887				2014	1	12	12	9.5	3.8	6.65	65.5	31.8841	14.5392	12.1796	1.74654	1.58342
	sin φ*sin δ	-0.0728584		(sin(0.35)*sin(0.409*sin(2*3.14/365*DOY-1.39)))		2014	1	13	13	4.7	2.8	3.75	69.5	6.16816	0.937561	1.36036	0.171936	0.187709
	cos φ*cos δ	0.789601		(cos(0.35)*cos(0.409*sin(2*3.14/365*DOY-1.39))		2014	1	14	14	6.9	3.7	5.3	73.5	22.0017	5.63243	6.29725	0.853161	0.625022
	Gsc	0.082				2014	1	15	15	8.7	3.9	6.3	66	24.3653	9.35626	8.54106	1.20725	1.04951
						2014	1	16	16	10.1	4.7	7.4	57	0	0	0	0	0.214038
	Ra	25.1244				2014	1	17	17	8.7	5.3	7	52.5	26.4738	7.20086	7.81043	1.13604	0.916417
						2014	1	18	18	10.6	3.2	6.9	55	30.7729	18.2175	13.3938	1.9403	1.98346
						2014	1	19	19	12.2	5.8	9	49.5	27.8774	14.2732	11.284	1.77364	1.91581
						2014	1	20	20	12.1	6	9.05	65	32.0141	15.6229	12.651	1.99222	2.06625
						2014	1	21	21	9.6	5.7	7.65	73	32.2292	10.0555	10.1836	1.52005	1.27166
						2014	1	22	22	8.9	5.1	7	66.5	13.1746	4.00508	4.10912	0.59768	0.601196
						2014	1	23	23	7.3	5.5	6.4	65.5	9.55747	1.37628	2.05163	0.291194	0.321359
						2014	1	24	24	9.7	3.3	6.5	69	33.5718	17.1888	13.5889	1.93668	1.80682
						2014	1	25	25	10.3	5.1	7.7	74	25.5829	10.6425	9.33408	1.39598	1.33887
						2014	1	26	26	7.3	5	6.15	69	11.4074	2.09896	2.76803	0.388816	0.377601
						2014	1	27	27	7.9	5.1	6.5	76.5	1.76406	0.395149	0.472294	0.067311	0.23291
						2014	1	28	28	8.8	6	7.4	77	8.07901	1.8097	2.163	0.319688	0.399371
						2014	1	29	29	7.9	5.4	6.65	75	9.09785	1.81957	2.30159	0.330047	0.372267
						2014	1	30	30	7.5	5.5	6.5	70.5	18.6003	2.97605	4.20877	0.599832	0.474795
						2014	1	31	31	8.7	1.8	5.25	76.5	36.4151	20.1011	15.3047	2.06902	1.78351
						2014	2	1	32	6.8	0.9	3.85	90.5	39.8695	18.8184	15.4948	1.96749	1.32383
						2014	2	2	33	4.3	-1.5	1.4	81	40.5768	18.8277	15.6355	1.76068	0.553553
						2014	2	3	34	2.5	-4.6	-1.05	55.5	37.7439	21.4385	16.0915	1.58081	-0.548999
						2014	2	4	35	2	-3.9	-0.95	54.5	41.353	19.5186	16.0714	1.58826	-0.452935
						2014	2	5	36	6	-3.2	1.4	62	34.1333	25.1221	16.565	1.86535	0.720125
						2014	2	6	37	8	0.6	4.3	65.5	36.6419	21.692	15.9483	2.06716	1.64256
						2014	2	7	38	9.1	2.5	5.8	83	38.954	20.5677	16.0119	2.21627	1.95858
						2014	2	8	39	8.5	2.5	5.5	68.5	42.2452	20.2777	16.5567	2.26254	1.86034
						2014	2	9	40	11.3	3.6	7.45	58	37.0253	22.8076	16.4386	2.43441	2.56129
						2014	2	10	41	10.5	4.2	7.35	58.5	35.9578	18.1227	14.4405	2.13005	2.06061
						2014	2	11	42	10	5	7.5	69.5	45.162	18.0648	16.1576	2.39754	2.08266
						2014	2	12	43	14.6	4.9	9.75	82.5	0	0	0	0	0.255233
						2014	2	13	44	14.4	8.5	11.45	69	0	0	0	0	0.280471
						2014	2	14	45	14	8.8	11.4	53.5	0	0	0	0	0.279775
						2014	2	15	46	9.1	2.7	5.9	45.5	5.09551	2.6089	2.06252	0.286691	0.437645
						2014	2	16	47	7	1.2	4.1	65	15.9219	7.38777	6.13521	0.788028	0.630694
						2014	2	17	48	11.1	4.5	7.8	86.5	41.5351	21.9306	17.0729	2.5634	2.54744
						2014	2	18	49	14.4	5.4	9.9	75	35.2641	25.3902	16.9268	2.74993	3.38701
						2014	2	19	50	14.1	8.1	11.1	76	41.4076	19.8756	16.2284	2.75069	2.89593
						2014	2	20	51	16.3	10.4	13.35	68	43.2341	20.4065	16.8024	3.06972	3.28401
						2014	2	21	52	16.1	8.9	12.5	79	39.3534	22.6675	16.8954	3.00247	3.48856
						2014	2	22	53	15.8	10.3	13.05	65.5	39.4248	17.3469	14.7935	2.67667	2.80328
						2014	2	23	54	16.7	10.5	13.6	66.5	40.276	19.9769	16.0458	2.95502	3.25294
						2014	2	24	55	17.1	11.4	14.25	69	45.138	20.5829	17.2425	3.24113	3.42419
						2014	2	25	56	15	10.6	12.8	53	26.3931	9.29037	8.85802	1.58974	1.62436
						2014	2	26	57	10.9	5.7	8.3	53.5	37.3226	15.5262	13.6174	2.0845	1.94534
						2014	2	27	58	11.7	4.4	8.05	54	32.121	18.7586	13.8858	2.10522	2.25717
						2014	2	28	59	10.4	3.9	7.15	55.5	33.4552	17.3967	13.6471	1.99701	1.94999
						2014	3	1	60	10.9	6.5	8.7	81	0	0	0	0	0.237837
						2014	3	2	61	13	8.1	10.55	79	0	0	0	0	0.267528
						2014	3	3	62	15	12.5	13.75	63.5	0	0	0	0	0.309865
						2014	3	4	63	13.5	8.5	11	49.5	9.82703	3.93081	3.51582	0.593865	0.795293
						2014	3	5	64	14.6	7.1	10.85	77	32.2918	19.3751	14.1495	2.37758	2.79295
						2014	3	6	65	16.3	9.6	12.95	45	38.0141	20.3756	15.7435	2.83933	3.45725
						2014	3	7	66	16.5	11.2	13.85	32.5	53.4248	22.6521	19.6789	3.65294	4.6027
						2014	3	8	67	18.9	11.9	15.4	43.5	43.6909	24.4669	18.4952	3.60136	4.55774
						2014	3	9	68	20.8	13.4	17.1	45	40.0887	23.7325	17.4485	3.5715	4.56893
						2014	3	10	69	15.3	7.9	11.6	44.5	2.92827	1.73354	1.27452	0.219767	0.55751
						2014	3	11	70	10.9	5.4	8.15	44	41.0037	18.0416	15.386	2.34169	2.38541
						2014	3	12	71	8.6	4.7	6.65	62	20.5246	6.40367	6.48524	0.929979	0.808762
						2014	3	13	72	7.3	3.2	5.25	63.5	23.1453	7.59165	7.4985	1.01371	0.778118
						2014	3	14	73	7.6	4.2	5.9	50	25.889	7.04182	7.63793	1.06168	0.799143
						2014	3	15	74	12.9	5	8.95	46	50.5677	31.9588	22.7409	3.56778	4.16979
						2014	3	16	75	11.4	7.6	9.5	42.5	48.1408	14.6348	15.015	2.40412	2.22579
						2014	3	17	76	8.9	5.5	7.2	66	11.5807	3.14994	3.41659	0.500958	0.526827
						2014	3	18	77	10.4	6.5	8.45	77	23.9844	7.48314	7.57847	1.16675	1.06937
						2014	3	19	78	13.6	5.3	9.45	64	51.9029	34.4635	23.9249	3.82371	4.3797
						2014	3	20	79	15.8	8.5	12.15	48.5	53.46	31.2207	23.1106	4.05953	4.72019
						2014	3	21	80	15.5	9.1	12.3	49.5	56.1271	28.7371	22.7187	4.01067	4.33638
						2014	3	22	81	18	7.6	12.8	47	47.786	39.7579	24.6568	4.42514	6.22911
						2014	3	23	82	18	12	15	61	60.7744	29.1717	23.8186	4.58203	4.84556
						2014	3	24	83	19	12.4	15.7	69	54.7486	28.9073	22.5043	4.42159	4.91413
						2014	3	25	84	18.5	12.6	15.55	54	61.3142	28.9403	23.8291	4.66091	4.89628
						2014	3	26	85	18.5	12.6	15.55	48.5	53.3353	25.1743	20.7282	4.05438	4.39423
						2014	3	27	86	17.4	10.7	14.05	46	51.9202	27.8293	21.5028	4.01672	4.74216
						2014	3	28	87	18.2	12.4	15.3	66	55.8957	25.9356	21.5383	4.18127	4.38698
						2014	3	29	88	18.1	10.5	14.3	66	36.2154	22.019	15.9742	3.00741	3.64761
						2014	3	30	89	16.1	-3.3	6.4	61.5	23.4616	36.4125	16.534	2.34673	3.56957
						2014	3	31	90	7.2	-2.6	2.3	52	0	0	0	0	0.086137
						2014	4	1	91	11.4	1.7	6.55	45.5	38.3362	29.7489	19.1036	2.72824	3.1928
						2014	4	2	92	15.5	5.5	10.5	37.5	48.5445	38.8356	24.5618	4.07675	6.15689
						2014	4	3	93	17.3	8.8	13.05	43	47.2558	32.134	22.0437	3.98849	5.42953
						2014	4	4	94	16.1	7.8	11.95	42.5	55.0421	36.548	25.372	4.427	5.88015
						2014	4	5	95	18.7	11	14.85	59.5	54.2116	33.3943	24.069	4.60902	5.47243
						2014	4	6	96	20.1	13.1	16.6	55	54.0288	30.2561	22.8715	4.61446	5.26751
						2014	4	7	97	21.3	15.3	18.3	45.5	58.7499	28.1999	23.0252	4.87503	5.49193
						2014	4	8	98	19	13.6	16.3	34.5	68.1744	29.4513	25.3477	5.06945	6.21947
						2014	4	9	99	16.1	7.6	11.85	41	52.0049	35.3634	24.2591	4.21858	5.78303
						2014	4	10	100	15.3	10.6	12.95	65	47.8557	17.9937	16.5998	2.99375	2.88466
						2014	4	11	101	18.1	9	13.55	66	56.3389	41.0147	27.1925	4.99982	6.3419
						2014	4	12	102	20.6	13.2	16.9	63.5	51.6556	30.5801	22.4829	4.57563	5.36547
						2014	4	13	103	18.1	10	14.05	56.5	21.6288	14.0155	9.84908	1.83981	2.41471
						2014	4	14	104	20.3	10.8	15.55	47.5	45.6207	34.6718	22.498	4.40056	6.00782
						2014	4	15	105	19	10.4	14.7	43.5	38.8465	26.7264	18.2273	3.47434	4.83199
						2014	4	16	106	20.5	12.1	16.3	58	37.514	25.2094	17.3961	3.47917	4.40715
						2014	4	17	107	20.9	13.6	17.25	67.5	30.0996	17.5782	13.0119	2.67484	3.26126
						2014	4	18	108	24.2	14.8	19.5	70	49.2837	37.0613	24.1762	5.28888	6.86
						2014	4	19	109	24	14.4	19.2	64	46.5953	35.7852	23.0993	5.01265	6.59162
						2014	4	20	110	21	10.5	15.75	67	3.71166	3.1178	1.92435	0.378655	0.826896
						2014	4	21	111	21	11.9	16.45	63.5	50.2647	36.5927	24.2607	4.87341	6.27226
						2014	4	22	112	19.9	11.1	15.5	79	60.0796	42.296	28.516	5.5693	6.99262
						2014	4	23	113	22	13.3	17.65	66.5	58.9982	41.0627	27.8431	5.78898	7.23155
						2014	4	24	114	22.6	13.9	18.25	42.5	60.3103	41.976	28.4624	6.0179	8.30119
						2014	4	25	115	23.6	17.7	20.65	31.5	42.7396	20.1731	16.6102	3.74576	5.0542
						2014	4	26	116	26	16.8	21.4	38.5	54.6523	40.2241	26.523	6.09784	8.9788
						2014	4	27	117	23.2	14.7	18.95	41	60.8632	41.3869	28.3912	6.11941	8.49022
						2014	4	28	118	24.9	16.9	20.9	38.5	36.6622	23.4638	16.5914	3.76584	5.36943
						2014	4	29	119	20.6	14.2	17.4	36.5	65.6396	33.6075	26.569	5.48512	7.08911
						2014	4	30	120	20.1	12.7	16.4	31	67.206	39.786	29.2512	5.8673	8.6205
						2014	5	1	121	22.4	15.9	19.15	28.5	0	0	0	0	0.474908
						2014	5	2	122	21	13.7	17.35	24	0	0	0	0	0.476548
						2014	5	3	123	22.2	14.9	18.55	23	0	0	0	0	0.496401
						2014	5	4	124	25.7	16.5	21.1	30.5	0	0	0	0	0.484182
						2014	5	5	125	27.9	20	23.95	36.5	0	0	0	0	0.47522
						2014	5	6	126	30.3	22.2	26.25	40.5	0	0	0	0	0.468255
						2014	5	7	127	28.3	20.5	24.4	50.5	0	0	0	0	0.401238
						2014	5	8	128	30.6	21	25.8	51	0	0	0	0	0.409701
						2014	5	9	129	23.9	14.8	19.35	62.5	0	0	0	0	0.364974
						2014	5	10	130	22.6	15.1	18.85	59	0	0	0	0	0.360795
						2014	5	11	131	24.3	16.5	20.4	67.5	0	0	0	0	0.373366
						2014	5	12	132	20.4	15.7	18.05	68	0	0	0	0	0.353846
						2014	5	13	133	21.6	13.2	17.4	76	0	0	0	0	0.347946
						2014	5	14	134	20.5	12.6	16.55	71.5	0	0	0	0	0.339865
						2014	5	15	135	26.3	13.2	19.75	66	0	0	0	0	0.368231
						2014	5	16	136	28.3	19.7	24	65	0	0	0	0	0.398708
						2014	5	17	137	29.9	22.6	26.25	59.5	0	0	0	0	0.4123
						2014	5	18	138	24.6	19	21.8	54.5	0	0	0	0	0.38381
						2014	5	19	139	23	13.5	18.25	56	0	0	0	0	0.355614
						2014	5	20	140	22.9	11.7	17.3	49	0	0	0	0	0.351975
						2014	5	21	141	25.1	15.6	20.35	68.5	0	0	0	0	0.372978
						2014	5	22	142	23	15.5	19.25	57.5	0	0	0	0	0.364148
						2014	5	23	143	28	16	22	47.5	0	0	0	0	0.398996
						2014	5	24	144	23.5	16.4	19.95	41.5	0	0	0	0	0.414739
						2014	5	25	145	24.9	15.7	20.3	40.5	0	0	0	0	0.423154
						2014	5	26	146	26.3	19.2	22.75	46	0	0	0	0	0.412768
						2014	5	27	147	27.2	18.1	22.65	53.5	0	0	0	0	0.389773
						2014	5	28	148	28	17.9	22.95	55	0	0	0	0	0.391813
						2014	5	29	149	30.6	20.5	25.55	48.5	0	0	0	0	0.416981
						2014	5	30	150	32.2	23.3	27.75	34.5	0	0	0	0	0.513692
						2014	5	31	151	34.1	24.9	29.5	34.5	0	0	0	0	0.524612
						2014	6	1	152	28.3	20.6	24.45	34.5	69.6042	42.8762	30.903	7.65765	10.5523
						2014	6	2	153	25.2	17.3	21.25	36	65.5621	41.4353	29.484	6.75267	9.49151
						2014	6	3	154	24.9	14.4	19.65	29.5	50.3279	42.2754	26.093	5.73117	10.0836
						2014	6	4	155	26.7	13.3	20	29	52.8079	56.61	30.9294	6.85695	13.5178
						2014	6	5	156	25.8	17.3	21.55	29	19.7306	13.4168	9.20386	2.12414	3.68458
						2014	6	6	157	27.2	15	21.1	27.5	49.5827	48.3927	27.7096	6.3219	12.0871
						2014	6	7	158	27.1	17	22.05	43	39.2467	31.7114	19.9565	4.66424	6.85976
						2014	6	8	159	30.3	19.5	24.9	38.5	57.6936	49.8473	30.3361	7.59723	11.6984
						2014	6	9	160	31.5	21.5	26.5	29	60.878	48.7024	30.8021	8.00298	13.0708
						2014	6	10	161	34.3	24.3	29.3	40.5	51.7445	41.3956	26.1809	7.23225	10.1261
						2014	6	11	162	30.8	22.7	26.75	37.5	68.0661	44.1068	30.9951	8.09858	10.8143
						2014	6	12	163	29.3	19	24.15	34.5	45.6267	37.5964	23.4292	5.76444	9.26951
						2014	6	13	164	27.2	16.5	21.85	28	58.0521	49.6926	30.383	7.06548	12.5098
						2014	6	14	165	30.5	19.3	24.9	26	57.5383	51.5544	30.8096	7.71582	13.9361
						2014	6	15	166	32.3	23.1	27.7	22.5	57.0671	42.0014	27.6949	7.39059	12.3502
						2014	6	16	167	33.7	23.5	28.6	20.5	55.4578	45.2535	28.3389	7.71203	13.6844
						2014	6	17	168	33.4	23.9	28.65	22.5	58.3264	44.3281	28.7639	7.83611	13.1551
						2014	6	18	169	34.6	23.2	28.9	28	55.5022	50.618	29.9835	8.21235	14.1371
						2014	6	19	170	35.3	23.8	29.55	52	55.816	51.3507	30.285	8.41038	10.9886
						2014	6	20	171	35.2	25.3	30.25	32.5	60.659	48.0419	30.5375	8.60586	12.9865
						2014	6	21	172	30.3	23.5	26.9	33	70.9453	38.5942	29.6004	7.76021	10.0635
						2014	6	22	173	31.8	20.4	26.1	28	54.1761	49.4086	29.2671	7.53551	13.3243
						2014	6	23	174	32.6	21.7	27.15	23.5	58.5911	51.0914	30.9503	8.15948	14.6394
						2014	6	24	175	34.5	22.2	28.35	23.5	54.4881	53.6163	30.5756	8.27588	15.569
						2014	6	25	176	34.3	24.6	29.45	22.5	0	0	0	0	0.597899
						2014	6	26	177	33.5	23.8	28.65	23.5	11.2389	8.72138	5.60053	1.52575	3.03258
						2014	6	27	178	34.3	23	28.65	23	9.945	8.99028	5.34889	1.45719	3.12411
						2014	6	28	179	36.2	24.4	30.3	24.5	38.9128	36.7337	21.3872	6.03347	10.9827
						2014	6	29	180	35.2	24.9	30.05	23	51.7453	42.6382	26.5711	7.45693	12.8164
						2014	6	30	181	34.6	25.8	30.2	20	61.0059	42.9481	28.9556	8.15159	13.3264
						2014	7	1	182	36.2	27.8	32	20	64.6753	43.4618	29.9915	8.75982	13.7348
						2014	7	2	183	36.2	27.9	32.05	27.5	64.5551	42.8646	29.757	8.70006	12.5443
						2014	7	3	184	37.1	26.6	31.85	25	56.5342	47.4887	29.3107	8.53519	14.1802
						2014	7	4	185	36.7	27.9	32.3	24	53.9866	38.0066	25.624	7.52927	11.6408
						2014	7	5	186	36.7	28.8	32.75	22	54.4911	34.4384	24.5053	7.26521	10.8732
						2014	7	6	187	34.7	26	30.35	20.5	62.0413	43.1807	29.2793	8.26846	13.3501
						2014	7	7	188	34.1	24	29.05	17	56.9676	46.0298	28.9673	7.95951	14.4752
						2014	7	8	189	34.9	24.5	29.7	18.5	50.6277	42.1223	26.1231	7.27757	13.2045
						2014	7	9	190	34.9	23.3	29.1	21.5	54.4323	50.5132	29.6624	8.15919	15.1414
						2014	7	10	191	36	25.7	30.85	25.5	57.3446	47.252	29.4463	8.40199	13.894
						2014	7	11	192	36.8	27.4	32.1	21.5	59.7625	44.9414	29.3165	8.57988	13.9821
						2014	7	12	193	36.2	29.5	32.85	23.5	68.2042	36.5575	28.2468	8.39105	11.3388
						2014	7	13	194	34.5	27.3	30.9	25	69.4233	39.9878	29.8052	8.51311	11.9175
						2014	7	14	195	37	22.6	29.8	25	0	0	0	0	0.584887
						2014	7	15	196	36.2	27.8	32	21.5	61.4257	41.2781	28.4846	8.31969	12.8802
						2014	7	16	197	36.2	28.3	32.25	17.5	62.7085	39.6318	28.2007	8.27813	12.9264
						2014	7	17	198	35.8	26.6	31.2	20.5	61.5112	45.2722	29.8516	8.57891	14.0939
						2014	7	18	199	35.5	25.5	30.5	22.5	58.9507	47.1605	29.8269	8.44936	14.255
						2014	7	19	200	34.6	26.3	30.45	27.5	62.7538	41.6685	28.9267	8.18587	12.0094
						2014	7	20	201	31.3	19.3	25.3	26	53.3437	51.21	29.5661	7.47376	13.9294
						2014	7	21	202	31.5	19.1	25.3	25.5	42.9187	42.5754	24.1812	6.11256	11.735
						2014	7	22	203	33.4	20.5	26.95	23.5	50.0583	51.6602	28.7668	7.55009	14.757
						2014	7	23	204	35.8	26.1	30.95	21.5	55.0643	42.7299	27.4395	7.84547	13.1688
						2014	7	24	205	36.7	28.9	32.8	18.5	65.1593	40.6594	29.1168	8.64097	13.1858
						2014	7	25	206	36.2	29.3	32.75	19	66.8827	36.9193	28.1098	8.33389	11.9671
						2014	7	26	207	33.5	25.2	29.35	24	61.028	40.5226	28.1312	7.77925	11.9891
						2014	7	27	208	30.8	23.1	26.95	25	65.6348	40.4311	29.1407	7.64823	11.4926
						2014	7	28	209	35.1	23.8	29.45	18	53.5481	48.4075	28.8007	7.98129	15.1129
						2014	7	29	210	37.4	25.7	31.55	23	52.2078	48.8665	28.5725	8.26996	14.8359
						2014	7	30	211	36.5	27.5	32	19.5	58.1313	41.8545	27.903	8.14983	13.3164
						2014	7	31	212	37.3	26.3	31.8	19	51.6412	45.4443	27.4039	7.97191	14.4468
						2014	8	1	213	37.2	28.1	32.65	20.5	59.6518	43.4265	28.7915	8.51909	13.7428
						2014	8	2	214	37.2	29.4	33.3	16	62.5995	39.0621	27.9729	8.38353	13.0673
						2014	8	3	215	33.7	26.9	30.3	17.5	69.8364	37.991	29.1378	8.21995	12.1694
						2014	8	4	216	32.7	22.3	27.5	20.5	54.2501	45.136	27.9922	7.43709	13.4652
						2014	8	5	217	31.8	17.9	24.85	19	42.8223	47.6183	25.5445	6.38975	13.8648
						2014	8	6	218	31.5	20.6	26.05	20	52.7494	45.9975	27.8645	7.1662	13.5142
						2014	8	7	219	33.4	23.8	28.6	22	57.4576	44.1275	28.4842	7.75157	13.1576
						2014	8	8	220	33.8	26.8	30.3	20.5	67.3379	37.7093	28.5055	8.04159	11.7302
						2014	8	9	221	34.2	25.1	29.65	24.5	58.5978	42.6592	28.2828	7.87093	12.5677
						2014	8	10	222	34.2	26.9	30.55	23.5	64.609	37.7317	27.9302	7.92025	11.4139
						2014	8	11	223	35.2	26.5	30.85	25	56.4297	39.2751	26.631	7.59868	11.7095
						2014	8	12	224	35.9	27.7	31.8	21.5	56.8974	37.3247	26.0687	7.58348	11.6826
						2014	8	13	225	37.2	27.3	32.25	22	52.3271	41.443	26.3429	7.73279	12.8955
						2014	8	14	226	37.2	30	33.6	20.5	61.0059	35.1394	26.1914	7.89567	11.3416
						2014	8	15	227	37.3	29.6	33.45	19.5	0	0	0	0	0.642212
						2014	8	16	228	37.2	30.1	33.65	18	62.1215	35.285	26.4844	7.9918	11.6774
						2014	8	17	229	37.2	29.6	33.4	19	52.4882	31.9129	23.152	6.95227	10.4955
						2014	8	18	230	37.2	29.8	33.5	22.5	52.53	31.0978	22.8635	6.87905	9.89804
						2014	8	19	231	35.5	29.9	32.7	19.5	54.6557	24.4858	20.6942	6.12927	8.10858
						2014	8	20	232	35.1	26.1	30.6	25	53.475	38.502	25.668	7.28627	11.46
						2014	8	21	233	32.9	24.2	28.55	24	58.52	40.7299	27.6175	7.5076	11.9343
						2014	8	22	234	35.9	26.4	31.15	23	49.3395	37.498	24.3319	6.98549	11.4785
						2014	8	23	235	37.2	27.9	32.55	23	51.2547	38.1335	25.009	7.38521	11.8281
						2014	8	24	236	37.2	27.9	32.55	24.5	41.9039	31.1765	20.4464	6.03787	9.63108
						2014	8	25	237	37.2	29.1	33.15	29	55.129	35.7236	25.104	7.50162	10.4916
						2014	8	26	238	37.2	31	34.1	23.5	48.6459	24.1284	19.3804	5.89926	7.78161
						2014	8	27	239	37.2	31.3	34.25	22.5	51.5081	24.3118	20.018	6.11097	7.92787
						2014	8	28	240	37.2	29.4	33.3	23.5	55.0239	34.3349	24.5877	7.36898	10.7321
						2014	8	29	241	35.9	27.3	31.6	22	55.3344	38.0701	25.9636	7.52246	11.8191
						2014	8	30	242	36.2	27.2	31.7	21	51.6894	37.2164	24.8109	7.20304	11.6978
						2014	8	31	243	35.6	27.3	31.45	18.5	52.219	34.6734	24.0706	6.95284	11.1887
						2014	9	1	244	37	26.8	31.9	21.5	49.4108	40.3192	25.2489	7.3598	12.5828
						2014	9	2	245	37	28.6	32.8	22.5	51.519	34.6208	23.8906	7.08999	10.877
						2014	9	3	246	33.1	24.9	29	20.5	47.884	31.4119	21.939	6.02187	9.72975
						2014	9	4	247	32	24.1	28.05	23	55.0162	34.7703	24.7414	6.65322	10.317
						2014	9	5	248	37	25.2	31.1	25.5	0	0	0	0	0.590067
						2014	9	6	249	31.4	24.5	27.95	20.5	58.1866	32.119	24.455	6.56186	9.80948
						2014	9	7	250	29.1	21.9	25.5	19	57.9056	33.3536	24.8603	6.31339	9.98178
						2014	9	8	251	29	21.4	25.2	17.5	54.2614	32.9909	23.9341	6.03607	9.98236
						2014	9	9	252	28.9	21.1	25	20	54.6453	34.0987	24.4186	6.1296	10.0165
						2014	9	10	253	29.5	21.5	25.5	25.5	53.9126	34.5041	24.3981	6.196	9.64254
						2014	9	11	254	29.3	21.5	25.4	21.5	54.6622	34.1092	24.4261	6.1888	9.92776
						2014	9	12	255	29.7	22.9	26.3	19.5	58.4975	31.8227	24.4069	6.31275	9.61163
						2014	9	13	256	32.1	23.4	27.75	17.5	48.9133	34.0437	23.0838	6.16685	10.647
						2014	9	14	257	30.1	23.6	26.85	17.5	47.7605	24.8354	19.4825	5.10193	7.8415
						2014	9	15	258	28.9	22.3	25.6	17	56.3652	29.7608	23.1688	5.8974	9.16084
						2014	9	16	259	29.3	21.1	25.2	20.5	48.3072	31.6895	22.1329	5.58181	9.3307
						2014	9	17	260	27.7	21.1	24.4	24	54.6804	28.8712	22.4762	5.56294	8.15168
						2014	9	18	261	28.5	19.8	24.15	35.5	38.4399	26.7542	18.141	4.46336	6.6583
						2014	9	19	262	28.2	21	24.6	38.5	51.6396	29.7444	22.1702	5.51319	7.13769
						2014	9	20	263	26.9	19.4	23.15	36.5	39.7212	23.8327	17.4049	4.18017	5.81684
						2014	9	21	264	26.6	17.5	22.05	32	47.0585	34.2586	22.7132	5.30854	8.43052
						2014	9	22	265	25	18.3	21.65	52.5	49.5303	26.5482	20.513	4.74617	5.24435
						2014	9	23	266	27.3	17.5	22.4	52.5	43.1089	33.7974	21.5924	5.0909	6.66316
						2014	9	24	267	25.7	17.8	21.75	42.5	39.8523	25.1867	17.922	4.15721	5.54062
						2014	9	25	268	26.5	17.5	22	31.5	43.4166	31.2599	20.84	4.86461	7.77182
						2014	9	26	269	26.5	17	21.75	31	44.6724	33.951	22.0303	5.11017	8.40722
						2014	9	27	270	24.5	18.8	21.65	36.5	54.5293	24.8654	20.8299	4.8195	5.88815
						2014	9	28	271	22.7	14.1	18.4	44.5	13.1701	9.06106	6.17959	1.31201	2.05399
						2014	9	29	272	21.4	13.7	17.55	42	41.8113	25.7558	18.5635	3.84873	5.18614
						2014	9	30	273	23.2	12.6	17.9	46.5	40.3322	34.2017	21.0099	4.39907	6.42711
						2014	10	1	274	25	14.6	19.8	43.5	37.431	31.1426	19.3138	4.25916	6.40582
						2014	10	2	275	27	18.3	22.65	34.5	36.2068	25.1999	17.0871	4.05374	6.21635
						2014	10	3	276	27.4	18.9	23.15	30	38.8401	26.4113	18.118	4.35143	6.8933
						2014	10	4	277	26	18.9	22.45	22.5	36.2786	20.6063	15.4668	3.65118	5.87472
						2014	10	5	278	26.6	18.4	22.5	26.5	41.1325	26.9829	18.8457	4.45436	7.22296
						2014	10	6	279	26.9	18.3	22.6	27	41.7922	28.753	19.6094	4.64637	7.63526
						2014	10	7	280	27.2	19.7	23.45	22	43.7497	26.2498	19.1702	4.63787	7.50125
						2014	10	8	281	27.1	18.5	22.8	26	40.6196	27.9463	19.0592	4.53836	7.54191
						2014	10	9	282	27.7	21	24.35	28	43.5088	23.3207	18.0192	4.45452	6.40653
						2014	10	10	283	28.2	21	24.6	22	36.0414	20.7598	15.4735	3.84788	6.16046
						2014	10	11	284	25.5	20.1	22.8	21	25.5889	11.0544	9.51412	2.26549	3.47603
						2014	10	12	285	24.9	18.2	21.55	18	25.8004	13.829	10.6852	2.46602	4.23974
						2014	10	13	286	24.1	16.1	20.1	50.5	30.0405	19.2259	13.5948	3.02189	3.78403
						2014	10	14	287	20.6	15.2	17.9	56	13.0135	5.62183	4.8385	1.01309	1.3007
						2014	10	15	288	21.7	15.2	18.45	39	38.4139	19.9752	15.6698	3.33151	4.36573
						2014	10	16	289	18.7	12.4	15.55	40	27.6182	13.9196	11.0914	2.16945	2.88703
						2014	10	17	290	18.2	11.5	14.85	33.5	28.8253	15.4503	11.938	2.28603	3.34272
						2014	10	18	291	18.5	11.2	14.85	31.5	27.3567	15.9763	11.8262	2.26462	3.52256
						2014	10	19	292	14.5	11	12.75	32	13.9878	3.91658	4.187	0.750209	1.07553
						2014	10	20	293	13.5	6.6	10.05	43.5	12.8304	7.08239	5.39244	0.880802	1.24671
						2014	10	21	294	18.1	11.4	14.75	43	25.487	13.661	10.5554	2.01509	2.66298
						2014	10	22	295	17.8	9.7	13.75	41.5	35.5433	23.032	16.1853	2.99493	4.17689
						2014	10	23	296	20	11.3	15.65	35.5	23.101	16.0783	10.9021	2.13882	3.47151
						2014	10	24	297	20.7	12.7	16.7	31	36.0404	23.0659	16.31	3.30021	5.22337
						2014	10	25	298	21.2	14.4	17.8	29.5	38.2454	20.8055	15.9571	3.33174	4.97976
						2014	10	26	299	21.4	13.7	17.55	30.5	25.2994	15.5844	11.2325	2.3288	3.77709
						2014	10	27	300	22.8	15.4	19.1	29	37.1123	21.9705	16.153	3.49581	5.43111
						2014	10	28	301	19	13.2	16.1	32	24.1236	11.1933	9.29556	1.84818	2.6799
						2014	10	29	302	22.5	14.6	18.55	32	32.4021	20.4781	14.5716	3.10656	4.86288
						2014	10	30	303	22.1	15.6	18.85	34.5	29.1206	15.1427	11.8789	2.5534	3.6336
						2014	10	31	304	15.9	8.9	12.4	30	3.96524	2.22054	1.67857	0.297313	0.777515
						2014	11	1	305	13.9	8.2	11.05	62	25.347	11.5583	9.68244	1.63832	1.79471
						2014	11	2	306	13.9	8.5	11.2	79.5	36.8254	15.9086	13.6919	2.32879	2.38515
						2014	11	3	307	10.8	4.2	7.5	74	36.4258	19.2328	14.9727	2.22172	2.20336
						2014	11	4	308	11	2.5	6.75	76	34.9635	23.7752	16.3096	2.34835	2.48841
						2014	11	5	309	10.9	1.9	6.4	75	32.9709	23.739	15.826	2.24623	2.39462
						2014	11	6	310	14.5	5.4	9.95	75	33.1995	24.1693	16.0241	2.60798	3.24636
						2014	11	7	311	18.8	9.3	14.05	66.5	31.5337	23.9656	15.5509	2.90492	3.90655
						2014	11	8	312	18.4	11.6	15	61	0	0	0	0	0.32395
						2014	11	9	313	17.7	11.6	14.65	66.5	37.0458	18.0784	14.6394	2.78616	3.08919
						2014	11	10	314	17.8	11.7	14.75	69	32.9401	16.0748	13.017	2.48501	2.79188
						2014	11	11	315	18.7	11.5	15.1	62	31.0979	17.9124	13.3511	2.57621	3.11067
						2014	11	12	316	18.5	12	15.25	54.5	32.9759	17.1475	13.4516	2.60743	3.00645
						2014	11	13	317	16.5	11.3	13.9	52.5	34.9643	14.5452	12.757	2.37178	2.48031
						2014	11	14	318	16.9	11.4	14.15	73	25.7078	11.3114	9.64643	1.80761	2.01665
						2014	11	15	319	15.5	12.5	14	67.5	15.2007	3.64817	4.21254	0.785668	0.858746
						2014	11	16	320	16.9	11.5	14.2	58	20.1373	8.69933	7.48719	1.4052	1.62653
						2014	11	17	321	11.5	8.9	10.2	55.5	10.3915	2.16144	2.68094	0.440263	0.533454
						2014	11	18	322	16.4	9.7	13.05	71.5	24.7207	13.2503	10.2381	1.85242	2.21244
						2014	11	19	323	16.7	10.5	13.6	67.5	0	0	0	0	0.308092
						2014	11	20	324	15.1	10.8	12.95	73.5	0	0	0	0	0.30019
						2014	11	21	325	14.1	7.5	10.8	79.5	0	0	0	0	0.271214
						2014	11	22	326	8.1	4.9	6.5	85	0	0	0	0	0.195877
						2014	11	23	327	11.2	3.2	7.2	68.5	0	0	0	0	0.21013
						2014	11	24	328	6.9	4	5.45	70	0	0	0	0	0.172668
						2014	11	25	329	10.1	4.7	7.4	64	0	0	0	0	0.214038
						2014	11	26	330	7.6	5	6.3	68.5	1.48497	0.308874	0.38311	0.0541513	0.219953
						2014	11	27	331	6	1.9	3.95	50	10.7539	3.52728	3.484	0.444432	0.362974
						2014	11	28	332	9.1	2.4	5.75	65	30.6905	16.4501	12.7105	1.75558	1.59266
						2014	11	29	333	8.9	4.1	6.5	93.5	0	0	0	0	0.195877
						2014	11	30	334	10.4	3.8	7.1	79	0	0	0	0	0.208149
						2014	12	1	335	6.1	4.2	5.15	83	9.77718	1.48613	2.1563	0.290242	0.28334
						2014	12	2	336	6.3	4.2	5.25	59	9.68098	1.6264	2.24465	0.30345	0.298689
						2014	12	3	337	7.6	5.6	6.6	46	6.87982	1.10077	1.55673	0.222777	0.319508
						2014	12	4	338	9.7	5.4	7.55	74	34.1766	11.7568	11.3392	1.68589	1.43718
						2014	12	5	339	14.6	5.3	9.95	96.5	16.7657	12.4737	8.18056	1.33142	1.80047
						2014	12	6	340	14.9	9.2	12.05	90	24.1435	11.0095	9.2227	1.61462	1.80898
						2014	12	7	341	13.5	9.7	11.6	89.5	11.7113	3.56025	3.65274	0.629845	0.763846
						2014	12	8	342	13.8	8.2	11	85	13.7875	6.1768	5.22035	0.88178	1.08422
						2014	12	9	343	15	11.9	13.45	83.5	28.8443	7.1534	8.12571	1.48929	1.35467
						2014	12	10	344	11.9	7.5	9.7	94.5	2.27552	0.800985	0.763709	0.123177	0.351951
						2014	12	11	345	12.2	5.9	9.05	94	28.6993	14.4645	11.5256	1.81499	1.93112
						2014	12	12	346	12.2	8.6	10.4	79.5	17.1905	4.95087	5.21868	0.863133	0.893692
						2014	12	13	347	12	5.9	8.95	78	2.171	1.05945	0.857916	0.134597	0.364849
						2014	12	14	348	8.5	6.6	7.55	75.5	6.16627	0.937272	1.35994	0.202192	0.314205
						2014	12	15	349	9.8	6.3	8.05	65	11.8057	3.30559	3.53383	0.535765	0.584152
						2014	12	16	350	11	5.4	8.2	57.5	29.0026	12.9932	10.9812	1.67453	1.65265
						2014	12	17	351	11.9	6.7	9.3	62	29.0646	12.0909	10.6044	1.68548	1.68245
						2014	12	18	352	8.6	5.9	7.25	63.5	19.1412	4.1345	5.03236	0.739345	0.628745
						2014	12	19	353	6.9	4.1	5.5	62	7.10159	1.59076	1.90132	0.259823	0.306131
						2014	12	20	354	10.1	5.1	7.6	65.5	17.7827	7.1131	6.36215	0.947775	0.959402
						2014	12	21	355	8.8	3.7	6.25	63	31.974	13.0454	11.5532	1.62961	1.37999
						2014	12	22	356	6.6	2.5	4.55	54.5	9.28835	3.04658	3.0092	0.394454	0.370596
						2014	12	23	357	4.2	-0.5	1.85	63	27.7905	10.4492	9.63973	1.11095	0.42678
						2014	12	24	358	9	0.3	4.65	88.5	24.4948	17.0484	11.5599	1.52208	1.40397
						2014	12	25	359	9.5	2.9	6.2	63.5	27.4507	14.494	11.2835	1.58827	1.50351
						2014	12	26	360	10.2	4.5	7.35	62	29.8224	13.599	11.392	1.68037	1.59944
						2014	12	27	361	7.2	4.3	5.75	65.5	11.0933	2.57365	3.0226	0.417483	0.400624
						2014	12	28	362	8.5	4.2	6.35	63	19.8293	6.82129	6.57903	0.931853	0.821633
						2014	12	29	363	9.6	5.5	7.55	54.5	24.5062	8.03802	7.93939	1.18041	1.0512
						2014	12	30	364	11.7	6.1	8.9	63	29.0778	13.0269	11.0097	1.72407	1.74508
						2014	12	31	365	11.2	5.6	8.4	88.5	24.6125	11.0264	9.31901	1.43199	1.45962
																	1190.96	1800.11
																	ETo-HS	ETo-TURC (Ousman Couly (2016)

## Sheet: 2015
	MARDİN					year	month	day	DOY	Tmax	Tmin	Tmean	Rhmean	Ra	Rs=0.16(Tmax-Tmin)^0.5*Ra	Rs=from meteorological station	ETo-HS	ETo-TURC (Ousman Couly (2016)
	DOY	246					#	#		°C	°C	°C	%	MJ m-2 day-1*(0.408 mm day-1)
	φ (-)	37.31	0.651182			2015	1	1	1	8.1	5.9	7	60	12.8159	2.25559	3.04144	0.442383	0.428633
	tan(φ)		0.762072			2015	1	2	2	8.8	5.3	7.05	61	25.5081	7.14228	7.63541	1.11283	0.915063
	sin(φ)		0.606127			2015	1	3	3	5.6	3	4.3	60.5	4.36078	0.907042	1.12505	0.145825	0.206998
	cos(φ)		0.795368			2015	1	4	4	7.7	1.8	4.75	60	25.2434	11.9149	9.81056	1.2975	1.04416
	dr	0.984766		(1+0.033*cos(2*3.14/365*DOY))		2015	1	5	5	4.7	1.9	3.3	81.5	1.4982	0.335597	0.401115	0.0496385	0.135595
	δ	0.120494		(0.409*sin(2*3.14/365*DOY-1.39))		2015	1	6	6	7.6	3.2	5.4	95.5	29.4359	10.3614	9.87923	1.34425	1.02175
	tan(δ)	0.121081				2015	1	7	7	5.8	-0.2	2.8	84.5	5.19424	2.49324	2.03572	0.245954	0.223497
	sin(δ)	0.120203				2015	1	8	8	0.6	-3.2	-1.3	70	9.17818	2.79017	2.86265	0.277026	-0.143555
	cos(δ)	0.992749				2015	1	9	9	-0.2	-5.4	-2.8	82.5	23.8615	9.9264	8.70603	0.765913	-0.854937
	X	0.991486				2015	1	10	10	1.1	-6.2	-2.55	66	28.8105	16.8253	12.4547	1.11396	-1.20101		-
	ωs (eq. 25)	1.49187		(acos{(-1*tan(-0.35)*tan(0.409*sin(2*3.14/365*DOY-1.39))))		2015	1	11	11	2.2	-3.5	-0.65	69.5	22.7329	10.3662	8.68384	0.873462	-0.174907
	sin ωs	0.996887				2015	1	12	12	4.2	-1.9	1.15	81.5	30.1789	14.7273	11.9258	1.32546	0.371231
	sin φ*sin δ	-0.0728584		(sin(0.35)*sin(0.409*sin(2*3.14/365*DOY-1.39)))		2015	1	13	13	7.3	-0.9	3.2	71.5	27.782	18.225	12.7289	1.56775	1.10728
	cos φ*cos δ	0.789601		(cos(0.35)*cos(0.409*sin(2*3.14/365*DOY-1.39))		2015	1	14	14	9.3	2.4	5.85	69.5	30.6011	16.8918	12.8612	1.78394	1.65101
	Gsc	0.082				2015	1	15	15	7.2	1.6	4.4	66.5	7.36263	3.29846	2.7877	0.362968	0.378858
						2015	1	16	16	4	-0.2	1.9	55.5	1.86811	0.627685	0.612558	0.0707753	0.094717
	Ra	25.1244				2015	1	17	17	4.4	-0.4	2	57	36.8519	14.1511	12.9182	1.50015	0.592323
						2015	1	18	18	4.7	-0.2	2.25	53.5	38.1361	14.9493	13.5068	1.58831	0.688982
						2015	1	19	19	10.9	2.7	6.8	53	19.073	12.5119	8.73869	1.26081	1.41196
						2015	1	20	20	9.5	3.7	6.6	77	32.4556	15.0594	12.5062	1.78971	1.62443
						2015	1	21	21	11.7	5.9	8.8	87.5	23.3771	10.847	9.00791	1.40532	1.48286
						2015	1	22	22	8.5	4.1	6.3	77.5	39.4474	13.8855	13.2393	1.87133	1.46479
						2015	1	23	23	12.3	3.8	8.05	72.5	27.0728	18.4095	12.6288	1.91466	2.21937
						2015	1	24	24	11.9	5	8.45	77.5	31.8315	17.571	13.3783	2.05967	2.19624
						2015	1	25	25	11.6	6.9	9.25	81	31.7968	11.9556	11.0294	1.74979	1.66085
						2015	1	26	26	12.7	7.9	10.3	77.5	35.0232	13.4489	12.2771	2.02335	1.9611
						2015	1	27	27	12.6	4.5	8.55	80	24.3008	15.7469	11.0658	1.71014	2.00751
						2015	1	28	28	8.8	4.1	6.45	85.5	9.17256	3.44888	3.1817	0.452521	0.516317
						2015	1	29	29	9.2	3.3	6.25	69	31.4619	14.85	12.2273	1.7247	1.54453
						2015	1	30	30	9.3	3	6.15	67.5	19.3796	9.76733	7.7828	1.09322	1.06884
						2015	1	31	31	7.3	2.3	4.8	86.5	23.9947	9.59788	8.58461	1.13788	0.878362
						2015	2	1	32	10.7	4.3	7.5	85.5	32.6326	16.7079	13.2087	1.95997	1.94245
						2015	2	2	33	13.3	6	9.65	70	0	0	0	0	0.25364
						2015	2	3	34	13	8.1	10.55	82.5	37.3298	14.6333	13.2213	2.19834	2.14065
						2015	2	4	35	9.9	4	6.95	74.5	25.3964	11.9871	9.87002	1.43272	1.38174
						2015	2	5	36	10.8	3.1	6.95	72.5	32.956	20.3009	14.6319	2.12395	2.19778
						2015	2	6	37	12.4	4.3	8.35	82	34.2643	22.2033	15.6029	2.39301	2.69307
						2015	2	7	38	12.1	6.4	9.25	83.5	33.5611	15.3039	12.8202	2.0339	2.05678
						2015	2	8	39	11	6.6	8.8	87	28.2968	9.96049	9.49695	1.48161	1.38125
						2015	2	9	40	7.5	4	5.75	79	2.36953	0.663469	0.709278	0.097966	0.236533
						2015	2	10	41	7.2	3.1	5.15	64	8.21955	2.69601	2.66293	0.358435	0.3792
						2015	2	11	42	8.5	3.8	6.15	78	35.488	13.3435	12.3098	1.72911	1.3912
						2015	2	12	43	5.9	2	3.95	69	26.575	8.2914	8.39703	1.07116	0.670819
						2015	2	13	44	6.8	2.2	4.5	66.5	15.3418	5.6458	5.26473	0.688572	0.553407
						2015	2	14	45	5.3	1.7	3.5	62.5	17.665	5.08751	5.36271	0.669934	0.420951
						2015	2	15	46	9.1	0.8	4.95	64.5	34.6982	23.0396	15.9943	2.1341	1.9329
						2015	2	16	47	6.2	1.9	4.05	85	10.8542	3.73384	3.60124	0.4615	0.383823
						2015	2	17	48	4.2	1.5	2.85	79	6.12347	1.32267	1.6099	0.194979	0.168913
						2015	2	18	49	7.7	0.3	4	88	19.2598	11.4018	8.38279	1.0718	0.880519
						2015	2	19	50	6.5	3.9	5.2	75.5	14.9406	3.10764	3.85455	0.51996	0.414782
						2015	2	20	51	4.3	-1.4	1.45	81.5	11.0968	5.06014	4.23892	0.478579	0.195379
						2015	2	21	52	3.2	-1.7	0.75	71	19.4209	7.613	6.8784	0.748341	0.143235
						2015	2	22	53	8.7	-0.3	4.2	75	39.882	28.7151	19.1434	2.47007	2.08897
						2015	2	23	54	10.4	3.2	6.8	74.5	43.6649	25.151	18.7465	2.70472	2.63413
						2015	2	24	55	9.1	5	7.05	71.5	29.7054	9.74337	9.62382	1.40263	1.17287
						2015	2	25	56	6.8	1.5	4.15	54.5	5.44251	2.30762	2.00474	0.258083	0.295433
						2015	2	26	57	10.5	2	6.25	56	42.075	28.611	19.627	2.76845	2.79921
						2015	2	27	58	14.7	5.5	10.1	58	32.1429	23.6572	15.5991	2.55253	3.21173
						2015	2	28	59	13.3	7.7	10.5	67	32.7326	14.6642	12.3935	2.05707	2.13863
						2015	3	1	60	13	6.8	9.9	63	38.0501	18.8728	15.159	2.46274	2.58373
						2015	3	2	61	12.5	5.8	9.15	65	25.2504	13.5342	10.4575	1.65292	1.83512
						2015	3	3	62	8	5.3	6.65	66.5	24.0113	5.18645	6.31274	0.905242	0.692859
						2015	3	4	63	9.2	3.1	6.15	57.5	24.0495	11.7361	9.50365	1.33495	1.24631
						2015	3	5	64	7.6	0.2	3.9	59.5	49.09	29.0613	21.3663	2.71929	1.99269
						2015	3	6	65	12.3	2	7.15	39.5	41.2195	33.9649	21.1661	3.09728	4.14912
						2015	3	7	66	14.9	6.7	10.8	31.5	41.5392	27.2497	19.032	3.19241	4.81356
						2015	3	8	67	16.9	9.3	13.1	45.5	40.1016	24.3818	17.6884	3.20564	4.07163
						2015	3	9	68	17.5	11	14.25	45.5	50.9629	26.5007	20.7889	3.90775	4.59551
						2015	3	10	69	16.4	9.6	13	46.5	39.1355	21.2897	16.3285	2.94961	3.53326
						2015	3	11	70	16.4	10.8	13.6	57	46.195	20.6954	17.4908	3.22112	3.35885
						2015	3	12	71	16.3	4.4	10.35	62	2.83411	2.69807	1.56426	0.258259	0.606017
						2015	3	13	72	13.2	4.6	8.9	63	37.7936	26.002	17.7332	2.77694	3.24292
						2015	3	14	73	14.9	7.4	11.15	49.5	41.5501	24.93	18.2063	3.09128	3.59701
						2015	3	15	74	16.5	7.8	12.15	44	46.3937	32.29	21.8947	3.84594	5.17833
						2015	3	16	75	11.9	4.7	8.3	43	23.9219	13.779	10.2703	1.57214	1.92765
						2015	3	17	76	10.2	4.5	7.35	77.5	28.9948	13.2216	11.0759	1.63374	1.56097
						2015	3	18	77	12.9	5	8.95	58.5	40.5273	25.6133	18.2256	2.85939	3.2093
						2015	3	19	78	11.4	6.4	8.9	60.5	15.4445	6.17779	5.52558	0.865282	0.954428
						2015	3	20	79	10.7	5.4	8.05	50.5	21.2199	8.99723	7.81629	1.18503	1.20035
						2015	3	21	80	9	4	6.5	49	25.2305	10.0922	9.02675	1.28649	1.15804
						2015	3	22	81	7.7	-1	3.35	46	17.1434	11.9318	8.09054	1.00359	0.838897
						2015	3	23	82	11	1.6	6.3	66	46.8998	35.2686	23.0067	3.25192	3.42542
						2015	3	24	83	8.9	4.4	6.65	60	22.6194	8.14299	7.67728	1.10092	0.974379
						2015	3	25	84	8.1	4.8	6.45	52	18.4375	4.8675	5.35894	0.762182	0.648556
						2015	3	26	85	14.7	3.2	8.95	50.5	43.4021	39.9299	23.5494	3.69463	4.86782
						2015	3	27	86	16.3	8.9	12.6	56	52.8244	31.272	22.9917	4.09932	4.72145
						2015	3	28	87	15.9	11.2	13.55	78	34.2242	12.8683	11.8714	2.18277	2.20078
						2015	3	29	88	13.6	8.6	11.1	60.5	5.35647	2.14259	1.91639	0.324825	0.558021
						2015	3	30	89	12.4	7.8	10.1	63.5	56.6687	20.8541	19.4465	3.1821	2.86207
						2015	3	31	90	12.8	6.2	9.5	54	0	0	0	0	0.251227
						2015	4	1	91	15.2	8.8	12	51	0	0	0	0	0.287956
						2015	4	2	92	14.1	9.8	11.95	46	0	0	0	0	0.303704
						2015	4	3	93	13.7	7.4	10.55	47.5	0	0	0	0	0.277083
						2015	4	4	94	14.9	10	12.45	47.5	0	0	0	0	0.304351
						2015	4	5	95	15.2	4.3	9.75	62.5	0	0	0	0	0.255233
						2015	4	6	96	18.2	9.4	13.8	60.5	0	0	0	0	0.310452
						2015	4	7	97	20.4	12.9	16.65	41.5	0	0	0	0	0.382226
						2015	4	8	98	19.2	12.4	15.8	36.5	0	0	0	0	0.396463
						2015	4	9	99	23.4	13.6	18.5	55.5	0	0	0	0	0.357796
						2015	4	10	100	15.2	8.1	11.65	70.5	0	0	0	0	0.283228
						2015	4	11	101	13.6	7.8	10.7	57.5	0	0	0	0	0.269748
						2015	4	12	102	10.6	4.8	7.7	58.5	0	0	0	0	0.219772
						2015	4	13	103	7.6	4.1	5.85	53	0	0	0	0	0.181785
						2015	4	14	104	10.8	5.7	8.25	47	0	0	0	0	0.239753
						2015	4	15	105	14.2	6.4	10.3	44.5	0	0	0	0	0.284494
						2015	4	16	106	15.2	8.2	11.7	64.5	0	0	0	0	0.283911
						2015	4	17	107	19.5	11.4	15.45	72.5	0	0	0	0	0.328737
						2015	4	18	108	19.4	14.1	16.75	65	0	0	0	0	0.341806
						2015	4	19	109	17.7	12.6	15.15	82	0	0	0	0	0.325562
						2015	4	20	110	16.3	8.7	12.5	76	0	0	0	0	0.2945
						2015	4	21	111	18.1	12.6	15.35	67	0	0	0	0	0.327686
						2015	4	22	112	14.4	9.5	11.95	70	0	0	0	0	0.287288
						2015	4	23	113	12.9	6.8	9.85	58.5	0	0	0	0	0.256813
						2015	4	24	114	8.5	2.9	5.7	43	0	0	0	0	0.196248
						2015	4	25	115	16.1	5.6	10.85	27.5	0	0	0	0	0.359353
						2015	4	26	116	17.7	10.2	13.95	37.5	0	0	0	0	0.367951
						2015	4	27	117	20.7	13.2	16.95	39.5	0	0	0	0	0.39528
						2015	4	28	118	23.9	15.8	19.85	38	0	0	0	0	0.432296
						2015	4	29	119	24.1	17	20.55	35	0	0	0	0	0.45478
						2015	4	30	120	23.9	19.9	21.9	29.5	0	0	0	0	0.497137
						2015	5	1	121	24	15.6	19.8	26.5	63.0284	42.3551	29.2278	6.44543	10.4709
						2015	5	2	122	19.9	12.1	16	23.5	58.6529	36.5994	26.2094	5.19567	8.53377
						2015	5	3	123	21.3	12.3	16.8	23	52.0165	37.4519	24.9679	5.06671	8.97377
						2015	5	4	124	25	17.2	21.1	30	59.1082	36.8835	26.4129	6.02605	9.07928
						2015	5	5	125	21	9.9	15.45	36	56.0477	49.7704	29.8772	5.82639	9.78858
						2015	5	6	126	23.1	14.2	18.65	38	62.3209	44.3725	29.7474	6.35937	9.35134
						2015	5	7	127	21.6	11	16.3	47.5	60.5566	51.352	31.5453	6.30894	8.93568
						2015	5	8	128	24.6	16.1	20.35	46	0	0	0	0	0.394291
						2015	5	9	129	26	18.1	22.05	60	0	0	0	0	0.385592
						2015	5	10	130	20.9	14.2	17.55	59	52.9575	28.3852	21.9323	4.54718	5.09372
						2015	5	11	131	22.2	17.3	19.75	67	0	0	0	0	0.368231
						2015	5	12	132	23.4	13.5	18.45	82	31.503	24.9504	15.8595	3.37183	4.62355
						2015	5	13	133	22.7	12.9	17.8	68.5	57.1241	44.7853	28.6123	5.97407	7.88591
						2015	5	14	134	20.6	10.6	15.6	62	49.7841	39.8273	25.189	4.9343	6.62458
						2015	5	15	135	21.9	13	17.45	66.5	54.807	39.0226	26.1608	5.40852	6.85357
						2015	5	16	136	24.6	15.8	20.2	61.5	64.5053	45.4118	30.6166	6.82352	8.45045
						2015	5	17	137	25.9	16.9	21.4	56.5	23.4367	16.8744	11.2496	2.58638	3.45632
						2015	5	18	138	26.3	15.8	21.05	53.5	59.515	49.9926	30.8561	7.03072	9.4276
						2015	5	19	139	28.7	18.2	23.45	54	58.7042	49.3115	30.4357	7.36335	9.71816
						2015	5	20	140	30.8	20.8	25.8	43.5	0	0	0	0	0.447745
						2015	5	21	141	32.6	23.2	27.9	53	0	0	0	0	0.421362
						2015	5	22	142	26.8	21.1	23.95	51	30.1315	13.7399	11.5101	2.8184	3.01744
						2015	5	23	143	24.8	12.4	18.6	43.5	0	0	0	0	0.391963
						2015	5	24	144	27.9	19.6	23.75	37.5	47.8499	31.7724	22.0567	5.37501	7.58275
						2015	5	25	145	27.7	19.3	23.5	40	63.8202	42.8872	29.595	7.16863	9.72642
						2015	5	26	146	27.4	17.4	22.4	45.5	57.4321	45.9457	29.0586	6.85124	9.49206
						2015	5	27	147	27.5	20	23.75	50.5	45.4736	27.2841	19.9255	4.85566	5.58109
						2015	5	28	148	30.3	16.9	23.6	54.5	47.2619	50.6647	27.6811	6.72127	9.9988
						2015	5	29	149	25.5	17.7	21.6	48	68.4079	42.6865	30.5684	7.06379	8.42595
						2015	5	30	150	25.7	17.9	21.8	32.5	68.4116	42.6889	30.5701	7.10003	10.2791
						2015	5	31	151	26.3	17.7	22	32	0	0	0	0	0.484299
						2015	6	1	152	31.3	19.1	25.2	36.5	43.5957	42.5494	24.3637	6.14441	10.3477
						2015	6	2	153	27.9	18.3	23.1	35.5	37.358	28.691	18.5199	4.44254	6.98376
						2015	6	3	154	33	20	26.5	32.5	47.2395	49.1291	27.2519	7.08058	12.6736
						2015	6	4	155	29.5	20.7	25.1	37	63.2024	44.4945	29.9982	7.5478	10.718
						2015	6	5	156	31.5	22.9	27.2	36	0	0	0	0	0.501125
						2015	6	6	157	28.7	19.4	24.05	28.5	63.7436	47.4253	31.1027	7.63417	12.3571
						2015	6	7	158	29.2	19.9	24.55	39.5	53.6755	39.9345	26.1901	6.50517	9.29967
						2015	6	8	159	31.1	21.3	26.2	41.5	0	0	0	0	0.462044
						2015	6	9	160	33	22.8	27.9	29	52.4392	42.7904	26.7964	7.18225	11.7627
						2015	6	10	161	29.8	22.4	26.1	40	69.9092	41.3862	30.4278	7.83434	9.78147
						2015	6	11	162	27.3	18.3	22.8	39.5	64.2739	46.2772	30.8515	7.34633	10.4005
						2015	6	12	163	29	19.8	24.4	35.5	63.2824	46.5759	30.7112	7.60112	11.2782
						2015	6	13	164	31.3	20.3	25.8	32	57.4484	50.5546	30.4855	7.79558	12.9736
						2015	6	14	165	31.9	22.1	27	34	60.0398	47.0712	30.0727	7.90166	12.0365
						2015	6	15	166	31.2	21.5	26.35	31.5	57.1573	44.3541	28.4825	7.37525	11.5996
						2015	6	16	167	31.4	19.1	25.25	28	52.0027	51.1706	29.1809	7.36783	13.613
						2015	6	17	168	32.1	21	26.55	29	53.8532	47.8216	28.7073	7.46714	12.8529
						2015	6	18	169	33.3	23.5	28.4	29.5	57.4719	45.0579	28.7865	7.80007	12.3653
						2015	6	19	170	30.9	22.4	26.65	48	61.7823	42.0119	28.82	7.51334	8.9978
						2015	6	20	171	29.8	21.6	25.7	29	63.7174	41.7986	29.1934	7.44805	11.1685
						2015	6	21	172	29.8	19.9	24.85	26	58.8651	46.6211	29.6343	7.4128	12.645
						2015	6	22	173	32.7	21.1	26.9	28.5	51.6387	47.9207	28.14	7.37733	13.0103
						2015	6	23	174	35.6	26	30.8	26.5	55.608	42.7069	27.5672	7.85773	12.4741
						2015	6	24	175	32.6	25.3	28.95	29.5	66.7853	39.0026	28.871	7.91611	10.8484
						2015	6	25	176	32.8	21	26.9	22	49.4996	46.7276	27.2059	7.13244	13.6021
						2015	6	26	177	31	22.3	26.65	25	58.3647	40.6218	27.5442	7.18075	11.4979
						2015	6	27	178	30.4	19.2	24.8	25.5	45.6356	40.8895	24.4362	6.10535	11.2079
						2015	6	28	179	31.6	21.4	26.5	24.5	48.8028	39.8231	24.9382	6.47943	11.3192
						2015	6	29	180	30.8	23.3	27.05	26	64.9887	38.9932	28.4766	7.49064	11.0016
						2015	6	30	181	29.5	21.2	25.35	28	62.7911	41.6933	28.9439	7.32497	11.2071
						2015	7	1	182	34.7	21.9	28.3	29.5	0	0	0	0	0.547466
						2015	7	2	183	36.6	25.6	31.1	31	0	0	0	0	0.555724
						2015	7	3	184	36.6	27.5	32.05	26	0	0	0	0	0.592661
						2015	7	4	185	36.6	28.9	32.75	24	0	0	0	0	0.609423
						2015	7	5	186	35.2	27.7	31.45	21	0	0	0	0	0.620412
						2015	7	6	187	36.7	26.4	31.55	25	54.9604	45.2874	28.2221	8.16853	13.5095
						2015	7	7	188	36.9	26.8	31.85	20	56.0355	45.2767	28.4934	8.29719	14.2606
						2015	7	8	189	36.6	25.5	31.05	24	0	0	0	0	0.599119
						2015	7	9	190	32.8	22.3	27.55	21.5	0	0	0	0	0.590294
						2015	7	10	191	36.2	24.3	30.25	28	0	0	0	0	0.569252
						2015	7	11	192	36.6	26.1	31.35	23.5	0	0	0	0	0.604123
						2015	7	12	193	36.9	26	31.45	25	55.4951	48.3917	29.3149	8.46763	14.3799
						2015	7	13	194	33.4	25.3	29.35	24.5	64.8111	41.9976	29.5129	8.16134	12.3395
						2015	7	14	195	35	25.1	30.05	26	0	0	0	0	0.580347
						2015	7	15	196	37.9	28.4	33.15	23	0	0	0	0	0.618114
						2015	7	16	197	36.6	26.6	31.6	14	47.2436	37.7949	23.9036	6.92561	12.6964
						2015	7	17	198	37.7	26.3	32	31	48.0036	43.7793	25.9326	7.57432	12.3091
						2015	7	18	199	36.2	25	30.6	35.5	52.304	46.8644	28.0068	7.95019	12.2933
						2015	7	19	200	34.4	24.6	29.5	35.5	60.0858	47.1073	30.0957	8.34899	12.2046
						2015	7	20	201	36.2	24	30.1	26	50.2195	49.0142	28.0655	7.88453	14.1984
						2015	7	21	202	37.3	28.7	33	27.5	58.3033	40.1127	27.3566	8.15068	11.8855
						2015	7	22	203	36.9	29.1	33	25.5	0	0	0	0	0.601332
						2015	7	23	204	36.9	27.1	32	24	0	0	0	0	0.604969
						2015	7	24	205	37	29.4	33.2	21	0	0	0	0	0.631155
						2015	7	25	206	36.6	30.9	33.75	18.5	0	0	0	0	0.650392
						2015	7	26	207	35.7	29.7	32.7	22.5	72.4716	34.7863	28.4029	8.41245	10.9155
						2015	7	27	208	35.1	25.5	30.3	27	0	0	0	0	0.575754
						2015	7	28	209	36.6	28.5	32.55	12.5	0	0	0	0	0.681113
						2015	7	29	210	37.9	30.1	34	21	0	0	0	0	0.635811
						2015	7	30	211	37.8	32.7	35.25	18	37.2406	15.1942	13.4562	4.18673	5.47691
						2015	7	31	212	37.1	29.5	33.3	14	0	0	0	0	0.676414
						2015	8	1	213	36.3	28.4	32.35	23	0	0	0	0	0.613389
						2015	8	2	214	35.2	26	30.6	19.5	0	0	0	0	0.624213
						2015	8	3	215	37.7	29.8	33.75	19.5	55.9556	35.364	25.1639	7.60806	11.5406
						2015	8	4	216	37.7	30.2	33.95	22	52.9068	31.7441	23.1826	7.03623	10.1843
						2015	8	5	217	37.7	31.3	34.5	16.5	0	0	0	0	0.667674
						2015	8	6	218	37.7	29.6	33.65	20	56.5965	36.6745	25.7722	7.77688	11.8741
						2015	8	7	219	35.1	29	32.05	26	0	0	0	0	0.592661
						2015	8	8	220	35.2	24.4	29.8	21.5	0	0	0	0	0.606435
						2015	8	9	221	37.7	29.4	33.55	24	57.6508	38.2802	26.5745	8.00337	11.8604
						2015	8	10	222	37.7	28.1	32.9	23.5	50.7338	38.9636	25.1509	7.47876	12.0504
						2015	8	11	223	35.3	27	31.15	31	56.9478	37.8133	26.2504	7.53627	10.6157
						2015	8	12	224	33.9	24.9	29.4	26.5	57.9594	41.7308	27.8205	7.7015	12.0149
						2015	8	13	225	36.3	25.9	31.1	24	52.8373	43.9606	27.2632	7.81905	13.2078
						2015	8	14	226	36.3	28.2	32.25	22.5	58.7159	38.0479	26.7373	7.84857	11.8291
						2015	8	15	227	35.8	27	31.4	20	0	0	0	0	0.626357
						2015	8	16	228	32.8	24.1	28.45	20.5	56.1919	39.1096	26.5188	7.19339	11.887
						2015	8	17	229	34.3	24.8	29.55	20.5	52.2746	39.7287	25.7794	7.15913	12.2227
						2015	8	18	230	34.2	26.9	30.55	23.5	61.8021	36.0924	26.7168	7.57616	10.944
						2015	8	19	231	37.7	27.8	32.75	22	52.8893	41.8883	26.626	7.89395	13.0908
						2015	8	20	232	38.4	31.3	34.85	27	58.0026	32.9455	24.7284	7.63595	10.0877
						2015	8	21	233	35.2	25.8	30.5	26.5	0	0	0	0	0.58011
						2015	8	22	234	35.1	27.8	31.45	24.5	0	0	0	0	0.598478
						2015	8	23	235	34.2	27.7	30.95	30.5	61.0362	31.7388	24.898	7.1188	9.03127
						2015	8	24	236	34.4	25.5	29.95	34	49.2773	35.0854	23.5213	6.58723	9.43376
						2015	8	25	237	33.8	23.7	28.75	29.5	47.602	38.4624	24.205	6.60836	10.6804
						2015	8	26	238	30.4	19.9	25.15	24.5	51.7137	43.4395	26.8115	6.75385	12.0618
						2015	8	27	239	30.7	21.9	26.3	24	55.6583	39.1834	26.4175	6.83278	11.1741
						2015	8	28	240	31.9	23.4	27.65	23	54.8754	37.3153	25.5981	6.82353	10.974
						2015	8	29	241	32.9	22.5	27.7	22.5	0	0	0	0	0.585419
						2015	8	30	242	33	24.6	28.8	28.5	0	0	0	0	0.556864
						2015	8	31	243	33	24.2	28.6	26.5	0	0	0	0	0.567677
						2015	9	1	244	33.4	23.3	28.35	23.5	49.9298	40.3433	25.3887	6.87196	11.8594
						2015	9	2	245	34.9	24.2	29.55	26.5	48.0625	41.1415	25.1547	6.98564	11.8737
						2015	9	3	246	36	27.8	31.9	24	53.5682	35.1407	24.5434	7.15416	10.766
						2015	9	4	247	36.3	28	32.15	27	52.8031	35.0612	24.3399	7.13053	10.4332
						2015	9	5	248	33.9	26.8	30.35	24	32.087	18.2254	13.6798	3.86316	5.78019
						2015	9	6	249	30.8	25.1	27.95	23	24.7924	11.3053	9.47058	2.54118	3.74462
						2015	9	7	250	33.3	25.2	29.25	21	40.662	26.349	18.5162	5.1095	8.24186
						2015	9	8	251	35.4	26.6	31	20.5	48.1	33.8624	22.83	6.53423	10.6762
						2015	9	9	252	36.8	28.9	32.85	21	45.5494	28.7872	20.4841	6.08504	9.29374
						2015	9	10	253	36.3	29.6	32.95	23	47.3061	25.3561	19.5918	5.83148	8.10182
						2015	9	11	254	36.3	29.2	32.75	22	45.4995	25.8437	19.398	5.75102	8.31489
						2015	9	12	255	35.6	27.6	31.6	21	0	0	0	0	0.621364
						2015	9	13	256	34.6	26.3	30.45	19	37.624	24.9823	17.343	4.90782	8.11267
						2015	9	14	257	33.3	27.1	30.2	18	42.8908	21.2738	17.0876	4.81049	7.05142
						2015	9	15	258	33.5	26.7	30.1	23.5	42.8325	23.3009	17.871	5.02055	7.242
						2015	9	16	259	33.9	26.1	30	24.5	48.5034	30.2661	21.674	6.07624	9.12288
						2015	9	17	260	31.8	23.9	27.85	37.5	49.4365	31.2439	22.2321	5.95237	7.91549
						2015	9	18	261	33.9	25.2	29.55	22.5	45.8383	31.9034	21.6326	6.00753	9.73583
						2015	9	19	262	33.5	23.4	28.45	51.5	0	0	0	0	0.424229
						2015	9	20	263	32.9	24.8	28.85	38.5	44.5486	28.8675	20.286	5.5503	7.35129
						2015	9	21	264	33.4	25.3	29.35	45	41.7598	27.0604	19.0161	5.25861	6.40743
						2015	9	22	265	27.9	22.6	25.25	48.5	56.9395	24.1423	20.9735	5.29557	5.21077
						2015	9	23	266	29.9	21.3	25.6	52.5	45.2759	31.1498	21.244	5.40747	6.49732
						2015	9	24	267	31.8	23.2	27.5	42.5	45.192	31.0921	21.2046	5.63374	7.36908
						2015	9	25	268	30.3	23.9	27.1	24.5	53.0973	27.1858	21.4923	5.65975	7.9701
						2015	9	26	269	29.3	21.9	25.6	33	48.3916	28.6478	21.0623	5.36122	7.4674
						2015	9	27	270	29.4	21.3	25.35	30.5	44.3978	28.7698	20.2173	5.1165	7.68447
						2015	9	28	271	30	21.4	25.7	42.5	43.012	29.5923	20.1818	5.14892	6.86626
						2015	9	29	272	29.1	21.9	25.5	39.5	41.8598	24.1112	17.9714	4.56393	5.8812
						2015	9	30	273	28	19.8	23.9	41.5	29.8153	19.5589	13.6605	3.34096	4.62399
						2015	10	1	274	28.6	21.1	24.85	39	39.8511	23.9107	17.4619	4.36795	5.81609
						2015	10	2	275	26.9	19.2	23.05	40	35.5296	21.8863	15.7745	3.77934	5.14578
						2015	10	3	276	29.3	19.3	24.3	45	31.9534	25.5627	16.1673	3.99196	5.67905
						2015	10	4	277	28.6	19.5	24.05	30	39.7786	28.9588	19.1995	4.71252	7.62158
						2015	10	5	278	27.9	19.6	23.75	25	39.1045	25.9654	18.0255	4.39264	7.23429
						2015	10	6	279	27.2	17.3	22.25	27	18.9552	15.0125	9.54259	2.24149	4.20737
						2015	10	7	280	20.5	15.9	18.2	22.5	28.7803	10.5911	9.8763	2.08528	3.00165
						2015	10	8	281	22	15	18.5	24.5	0	0	0	0	0.488135
						2015	10	9	282	22.5	15.2	18.85	26	38.679	22.5885	16.7208	3.59417	5.72089
						2015	10	10	283	22.9	15.1	19	21	0	0	0	0	0.512059
						2015	10	11	284	24.2	15.6	19.9	20	40.4394	27.8223	18.9746	4.19549	7.55337
						2015	10	12	285	26.9	18.5	22.7	17.5	38.2995	25.7373	17.7604	4.21868	7.60577
						2015	10	13	286	26.8	19.4	23.1	49.5	33.7723	19.9932	14.6993	3.52605	4.18025
						2015	10	14	287	23.5	16.3	19.9	50	37.0957	21.3671	15.9261	3.52143	4.14633
						2015	10	15	288	25.6	17.2	21.4	34.5	34.5768	23.2356	16.0341	3.68637	5.63771
						2015	10	16	289	26.2	18.8	22.5	38	40.3975	23.9153	17.5829	4.15588	5.66619
						2015	10	17	290	24	17.1	20.55	33.5	43.7872	24.1705	18.4031	4.13928	5.81508
						2015	10	18	291	24.7	17.2	20.95	33.5	36.3452	21.8071	15.9257	3.61941	5.33471
						2015	10	19	292	25.9	18.6	22.25	44.5	38.7817	22.6485	16.7652	3.93802	4.94069
						2015	10	20	293	23.9	17.9	20.9	38.5	35.7155	17.1434	13.9976	3.1771	4.04138
						2015	10	21	294	25.6	17.7	21.65	39	29.2729	18.5005	13.1643	3.04589	4.36314
						2015	10	22	295	23.8	17.8	20.8	31	33.8609	16.2532	13.2707	3.00434	4.20058
						2015	10	23	296	19.7	14.9	17.3	35.5	10.7834	4.14081	3.78002	0.778161	1.24884
						2015	10	24	297	24.7	17.4	21.05	32	0	0	0	0	0.475597
						2015	10	25	298	22.2	14	18.1	30	8.7145	5.71671	3.99272	0.840682	1.70147
						2015	10	26	299	19.8	14	16.9	29	22.9979	10.671	8.86179	1.80351	2.72449
						2015	10	27	300	18	13	15.5	30.5	18.1479	7.25915	6.49278	1.26807	1.88317
						2015	10	28	301	18.4	10.7	14.55	29.5	19.94	12.283	8.85299	1.6797	2.83639
						2015	10	29	302	15.7	11.5	13.6	30.5	15.5157	5.21326	5.08762	0.936942	1.3765
						2015	10	30	303	17	10.6	13.8	29.5	19.9579	10.2185	8.0784	1.4972	2.36375
						2015	10	31	304	17.3	11.3	14.3	26	0	0	0	0	0.424626
						2015	11	1	305	16.6	10.4	13.5	53	32.4264	16.0835	12.9186	2.37152	2.66863
						2015	11	2	306	15.2	8.7	11.95	54	37.8699	19.6923	15.4479	2.69541	2.99416
						2015	11	3	307	15.9	8.6	12.25	52	36.06	21.0591	15.5886	2.74739	3.226
						2015	11	4	308	17.6	10	13.8	54	34.4251	20.9305	15.1846	2.81422	3.4195
						2015	11	5	309	16.8	11.8	14.3	62	24.2007	9.68027	8.6583	1.63007	1.78081
						2015	11	6	310	16.7	11.3	14	63.5	0	0	0	0	0.312779
						2015	11	7	311	19.6	11.5	15.55	66.5	29.5032	19.1181	13.4348	2.62782	3.34644
						2015	11	8	312	17.7	9.7	13.7	59.5	28.0023	17.9214	12.6724	2.34119	2.96128
						2015	11	9	313	15	6.9	10.95	73	0	0	0	0	0.273391
						2015	11	10	314	12.5	4.5	8.5	78	0	0	0	0	0.234347
						2015	11	11	315	11.9	6.4	9.15	70.5	35.2326	15.5024	13.2205	2.08965	2.06628
						2015	11	12	316	15.1	7.5	11.3	53	27.8023	16.9038	12.2633	2.093	2.52986
						2015	11	13	317	16.4	9.2	12.8	47.5	32.0702	18.4724	13.7685	2.47102	3.03977
						2015	11	14	318	15	8.8	11.9	63	36.4243	18.0664	14.5113	2.52773	2.7642
						2015	11	15	319	15.9	9.2	12.55	65	0	0	0	0	0.295141
						2015	11	16	320	13.2	7	10.1	60	16.683	8.27476	6.64644	1.08758	1.29291
						2015	11	17	321	10.2	6.4	8.3	62	14.0848	4.28177	4.393	0.672465	0.703629
						2015	11	18	322	11.7	5.2	8.45	57.5	32.9051	17.1106	13.4227	2.06651	2.14482
						2015	11	19	323	12.6	7.1	9.85	50	28.7507	12.6503	10.7882	1.7495	1.81125
						2015	11	20	324	14.5	6.8	10.65	57	30.0382	18.5035	13.3364	2.22531	2.65067
						2015	11	21	325	14.3	8.8	11.55	70	0	0	0	0	0.281855
						2015	11	22	326	15.5	8.6	12.05	65	31.2586	17.2548	13.1375	2.29999	2.67144
						2015	11	23	327	17.7	9.7	13.7	72.5	30.5669	19.5628	13.833	2.55561	3.20417
						2015	11	24	328	19.6	11.1	15.35	74.5	27.5692	18.7471	12.8604	2.50037	3.26699
						2015	11	25	329	17	11	14	73	29.8247	14.3159	11.6888	2.18005	2.45522
						2015	11	26	330	13.3	10	11.65	71.5	17.1151	4.51838	4.97457	0.85923	0.895541
						2015	11	27	331	14.5	8.3	11.4	67.5	9.1749	4.55075	3.65525	0.625991	0.888955
						2015	11	28	332	16.7	10.3	13.5	69	27.4564	14.0577	11.1136	2.04017	2.37116
						2015	11	29	333	12.7	7.6	10.15	56.5	13.5379	5.52348	4.89167	0.801876	0.952517
						2015	11	30	334	12.9	8.4	10.65	57.5	17.8466	6.42477	6.05733	1.01072	1.09597
						2015	12	1	335	12.2	6.6	9.4	61	28.6897	12.853	10.8628	1.73291	1.78458
						2015	12	2	336	10	4.6	7.3	59.5	30.9718	13.3798	11.5155	1.69521	1.56987
						2015	12	3	337	5.8	-2.1	1.85	38	24.5702	15.5284	11.0495	1.27342	0.702449
						2015	12	4	338	2.5	-1.6	0.45	63	39.5482	12.9718	12.8126	1.37142	0.135995
						2015	12	5	339	2.8	-2.7	0.05	60	34.2105	15.0526	12.8369	1.3439	0.0176552
						2015	12	6	340	7.5	-1.3	3.1	85.5	25.3785	17.8665	12.0456	1.47653	1.05957
						2015	12	7	341	9.9	2.5	6.2	62.5	27.4983	16.279	11.9685	1.68469	1.66534
						2015	12	8	342	12.1	4.7	8.4	56.5	27.2106	16.1087	11.8433	1.81988	2.02519
						2015	12	9	343	14.4	7.1	10.75	62	27.4322	16.0204	11.8588	1.98571	2.3438
						2015	12	10	344	13.8	7.5	10.65	85	27.4211	13.8202	11.0122	1.83749	2.04786
						2015	12	11	345	12.3	7.3	9.8	63.5	30.5262	12.2105	10.9214	1.76789	1.75181
						2015	12	12	346	10.8	5.9	8.35	66	31.7783	12.4571	11.2551	1.72619	1.61264
						2015	12	13	347	10.1	5.6	7.85	68	15.5064	5.58232	5.26306	0.79176	0.817093
						2015	12	14	348	10.3	5.5	7.9	59	13.2761	5.09804	4.65385	0.701477	0.768712
						2015	12	15	349	11.7	5.3	8.5	62.5	27.174	13.9131	10.9992	1.69663	1.79439
						2015	12	16	350	9.2	3.8	6.5	61.5	17.3299	7.48652	6.44337	0.918306	0.897521
						2015	12	17	351	7.2	4.8	6	59.5	16.1942	3.10929	4.01408	0.560313	0.460509
						2015	12	18	352	10.3	4	7.15	57	0	0	0	0	0.209142
						2015	12	19	353	10.9	5.3	8.1	56.5	27.4666	12.3051	10.3997	1.57975	1.56476
						2015	12	20	354	8.9	4.3	6.6	54	32.6774	12.0253	11.2136	1.60474	1.33703
						2015	12	21	355	9	2.8	5.9	47.5	29.3618	14.5634	11.6976	1.62598	1.50942
						2015	12	22	356	12.3	4.6	8.45	46	24.528	15.1092	10.89	1.67658	2.03104
						2015	12	23	357	10.6	5.4	8	54	0	0	0	0	0.225357
						2015	12	24	358	9.5	4	6.75	60.5	29.9402	13.1737	11.2346	1.61762	1.46847
						2015	12	25	359	11.7	4.6	8.15	58	27.59	15.6711	11.7625	1.79022	1.93838
						2015	12	26	360	12	6.3	9.15	58.5	28.6824	13.0792	10.9565	1.73181	1.78167
						2015	12	27	361	12.7	6.2	9.45	59.5	27.3542	14.2242	11.1584	1.78334	1.9547
						2015	12	28	362	13.2	6.8	10	57	27.6932	14.1789	11.2094	1.82766	2.01735
						2015	12	29	363	9	5.4	7.2	82.5	0	0	0	0	0.21013
						2015	12	30	364	6.1	1.5	3.8	76	2.84411	1.04663	0.97599	0.123642	0.19654
						2015	12	31	365	2.1	-1.4	0.35	83	0.451805	0.126506	0.13524	0.0143963	0.0156672
																	978.281	1444.55
																	ETo-HS	ETo-TURC (Ousman Couly (2016)

## Sheet: 2016
	MARDİN					year	month	day	DOY	Tmax	Tmin	Tmean	Rhmean	Ra	Rs=0.16(Tmax-Tmin)^0.5*Ra	Rs=from meteorological station	ETo-HS	ETo-TURC (Ousman Couly (2016)
	DOY	246					#	#		°C	°C	°C	%	MJ m-2 day-1*(0.408 mm day-1)
	φ (-)	37.31	0.651182			2016	1	1	1	0.2	-2.6	-1.2	55.5	2.22697	0.498841	0.596229	0.0580482	-0.0697861
	tan(φ)		0.762072			2016	1	2	2	-1.5	-6.4	-3.95	51.5	17.183	6.73575	6.0858	0.494351	-0.978021
	sin(φ)		0.606127			2016	1	3	3	-2.5	-8	-5.25	60	29.4146	12.9424	11.0374	0.812412	-2.50926
	cos(φ)		0.795368			2016	1	4	4	-1.6	-5.3	-3.45	57.5	6.01454	1.7803	1.85107	0.155791	-0.35838
	dr	0.984766		(1+0.033*cos(2*3.14/365*DOY))		2016	1	5	5	2.9	-1.7	0.6	73	3.38829	1.24689	1.16273	0.125477	0.039786
	δ	0.120494		(0.409*sin(2*3.14/365*DOY-1.39))		2016	1	6	6	3.8	2.1	2.95	82.5	30.9548	4.20985	6.45761	0.785883	0.320959
	tan(δ)	0.121081				2016	1	7	7	6.5	3.5	5	83	2.5473	0.611352	0.705928	0.0943981	0.209355
	sin(δ)	0.120203				2016	1	8	8	6.6	4.1	5.35	83	4.61099	0.922198	1.1665	0.158381	0.24549
	cos(δ)	0.992749				2016	1	9	9	6.4	0.9	3.65	84	27.3258	12.0233	10.2535	1.28994	0.85626
	X	0.991486				2016	1	10	10	8.3	1.2	4.75	95	29.0926	16.5246	12.4032	1.64039	1.38785		-
	ωs (eq. 25)	1.49187		(acos{(-1*tan(-0.35)*tan(0.409*sin(2*3.14/365*DOY-1.39))))		2016	1	11	11	5.9	2.1	4	77	20.5392	6.2439	6.40611	0.819066	0.543897
	sin ωs	0.996887				2016	1	12	12	8.2	1.6	4.9	65.5	28.2218	14.9011	11.6005	1.54444	1.29696
	sin φ*sin δ	-0.0728584		(sin(0.35)*sin(0.409*sin(2*3.14/365*DOY-1.39)))		2016	1	13	13	7.3	5.4	6.35	69.5	38.4158	5.83919	8.47239	1.20003	0.731083
	cos φ*cos δ	0.789601		(cos(0.35)*cos(0.409*sin(2*3.14/365*DOY-1.39))		2016	1	14	14	9.1	5.3	7.2	73.5	11.3784	3.45904	3.5489	0.520358	0.557904
	Gsc	0.082				2016	1	15	15	6.9	1.2	4.05	66	29.8629	13.6175	11.4075	1.46187	1.03521
						2016	1	16	16	8.7	2.4	5.55	57	31.7291	15.9915	12.7423	1.74503	1.51383
	Ra	25.1244				2016	1	17	17	10.3	5.5	7.9	52.5	33.4024	12.8265	11.7089	1.7649	1.59522
						2016	1	18	18	8.2	4.9	6.55	55	6.16696	1.62808	1.79245	0.255985	0.350327
						2016	1	19	19	6.7	1.8	4.25	49.5	4.51003	1.76793	1.59734	0.206573	0.265929
						2016	1	20	20	5.2	1.5	3.35	65	11.5312	3.41322	3.5489	0.440223	0.311449
						2016	1	21	21	7.3	3.1	5.2	73	34.7893	11.6892	11.4075	1.53881	1.09961
						2016	1	22	22	8.8	4	6.4	66.5	29.026	11.146	10.1748	1.44414	1.22711
						2016	1	23	23	8.8	5.3	7.05	65.5	23.8771	6.6856	7.14721	1.04167	0.869799
						2016	1	24	24	6.1	0.1	3.1	69	6.42283	3.08296	2.51722	0.308558	0.274653
						2016	1	25	25	1.2	-4.9	-1.85	74	12.0809	5.89548	4.77402	0.446594	-0.348264
						2016	1	26	26	-3.4	-8	-5.7	69	36.9234	13.5878	12.6707	0.899195	-2.97878
						2016	1	27	27	-3.2	-8.6	-5.9	76.5	36.9875	15.9786	13.7522	0.959814	-3.63159
						2016	1	28	28	-0.8	-7.6	-4.2	77	32.9859	17.9443	13.7627	1.09777	-2.41525
						2016	1	29	29	3.6	-4.6	-0.5	75	30.7219	20.1536	14.0759	1.4282	-0.237776
						2016	1	30	30	8.5	1.1	4.8	70.5	30.1177	17.8297	13.1087	1.73754	1.497
						2016	1	31	31	9.2	2.9	6.05	76.5	23.7137	11.9517	9.52333	1.33213	1.25108
						2016	2	1	32	9.3	3.1	6.2	90.5	29.8736	14.8173	11.9015	1.67526	1.53282
						2016	2	2	33	6	1.8	3.9	81	4.62367	1.55355	1.51611	0.192956	0.233072
						2016	2	3	34	7.5	-0.3	3.6	55.5	35.5701	22.1957	15.8947	1.99496	1.45714
						2016	2	4	35	11.2	3	7.1	54.5	33.84	22.199	15.5045	2.26425	2.41901
						2016	2	5	36	10.8	5.3	8.05	62	35.3777	15.5662	13.2749	2.01261	1.91154
						2016	2	6	37	8	4.4	6.2	65.5	2.89773	0.834546	0.879689	0.123825	0.26514
						2016	2	7	38	5.9	2	3.95	83	18.9861	5.92367	5.99913	0.765272	0.517823
						2016	2	8	39	8.4	0.6	4.5	68.5	13.6201	8.49895	6.08622	0.796014	0.757517
						2016	2	9	40	9	2.9	5.95	58	38.9085	18.9873	15.3755	2.14171	1.85571
						2016	2	10	41	9.4	3.7	6.55	58.5	26.8838	12.259	10.2695	1.46661	1.352
						2016	2	11	42	8.1	1.7	4.9	69.5	32.195	16.4838	13.0316	1.73497	1.41777
						2016	2	12	43	10.9	5	7.95	82.5	27.8764	13.1577	10.8339	1.63617	1.63738
						2016	2	13	44	12.9	4.3	8.6	69	33.2979	22.909	15.6238	2.41913	2.82404
						2016	2	14	45	12	7.2	9.6	53.5	28.0023	10.7529	9.816	1.57744	1.55368
						2016	2	15	46	12.9	5.6	9.25	45.5	38.8582	22.6932	16.7982	2.66501	3.11894
						2016	2	16	47	15.8	6.6	11.2	65	33.4534	24.6217	16.2351	2.76135	3.53981
						2016	2	17	48	19.5	9.2	14.35	86.5	32.5478	26.8194	16.7132	3.15145	4.38172
						2016	2	18	49	18.4	10.5	14.45	75	39.033	24.6689	17.5536	3.32019	4.07016
						2016	2	19	50	15.9	12.5	14.2	76	45.6145	12.4071	13.4574	2.52569	2.18549
						2016	2	20	51	15.4	9.7	12.55	68	37.9082	17.2861	14.4807	2.57761	2.73622
						2016	2	21	52	13.5	9.4	11.45	79	19.8148	6.49926	6.41951	1.10127	1.15265
						2016	2	22	53	12.6	7.8	10.2	65.5	4.49227	1.72503	1.57473	0.258602	0.478696
						2016	2	23	54	8.7	6	7.35	66.5	7.99634	1.72721	2.10229	0.310098	0.38915
						2016	2	24	55	11.8	6.1	8.95	69	35.5725	16.221	13.5885	2.13188	2.12125
						2016	2	25	56	11.9	7.3	9.6	53	18.7741	6.90885	6.44254	1.03532	1.08864
						2016	2	26	57	16.1	8.3	12.2	53.5	38.3642	23.9392	17.1433	3.01636	3.61921
						2016	2	27	58	15.7	8.2	11.95	54	34.7657	20.8594	15.2336	2.65801	3.15459
						2016	2	28	59	14	7.4	10.7	55.5	46.2045	24.396	18.9922	3.1746	3.41844
						2016	3	1	60	12.8	9.8	11.3	81	71.693	17.2063	19.8682	3.39093	2.57015
						2016	3	2	61	18.4	10.2	14.3	79	44.1811	28.9828	20.2425	3.81098	4.70122
						2016	3	3	62	18.4	11.9	15.15	63.5	48.8834	25.4194	19.9406	3.85355	4.28516
						2016	3	4	63	16.3	9.8	13.05	49.5	22.4007	11.6483	9.13771	1.65333	1.99556
						2016	3	5	64	12.3	9	10.65	77	9.69197	2.55868	2.81701	0.470045	0.598348
						2016	3	6	65	12.5	6.5	9.5	45	43.7579	21.0038	17.1495	2.74589	2.97425
						2016	3	7	66	11	3.5	7.25	32.5	25.7845	15.4707	11.2982	1.65991	2.21728
						2016	3	8	67	14.7	6.8	10.75	43.5	46.2141	29.2073	20.783	3.48003	4.42653
						2016	3	9	68	15.5	8.3	11.9	45	47.9512	27.6199	20.5866	3.586	4.36536
						2016	3	10	69	16.5	9.7	13.1	44.5	48.7503	26.5202	20.34	3.68619	4.4596
						2016	3	11	70	16.2	10.7	13.45	44	36.2034	15.9295	13.5847	2.48982	2.86721
						2016	3	12	71	15.3	10.4	12.85	62	21.8219	8.5542	7.72878	1.38934	1.52248
						2016	3	13	72	16.4	10	13.2	63.5	48.9111	25.0425	19.7978	3.59954	3.93709
						2016	3	14	73	17.6	10.5	14.05	50	49.8964	28.3411	21.2725	3.9737	4.56257
						2016	3	15	74	14.2	8.7	11.45	46	13.3432	5.87101	5.00681	0.858925	1.12939
						2016	3	16	75	9.8	5.2	7.5	42.5	18.9192	6.96228	6.49236	0.963366	1.03562
						2016	3	17	76	9.2	4.2	6.7	66	28.333	11.3332	10.1367	1.45657	1.28479
						2016	3	18	77	9.4	2	5.7	77	55.2928	32.7334	24.066	3.31696	2.9726
						2016	3	19	78	9.3	1.6	5.45	64	53.5345	32.9772	23.7683	3.24108	2.89712
						2016	3	20	79	10.7	4.3	7.5	48.5	47.4443	24.2915	19.2041	2.84959	2.7845
						2016	3	21	80	12	6.9	9.45	49.5	40.834	16.6603	14.7546	2.35809	2.26263
						2016	3	22	81	13.5	3	8.25	47	43.1234	36.2237	22.3577	3.41589	4.39513
						2016	3	23	82	11.9	3.7	7.8	61	51.1163	33.5323	23.42	3.51637	3.77784
						2016	3	24	83	13.3	7.6	10.45	69	53.6459	24.4625	20.4924	3.39531	3.37984
						2016	3	25	84	16.7	10	13.35	54	47.6458	25.5381	19.7325	3.60502	4.03312
						2016	3	26	85	15.4	11.3	13.35	48.5	36.8885	12.0994	11.951	2.18338	2.11574
						2016	3	27	86	14.4	10	12.2	46	33.2571	11.7065	11.1617	1.9639	2.02794
						2016	3	28	87	14.1	7.6	10.85	66	39.7205	20.6547	16.2029	2.7226	2.95945
						2016	3	29	88	9.5	4.4	6.95	66	15.3526	6.26385	5.54736	0.805247	0.819971
						2016	3	30	89	9.5	3.3	6.4	61.5	23.3377	11.5755	9.29765	1.31964	1.26693
						2016	3	31	90	11.6	3.2	7.4	52	47.2934	31.7812	21.9311	3.24137	3.46877
						2016	4	1	91	12.9	5.2	9.05	45.5	40.856	25.1673	18.1393	2.8565	3.38405
						2016	4	2	92	13.3	3.6	8.45	37.5	50.6179	39.2795	25.2237	3.88335	5.44642
						2016	4	3	93	15.8	8.6	12.2	43	58.8399	33.8918	25.2614	4.44475	5.50336
						2016	4	4	94	16.7	10.1	13.4	42.5	48.8396	25.7873	20.0754	3.67356	4.51443
						2016	4	5	95	17.3	8.6	12.95	59.5	54.3261	37.811	25.6383	4.62383	5.73104
						2016	4	6	96	19	12.2	15.6	55	60.7484	33.0471	25.346	4.96505	5.55305
						2016	4	7	97	21.3	14.6	17.95	45.5	60.2397	32.2885	24.9482	5.23099	6.17896
						2016	4	8	98	22.9	13.7	18.3	34.5	42.3261	31.152	20.541	4.34907	6.91709
						2016	4	9	99	22	14.1	18.05	41	53.1895	33.6158	23.9199	5.02941	6.82237
						2016	4	10	100	21.5	17.4	19.45	65	56.3737	18.4906	18.2637	3.99009	3.60205
						2016	4	11	101	20.7	13.7	17.2	66	51.4206	28.7955	21.7674	4.4683	5.11434
						2016	4	12	102	17.8	11	14.4	63.5	11.4894	6.25022	4.7937	0.905304	1.26635
						2016	4	13	103	16.7	9.7	13.2	56.5	44.7067	25.0357	18.9252	3.44089	3.93612
						2016	4	14	104	18.4	7.6	13	47.5	42.2734	36.5242	22.2279	4.0153	5.75618
						2016	4	15	105	18.2	10.1	14.15	43.5	28.7603	18.6367	13.0965	2.45411	3.40857
						2016	4	16	106	19.1	11.5	15.3	58	60.4856	36.7752	26.6796	5.17934	6.08376
						2016	4	17	107	20.5	12.2	16.35	67.5	59.3994	39.4412	27.3805	5.48403	6.71454
						2016	4	18	108	20.9	11.7	16.3	70	59.432	43.7419	28.8426	5.76841	7.399
						2016	4	19	109	20.9	13	16.95	64	49.9318	31.5569	22.4549	4.5765	5.53357
						2016	4	20	110	21.8	14.1	17.95	67	64.3014	39.6096	28.5486	5.9859	7.04211
						2016	4	21	111	23.4	16.6	20	63.5	58.4263	31.7839	24.3771	5.40434	6.00052
						2016	4	22	112	23.8	17.2	20.5	79	52.8988	27.9306	21.7439	4.88433	5.37411
						2016	4	23	113	21.7	7.9	14.8	66.5	51.0866	56.3996	30.3645	5.80567	9.00505
						2016	4	24	114	23.4	15	19.2	42.5	63.3733	42.5868	29.3877	6.37728	8.60841
						2016	4	25	115	25	16.7	20.85	31.5	0	0	0	0	0.476398
						2016	4	26	116	24.8	20.1	22.45	38.5	43.5512	16.3753	15.1067	3.56618	3.99523
						2016	4	27	117	21.8	12.4	17.1	41	55.5751	41.7925	27.2624	5.5803	8.17848
						2016	4	28	118	24.1	17.8	20.95	38.5	49.2456	24.8198	19.7769	4.49467	5.66
						2016	4	29	119	22.4	16.6	19.5	36.5	61.1679	28.3819	23.5699	5.15625	6.36891
						2016	4	30	120	23.1	12.7	17.9	31	48.651	40.4776	25.1032	5.25611	9.12831
						2016	5	1	121	23.6	15.9	19.75	28.5	58.975	36.3286	26.1838	5.76648	8.84786
						2016	5	2	122	23.6	15.8	19.7	24	44.5727	27.8134	19.9176	4.38062	7.21758
						2016	5	3	123	25.1	15.9	20.5	23	52.2961	38.4899	25.3795	5.70098	10.0664
						2016	5	4	124	23.6	13.9	18.75	30.5	41.74	32.3902	20.7998	4.45876	7.59249
						2016	5	5	125	20.8	12.5	16.65	36.5	22.8872	15.1971	10.55	2.13162	3.36289
						2016	5	6	126	19.8	11.2	15.5	40.5	57.6313	39.6504	27.0413	5.28129	7.46825
						2016	5	7	127	19.6	12.3	15.95	50.5	58.111	33.9368	25.1212	4.97258	5.75556
						2016	5	8	128	17.5	10.8	14.15	51	51.067	27.3719	21.1494	3.96311	4.43343
						2016	5	9	129	21.5	9	15.25	62.5	50.4059	50.4059	28.5139	5.52708	8.20411
						2016	5	10	130	23.9	14.9	19.4	59	44.8777	32.3119	21.5413	4.69983	6.01434
						2016	5	11	131	25.5	18	21.75	67.5	0	0	0	0	0.383451
						2016	5	12	132	26.2	17	21.6	68	48.3878	35.6134	23.4828	5.42643	6.89787
						2016	5	13	133	24.1	13	18.55	76	37.445	33.2512	19.9607	4.25547	6.05751
						2016	5	14	134	24.9	16.1	20.5	71.5	57.4526	40.4466	27.2691	6.12544	7.61465
						2016	5	15	135	26.9	18.6	22.75	66	61.1788	40.6227	28.2007	6.70685	7.97964
						2016	5	16	136	29	17.7	23.35	65	47.2564	42.7198	25.4168	6.1342	8.45778
						2016	5	17	137	28.1	19.5	23.8	59.5	49.0764	33.7646	23.0272	5.61828	6.81791
						2016	5	18	138	26.8	17.5	22.15	54.5	34.5912	25.7358	16.8782	3.95468	5.1431
						2016	5	19	139	26	16.8	21.4	56	54.5772	40.1688	26.4865	6.08947	7.70179
						2016	5	20	140	23.3	13.3	18.3	49	60.4253	48.3402	30.5731	6.47313	8.71405
						2016	5	21	141	25.3	14	19.65	68.5	57.3322	51.8283	30.836	6.77295	9.47889
						2016	5	22	142	27.4	17	22.2	57.5	50.8825	42.3342	26.2546	6.15933	8.21849
						2016	5	23	143	28.8	20.6	24.7	47.5	62.1429	40.7657	28.472	7.09701	8.56085
						2016	5	24	144	28	20	24	41.5	54.403	34.8179	24.62	6.03576	7.89586
						2016	5	25	145	23	13.9	18.45	40.5	61.3833	44.687	29.6272	6.29893	9.08372
						2016	5	26	146	25.4	15.5	20.45	46	58.04	45.9677	29.219	6.55488	9.08522
						2016	5	27	147	22.2	13.6	17.9	53.5	43.0825	29.6408	20.2148	4.23259	5.35179
						2016	5	28	148	25	15.4	20.2	55	26.092	20.0387	12.9349	2.8828	3.93664
						2016	5	29	149	24.3	14.1	19.2	48.5	26.3019	21.4624	13.4403	2.91661	4.18678
						2016	5	30	150	21.9	11.8	16.85	34.5	48.5209	39.2049	24.6723	5.01396	8.27212
						2016	5	31	151	25.3	13.8	19.55	34.5	55.1616	50.7487	29.9299	6.55638	11.3209
						2016	6	1	152	26.8	15.3	21.05	34.5	56.0228	51.541	30.3972	6.92616	11.8575
						2016	6	2	153	28.3	17.5	22.9	36	59.6572	51.5438	31.3686	7.48785	12.0553
						2016	6	3	154	28.2	17.7	22.95	29.5	55.1468	46.3233	28.5913	6.8333	11.734
						2016	6	4	155	30.8	20.2	25.5	29	50.3849	42.7264	26.2466	6.66545	11.3718
						2016	6	5	156	30.7	20.8	25.75	29	59.0988	46.8062	29.752	7.59927	12.4517
						2016	6	6	157	30.4	17.7	24.05	27.5	49.2812	50.0697	28.0998	6.8971	13.1594
						2016	6	7	158	30.9	19.5	25.2	43	55.2852	50.4201	29.8663	7.53213	11.2246
						2016	6	8	159	26.3	15.9	21.1	38.5	54.0196	44.9443	27.8733	6.35925	9.92228
						2016	6	9	160	27.9	17.1	22.5	29	51.0844	44.1369	26.8609	6.34882	11.1777
						2016	6	10	161	27.6	20.8	24.2	40.5	71.72	39.0157	29.9237	7.37109	8.93433
						2016	6	11	162	27.6	16.4	22	37.5	59.3032	53.1357	31.7546	7.41239	11.9972
						2016	6	12	163	28.4	19.3	23.85	34.5	63.8096	46.4534	30.7983	7.52333	11.2839
						2016	6	13	164	28.3	17.1	22.7	28	58.5189	52.4329	31.3347	7.443	13.3757
						2016	6	14	165	31.1	19.4	25.25	26	58.3167	54.5845	31.9158	8.05837	14.8004
						2016	6	15	166	34.1	24.1	29.1	22.5	60.2929	48.2343	30.5061	8.39126	14.3384
						2016	6	16	167	34.7	23.5	29.1	20.5	44.1781	39.5836	23.6557	6.50694	12.1172
						2016	6	17	168	28.1	18.8	23.45	22.5	57.4151	42.7168	28.0148	6.77766	11.7994
						2016	6	18	169	28.6	18.8	23.7	28	50.8003	39.8274	25.4448	6.19321	10.4588
						2016	6	19	170	28.4	20.5	24.45	52	58.0635	36.6961	26.1118	6.47041	7.45195
						2016	6	20	171	32.1	20.4	26.25	32.5	44.5764	41.7235	24.396	6.30278	10.804
						2016	6	21	172	32.9	20.7	26.8	33	51.882	50.6368	28.9946	7.58437	13.0249
						2016	6	22	173	34.2	23.5	28.85	28	55.6977	47.6773	29.1507	7.97571	13.3405
						2016	6	23	174	35.9	23.5	29.7	23.5	47.1279	46.7508	26.5527	7.39725	13.8683
						2016	6	24	175	35.5	24.9	30.2	23.5	54.4367	46.1623	28.3573	7.98315	13.7777
						2016	6	25	176	36.1	25.8	30.95	22.5	45.7563	37.7032	23.4958	6.71788	11.5732
						2016	6	26	177	36.9	25.7	31.3	23.5	52.8068	47.3149	28.2761	8.1427	14.2733
						2016	6	27	178	37.2	26.9	32.05	23	44.9303	37.0226	23.0716	6.74546	11.4451
						2016	6	28	179	36.6	29.7	33.15	24.5	63.9339	35.2915	26.8705	8.02949	10.8846
						2016	6	29	180	33	22	27.5	23	58.1956	51.2121	30.8821	8.20488	14.8157
						2016	6	30	181	35	24.1	29.55	20	53.8306	46.9403	28.4356	7.89678	14.4025
						2016	7	1	182	33.6	26	29.8	20	67.8498	41.2527	29.9278	8.35507	12.7678
						2016	7	2	183	33.6	23.4	28.5	27.5	59.3564	48.4348	30.331	8.23638	13.5602
						2016	7	3	184	35.2	24.1	29.65	25	57.0225	50.636	30.3968	8.45925	14.7304
						2016	7	4	185	36.5	24.3	30.4	24	53.6756	52.3874	29.9969	8.47992	15.5085
						2016	7	5	186	36.6	25.7	31.15	22	55.2668	48.1927	29.1943	8.38144	14.7297
						2016	7	6	187	36	24.8	30.4	20.5	50.4688	45.2201	27.0242	7.63954	13.9591
						2016	7	7	188	34.7	24.6	29.65	17	37.3529	30.1811	18.9935	5.28578	9.77503
						2016	7	8	189	36.5	24.1	30.3	18.5	45.6958	45.3303	25.7459	7.26308	14.2573
						2016	7	9	190	34.9	23	28.95	21.5	50.1704	47.7622	27.6911	7.5926	14.3243
						2016	7	10	191	34.9	22.2	28.55	25.5	48.9309	49.7138	27.9001	7.58443	14.2127
						2016	7	11	192	35.6	24.3	29.95	21.5	55.133	49.8403	29.6532	8.30448	15.0934
						2016	7	12	193	32.1	21.2	26.65	23.5	59.4479	51.8386	31.4029	8.18672	14.7466
						2016	7	13	194	32.7	19.6	26.15	25	53.0006	55.5446	30.6928	7.91158	15.4089
						2016	7	14	195	35.7	24.6	30.15	25	54.7368	48.6063	29.1784	8.20574	14.2427
						2016	7	15	196	36.9	27.3	32.1	21.5	59.2929	45.537	29.394	8.60255	14.1591
						2016	7	16	197	36	29.3	32.65	17.5	70.7317	37.9122	29.2935	8.66763	12.442
						2016	7	17	198	35.5	28.9	32.2	20.5	70.5993	37.2765	29.0197	8.51002	11.8339
						2016	7	18	199	37.3	29	33.15	22.5	60.8082	40.3766	28.0299	8.37594	12.6242
						2016	7	19	200	37.3	29.4	33.35	27.5	59.5793	37.6541	26.7935	8.03789	11.2299
						2016	7	20	201	36	23.3	29.65	26	49.0022	49.7862	27.9407	7.77573	14.3405
						2016	7	21	202	36.1	30.3	33.2	25.5	69.0783	32.0523	26.618	7.96185	9.84192
						2016	7	22	203	36.7	25	30.85	23.5	50.5431	47.3083	27.6614	7.89269	14.2043
						2016	7	23	204	35	27.2	31.1	21.5	63.3631	39.5386	28.3142	8.12046	12.2504
						2016	7	24	205	35.8	25.5	30.65	18.5	57.056	47.0141	29.2981	8.32533	14.8196
						2016	7	25	206	36.9	25.7	31.3	19	55.3301	49.5758	29.6272	8.53179	15.6225
						2016	7	26	207	37.3	23.9	30.6	24	45.1952	48.4492	26.4706	7.51411	14.4185
						2016	7	27	208	36.7	27.1	31.9	25	56.6029	43.471	28.0604	8.17935	13.0376
						2016	7	28	209	35.8	27.2	31.5	18	61.5086	42.3179	28.8606	8.34488	13.5888
						2016	7	29	210	36.4	27	31.7	23	54.5013	40.985	26.7357	7.76183	12.5604
						2016	7	30	211	37.3	25.3	31.3	19.5	48.3571	46.4228	26.8022	7.71828	14.5965
						2016	7	31	212	35	28.1	31.55	19	67.1716	37.0787	28.2313	8.17119	11.8742
						2016	8	1	213	36.8	25.6	31.2	20.5	52.3799	46.9324	28.0475	8.06042	14.5879
						2016	8	2	214	37	27.3	32.15	16	57.4665	44.594	28.6366	8.38928	14.661
						2016	8	3	215	37.2	28.2	32.7	17.5	59.6482	42.9467	28.6311	8.48004	14.0147
						2016	8	4	216	36.5	27.5	32	20.5	58.7297	42.2854	28.1902	8.23372	13.3131
						2016	8	5	217	36.2	28.3	32.25	19	61.8193	39.0698	27.8008	8.16075	12.5657
						2016	8	6	218	36.6	29.5	33.05	20	63.025	35.7982	26.8697	8.01348	11.5411
						2016	8	7	219	35.6	28	31.8	22	61.3456	37.2981	27.0589	7.87154	11.6155
						2016	8	8	220	34.6	21.8	28.2	20.5	45.0698	46.1515	25.7995	6.96044	13.8763
						2016	8	9	221	37.5	26.9	32.2	24.5	41.7163	35.3754	21.7309	6.3726	10.8096
						2016	8	10	222	35.7	27.2	31.45	23.5	53.6017	36.4492	25.0039	7.22242	11.1514
						2016	8	11	223	36.4	29.8	33.1	25	63.4619	33.5079	26.0858	7.78737	10.3061
						2016	8	12	224	33.7	25.8	29.75	21.5	59.5178	37.6153	26.7658	7.46447	11.5144
						2016	8	13	225	35.4	27.6	31.5	22	56.3357	35.1535	25.1739	7.2789	10.9496
						2016	8	14	226	36.4	28.4	32.4	20.5	59.9764	38.3849	27.1422	7.9913	12.191
						2016	8	15	227	35.6	28.2	31.9	19.5	60.9464	36.0803	26.5267	7.73229	11.5551
						2016	8	16	228	37.3	29	33.15	18	50.5659	33.5757	23.3086	6.96512	11.0918
						2016	8	17	229	36.4	28.8	32.6	19	54.6705	33.2397	24.1146	7.12818	10.8227
						2016	8	18	230	31.3	20.6	25.95	22.5	49.8769	42.6946	26.1043	6.69819	12.2541
						2016	8	19	231	33.6	23.5	28.55	19.5	51.3873	41.5209	26.1298	7.1032	12.7246
						2016	8	20	232	36.6	26.4	31.5	25	48.185	39.319	24.6225	7.11946	11.8016
						2016	8	21	233	36	30.4	33.2	24	63.634	28.508	24.0937	7.20678	8.96023
						2016	8	22	234	36.4	32.1	34.25	23	73.3961	25.2483	24.3516	7.43389	8.16697
						2016	8	23	235	37.9	30.2	34.05	23	46.1758	28.4443	20.5012	6.23443	9.10545
						2016	8	24	236	36.1	29.3	32.7	24.5	55.6866	30.2935	23.2341	6.88153	9.38903
						2016	8	25	237	37	29.7	33.35	29	42.1774	24.6316	18.2331	5.46984	7.42791
						2016	8	26	238	37	30.4	33.7	23.5	50.9044	26.8775	20.9241	6.32008	8.56649
						2016	8	27	239	36.8	29.3	33.05	22.5	33.4881	20.0929	14.6738	4.37623	6.58816
						2016	8	28	240	36.2	28.8	32.5	23.5	48.6147	28.7799	21.1594	6.24223	9.02644
						2016	8	29	241	36.3	28.9	32.6	22	52.0548	30.8164	22.6567	6.69723	9.78095
						2016	8	30	242	36.1	27.8	31.95	21	50.495	33.5287	23.276	6.79154	10.627
						2016	8	31	243	36.9	29.6	33.25	18.5	47.2119	27.5718	20.4095	6.11078	9.188
						2016	9	1	244	35.9	29.5	32.7	21.5	54.7338	28.0237	22.1547	6.56183	9.0052
						2016	9	2	245	34.5	24.8	29.65	22.5	48.8945	37.9422	24.365	6.78064	11.4784
						2016	9	3	246	33.7	23.2	28.45	20.5	47.805	40.1562	24.7849	6.72307	12.189
						2016	9	4	247	31.9	23.3	27.6	23	51.4706	35.4118	24.1506	6.43061	10.4373
						2016	9	5	248	28.7	22.6	25.65	25.5	62.0245	30.268	24.5103	6.24606	8.54483
						2016	9	6	249	28.9	21.7	25.3	20.5	57.062	32.8677	24.4981	6.19268	9.67041
						2016	9	7	250	30.8	22.2	26.5	19	46.7251	32.1468	21.924	5.69627	9.7786
						2016	9	8	251	31.1	20.9	26	17.5	48.6652	39.7108	24.8678	6.38823	12.0327
						2016	9	9	252	33.7	21.9	27.8	20	42.1033	39.7455	23.1407	6.18884	12.034
						2016	9	10	253	33.4	26.1	29.75	25.5	53.122	31.0232	22.9644	6.40434	9.21279
						2016	9	11	254	34.3	25.8	30.05	21.5	48.3841	32.9012	22.57	6.33406	10.1814
						2016	9	12	255	33.1	25.1	29.1	19.5	51.0399	32.6655	23.098	6.35353	10.2072
						2016	9	13	256	33.9	24.4	29.15	17.5	46.9529	35.6842	23.1549	6.37599	11.3211
						2016	9	14	257	30.6	25	27.8	17.5	61.7209	27.651	23.3693	6.24998	8.76887
						2016	9	15	258	27.8	18.8	23.3	17	47.4762	34.1829	22.7886	5.49322	10.0656
						2016	9	16	259	28.3	21.1	24.7	20.5	52.4676	30.2213	22.5256	5.6148	8.85825
						2016	9	17	260	28.3	19.7	24	24	44.0186	30.2848	20.6541	5.06349	8.4701
						2016	9	18	261	27.7	16.8	22.25	35.5	42.7837	37.3074	22.6002	5.30863	8.80626
						2016	9	19	262	29.3	18.5	23.9	38.5	42.9678	37.1242	22.5931	5.52559	8.69586
						2016	9	20	263	29.5	20.6	25.05	36.5	47.2282	33.6265	22.5432	5.66546	8.26083
						2016	9	21	264	30.6	22.8	26.7	32	48.3553	30.1737	21.6079	5.63949	8.05074
						2016	9	22	265	25.7	21.9	23.8	52.5	62.78	19.0851	19.5809	4.77743	4.02655
						2016	9	23	266	27.4	18.6	23	52.5	38.5525	27.141	18.2984	4.37867	5.48466
						2016	9	24	267	24.8	18	21.4	42.5	49.3022	26.8204	20.5703	4.72928	5.83354
						2016	9	25	268	21.7	12.3	17	31.5	46.2835	34.8052	22.7044	4.63402	7.68203
						2016	9	26	269	24.6	12.4	18.5	31	40.0729	39.1112	22.395	4.76789	8.96789
						2016	9	27	270	25.7	16	20.85	36.5	40.2528	31.2362	20.0587	4.54694	7.16725
						2016	9	28	271	29.1	20.4	24.75	44.5	42.6142	29.6595	20.111	5.01882	6.60975
						2016	9	29	272	26.7	18.9	22.8	42	46.0522	28.7366	20.5787	4.90018	6.42283
						2016	9	30	273	22.8	13.2	18	46.5	44.733	34.355	22.176	4.65623	6.47064
						2016	10	1	274	23.4	13.5	18.45	43.5	41.3187	32.7244	20.801	4.42243	6.50556
						2016	10	2	275	25.7	13.6	19.65	34.5	37.7037	36.4972	20.9844	4.6091	8.28576
						2016	10	3	276	27.3	19.3	23.3	30	45.1537	28.8984	20.4342	4.9257	7.51384
						2016	10	4	277	28.2	20.4	24.3	22.5	37.2595	23.2499	16.6496	4.11106	6.7653
						2016	10	5	278	28.1	20.7	24.4	26.5	43.0708	25.4979	18.7465	4.6398	7.07437
						2016	10	6	279	28.7	20.4	24.55	27	0	0	0	0	0.534316
						2016	10	7	280	29.9	22.4	26.15	22	43.5586	26.1352	19.0864	4.91985	7.78446
						2016	10	8	281	29.3	21.8	25.55	26	43.6532	26.1919	19.1279	4.86322	7.41824
						2016	10	9	282	28.9	21.6	25.25	28	43.2157	25.238	18.682	4.71698	6.9848
						2016	10	10	283	27.6	19.7	23.65	22	42.1166	26.6177	18.9403	4.60447	7.62377
						2016	10	11	284	27.2	20.2	23.7	21	43.6108	24.422	18.4613	4.49344	7.11835
						2016	10	12	285	24.9	18.4	21.65	18	44.0325	22.8969	17.9618	4.1559	6.66746
						2016	10	13	286	26.4	19.3	22.85	50.5	38.1043	21.6433	16.2451	3.87304	4.4416
						2016	10	14	287	27.8	20.1	23.95	56	38.1768	23.5169	16.9498	4.15039	4.88109
						2016	10	15	288	26.6	17.8	22.2	39	36.5501	25.7312	17.348	4.06984	5.95573
						2016	10	16	289	23.7	16.7	20.2	40	41.0055	22.9631	17.3585	3.86868	5.09359
						2016	10	17	290	24.3	13	18.65	33.5	34.3641	31.0652	18.4827	3.95121	7.03923
						2016	10	18	291	24.2	16.6	20.4	31.5	40.7832	24.7962	17.989	4.03032	6.07243
						2016	10	19	292	24.8	17.5	21.15	32	36.2925	21.1948	15.6891	3.58405	5.3091
						2016	10	20	293	23.4	17.6	20.5	43.5	42.198	19.5799	16.2602	3.65252	4.23943
						2016	10	21	294	22.9	15.9	19.4	43	40.1371	22.4768	16.9908	3.70703	4.72439
						2016	10	22	295	23.3	16.6	19.95	41.5	39.6752	21.2659	16.4315	3.63799	4.63474
						2016	10	23	296	25	16.8	20.9	35.5	36.2224	23.7619	16.596	3.76689	5.63202
						2016	10	24	297	25.1	18.3	21.7	31	36.4029	19.8032	15.1883	3.51865	5.10218
						2016	10	25	298	24.4	18.1	21.25	29.5	34.7161	17.4969	13.9419	3.19308	4.60181
						2016	10	26	299	20	15.3	17.65	30.5	28.4411	10.6938	9.86541	2.05116	2.73911
						2016	10	27	300	22.7	13	17.85	29	29.823	23.1427	14.8613	3.10732	5.5255
						2016	10	28	301	23.5	14.3	18.9	32	28.1915	20.7489	13.6814	2.94487	4.96231
						2016	10	29	302	21.1	13.8	17.45	32	6.12607	3.57763	2.64828	0.547508	1.18776
						2016	10	30	303	19.8	11.8	15.8	34.5	32.6422	20.891	14.7722	2.91106	4.4638
						2016	10	31	304	19.3	12.9	16.1	30	25.7186	13.1679	10.4101	2.06978	3.14823
						2016	11	1	305	16.1	11.7	13.9	62	18.3314	6.45267	6.15238	1.14385	1.27371
						2016	11	2	306	13.7	7.1	10.4	79.5	4.10706	2.16853	1.6882	0.279216	0.540532
						2016	11	3	307	10.9	5.4	8.15	74	43.0658	18.949	16.1597	2.45946	2.29611
						2016	11	4	308	15.1	5.4	10.25	76	31.6069	24.5269	15.7502	2.59112	3.34952
						2016	11	5	309	17.3	8.5	12.9	75	32.6518	22.9869	15.4978	2.79046	3.59436
						2016	11	6	310	16.2	9.4	12.8	75	37.0662	20.164	15.4651	2.77551	3.1764
						2016	11	7	311	16.1	9.4	12.75	66.5	37.3317	20.0098	15.4609	2.77022	3.14773
						2016	11	8	312	19.2	10.2	14.7	61	26.5866	19.1423	12.7616	2.43251	3.25777
						2016	11	9	313	19.3	13.3	16.3	66.5	34.3309	16.4788	13.4549	2.69094	2.99771
						2016	11	10	314	20.1	13.5	16.8	69	0	0	0	0	0.342287
						2016	11	11	315	19.5	13.2	16.35	62	0	0	0	0	0.3379
						2016	11	12	316	21	13.2	17.1	54.5	29.6558	18.5052	13.2519	2.7125	3.4011
						2016	11	13	317	20.3	13.7	17	52.5	32.6171	17.2219	13.4072	2.73643	3.18042
						2016	11	14	318	20.9	13.9	17.4	73	26.2118	14.6786	11.096	2.29074	2.79166
						2016	11	15	319	20.5	14.9	17.7	67.5	24.7286	11.0784	9.36297	1.94944	2.20964
						2016	11	16	320	19.5	13.7	16.6	58	18.4613	8.56604	7.11371	1.43523	1.73532
						2016	11	17	321	15.7	11.2	13.45	55.5	23.9899	8.63638	8.14246	1.49236	1.57201
						2016	11	18	322	12.8	5.7	9.25	71.5	32.4622	18.4385	13.8397	2.19565	2.42745
						2016	11	19	323	10.6	3	6.8	67.5	32.2286	19.595	14.2157	2.05103	2.09688
						2016	11	20	324	12.4	5.6	9	73.5	34.3768	18.701	14.343	2.25446	2.41695
						2016	11	21	325	13.8	7.3	10.55	79.5	34.3728	17.8739	14.0214	2.33138	2.55545
						2016	11	22	326	12.8	7	9.9	85	35.6643	16.5482	13.7426	2.23263	2.29722
						2016	11	23	327	11.5	3.2	7.35	68.5	30.5962	20.3159	14.1035	2.08033	2.2842
						2016	11	24	328	12.6	6.9	9.75	70	35.0343	15.9756	13.3829	2.16242	2.2062
						2016	11	25	329	12.9	6.2	9.55	64	31.6176	16.947	13.0944	2.10045	2.29569
						2016	11	26	330	13.5	7.3	10.4	68.5	31.9177	15.8312	12.7159	2.10312	2.27472
						2016	11	27	331	13.2	7.5	10.35	50	32.9462	15.0235	12.5853	2.07783	2.16602
						2016	11	28	332	13.3	6.2	9.75	65	28.3227	16.0873	12.0749	1.95107	2.21983
						2016	11	29	333	12.7	7	9.85	93.5	31.6474	14.4312	12.0891	1.96046	2.03008
						2016	11	30	334	12.5	5.8	9.15	79	28.0852	15.0537	11.6315	1.83849	2.01358
						2016	12	1	335	8.9	2.2	5.55	83	1.32136	0.708249	0.547241	0.0749434	0.234277
						2016	12	2	336	8.7	3.6	6.15	59	13.6909	5.58588	4.94694	0.694881	0.691918
						2016	12	3	337	8.9	4.6	6.75	46	4.51785	1.55414	1.49895	0.215827	0.370625
						2016	12	4	338	6	4	5	74	22.4362	3.5898	5.07674	0.678871	0.440184
						2016	12	5	339	10.4	4.5	7.45	96.5	16.4027	7.74206	6.37471	0.944038	1.01145
						2016	12	6	340	9.8	5.2	7.5	90	31.2742	11.5089	10.7321	1.59248	1.40522
						2016	12	7	341	6.4	-1.3	2.55	89.5	28.5331	17.5764	12.6682	1.51198	0.885828
						2016	12	8	342	9.3	1.7	5.5	85	27.9551	16.9967	12.3307	1.68505	1.58746
						2016	12	9	343	3.5	-0.2	1.65	83.5	39.302	11.6334	12.0958	1.37982	0.421592
						2016	12	10	344	5	-2.3	1.35	94.5	28.5354	16.6647	12.3357	1.38549	0.480051
						2016	12	11	345	8.2	1.5	4.85	94	26.3635	14.1308	10.9184	1.45043	1.22862
						2016	12	12	346	7.4	1.3	4.35	79.5	25.7511	12.5665	10.1761	1.32197	1.02141
						2016	12	13	347	7.9	2.6	5.25	78	20.1639	8.54949	7.42732	1.00409	0.855099
						2016	12	14	348	5.8	2.7	4.25	75.5	2.51925	0.624775	0.709696	0.0917803	0.185803
						2016	12	15	349	4.8	0.6	2.7	65	0.688251	0.231252	0.225679	0.027134	0.109768
						2016	12	16	350	0.8	-3.3	-1.25	57.5	25.9588	8.51448	8.41001	0.816324	-0.298854
						2016	12	17	351	0.3	-1.1	-0.4	62	9.90825	1.10972	1.87578	0.191425	-0.0271757
						2016	12	18	352	0.5	-2.5	-1	63.5	29.3876	7.05303	8.14413	0.802458	-0.202453
						2016	12	19	353	-0.5	-4	-2.25	62	21.3174	5.96887	6.38099	0.581951	-0.440867
						2016	12	20	354	-0.9	-5.5	-3.2	65.5	18.5947	6.84285	6.38099	0.546398	-0.750965
						2016	12	21	355	0	-5	-2.5	63	33.8077	13.5231	12.0954	1.08538	-0.968011
						2016	12	22	356	1.4	-3.9	-1.25	54.5	14.4577	6.13005	5.32545	0.516918	-0.231656
						2016	12	23	357	7.7	-0.3	3.7	63	21.3075	13.6368	9.64266	1.21592	0.964632
						2016	12	24	358	9.4	3.3	6.35	88.5	22.7229	11.0888	8.97944	1.27185	1.2151
						2016	12	25	359	9.7	4.5	7.1	63.5	1.87858	0.78149	0.685412	0.100097	0.28598
						2016	12	26	360	5.7	4	4.85	62	5.91679	0.804683	1.23433	0.163971	0.219252
						2016	12	27	361	4.6	2.7	3.65	65.5	4.89428	0.743931	1.07941	0.135794	0.171935
						2016	12	28	362	7.5	3.4	5.45	63	16.2388	5.32632	5.26097	0.717392	0.612708
						2016	12	29	363	8.2	3.2	5.7	54.5	27.6449	11.058	9.89053	1.36319	1.12234
						2016	12	30	364	5.7	3.2	4.45	63	23.7368	4.74737	6.005	0.783629	0.484943
						2016	12	31	365	9.7	3	6.35	88.5	27.0965	14.5237	11.222	1.58948	1.53181
										10.6	4.4					11.2082
																	1436.45	2130.73
																	ETo-HS	ETo-TURC (Ousman Couly (2016)

## Sheet: 2017
	MARDİN PROVİNCE					year	month	day	DOY	Tmax	Tmin	Tmean	Rhmean	Ra	Rs=0.16(Tmax-Tmin)^0.5*Ra	Rs=from meteorological station	ETo-HS	ETo-TURC (Ousman Couly (2016)
	DOY	246					#	#		°C	°C	°C	%	MJ m-2 day-1*(0.408 mm day-1)
	φ (-)	37.31	0.651182			2017	1	1	1	8.4	1.9	5.15	77	29.447	15.3125	12.0121	1.61685	1.37881
	tan(φ)		0.762072			2017	1	2	2	7.4	1.7	4.55	84	30.7025	14.0004	11.7282	1.53737	1.16089
	sin(φ)		0.606127			2017	1	3	3	5.1	0.1	2.6	82	12.8476	5.13903	4.59649	0.549951	0.331057
	cos(φ)		0.795368			2017	1	4	4	3.7	-1.3	1.2	84	30.8199	12.328	11.0265	1.22873	0.331079
	dr	0.984766		(1+0.033*cos(2*3.14/365*DOY))		2017	1	5	5	4.8	0	2.4	81.5	17.4614	6.70519	6.12098	0.72517	0.37607
	δ	0.120494		(0.409*sin(2*3.14/365*DOY-1.39))		2017	1	6	6	10.3	2.8	6.55	75.5	26.4677	15.8806	11.5976	1.65628	1.69324
	tan(δ)	0.121081				2017	1	7	7	8.8	4.2	6.5	66.5	31.2218	11.4896	10.7141	1.52697	1.27269
	sin(δ)	0.120203				2017	1	8	8	8.1	4.3	6.2	79	33.8574	10.2926	10.56	1.48643	1.12262
	cos(δ)	0.992749				2017	1	9	9	6	1	3.5	84	21.8507	8.74028	7.81755	0.976603	0.635182
	X	0.991486				2017	1	10	10	7.8	0.5	4.15	77	30.3253	17.71	13.1095	1.68767	1.33016		-
	ωs (eq. 25)	1.49187		(acos{(-1*tan(-0.35)*tan(0.409*sin(2*3.14/365*DOY-1.39))))		2017	1	11	11	8.8	1.1	4.95	60.5	23.7848	14.6515	10.56	1.40901	1.28771
	sin ωs	0.996887				2017	1	12	12	8.6	1.8	5.2	63.5	30.6447	16.6707	12.7858	1.72475	1.49714
	sin φ*sin δ	-0.0728584		(sin(0.35)*sin(0.409*sin(2*3.14/365*DOY-1.39)))		2017	1	13	13	5.4	0.4	2.9	60	22.684	9.07359	8.11566	0.985286	0.560674
	cos φ*cos δ	0.789601		(cos(0.35)*cos(0.409*sin(2*3.14/365*DOY-1.39))		2017	1	14	14	6.7	-2.4	2.15	50.5	21.2586	15.4763	10.2607	1.20057	0.682677
	Gsc	0.082				2017	1	15	15	3.9	-0.3	1.8	56	4.78839	1.6089	1.57012	0.180492	0.122856
						2017	1	16	16	7.4	0.2	3.8	72	27.3714	15.7659	11.7512	1.48869	1.11885
	Ra	25.1244				2017	1	17	17	10.5	3.1	6.8	66.5	26.1246	15.4657	11.3706	1.64054	1.69759
						2017	1	18	18	11	4.5	7.75	65	30.416	15.8163	12.4073	1.85925	1.89099
						2017	1	19	19	9.2	4.2	6.7	53.5	35.1886	14.0755	12.5895	1.80901	1.54727
						2017	1	20	20	9.9	2.8	6.35	55.5	27.1343	15.4123	11.5683	1.63853	1.61374
						2017	1	21	21	8.3	0.8	4.55	53.5	24.5174	14.7105	10.743	1.40822	1.21213
						2017	1	22	22	6.1	-0.7	2.7	28.5	33.3171	18.1245	13.9008	1.67133	1.2495
						2017	1	23	23	6.3	-0.2	3.05	33	35.4126	18.4146	14.4456	1.76648	1.33492
						2017	1	24	24	8.9	1.2	5.05	33.5	32.1592	19.81	14.2781	1.91348	2.11301
						2017	1	25	25	4.5	0.7	2.6	47	7.02359	2.13517	2.19064	0.262101	0.201786
						2017	1	26	26	7.6	2.4	5	76.5	19.8657	8.26412	7.24812	0.969233	0.802445
						2017	1	27	27	4.8	1.7	3.25	77.5	2.3305	0.577963	0.656522	0.081053	0.147286
						2017	1	28	28	1.7	-4.4	-1.35	63.5	11.4886	5.60644	4.53996	0.438012	-0.235968
						2017	1	29	29	-1.6	-3.9	-2.75	38	59.4613	10.9409	14.4284	1.27357	-1.0623
						2017	1	30	30	-0.2	-3.6	-1.9	57	17.4661	4.75078	5.15294	0.48053	-0.307574
						2017	1	31	31	1.6	-5.5	-1.95	59	10.8669	6.17239	4.63292	0.430677	-0.382729
						2017	2	1	32	-2.5	-9.9	-6.2	33	20.9549	12.4053	9.12054	0.620507	-3.93476
						2017	2	2	33	-0.8	-6.2	-3.5	22	33.6328	14.5294	12.5049	1.04878	-2.1952
						2017	2	3	34	4.5	-3.2	0.65	35.5	36.7622	22.6455	16.3218	1.76617	0.384451
						2017	2	4	35	5.6	-1.9	1.85	60	28.698	17.2188	12.5748	1.44921	0.657186
						2017	2	5	36	2.9	-0.1	1.4	51	9.08476	2.18034	2.51764	0.283507	0.113008
						2017	2	6	37	4.8	-1.2	1.8	57.5	28.7136	13.7825	11.2534	1.29362	0.527195
						2017	2	7	38	6.8	0.9	3.85	56.5	41.3918	19.5369	16.0865	2.04261	1.36932
						2017	2	8	39	11.1	4.7	7.9	48.5	34.4955	17.6617	13.9628	2.10462	2.15758
						2017	2	9	40	7.5	3.1	5.3	54.5	13.0743	4.60215	4.38798	0.59449	0.541635
						2017	2	10	41	6.6	1.4	4	58	37.7564	15.7067	13.7756	1.76131	1.16147
						2017	2	11	42	7.8	1.4	4.6	54.5	41.3009	21.1461	16.7174	2.19627	1.69054
						2017	2	12	43	8	1.5	4.75	56.5	23.9044	12.4303	9.7511	1.28964	1.08259
						2017	2	13	44	4.2	0.6	2.4	53	26.5485	7.64597	8.05956	0.95484	0.416296
						2017	2	14	45	7.2	-0.9	3.15	49	31.5206	20.4253	14.3535	1.76363	1.22867
						2017	2	15	46	3.3	-2.2	0.55	48.5	29.4336	12.9508	11.0445	1.18864	0.168451
						2017	2	16	47	2	-3.7	-0.85	21.5	46.575	21.2382	17.7914	1.76867	-0.611285
						2017	2	17	48	0.1	-6.2	-3.05	25.5	47.7276	24.0547	19.1672	1.65813	-2.79262
						2017	2	18	49	5.7	-5.8	-0.05	28.5	34.8156	32.0304	18.8905	1.96657	-0.046241
						2017	2	19	50	7.7	-0.5	3.6	25.5	40.4489	26.5345	18.5325	2.32603	2.31858
						2017	2	20	51	10.5	2.8	6.65	28	41.0333	25.2765	18.2181	2.61246	3.4248
						2017	2	21	52	10.8	3.6	7.2	27.5	41.5565	23.9365	17.8412	2.61597	3.45781
						2017	2	22	53	11.5	4.8	8.15	36	42.3108	22.6786	17.523	2.66695	3.24378
						2017	2	23	54	12.5	5.3	8.9	45.5	41.3907	23.841	17.77	2.78271	3.1859
						2017	2	24	55	13.9	6.8	10.35	60.5	43.331	24.612	18.4735	3.04996	3.37962
						2017	2	25	56	14.2	7.9	11.05	52	45.5392	22.9518	18.2884	3.09449	3.29292
						2017	2	26	57	15.3	8.4	11.85	39	39.6618	21.8933	16.6693	2.89874	3.79692
						2017	2	27	58	16.1	8.7	12.4	30.5	37.7251	22.3333	16.4197	2.90831	4.38088
						2017	2	28	59	16.8	9.8	13.3	25.5	37.7712	21.1519	15.9893	2.91648	4.57122
						2017	3	1	60	15.7	11.2	13.45	37	32.2502	11.6101	10.9461	2.00621	2.3807
						2017	3	2	61	14.1	5.8	9.95	57.5	6.34832	4.21529	2.92629	0.476265	0.779505
						2017	3	3	62	8.7	5.9	7.3	83.5	6.41817	1.43767	1.71834	0.25296	0.357987
						2017	3	4	63	8.6	5.5	7.05	72.5	19.5461	4.84744	5.50632	0.802521	0.687609
						2017	3	5	64	13.2	4.5	8.85	49.5	42.049	29.2661	19.8443	3.10171	3.6327
						2017	3	6	65	15.7	7.6	11.65	41.5	44.2259	28.6584	20.1391	3.4785	4.67287
						2017	3	7	66	15.4	8.7	12.05	40	45.366	24.3162	18.7883	3.28928	4.16753
						2017	3	8	67	16.5	9.5	13	39.5	43.6187	24.4265	18.4647	3.33549	4.38895
						2017	3	9	68	16.9	10.2	13.55	35.5	43.9426	23.5532	18.1988	3.34617	4.55434
						2017	3	10	69	18.3	12.1	15.2	32	46.2613	22.9456	18.4303	3.5671	4.91067
						2017	3	11	70	14.9	8.9	11.9	60	22.8421	10.9642	8.95222	1.55939	1.79022
						2017	3	12	71	14.4	6.4	10.4	70	38.2008	24.4485	17.2877	2.85927	3.36851
						2017	3	13	72	12.7	5.2	8.95	77	32.0672	19.2403	14.0512	2.20447	2.47102
						2017	3	14	73	11.9	5.5	8.7	70	41.4685	21.2319	16.7853	2.60881	2.65397
						2017	3	15	74	9.6	3.5	6.55	65.5	39.7413	19.3937	15.7046	2.24282	2.02426
						2017	3	16	75	9	2.6	5.8	54	22.2295	11.3815	8.99786	1.24543	1.16451
						2017	3	17	76	7.9	3.2	5.55	73	27.0674	10.1774	9.38893	1.28579	1.02706
						2017	3	18	77	7	2.7	4.85	59.5	5.97669	2.05598	1.98296	0.263421	0.314029
						2017	3	19	78	12.3	3	7.65	40	28.1871	20.9712	13.7535	2.0529	2.75949
						2017	3	20	79	12.4	6.8	9.6	56.5	52.5093	23.5242	19.8816	3.19499	3.09869
						2017	3	21	80	10.3	3.1	6.7	60	43.7313	25.1892	18.7749	2.69782	2.61101
						2017	3	22	81	6.6	3.2	4.9	67.5	15.4026	4.1895	4.54415	0.604988	0.479325
						2017	3	23	82	11.8	1.7	6.75	53	32.4049	26.1832	16.4775	2.37253	2.72008
						2017	3	24	83	14.6	5.6	10.1	30.5	48.7524	35.1017	23.4011	3.82921	5.93172
						2017	3	25	84	15.9	7	11.45	28	52.2518	37.2033	24.9411	4.27868	6.93026
						2017	3	26	85	15.8	9.6	12.7	44.5	57.2081	28.3752	22.7915	4.077	4.67023
						2017	3	27	86	17.3	9	13.15	46	41.1764	27.3412	18.9805	3.44538	4.50557
						2017	3	28	87	16.4	9.3	12.85	61.5	55.0661	31.2775	23.4765	4.22019	4.7727
						2017	3	29	88	15.5	8.5	12	54	37.1827	20.8223	15.7402	2.75102	3.15681
						2017	3	30	89	17.5	11.4	14.45	43.5	58.4899	28.5431	23.1135	4.37183	5.09211
						2017	3	31	90	15.1	9.5	12.3	72	37.2278	16.6781	14.0955	2.48838	2.62134
						2017	4	1	91	10.2	6.6	8.4	73	16.3244	4.70142	4.95573	0.761513	0.755763
						2017	4	2	92	13.5	6.3	9.9	68	34.915	20.111	14.9899	2.43526	2.73634
						2017	4	3	93	11.5	6	8.75	46.5	31.8204	14.001	11.9401	1.85926	1.92965
						2017	4	4	94	15.4	6.1	10.75	52.5	54.6065	40.6272	26.6444	4.46149	5.52836
						2017	4	5	95	17.3	11	14.15	39.5	66.5567	33.5446	26.729	5.00865	6.16665
						2017	4	6	96	18.2	11.6	14.9	36	58.2944	30.7795	23.9618	4.59552	6.09327
						2017	4	7	97	18.5	11.1	14.8	49	41.3931	24.5047	18.0162	3.44469	4.15301
						2017	4	8	98	13.7	8.8	11.25	71	50.815	19.9195	17.9974	3.06637	2.92412
						2017	4	9	99	10.8	5.1	7.95	60	27.2323	12.4179	10.4026	1.57104	1.55794
						2017	4	10	100	12.7	4.4	8.55	32.5	59.4829	39.4967	27.419	4.23741	5.85061
						2017	4	11	101	13.3	7.4	10.35	39	51.6417	24.3749	20.07	3.31355	3.87598
						2017	4	12	102	17.1	6.1	11.6	31.5	27.891	24.5441	14.8006	2.55209	4.55219
						2017	4	13	103	17.5	12.8	15.15	50.5	10.2275	3.84556	3.54765	0.685589	0.924588
						2017	4	14	104	15.9	11.6	13.75	75	26.4648	9.10388	8.78056	1.62476	1.65961
						2017	4	15	105	15.8	9.1	12.45	68.5	43.8212	23.4882	18.1486	3.21985	3.59632
						2017	4	16	106	16.7	9.3	13	64.5	48.1953	28.5316	20.9769	3.7893	4.40733
						2017	4	17	107	18.2	12	15.1	58.5	55.4992	27.5276	22.1107	4.26645	4.60598
						2017	4	18	108	15.6	8.7	12.15	46	7.98576	4.40814	3.3563	0.589557	0.952995
						2017	4	19	109	16.3	7.6	11.95	58.5	56.9567	39.6419	26.8797	4.69007	5.73639
						2017	4	20	110	18.1	11	14.55	58.5	59.6152	33.8614	25.4159	4.82223	5.48761
						2017	4	21	111	18.7	13	15.85	47	65.7204	29.9685	25.1048	4.95462	5.3248
						2017	4	22	112	22.3	14.5	18.4	29	58.6885	36.6216	26.2253	5.56797	8.59444
						2017	4	23	113	21.9	14.4	18.15	40	25.3478	15.2087	11.1069	2.34184	3.35552
						2017	4	24	114	16.9	7.3	12.1	49	57.2862	43.9958	28.3992	4.98018	6.47001
						2017	4	25	115	16.7	8.1	12.4	39	64.3989	44.3064	30.2167	5.35208	7.5319
						2017	4	26	116	20.7	10.8	15.75	22.5	57.3647	45.4328	28.879	5.68254	10.5101
						2017	4	27	117	22.4	16.1	19.25	16.5	69.3582	34.9565	27.854	6.05263	9.5438
						2017	4	28	118	23.6	17.4	20.5	27	60.4566	29.9865	24.0857	5.41036	7.62884
						2017	4	29	119	23.5	15.8	19.65	23.5	61.5099	37.8901	27.3093	5.99833	9.68934
						2017	4	30	120	24.8	15	19.9	25.5	28.4484	22.3035	14.2492	3.15065	5.821
						2017	5	1	121	25.8	17.1	21.45	25.5	45.5925	31.7324	21.5166	4.95314	8.3297
						2017	5	2	122	20.9	11.6	16.25	58.5	8.26014	6.14554	4.03041	0.804885	1.32757
						2017	5	3	123	19.3	11.2	15.25	72	61.5764	39.9015	28.0399	5.43521	6.56247
						2017	5	4	124	18.8	13.1	15.95	59	59.3258	27.0526	22.6621	4.48583	4.65575
						2017	5	5	125	21.6	14.7	18.15	62	52.4992	28.9796	22.0647	4.65226	5.27339
						2017	5	6	126	22.5	11.9	17.2	65	48.6134	41.2242	25.3238	5.19835	7.1724
						2017	5	7	127	19.6	12.5	16.05	58.5	36.0763	20.4913	15.3805	3.0535	3.61847
						2017	5	8	128	20.8	12.3	16.55	57.5	60.198	40.9347	28.081	5.65727	6.99645
						2017	5	9	129	23.4	15.6	19.5	41	62.4383	38.9615	27.9009	6.10373	8.11774
						2017	5	10	130	26.4	20.1	23.25	24	47.0551	23.7158	18.8972	4.54965	6.66873
						2017	5	11	131	26.3	19.8	23.05	34	70.6784	36.7528	28.8313	6.90755	8.96167
						2017	5	12	132	24.8	15.1	19.95	34	62.8869	48.8002	31.3376	6.93826	11.0635
						2017	5	13	133	26.1	16.4	21.25	31	59.5596	46.2182	29.6795	6.79746	11.1616
						2017	5	14	134	28.5	20.7	24.6	28.5	57.4975	35.8785	25.6931	6.38926	9.55758
						2017	5	15	135	25.9	20	22.95	32.5	72.3786	34.1627	28.1291	6.72282	8.49538
						2017	5	16	136	24.4	14.6	19.5	27	61.7719	48.4292	30.9403	6.76863	11.7603
						2017	5	17	137	25.8	14.2	20	24.5	57.1415	53.0273	31.1387	6.90336	13.3204
						2017	5	18	138	28.7	20.4	24.55	28	60.78	40.3579	28.0169	6.95891	10.7353
						2017	5	19	139	29.5	18.9	24.2	37.5	27.6761	23.4693	14.4171	3.55136	5.76496
						2017	5	20	140	24.4	12.5	18.45	65	42.501	40.4609	23.4581	4.98734	7.27564
						2017	5	21	141	18.6	10	14.3	59.5	41.7315	28.7113	19.5809	3.68643	4.66014
						2017	5	22	142	21.2	13	17.1	59.5	62.6601	41.105	28.709	5.8764	7.13324
						2017	5	23	143	21.5	11.4	16.45	62.5	21.5259	17.3929	10.9457	2.19872	3.15908
						2017	5	24	144	21.2	9.9	15.55	53.5	45.3025	40.9534	24.3658	4.7659	6.79185
						2017	5	25	145	23.6	14.8	19.2	46.5	63.2483	44.5268	30.02	6.51448	8.5186
						2017	5	26	146	25.1	17.3	21.2	38	40.9081	25.5267	18.28	4.18128	5.87322
						2017	5	27	147	25.1	16.1	20.6	45.5	63.7759	45.9186	30.6124	6.89441	9.1655
						2017	5	28	148	27.2	16.4	21.8	36	56.226	48.5793	29.5644	6.86645	11.166
						2017	5	29	149	30.2	22.8	26.5	35	66.9174	39.6151	29.1256	7.5674	10.0247
						2017	5	30	150	28.9	20.8	24.85	31.5	66.8248	43.3024	30.4299	7.61179	11.094
						2017	5	31	151	26.1	17.8	21.95	47	69.1049	45.8856	31.8543	7.42631	9.21356
						2017	6	1	152	25.1	15.7	20.4	50.5	44.9683	33.8161	22.0592	4.94221	6.41442
						2017	6	2	153	25.8	14	19.9	34.5	57.7712	54.536	31.7521	7.02073	12.2257
						2017	6	3	154	28.8	17.3	23.05	35.5	57.053	52.4887	30.9562	7.41664	12.3726
						2017	6	4	155	31.4	23	27.2	34	52.8977	35.5473	24.53	6.47407	9.23925
						2017	6	5	156	32.8	24.7	28.75	35	63.2636	40.9948	28.8082	7.8651	10.6578
						2017	6	6	157	34.2	26.4	30.3	47.5	65.4582	40.8459	29.2504	8.25172	9.22077
						2017	6	7	158	31.9	21.2	26.55	38.5	58.7161	50.261	30.7305	7.99339	12.0737
						2017	6	8	159	32.4	21.7	27.05	30.5	59.7354	51.1335	31.2639	8.22382	13.5704
						2017	6	9	160	34.9	24.5	29.7	24	59.4134	49.4319	30.6564	8.54048	14.5538
						2017	6	10	161	32.7	26.4	29.55	49	75.3843	37.9937	30.2741	8.40735	8.35987
						2017	6	11	162	30.9	20.2	25.55	49.5	59.7162	51.117	31.2539	7.94622	10.467
						2017	6	12	163	32.3	21.7	27	40.5	59.6958	50.622	31.0968	8.17076	11.9304
						2017	6	13	164	33.6	23.7	28.65	47.5	60.7854	48.1421	30.6011	8.33664	10.5858
						2017	6	14	165	29.6	21.3	25.45	52.5	62.614	41.5757	28.8622	7.32123	8.51669
						2017	6	15	166	28.5	17.5	23	40.5	58.8615	51.7981	31.2354	7.47439	11.4833
						2017	6	16	167	30.7	21.2	25.95	36	61.2301	46.5349	30.1958	7.74806	11.4626
						2017	6	17	168	30.6	19.8	25.2	35.5	58.7224	50.7361	30.877	7.78703	12.3921
						2017	6	18	169	30.5	23.2	26.85	52.5	68.7679	40.1605	29.7281	7.78497	8.40315
						2017	6	19	170	30.2	20.6	25.4	52	60.9255	46.7908	30.2033	7.65256	9.52692
						2017	6	20	171	28.2	20.7	24.45	56.5	71.3679	42.8208	31.2719	7.74905	8.62867
						2017	6	21	172	29.4	18.8	24.1	50.5	56.7339	48.1103	29.5539	7.26269	9.59199
						2017	6	22	173	29.1	17.8	23.45	47	56.971	51.5018	30.6417	7.41319	10.5665
						2017	6	23	174	30.3	19.1	24.7	32	58.4907	52.4077	31.3196	7.8068	13.2139
						2017	6	24	175	33.1	21.3	27.2	30	56.7641	53.5853	31.1986	8.23409	14.3029
						2017	6	25	176	34.2	23.9	29.05	24	57.683	47.5308	29.6201	8.13887	13.9123
						2017	6	26	177	37.1	25.5	31.3	23.5	55.1208	51.1521	30.0375	8.64995	15.3819
						2017	6	27	178	38	29.2	33.6	32.5	64.1181	45.1391	30.4328	9.1743	12.6527
						2017	6	28	179	36.6	29.2	32.9	36	69.6023	41.2046	30.2942	9.00815	11.0621
						2017	6	29	180	37.9	28.1	33	37	59.3268	46.5122	29.7156	8.85351	12.282
						2017	6	30	181	36.6	26.9	31.75	32.5	59.8998	46.4823	29.8491	8.67448	12.7827
						2017	7	1	182	35.7	25.2	30.45	12	56.6432	47.5803	29.3672	8.31051	15.9161
						2017	7	2	183	37.8	27.1	32.45	12.5	54.6841	46.8096	28.6202	8.43485	15.9205
						2017	7	3	184	39.9	31	35.45	12.5	54.614	38.8852	26.0687	8.14154	13.7072
						2017	7	4	185	39.6	31.1	35.35	21.5	60.1577	40.9072	28.0621	8.74765	13.1683
						2017	7	5	186	39.6	27.7	33.65	31	55.1733	52.525	30.4525	9.18916	14.8891
						2017	7	6	187	37.7	29.5	33.6	50.5	65.8211	43.1787	30.1573	9.09125	9.70202
						2017	7	7	188	36	27.4	31.7	42	51.8659	35.6837	24.3361	7.0652	8.85708
						2017	7	8	189	34.8	21.9	28.35	25.5	54.4576	56.2003	31.2949	8.47058	15.9535
						2017	7	9	190	35.1	25.1	30.1	22.5	62.202	49.7616	31.472	8.84154	14.9424
						2017	7	10	191	37.5	26.2	31.85	25.5	56.4891	51.0662	30.3825	8.84731	15.1234
						2017	7	11	192	37	27	32	25.5	57.543	46.0344	29.1147	8.50374	13.7124
						2017	7	12	193	38.4	27.8	33.1	23	57.6156	48.858	30.0133	8.95981	15.0607
						2017	7	13	194	37.8	28.4	33.1	25.5	60.1107	45.2033	29.4874	8.80282	13.62
						2017	7	14	195	37.8	25.7	31.75	27	48.8009	47.2392	27.1607	7.89318	13.7979
						2017	7	15	196	37.7	27.2	32.45	30.5	54.4635	45.7494	28.2371	8.32194	12.9673
						2017	7	16	197	37.8	27.5	32.65	45	56.9467	46.9241	29.242	8.6524	11.1549
						2017	7	17	198	38.9	29.3	34.1	35.5	59.5066	45.7011	29.4999	8.97959	12.4205
						2017	7	18	199	39.6	31.1	35.35	27.5	60.68	41.2624	28.3058	8.82362	12.4683
						2017	7	19	200	38	31.4	34.7	44	70.1705	37.05	28.8434	8.88125	9.19753
						2017	7	20	201	37.4	27.5	32.45	36.5	58.8226	46.5875	29.613	8.72743	12.31
						2017	7	21	202	38.4	30.1	34.25	50.5	63.0109	41.8392	29.0452	8.86673	9.47043
						2017	7	22	203	38.1	30.8	34.45	47	63.1998	36.9087	27.321	8.37242	8.78333
						2017	7	23	204	38.1	28.1	33.1	37	57.9493	46.3595	29.3203	8.75295	12.255
						2017	7	24	205	35.2	26.5	30.85	32.5	62.7457	43.671	29.6117	8.44918	11.9312
						2017	7	25	206	35.8	26.4	31.1	31	59.41	44.6763	29.1436	8.35834	12.435
						2017	7	26	207	37.1	25.5	31.3	30.5	53.6494	49.7866	29.2357	8.41906	13.9002
						2017	7	27	208	38.8	28	33.4	25.5	53.9016	46.571	28.3422	8.51083	14.0533
						2017	7	28	209	38.3	30.4	34.35	42.5	61.3994	38.8045	27.612	8.4454	9.76943
						2017	7	29	210	34.9	28.2	31.55	42.5	68.6015	36.7704	28.4113	8.2233	9.03967
						2017	7	30	211	38	27.3	32.65	37.5	53.9521	46.183	28.2371	8.35506	12.0849
						2017	7	31	212	38.7	29.3	34	41.5	58.1041	43.6943	28.503	8.65941	11.0442
						2017	8	1	213	40.5	31.9	36.2	32.5	59.2001	40.7297	27.7774	8.79738	11.7315
						2017	8	2	214	40.8	32.3	36.55	49.5	59.813	40.6728	27.9013	8.8939	9.46625
						2017	8	3	215	36.9	30.5	33.7	53	69.7493	35.7116	28.2325	8.52756	8.10911
						2017	8	4	216	35.7	28	31.85	48.5	65.9536	40.6274	29.2822	8.5269	9.19548
						2017	8	5	217	35.3	25.8	30.55	43.5	58.5302	44.4829	28.8643	8.18514	10.5823
						2017	8	6	218	37.4	27.5	32.45	39.5	56.8565	45.0303	28.6232	8.43571	11.4881
						2017	8	7	219	37.6	28.4	33	15.5	58.5839	43.1177	28.431	8.47078	14.3835
						2017	8	8	220	38.3	29.5	33.9	34.5	57.8345	40.7155	27.4504	8.32352	11.2362
						2017	8	9	221	40.4	29.6	35	54	52.8497	45.6622	27.7891	8.60551	10.3622
						2017	8	10	222	41.1	30.9	36	50	52.8571	43.1314	27.0099	8.52263	9.8955
						2017	8	11	223	38.7	28.9	33.8	51	53.7336	42.1271	26.914	8.1451	9.494
						2017	8	12	224	38.7	29.8	34.25	53.5	56.8999	40.5128	27.1598	8.29116	9.18446
						2017	8	13	225	35.3	28.9	32.1	51	65.8495	33.715	26.654	7.80066	7.56465
						2017	8	14	226	34.5	26.6	30.55	43.5	58.1808	36.7703	26.1646	7.41956	8.82986
						2017	8	15	227	36.1	26.9	31.5	49	49.1729	36.1913	23.8638	6.90009	8.15391
						2017	8	16	228	36.8	29.3	33.05	50.5	54.5923	32.7554	23.9212	7.13414	7.42994
						2017	8	17	229	35.4	28.4	31.9	51.5	57.7517	32.341	24.4475	7.12621	7.25987
						2017	8	18	230	35	27	31	50.5	57.7985	36.991	26.1566	7.48634	8.16454
						2017	8	19	231	34.1	25.7	29.9	48.5	58.828	39.5324	27.28	7.63186	8.77652
						2017	8	20	232	33.8	25.5	29.65	48.5	51.823	34.4105	23.8881	6.64792	7.67487
						2017	8	21	233	36.4	27	31.7	49.5	51.2067	38.5074	25.1195	7.29263	8.60387
						2017	8	22	234	34	26.6	30.3	44.5	58.1182	34.406	25.2958	7.1361	8.16206
						2017	8	23	235	33.9	22.8	28.35	51	46.0088	40.8558	24.5258	6.63838	8.70656
						2017	8	24	236	37	26.5	31.75	50	48.2484	40.5286	25.0148	7.26957	8.9727
						2017	8	25	237	37	28.2	32.6	37.5	41.8765	29.481	19.8761	5.8753	7.89982
						2017	8	26	238	37.4	27.3	32.35	38	44.9325	36.3054	22.8476	6.72017	9.52602
						2017	8	27	239	37.6	27.3	32.45	50	39.7942	32.7904	20.4342	6.0223	7.39472
						2017	8	28	240	34.1	27.6	30.85	53.5	60.2305	31.3199	24.5693	7.01042	6.96871
						2017	8	29	241	35.3	26.5	30.9	52.5	51.229	36.0652	24.3152	6.94503	7.96272
						2017	8	30	242	32.6	25.1	28.85	47	57.2134	34.328	25.0697	6.85912	7.74603
						2017	8	31	243	35.3	25.5	30.4	45	47.7893	37.4668	23.9367	6.76673	8.79759
						2017	9	1	244	35.8	27.3	31.55	39	51.6055	35.0917	24.0727	6.96756	9.03979
						2017	9	2	245	34.7	25.6	30.15	42.5	51.232	37.2969	24.7276	6.95406	9.02706
						2017	9	3	246	35.6	25.7	30.65	22	45.7966	36.2709	23.0553	6.55138	11.1781
						2017	9	4	247	36.3	28.1	32.2	42.5	53.7345	35.2498	24.6196	7.21969	8.74282
						2017	9	5	248	37.8	29.9	33.85	47.5	50.9243	32.1842	22.9012	6.9374	7.6254
						2017	9	6	249	32.2	26.2	29.2	68	52.999	25.4395	20.7713	5.72571	5.63795
						2017	9	7	250	30.2	22.6	26.4	37	54.4465	33.1035	24.0158	6.22569	8.24912
						2017	9	8	251	32.3	20.2	26.25	23	44.2826	42.8655	24.6459	6.36736	12.2892
						2017	9	9	252	36.2	24.9	30.55	40	45.0588	40.7332	24.2348	6.87232	10.1755
						2017	9	10	253	35.6	27.3	31.45	48	48.6756	32.3206	22.4373	6.48104	7.42888
						2017	9	11	254	36.7	27.2	31.95	57.5	43.8013	33.289	21.6007	6.30274	7.46349
						2017	9	12	255	35.4	27.2	31.3	45.5	28.345	18.5943	12.9868	3.73983	4.61343
						2017	9	13	256	34.5	27.8	31.15	54	50.6798	27.1644	20.989	6.02577	6.12123
						2017	9	14	257	37.2	27.1	32.15	47.5	43.6018	35.2303	22.171	6.49514	8.17045
						2017	9	15	258	37.3	28.8	33.05	26	46.0288	31.2996	21.4714	6.40351	9.56051
						2017	9	16	259	37.5	28.4	32.95	55	41.8241	30.4479	20.1868	6.00857	6.93136
						2017	9	17	260	39.3	27.5	33.4	47	37.9126	35.7895	20.8374	6.25723	8.45068
						2017	9	18	261	37.8	29.1	33.45	46	41.703	29.0253	19.681	5.91574	7.03998
						2017	9	19	262	33.8	26.2	30	45	47.1782	28.6843	20.8098	5.83397	6.81432
						2017	9	20	263	36.2	28.8	32.5	55.5	37.7665	22.3577	16.4377	4.84929	5.1855
						2017	9	21	264	34.2	26.7	30.45	58	42.9738	25.7843	18.8302	5.32869	5.78921
						2017	9	22	265	31.8	25.4	28.6	49.5	49.8307	25.5133	20.17	5.48899	5.65319
						2017	9	23	266	26.6	20.5	23.55	46.5	56.3093	27.479	22.2518	5.39646	5.87968
						2017	9	24	267	29.9	20.3	25.1	19	40.8859	31.4004	20.2688	5.09981	9.37636
						2017	9	25	268	32.2	23.1	27.65	15.5	35.3544	25.738	17.0641	4.54868	8.34906
						2017	9	26	269	32.5	25.7	29.1	24	44.8897	24.42	18.7293	5.15184	7.43702
						2017	9	27	270	26.2	20.6	23.4	25.5	53.0014	23.7446	20.0679	4.84916	6.58844
						2017	9	28	271	29	20.9	24.95	57	43.5694	28.233	19.8401	4.97448	5.87066
						2017	9	29	272	29	21.6	25.3	58	45.1035	26.7013	19.6312	4.9624	5.60323
						2017	9	30	273	30	21.6	25.8	53.5	33.3516	22.4123	15.4659	3.95486	4.80317
						2017	10	1	274	25.6	18.7	22.15	23.5	46.6214	25.735	19.5943	4.59108	7.08992
						2017	10	2	275	24.1	14.6	19.35	28.5	35.1064	26.6809	17.3128	3.7722	6.56737
						2017	10	3	276	24.9	15.4	20.15	23	39.3498	29.9059	19.4055	4.31921	7.87914
						2017	10	4	277	21.7	12.6	17.15	26	25.7131	18.7192	12.4107	2.54396	4.62093
						2017	10	5	278	23.2	12.5	17.85	24.5	36.8409	31.5358	19.2816	4.03153	7.72756
						2017	10	6	279	23.8	16.3	20.05	18.5	42.1158	25.2695	18.4542	4.09665	7.03499
						2017	10	7	280	25.2	17	21.1	19	38.1917	25.0538	17.4983	3.99221	7.09627
						2017	10	8	281	26.9	19.2	23.05	23	33.7171	20.7697	14.9698	3.58654	5.94871
						2017	10	9	282	27.1	18.7	22.9	36.5	27.4421	18.4411	12.7255	3.03766	4.58731
						2017	10	10	283	22.6	17.4	20	51.5	28.0158	11.6546	10.2217	2.26613	2.43475
						2017	10	11	284	23.6	14.2	18.9	24.5	30.9678	23.2878	15.1913	3.26985	5.98388
						2017	10	12	285	22.7	14.8	18.75	37.5	39.2034	24.7765	17.6302	3.77931	5.45327
						2017	10	13	286	24	14.7	19.35	52.5	5.80681	4.32027	2.83334	0.617342	1.11942
						2017	10	14	287	24	18.9	21.45	40	6.12758	2.50005	2.21409	0.509685	0.956976
						2017	10	15	288	24	16.2	20.1	45	34.8186	21.7268	15.5589	3.45848	4.52999
						2017	10	16	289	21.5	12	16.75	68.5	35.7355	27.159	17.6231	3.57107	4.78348
						2017	10	17	290	18.7	10.4	14.55	70	2.25811	1.49938	1.04089	0.197491	0.547882
						2017	10	18	291	24.5	18.4	21.45	74	29.2052	14.2521	11.541	2.65676	2.98126
						2017	10	19	292	24	16.9	20.45	81	37.0751	21.0587	15.8063	3.54594	4.13966
						2017	10	20	293	23.9	17.1	20.5	55	39.555	21.5179	16.5035	3.70717	4.22615
						2017	10	21	294	23.9	17	20.45	62	29.6258	16.3534	12.4513	2.79328	3.29823
						2017	10	22	295	23.1	16.3	19.7	75	30.1559	16.4048	12.5819	2.76724	3.25498
						2017	10	23	296	24	15.6	19.8	66	33.0934	22.2387	15.3462	3.3842	4.29109
						2017	10	24	297	24.4	16.9	20.65	62.5	28.7801	17.2681	12.6108	2.84386	3.47604
						2017	10	25	298	25.8	19.2	22.5	76	32.1201	16.9594	13.2029	3.12062	3.54319
						2017	10	26	299	25.2	19	22.1	62.5	36.4085	18.0586	14.505	3.39437	3.7207
						2017	10	27	300	23.5	16.6	20.05	40	35.4507	19.5688	14.8994	3.30753	4.3895
						2017	10	28	301	20.7	10.7	15.7	34.5	8.82228	7.05783	4.46376	0.877029	1.77137
						2017	10	29	302	19.9	12.4	16.15	33	32.5182	19.5109	14.2488	2.83717	4.31489
						2017	10	30	303	18.3	13.2	15.75	31	35.1896	14.3573	12.7151	2.50196	3.32036
						2017	10	31	304	15.2	9.4	12.3	33	9.93151	4.60822	3.82692	0.675591	1.16275
						2017	11	1	305	14.5	10.3	12.4	28	17.7783	5.97352	5.82956	1.03255	1.48678
						2017	11	2	306	16.9	8.6	12.75	27	25.0082	16.6054	11.5276	2.06548	3.53776
						2017	11	3	307	17.9	10.5	14.2	27.5	34.6179	20.4938	15.0673	2.82784	4.49892
						2017	11	4	308	18.7	11.8	15.25	59	34.1278	18.8385	14.3434	2.7803	3.27073
						2017	11	5	309	20	13	16.5	79	30.8506	17.2763	13.0597	2.62721	3.14472
						2017	11	6	310	17.6	13.7	15.65	68.5	10.8288	3.37858	3.42162	0.671267	0.865605
						2017	11	7	311	18.8	13.2	16	73.5	25.015	11.2067	9.47141	1.87758	2.12748
						2017	11	8	312	19.5	12.7	16.1	71	14.9686	8.14291	6.24533	1.24172	1.6422
						2017	11	9	313	18.4	11.3	14.85	65.5	22.7257	12.9082	9.68872	1.85531	2.31304
						2017	11	10	314	17	11.1	14.05	60.5	29.0346	13.7043	11.284	2.10785	2.36806
						2017	11	11	315	16.8	10.8	13.8	62	33.5094	16.0845	13.1329	2.43398	2.69967
						2017	11	12	316	17.7	11.2	14.45	61	33.2848	17.3081	13.5776	2.56815	2.95056
						2017	11	13	317	17.6	10.1	13.85	55.5	31.4108	18.8465	13.7635	2.55488	3.11579
						2017	11	14	318	20.6	12.4	16.5	72.5	27.273	17.8911	12.4957	2.51375	3.24455
						2017	11	15	319	19.3	14.4	16.85	52	33.081	12.9678	11.7165	2.38105	2.46952
						2017	11	16	320	20.6	12.8	16.7	64	28.0929	17.53	12.5535	2.5401	3.20418
						2017	11	17	321	20.5	14.4	17.45	61	30.2912	14.7821	11.9702	2.47474	2.81263
						2017	11	18	322	18.6	13	15.8	51	29.1442	13.0566	11.0348	2.17457	2.4087
						2017	11	19	323	15.7	7.7	11.7	55.5	6.17019	3.94892	2.79231	0.483119	0.820344
						2017	11	20	324	15.3	10.2	12.75	54	24.0445	9.81016	8.68802	1.55668	1.69497
						2017	11	21	325	13.8	7.7	10.75	64	12.1752	5.94149	4.81128	0.805629	1.03942
						2017	11	22	326	9.6	4.2	6.9	87	32.1339	13.8819	11.9476	1.7308	1.55999
						2017	11	23	327	8.1	0.8	4.45	85.5	27.4235	16.0153	11.8551	1.54704	1.28413
						2017	11	24	328	7	1.2	4.1	82.5	27.4529	12.7381	10.5785	1.35873	0.986732
						2017	11	25	329	9.4	3.3	6.35	75	25.3887	12.3897	10.0329	1.42106	1.33505
						2017	11	26	330	10.6	5	7.8	75.5	20.6525	9.25232	7.81964	1.17407	1.20288
						2017	11	27	331	12.5	5.6	9.05	88	25.2982	13.9646	10.6325	1.67435	1.87281
						2017	11	28	332	10.5	6.2	8.35	86	14.8382	5.10435	4.92307	0.755051	0.797541
						2017	11	29	333	9.5	6.3	7.9	84	2.60977	0.668102	0.746961	0.11259	0.29496
						2017	11	30	334	11.6	6.4	9	87	31.7546	13.2099	11.5858	1.82109	1.77861
						2017	12	1	335	10.9	5.8	8.35	75.5	39.4342	16.0891	14.2488	2.18533	2.01528
						2017	12	2	336	14.5	6.8	10.65	79.5	28.6387	17.6415	12.7151	2.12163	2.5397
						2017	12	3	337	15.9	9.1	12.5	77	9.17223	4.98969	3.82692	0.68008	0.997593
						2017	12	4	338	18.4	10.7	14.55	80.5	13.1302	8.08819	5.82956	1.10606	1.55359
						2017	12	5	339	13.8	10	11.9	88	36.9597	11.2358	11.5276	2.00801	1.82746
						2017	12	6	340	10.4	3.6	7	84	36.1129	19.6454	15.0673	2.19157	2.1439
						2017	12	7	341	5.6	0.8	3.2	87	40.9177	15.7124	14.3434	1.76661	0.970329
						2017	12	8	342	2.8	2.1	2.45	77	97.5581	5.46325	13.0597	1.55105	0.32875
						2017	12	9	343	17.1	-1	8.05	84.5	5.02657	7.27848	3.42162	0.518752	1.01427
						2017	12	10	344	15.8	10.7	13.25	92.5	26.2126	10.6947	9.47141	1.72482	1.85888
						2017	12	11	345	15.1	-1	7.05	79.5	9.72797	12.5296	6.24533	0.910227	1.44903
						2017	12	12	346	14.5	-1	6.75	76	15.3809	19.0723	9.68872	1.39504	2.03596
						2017	12	13	347	11.2	10.8	11	60	111.509	3.5683	11.284	1.906	0.742108
						2017	12	14	348	14.3	10.2	12.25	61.5	40.5369	13.2961	13.1329	2.31459	2.14417
						2017	12	15	349	11.2	8	9.6	74.5	47.4382	12.1442	13.5776	2.18193	1.72199
						2017	12	16	350	13.3	8.7	11	71	40.1079	14.7597	13.7635	2.32482	2.20991
						2017	12	17	351	16.9	9.8	13.35	85	29.3097	16.6479	12.4957	2.2829	2.73534
						2017	12	18	352	14	8.2	11.1	89	30.4063	14.1085	11.7165	1.98593	2.1356
						2017	12	19	353	14.1	7.6	10.85	91.5	30.7742	16.0026	12.5535	2.10939	2.35414
						2017	12	20	354	11.4	6.9	9.15	86	35.2676	12.6963	11.9702	1.89203	1.7367
						2017	12	21	355	11.4	7.9	9.65	70.5	36.8648	10.3221	11.0348	1.77655	1.50633
						2017	12	22	356	12.3	10.2	11.25	73	12.043	2.02322	2.79231	0.475749	0.546471
						2017	12	23	357	15.4	10.9	13.15	81	25.5973	9.21504	8.68802	1.57707	1.63712
						2017	12	24	358	14.6	7.2	10.9	63	11.0541	6.54405	4.81128	0.809861	1.12643
						2017	12	25	359	12.9	5.9	9.4	73.5	28.2236	15.8052	11.9476	1.90598	2.13716
						2017	12	26	360	14	5.5	9.75	93	25.4141	17.2816	11.8551	1.91555	2.36568
						2017	12	27	361	13.3	8.4	10.85	88.5	29.8679	11.7082	10.5785	1.77752	1.79537
						2017	12	28	362	12.4	8.5	10.45	61.5	31.7522	9.90668	10.0329	1.66231	1.52704
						2017	12	29	363	11.5	9.4	10.45	53	33.7254	5.66587	7.81964	1.29561	0.987235
						2017	12	30	364	13.2	10.3	11.75	75	39.0225	9.05322	10.6325	1.84272	1.51735
						2017	12	31	365	10.1	7.8	8.95	73.5	20.2886	3.73311	4.92307	0.772375	0.674581
																	1475.93	1980.04
																	ETo-HS	ETo-TURC (Ousman Couly (2016)

[truncated: 2 more sheets: Monthly average, Calc. Rs. ]
