# Supplementary material for: Assessing of evapotranspiration models using limited climatic data in Southeast Anatolian Project Region of Turkey
Source: PeerJ. 2021 Jun 9;9:e11571. doi: 10.7717/peerj.11571 (PMC8197036; doi:10.7717/peerj.11571)
Supplement: Supplemental Information 8 [file peerj-09-11571-s008.xlsx]

## Sheet: 2008
	BATMAN PROVİNCE					year	month	day	DOY	Tmax	Tmin	Tmean	RHmean.	Ra	Rs=0.16(Tmax-Tmin)^0.5*Ra	Rs=from meteorological station	ETo-HS	ETo-TURC (Ousman Couly (2016)
	DOY	246					#	#		°C	°C	°C	%	MJ m-2 day-1*(0.408 mm day-1)
	φ (-)	36.71	0.64071			2008	1	1	1	3.4	-10.4	-3.5	63.5	12.0882	13.3453	7.18489	0.602593	-1.45629
	tan(φ)		0.745649			2008	1	2	2	7.6	-4.2	1.7	76	10.9242	10.3125	6.00416	0.686681	0.391384
	sin(φ)		0.597765			2008	1	3	3	7.8	-7.4	0.2	71	8.57812	10.431	5.35099	0.564904	0.0510725
	cos(φ)		0.801671			2008	1	4	4	7.4	-0.8	3.3	57.5	9.86961	6.47446	4.52196	0.559599	0.478767
	dr	0.984766		(1+0.033*cos(2*3.14/365*DOY))		2008	1	5	5	6.4	-0.6	2.9	83.5	19.2872	10.8008	8.16465	0.991233	0.647421
	δ	0.120494		(0.409*sin(2*3.14/365*DOY-1.39))		2008	1	6	6	6.8	-4.4	1.2	93.5	15.1071	13.536	8.08928	0.901429	0.358818
	tan(δ)	0.121081				2008	1	7	7	5.4	-8.6	-1.6	85.5	7.70028	8.62431	4.60989	0.437999	-0.396589
	sin(δ)	0.120203				2008	1	8	8	0.2	-9.6	-4.7	65	15.3477	12.0326	7.68733	0.590629	-1.99773
	cos(δ)	0.992749				2008	1	9	9	-2.2	-6.4	-4.3	79	24.8996	8.36628	8.16465	0.646457	-1.30264
	X	0.991849				2008	1	10	10	-1	-9.2	-5.1	62	18.8071	12.3374	8.61685	0.64183	-2.30402		-
	ωs (eq. 25)	1.49314		(acos{(-1*tan(-0.35)*tan(0.409*sin(2*3.14/365*DOY-1.39))))		2008	1	11	11	4.4	-10.6	-3.1	64	15.2838	18.3405	9.47099	0.816546	-1.64989
	sin ωs	0.996986				2008	1	12	12	5.2	-11.4	-3.1	88	12.7654	16.9525	8.32166	0.717456	-1.5378
	sin φ*sin δ	-0.0718532		(sin(0.35)*sin(0.409*sin(2*3.14/365*DOY-1.39)))		2008	1	13	13	4.8	-10.2	-2.7	78.5	14.7973	17.7567	9.16953	0.812067	-1.35054
	cos φ*cos δ	0.795859		(cos(0.35)*cos(0.409*sin(2*3.14/365*DOY-1.39))		2008	1	14	14	5.6	-12.2	-3.3	74	11.6857	16.6404	7.88831	0.670841	-1.63771
	Gsc	0.082				2008	1	15	15	6.2	-13	-3.4	72.5	8.99409	13.8149	6.30562	0.532548	-1.44515
						2008	1	16	16	5	-11.4	-3.2	68.5	13.1435	17.2443	8.51636	0.729247	-1.62539
	Ra	25.4105				2008	1	17	17	7	-10.2	-1.6	54.5	12.9478	17.8162	8.59172	0.816325	-0.736826
						2008	1	18	18	8	-10.4	-1.2	61	10.7981	15.8948	7.41099	0.721527	-0.484808
						2008	1	19	19	8.2	-10.2	-1	69	13.0675	19.2354	8.96855	0.88369	-0.472205
						2008	1	20	20	8.2	-10	-0.9	82	13.8016	20.0951	9.42075	0.933771	-0.438983
						2008	1	21	21	8	-10.8	-1.4	91.5	13.0726	19.6612	9.06904	0.872315	-0.69412
						2008	1	22	22	9.2	-10	-0.4	85.5	11.2157	17.2274	7.86319	0.802446	-0.164065
						2008	1	23	23	6.8	-5	0.9	84.5	18.3975	17.3673	10.1116	1.109	0.34142
						2008	1	24	24	10.4	-9	0.7	88.5	12.245	19.0043	8.62941	0.936312	0.291558
						2008	1	25	25	11.6	-8.6	1.5	85	12.7425	20.5918	9.16325	1.03723	0.639216
						2008	1	26	26	8.4	-7.4	0.5	85	16.0373	20.2712	10.1995	1.09471	0.223612
						2008	1	27	27	8.6	-8	0.3	82	3.23713	4.2989	2.11025	0.224017	0.0388345
						2008	1	28	28	7	1.4	4.2	86.5	4.84354	2.16991	1.83391	0.236629	0.288875
						2008	1	29	29	9.4	4.4	6.9	62	24.2955	9.71819	8.69221	1.2592	1.15332
						2008	1	30	30	7.4	1.8	4.6	72	26.2082	11.7413	9.92319	1.30367	1.0063
						2008	1	31	31	7.4	0.4	3.9	80.5	26.7647	14.9882	11.33	1.44198	1.09246
						2008	2	1	32	6.4	-6.2	0.1	86	18.0693	18.2138	10.2623	1.07738	0.0416834
						2008	2	2	33	6	-8	-1	71	18.2331	20.421	10.9155	1.07553	-0.498459
						2008	2	3	34	9.4	-8	0.7	90.5	15.0375	20.9322	10.0362	1.08896	0.318205
						2008	2	4	35	9.2	-8.4	0.4	89.5	18.0395	25.3996	12.1088	1.29253	0.221345
						2008	2	5	36	9.4	-8	0.7	83	16.7502	23.3163	11.1793	1.21298	0.351157
						2008	2	6	37	11.4	-7.4	2	86.5	14.7746	22.221	10.2498	1.19028	0.886636
						2008	2	7	38	13	-6.2	3.4	84.5	6.32453	9.71448	4.43403	0.551319	0.676191
						2008	2	8	39	8.4	-0.6	3.9	89	22.6621	16.3167	10.8778	1.38443	1.17745
						2008	2	9	40	10.6	2.4	6.5	79	25.7158	16.8696	11.7822	1.6792	1.77691
						2008	2	10	41	11.6	-2	4.8	73.5	13.3689	14.5453	7.88831	1.04559	1.25017
						2008	2	11	42	9.7	-2	3.85	84	14.9873	14.0281	8.20233	1.04151	1.02053
						2008	2	12	43	8.2	4.4	6.3	60.5	24.5664	7.4682	7.66221	1.08303	0.876393
						2008	2	13	44	10.6	2.8	6.7	69	24.596	15.3479	10.9909	1.57931	1.66906
						2008	2	14	45	8.6	2	5.3	74.5	35.784	18.894	14.7089	1.99279	1.69836
						2008	2	15	46	7.6	-2.6	2.5	80	18.9276	15.4449	9.67197	1.15154	0.776545
						2008	2	16	47	8.2	-6	1.1	84	7.04169	7.99936	4.24562	0.47062	0.213694
						2008	2	17	48	10	3	6.5	81.5	11.2756	6.31432	4.77318	0.680271	0.787661
						2008	2	18	49	14.6	6.6	10.6	90.5	29.6991	19.0074	13.4403	2.23869	2.70805
						2008	2	19	50	10	-2.2	3.9	72	28.2752	27.5965	15.8017	2.0111	1.899
						2008	2	20	51	4.2	-7	-1.4	87.5	29.0882	26.063	15.5756	1.49816	-0.898413
						2008	2	21	52	7.6	-7.8	-0.1	73.5	26.2469	32.3362	16.48	1.7108	-0.0716249
						2008	2	22	53	10.7	-8	1.35	77	22.5115	33.6773	15.5756	1.74937	0.915511
						2008	2	23	54	12.4	-6.2	3.1	78.5	9.6477	14.3558	6.65733	0.816046	0.873171
						2008	2	24	55	10.2	-4.8	2.7	74.5	10.5405	12.6486	6.53172	0.785325	0.696962
						2008	2	25	56	11.8	2	6.9	67	16.6266	13.0353	8.32794	1.20643	1.47731
						2008	2	26	57	10.4	4.6	7.5	67.5	41.8232	19.4059	16.1158	2.39133	2.22125
						2008	2	27	58	14.4	-0.2	7.1	70	26.7304	31.2211	16.3419	2.38654	3.31754
						2008	2	28	59	16	-0.4	7.8	79.5	21.9253	28.766	14.2065	2.13302	3.27235
						2008	3	1	60	16.6	3	9.8	66.5	26.8442	29.2064	15.8394	2.56399	3.83382
						2008	3	2	61	16.8	4.6	10.7	61	27.3986	26.741	15.3119	2.55942	3.72111
						2008	3	3	62	17.6	2.8	10.2	70.5	16.1621	19.136	9.94831	1.63371	2.66335
						2008	3	4	63	12.4	5.8	9.1	71.5	45.5933	24.0733	18.741	2.95674	3.06251
						2008	3	5	64	14.8	0.6	7.7	61	30.2293	34.3404	18.226	2.72584	3.83081
						2008	3	6	65	18.4	-3.2	7.6	35	23.5416	40.6799	17.5058	2.60786	5.4141
						2008	3	7	66	19.6	1	10.3	42.5	25.1932	37.4875	17.3844	2.86507	5.53007
						2008	3	8	67	21.4	1.8	11.6	58	22.7334	35.646	16.1032	2.77669	5.10145
						2008	3	9	68	21.4	2	11.7	57.5	21.7808	33.8039	15.3495	2.65574	4.87592
						2008	3	10	69	22.2	5	13.6	52	10.3355	14.2217	6.85831	1.26303	2.40455
						2008	3	11	70	24	8.8	16.4	70.5	29.6811	36.0922	18.5149	3.71378	6.18211
						2008	3	12	71	21.2	12	16.6	65	35.2005	25.9076	17.083	3.44659	4.55935
						2008	3	13	72	21	5	13	67.5	14.8769	19.0425	9.52124	1.71994	3.04157
						2008	3	14	73	16.2	4.8	10.5	63.5	18.9268	17.2612	10.2247	1.69708	2.47012
						2008	3	15	74	15.6	2.8	9.2	55.5	36.1623	37.0302	20.7005	3.27803	4.61037
						2008	3	16	75	13.2	3.4	8.3	43	40.8268	32.0082	20.4493	3.13031	4.14198
						2008	3	17	76	15.4	-1.2	7.1	55	31.0995	41.3002	20.2735	2.9607	4.32135
						2008	3	18	77	18.4	1.2	9.8	50.5	24.3245	33.4705	16.1409	2.61279	4.35616
						2008	3	19	78	20	1.8	10.9	61.5	28.1553	40.9941	19.2183	3.23494	5.62089
						2008	3	20	79	23.2	7.8	15.5	62.5	26.4069	32.5333	16.5805	3.23825	5.45459
						2008	3	21	80	21.8	4.6	13.2	61	15.9387	21.9316	10.5764	1.92294	3.48569
						2008	3	22	81	17.8	8.4	13.1	55.5	30.471	22.9142	14.9476	2.70893	3.6136
						2008	3	23	82	26	9.8	17.9	57.5	26.0197	33.7216	16.7564	3.50846	6.04007
						2008	3	24	83	26.4	9.6	18	56.5	29.1517	39.1799	19.1178	4.01412	6.97837
						2008	3	25	84	30.6	6.8	18.7	61.5	24.4923	46.6334	19.1178	4.0926	8.3813
						2008	3	26	85	29	13	21	55	33.5418	42.9335	21.4667	4.88502	8.14175
						2008	3	27	86	24.4	9.8	17.1	51	34.353	40.1242	21.002	4.29887	6.97127
						2008	3	28	87	24.6	3.6	14.1	81	20.0096	33.6161	14.6712	2.7449	5.36327
						2008	3	29	88	22	4.6	13.3	58.5	26.5368	36.9392	17.711	3.23051	5.68613
						2008	3	30	89	24.8	4.6	14.7	56	9.86909	15.9484	7.09696	1.35277	2.76772
						2008	3	31	90	29	12	20.5	61.5	31.4931	42.8306	20.7759	4.66688	8.04142
						2008	4	1	91	23.4	11.8	17.6	65	29.9192	27.765	16.3042	3.38509	4.99659
						2008	4	2	92	16.4	5.8	11.1	67	42.8247	36.3153	22.3083	3.78123	5.06332
						2008	4	3	93	17.4	2.8	10.1	52	35.4111	41.3601	21.6489	3.54248	5.42001
						2008	4	4	94	19.6	0.8	10.2	53	29.5492	44.442	20.4996	3.36644	5.83865
						2008	4	5	95	19.4	8.1	13.75	58	34.4241	31.1194	18.5149	3.42601	4.92365
						2008	4	6	96	19.2	2.2	10.7	57	23.0391	31.3331	15.1988	2.54052	4.3138
						2008	4	7	97	24	7.2	15.6	57	23.5206	31.6117	15.4249	3.0216	5.32618
						2008	4	8	98	19.2	11.8	15.5	59.5	47.5027	28.1216	20.6754	4.038	4.75956
						2008	4	9	99	21.3	4.2	12.75	75.5	35.4446	48.4883	23.4514	4.20192	7.20398
						2008	4	10	100	19	8	13.5	74	29.8249	26.2459	15.8269	2.90541	4.1609
						2008	4	11	101	19.8	5.4	12.6	54.5	31.653	36.4642	19.2183	3.42655	5.45626
						2008	4	12	102	22	10.4	16.2	59.5	29.5734	27.4442	16.1158	3.21364	4.75386
						2008	4	13	103	23.6	7.8	15.7	59	32.2721	40.792	20.5247	4.03264	6.79826
						2008	4	14	104	27.8	6.8	17.3	43	26.5195	44.5528	19.4444	4.00286	8.51888
						2008	4	15	105	31.4	10.8	21.1	61.5	25.9455	42.7582	18.8415	4.29866	8.12609
						2008	4	16	106	31.8	10.4	21.1	55.5	21.4848	36.782	15.9022	3.62807	7.04325
						2008	4	17	107	31.5	17.8	24.65	79	42.0597	46.0975	24.9085	6.20144	9.28688
						2008	4	18	108	23.2	7.8	15.5	71	31.9884	39.4097	20.085	3.9227	6.5379
						2008	4	19	109	22.6	5.6	14.1	85	34.5967	47.0515	22.8233	4.2701	7.38136
						2008	4	20	110	25.4	6.8	16.1	78.5	35.387	52.6559	24.4186	4.85499	8.78575
						2008	4	21	111	25.8	5	15.4	70	31.9657	53.191	23.3258	4.54195	8.68129
						2008	4	22	112	29	8	18.5	70	30.5283	51.2875	22.3837	4.76548	9.13791
						2008	4	23	113	32	11.2	21.6	62.5	30.9157	51.4437	22.5596	5.21308	9.79403
						2008	4	24	114	35.2	13.8	24.5	32.5	28.6124	48.9845	21.1778	5.254	12.2757
						2008	4	25	115	34.6	14	24.3	32.5	29.7854	49.0864	21.63	5.34081	12.2618
						2008	4	26	116	35.8	17.1	26.45	42.5	24.4359	36.5561	16.9071	4.38784	8.46394
						2008	4	27	117	35.6	18.2	26.9	53	23.5538	32.7869	15.7201	4.12127	6.94124
						2008	4	28	118	32.6	19.2	25.9	56.5	40.7908	43.7278	23.891	6.12328	8.99439
						2008	4	29	119	31.4	11.8	21.6	48.5	33.1957	52.0509	23.5142	5.43368	10.1174
						2008	4	30	120	23.2	10.4	16.8	50	43.2061	44.243	24.7326	5.01896	7.58813
						2008	5	1	121	24.8	8.4	16.6	50	38.4613	50.4612	24.921	5.02797	8.55787
						2008	5	2	122	25.8	6	15.9	49.5	34.3685	54.4397	24.4688	4.83628	9.08172
						2008	5	3	123	26.2	8	17.1	46	33.5655	48.8714	22.9113	4.68967	8.89668
						2008	5	4	124	24	13.6	18.8	49.5	48.7849	40.589	25.1722	5.40345	7.41154
						2008	5	5	125	25.6	11	18.3	49.5	41.7084	48.7154	25.4988	5.39878	8.71706
						2008	5	6	126	29.2	8.2	18.7	53	30.2199	50.7694	22.1576	4.74333	9.09277
						2008	5	7	127	23	11.8	17.4	50.5	43.1162	38.6321	23.0871	4.76629	6.77948
						2008	5	8	128	21.2	3.6	12.4	48	30.6896	43.211	20.6	3.64874	6.53695
						2008	5	9	129	19.4	4.8	12.1	56	34.2708	40.0283	20.9517	3.67417	5.82973
						2008	5	10	130	18.4	10.4	14.4	66	41.0236	26.2551	18.5652	3.50609	4.30383
						2008	5	11	131	19.2	6.1	12.65	66.5	42.0795	44.0993	24.3683	4.35192	6.55086
						2008	5	12	132	23.8	10	16.9	85	33.2636	36.723	19.771	4.02371	6.37434
						2008	5	13	133	23.2	7.4	15.3	64.5	38.3553	48.481	24.3935	4.73554	7.91612
						2008	5	14	134	24.6	9.6	17.1	58	40.3783	48.4539	25.0215	5.12162	8.34684
						2008	5	15	135	25.9	6.8	16.35	54	16.5263	25.2522	11.5561	2.31457	4.42054
						2008	5	16	136	25.6	6.6	16.1	57.5	35.733	54.3141	24.921	4.95489	9.05186
						2008	5	17	137	25.8	10	17.9	62	33.3387	42.1401	21.203	4.43949	7.45996
						2008	5	18	138	28	10.4	19.2	57	25.3002	35.6227	16.9825	3.68528	6.56334
						2008	5	19	139	25.2	14	19.6	59.5	49.0277	43.9288	26.2525	5.75851	8.08122
						2008	5	20	140	27.7	9.8	18.75	53	35.1445	50.327	23.7905	5.09988	9.02737
						2008	5	21	141	29.6	10.6	20.1	50	36.5615	55.5734	25.4988	5.66797	10.2365
						2008	5	22	142	32.4	11.4	21.9	53	34.3572	57.72	25.1911	5.8655	11.0041
						2008	5	23	143	33.6	11.2	22.4	30	33.7057	60.4007	25.524	6.01786	14.9176
						2008	5	24	144	35.4	12.8	24.1	49	33.0278	59.7143	25.122	6.17357	11.9779
						2008	5	25	145	36.5	14.8	25.65	38.5	34.144	59.2739	25.4486	6.48517	13.9753
						2008	5	26	146	33	16	24.5	41	25.7048	34.9585	16.9573	4.20694	8.03952
						2008	5	27	147	30.3	14.6	22.45	43.5	41.5681	52.2095	26.353	6.22105	11.0277
						2008	5	28	148	29.6	13.6	21.6	49.5	42.7074	54.6655	27.3327	6.31608	10.4576
						2008	5	29	149	31	12.8	21.9	48.5	38.4605	55.9985	26.2525	6.11264	10.9163
						2008	5	30	150	32.5	12	22.25	49	38.5969	63.2989	27.9608	6.5678	12.2809
						2008	5	31	151	29.8	15.6	22.7	39	45.8335	52.0668	27.6342	6.56402	11.6973
						2008	6	1	152	31	9.8	20.4	52.5	35.4309	60.0908	26.1018	5.84792	11.1082
						2008	6	2	153	34.4	9.6	22	52.5	32.7112	64.899	26.0641	6.08406	12.3477
						2008	6	3	154	36.2	15.6	25.9	44	36.2545	59.7474	26.3279	6.74784	13.1797
						2008	6	4	155	32.5	15.2	23.85	48	42.5248	58.8543	28.2999	6.91303	11.9296
						2008	6	5	156	31.8	15.5	23.65	41	38.5305	50.2438	24.8896	6.05077	11.2035
						2008	6	6	157	33.4	9.8	21.6	38.5	34.1789	64.5298	26.5665	6.13902	14.1905
						2008	6	7	158	35.4	14	24.7	40	34.1449	58.456	25.2727	6.29954	13.3458
						2008	6	8	159	33.6	16.6	25.1	58	40.9753	55.7264	27.0313	6.8013	11.2187
						2008	6	9	160	32	18	25	55	41.7116	46.717	24.9713	6.26834	9.45635
						2008	6	10	161	34	17.7	25.85	49	40.2125	52.4371	25.9761	6.65008	10.8493
						2008	6	11	162	34.2	15.8	25	51.5	31.7354	46.7146	21.7808	5.46745	9.45588
						2008	6	12	163	31.6	16.6	24.1	51	43.6722	52.4066	27.0627	6.65048	10.4129
						2008	6	13	164	27.4	16.8	22.1	49.5	52.4217	44.4536	27.3076	6.39035	8.65627
						2008	6	14	165	31.4	12	21.7	57	39.4443	61.2176	27.7975	6.43978	11.6041
						2008	6	15	166	34	13.8	23.9	49	36.4196	58.854	26.1897	6.40522	11.7734
						2008	6	16	167	35.2	14.8	25	36	36.2753	59.2014	26.2148	6.58049	14.2502
						2008	6	17	168	35	16	25.5	42.5	39.4251	59.9262	27.496	6.98274	13.4016
						2008	6	18	169	35.6	14.6	25.1	36	37.655	63.2603	27.6091	6.94668	15.2167
						2008	6	19	170	36.6	18.6	27.6	35	41.0791	59.1539	27.8854	7.42508	14.9364
						2008	6	20	171	37.4	23.2	30.3	33	46.3022	52.5993	27.9168	7.87552	14.0939
						2008	6	21	172	38	16.8	27.4	24.5	35.4309	60.0908	26.1018	6.91952	16.9945
						2008	6	22	173	37.2	20	28.6	25.5	41.4652	57.056	27.5149	7.48779	16.2368
						2008	6	23	174	35.4	22.2	28.8	30	47.3002	49.949	27.496	7.51491	13.6381
						2008	6	24	175	35.4	18.3	26.85	25.5	41.3299	56.5393	27.3453	7.16097	15.742
						2008	6	25	176	36	20.4	28.2	26.5	42.1781	52.6383	26.6544	7.1911	14.7929
						2008	6	26	177	38	18.8	28.4	25.5	38.4668	59.085	26.9685	7.30746	16.7532
						2008	6	27	178	40	19.2	29.6	30	36.7339	61.1252	26.8052	7.45187	16.7219
						2008	6	28	179	40.4	20.4	30.4	24.5	35.504	56.8065	25.4046	7.18171	16.6792
						2008	6	29	180	39.7	18.6	29.15	28.5	37.2067	62.805	27.3453	7.52985	17.3621
						2008	6	30	181	39.6	18.5	29.05	39.5	37.0273	62.502	27.2134	7.47757	15.1858
						2008	7	1	182	38.4	19.4	28.9	39	39.191	59.5703	27.3327	7.48631	14.5609
						2008	7	2	183	37.2	22.2	29.7	37.5	45.4256	54.5107	28.1492	7.84202	13.74
						2008	7	3	184	37.4	16	26.7	36	37.1317	63.5694	27.4835	7.17298	15.6392
						2008	7	4	185	38	16	27	34	38.145	67.1351	28.6265	7.52168	16.9489
						2008	7	5	186	35.6	19	27.3	41	41.9285	55.681	27.3327	7.22982	13.0444
						2008	7	6	187	37	14.8	25.9	39	35.5234	63.0896	26.7801	6.86374	14.806
						2008	7	7	188	37.9	16.6	27.25	44	38.0693	64.87	28.1115	7.42758	14.5356
						2008	7	8	189	37.2	18.8	28	22.5	42.0028	61.8281	28.8275	7.74356	17.9714
						2008	7	9	190	35.2	20	27.6	18	42.8302	52.0815	26.7172	7.11403	15.8538
						2008	7	10	191	36	19.8	27.9	27.5	41.4092	53.6663	26.667	7.14757	14.8541
						2008	7	11	192	38.7	18.6	28.65	34	36.9828	59.4684	26.5288	7.22723	15.3883
						2008	7	12	193	40.2	16.2	28.2	30.5	33.4763	64.2744	26.2399	7.07927	17.1707
						2008	7	13	194	41.2	18.6	29.9	32	34.3489	62.1029	26.1269	7.30927	16.6594
						2008	7	14	195	41.8	22	31.9	48.5	35.9564	56.9549	25.5993	7.46196	12.7166
						2008	7	15	196	40.2	22	31.1	37.5	39.2518	57.1506	26.7926	7.68408	14.6015
						2008	7	16	197	38	22.8	30.4	17.5	42.3469	51.4938	26.4158	7.46756	16.2869
						2008	7	17	198	39	21.8	30.4	32	37.5373	51.6513	24.9085	7.04145	14.024
						2008	7	18	199	41.2	19	30.1	34.5	33.424	59.3611	25.1974	7.07878	15.5292
						2008	7	19	200	38.8	22	30.4	26.5	39.7628	53.4412	26.0766	7.37168	15.3968
						2008	7	20	201	41.5	19.6	30.55	27	34.0212	59.6052	25.4737	7.22365	17.042
						2008	7	21	202	42	18.4	30.2	26.5	30.8984	58.3362	24.0166	6.76116	16.7174
						2008	7	22	203	42.6	20.8	31.7	36.5	33.931	59.1757	25.3481	7.359	15.3784
						2008	7	23	204	40.2	23.8	32	27.5	36.7747	48.2485	23.8282	6.95967	14.0397
						2008	7	24	205	40.6	21.6	31.1	25.5	29.4113	44.7051	20.5121	5.88284	13.2116
						2008	7	25	206	41.6	22.6	32.1	29	34.4722	52.3978	24.0418	7.03614	14.9654
						2008	7	26	207	42	24.8	33.4	24.5	36.818	50.6615	24.4311	7.33638	15.3958
						2008	7	27	208	40.4	21	30.7	29	35.1488	54.5509	24.7703	7.04597	15.3341
						2008	7	28	209	39	21.6	30.3	20.5	36.2293	50.4312	24.1799	6.82131	15.4798
						2008	7	29	210	39	18.4	28.7	19	33.4178	55.0725	24.2679	6.61839	16.7918
						2008	7	30	211	40.4	19.6	30	29	31.3288	52.1311	22.861	6.40902	14.5674
						2008	7	31	212	41.8	18.2	30	19.5	31.8842	60.1973	24.7829	6.9478	18.4815
						2008	8	1	213	41.4	20.8	31.1	28.5	32.3973	53.3907	23.5268	6.74744	15.1665
						2008	8	2	214	43	21	32	44.5	31.065	54.6743	23.3132	6.80925	12.9223
						2008	8	3	215	42.6	22.4	32.5	38	32.5593	52.6158	23.4137	6.90727	13.5925
						2008	8	4	216	41.5	21	31.25	38.5	31.1064	51.0145	22.5344	6.48267	12.9506
						2008	8	5	217	42.6	21.7	32.15	39.5	30.9533	51.7538	22.6412	6.63289	13.0887
						2008	8	6	218	41.8	14.8	28.3	45.5	27.0745	58.4809	22.5093	6.08599	13.0612
						2008	8	7	219	40.2	23.4	31.8	52	33.4804	44.9977	21.9566	6.38727	9.9186
						2008	8	8	220	40	21.7	30.85	49.5	27.4543	40.1931	18.7913	5.36175	8.8825
						2008	8	9	221	39.6	25.6	32.6	45.5	30.8011	34.4972	18.4395	5.45066	8.26723
						2008	8	10	222	39.2	20.4	29.8	40	32.5548	48.9624	22.5847	6.30505	12.0312
						2008	8	11	223	39.2	22.7	30.95	42	33.9767	44.8492	22.0822	6.31373	10.9212
						2008	8	12	224	38.6	21.6	30.1	46	36.1104	49.1102	23.8219	6.69238	11.1984
						2008	8	13	225	39.8	19.6	29.7	56.5	33.3162	53.8389	23.958	6.6744	11.5199
						2008	8	14	226	39.7	20.8	30.25	49	33.0103	49.9116	22.9615	6.47086	10.9306
						2008	8	15	227	39.2	22.4	30.8	54	32.6951	43.9423	21.4416	6.1117	9.59642
						2008	8	16	228	39.4	20.6	30	54	28.8974	43.4616	20.0474	5.62022	9.414
						2008	8	17	229	38	26.2	32.1	48.5	39.9946	37.7549	21.9817	6.43326	8.59858
						2008	8	18	230	38.3	20.6	29.45	53.5	33.7937	47.8519	22.748	6.30395	10.2575
						2008	8	19	231	40	18.7	29.35	56.5	28.5605	48.667	21.0899	5.8321	10.4129
						2008	8	20	232	40.8	19.6	30.2	58	27.9287	47.367	20.5749	5.79225	10.2437
						2008	8	21	233	40.4	20.2	30.3	58.5	22.8998	37.006	16.4675	4.64558	8.1066
						2008	8	22	234	42.6	20.6	31.6	56	24.6879	43.4508	18.5275	5.36798	9.57334
						2008	8	23	235	40	23.8	31.9	49	23.5816	30.5617	15.1862	4.42665	6.98307
						2008	8	24	236	40.8	25	32.9	54	12.1267	15.3282	7.71245	2.29334	3.70873
						2008	8	25	237	35.2	24	29.6	56	30.3784	27.2191	16.2665	4.5221	6.03004
						2008	8	26	238	36	22.8	29.4	56.5	30.1433	31.8314	17.5226	4.85074	6.96305
						2008	8	27	239	39	20.6	29.8	56.5	28.1666	41.4612	19.3314	5.39682	8.98049
						2008	8	28	240	38.8	23.6	31.2	54.5	28.2715	34.3782	17.6356	5.06822	7.63464
						2008	8	29	241	40	19	29.5	55.5	22.8705	38.4225	16.7689	4.65195	8.32554
						2008	8	30	242	40.5	22	31.25	62	30.2259	44.7343	20.801	5.984	9.80779
						2008	8	31	243	41	22	31.5	60	29.9516	45.5264	20.8889	6.03992	9.99944
						2008	9	1	244	39.2	20.8	30	40	29.832	43.9128	20.4744	5.73995	10.8654
						2008	9	2	245	39	10	24.5	46	23.2086	53.8439	19.9971	4.96107	11.3694
						2008	9	3	246	40.5	19	29.75	42.5	27.022	46.4779	20.0474	5.59082	11.0818
						2008	9	4	247	39	20.5	29.75	57	30.4631	45.0855	20.9643	5.84654	9.72236
						2008	9	5	248	39.4	18.8	29.1	52	24.4493	40.2924	17.755	4.88383	8.66966
						2008	9	6	249	38.4	10.5	24.45	56.5	23.5576	52.5806	19.9092	4.93342	10.5038
						2008	9	7	250	38.6	17.6	28.1	53	24.7207	41.5308	18.1255	4.87945	8.81626
						2008	9	8	251	37.6	14	25.8	56	26.0503	49.183	20.2483	5.17778	10.051
						2008	9	9	252	37.2	15.6	26.4	56.5	22.5168	38.9091	16.7438	4.34055	8.10475
						2008	9	10	253	34.6	26.8	30.7	53.5	43.289	27.0123	19.3439	5.50243	6.06055
						2008	9	11	254	34.8	24.2	29.5	53.5	37.5922	31.8782	19.5826	5.4325	6.98065
						2008	9	12	255	32.8	17.5	25.15	55.5	30.467	37.2917	19.0676	4.80316	7.6473
						2008	9	13	256	33.6	13.4	23.5	54.5	22.4544	36.2862	16.1472	3.91124	7.26158
						2008	9	14	257	36	16.4	26.2	29.5	18.2293	28.5835	12.9127	3.33225	7.81771
						2008	9	15	258	34.2	24	29.1	34	35.4953	28.9642	18.1381	4.98922	7.80435
						2008	9	16	259	35.6	16.2	25.9	30	25.8803	40.1663	18.2386	4.67456	10.6653
						2008	9	17	260	35.6	14.8	25.2	36.5	24.3917	40.5878	17.7989	4.4888	9.89297
						2008	9	18	261	36	16.4	26.2	12.5	23.8594	37.4116	16.9008	4.36143	11.9589
						2008	9	19	262	34.6	16	25.3	49.5	26.0397	38.747	17.9685	4.54211	8.00428
						2008	9	20	263	33.4	16.3	24.85	40.5	25.7054	35.165	17.0076	4.25432	8.17925
						2008	9	21	264	33	14	23.5	50.5	24.4133	37.1083	17.0264	4.12422	7.41712
						2008	9	22	265	33.8	16.4	25.1	45	26.198	36.4677	17.4849	4.39935	8.01614
						2008	9	23	266	32.8	11.4	22.1	54	8.85866	15.166	6.55684	1.53439	3.18655
						2008	9	24	267	24	14.3	19.15	60.5	33.8276	26.2502	16.8569	3.65308	4.92655
						2008	9	25	268	25	12	18.5	46.5	32.0074	33.2877	18.4647	3.93112	6.35927
						2008	9	26	269	28	10.8	19.4	57	22.1097	30.4229	14.6712	3.20094	5.68409
						2008	9	27	270	29.7	10.8	20.25	53.5	15.8189	23.9182	11.0034	2.45556	4.63168
						2008	9	28	271	20.4	15.4	17.9	43.5	46.1684	18.4674	16.5177	3.45849	3.78922
						2008	9	29	272	23.6	11.4	17.5	30	30.298	29.5709	16.9322	3.50556	6.79491
						2008	9	30	273	25.4	10	17.7	42.5	19.9852	24.6218	12.5484	2.61268	4.96243
						2008	10	1	274	22.8	14	18.4	43.5	38.2147	26.9031	18.1381	3.85095	5.41117
						2008	10	2	275	24	10	17	52	28.7449	32.1943	17.2086	3.5123	5.64619
						2008	10	3	276	25.2	9.6	17.4	55.5	26.3564	32.8927	16.6559	3.43857	5.82398
						2008	10	4	277	27.6	9.2	18.4	50	23.9754	35.2919	16.4549	3.49359	6.38401
						2008	10	5	278	28	9.4	18.7	55.5	23.3365	34.7247	16.1032	3.44725	6.33279
						2008	10	6	279	29.4	10.5	19.95	56	23.8368	36.0412	16.5805	3.67099	6.74742
						2008	10	7	280	28.8	13	20.9	55	27.2555	34.451	17.3342	3.93443	6.59468
						2008	10	8	281	28	13	20.5	54.5	27.2026	32.6432	16.8569	3.78655	6.21773
						2008	10	9	282	26.7	10.6	18.65	47.5	22.696	29.2324	14.5708	3.11493	5.5738
						2008	10	10	283	26.4	8.3	17.35	47.5	22.5864	32.7051	15.3747	3.16956	5.99162
						2008	10	11	284	26.2	9.4	17.8	52	22.4192	30.1315	14.7027	3.06983	5.42067
						2008	10	12	285	26.4	8.8	17.6	54.5	20.126	28.3375	13.5094	2.80483	5.0924
						2008	10	13	286	28.2	8.8	18.5	54.5	21.1748	32.8633	14.9225	3.17699	5.9838
						2008	10	14	287	31	10.5	20.75	56	17.0617	27.9812	12.36	2.79455	5.41071
						2008	10	15	288	32.2	12.6	22.4	56	13.007	20.3949	9.21349	2.17229	4.17474
						2008	10	16	289	33.4	17.4	25.4	55.5	20.0583	25.6747	12.8373	3.25257	5.41136
						2008	10	17	290	25.7	13.6	19.65	27	26.2703	25.4296	14.621	3.21142	6.42759
						2008	10	18	291	25.4	8.7	17.05	40	22.323	29.8235	14.5959	2.98333	6.01484
						2008	10	19	292	25.8	10.5	18.15	52.5	22.0374	26.9738	13.792	2.90799	4.93296
						2008	10	20	293	26.2	8.8	17.5	59.5	21.4929	29.9182	14.3447	2.96984	5.3429
						2008	10	21	294	26.8	7.4	17.1	57.5	20.1945	31.3419	14.2316	2.91305	5.52095
						2008	10	22	295	27.8	7.4	17.6	50	9.12533	14.8925	6.59452	1.36916	2.84223
						2008	10	23	296	25	14.4	19.7	43.5	20.4599	17.35	10.658	2.3441	3.73902
						2008	10	24	297	27	13.2	20.1	47.5	19.4214	21.4412	11.5436	2.56594	4.32648
						2008	10	25	298	22.8	13.4	18.1	50.5	23.8135	17.9078	11.6817	2.45963	3.38995
						2008	10	26	299	22.4	12.4	17.4	44.5	18.669	14.9352	9.44587	1.95008	3.05709
						2008	10	27	300	22	11.4	16.7	42	20.2188	17.1455	10.5324	2.13115	3.50041
						2008	10	28	301	21.6	10.2	15.9	39.5	15.9273	14.5257	8.60428	1.70064	3.04801
						2008	10	29	302	20.2	9.2	14.7	39	16.593	14.6019	8.80526	1.67839	2.96357
						2008	10	30	303	17.2	8.8	13	57	27.3581	18.3846	12.6866	2.29173	2.94689
						2008	10	31	304	19.4	8.4	13.9	54.5	22.0846	19.4344	11.7194	2.17888	3.2093
						2008	11	1	305	21.2	9.4	15.3	39.5	24.2939	22.9334	13.3523	2.59211	4.50458
						2008	11	2	306	21.2	5.8	13.5	51	18.0047	22.1818	11.3049	2.07529	3.56412
						2008	11	3	307	20.8	5.8	13.3	54.5	17.9797	21.5756	11.1416	2.03225	3.44782
						2008	11	4	308	21	10	15.5	46	19.3151	16.9973	10.2498	2.00183	3.17887
						2008	11	5	309	19.6	4.4	12	64.5	16.9549	20.6171	10.5764	1.8485	3.12854
						2008	11	6	310	20.4	4	12.2	65	17.3696	22.7889	11.2547	1.98026	3.45927
						2008	11	7	311	20	2.4	11.2	69	17.1787	24.1876	11.531	1.96125	3.48229
						2008	11	8	312	21	5	13	68	13.8564	17.7361	8.86807	1.60195	2.85355
						2008	11	9	313	21.5	3.5	12.5	79.5	13.9521	20.091	9.47099	1.68309	3.12551
						2008	11	10	314	20.6	4.5	12.55	83.5	16.8263	21.6723	10.8025	1.92287	3.35562
						2008	11	11	315	20.8	2.8	11.8	77	15.0623	21.6898	10.2247	1.77504	3.24576
						2008	11	12	316	17	3	10	55	15.1907	17.0136	9.09416	1.48278	2.36885
						2008	11	13	317	18	0.8	9.4	62	9.06725	12.4765	6.01672	0.959835	1.73963
						2008	11	14	318	16.5	-0.2	8.15	62	12.8713	17.196	8.41587	1.28087	2.1048
						2008	11	15	319	19	2.4	10.7	67	15.3956	20.4454	10.0362	1.67758	2.90855
						2008	11	16	320	18.8	0.4	9.6	69.5	13.3329	19.626	9.15069	1.47052	2.62711
						2008	11	17	321	17.8	-0.2	8.8	75	14.3314	20.6373	9.72849	1.51773	2.60504
						2008	11	18	322	17.4	-0.6	8.4	62.5	12.8789	18.5455	8.74246	1.34339	2.29637
						2008	11	19	323	17.9	-0.4	8.75	60	7.04709	10.3169	4.82342	0.751083	1.417
						2008	11	20	324	15.6	3.7	9.65	54.5	11.5041	10.9519	6.34959	1.02225	1.58275
						2008	11	21	325	15.4	9.8	12.6	59.5	15.1941	6.80697	5.75294	1.02573	1.25911
						2008	11	22	326	13.8	6.8	10.3	52	16.9134	9.47149	7.15977	1.17998	1.45912
						2008	11	23	327	14.7	7.6	11.15	53	9.48704	5.38864	4.04464	0.686747	0.988525
						2008	11	24	328	17.8	10.5	14.15	61.5	17.521	10.2323	7.57428	1.41932	1.85426
						2008	11	25	329	18.3	7.6	12.95	66	12.576	10.7651	6.58196	1.18705	1.84639
						2008	11	26	330	17.8	4.6	11.2	59.5	14.888	15.7217	8.65453	1.47201	2.36039
						2008	11	27	331	17.3	2.6	9.95	61.5	16.647	19.5769	10.2121	1.66206	2.67862
						2008	11	28	332	16.8	1.2	9	57.5	2.00754	2.5054	1.26866	0.199411	0.534216
						2008	11	29	333	17	5.8	11.4	38	9.99321	8.95391	5.35099	0.916399	1.73181
						2008	11	30	334	10.6	4.6	7.6	46.5	19.4223	9.32272	7.61197	1.13396	1.24924
						2008	12	1	335	12.1	1.2	6.65	37.5	19.7127	17.1895	10.4131	1.49323	2.1636
						2008	12	2	336	9.6	1.4	5.5	46.5	18.012	11.8159	8.25258	1.12775	1.21439
						2008	12	3	337	7.4	2.2	4.8	37.5	22.5843	9.39506	8.24002	1.09221	1.01725
						2008	12	4	338	5.8	1.8	3.8	50.5	24.7295	7.91343	7.91343	1.0025	0.626811
						2008	12	5	339	6	0.2	3.1	54.5	20.7975	9.65004	8.01392	0.982334	0.623325
						2008	12	6	340	4.3	-0.2	2.05	78.5	20.6506	7.43421	7.00904	0.815994	0.354993
						2008	12	7	341	3.4	-0.5	1.45	52	21.1487	6.59839	6.68245	0.754457	0.237412
						2008	12	8	342	3.4	0.6	2	48	26.4609	5.92724	7.0844	0.822691	0.300747
						2008	12	9	343	7.8	0.8	4.3	56.5	1.33527	0.747749	0.565245	0.0732651	0.195996
						2008	12	10	344	11.4	0.6	6	78	14.5721	12.5903	7.66221	1.06954	1.30025
						2008	12	11	345	10	1.5	5.75	49.5	17.5567	11.9385	8.18977	1.13118	1.21371
						2008	12	12	346	8	-2.3	2.85	58	16.1447	13.3032	8.29026	1.00405	0.7619
						2008	12	13	347	6.6	-5	0.8	59	13.5996	12.6205	7.41099	0.808457	0.230898
						2008	12	14	348	7.2	-6.6	0.3	51.5	13.2082	14.5819	7.85062	0.833395	0.101339
						2008	12	15	349	6.2	-6.2	0	68.5	11.9051	11.8099	6.70757	0.700251	0
						2008	12	16	350	6.4	-6.4	0	55.5	12.0249	12.3135	6.88343	0.718609	0
						2008	12	17	351	8.6	-7	0.8	44.5	11.4092	14.2386	7.21001	0.786533	0.276435
						2008	12	18	352	8.3	-7.2	0.55	48.5	12.5626	15.5776	7.91343	0.851665	0.19787
						2008	12	19	353	9.2	-6.9	1.15	32	9.82189	12.6506	6.30562	0.700818	0.40906
						2008	12	20	354	7.6	-5.4	1.1	40.5	13.1513	13.6774	7.58684	0.84099	0.379277
						2008	12	21	355	10.6	-6.8	1.9	36.5	5.345	7.44024	3.56732	0.41217	0.396206
						2008	12	22	356	10	1.6	5.8	34.5	3.90056	2.62118	1.80878	0.250361	0.497421
						2008	12	23	357	8.2	3.7	5.95	42.5	13.471	4.84955	4.5722	0.636879	0.676441
						2008	12	24	358	12.8	6.4	9.6	44	6.95124	3.55903	2.81366	0.452159	0.741972
						2008	12	25	359	9.8	5	7.4	46	17.7015	6.79738	6.20513	0.917106	0.962173
						2008	12	26	360	9.8	2.6	6.2	48.5	14.8628	8.56099	6.38099	0.898188	0.986315
						2008	12	27	361	7.4	-1.5	2.95	45	14.5787	10.38	6.95879	0.846877	0.680691
						2008	12	28	362	6.4	-3.4	1.5	47.5	13.7427	10.7743	6.88343	0.779166	0.375486
						2008	12	29	363	6	-5.6	0.2	74	5.34765	4.96262	2.91415	0.307647	0.0287673
						2008	12	30	364	3.2	-3.6	-0.2	56.5	18.1839	9.89203	7.58684	0.783144	-0.050195
						2008	12	31	365	1.5	-1	0.25	62.5	13.5053	2.70105	3.41659	0.361692	0.024348
																	1272.33	2324.98
																	ETo-HS	ETo-TURC (Ousman Couly (2016)

## Sheet: 2009
	BATMAN					year	month	day	DOY	Tmax	Tmin	Tmean	RHmean.	Ra	Rs=0.16(Tmax-Tmin)^0.5*Ra	Rs=from meteorological station	ETo-HS	ETo-TURC (Ousman Couly (2016)
	DOY	246					#	#		°C	°C	°C	%	MJ m-2 day-1*(0.408 mm day-1)
	φ (-)	36.71	0.64071			2009	1	1	1	-0.4	-13.2	-6.8	53.5	12.5515	12.8527	7.18489	0.463533	-3.84137
	tan(φ)		0.745649			2009	1	2	2	-5.6	-17.2	-11.4	64.5	11.018	10.2247	6.00416	0.225372	-12.0889
	sin(φ)		0.597765			2009	1	3	3	-6	-16.8	-11.4	83.5	10.1766	8.79257	5.35099	0.200855	-10.6831
	cos(φ)		0.801671			2009	1	4	4	-2.6	-16.5	-9.55	64	7.58053	8.42954	4.52196	0.218801	-5.71433
	dr	0.984766		(1+0.033*cos(2*3.14/365*DOY))		2009	1	5	5	0.6	-7	-3.2	94	18.5102	11.2542	8.16465	0.699131	-1.12182
	δ	0.120494		(0.409*sin(2*3.14/365*DOY-1.39))		2009	1	6	6	2	-0.8	0.6	73	30.2142	6.76798	8.08928	0.872963	0.105614
	tan(δ)	0.121081				2009	1	7	7	8.8	-0.2	4.3	78.5	9.60393	6.91483	4.60989	0.597517	0.62194
	sin(δ)	0.120203				2009	1	8	8	5.4	0.2	2.8	65.5	21.0695	8.76491	7.68733	0.928776	0.529329
	cos(δ)	0.992749				2009	1	9	9	7	-1.2	2.9	69.5	17.8201	11.69	8.16465	0.991233	0.692079
	X	0.991849				2009	1	10	10	5.4	-8.7	-1.65	65.5	14.3423	16.1781	8.61685	0.816185	-0.699936		-
	ωs (eq. 25)	1.49314		(acos{(-1*tan(-0.35)*tan(0.409*sin(2*3.14/365*DOY-1.39))))		2009	1	11	11	3.6	-9.4	-2.9	67	16.4174	17.0741	9.47099	0.827656	-1.42384
	sin ωs	0.996986				2009	1	12	12	6.4	-8.4	-1	67	13.5195	16.007	8.32166	0.81995	-0.40072
	sin φ*sin δ	-0.0718532		(sin(0.35)*sin(0.409*sin(2*3.14/365*DOY-1.39)))		2009	1	13	13	9.2	-8.4	0.4	81.5	13.6606	19.2342	9.16953	0.978783	0.171701
	cos φ*cos δ	0.795859		(cos(0.35)*cos(0.409*sin(2*3.14/365*DOY-1.39))		2009	1	14	14	10	-6.8	1.6	70	12.0284	16.1662	7.88831	0.89754	0.545487
	Gsc	0.082				2009	1	15	15	8.6	-7.8	0.4	72	9.73164	12.7679	6.30562	0.673081	0.119635
						2009	1	16	16	8.8	-5.8	1.5	65	13.9302	16.2705	8.51636	0.964005	0.517432
	Ra	25.4105				2009	1	17	17	11.6	2.6	7.1	49.5	17.8994	12.8876	8.59172	1.25472	1.50231
						2009	1	18	18	11.8	-5.8	3	62	11.0408	15.5454	7.41099	0.904081	0.911164
						2009	1	19	19	11	-3.8	3.6	95	14.5704	17.2514	8.96855	1.12565	1.16048
						2009	1	20	20	11.2	-5.4	2.9	100	14.4515	19.1915	9.42075	1.14373	1.06883
						2009	1	21	21	11.4	-5.4	3	99	13.8289	18.586	9.06904	1.10635	1.06826
						2009	1	22	22	12.4	-5.8	3.3	68	11.5197	16.7727	7.86319	0.973081	1.05446
						2009	1	23	23	10.4	-7.8	1.3	71.5	14.8137	21.5688	10.1116	1.13272	0.584938
						2009	1	24	24	6.4	-2.4	2	79.5	18.1811	12.7995	8.62941	1.00211	0.543028
						2009	1	25	25	7.8	2.2	5	77.5	24.2011	10.8421	9.16325	1.22533	1.00224
						2009	1	26	26	11	4.6	7.8	78.5	25.1982	12.9015	10.1995	1.5314	1.58989
						2009	1	27	27	10.2	2.6	6.4	73	4.78417	2.90878	2.11025	0.299514	0.463438
						2009	1	28	28	7.8	0.6	4.2	98.5	4.2716	2.46044	1.83391	0.236629	0.308577
						2009	1	29	29	14.8	0.8	7.8	56	14.5193	16.2616	8.69221	1.30508	1.94624
						2009	1	30	30	11.4	5.6	8.5	97	25.7524	11.9491	9.92319	1.53065	1.57417
						2009	1	31	31	13.4	5.8	9.6	60.5	25.6864	15.6174	11.33	1.82075	2.14216
						2009	2	1	32	9	4.8	6.9	89.5	31.2969	10.5158	10.2623	1.48666	1.23122
						2009	2	2	33	6.6	2.6	4.6	99	34.111	10.9155	10.9155	1.43404	0.946217
						2009	2	3	34	8.4	1	4.7	99	23.0587	13.6508	10.0362	1.32441	1.16418
						2009	2	4	35	11.2	-1.6	4.8	99	21.1532	21.6609	12.1088	1.60501	1.78492
						2009	2	5	36	11.6	-0.4	5.6	98.5	20.1699	19.3631	11.1793	1.53426	1.80789
						2009	2	6	37	14.8	2.6	8.7	96.5	18.3406	17.9005	10.2498	1.59305	2.27486
						2009	2	7	38	15.2	2	8.6	76	7.62767	8.05482	4.43403	0.686548	1.14602
						2009	2	8	39	15.6	1	8.3	73.5	17.7929	20.7821	10.8778	1.66514	2.52574
						2009	2	9	40	12.6	7.4	10	69	32.2928	13.4338	11.7822	1.92106	1.92495
						2009	2	10	41	15.8	6.8	11.3	76	16.434	11.8325	7.88831	1.34631	1.85439
						2009	2	11	42	13	2.6	7.8	72	15.8965	13.2259	8.20233	1.23153	1.62429
						2009	2	12	43	12.6	-1.4	5.6	71	12.7988	14.3347	7.66221	1.05157	1.38414
						2009	2	13	44	15.6	7.2	11.4	95	23.7013	15.9273	10.9909	1.88228	2.41186
						2009	2	14	45	17.3	1.6	9.45	99.5	23.2012	29.1408	14.7089	2.3508	3.74194
						2009	2	15	46	17.4	3.6	10.5	100	16.2725	17.9649	9.67197	1.60535	2.55995
						2009	2	16	47	16.6	7.4	12	82	8.74837	6.4388	4.24562	0.742036	1.17508
						2009	2	17	48	12.2	3.2	7.7	82	9.94412	7.15977	4.77318	0.713865	0.972652
						2009	2	18	49	9.6	-5.4	2.1	76	21.6891	26.027	13.4403	1.56866	1.07042
						2009	2	19	50	10.6	-2.2	4.2	59.5	27.6045	28.267	15.8017	2.0389	2.05858
						2009	2	20	51	13.3	3.6	8.45	76.5	31.2565	24.255	15.5756	2.39797	2.94289
						2009	2	21	52	9	2.8	5.9	81.5	41.3659	20.5175	16.48	2.29073	1.97842
						2009	2	22	53	8.2	1.6	4.9	80.5	37.8926	20.0073	15.5756	2.07367	1.68672
						2009	2	23	54	10.8	2.2	6.5	79	14.1883	9.76156	6.65733	0.948799	1.11074
						2009	2	24	55	12.7	4.6	8.65	81	14.3438	9.2948	6.53172	1.01326	1.29084
						2009	2	25	56	10.2	4.8	7.5	83	22.3986	9.6762	8.32794	1.23574	1.21584
						2009	2	26	57	11.4	1.8	6.6	92	32.5084	24.9664	16.1158	2.30626	2.56285
						2009	2	27	58	12.4	5.6	9	85.5	39.1676	21.3072	16.3419	2.56865	2.71992
						2009	2	28	59	7.7	3.8	5.75	87.5	44.9609	14.0278	14.2065	1.96221	1.38458
						2009	3	1	60	10.4	3.2	6.8	95	36.8938	21.2508	15.8394	2.2853	2.25699
						2009	3	2	61	9.6	1	5.3	68.5	32.6331	22.4516	15.3119	2.07447	1.9863
						2009	3	3	62	5.8	0.2	3	84	26.2746	11.771	9.94831	1.21361	0.716152
						2009	3	4	63	8.3	0.6	4.45	86.5	42.2112	26.0021	18.741	2.44563	1.99244
						2009	3	5	64	10	2.6	6.3	87	41.8751	24.7901	18.226	2.57618	2.46464
						2009	3	6	65	8.8	5.4	7.1	42	59.3367	16.1396	17.5058	2.55653	2.02303
						2009	3	7	66	18.6	1.8	10.2	53	26.5085	35.6275	17.3844	2.85487	4.73264
						2009	3	8	67	22.4	6	14.2	63.5	24.8525	32.6065	16.1032	3.02225	5.23062
						2009	3	9	68	20.6	8.8	14.7	60.5	27.9277	26.3637	15.3495	2.92581	4.36578
						2009	3	10	69	15.6	2.8	9.2	49	11.981	12.2685	6.85831	1.08605	1.71634
						2009	3	11	70	16.8	7.6	12.2	62	38.1512	28.0793	18.5149	3.2577	4.19486
						2009	3	12	71	19	7.6	13.3	56	31.6221	28.8394	17.083	3.11596	4.50607
						2009	3	13	72	20	6.5	13.25	93.5	16.196	17.4916	9.52124	1.7339	2.84713
						2009	3	14	73	16	8.4	12.2	89.5	23.1804	14.0937	10.2247	1.79903	2.25025
						2009	3	15	74	9.4	2.6	6	64.5	49.6143	26.9902	20.7005	2.88952	2.57567
						2009	3	16	75	10.7	2	6.35	49.5	43.331	30.1584	20.4493	2.89643	2.99459
						2009	3	17	76	11.4	-2.5	4.45	35.5	33.986	37.7925	20.2735	2.64561	3.41462
						2009	3	18	77	11.6	-0.4	5.6	58.5	29.1217	27.9568	16.1409	2.21519	2.5321
						2009	3	19	78	15	2.2	8.6	79.5	33.573	34.3788	19.2183	2.97569	4.11974
						2009	3	20	79	12.4	5.8	9.1	88	40.3372	21.2981	16.5805	2.61588	2.73767
						2009	3	21	80	15.6	3.6	9.6	68.5	19.0821	18.3188	10.5764	1.69963	2.46897
						2009	3	22	81	17	-1.8	7.6	58	21.5463	32.4056	14.9476	2.22676	3.59609
						2009	3	23	82	12.2	4.6	8.4	60	37.9886	23.0971	16.7564	2.57483	2.80287
						2009	3	24	83	12.2	5.8	9	79.5	47.2312	24.1824	19.1178	3.00498	3.05416
						2009	3	25	84	14.2	-0.4	6.9	67.5	31.271	36.5246	19.1178	2.76952	3.77153
						2009	3	26	85	15.2	2.6	8.9	56.5	37.7973	38.0997	21.4667	3.3616	4.63947
						2009	3	27	86	16.2	3.6	9.9	48	36.979	37.2748	21.002	3.41199	4.99046
						2009	3	28	87	14	7.8	10.9	73	36.8257	18.2656	14.6712	2.46955	2.65565
						2009	3	29	88	17.2	6	11.6	56.5	33.0761	29.6362	17.711	3.05393	4.289
						2009	3	30	89	20.2	1.6	10.9	51	10.2848	15.3038	7.09696	1.1946	2.26925
						2009	3	31	90	21.4	3	12.2	66	30.2713	44.5593	20.7759	3.65552	6.48631
						2009	4	1	91	21.2	0.4	10.8	96.5	22.3433	37.1792	16.3042	2.73485	5.09587
						2009	4	2	92	22.2	3.6	12.9	71.5	32.3289	48.1054	22.3083	4.01674	7.19467
						2009	4	3	93	20.2	6.6	13.4	51.5	36.6899	39.9186	21.6489	3.96149	6.14449
						2009	4	4	94	15	8.8	11.9	56.5	51.4551	25.5217	20.4996	3.57083	3.78661
						2009	4	5	95	19.2	3.8	11.5	61.5	29.4877	36.3289	18.5149	3.18169	5.16843
						2009	4	6	96	21.2	2.6	11.9	62.5	22.0259	32.7745	15.1988	2.64749	4.78123
						2009	4	7	97	20.6	9.2	14.9	75	28.5529	26.0402	15.4249	2.95827	4.3456
						2009	4	8	98	18	5	11.5	75.5	35.8395	37.2731	20.6754	3.55295	5.29545
						2009	4	9	99	19.6	2.8	11.2	86.5	35.7597	48.061	23.4514	3.98873	6.64597
						2009	4	10	100	17.6	-1	8.3	82	22.936	34.1288	15.8269	2.42272	3.99961
						2009	4	11	101	19.6	-0.2	9.7	55.5	26.9937	42.7581	19.2183	3.09968	5.45985
						2009	4	12	102	21	4.6	12.8	74.5	24.8719	32.6319	16.1158	2.89228	4.95599
						2009	4	13	103	20.2	3.8	12	72.5	31.6763	41.5593	20.5247	3.58724	6.0139
						2009	4	14	104	21.2	-0.7	10.25	50	25.9689	45.4975	19.4444	3.19887	5.98848
						2009	4	15	105	16	9.2	12.6	63.5	45.1587	24.5663	18.8415	3.35936	3.77245
						2009	4	16	106	15.2	5.6	10.4	50.5	32.0776	24.6356	15.9022	2.63012	3.39226
						2009	4	17	107	12.2	7.8	10	69.5	74.2165	26.1242	24.9085	4.06125	3.49856
						2009	4	18	108	14.2	5.5	9.85	84	42.5592	29.6212	20.085	3.25714	3.89658
						2009	4	19	109	19	3.5	11.25	70.5	36.2321	44.9278	22.8233	3.8886	6.24665
						2009	4	20	110	20.4	2.8	11.6	94.5	36.3784	51.2209	24.4186	4.21052	7.20699
						2009	4	21	111	22	4.6	13.3	68	34.9495	48.6498	23.3258	4.25466	7.39223
						2009	4	22	112	23	7.5	15.25	72	35.5342	44.0624	22.3837	4.33882	7.21274
						2009	4	23	113	22.5	10	16.25	77.5	39.88	39.88	22.5596	4.50522	6.76557
						2009	4	24	114	21.8	4.5	13.15	34.5	31.8228	44.0428	21.1778	3.84424	8.15994
						2009	4	25	115	20.8	6.4	13.6	36.5	35.6251	41.0401	21.63	3.98341	7.58409
						2009	4	26	116	20	8.4	14.2	49.5	31.0256	28.7918	16.9071	3.17313	4.68879
						2009	4	27	117	22.4	4.7	13.55	76.5	23.3533	33.0683	15.7201	2.89042	5.17276
						2009	4	28	118	20.8	5.6	13.2	66	38.2995	46.5722	23.891	4.34375	7.06119
						2009	4	29	119	23.4	8.5	15.95	66.5	38.073	45.383	23.5142	4.65449	7.58418
						2009	4	30	120	24.8	5.8	15.3	62	35.4628	53.9035	24.7326	4.80138	8.76492
						2009	5	1	121	24.2	5.8	15	62	36.3109	53.4496	24.921	4.79411	8.60864
						2009	5	2	122	25.6	5.5	15.55	57.5	34.1111	54.8506	24.4688	4.78605	8.98468
						2009	5	3	123	24.5	5.6	15.05	58.5	32.9381	49.8024	22.9113	4.4142	8.0567
						2009	5	4	124	20.6	8.4	14.5	62.5	45.0425	43.9614	25.1722	4.76862	7.01699
						2009	5	5	125	23.2	13.6	18.4	61	51.4357	39.5026	25.4988	5.41373	7.10312
						2009	5	6	126	20.8	9.6	15.2	62.5	41.3803	37.0768	22.1576	4.28849	6.11105
						2009	5	7	127	22.4	7.5	14.95	54.5	37.3815	44.5587	23.0871	4.43454	7.21848
						2009	5	8	128	22.8	4.6	13.7	56.5	30.1795	43.9414	20.6	3.80581	6.81168
						2009	5	9	129	22.6	6.5	14.55	73.5	32.6353	42.0342	20.9517	3.97523	6.73511
						2009	5	10	130	24	4.2	14.1	81.5	26.0763	41.3049	18.5652	3.47342	6.51818
						2009	5	11	131	24	4.8	14.4	79.5	34.758	53.3884	24.3683	4.60203	8.42365
						2009	5	12	132	24.2	5.4	14.8	88	28.499	42.8625	19.771	3.7802	6.92088
						2009	5	13	133	25.5	5.4	15.45	76.5	34.006	54.6816	24.3935	4.757	8.92965
						2009	5	14	134	27.4	4.5	15.95	63	32.6795	59.8689	25.0215	4.95285	9.89841
						2009	5	15	135	29.4	6.4	17.9	37	15.0601	27.7106	11.5561	2.41963	5.95969
						2009	5	16	136	30.8	7.4	19.1	57	32.1987	60.2759	24.921	5.39337	10.829
						2009	5	17	137	31.4	9	20.2	84.5	27.9997	50.1754	21.203	4.72551	9.29789
						2009	5	18	138	31.4	9.6	20.5	58.5	22.7328	39.646	16.9825	3.81476	7.47133
						2009	5	19	139	33.4	8.5	20.95	70	32.8814	65.4998	26.2525	5.96637	12.2104
						2009	5	20	140	34	12	23	67	31.701	55.7937	23.7905	5.69288	10.8608
						2009	5	21	141	32.6	20.6	26.6	57	46.0055	44.1653	25.4988	6.64005	9.16877
						2009	5	22	142	29.8	9.6	19.7	56.5	35.0309	56.6099	25.1911	5.54046	10.3308
						2009	5	23	143	30	11.6	20.8	39.5	37.1894	54.7428	25.524	5.77834	11.7717
						2009	5	24	144	29.6	8.6	19.1	53.5	34.2629	57.5617	25.122	5.43687	10.3577
						2009	5	25	145	28.5	11	19.75	39.5	38.0211	53.2295	25.4486	5.60456	11.2086
						2009	5	26	146	28.4	5.5	16.95	47.5	22.1473	40.5738	16.9573	3.45606	7.26708
						2009	5	27	147	27.6	4.8	16.2	59	34.4939	62.9169	26.353	5.25505	10.4636
						2009	5	28	148	27.4	5.6	16.5	63.5	36.5877	63.8089	27.3327	5.49851	10.7007
						2009	5	29	149	27.6	5.5	16.55	61	34.9023	61.7073	26.2525	5.2889	10.3744
						2009	5	30	150	31.2	4	17.6	57	33.5077	72.9128	27.9608	5.80525	12.5526
						2009	5	31	151	32.4	7	19.7	51	34.2697	69.636	27.6342	6.0778	12.6234
						2009	6	1	152	32.2	9	20.6	63.5	33.8693	62.8614	26.1018	5.87853	11.6511
						2009	6	2	153	33.2	9.6	21.4	58	33.5325	63.3094	26.0641	5.99234	11.9192
						2009	6	3	154	34.6	10.6	22.6	50	33.5884	64.4898	26.3279	6.23828	12.4058
						2009	6	4	155	36.2	12.8	24.5	62	36.5643	68.4484	28.2999	7.02092	13.563
						2009	6	5	156	32.2	12	22.1	34.5	34.6117	55.9325	24.8896	5.82451	13.0871
						2009	6	6	157	32.2	10.6	21.4	44.5	35.7263	61.735	26.5665	6.10785	12.5462
						2009	6	7	158	31.6	11.8	21.7	60	35.4977	56.2283	25.2727	5.85487	10.6896
						2009	6	8	159	31.4	11.2	21.3	70.5	37.5899	60.7452	27.0313	6.19885	11.4298
						2009	6	9	160	33	15.4	24.2	72.5	37.2018	52.3802	24.9713	6.15117	10.4244
						2009	6	10	161	34.2	14.6	24.4	56.5	36.6713	57.5007	25.9761	6.42917	11.4402
						2009	6	11	162	33.4	13.8	23.6	66.5	30.7486	48.2138	21.7808	5.28861	9.53426
						2009	6	12	163	35.4	18.6	27	66.5	41.2664	55.462	27.0627	7.11077	11.4693
						2009	6	13	164	34.4	19.8	27.1	55	44.6671	52.1711	27.3076	7.19115	10.8277
						2009	6	14	165	33.8	16	24.9	54	41.179	58.6389	27.7975	6.96148	11.7485
						2009	6	15	166	36.2	14.6	25.4	44.5	35.2195	60.8593	26.1897	6.63563	13.2329
						2009	6	16	167	36.4	17	26.7	41	37.1985	57.7321	26.2148	6.84187	13.4007
						2009	6	17	168	32.6	20.6	26.6	38	49.6089	47.6245	27.496	7.16013	11.5438
						2009	6	18	169	33.6	15	24.3	38.5	40.0106	59.5358	27.6091	6.81714	13.753
						2009	6	19	170	33.6	13.8	23.7	36	39.1674	62.0411	27.8854	6.78724	14.61
						2009	6	20	171	33.6	16.8	25.2	39	42.5688	57.2125	27.9168	7.04048	13.3351
						2009	6	21	172	34	18.6	26.3	34	41.5709	51.2153	26.1018	6.75113	12.9282
						2009	6	22	173	37.2	19.6	28.4	24	40.9912	57.7157	27.5149	7.45551	16.6382
						2009	6	23	174	37.8	19.5	28.65	29.5	40.1721	58.8119	27.496	7.49072	16.0208
						2009	6	24	175	37.4	17	27.2	22.5	37.8397	61.7544	27.3453	7.21711	17.7684
						2009	6	25	176	36.5	16.6	26.55	32	37.3442	59.452	26.6544	6.93316	15.3254
						2009	6	26	177	36.4	15	25.7	27.5	36.4359	62.3782	26.9685	6.8804	16.6759
						2009	6	27	178	37.4	21.4	29.4	27	41.8831	53.6103	26.8052	7.42042	15.1904
						2009	6	28	179	37	17.6	27.3	24	36.0489	55.9479	25.4046	6.71981	15.9246
						2009	6	29	180	38.2	15.5	26.85	27.5	35.8715	65.1427	27.3453	7.16097	17.6699
						2009	6	30	181	38.8	16	27.4	39	35.6201	64.9711	27.2134	7.21422	15.5455
						2009	7	1	182	39.8	15.6	27.7	34	34.7261	67.2296	27.3327	7.29395	17.1266
						2009	7	2	183	39.6	16.5	28.05	43	36.605	67.646	28.1492	7.56961	15.4943
						2009	7	3	184	38.4	17.2	27.8	43.5	37.3064	63.2717	27.4835	7.35029	14.383
						2009	7	4	185	37.6	17.6	27.6	36	40.0068	64.0108	28.6265	7.62241	15.9312
						2009	7	5	186	36.8	15.5	26.15	46.5	37.0146	63.0729	27.3327	7.04547	13.4789
						2009	7	6	187	36	21.2	28.6	37	43.5071	51.5125	26.7801	7.28782	12.9243
						2009	7	7	188	36.8	22.2	29.5	56	45.982	53.707	28.1115	7.79854	11.4666
						2009	7	8	189	38.8	23.5	31.15	18.5	46.0618	56.3797	28.8275	8.27614	17.7397
						2009	7	9	190	37.8	20.6	29.2	17	40.2631	55.4021	26.7172	7.36474	17.3248
						2009	7	10	191	39	18.6	28.8	25	36.9011	60.2226	26.667	7.28833	17.2378
						2009	7	11	192	39.8	17.5	28.65	33	35.1112	62.6384	26.5288	7.22723	16.3688
						2009	7	12	193	40.8	18.8	29.8	31.5	34.9648	61.5381	26.2399	7.32551	16.588
						2009	7	13	194	39.8	19.4	29.6	41	36.1537	59.0028	26.1269	7.2633	14.1853
						2009	7	14	195	37.8	17.3	27.55	64.5	35.3371	57.9529	25.5993	6.80885	12.0516
						2009	7	15	196	34	18	26	50	41.8635	53.5852	26.7926	6.88267	10.9449
						2009	7	16	197	35	16.2	25.6	26	38.0772	57.2681	26.4158	6.7239	15.5806
						2009	7	17	198	36.4	19.5	27.95	24.5	37.869	51.1989	24.9085	6.68353	14.6664
						2009	7	18	199	37.4	20.4	28.9	24	38.1954	51.9457	25.1974	6.90145	15.1234
						2009	7	19	200	38.8	20.6	29.7	21	38.2029	55.6234	26.0766	7.26462	16.8122
						2009	7	20	201	39.2	20.6	29.9	27.5	36.9161	54.9311	25.4737	7.12654	15.5549
						2009	7	21	202	40.4	20.8	30.6	35.5	33.905	53.1631	24.0166	6.81751	13.875
						2009	7	22	203	40.6	24	32.3	36.5	38.884	51.638	25.3481	7.4482	13.5673
						2009	7	23	204	40.2	24.6	32.4	25.5	37.7059	47.057	23.8282	7.01558	14.0591
						2009	7	24	205	39.2	25.2	32.2	24	34.2631	38.3746	20.5121	6.01518	11.7361
						2009	7	25	206	36.2	21.4	28.8	30.5	39.0585	46.2452	24.0418	6.57083	12.5971
						2009	7	26	207	37.2	17.4	27.3	25	34.3156	54.3559	24.4311	6.46232	15.3265
						2009	7	27	208	38.8	20	29.4	30	35.7053	53.7007	24.7703	6.85711	14.7242
						2009	7	28	209	38.4	19.8	29.1	27	35.0412	52.1412	24.1799	6.65114	14.7384
						2009	7	29	210	35.8	16.6	26.2	19.5	34.6147	53.1682	24.2679	6.26256	15.6398
						2009	7	30	211	38.2	16.3	27.25	29	30.5319	53.4919	22.861	6.0403	14.447
						2009	7	31	212	39.6	16.2	27.9	26.5	32.0202	59.9417	24.7829	6.64256	16.7046
						2009	8	1	213	36.6	17.4	27	30	33.5576	51.5445	23.5268	6.1817	13.7425
						2009	8	2	214	35.6	17.2	26.4	51	33.9683	50.0013	23.3132	6.04355	10.2975
						2009	8	3	215	37.4	17.6	27.5	43.5	32.8865	52.0922	23.4137	6.22066	11.8775
						2009	8	4	216	37.2	17.3	27.25	40	31.5719	50.2624	22.5344	5.95401	11.9627
						2009	8	5	217	39.2	18	28.6	47.5	30.7335	52.124	22.6412	6.16149	11.4181
						2009	8	6	218	39.6	19.6	29.6	63	31.4577	50.3324	22.5093	6.25761	10.7854
						2009	8	7	219	38.4	21.4	29.9	65.5	33.2829	45.2647	21.9566	6.1426	9.77575
						2009	8	8	220	37	19.6	28.3	63	28.1554	39.1923	18.7913	5.08071	8.36419
						2009	8	9	221	35.4	22.7	29.05	52	32.3391	32.8566	18.4395	5.06673	7.14441
						2009	8	10	222	35.2	18.8	27	45	34.8556	45.7305	22.5847	5.93417	10.2107
						2009	8	11	223	34.6	17.8	26.2	39	33.672	45.2551	22.0822	5.69854	10.8001
						2009	8	12	224	33.8	19.6	26.7	46.5	39.5105	44.884	23.8219	6.21735	9.79002
						2009	8	13	225	35.7	15.8	25.75	70	33.5664	53.4377	23.958	6.11937	10.8773
						2009	8	14	226	36.2	14.6	25.4	54.5	30.8783	53.3577	22.9615	5.81771	10.8068
						2009	8	15	227	38.4	15	26.7	62.5	27.7032	51.8604	21.4416	5.5961	10.7086
						2009	8	16	228	39.4	16.6	28	70.5	26.2404	47.8624	20.0474	5.38506	10.0834
						2009	8	17	229	41	18.6	29.8	62	29.0281	52.0183	21.9817	6.13673	11.1574
						2009	8	18	230	40	18.6	29.3	69	30.7338	52.6162	22.748	6.28393	11.2166
						2009	8	19	231	40.8	19.8	30.3	75	28.7637	48.3231	21.0899	5.9496	10.4532
						2009	8	20	232	39	20.2	29.6	91	29.6578	44.6054	20.5749	5.71985	9.6071
						2009	8	21	233	37	17.6	27.3	67	23.3672	36.2658	16.4675	4.35584	7.67389
						2009	8	22	234	36.2	15.4	25.8	67.5	25.3901	42.2491	18.5275	4.73773	8.69178
						2009	8	23	235	36	13.8	24.9	55	20.1444	35.7764	15.1862	3.80318	7.32559
						2009	8	24	236	37	12.8	24.9	62.5	9.79862	18.9701	7.71245	1.93147	4.07426
						2009	8	25	237	37.5	14.2	25.85	75	21.0618	39.2592	16.2665	4.16434	8.11144
						2009	8	26	238	35.2	16	25.6	73	24.9935	38.3901	17.5226	4.46022	7.91256
						2009	8	27	239	35.2	14.8	25	77	26.7502	43.6564	19.3314	4.8526	8.86337
						2009	8	28	240	36.4	16.6	26.5	78.5	24.7707	39.2368	17.6356	4.58208	8.18072
						2009	8	29	241	36.2	15.8	26	73.5	23.2044	37.8696	16.7689	4.30772	7.85547
						2009	8	30	242	35.6	16.2	25.9	75	29.5164	45.8095	20.801	5.33131	9.40306
						2009	8	31	243	36.4	17.4	26.9	71	29.9516	45.5264	20.8889	5.47636	9.47669
						2009	9	1	244	36.6	15	25.8	48.5	27.5337	47.5783	20.4744	5.2356	9.94508
						2009	9	2	245	36	15.2	25.6	51.5	27.4041	45.6004	19.9971	5.09008	9.32195
						2009	9	3	246	35.4	14	24.7	54	27.0851	46.3697	20.0474	4.99705	9.34649
						2009	9	4	247	37	14.4	25.7	66.5	27.5617	49.8316	20.9643	5.34857	10.1636
						2009	9	5	248	36.4	14	25.2	68.5	23.4464	42.0159	17.755	4.47772	8.57103
						2009	9	6	249	36.2	12.4	24.3	71.5	25.5062	48.5637	19.9092	4.91591	9.70927
						2009	9	7	250	36.4	15.4	25.9	72	24.7207	41.5308	18.1255	4.64558	8.56311
						2009	9	8	251	35.8	18.6	27.2	87	30.5144	41.9878	20.2483	5.34404	8.80721
						2009	9	9	252	35.6	17.4	26.5	88.5	24.5301	35.7158	16.7438	4.35037	7.48372
						2009	9	10	253	32	16.5	24.25	80	30.7085	38.0786	19.3439	4.77067	7.69344
						2009	9	11	254	33.4	13.6	23.5	80.5	27.5054	43.5685	19.5826	4.74339	8.63954
						2009	9	12	255	34	15.8	24.9	80	27.9345	40.6726	19.0676	4.7752	8.27279
						2009	9	13	256	34.4	25	29.7	58	32.9164	24.7531	16.1472	4.4984	5.52897
						2009	9	14	257	32.5	17	24.75	35	20.4989	25.4187	12.9127	3.22244	6.44749
						2009	9	15	258	34.1	15.8	24.95	30	26.5	38.796	18.1381	4.54774	10.1773
						2009	9	16	259	33.4	14.7	24.05	22.5	26.3603	39.435	18.2386	4.47666	11.0426
						2009	9	17	260	30.3	16.5	23.4	19.5	29.9457	33.0601	17.7989	4.3009	9.53324
						2009	9	18	261	27.2	15.9	21.55	16.5	31.4231	28.4065	16.9008	3.9005	8.24163
						2009	9	19	262	29	10.7	19.85	30.5	26.2523	38.4333	17.9685	3.96776	9.14848
						2009	9	20	263	23.5	16	19.75	34.5	38.8143	23.2886	17.0076	3.7456	5.46147
						2009	9	21	264	23.2	13.7	18.45	39.5	34.5257	26.2395	17.0264	3.61993	5.57056
						2009	9	22	265	26.6	10.9	18.75	44.5	27.58	34.6404	17.4849	3.74817	6.82282
						2009	9	23	266	26.4	7.7	17.05	56.5	9.47663	14.177	6.55684	1.34019	2.68267
						2009	9	24	267	28.8	9.4	19.1	76.5	23.9197	37.1234	16.8569	3.64814	6.80887
						2009	9	25	268	30.1	9	19.55	63.5	25.1235	42.4085	18.4647	4.04483	7.80559
						2009	9	26	269	30	10	20	62	20.5037	32.8059	14.6712	3.25257	6.18156
						2009	9	27	270	28.7	10.9	19.8	58	16.3004	23.2118	11.0034	2.42652	4.46271
						2009	9	28	271	22.8	9.4	16.1	37	28.2018	30.2324	16.5177	3.28411	6.1505
						2009	9	29	272	23.1	4.1	13.6	27.5	24.2782	36.9029	16.9322	3.11826	7.59564
						2009	9	30	273	25.6	4.2	14.9	44	16.9536	29.0246	12.5484	2.40661	5.21863
						2009	10	1	274	27.1	5.7	16.4	53	24.5056	41.9535	18.1381	3.63819	7.13112
						2009	10	2	275	29.2	7.3	18.25	53.5	22.9828	40.2658	17.2086	3.63846	7.20686
						2009	10	3	276	31	7.3	19.15	49	21.3832	40.5426	16.6559	3.60953	7.51696
						2009	10	4	277	31.2	8.8	20	54	21.7296	38.9394	16.4549	3.648	7.26807
						2009	10	5	278	32.2	9.2	20.7	75	20.9859	38.6141	16.1032	3.63614	7.31648
						2009	10	6	279	31.2	12.8	22	80	24.1585	35.5613	16.5805	3.87034	6.94004
						2009	10	7	280	29.2	12.3	20.75	65.5	26.3536	35.6301	17.3342	3.91918	6.78697
						2009	10	8	281	28.7	9.6	19.15	66.5	24.1068	36.8352	16.8569	3.65308	6.76661
						2009	10	9	282	29.5	10.1	19.8	61	20.6758	32.0888	14.5708	3.2132	6.02843
						2009	10	10	283	28.7	12	20.35	66	23.514	31.4148	15.3747	3.44008	5.9792
						2009	10	11	284	28.4	9.2	18.8	71	20.9713	32.2119	14.7027	3.15606	5.91454
						2009	10	12	285	30.1	9.4	19.75	68.5	18.5579	30.7319	13.5094	2.97518	5.7828
						2009	10	13	286	31.7	15	23.35	72.5	22.8225	30.4908	14.9225	3.60146	6.14957
						2009	10	14	287	29.2	10.8	20	80.5	18.009	26.5093	12.36	2.74018	5.06616
						2009	10	15	288	30	8.2	19.1	76	12.3332	21.5091	9.21349	1.99397	4.09766
						2009	10	16	289	30.7	8.2	19.45	66	16.9147	30.4464	12.8373	2.80459	5.69458
						2009	10	17	290	31.6	9.1	20.35	27.5	19.2649	34.6768	14.621	3.27145	8.67033
						2009	10	18	291	23.3	11.3	17.3	37.5	26.3342	25.2808	14.5959	3.00473	5.3561
						2009	10	19	292	31.7	9.3	20.5	42.5	18.213	32.6378	13.792	3.09809	6.88284
						2009	10	20	293	31.4	7.9	19.65	84	18.4942	34.7692	14.3447	3.15072	6.47987
						2009	10	21	294	30.3	8.4	19.35	73	19.0069	33.3001	14.2316	3.10085	6.18014
						2009	10	22	295	29.9	12.8	21.35	61.5	9.96702	13.6349	6.59452	1.5142	2.86314
						2009	10	23	296	29.1	10.5	19.8	45	15.4454	22.9828	10.658	2.35035	4.7382
						2009	10	24	297	28.8	8.2	18.5	53	15.8959	26.1965	11.5436	2.45762	4.84248
						2009	10	25	298	27.8	8.4	18.1	54.5	16.5763	25.7263	11.6817	2.45963	4.71533
						2009	10	26	299	27.2	7.6	17.4	50.5	13.335	20.9093	9.44587	1.95008	3.82896
						2009	10	27	300	23.2	9.3	16.25	40	17.6563	19.6338	10.5324	2.10335	4.00215
						2009	10	28	301	20	12.8	16.4	44	20.0414	11.5439	8.60428	1.72587	2.39668
						2009	10	29	302	18.4	12.8	15.6	46.5	23.2556	10.4185	8.80526	1.72487	2.07568
						2009	10	30	303	16.3	13.6	14.95	95	48.2552	10.4231	12.6866	2.43683	1.93629
						2009	10	31	304	17.4	13.4	15.4	58.5	36.6232	11.7194	11.7194	2.28198	2.16862
						2009	11	1	305	17.3	12.8	15.05	46	39.3397	14.1623	13.3523	2.57253	2.66749
						2009	11	2	306	18.9	10.9	14.9	57	24.9805	15.9875	11.3049	2.16812	2.79265
						2009	11	3	307	15.4	9.6	12.5	64.5	28.9144	13.4163	11.1416	1.97997	2.18497
						2009	11	4	308	16.6	9	12.8	55.5	23.2374	14.1283	10.2498	1.83952	2.31491
						2009	11	5	309	17.7	12.5	15.1	79	28.9878	12.0589	10.5764	2.0408	2.20037
						2009	11	6	310	17.5	8.7	13.1	67.5	23.7121	16.6934	11.2547	2.03966	2.71456
						2009	11	7	311	18.6	5.5	12.05	75	19.9118	20.8676	11.531	2.01873	3.17036
						2009	11	8	312	20.5	5.4	12.95	82.5	14.2633	17.2301	8.86807	1.59934	2.77497
						2009	11	9	313	22.5	8.1	15.3	91	15.5989	17.9699	9.47099	1.83862	3.14008
						2009	11	10	314	21	6.2	13.6	70	17.5498	20.7789	10.8025	1.98939	3.37117
						2009	11	11	315	21.4	4.9	13.15	75	15.7321	20.7664	10.2247	1.856	3.30991
						2009	11	12	316	22.9	5.5	14.2	49	13.626	18.9674	9.09416	1.70679	3.21982
						2009	11	13	317	22.6	6.5	14.55	68	9.37188	12.071	6.01672	1.14157	2.16153
						2009	11	14	318	20.1	10.5	15.3	71.5	16.9763	13.0378	8.41587	1.63379	2.36803
						2009	11	15	319	17.9	4.4	11.15	70	17.072	18.4377	10.0362	1.70407	2.71335
						2009	11	16	320	13.2	1.9	7.55	70.5	17.0135	15.3802	9.15069	1.3605	1.81326
						2009	11	17	321	12	3.5	7.75	66	20.8553	14.1816	9.72849	1.45782	1.71835
						2009	11	18	322	15.6	7.5	11.55	63	19.1987	12.4407	8.74246	1.50491	1.9596
						2009	11	19	323	15.4	2.6	9	84	8.42617	8.6284	4.82342	0.758155	1.24601
						2009	11	20	324	14.6	2.1	8.35	74	11.2246	11.2246	6.34959	0.973834	1.47601
						2009	11	21	325	16.4	5.3	10.85	71	10.7922	9.58343	5.75294	0.966679	1.5189
						2009	11	22	326	15	0.9	7.95	56.5	11.9171	13.4425	7.15977	1.0813	1.66796
						2009	11	23	327	15	-0.8	7.1	30.5	6.35963	8.03857	4.04464	0.590673	1.28974
						2009	11	24	328	16	-0.4	7.8	33	11.6896	15.3368	7.57428	1.13723	2.29699
						2009	11	25	329	11	2	6.5	41.5	13.7124	9.87295	6.58196	0.938058	1.25732
						2009	11	26	330	14.2	1.3	7.75	33	15.0601	15.542	8.65453	1.29689	2.31423
						2009	11	27	331	13.9	-1.3	6.3	38.5	16.3709	19.907	10.2121	1.44344	2.34826
						2009	11	28	332	13.5	-3.2	5.15	65.5	1.94029	2.59223	1.26866	0.170764	0.370977
						2009	11	29	333	15	-4.1	5.45	36.5	7.65239	11.6929	5.35099	0.729667	1.35829
						2009	11	30	334	13.1	-2.9	5.1	43	11.8937	15.2239	7.61197	1.02235	1.49804
						2009	12	1	335	14.8	-2.7	6.05	34	15.5575	21.7805	10.4131	1.45658	2.61292
						2009	12	2	336	15.3	-3.6	5.85	36.5	11.8642	17.9387	8.25258	1.14469	2.07803
						2009	12	3	337	13.9	-4.1	4.9	39	12.1387	17.4797	8.24002	1.09704	1.72853
						2009	12	4	338	12	-1.3	5.35	59	13.5619	14.4298	7.91343	1.07444	1.34634
						2009	12	5	339	13.9	0.4	7.15	80.5	13.632	14.7225	8.01392	1.17269	1.68239
						2009	12	6	340	12.5	4.9	8.7	68	15.8903	9.66129	7.00904	1.08936	1.33727
						2009	12	7	341	9.1	5.3	7.2	76.5	21.4252	6.51325	6.68245	0.979815	0.864975
						2009	12	8	342	11.6	5.7	8.65	61	18.2288	8.60398	7.0844	1.099	1.21251
						2009	12	9	343	11.6	5.8	8.7	68	1.46691	0.680645	0.565245	0.0878518	0.315292
						2009	12	10	344	8.6	4	6.3	75.5	22.3283	8.2168	7.66221	1.08303	0.945032
						2009	12	11	345	9.9	5	7.45	66.5	23.1235	9.06442	8.18977	1.21283	1.14749
						2009	12	12	346	10.5	6.8	8.65	74.5	26.9369	7.97332	8.29026	1.28606	1.14101
						2009	12	13	347	10.4	7.2	8.8	71.5	25.8929	6.62859	7.41099	1.15618	0.999341
						2009	12	14	348	11.5	3.2	7.35	74	17.0312	11.3087	7.85062	1.158	1.36595
						2009	12	15	349	8.6	-2.3	3.15	77	12.6979	11.0726	6.70757	0.824171	0.708168
						2009	12	16	350	7.8	1.4	4.6	68	17.0057	8.70692	6.88343	0.904317	0.785531
						2009	12	17	351	9.9	6.8	8.35	32.5	25.5938	6.34727	7.21001	1.1058	1.16916
						2009	12	18	352	9.6	7.1	8.35	42	31.2806	6.25612	7.91343	1.21368	1.03096
						2009	12	19	353	11.3	7.2	9.25	20.5	19.4633	6.38396	6.30562	1.00038	1.4243
						2009	12	20	354	12.6	8.4	10.5	37	23.1375	7.7742	7.58684	1.25926	1.49298
						2009	12	21	355	13.5	7.3	10.4	33	8.9542	4.44128	3.56732	0.59001	1.03034
						2009	12	22	356	14.6	9	11.8	36	4.77719	2.14018	1.80878	0.314012	0.692866
						2009	12	23	357	11.1	3.4	7.25	37.5	10.2982	6.34368	4.5722	0.67174	1.00402
						2009	12	24	358	11.9	3.5	7.7	39.5	6.06754	4.07739	2.81366	0.420805	0.745805
						2009	12	25	359	14.6	5.7	10.15	40	12.9998	9.25585	6.20513	1.01719	1.62225
						2009	12	26	360	9.4	2.3	5.85	39	14.9671	8.50133	6.38099	0.885089	1.06598
						2009	12	27	361	11.8	6.4	9.1	34	18.7162	8.08539	6.95879	1.09788	1.46331
						2009	12	28	362	7.4	2.3	4.85	40	19.0502	7.77248	6.88343	0.91441	0.853731
						2009	12	29	363	12.3	6.7	9.5	36	7.69659	3.44807	2.91415	0.466598	0.798839
						2009	12	30	364	12.4	9.5	10.95	28.5	27.8447	6.45996	7.58684	1.27928	1.46193
						2009	12	31	365	11.8	5.7	8.75	37	8.64586	4.21918	3.41659	0.532017	0.854396
																	1215.53	2224.37
																	ETo-HS	ETo-TURC (Ousman Couly (2016)

## Sheet: 2010
	BATMAN					year	month	day	DOY	Tmax	Tmin	Tmean	RHmean.	Ra	Rs=0.16(Tmax-Tmin)^0.5*Ra	Rs=from meteorological station	ETo-HS	ETo-TURC (Ousman Couly (2016)
	DOY	246					#	#		°C	°C	°C	%	MJ m-2 day-1*(0.408 mm day-1)
	φ (-)	36.71	0.64071			2010	1	1	1	12.1	0.1	6.1	68.5	14.1189	13.5542	7.8255	1.09693	1.40204
	tan(φ)		0.745649			2010	1	2	2	10.8	4.1	7.45	64.5	8.61361	4.61689	3.56732	0.528289	0.689959
	sin(φ)		0.597765			2010	1	3	3	10.6	6.3	8.45	83.5	25.9713	8.93414	8.61685	1.32662	1.23146
	cos(φ)		0.801671			2010	1	4	4	11.8	7.4	9.6	64	26.423	9.30091	8.86807	1.42511	1.37802
	dr	0.984766		(1+0.033*cos(2*3.14/365*DOY))		2010	1	5	5	8.1	2	5.05	94	5.40366	2.63699	2.13537	0.286172	0.369082
	δ	0.120494		(0.409*sin(2*3.14/365*DOY-1.39))		2010	1	6	6	9.2	-2.4	3.4	73	4.40259	4.08561	2.39915	0.298306	0.353755
	tan(δ)	0.121081				2010	1	7	7	9.1	-2.9	3.1	78.5	1.33711	1.28362	0.741099	0.0908428	0.179119
	sin(δ)	0.120203				2010	1	8	8	10.6	-2.1	4.25	65.5	4.31776	4.38684	2.46196	0.318388	0.443285
	cos(δ)	0.992749				2010	1	9	9	11.9	-2.6	4.65	69.5	15.9574	18.5105	9.72221	1.28012	1.51123
	X	0.991849				2010	1	10	10	11.8	-2.5	4.65	65.5	3.1279	3.57832	1.89252	0.249187	0.415821		-
	ωs (eq. 25)	1.49314		(acos{(-1*tan(-0.35)*tan(0.409*sin(2*3.14/365*DOY-1.39))))		2010	1	11	11	16	-0.6	7.7	67	2.59484	3.44595	1.69155	0.252984	0.582128
	sin ωs	0.996986				2010	1	12	12	13.7	7.7	10.7	67	19.9992	9.59963	7.83806	1.31015	1.50874
	sin φ*sin δ	-0.0718532		(sin(0.35)*sin(0.409*sin(2*3.14/365*DOY-1.39)))		2010	1	13	13	12.4	7.6	10	81.5	10.2482	3.93533	3.59245	0.585738	0.747141
	cos φ*cos δ	0.795859		(cos(0.35)*cos(0.409*sin(2*3.14/365*DOY-1.39))		2010	1	14	14	12.4	6.7	9.55	70	26.7007	12.1755	10.1995	1.63608	1.72029
	Gsc	0.082				2010	1	15	15	12.9	7.7	10.3	72	31.5354	13.1187	11.5059	1.89624	1.91942
						2010	1	16	16	14.2	5.2	9.7	65	23.3949	16.8443	11.2295	1.81118	2.30508
	Ra	25.4105				2010	1	17	17	15.5	5.1	10.3	49.5	20.4974	17.0539	10.5764	1.74305	2.43332
						2010	1	18	18	16.5	7.9	12.2	62	3.85494	2.6522	1.80878	0.318256	0.659375
						2010	1	19	19	15.7	8.3	12	95	6.5511	3.87825	2.85135	0.49835	0.822292
						2010	1	20	20	12.4	9.4	10.9	100	2.85551	0.685323	0.791343	0.133203	0.362078
						2010	1	21	21	13.6	5.8	9.7	99	27.7724	17.33	12.4103	2.00162	2.36421
						2010	1	22	22	12.3	1.8	7.05	68	11.0962	9.32082	5.75294	0.838463	1.13099
						2010	1	23	23	8.9	3.8	6.35	71.5	2.98963	1.21977	1.08025	0.153006	0.305165
						2010	1	24	24	11.7	7	9.35	79.5	14.7022	5.52801	5.09977	0.81206	0.90681
						2010	1	25	25	10.5	2.2	6.35	77.5	7.84798	5.21106	3.61757	0.512391	0.673168
						2010	1	26	26	6.2	-1.3	2.45	78.5	16.6839	10.0103	7.3105	0.868241	0.526659
						2010	1	27	27	4.1	-8	-1.95	73	19.3943	18.7736	10.7941	1.00342	-0.966442
						2010	1	28	28	2	-7.1	-2.55	98.5	23.0057	16.7482	11.1039	0.993149	-1.19611
						2010	1	29	29	5.6	-0.7	2.45	56	34.1239	17.1984	13.7041	1.62758	0.839517
						2010	1	30	30	7.9	0.9	4.4	97	31.987	17.9127	13.5408	1.76305	1.40638
						2010	1	31	31	11.3	5.3	8.3	60.5	31.5372	15.1379	12.36	1.89203	1.90246
						2010	2	1	32	14	5.4	9.7	89.5	21.2022	14.5871	9.94831	1.60454	2.03028
						2010	2	2	33	12.9	0.3	6.6	99	1.4597	1.47138	0.829026	0.118639	0.337341
						2010	2	3	34	14.5	1.5	8	99	2.69994	2.80794	1.55756	0.235686	0.528126
						2010	2	4	35	9.3	2.3	5.8	99	32.7091	18.3171	13.8464	1.91654	1.76403
						2010	2	5	36	7.4	-1.4	3	98.5	17.2548	12.1474	8.18977	0.999087	0.735599
						2010	2	6	37	6.4	-1.2	2.6	96.5	7.88819	4.79602	3.4794	0.416296	0.315348
						2010	2	7	38	8.8	-5.8	1.5	76	6.698	7.82327	4.09489	0.463519	0.279374
						2010	2	8	39	8.4	0.1	4.25	73.5	6.59448	4.37873	3.03976	0.393112	0.44273
						2010	2	9	40	5.3	2.4	3.85	69	36.3272	8.4279	9.89807	1.25683	0.665948
						2010	2	10	41	11.2	1.6	6.4	76	14.8986	11.4421	7.38587	1.0483	1.25457
						2010	2	11	42	9.6	1.5	5.55	72	26.8395	17.392	12.2219	1.67376	1.63108
						2010	2	12	43	12	4.8	8.4	71	22.4405	12.9258	9.63429	1.48043	1.67098
						2010	2	13	44	15.4	4.3	9.85	95	8.48292	7.53283	4.52196	0.733314	1.18243
						2010	2	14	45	17.5	1.2	9.35	99.5	16.5413	21.5699	10.6852	1.70146	2.81635
						2010	2	15	46	13.4	2.2	7.8	100	21.5816	19.3371	11.5561	1.73508	2.2724
						2010	2	16	47	16.4	7.6	12	82	32.3396	22.7671	15.3495	2.68275	3.42475
						2010	2	17	48	17.7	6.8	12.25	82	28.1779	24.5712	14.8848	2.62334	3.71544
						2010	2	18	49	18.1	8.6	13.35	76	20.3681	15.4798	10.0446	1.8351	2.56482
						2010	2	19	50	17.3	6.5	11.9	59.5	26.0466	22.5043	13.6957	2.38566	3.3728
						2010	2	20	51	18.2	2.5	10.35	76.5	20.5067	25.7564	13.0006	2.1464	3.52446
						2010	2	21	52	17	3.5	10.25	81.5	16.6803	18.0147	9.80595	1.61321	2.53001
						2010	2	22	53	14.3	7.1	10.7	80.5	37.5374	21.6216	16.1158	2.69379	3.06036
						2010	2	23	54	11.8	-1.1	5.35	79	28.306	29.2118	16.2665	2.20858	2.55106
						2010	2	24	55	13.2	-0.4	6.4	81	26.4397	28.7664	15.6008	2.21426	2.8607
						2010	2	25	56	10.8	4.8	7.8	83	37.4344	17.9685	14.6712	2.2028	2.12726
						2010	2	26	57	10.6	-0.3	5.15	92	25.5385	22.2696	13.4905	1.81585	1.93003
						2010	2	27	58	12.6	5.1	8.85	85.5	24.7965	14.8779	10.8653	1.69827	1.95184
						2010	2	28	59	11.4	7.9	9.65	87.5	44.3133	12.4077	13.2644	2.13549	1.75943
						2010	3	1	60	11.6	6.6	9.1	95	34.1962	13.6785	12.2344	1.93021	1.84576
						2010	3	2	61	15	0.8	7.9	68.5	20.6667	23.4774	12.4605	1.87818	2.73426
						2010	3	3	62	12.3	6.6	9.45	84	30.3178	13.8249	11.5812	1.85093	1.90686
						2010	3	4	63	14.9	5.9	10.4	86.5	30.1638	21.718	14.4786	2.39467	3.02192
						2010	3	5	64	11.5	1.5	6.5	87	25.5706	20.4565	12.9378	1.84389	2.11308
						2010	3	6	65	15.3	6.3	10.8	42	36.9983	26.6387	17.7592	2.9789	4.15412
						2010	3	7	66	15.6	9.2	12.4	53	41.1178	21.0523	16.6433	2.94792	3.24668
						2010	3	8	67	17.7	6.8	12.25	63.5	4.87467	4.25071	2.575	0.453827	0.883627
						2010	3	9	68	20.1	8.3	14.2	60.5	23.6082	22.2862	12.9755	2.43524	3.67479
						2010	3	10	69	22.1	9.9	16	49	22.2627	21.7284	12.4417	2.4664	3.86539
						2010	3	11	70	19.8	7.8	13.8	62	32.9064	31.5901	18.2386	3.38023	5.0029
						2010	3	12	71	22.8	12.2	17.5	56	29.1165	24.6908	15.1674	3.14018	4.47033
						2010	3	13	72	20.9	12.1	16.5	93.5	39.1674	27.5738	18.5903	3.7398	4.81684
						2010	3	14	73	17.4	10.9	14.15	89.5	43.6486	22.6973	17.8052	3.33646	3.73
						2010	3	15	74	24.7	10.7	17.7	64.5	20.6879	23.1705	12.3851	2.57868	4.23866
						2010	3	16	75	21.5	10.3	15.9	49.5	31.3949	28.1299	16.8108	3.32266	4.85494
						2010	3	17	76	15.8	1.5	8.65	35.5	29.4798	33.7249	17.8366	2.76698	4.90195
						2010	3	18	77	13.6	-1.7	5.95	58.5	22.8202	27.9319	14.2819	1.98937	2.64322
						2010	3	19	78	13.3	-3.2	5.05	79.5	6.8224	9.00556	4.43403	0.594228	0.866339
						2010	3	20	79	15.3	-3.5	5.9	88	28.5835	42.9896	19.8296	2.75633	3.94501
						2010	3	21	80	18	-1.2	8.4	68.5	14.7722	22.6901	10.3565	1.59142	2.75758
						2010	3	22	81	19.2	-3.1	8.05	58	23.7483	42.3669	17.9434	2.7204	4.81311
						2010	3	23	82	22.4	-1	10.7	60	21.5848	40.4067	16.7061	2.79247	5.48489
						2010	3	24	83	24.9	2.3	13.6	79.5	21.4351	38.7546	16.3042	3.00259	6.02101
						2010	3	25	84	23.1	4	13.55	67.5	22.9212	35.0237	16.0278	2.947	5.46045
						2010	3	26	85	24	3.5	13.75	56.5	16.0214	26.275	11.6064	2.14765	4.20542
						2010	3	27	86	22.7	5.2	13.95	48	25.5976	35.8367	17.1332	3.19044	5.82729
						2010	3	28	87	20.6	3.3	11.95	73	23.5368	32.5749	15.6636	2.73304	4.76498
						2010	3	29	88	18.1	11.8	14.95	56.5	44.9929	22.6764	18.069	3.47067	3.83239
						2010	3	30	89	20.3	11.8	16.05	51	45.3458	30.8351	21.1527	4.19946	5.27597
						2010	3	31	90	17.3	3.1	10.2	66	30.1043	34.1984	18.1506	2.9807	4.55333
						2010	4	1	91	19.7	0.7	10.2	96.5	15.4951	23.5525	10.8066	1.77467	3.21753
						2010	4	2	92	22	2.9	12.45	71.5	4.32917	6.61497	3.0272	0.537075	1.22393
						2010	4	3	93	24	7.4	15.7	51.5	10.5431	14.0013	6.87296	1.35038	2.55102
						2010	4	4	94	24	9.1	16.55	56.5	30.3445	36.1706	18.741	3.77562	6.22175
						2010	4	5	95	22.8	0.3	11.55	61.5	8.8049	15.8488	6.68245	1.1503	2.41921
						2010	4	6	96	24.9	-0.5	12.2	62.5	19.082	38.7746	15.3872	2.70738	5.68198
						2010	4	7	97	23.1	6.8	14.95	75	24.5786	32.0505	15.8771	3.04965	5.28295
						2010	4	8	98	19	4	11.5	75.5	34.7229	41.6675	21.517	3.69758	5.88662
						2010	4	9	99	18.6	2.1	10.35	86.5	22.2646	29.3893	14.4703	2.38904	3.98427
						2010	4	10	100	17.7	1.6	9.65	82	28.2526	36.3894	18.1381	2.92013	4.66982
						2010	4	11	101	16.7	5	10.85	55.5	22.6149	21.1675	12.3768	2.0797	3.02618
						2010	4	12	102	21.6	7.9	14.75	74.5	38.1359	41.7969	22.5847	4.31154	6.74531
						2010	4	13	103	17.5	6	11.75	72.5	38.6725	35.5787	20.9832	3.63661	5.12927
						2010	4	14	104	21.5	-0.7	10.4	50	25.9594	46.104	19.57	3.23675	6.11722
						2010	4	15	105	23.6	2.5	13.05	63.5	8.10105	13.6746	5.95391	1.07727	2.27364
						2010	4	16	106	26.3	5.1	15.7	50.5	27.5195	46.673	20.2735	3.98328	7.7306
						2010	4	17	107	25.9	6.9	16.4	69.5	25.515	38.7828	17.7948	3.56932	6.61774
						2010	4	18	108	26.6	7.3	16.95	84	28.7172	44.3393	20.1855	4.11399	7.63577
						2010	4	19	109	25.8	10.5	18.15	70.5	33.297	40.7555	20.8387	4.39377	7.2721
						2010	4	20	110	27.7	7	17.35	94.5	29.4546	48.7768	21.4416	4.42029	8.45709
						2010	4	21	111	23.9	12.4	18.15	68	34.3627	31.6136	18.6447	3.93118	5.72047
						2010	4	22	112	21.2	11.8	16.5	72	45.2969	34.0632	22.2204	4.47007	5.8706
						2010	4	23	113	22.8	5	13.9	77.5	23.7807	33.8638	16.053	2.98457	5.36072
						2010	4	24	114	23.4	3.5	13.45	34.5	21.3471	33.9846	15.2365	2.79256	6.45759
						2010	4	25	115	24.8	5.6	15.2	36.5	7.68021	11.7968	5.38448	1.04214	2.58458
						2010	4	26	116	26.8	5.9	16.35	49.5	29.1931	48.8108	21.3537	4.27693	8.28816
						2010	4	27	117	25.1	11	18.05	76.5	40.6644	45.8694	24.4311	5.1369	8.11973
						2010	4	28	118	21.1	12.3	16.7	66	40.9934	28.8594	19.457	3.93698	5.05441
						2010	4	29	119	22.2	5.9	14.05	66.5	30.1983	39.3785	19.5072	3.64396	6.21742
						2010	4	30	120	22	15.6	18.8	62	48.4104	24.7861	19.5952	4.20628	4.63415
						2010	5	1	121	23.8	13.3	18.55	62	43.44	36.4896	22.5219	4.8015	6.61258
						2010	5	2	122	18.6	8.6	13.6	57.5	34.3838	27.507	17.397	3.20385	4.36298
						2010	5	3	123	18.8	10.6	14.7	58.5	32.0488	21.024	14.6838	2.79892	3.54648
						2010	5	4	124	21.6	10.6	16.1	62.5	46.4416	40.8686	24.6447	4.89994	6.89409
						2010	5	5	125	23.9	8.6	16.25	61	27.5635	33.7377	17.2504	3.44497	5.77543
						2010	5	6	126	24	11.4	17.7	62.5	23.6206	23.8095	13.4151	2.79313	4.34589
						2010	5	7	127	27.1	8.2	17.65	54.5	27.629	41.775	19.2183	3.99576	7.35092
						2010	5	8	128	29.5	11.3	20.4	56.5	29.5723	43.0572	20.1855	4.52243	8.06528
						2010	5	9	129	29.7	11.1	20.4	73.5	36.7947	54.7506	25.39	5.68844	10.1542
						2010	5	10	130	30.8	14.5	22.65	81.5	38.8416	50.6495	25.0906	5.95247	9.83559
						2010	5	11	131	28.9	11.8	20.35	79.5	34.9067	47.7524	23.0955	5.16761	8.89479
						2010	5	12	132	31.9	14.1	23	88	35.9409	51.1798	24.2616	5.8056	9.9951
						2010	5	13	133	33	12.6	22.8	76.5	32.3123	52.7338	23.3509	5.56029	10.2512
						2010	5	14	134	33.6	11.4	22.5	63	34.2738	60.8702	25.838	6.10705	11.7106
						2010	5	15	135	32.5	10.8	21.65	37	34.1692	59.3178	25.4674	5.89251	13.3337
						2010	5	16	136	32.7	11.8	22.25	57	30.378	50.792	22.2204	5.21942	9.79204
						2010	5	17	137	33.3	14.2	23.75	84.5	37.0584	56.6252	25.9133	6.31484	11.1559
						2010	5	18	138	29.4	6.5	17.95	58.5	28.086	51.4536	21.5044	4.50891	9.04229
						2010	5	19	139	27	16.4	21.7	70	49.3754	41.8703	25.7207	5.95866	8.0578
						2010	5	20	140	28.7	8.2	18.45	67	30.7943	50.5026	22.3083	4.74289	8.99263
						2010	5	21	141	28.6	11.1	19.85	57	37.946	53.1244	25.3983	5.60839	9.74927
						2010	5	22	142	28.7	8.9	18.8	56.5	34.5096	54.6633	24.5693	5.27402	9.78574
						2010	5	23	143	28.5	14.7	21.6	39.5	40.5757	44.7956	24.1171	5.57301	9.86441
						2010	5	24	144	26.7	8.4	17.55	53.5	36.4834	53.4117	24.9713	5.17724	9.27671
						2010	5	25	145	28.6	6.7	17.65	39.5	31.8068	55.7256	23.8157	4.95161	11.1421
						2010	5	26	146	31.2	8.1	19.65	47.5	19.307	35.6794	14.8471	3.26108	6.87703
						2010	5	27	147	33.4	9.2	21.3	59	30.3534	58.7641	23.891	5.47873	11.0694
						2010	5	28	148	27.3	15.9	21.6	63.5	44.1314	40.2479	23.8408	5.50915	7.74575
						2010	5	29	149	33.1	12.2	22.65	61	35.1176	58.7166	25.6872	6.09402	11.3401
						2010	5	30	150	33.5	15.8	24.65	57	36.8727	52.2117	24.8205	6.17955	10.4652
						2010	5	31	151	34.7	17.2	25.95	51	37.2986	52.218	24.965	6.40586	10.6686
						2010	6	1	152	37.1	17.2	27.15	63.5	29.3955	46.7976	20.9811	5.53127	9.76187
						2010	6	2	153	37.1	17.7	27.4	58	30.3185	47.0543	21.3663	5.66415	9.84509
						2010	6	3	154	37.1	16.8	26.95	50	33.1556	53.8447	23.9015	6.27316	11.1396
						2010	6	4	155	37.1	13.3	25.2	62	30.5216	58.1131	23.824	6.0083	11.6992
						2010	6	5	156	38	16.6	27.3	34.5	32.6005	55.8121	24.1297	6.38258	14.1497
						2010	6	6	157	37.1	18.6	27.85	44.5	35.081	51.9199	24.1422	6.46378	11.737
						2010	6	7	158	34.8	21.3	28.05	60	46.9213	50.675	27.584	7.41761	10.6578
						2010	6	8	159	31.5	11.5	21.5	70.5	35.7235	57.1576	25.5616	5.89182	10.8188
						2010	6	9	160	33.7	13.4	23.55	72.5	36.626	59.4805	26.4032	6.40325	11.6601
						2010	6	10	161	34.4	13.4	23.9	56.5	37.4494	62.915	27.4583	6.7155	12.381
						2010	6	11	162	35.2	14.1	24.65	66.5	36.1357	60.9971	26.5581	6.61216	12.1584
						2010	6	12	163	37.1	16.2	26.65	66.5	36.5772	61.1571	26.7549	6.97499	12.5454
						2010	6	13	164	37.1	16.5	26.8	55	36.2718	59.7759	26.3404	6.8901	12.2962
						2010	6	14	165	37.1	19	28.05	54	37.3302	54.0542	25.4109	6.83325	11.3403
						2010	6	15	166	37.1	22.3	29.7	44.5	43.7248	51.7702	26.914	7.49791	11.9654
						2010	6	16	167	37.1	15.9	26.5	41	37.3917	63.4163	27.5463	7.15706	14.6343
						2010	6	17	168	37.1	21	29.05	38	42.9789	55.3568	27.5923	7.58169	13.7576
						2010	6	18	169	36.2	16.7	26.45	38.5	37.8616	59.064	26.7507	6.94252	14.0847
						2010	6	19	170	35.9	20.8	28.35	36	42.992	51.9343	26.7298	7.23495	13.143
						2010	6	20	171	37.1	20.6	28.85	39	40.9279	54.0249	26.6	7.27782	13.2435
						2010	6	21	172	37.1	14	25.55	34	33.8935	62.6352	26.0641	6.62673	15.5323
						2010	6	22	173	37.1	15.1	26.1	24	33.0065	58.0915	24.7703	6.37769	16.2479
						2010	6	23	174	36	17.4	26.7	29.5	39.683	59.0483	27.383	7.14675	15.6892
						2010	6	24	175	28.1	16.2	22.15	22.5	41.5785	39.5828	22.9489	5.37709	10.7284
						2010	6	25	176	31.3	11.1	21.2	32	34.2187	55.2974	24.607	5.62848	13.0975
						2010	6	26	177	33.1	15	24.05	27.5	35.7987	51.8364	24.3683	5.98122	13.6051
						2010	6	27	178	36	13.9	24.95	27	32.7063	57.8248	24.6007	6.16811	15.4111
						2010	6	28	179	35.9	16.1	26	24	34.6155	54.831	24.6447	6.3309	15.346
						2010	6	29	180	36	16.7	26.35	27.5	34.65	53.4996	24.3558	6.30668	14.5112
						2010	6	30	181	35.8	15.7	25.75	39	33.2005	53.3864	23.8157	6.08301	12.575
						2010	7	1	182	37.7	19	28.35	34	31.2075	46.6865	21.5924	5.8444	12.1489
						2010	7	2	183	37.7	16.4	27.05	43	30.3465	51.7105	22.4088	5.89453	11.8016
						2010	7	3	184	37.7	17.1	27.4	43.5	24.6425	40.6108	17.8952	4.74399	9.34857
						2010	7	4	185	38.3	17.7	28	36	32.5356	53.6187	23.6272	6.34668	13.4945
						2010	7	5	186	38.8	18.7	28.75	46.5	35.3543	56.8498	25.3607	6.92386	12.6072
						2010	7	6	187	38.6	20.7	29.65	37	36.6847	52.5324	24.8331	6.91091	13.3326
						2010	7	7	188	37.7	19.7	28.7	56	32.0676	46.1774	21.7682	5.93668	9.82688
						2010	7	8	189	38.6	19.1	28.85	18.5	35.343	55.1351	24.9713	6.8322	16.9236
						2010	7	9	190	37.7	19.8	28.75	17	38.299	54.8442	25.9259	7.07818	17.0661
						2010	7	10	191	39	16.4	27.7	25	33.0939	59.8337	25.1722	6.7174	16.9004
						2010	7	11	192	37.7	16.8	27.25	33	34.8085	58.1997	25.4611	6.7273	14.9819
						2010	7	12	193	40.2	17.9	29.05	31.5	31.4039	56.0246	23.7277	6.51979	15.0208
						2010	7	13	194	37.9	17.5	27.7	41	33.1467	54.0954	23.9538	6.39226	12.7516
						2010	7	14	195	37.7	18.4	28.05	64.5	33.4527	51.651	23.5142	6.32321	10.8549
						2010	7	15	196	37.7	19.5	28.6	50	31.5781	45.9777	21.5547	5.8658	9.7745
						2010	7	16	197	37.7	19.4	28.55	26	33.7857	49.4622	23.1248	6.28631	14.0688
						2010	7	17	198	37.8	22.1	29.95	24.5	37.5658	47.1827	23.8157	6.66966	13.8848
						2010	7	18	199	37.7	21.9	29.8	24	36.7555	46.4589	23.376	6.52598	13.7294
						2010	7	19	200	37.7	21.3	29.5	21	37.8022	49.5965	24.4939	6.79498	15.0223
						2010	7	20	201	37.7	20.2	28.95	27.5	36.0694	50.4971	24.1422	6.61953	14.1897
						2010	7	21	202	37.7	20.9	29.3	35.5	36.1811	48.6274	23.7277	6.55458	12.5528
						2010	7	22	203	37.7	21	29.35	36.5	35.1558	46.9682	22.9866	6.3566	12.0054
						2010	7	23	204	37.7	20.3	29	25.5	34.6861	48.283	23.1499	6.35424	13.8944
						2010	7	24	205	37.8	22.5	30.15	24	36.9297	45.202	23.1122	6.49978	13.4262
						2010	7	25	206	37.7	20.7	29.2	30.5	34.9204	47.4917	23.0369	6.35023	12.9828
						2010	7	26	207	37.7	19.6	28.65	25	27.9377	40.4538	19.0174	5.18088	11.748
						2010	7	27	208	37.7	21.2	29.45	30	27.7019	36.5665	18.0041	4.98932	10.208
						2010	7	28	209	39.9	21.9	30.9	27	25.6097	36.8779	17.3844	4.96543	10.8044
						2010	7	29	210	39.6	23	31.3	19.5	24.7923	32.9241	16.1618	4.65414	10.535
						2010	7	30	211	37.7	19.7	28.7	29	31.8641	45.8842	21.63	5.899	12.6974
						2010	7	31	212	39.1	19.4	29.25	26.5	32.0855	50.5667	22.7857	6.28766	14.4126
						2010	8	1	213	37.1	21.4	29.25	30	24.7665	31.1067	15.7012	4.33273	8.74609
						2010	8	2	214	37.1	18.7	27.9	51	29.2189	43.0103	20.0536	5.37499	9.09259
						2010	8	3	215	38.6	19.7	29.15	43.5	28.0804	42.4576	19.5324	5.37846	9.96454
						2010	8	4	216	37.6	23.5	30.55	40	32.0088	36.106	19.2309	5.45336	9.07599
						2010	8	5	217	38.1	24.1	31.1	47.5	34.305	38.4216	20.5372	5.89005	8.77488
						2010	8	6	218	38.7	20.4	29.55	63	31.1063	45.5396	21.2909	5.91265	9.79374
						2010	8	7	219	37.1	21.3	29.2	65.5	31.8574	40.2677	20.2609	5.58502	8.67471
						2010	8	8	220	37.1	18.5	27.8	63	30.818	45.8572	21.2658	5.6874	9.65442
						2010	8	9	221	37.1	17	27.05	52	27.9648	44.9673	20.0599	5.27667	9.38405
						2010	8	10	222	37.4	17.1	27.25	45	29.9002	48.5579	21.5547	5.69514	10.8499
						2010	8	11	223	37.1	18.4	27.75	39	30.7355	45.9803	21.2658	5.68117	11.1932
						2010	8	12	224	37.4	20.2	28.8	46.5	32.5399	44.7749	21.5924	5.90139	10.0304
						2010	8	13	225	39	19	29	70	29.6408	47.4253	21.2092	5.82156	10.1169
						2010	8	14	226	38.9	19.9	29.4	54.5	29.7354	45.1979	20.7382	5.74092	9.7068
						2010	8	15	227	39	19.6	29.3	62.5	29.053	45.0903	20.4744	5.65589	9.67355
						2010	8	16	228	37.1	18.6	27.85	70.5	28.4554	42.114	19.5826	5.24299	8.9063
						2010	8	17	229	37.1	18.4	27.75	62	29.1198	43.5632	20.1478	5.38251	9.1867
						2010	8	18	230	37.1	19.2	28.15	69	27.7965	39.8045	18.8164	5.07095	8.4726
						2010	8	19	231	37.1	16.8	26.95	75	27.4782	44.6246	19.8087	5.19897	9.30338
						2010	8	20	232	37.1	17.4	27.25	91	28.9371	45.6048	20.5498	5.42963	9.53614
						2010	8	21	233	37.1	17.2	27.15	67	28.7737	45.8077	20.5372	5.41427	9.5642
						2010	8	22	234	37.1	18	27.55	67.5	29.7473	45.4539	20.801	5.53261	9.54286
						2010	8	23	235	38	19.4	28.7	55	29.7622	44.2862	20.5372	5.60097	9.44186
						2010	8	24	236	37.1	19.9	28.5	62.5	30.9309	42.5609	20.5247	5.57346	9.06875
						2010	8	25	237	37.1	20	28.55	75	30.5655	41.8137	20.2232	5.49753	8.92237
						2010	8	26	238	37.1	21.5	29.3	73	30.6497	38.2508	19.3691	5.35054	8.27124
						2010	8	27	239	37.1	20.6	28.85	77	28.5845	37.7315	18.5777	5.08291	8.12187
						2010	8	28	240	37.1	19.7	28.4	78.5	27.5531	38.3539	18.3893	4.98282	8.20434
						2010	8	29	241	38.3	18.5	28.4	73.5	26.3057	41.6682	18.7285	5.07472	8.87666
						2010	8	30	242	37.3	18.5	27.9	75	20.6772	31.0985	14.3447	3.84481	6.69108
						2010	8	31	243	37.1	19.4	28.25	71	26.2363	37.1506	17.6608	4.76988	7.94566
						2010	9	1	244	38.3	21.5	29.9	48.5	22.6012	30.376	14.822	4.1466	6.84579
						2010	9	2	245	38.3	20.4	29.35	51.5	26.8316	38.4228	18.1632	5.02276	8.31129
						2010	9	3	246	38.3	17.7	28	54	23.9736	39.5085	17.4095	4.6765	8.3971
						2010	9	4	247	38.3	16.3	27.3	66.5	22.5957	39.7685	16.9573	4.48541	8.37467
						2010	9	5	248	38.3	17.2	27.75	68.5	19.5263	32.9603	14.3509	3.83387	7.05311
						2010	9	6	249	38.9	17.8	28.35	71.5	18.4068	31.0707	13.5282	3.66167	6.72279
						2010	9	7	250	38.3	17.8	28.05	72	20.1307	33.0144	14.5833	3.9216	7.0906
						2010	9	8	251	38.3	18.5	28.4	87	21.9479	34.7654	15.6259	4.23404	7.47638
						2010	9	9	252	38.3	16.5	27.4	88.5	21.0682	36.7429	15.7389	4.17236	7.7794
						2010	9	10	253	38.3	16	27.15	80	17.7052	31.5861	13.3775	3.52672	6.72444
						2010	9	11	254	38.3	16.4	27.35	80.5	21.9427	38.4436	16.4298	4.35069	8.11485
						2010	9	12	255	38.3	17.6	27.95	80	22.7423	37.6613	16.5554	4.44221	8.0192
						2010	9	13	256	35.6	19.3	27.45	58	24.4619	31.8984	15.8017	4.19364	6.81329
						2010	9	14	257	33.2	17.6	25.4	35	25.124	31.3548	15.8771	4.02275	7.91522
						2010	9	15	258	34	15	24.5	30	20.0097	30.4148	13.9553	3.46216	8.03568
						2010	9	16	259	34.5	13.6	24.05	22.5	18.8038	31.4399	13.7543	3.376	8.91651
						2010	9	17	260	35.8	12.5	24.15	19.5	18.98	35.3788	14.6587	3.60658	10.2869
						2010	9	18	261	35.5	14	24.75	16.5	19.4538	33.4606	14.4326	3.60174	10.1459
						2010	9	19	262	35.7	15.1	25.4	30.5	20.6526	34.0355	14.9978	3.79997	9.00229
						2010	9	20	263	38.3	13.8	26.05	34.5	14.1874	27.8072	11.2358	2.88963	7.18382
						2010	9	21	264	38.3	15	26.65	39.5	13.865	25.8444	10.7083	2.79163	6.37208
						2010	9	22	265	36	15.4	25.7	44.5	17.4527	28.762	12.674	3.2335	6.51377
						2010	9	23	266	32.8	20.7	26.75	56.5	16.1142	15.5986	8.96855	2.34336	3.51335
						2010	9	24	267	35.9	18	26.95	76.5	21.8586	31.3016	14.7969	3.88356	6.65006
						2010	9	25	268	34.8	17	25.9	63.5	18.7752	26.7359	12.674	3.24837	5.65876
						2010	9	26	269	30.8	13.5	22.15	62	15.364	21.2638	10.2247	2.39571	4.31653
						2010	9	27	270	33.3	15.8	24.55	58	22.4448	31.4228	15.023	3.73144	6.44877
						2010	9	28	271	35	15.1	25.05	37	20.4144	32.4997	14.5708	3.66185	7.95231
						2010	9	29	272	32.9	14.7	23.8	27.5	18.991	27.6509	12.963	3.16275	7.47317
						2010	9	30	273	33.6	15.3	24.45	44	19.4713	28.5059	13.3272	3.30244	6.38223
						2010	10	1	274	30.6	17.9	24.25	53	8.43725	8.57225	4.81086	1.18647	2.04213
						2010	10	2	275	30.9	17.6	24.25	53.5	21.4945	22.8701	12.5422	3.09319	4.78058
						2010	10	3	276	22.8	17.1	19.95	49	10.8184	4.93319	4.13257	0.914966	1.26053
						2010	10	4	277	29.1	13.5	21.3	54	6.281	7.83869	3.96928	0.91024	1.80604
						2010	10	5	278	30.2	13.6	21.9	75	10.6555	14.1506	6.94623	1.61736	2.988
						2010	10	6	279	27.1	11.1	19.1	80	11.8741	15.1988	7.5994	1.64465	3.00197
						2010	10	7	280	27.8	7.6	17.7	65.5	7.8254	12.6458	5.62733	1.17165	2.47265
						2010	10	8	281	29.2	13.8	21.5	66.5	6.58173	8.10869	4.13257	0.952534	1.86231
						2010	10	9	282	26.8	13	19.9	61	19.5693	21.6045	11.6315	2.57184	4.1883
						2010	10	10	283	25.2	12.6	18.9	66	14.973	15.0927	8.5038	1.8304	2.96973
						2010	10	11	284	22.1	12.5	17.3	71	7.72802	5.93512	3.8311	0.788677	1.33247
						2010	10	12	285	22.1	8.3	15.2	68.5	16.4839	18.1982	9.79758	1.89627	3.1655
						2010	10	13	286	23.3	5.6	14.45	72.5	15.1894	21.5083	10.2247	1.93395	3.58942
						2010	10	14	287	20.7	11.9	16.3	80.5	23.9503	16.861	11.3677	2.2735	3.05941
						2010	10	15	288	21.2	14.9	18.05	76	29.3697	14.8023	11.7948	2.47997	2.85994
						2010	10	16	289	26.9	15.5	21.2	66	20.3916	18.5971	11.016	2.51974	3.75569
						2010	10	17	290	27.7	17.2	22.45	27.5	18.6794	15.6907	9.68453	2.28619	4.36636
						2010	10	18	291	26.9	10.8	18.85	37.5	15.2024	19.5807	9.7599	2.09791	4.40903
						2010	10	19	292	28.5	9.6	19.05	42.5	12.4782	18.867	8.67965	1.87589	4.02414
						2010	10	20	293	30.7	10.5	20.6	84	8.38436	13.5491	6.02928	1.35789	2.80538
						2010	10	21	294	31.3	12.1	21.7	73	13.5807	20.86	9.52124	2.20576	4.20666
						2010	10	22	295	28.5	10.6	19.55	61.5	13.6199	19.5037	9.21977	2.01966	3.7878
						2010	10	23	296	27.8	8.1	17.95	45	12.2399	19.2901	8.69221	1.82253	3.8685
						2010	10	24	297	27.8	10	18.9	53	12.8021	18.2303	8.64197	1.86014	3.51199
						2010	10	25	298	28	9.1	18.55	54.5	13.7603	20.8056	9.57148	2.04057	3.92433
						2010	10	26	299	26.6	9.8	18.2	50.5	15.591	20.9543	10.2247	2.15883	3.91614
						2010	10	27	300	26.9	9.1	18	40	13.7232	19.5419	9.26374	1.94508	4.18029
						2010	10	28	301	26.3	8.1	17.2	44	11.9614	17.4158	8.16465	1.676	3.50682
						2010	10	29	302	26.9	12.2	19.55	46.5	13.4732	15.8445	8.26514	1.81054	3.30323
						2010	10	30	303	22.4	11.7	17.05	95	17.568	15.0382	9.19465	1.87934	2.82469
						2010	10	31	304	18.4	4.5	11.45	58.5	13.9819	15.5478	8.3405	1.43082	2.36694
						2010	11	1	305	19.4	0.2	9.8	46	13.9032	21.3553	9.74734	1.57784	3.03617
						2010	11	2	306	20.4	-1.5	9.45	57	10.7365	18.8103	8.03904	1.28481	2.50419
						2010	11	3	307	20.8	-0.1	10.35	64.5	10.956	18.3184	8.01392	1.3231	2.58305
						2010	11	4	308	21.3	-0.8	10.25	55.5	11.6898	20.6675	8.7927	1.44652	2.86384
						2010	11	5	309	21.9	-0.5	10.7	79	10.0188	17.9537	7.58684	1.26816	2.58697
						2010	11	6	310	23	0.8	11.9	67.5	10.5304	18.702	7.93855	1.38282	2.85136
						2010	11	7	311	24.7	1.6	13.15	75	9.96387	18.4132	7.66221	1.39086	2.96914
						2010	11	8	312	22.6	2.3	12.45	82.5	11.2213	18.2233	8.08928	1.43517	2.85608
						2010	11	9	313	22.4	1.6	12	91	7.33301	12.2021	5.35099	0.935229	1.96914
						2010	11	10	314	21.9	2.3	12.1	70	11.0652	17.3503	7.83806	1.37451	2.69079
						2010	11	11	315	21.7	2.5	12.1	75	11.7891	18.108	8.26514	1.4494	2.79567
						2010	11	12	316	22.1	2.5	12.3	49	12.9804	20.3532	9.19465	1.62319	3.17943
						2010	11	13	317	22.1	2	12.05	68	11.6272	18.6965	8.3405	1.46017	2.87054
						2010	11	14	318	21.8	1.4	11.6	71.5	13.4881	22.0126	9.74734	1.68074	3.25838
						2010	11	15	319	22.7	1.8	12.25	70	10.9903	18.3758	8.03904	1.41683	2.85208
						2010	11	16	320	22.4	1.8	12.1	70.5	11.0355	18.1865	8.01392	1.40535	2.80653
						2010	11	17	321	20.7	1.1	10.9	66	12.4129	19.4635	8.7927	1.48004	2.81194
						2010	11	18	322	21.4	0.9	11.15	63	10.4728	17.1754	7.58684	1.28818	2.5465
						2010	11	19	323	20.6	0.9	10.75	84	11.1786	17.6175	7.93855	1.32928	2.5505
						2010	11	20	324	21.6	0.5	11.05	74	10.4254	17.5981	7.66221	1.29649	2.58893
						2010	11	21	325	20.6	0.1	10.35	71	11.1664	18.3129	8.08928	1.33554	2.58235
						2010	11	22	326	20	-0.3	9.85	56.5	7.42277	12.0546	5.35099	0.867755	1.73805
						2010	11	23	327	17	-0.5	8.25	30.5	11.7103	16.3945	7.83806	1.19752	2.59971
						2010	11	24	328	18.5	-0.4	9.05	33	14.0131	21.1878	9.74734	1.53496	3.37489
						2010	11	25	329	20.5	4.3	12.4	41.5	12.4832	16.1783	8.03904	1.4239	2.8741
						2010	11	26	330	20.5	1.9	11.2	33	11.6136	17.2811	8.01392	1.36305	3.19046
						2010	11	27	331	18.4	1.5	9.95	38.5	13.3678	18.0732	8.7927	1.43104	2.90224
						2010	11	28	332	19.6	0.2	9.9	65.5	10.7657	16.7083	7.58684	1.23256	2.31695
						2010	11	29	333	20.6	1.4	11	36.5	11.7891	18.108	8.26514	1.39608	3.15993
						2010	11	30	334	20.1	0.5	10.3	43	12.9804	20.3532	9.19465	1.51534	3.11571
						2010	12	1	335	19.7	1.2	10.45	34	12.1195	17.9369	8.3405	1.38191	3.13188
						2010	12	2	336	17.8	-0.4	8.7	36.5	14.2801	20.7918	9.74734	1.51496	3.10607
						2010	12	3	337	20.5	1.7	11.1	39	11.5879	17.4282	8.03904	1.36261	2.97763
						2010	12	4	338	12.5	4.5	8.5	59	17.7084	11.3334	8.01392	1.23614	1.50513
						2010	12	5	339	20.5	1.5	11	80.5	12.6074	19.1632	8.7927	1.48519	2.78744
						2010	12	6	340	23	0.8	11.9	68	10.0639	17.8734	7.58684	1.32156	2.73773
						2010	12	7	341	17.9	9.1	13.5	76.5	16.7255	11.7748	7.93855	1.45732	2.03593
						2010	12	8	342	15.8	0	7.9	61	12.0477	15.2283	7.66221	1.15493	1.85208
						2010	12	9	343	15	-2.5	6.25	68	12.0857	16.92	8.08928	1.14102	1.73326
						2010	12	10	344	16.2	-2.6	6.8	75.5	7.71321	11.6007	5.35099	0.772035	1.32385
						2010	12	11	345	15.8	0	7.9	66.5	12.3242	15.5778	7.83806	1.18144	1.88946
						2010	12	12	346	11.9	0	5.95	74.5	17.6601	16.8124	9.74734	1.35774	1.66422
						2010	12	13	347	9	3.6	6.3	71.5	21.6216	9.34052	8.03904	1.13629	1.04807
						2010	12	14	348	7	3.8	5.4	74	27.9995	7.16787	8.01392	1.09044	0.75969
						2010	12	15	349	12	4.3	8.15	77	19.8042	12.1994	8.7927	1.33822	1.55949
						2010	12	16	350	10.1	-1.2	4.45	68	14.1059	12.7518	7.58684	0.990055	1.05266
						2010	12	17	351	15.3	1.1	8.2	32.5	15.25	17.3241	9.19465	1.40209	2.65897
						2010	12	18	352	13.2	4.5	8.85	42	17.6731	12.3005	8.3405	1.30364	1.84454
						2010	12	19	353	12.5	1.1	6.8	20.5	18.0432	16.4554	9.74734	1.40634	2.54903
						2010	12	20	354	12.1	1.4	6.75	37	15.36	13.1482	8.03904	1.15751	1.73828
						2010	12	21	355	10.8	-0.8	5	33	14.706	13.6472	8.01392	1.07164	1.51583
						2010	12	22	356	10.1	-2.3	3.9	36	15.606	15.4811	8.7927	1.11905	1.34879
						2010	12	23	357	10.2	-3.5	3.35	37.5	12.8109	14.0408	7.58684	0.941108	1.07592
						2010	12	24	358	10.9	-4.3	3.3	39.5	12.7262	15.4751	7.93855	0.982408	1.1292
						2010	12	25	359	10.3	-4.2	3.05	40	12.5762	14.5884	7.66221	0.936975	0.998461
						2010	12	26	360	10.7	-5.1	2.8	39	12.7193	16.0771	8.08928	0.977339	1.02512
						2010	12	27	361	12.4	-4.3	4.05	34	8.18381	10.9336	5.35099	0.68573	1.05451
						2010	12	28	362	13.2	-3	5.1	40	12.1711	15.7738	7.83806	1.05272	1.60584
						2010	12	29	363	14.1	-2.9	5.6	36	12.1479	16.5211	8.01392	1.09984	1.88207
						2010	12	30	364	8.8	-3.8	2.5	28.5	15.4816	15.6055	8.7927	1.04685	1.02435
						2010	12	31	365	9	4.3	6.65	37	21.8722	8.22394	7.58684	1.08795	1.16448
																	1138.94	2095.27
																	ETo-HS	ETo-TURC (Ousman Couly (2016)

## Sheet: 2011
	BATMAN					year	month	day	DOY	Tmax	Tmin	Tmean	RHmean.	Ra	Rs=0.16(Tmax-Tmin)^0.5*Ra	Rs=from meteorological station	ETo-HS	ETo-TURC (Ousman Couly (2016)
	DOY	246					#	#		°C	°C	°C	%	MJ m-2 day-1*(0.408 mm day-1)
	φ (-)	36.71	0.64071			2011	1	1	1	9.2	3.5	6.35	57.5	17.5593	8.00706	6.70757	0.950059	0.930963
	tan(φ)		0.745649			2011	1	2	2	9.3	0.2	4.75	64.5	12.7	9.24559	6.12977	0.810697	0.845147
	sin(φ)		0.597765			2011	1	3	3	7.4	-3	2.2	83.5	9.90791	8.24338	5.11233	0.599676	0.409731
	cos(φ)		0.801671			2011	1	4	4	5	0.4	2.7	64	7.68678	2.82874	2.63781	0.31715	0.232598
	dr	0.984766		(1+0.033*cos(2*3.14/365*DOY))		2011	1	5	5	5.8	1.8	3.8	94	26.4174	8.45355	8.45355	1.07093	0.660655
	δ	0.120494		(0.409*sin(2*3.14/365*DOY-1.39))		2011	1	6	6	6.9	1.2	4.05	73	23.0836	10.5261	8.81782	1.13001	0.831473
	tan(δ)	0.121081				2011	1	7	7	7.9	4	5.95	78.5	25.9191	8.08675	8.18977	1.14078	0.895991
	sin(δ)	0.120203				2011	1	8	8	10.5	4	7.25	65.5	13.364	6.94929	5.45147	0.800921	0.91307
	cos(δ)	0.992749				2011	1	9	9	10.8	-0.1	5.35	69.5	15.0282	13.1046	7.93855	1.07785	1.23834
	X	0.991849				2011	1	10	10	10.6	-3.4	3.6	65.5	11.456	12.8307	6.85831	0.860793	0.895243		-
	ωs (eq. 25)	1.49314		(acos{(-1*tan(-0.35)*tan(0.409*sin(2*3.14/365*DOY-1.39))))		2011	1	11	11	9.6	-4.9	2.35	67	15.4626	17.9366	9.42075	1.11334	0.840885
	sin ωs	0.996986				2011	1	12	12	9.7	-6.3	1.7	67	14.0395	17.9706	8.9853	1.02763	0.63305
	sin φ*sin δ	-0.0718532		(sin(0.35)*sin(0.409*sin(2*3.14/365*DOY-1.39)))		2011	1	13	13	8.5	-7	0.75	81.5	14.776	18.3222	9.3077	1.01264	0.301323
	cos φ*cos δ	0.795859		(cos(0.35)*cos(0.409*sin(2*3.14/365*DOY-1.39))		2011	1	14	14	8.3	-5.2	1.55	70	16.9794	18.3378	9.98181	1.13281	0.593084
	Gsc	0.082				2011	1	15	15	9.2	-6	1.6	72	15.2835	18.5848	9.5338	1.08477	0.617753
						2011	1	16	16	11.4	-6.3	2.55	65	5.19999	7.36319	3.50033	0.417774	0.425797
	Ra	25.4105				2011	1	17	17	9.3	-3.4	2.95	49.5	15.3104	15.5554	8.72989	1.06242	0.905402
						2011	1	18	18	10.6	-6.2	2.2	62	16.3188	21.9325	10.702	1.25534	0.952521
						2011	1	19	19	11	-6.7	2.15	95	13.7588	19.4825	9.26164	1.08367	0.838372
						2011	1	20	20	11.3	-6.7	2.3	100	14.3715	20.695	9.75571	1.15007	0.939058
						2011	1	21	21	12	-6.3	2.85	99	14.6447	21.4399	10.0237	1.21399	1.16463
						2011	1	22	22	11.7	-6.6	2.55	68	13.617	19.9353	9.32026	1.1124	0.992082
						2011	1	23	23	11.7	-5.5	3.1	71.5	11.1495	15.3417	7.39843	0.906888	0.925518
						2011	1	24	24	11	-3.8	3.6	79.5	15.856	18.7735	9.7599	1.22497	1.25181
						2011	1	25	25	14.3	3	8.65	77.5	18.1462	16.4042	9.7599	1.51405	2.09692
						2011	1	26	26	9.8	2	5.9	78.5	19.1427	11.9451	8.55404	1.18902	1.22824
						2011	1	27	27	9.4	7.1	8.25	73	41.93	7.71513	10.1744	1.55448	1.07856
						2011	1	28	28	8.1	5	6.55	98.5	17.3004	4.29049	4.87367	0.696022	0.601187
						2011	1	29	29	7.2	4.5	5.85	56	4.56274	0.985552	1.19958	0.16639	0.267507
						2011	1	30	30	9.7	6.7	8.2	97	37.5598	9.01436	10.4089	1.58725	1.21669
						2011	1	31	31	10.4	5	7.7	60.5	29.0202	12.5367	10.7899	1.61371	1.53806
						2011	2	1	32	7.4	0.2	3.8	89.5	26.4488	15.2345	11.3551	1.43852	1.08555
						2011	2	2	33	4.3	-0.9	1.7	99	30.5198	12.6962	11.1353	1.27352	0.466607
						2011	2	3	34	6.5	-6.8	-0.15	99	20.5222	21.8356	11.9748	1.2396	-0.0749185
						2011	2	4	35	3.5	-3	0.25	99	30.3154	15.764	12.3663	1.30914	0.0907335
						2011	2	5	36	5.1	-5.6	-0.25	98.5	23.7441	20.3249	12.427	1.27912	-0.117773
						2011	2	6	37	8.1	-7.1	0.5	96.5	20.66	25.1225	12.8876	1.38322	0.272125
						2011	2	7	38	10.8	-5.3	2.75	76	18.9786	24.4444	12.1842	1.46851	1.2744
						2011	2	8	39	13.7	-5.1	4.3	73.5	12.792	19.2391	8.87435	1.15026	1.47315
						2011	2	9	40	12.8	-5.9	3.45	69	13.0349	19.5002	9.0188	1.12402	1.25153
						2011	2	10	41	12.3	-5	3.65	76	15.9869	22.1259	10.6392	1.33845	1.46918
						2011	2	11	42	8	-7.1	0.45	72	10.3103	12.4548	6.4103	0.686134	0.131327
						2011	2	12	43	8.9	-9.2	-0.15	71	12.8617	18.6237	8.75502	0.906295	-0.0648611
						2011	2	13	44	7.3	-6	0.65	95	14.2938	15.2086	8.3405	0.90252	0.222726
						2011	2	14	45	7.2	2	4.6	99.5	17.0071	7.07494	6.20513	0.815206	0.666796
						2011	2	15	46	6.5	3.5	5	100	49.133	11.7919	13.6161	1.82078	1.07585
						2011	2	16	47	8.7	2.6	5.65	82	9.09087	4.43634	3.59245	0.494084	0.553554
						2011	2	17	48	9.3	-1.3	4	82	5.49776	4.6621	2.86391	0.366171	0.440664
						2011	2	18	49	12	-1.4	5.3	76	8.9002	9.54102	5.21281	0.70624	0.941368
						2011	2	19	50	12.8	-0.3	6.25	59.5	21.2566	22.277	12.3098	1.73633	2.22169
						2011	2	20	51	15.8	8.8	12.3	76.5	34.4795	19.3085	14.5959	2.57671	2.98874
						2011	2	21	52	13	7.1	10.05	81.5	33.6133	15.8655	13.0634	2.13379	2.23315
						2011	2	22	53	12	2.5	7.25	80.5	27.3811	20.8096	13.5031	1.98385	2.31312
						2011	2	23	54	16	5.8	10.9	79	28.6372	23.3679	14.6336	2.4632	3.32133
						2011	2	24	55	16.8	8	12.4	81	12.5177	8.81245	5.94135	1.05235	1.52953
						2011	2	25	56	15.1	4.7	9.9	83	16.075	13.3744	8.29445	1.34752	1.90603
						2011	2	26	57	16	8	12	92	20.2204	12.941	9.15069	1.59933	2.07094
						2011	2	27	58	12	3.2	7.6	85.5	31.3163	22.0467	14.8638	2.21428	2.51619
						2011	2	28	59	12.3	4.6	8.45	87.5	28.3671	17.4742	12.5945	1.939	2.18543
						2011	3	1	60	14.6	0.6	7.6	95	21.4293	24.0008	12.829	1.91114	2.71991
						2011	3	2	61	14.8	-1.7	6.55	68.5	19.7134	26.0217	12.8122	1.82975	2.64877
						2011	3	3	62	12.2	-3.8	4.2	84	21.3341	27.3076	13.6538	1.76175	1.99353
						2011	3	4	63	13.1	-6.3	3.4	86.5	19.0003	29.4885	13.39	1.66489	1.8089
						2011	3	5	64	13.9	-6	3.95	87	21.7694	34.657	15.538	1.98208	2.37449
						2011	3	6	65	16.7	-5.8	5.45	42	18.8345	33.9022	14.2944	1.9492	3.31337
						2011	3	7	66	11.6	6.7	9.15	53	41.5656	16.2937	14.7215	2.3269	2.15923
						2011	3	8	67	15.1	9	12.05	63.5	36.6654	17.8927	14.4891	2.53661	2.75954
						2011	3	9	68	16.5	7.3	11.9	60.5	29.584	21.7738	14.3572	2.50089	3.27262
						2011	3	10	69	10.6	3.7	7.15	49	18.1114	9.9975	7.61197	1.11387	1.22685
						2011	3	11	70	9.1	2.6	5.85	62	16.3817	8.51849	6.68245	0.926905	0.92271
						2011	3	12	71	11.3	-0.7	5.3	56	28.0112	26.8908	15.5254	2.1034	2.34559
						2011	3	13	72	13.1	-3.3	4.9	93.5	21.4019	28.0792	13.8673	1.84624	2.30287
						2011	3	14	73	14.4	0.1	7.25	89.5	16.9197	19.3562	10.2372	1.50403	2.16631
						2011	3	15	74	16.2	-3	6.6	64.5	6.87994	10.5676	4.82342	0.690261	1.19896
						2011	3	16	75	16.6	-3.7	6.45	49.5	24.2895	39.4462	17.51	2.49039	3.89953
						2011	3	17	76	19.9	-1.7	9.1	35.5	22.4324	38.7632	16.681	2.63174	5.77259
						2011	3	18	77	22.8	2.2	12.5	58.5	20.2894	33.4369	14.7341	2.61838	5.00606
						2011	3	19	78	21.6	6.1	13.85	79.5	22.3335	27.6935	14.0683	2.61146	4.43243
						2011	3	20	79	20.2	3	11.6	88	23.6619	32.5588	15.7012	2.70738	4.6841
						2011	3	21	80	23.5	11.2	17.35	68.5	26.4587	26.0354	14.8471	3.0608	4.67612
						2011	3	22	81	15.9	7.9	11.9	58	24.3838	15.6056	11.0348	1.92216	2.42673
						2011	3	23	82	14.4	4.9	9.65	60	23.7388	18.0415	11.7069	1.88474	2.44314
						2011	3	24	83	17.1	1.6	9.35	79.5	21.8051	27.0383	13.7355	2.18716	3.46728
						2011	3	25	84	16.3	0.2	8.25	67.5	25.7873	33.2141	16.5554	2.52939	3.88345
						2011	3	26	85	19.6	-0.7	9.45	56.5	22.4425	36.4467	16.1786	2.58568	4.61731
						2011	3	27	86	21.6	-0.5	10.55	48	24.632	43.5494	18.5275	3.08061	6.00894
						2011	3	28	87	21.7	1.9	11.8	73	22.8653	36.2186	16.2791	2.82611	5.22884
						2011	3	29	88	20.5	1.2	10.85	56.5	19.3086	29.8124	13.5722	2.28056	4.15102
						2011	3	30	89	22.4	1.6	12	51	15.2169	25.3208	11.1039	1.94071	3.7766
						2011	3	31	90	22.6	2.5	12.55	66	11.347	18.246	8.13953	1.44886	2.87177
						2011	4	1	91	26.4	5.6	16	96.5	14.3045	23.8027	10.4382	2.06924	4.14284
						2011	4	2	92	25.3	14.1	19.7	71.5	29.6981	26.6095	15.9022	3.4975	5.05095
						2011	4	3	93	21.2	12.5	16.85	51.5	33.1637	23.0819	15.651	3.18063	4.12827
						2011	4	4	94	18	9.6	13.8	56.5	39.5474	26.5758	18.3391	3.39885	4.25807
						2011	4	5	95	17.4	9.5	13.45	61.5	36.171	22.8601	16.2665	2.98134	3.65657
						2011	4	6	96	18	6.2	12.1	62.5	25.9394	24.4867	14.2567	2.50011	3.67857
						2011	4	7	97	18.7	9.9	14.3	75	17.9164	12.6132	8.5038	1.60098	2.22454
						2011	4	8	98	16.6	9	12.8	75.5	34.4289	20.9328	15.1862	2.72546	3.28613
						2011	4	9	99	17.9	8.4	13.15	86.5	33.0611	25.1264	16.3042	2.95956	3.94131
						2011	4	10	100	15.3	11.5	13.4	82	54.2878	16.5035	16.9322	3.09839	2.71963
						2011	4	11	101	15.6	8.9	12.25	55.5	30.9059	16.5655	12.7997	2.25585	2.5998
						2011	4	12	102	15.8	5.9	10.85	74.5	35.7048	28.2782	17.9748	3.02034	3.95139
						2011	4	13	103	12.6	3	7.8	72.5	32.7111	25.1221	16.2163	2.43477	2.88592
						2011	4	14	104	16.1	-0.3	7.9	50	28.1287	36.9049	18.226	2.74722	4.17024
						2011	4	15	105	20.7	3.4	12.05	63.5	24.3296	33.6721	16.1911	2.83459	4.93861
						2011	4	16	106	22.8	6.6	14.7	50.5	27.3851	35.491	17.6356	3.36157	5.76622
						2011	4	17	107	26	12.4	19.2	69.5	26.0352	28.3263	15.3621	3.33365	5.29351
						2011	4	18	108	27.2	9.5	18.35	84	30.2296	42.8051	20.3488	4.31435	7.65775
						2011	4	19	109	28.3	16.7	22.5	70.5	31.3483	29.0912	17.083	4.03772	5.79971
						2011	4	20	110	23.6	14.3	18.95	94.5	41.2149	30.6639	20.1102	4.33452	5.66753
						2011	4	21	111	23.1	5.4	14.25	68	28.998	41.0612	19.5198	3.6692	6.51694
						2011	4	22	112	16.3	11	13.65	72	49.3441	20.9219	18.1758	3.3526	3.39877
						2011	4	23	113	17.2	8.5	12.85	77.5	36.3044	25.2678	17.1332	3.0799	3.91311
						2011	4	24	114	19.6	5.1	12.35	34.5	26.7605	31.0422	16.3042	2.88306	5.66487
						2011	4	25	115	19.3	5.5	12.4	36.5	28.2551	31.1936	16.7941	2.97461	5.56995
						2011	4	26	116	17.7	6.7	12.2	49.5	27.2211	23.9546	14.4451	2.54162	3.64721
						2011	4	27	117	21.5	5.2	13.35	76.5	26.2898	34.2819	16.9825	3.10261	5.30953
						2011	4	28	118	23.6	7.7	15.65	66	30.4379	38.7171	19.4193	3.80976	6.45923
						2011	4	29	119	20.9	13.5	17.2	66.5	44.9775	26.6267	19.5763	4.01853	4.7552
						2011	4	30	120	19.7	12.1	15.9	62	44.3105	26.9408	19.5449	3.86306	4.63084
						2011	5	1	121	18.4	12.2	15.3	62	42.091	20.8772	16.7689	3.25538	3.59516
						2011	5	2	122	19.6	11.4	15.5	57.5	41.3427	27.1208	18.942	3.69946	4.6019
						2011	5	3	123	20.3	9.5	14.9	58.5	37.4575	32.3633	19.6956	3.77734	5.32239
						2011	5	4	124	25	9	17	62.5	33.846	43.3229	21.6614	4.42114	7.47894
						2011	5	5	125	25.2	15.8	20.5	61	39.3307	29.5767	19.2937	4.33393	5.66878
						2011	5	6	126	24.4	8	16.2	62.5	33.0721	43.3906	21.4291	4.27317	7.32062
						2011	5	7	127	21.2	8.2	14.7	54.5	34.2827	35.654	19.7773	3.7698	5.79123
						2011	5	8	128	22.1	6.5	14.3	56.5	25.8263	32.2312	16.3209	3.07268	5.1927
						2011	5	9	129	23.5	7.5	15.5	73.5	19.3518	24.7703	12.3851	2.41887	4.2316
						2011	5	10	130	24.9	7.7	16.3	81.5	23.4348	32.2462	15.5505	3.11005	5.54316
						2011	5	11	131	27.6	10.7	19.15	79.5	29.3709	39.7095	19.3188	4.18661	7.26625
						2011	5	12	132	26	9	17.5	88	24.1879	32.8955	15.9567	3.30358	5.83989
						2011	5	13	133	21.8	8.9	15.35	76.5	34.5793	35.6858	19.8715	3.86351	5.92277
						2011	5	14	134	21.3	8.9	15.1	63	32.7726	32.5104	18.4647	3.56292	5.38088
						2011	5	15	135	20	9.9	14.95	37	37.8939	30.6182	19.2686	3.70108	6.00127
						2011	5	16	136	23.5	7.2	15.35	57	20.0285	26.1171	12.9378	2.51543	4.42252
						2011	5	17	137	25.5	6.2	15.85	84.5	28.0917	43.3736	19.7459	3.89699	7.24102
						2011	5	18	138	28.7	9.7	19.2	58.5	31.8787	48.4556	22.233	4.82467	8.79671
						2011	5	19	139	27.1	15.5	21.3	70	28.2596	26.2249	15.3998	3.5315	5.1505
						2011	5	20	140	25.1	11	18.05	67	36.3889	41.0467	21.8624	4.5968	7.30321
						2011	5	21	141	26.1	15.1	20.6	57	32.5233	28.6205	17.2588	3.88696	5.50891
						2011	5	22	142	25.5	7.9	16.7	56.5	31.2947	44.0629	21.0062	4.25044	7.53734
						2011	5	23	143	26.6	10.3	18.45	39.5	29.6343	38.6432	19.143	4.06991	8.00955
						2011	5	24	144	27.7	9.2	18.45	53.5	29.7696	44.0589	20.487	4.35566	7.89085
						2011	5	25	145	30	9.8	19.9	39.5	28.6466	46.2928	20.6	4.55489	9.83509
						2011	5	26	146	30.4	10.7	20.55	47.5	30.5997	48.2251	21.7305	4.88769	9.3384
						2011	5	27	147	30.5	10.7	20.6	59	27.0643	42.8699	19.2686	4.33959	8.06499
						2011	5	28	148	27.8	14.9	21.35	63.5	37.9308	39.1446	21.7975	5.00503	7.50788
						2011	5	29	149	26	14.9	20.45	61	41.6134	36.9527	22.1827	4.97639	6.98198
						2011	5	30	150	32	16.3	24.15	57	34.2174	42.977	21.6928	5.33724	8.61799
						2011	5	31	151	32.5	12.8	22.65	51	29.8214	46.9986	21.1778	5.02422	9.15473
						2011	6	1	152	31.4	13	22.2	63.5	31.406	46.2296	21.5547	5.05673	8.93913
						2011	6	2	153	30.8	16.5	23.65	58	35.9155	41.0874	21.7305	5.28278	8.19029
						2011	6	3	154	32	12	22	50	29.7549	47.6079	21.2909	4.96987	9.16053
						2011	6	4	155	32.2	12.6	22.4	62	26.1735	41.0401	18.54	4.37124	8.0079
						2011	6	5	156	32.6	11.5	22.05	34.5	29.6697	50.0824	21.8059	5.09648	11.7569
						2011	6	6	157	33.1	14.7	23.9	44.5	30.0151	44.1822	20.6	5.03816	9.50558
						2011	6	7	158	34.4	13.2	23.8	60	28.6789	48.6394	21.1276	5.1548	9.64643
						2011	6	8	159	35.7	13.5	24.6	70.5	28.592	50.7794	21.5547	5.36013	10.1814
						2011	6	9	160	34.8	14	24.4	72.5	30.0378	49.9829	21.9189	5.425	9.99694
						2011	6	10	161	35.4	9.9	22.65	56.5	25.8461	52.7261	20.8827	4.95419	10.2229
						2011	6	11	162	32.6	12.9	22.75	66.5	28.7071	45.2424	20.3865	4.84844	8.8427
						2011	6	12	163	30.8	10.9	20.85	66.5	26.2571	41.8013	18.741	4.24825	7.91329
						2011	6	13	164	31.4	11.7	21.55	55	30.7766	48.5039	21.8561	5.04413	9.2474
						2011	6	14	165	31.1	11.9	21.5	54	30.5656	46.9487	21.4291	4.93928	8.95461
						2011	6	15	166	32.1	10.5	21.3	44.5	24.6621	42.6161	18.3391	4.20554	8.77103
						2011	6	16	167	35.2	12.5	23.85	41	28.4402	51.6473	21.6803	5.296	11.5416
						2011	6	17	168	36.3	14.1	25.2	38	29.2918	52.0223	22.0822	5.56903	12.3182
						2011	6	18	169	36.3	11.3	23.8	38.5	25.9385	51.8769	20.7508	5.06286	11.948
						2011	6	19	170	35.7	14.1	24.9	36	30.6503	52.9637	22.7919	5.70791	12.7807
						2011	6	20	171	35.7	15.8	25.75	39	29.3544	46.7323	20.9517	5.35151	11.0667
						2011	6	21	172	36.3	14.8	25.55	34	30.2389	52.011	22.4339	5.70378	12.9828
						2011	6	22	173	36.4	17.7	27.05	24	29.8459	44.6495	20.6503	5.43196	12.7826
						2011	6	23	174	36.3	19	27.65	29.5	32.6911	45.2444	21.7557	5.79928	12.2989
						2011	6	24	175	35.6	19.1	27.35	22.5	33.5515	44.288	21.8059	5.7743	12.9325
						2011	6	25	176	36.3	13.5	24.9	32	27.6872	50.5014	21.1527	5.29739	12.7905
						2011	6	26	177	36.3	15.1	25.7	27.5	28.2356	47.8875	20.801	5.30691	12.9276
						2011	6	27	178	36.3	20.2	28.25	27	31.8527	41.0262	20.4493	5.52302	11.599
						2011	6	28	179	36.3	16.6	26.45	24	27.5574	43.4305	19.57	5.07894	12.3493
						2011	6	29	180	36.3	14.1	25.2	27.5	24.8264	44.0917	18.7159	4.72005	11.8591
						2011	6	30	181	34.9	16.3	25.6	39	29.744	44.2591	20.5247	5.22437	10.4834
						2011	7	1	182	36.5	13.6	25.05	34	27.9548	51.2132	21.4039	5.37914	12.6976
						2011	7	2	183	36.5	13.7	25.1	43	26.3061	47.9824	20.0976	5.05673	10.6876
						2011	7	3	184	36.5	18.4	27.45	43.5	31.1485	45.1031	21.203	5.62708	10.3387
						2011	7	4	185	36.7	15.3	26	36	27.8318	47.648	20.6	5.29188	11.7333
						2011	7	5	186	36.5	16.2	26.35	46.5	29.6911	48.2183	21.4039	5.54233	10.4351
						2011	7	6	187	37.4	15.8	26.6	37	27.804	48.0453	20.6754	5.384	11.7835
						2011	7	7	188	37.9	18	27.95	56	26.6443	42.4177	19.0174	5.10281	8.97873
						2011	7	8	189	36.5	17.4	26.95	18.5	29.424	44.9598	20.5749	5.40007	13.5867
						2011	7	9	190	37.8	16.2	27	17	28.3107	48.921	21.0522	5.53152	14.9582
						2011	7	10	191	37.3	18.6	27.95	25	30.8807	46.1976	21.3663	5.73308	13.2203
						2011	7	11	192	36.7	21.5	29.1	33	32.772	39.8508	20.443	5.62323	10.6629
						2011	7	12	193	36.5	23.8	30.15	31.5	35.4453	36.0124	20.2106	5.68378	9.97215
						2011	7	13	194	37.6	18.3	27.95	41	29.5749	45.6637	20.7885	5.57804	10.8722
						2011	7	14	195	36.8	17.8	27.3	64.5	28.0244	42.5972	19.5449	5.16986	8.9406
						2011	7	15	196	36.6	18.9	27.75	50	28.3822	40.1893	19.1053	5.10399	8.50777
						2011	7	16	197	36.9	17.5	27.2	26	27.8053	43.1539	19.5952	5.17165	12.1397
						2011	7	17	198	36.7	22.2	29.45	24.5	31.3787	36.3993	19.1178	5.29796	10.785
						2011	7	18	199	36.5	21.6	29.05	24	31.6868	37.7707	19.57	5.37736	11.1758
						2011	7	19	200	36.5	23	29.75	21	33.8128	36.5178	19.8778	5.54353	11.253
						2011	7	20	201	37.1	19.9	28.5	27.5	26.6402	36.6569	17.6775	4.80032	10.3991
						2011	7	21	202	36.5	18.5	27.5	35.5	28.7985	41.4699	19.5491	5.19389	10.5475
						2011	7	22	203	37	18.9	27.95	36.5	29.2294	42.3242	19.8966	5.33874	10.6879
						2011	7	23	204	37.7	20.3	29	25.5	27.8731	38.7993	18.6028	5.10615	11.2785
						2011	7	24	205	36.5	19.7	28.1	24	29.8796	40.1581	19.5952	5.27509	11.7104
						2011	7	25	206	37.6	21.6	29.6	30.5	29.0866	37.2308	18.6154	5.1751	10.3435
						2011	7	26	207	36.5	20.1	28.3	25	29.0301	38.0875	18.8101	5.08581	11.0476
						2011	7	27	208	36.5	17	26.75	30	27.485	42.8767	19.4193	5.07399	11.4832
						2011	7	28	209	36.5	21.4	28.95	27	30.6075	36.9739	19.0299	5.21779	10.5977
						2011	7	29	210	37.4	31.7	34.55	19.5	50.6393	23.0915	19.3439	5.93922	7.81476
						2011	7	30	211	36.5	33.1	34.8	29	60.8411	16.5488	17.9497	5.53745	5.24895
						2011	7	31	212	36.5	19.6	28.05	26.5	28.2633	38.212	18.5903	4.99912	10.8733
						2011	8	1	213	38.6	18.6	28.6	30	25.3136	40.5018	18.113	4.92919	11.1356
						2011	8	2	214	38.6	22.3	30.45	51	30.4316	39.6828	19.658	5.56293	8.67578
						2011	8	3	215	38.6	22.5	30.55	43.5	28.233	36.3642	18.1255	5.1399	8.73758
						2011	8	4	216	38.6	18.4	28.5	40	26.6029	42.9902	19.1304	5.19485	10.4639
						2011	8	5	217	38.6	20.1	29.35	47.5	25.7267	38.0755	17.7047	4.89597	8.53432
						2011	8	6	218	38.6	19.2	28.9	63	25.408	39.4332	17.9057	4.90429	8.47395
						2011	8	7	219	38.6	21.1	29.85	65.5	27.3241	38.2538	18.2888	5.11113	8.32378
						2011	8	8	220	38.6	19.5	29.05	63	24.5829	37.5626	17.1897	4.72331	8.1065
						2011	8	9	221	38.6	19.6	29.1	52	24.2302	36.8299	16.8987	4.64831	7.96138
						2011	8	10	222	38.6	21.8	30.2	45	26.6681	35.842	17.4891	4.92353	8.41781
						2011	8	11	223	38.6	22	30.3	39	27.2747	36.2208	17.7801	5.01588	9.19209
						2011	8	12	224	38.6	23.3	30.95	46.5	27.6772	33.8769	17.3216	4.95258	7.88551
						2011	8	13	225	38.6	17.9	28.25	70	24.4851	40.5473	17.8241	4.81398	8.63343
						2011	8	14	226	38.6	17.8	28.2	54.5	24.2311	40.3205	17.6817	4.77035	8.58223
						2011	8	15	227	38.6	18.8	28.7	62.5	24.9295	39.4883	17.7487	4.84047	8.46505
						2011	8	16	228	38.6	18.5	28.55	70.5	24.0861	38.7305	17.2777	4.69681	8.29579
						2011	8	17	229	38.6	18.1	28.35	62	24.8296	40.7206	17.9874	4.86863	8.67915
						2011	8	18	230	38.6	16.6	27.6	69	21.3321	37.5444	16.009	4.26273	7.96038
						2011	8	19	231	38.6	16.7	27.65	75	21.2633	37.2533	15.9211	4.24399	7.90693
						2011	8	20	232	38.6	25	31.8	91	25.9359	28.2182	15.3035	4.45185	6.38416
						2011	8	21	233	38.6	18.7	28.65	67	22.8371	36.3567	16.3	4.44059	7.82277
						2011	8	22	234	38.6	17.3	27.95	67.5	25.0053	42.609	18.4647	4.95451	9.01733
						2011	8	23	235	38.6	16.1	27.35	55	18.0567	32.502	13.7041	3.6289	6.92535
						2011	8	24	236	38.6	14.3	26.45	62.5	12.1753	23.6687	9.60288	2.4922	5.0955
						2011	8	25	237	38.6	16.7	27.65	75	10.127	17.7424	7.58266	2.02127	3.98579
						2011	8	26	238	38.6	14.8	26.7	73	17.2589	32.8609	13.4717	3.51601	6.93738
						2011	8	27	239	38.6	15.9	27.25	77	15.5273	28.1976	11.8366	3.12746	6.05572
						2011	8	28	240	38.6	14.7	26.65	78.5	16.2191	31.0109	12.6866	3.30739	6.56574
						2011	8	29	241	38.6	22.5	30.55	73.5	18.1177	23.3356	11.6315	3.29837	5.28634
						2011	8	30	242	38.6	14.4	26.5	75	16.8949	32.7085	13.2979	3.45506	6.88843
						2011	8	31	243	38.6	15.3	26.95	71	17.4675	32.5594	13.4905	3.5407	6.90056
						2011	9	1	244	38	16.1	27.05	48.5	18.7217	32.8005	14.0181	3.68739	7.10687
						2011	9	2	245	38	16.4	27.2	51.5	19.6734	33.9956	14.6294	3.86106	7.21028
						2011	9	3	246	36.1	17.2	26.65	54	20.4611	30.9372	14.2325	3.71039	6.55112
						2011	9	4	247	35.7	16.6	26.15	66.5	21.2327	32.4436	14.8471	3.82709	6.80307
						2011	9	5	248	35.7	15.3	25.5	68.5	20.4668	33.4018	14.7906	3.75613	6.92748
						2011	9	6	249	35.1	12.8	23.95	71.5	18.071	32.2386	13.6538	3.34332	6.54359
						2011	9	7	250	35.3	11.3	23.3	72	17.6836	33.9525	13.8611	3.34123	6.79726
						2011	9	8	251	38	11.9	24.95	87	17.3799	36.2892	14.2065	3.56198	7.43038
						2011	9	9	252	35.4	17	26.2	88.5	18.9241	27.8563	12.9881	3.3517	5.90349
						2011	9	10	253	35.2	15.3	25.25	80	20.344	32.3876	14.5205	3.66626	6.70493
						2011	9	11	254	35.2	13.5	24.35	80.5	17.527	30.4269	13.0634	3.22941	6.2377
						2011	9	12	255	35.1	13.3	24.2	80	16.0407	27.975	11.9832	2.95182	5.75378
						2011	9	13	256	36.4	12.7	24.55	58	17.3517	32.8988	13.5156	3.35705	6.73281
						2011	9	14	257	37.1	13.7	25.4	35	17.9819	33.6622	13.9176	3.52627	8.4613
						2011	9	15	258	36.5	16	26.25	30	17.0097	27.8959	12.3223	3.18352	7.60551
						2011	9	16	259	35.6	14.9	25.25	22.5	17.8361	29.5366	12.9839	3.27828	8.56674
						2011	9	17	260	35.9	12.3	24.1	19.5	15.9017	30.0224	12.36	3.0374	8.80933
						2011	9	18	261	38	12.8	25.4	16.5	16.5146	33.2934	13.2644	3.36078	10.1966
						2011	9	19	262	36.4	14.6	25.5	30.5	16.2257	28.2976	12.1214	3.07828	7.58348
						2011	9	20	263	34	17.5	25.75	34.5	19.4042	25.6136	12.6112	3.22117	6.62849
						2011	9	21	264	33	12.3	22.65	39.5	16.3234	27.0315	11.8827	2.81904	6.24564
						2011	9	22	265	34.6	12.6	23.6	44.5	15.658	27.5581	11.7508	2.85323	6.06083
						2011	9	23	266	29.9	14.8	22.35	56.5	15.5092	18.7351	9.64266	2.27065	3.86309
						2011	9	24	267	30.6	15.6	23.1	76.5	20.0979	24.1175	12.4542	2.9875	4.92577
						2011	9	25	268	29.5	16.8	23.15	63.5	11.1909	11.37	6.38099	1.53253	2.53199
						2011	9	26	269	29.1	16.4	22.75	62	21.0124	21.3486	11.9811	2.84941	4.37882
						2011	9	27	270	28.9	12.1	20.5	58	12.6605	17.0157	8.30282	1.86506	3.42019
						2011	9	28	271	30.2	10.1	20.15	37	3.04688	4.89938	2.18561	0.486467	1.47275
						2011	9	29	272	30.9	9.1	20	27.5	13.9726	24.3682	10.4382	2.31412	6.19338
						2011	9	30	273	21.6	14.9	18.25	44	16.378	8.7786	6.78294	1.43414	2.00781
						2011	10	1	274	23.8	9.4	16.6	53	17.316	19.9481	10.5136	2.12117	3.58886
						2011	10	2	275	24	6.7	15.35	53.5	20.7811	28.761	13.8297	2.68883	4.83706
						2011	10	3	276	25.1	5.4	15.25	49	17.8056	28.0616	12.6447	2.45103	4.77944
						2011	10	4	277	24.7	5.2	14.95	54	18.516	28.8849	13.0823	2.51283	4.79309
						2011	10	5	278	26.8	4	15.4	75	14.1067	25.7305	10.7773	2.09854	4.36892
						2011	10	6	279	28.9	4.7	16.8	80	13.4159	25.9732	10.5596	2.14285	4.59601
						2011	10	7	280	28.8	6.3	17.55	65.5	14.2666	25.6799	10.8276	2.24486	4.64153
						2011	10	8	281	29.2	7.1	18.15	66.5	13.3931	23.6791	10.0739	2.12405	4.37375
						2011	10	9	282	28.9	11	19.95	61	19.9288	28.5381	13.4905	2.98685	5.41973
						2011	10	10	283	29.7	11.3	20.5	66	14.9404	21.9923	10.254	2.30334	4.31107
						2011	10	11	284	31.9	11.1	21.5	71	13.3061	22.1414	9.70965	2.23802	4.42472
						2011	10	12	285	32.9	15.1	24	68.5	11.3135	16.1105	7.63709	1.87229	3.47209
						2011	10	13	286	26.3	15.1	20.7	72.5	21.8865	19.6103	11.7194	2.64627	3.90059
						2011	10	14	287	25.7	9.5	17.6	80.5	16.7613	21.7227	10.7941	2.24108	3.98534
						2011	10	15	288	26.8	11.9	19.35	76	11.3283	13.5034	6.99648	1.52443	2.72305
						2011	10	16	289	29.4	13.5	21.45	66	6.5496	8.33109	4.17863	0.961925	1.9011
						2011	10	17	290	28.3	13	20.65	27.5	8.48983	10.3915	5.3133	1.1982	2.96165
						2011	10	18	291	24.9	8.5	16.7	37.5	17.1564	22.5092	11.1165	2.24934	4.73473
						2011	10	19	292	19.2	10.1	14.65	42.5	25.2915	18.4122	12.2072	2.32326	3.4768
						2011	10	20	293	18.1	4.1	11.1	84	16.4776	18.4549	9.86457	1.67203	2.70862
						2011	10	21	294	20.5	1.9	11.2	73	13.3429	19.8543	9.20721	1.56601	2.90804
						2011	10	22	295	23.9	2.9	13.4	61.5	11.7008	19.6573	8.57916	1.56988	3.18093
						2011	10	23	296	24.6	4.4	14.5	45	12.1195	19.5851	8.71524	1.65101	3.5386
						2011	10	24	297	24.4	4.5	14.45	53	10.1016	16.0817	7.21001	1.36375	2.76402
						2011	10	25	298	22.1	9.7	15.9	54.5	15.4053	15.2821	8.67965	1.71554	2.7711
						2011	10	26	299	22.4	6.5	14.45	50.5	13.5258	17.2048	8.62941	1.63222	2.93484
						2011	10	27	300	15.7	8.6	12.15	40	10.6361	6.0413	4.53452	0.796519	1.2892
						2011	10	28	301	18.2	2.1	10.15	44	10.5262	13.5578	6.75782	1.10779	2.12549
						2011	10	29	302	19.2	11.7	15.45	46.5	12.4986	7.49914	5.4766	1.068	1.5837
						2011	10	30	303	20	8.4	14.2	95	10.411	9.66143	5.67338	1.06478	1.77157
						2011	10	31	304	16.9	4.2	10.55	58.5	15.729	15.9806	8.96855	1.49123	2.31311
						2011	11	1	305	18.2	2.2	10.2	46	12.2273	15.651	7.8255	1.2851	2.35328
						2011	11	2	306	19.1	1.1	10.1	57	12.5458	18.0659	8.51636	1.39356	2.51427
						2011	11	3	307	12.4	3.3	7.85	64.5	18.3386	13.3505	8.85132	1.33157	1.6444
						2011	11	4	308	14.1	8.4	11.25	55.5	24.9908	11.3958	9.54636	1.62649	1.79169
						2011	11	5	309	15.3	7	11.15	79	16.6224	11.0373	7.66221	1.30098	1.73516
						2011	11	6	310	15.3	6.6	10.95	67.5	17.7352	12.3437	8.36981	1.41131	1.88806
						2011	11	7	311	15	0.7	7.85	75	14.0686	16.0945	8.51217	1.28055	1.93663
						2011	11	8	312	13.7	1.9	7.8	82.5	14.558	13.7428	8.00136	1.20136	1.67911
						2011	11	9	313	14	-4	5	91	10.8989	15.6944	7.39843	0.989333	1.37829
						2011	11	10	314	15.1	-1.6	6.75	70	9.10593	12.1655	5.95391	0.857279	1.37148
						2011	11	11	315	11.8	2.1	6.95	75	14.3931	11.169	7.17233	1.04113	1.30144
						2011	11	12	316	10.3	4.7	7.5	49	18.5006	8.28825	7.00485	1.03941	1.08774
						2011	11	13	317	11.5	-5.7	2.9	68	9.53418	13.119	6.32656	0.768079	0.76385
						2011	11	14	318	7.9	-1.3	3.3	71.5	7.6009	5.59426	3.68875	0.456488	0.429563
						2011	11	15	319	13.1	2.3	7.7	70	9.73862	8.41417	5.1207	0.765839	1.10456
						2011	11	16	320	17.4	-0.6	8.4	70.5	11.1888	16.1119	7.59522	1.1671	2.02554
						2011	11	17	321	15.4	3.2	9.3	66	14.0552	13.7178	7.85481	1.24846	1.87547
						2011	11	18	322	10.8	8.2	9.5	63	26.5185	5.51584	6.84156	1.09543	0.914253
						2011	11	19	323	11.7	6.5	9.1	84	17.6268	7.33273	6.43123	1.01465	1.10297
						2011	11	20	324	14.4	4.4	9.4	74	5.61892	4.49514	2.84297	0.453534	0.786438
						2011	11	21	325	14.7	1	7.85	71	6.5504	7.17924	3.87926	0.583585	0.987164
						2011	11	22	326	13.2	-0.3	6.45	56.5	5.28826	5.71132	3.10885	0.44216	0.727214
						2011	11	23	327	11.3	-2.2	4.55	30.5	9.92839	10.7227	5.83668	0.765088	1.18193
						2011	11	24	328	12.3	-4.4	3.95	33	9.14435	12.2169	5.97904	0.762708	1.14899
						2011	11	25	329	10.6	-1.3	4.65	41.5	7.70732	7.33737	4.25399	0.56012	0.775558
						2011	11	26	330	8.9	-7.6	0.65	33	6.336	8.36352	4.11791	0.445596	0.16728
						2011	11	27	331	10.1	-7.4	1.35	38.5	9.058	12.6812	6.06278	0.680939	0.440203
						2011	11	28	332	10	-6.2	1.9	65.5	8.86179	11.4849	5.70688	0.659376	0.473113
						2011	11	29	333	9.8	-6.9	1.45	36.5	4.91797	6.57041	3.21562	0.363047	0.282287
						2011	11	30	334	12.6	-7.1	2.75	43	7.00433	11.0388	4.97416	0.599514	0.693608
						2011	12	1	335	11.8	-8	1.9	34	7.10718	11.2578	5.05999	0.584634	0.571528
						2011	12	2	336	8.9	-8.1	0.4	36.5	8.69519	11.8255	5.73619	0.612298	0.133656
						2011	12	3	337	9.3	-8.3	0.5	39	8.12776	11.4439	5.45566	0.585553	0.156606
						2011	12	4	338	10.5	-8.8	0.85	59	8.52997	13.1703	5.99578	0.655832	0.253696
						2011	12	5	339	11	-8.5	1.25	80.5	8.23722	12.8501	5.81993	0.650251	0.356263
						2011	12	6	340	10.6	-8.4	1.1	68	7.75655	11.79	5.4096	0.599646	0.293979
						2011	12	7	341	10.9	-9	0.95	76.5	6.47335	10.3056	4.62035	0.508095	0.228871
						2011	12	8	342	11.1	-8.5	1.3	61	6.37493	9.99588	4.51568	0.505853	0.29881
						2011	12	9	343	8.2	1.3	4.75	68	6.56016	3.62121	2.75714	0.364648	0.42581
						2011	12	10	344	9.8	2.1	5.95	75.5	7.69534	4.74033	3.41659	0.47591	0.601362
						2011	12	11	345	7.9	-2.7	2.6	66.5	11.743	9.95809	6.11721	0.731899	0.551748
						2011	12	12	346	7.3	-3.8	1.75	74.5	11.1103	9.86592	5.92251	0.67908	0.387229
						2011	12	13	347	8.2	-5.1	1.55	71.5	10.828	11.5209	6.31818	0.717036	0.39517
						2011	12	14	348	8.7	-3	2.85	74	9.21121	8.62169	5.04115	0.610545	0.530184
						2011	12	15	349	9.9	-1.3	4.3	77	10.9785	9.83669	5.87855	0.761957	0.823745
						2011	12	16	350	10.3	-3.1	3.6	68	10.0011	10.7212	5.85761	0.735195	0.768672
						2011	12	17	351	4.4	-3	0.7	32.5	12.929	7.65399	5.62733	0.610579	0.168348
						2011	12	18	352	4.8	-1.1	1.85	42	15.8478	7.48017	6.15908	0.709817	0.362953
						2011	12	19	353	6.6	-2.1	2.25	20.5	12.0127	8.36087	5.6692	0.666659	0.600665
						2011	12	20	354	2.6	-2.5	0.05	37	14.8555	6.06103	5.36773	0.561949	0.00995377
						2011	12	21	355	5	-1	2	33	6.78393	3.25628	2.65874	0.308752	0.242335
						2011	12	22	356	9.2	1	5.1	36	4.9348	3.23723	2.26098	0.303669	0.502827
						2011	12	23	357	12.9	-0.4	6.25	37.5	2.64779	2.81725	1.545	0.217928	0.527323
						2011	12	24	358	11.4	3.8	7.6	39.5	5.01199	3.04729	2.21074	0.329336	0.615884
						2011	12	25	359	11.8	6.2	9	40	13.0378	5.84091	4.93647	0.775925	1.05368
						2011	12	26	360	6.8	3.9	5.35	39	14.3372	3.32624	3.90647	0.5304	0.510782
						2011	12	27	361	9.7	1	5.35	34	8.21551	5.71799	3.87716	0.526421	0.781791
						2011	12	28	362	8.9	-3.7	2.6	40	5.97886	6.02669	3.39566	0.406277	0.424809
						2011	12	29	363	9	-4.7	2.15	36	1.56248	1.71248	0.925327	0.10827	0.177331
						2011	12	30	364	9.1	-3.8	2.65	28.5	6.83425	7.05295	3.92741	0.47105	0.556253
						2011	12	31	365	10.3	0.4	5.35	37	3.61788	2.86536	1.82134	0.247293	0.478858
																	937.768	1693.68
																	ETo-HS	ETo-TURC (Ousman Couly (2016)

## Sheet: 2012
	BATMAN					year	month	day	DOY	Tmax	Tmin	Tmean	RHmean.	Ra	Rs=0.16(Tmax-Tmin)^0.5*Ra	Rs=from meteorological station	ETo-HS	ETo-TURC (Ousman Couly (2016)
	DOY	246					#	#		°C	°C	°C	%	MJ m-2 day-1*(0.408 mm day-1)
	φ (-)	36.71	0.64071			2012	1	1	1	10.1	4.4	7.25	80	18.8089	8.57685	7.18489	1.05559	1.07747
	tan(φ)		0.745649			2012	1	2	2	7.6	1.4	4.5	90.5	15.0708	7.47512	6.00416	0.785281	0.684274
	sin(φ)		0.597765			2012	1	3	3	8.4	-0.2	4.1	80	11.4042	7.84609	5.35099	0.687299	0.661192
	cos(φ)		0.801671			2012	1	4	4	10.2	-5.5	2.35	65	7.13275	8.95873	4.52196	0.534404	0.463919
	dr	0.984766		(1+0.033*cos(2*3.14/365*DOY))		2012	1	5	5	10.7	-5.4	2.65	69.5	12.7176	16.3802	8.16465	0.979262	0.859678
	δ	0.120494		(0.409*sin(2*3.14/365*DOY-1.39))		2012	1	6	6	9.5	-3.9	2.8	71.5	13.8114	14.8058	8.08928	0.977339	0.823909
	tan(δ)	0.121081				2012	1	7	7	10.2	-1.3	4.45	78.5	8.49613	7.81644	4.60989	0.601573	0.702619
	sin(δ)	0.120203				2012	1	8	8	9.4	-2.7	3.35	81.5	13.8122	13.3702	7.68733	0.953573	0.874955
	cos(δ)	0.992749				2012	1	9	9	11.8	2.9	7.35	72	17.105	12.1787	8.16465	1.20432	1.45465
	X	0.991849				2012	1	10	10	12.9	4.5	8.7	70.5	18.5818	12.487	8.61685	1.33925	1.65883		-
	ωs (eq. 25)	1.49314		(acos{(-1*tan(-0.35)*tan(0.409*sin(2*3.14/365*DOY-1.39))))		2012	1	11	11	12.2	-1.2	5.5	68	16.1705	17.3348	9.47099	1.29425	1.61557
	sin ωs	0.996986				2012	1	12	12	8.3	4	6.15	81.5	25.0816	8.62808	8.32166	1.16892	0.966148
	sin φ*sin δ	-0.0718532		(sin(0.35)*sin(0.409*sin(2*3.14/365*DOY-1.39)))		2012	1	13	13	6	1.4	3.7	90.5	26.7207	9.83323	9.16953	1.15625	0.731334
	cos φ*cos δ	0.795859		(cos(0.35)*cos(0.409*sin(2*3.14/365*DOY-1.39))		2012	1	14	14	7.8	3	5.4	83.5	22.5031	8.64121	7.88831	1.07335	0.88059
	Gsc	0.082				2012	1	15	15	9.8	5.7	7.75	74.5	19.4633	6.38396	6.30562	0.944902	0.894887
						2012	1	16	16	11.8	6.9	9.35	62	24.0456	9.42588	8.51636	1.3561	1.37079
	Ra	25.4105				2012	1	17	17	9.7	4.4	7.05	70	23.325	9.88982	8.59172	1.2522	1.18739
						2012	1	18	18	5.7	0.4	3.05	88.5	20.1196	8.53069	7.41099	0.906255	0.556336
						2012	1	19	19	1.7	-2.6	-0.45	83	27.0314	9.29879	8.96855	0.91262	-0.109192
						2012	1	20	20	3.5	-6.1	-1.3	57.5	19.0033	14.5946	9.42075	0.91167	-0.490794
						2012	1	21	21	2.8	-9	-3.1	67	16.5006	15.5766	9.06904	0.781892	-1.42669
						2012	1	22	22	1.4	-0.6	0.4	83	34.7507	5.56011	7.86319	0.83934	0.0615983
						2012	1	23	23	4.2	0.4	2.3	88.5	32.4196	9.85557	10.1116	1.19202	0.492323
						2012	1	24	24	2.5	-2.6	-0.05	88	23.8823	9.74397	8.62941	0.898354	-0.0122693
						2012	1	25	25	2.2	-3.9	-0.85	95	23.1881	11.3158	9.16325	0.910935	-0.249641
						2012	1	26	26	5	2	3.5	87.5	36.8044	8.83305	10.1995	1.27417	0.640622
						2012	1	27	27	8.3	2.6	5.45	78.5	5.52429	2.51907	2.11025	0.287756	0.380784
						2012	1	28	28	8.9	1.3	5.1	77.5	4.15767	2.52786	1.83391	0.246309	0.363226
						2012	1	29	29	6.9	-1.3	2.8	73.5	18.9716	12.4454	8.69221	1.05018	0.708803
						2012	1	30	30	7.5	0.4	3.95	83	23.2757	13.2206	9.92319	1.26584	0.98933
						2012	1	31	31	7.1	3.3	5.2	81.5	36.3261	11.0431	11.33	1.52836	1.04805
						2012	2	1	32	6.7	0.8	3.75	85	26.4059	12.4636	10.2623	1.29706	0.902321
						2012	2	2	33	7.8	-1.7	3.05	69.5	22.1341	16.8219	10.9155	1.33481	0.99065
						2012	2	3	34	6.4	-6.9	-0.25	65.5	17.1999	18.3007	10.0362	1.03304	-0.107137
						2012	2	4	35	9.1	-7	1.05	65	18.8612	24.2932	12.1088	1.33869	0.535061
						2012	2	5	36	8.8	-8.5	0.15	63	16.7985	23.2492	11.1793	1.17692	0.0777737
						2012	2	6	37	9.5	-7.5	1	65.5	15.5371	21.1305	10.2498	1.13016	0.449896
						2012	2	7	38	3.6	-3	0.3	82	10.7872	5.69562	4.43403	0.470701	0.0473243
						2012	2	8	39	9.5	3.1	6.3	77	26.874	13.7595	10.8778	1.53754	1.45324
						2012	2	9	40	9.2	3.6	6.4	82	31.1181	13.9409	11.7822	1.67229	1.48623
						2012	2	10	41	8	3.5	5.75	69	23.2412	8.36681	7.88831	1.08954	0.898278
						2012	2	11	42	7.9	-3.5	2.2	70	15.1833	13.8471	8.20233	0.962134	0.631926
						2012	2	12	43	8.2	-6.8	0.7	67	12.3648	14.8378	7.66221	0.831369	0.23397
						2012	2	13	44	9	-4.8	2.1	67.5	18.4915	20.4146	10.9909	1.28278	0.856756
						2012	2	14	45	14.1	-2.4	5.85	58.5	22.6318	29.874	14.7089	2.04024	2.78018
						2012	2	15	46	14.9	0.4	7.65	55.5	15.8749	18.4149	9.67197	1.44368	2.1469
						2012	2	16	47	9.9	4.3	7.1	70.5	11.2131	5.02348	4.24562	0.620024	0.708451
						2012	2	17	48	8	0.2	4.1	77.5	10.6817	6.66538	4.77318	0.613084	0.582623
						2012	2	18	49	5.3	0.3	2.8	82	37.5667	15.0267	13.4403	1.62384	0.834678
						2012	2	19	50	4.2	-0.3	1.95	79	46.5563	16.7603	15.8017	1.83037	0.672271
						2012	2	20	51	5.5	-2.5	1.5	68.5	34.4176	22.0273	15.5756	1.76308	0.679669
						2012	2	21	52	6.5	-6.8	-0.15	63.5	28.2431	30.0507	16.48	1.70597	-0.100642
						2012	2	22	53	7.5	-7.3	0.1	64	25.3043	29.9603	15.5756	1.63519	0.0657987
						2012	2	23	54	8.4	-8.1	0.15	59.5	10.2433	13.5211	6.65733	0.700862	0.0479153
						2012	2	24	55	9.3	-8.3	0.5	61	9.73086	13.7011	6.53172	0.701046	0.157911
						2012	2	25	56	11	-4.1	3.45	59	13.3946	16.1807	8.32794	1.03792	1.0591
						2012	2	26	57	11.4	-6.3	2.55	58	23.9411	33.9006	16.1158	1.92346	1.62112
						2012	2	27	58	9.6	2.2	5.9	59.5	37.5462	22.2273	16.3419	2.27153	2.12806
						2012	2	28	59	17	6.6	11.8	51.5	27.5328	22.9073	14.2065	2.4663	3.41194
						2012	3	1	60	12	5.3	8.65	64	38.2456	20.4997	15.8394	2.45716	2.56128
						2012	3	2	61	4.3	0.3	2.3	79.5	47.8496	15.3119	15.3119	1.80506	0.717198
						2012	3	3	62	5.8	-0.1	2.85	77	25.5978	12.0822	9.94831	1.20486	0.701464
						2012	3	4	63	6.2	-2.8	1.7	70	39.0438	28.1115	18.741	2.14336	0.953066
						2012	3	5	64	3.6	0.2	1.9	74	61.7778	16.8036	18.226	2.10584	0.658479
						2012	3	6	65	4.2	-5.7	-0.75	67	34.7733	27.5404	17.5058	1.75055	-0.483444
						2012	3	7	66	2	-1.2	0.4	80	60.7387	15.5491	17.3844	1.85567	0.142029
						2012	3	8	67	5.1	-0.3	2.4	86.5	43.3107	18.7102	16.1032	1.90779	0.889389
						2012	3	9	68	10.5	-1.2	4.65	69.5	28.0467	26.2518	15.3495	2.02106	2.07912
						2012	3	10	69	11.2	-4.4	3.4	68	10.8526	13.5441	6.85831	0.852748	0.89556
						2012	3	11	70	9.7	-1.1	4.3	50	35.2119	30.4231	18.5149	2.39984	2.24559
						2012	3	12	71	10.4	-8.5	0.95	47.5	24.5591	37.1333	17.083	1.87859	0.750083
						2012	3	13	72	7.7	-1.6	3.05	61	19.5134	14.5179	9.52124	1.16431	0.869961
						2012	3	14	73	15.7	-1.3	7.2	60.5	15.499	21.0787	10.2247	1.49919	2.32939
						2012	3	15	74	16.5	0.8	8.65	57.5	32.6521	41.0111	20.7005	3.21126	4.88692
						2012	3	16	75	15.2	1.4	8.3	67.5	34.4048	37.9829	20.4493	3.13031	4.42522
						2012	3	17	76	8.9	1.2	5.05	60	45.6628	28.1283	20.2735	2.71695	2.35944
						2012	3	18	77	6.9	-0.7	3.1	45	36.5932	22.2487	16.1409	1.97853	1.38454
						2012	3	19	78	12.5	-2.9	4.8	26	30.608	37.7091	19.2183	2.54737	4.01643
						2012	3	20	79	15.4	-6.4	4.5	47	22.1947	38.7076	16.5805	2.16856	3.04368
						2012	3	21	80	18.9	-4.6	7.15	46.5	13.6359	25.6354	10.5764	1.54766	2.91314
						2012	3	22	81	18.9	-3.6	7.65	45	19.6952	35.4513	14.9476	2.23114	4.21141
						2012	3	23	82	18.9	-3.8	7.55	44	21.981	39.9175	16.7564	2.4913	4.73374
						2012	3	24	83	17.4	-4.3	6.55	46.5	25.6501	44.5286	19.1178	2.73027	4.61216
						2012	3	25	84	18.1	-4.6	6.75	46	25.0788	45.543	19.1178	2.7527	4.84449
						2012	3	26	85	17.8	-2	7.9	45.5	30.1518	47.7605	21.4667	3.23569	5.67389
						2012	3	27	86	15.6	5.7	10.65	53.5	41.7179	33.0406	21.002	3.50438	4.52178
						2012	3	28	87	11.5	6.5	9	70	41.0074	16.403	14.6712	2.30606	2.14981
						2012	3	29	88	11.2	-1.2	5	63	31.4349	31.1835	17.711	2.36835	2.57869
						2012	3	30	89	14.4	6.3	10.35	71	15.5851	10.0992	7.09696	1.17171	1.54276
						2012	3	31	90	14.7	3.1	8.9	69	38.1251	35.3801	20.7759	3.25341	4.32552
						2012	4	1	91	12.3	4.7	8.5	71.5	36.9634	22.4738	16.3042	2.51491	2.75428
						2012	4	2	92	17.8	7.6	12.7	63	43.6563	35.6236	22.3083	3.99057	5.36023
						2012	4	3	93	19.8	9.4	14.6	53.5	41.9565	34.9078	21.6489	4.11385	5.65716
						2012	4	4	94	20.4	3.7	12.05	60	31.3521	41.8864	20.4996	3.58886	6.07296
						2012	4	5	95	21.8	3	12.4	50	26.6884	40.1394	18.5149	3.27942	5.92444
						2012	4	6	96	22.7	3.4	13.05	49.5	21.6228	33.3855	15.1988	2.75	5.15299
						2012	4	7	97	24.3	7.5	15.9	47.5	23.5206	31.6117	15.4249	3.04874	5.5679
						2012	4	8	98	27.6	8.1	17.85	59	29.2629	45.6501	20.6754	4.32296	8.04169
						2012	4	9	99	20.7	11.1	15.9	59.5	47.3056	36.3307	23.4514	4.63518	6.12867
						2012	4	10	100	25.2	10.4	17.8	57.5	25.7125	30.4436	15.8269	3.30455	5.47318
						2012	4	11	101	22	10.5	16.25	71	35.4199	32.5863	19.2183	3.83796	5.58981
						2012	4	12	102	20.6	9.4	15	57	30.0969	26.9668	16.1158	3.10022	4.50381
						2012	4	13	103	22.1	10.6	16.35	62.5	37.8275	34.8013	20.5247	4.11088	5.96438
						2012	4	14	104	23.1	3.5	13.3	57.5	27.4503	43.0421	19.4444	3.54669	6.57525
						2012	4	15	105	25.8	5.4	15.6	55.5	26.0724	42.5501	18.8415	3.69088	7.05489
						2012	4	16	106	24.9	7.9	16.4	74	24.1054	32.7833	15.9022	3.18972	5.64636
						2012	4	17	107	18.2	9.5	13.85	62	52.7797	36.7347	24.9085	4.62369	5.77795
						2012	4	18	108	21.8	8.5	15.15	60.5	34.4213	36.6242	20.085	3.88147	6.03056
						2012	4	19	109	24.3	5.3	14.8	61.5	32.7252	49.7423	22.8233	4.3638	7.98009
						2012	4	20	110	19.9	11.4	15.65	59.5	52.3469	35.5959	24.4186	4.79054	5.96519
						2012	4	21	111	22.2	5.5	13.85	60.5	35.6745	47.6611	23.3258	4.3299	7.40404
						2012	4	22	112	23.8	5.8	14.8	57	32.9743	47.483	22.3837	4.27974	7.63225
						2012	4	23	113	25	6.3	15.65	54.5	32.6054	48.7777	22.5596	4.42583	8.0517
						2012	4	24	114	24.2	4.4	14.3	54	29.746	47.1177	21.1778	3.98708	7.44498
						2012	4	25	115	26.1	4.8	15.45	54	29.2919	49.9134	21.63	4.2181	8.17965
						2012	4	26	116	27.5	5.3	16.4	53	22.4271	39.8305	16.9071	3.39128	6.78738
						2012	4	27	117	28.3	6.5	17.4	54	21.043	36.6989	15.7201	3.24538	6.45764
						2012	4	28	118	26.9	6.5	16.7	55	33.0598	53.9535	23.891	4.83417	9.1526
						2012	4	29	119	27.2	5.5	16.35	55	31.5486	54.7684	23.5142	4.70965	9.19256
						2012	4	30	120	28.8	7.9	18.35	55.5	33.8125	56.5344	24.7326	5.2438	9.99955
						2012	5	1	121	26.4	8.1	17.25	51.5	36.41	53.3042	24.921	5.12297	9.18513
						2012	5	2	122	29.3	7.2	18.25	54	32.531	57.5148	24.4688	5.17352	10.1418
						2012	5	3	123	29	8.2	18.6	55	31.3977	52.2457	22.9113	4.89123	9.3244
						2012	5	4	124	28.5	15	21.75	71.5	42.8189	46.2444	25.1722	5.83897	8.86788
						2012	5	5	125	24	13.9	18.95	60	50.1464	40.5183	25.4988	5.49599	7.37267
						2012	5	6	126	25.9	13	19.45	65.5	38.5574	39.7913	22.1576	4.8408	7.33013
						2012	5	7	127	24	11.2	17.6	59.5	40.3315	41.2995	23.0871	4.79337	7.26175
						2012	5	8	128	24.7	10.8	17.75	64	34.5335	38.4013	20.6	4.29512	6.80315
						2012	5	9	129	25.7	11.1	18.4	63.5	34.2708	40.0283	20.9517	4.44833	7.19289
						2012	5	10	130	27.5	9.7	18.6	58.5	27.5023	39.1632	18.5652	3.9634	7.07935
						2012	5	11	131	27	9.8	18.4	56	36.7233	50.5313	24.3683	5.17372	8.98658
						2012	5	12	132	30	13	21.5	58	29.9698	40.759	19.771	4.55711	7.82434
						2012	5	13	133	25.2	11.6	18.4	56	41.3413	44.9793	24.3935	5.17905	8.03843
						2012	5	14	134	29.4	10.8	20.1	57.5	36.2608	53.956	25.0215	5.56187	9.94937
						2012	5	15	135	26.4	11	18.7	62.5	18.4048	22.6747	11.5561	2.47385	4.25998
						2012	5	16	136	25.1	10.6	17.85	64	40.9036	47.4482	24.921	5.21067	8.34459
						2012	5	17	137	27.7	10.8	19.25	58.5	32.2354	43.5823	21.203	4.60737	7.95765
						2012	5	18	138	27.4	11.9	19.65	54.5	26.9597	33.43	16.9825	3.7301	6.24445
						2012	5	19	139	29.2	8.6	18.9	60.5	36.1507	59.5764	26.2525	5.65073	10.6579
						2012	5	20	140	27.3	12.1	19.7	56	38.1384	46.3763	23.7905	5.23243	8.52979
						2012	5	21	141	31.2	15.1	23.15	54.5	39.718	51.1568	25.4988	6.1241	10.0164
						2012	5	22	142	27.6	10.6	19.1	55	38.1858	51.9328	25.1911	5.45182	9.38031
						2012	5	23	143	28.3	9.6	18.95	56	36.8899	55.1872	25.524	5.5014	9.9109
						2012	5	24	144	29.6	8.3	18.95	58.5	34.0208	57.9714	25.122	5.41476	10.3927
						2012	5	25	145	28.6	9.9	19.25	57.5	36.7809	55.0243	25.4486	5.52993	9.95123
						2012	5	26	146	27.3	10.5	18.9	56.5	25.8573	34.7522	16.9573	3.64999	6.36751
						2012	5	27	147	26.8	7.5	17.15	55.5	37.4913	57.8866	26.353	5.40188	9.91807
						2012	5	28	148	29	7.5	18.25	53.5	36.8421	63.3683	27.3327	5.77905	11.1378
						2012	5	29	149	29.7	9.2	19.45	52.5	36.2388	59.4316	26.2525	5.73541	10.7676
						2012	5	30	150	32.3	10.3	21.3	43.5	37.2579	65.5739	27.9608	6.41201	13.451
						2012	5	31	151	34.3	17.3	25.8	49.5	41.8892	56.9694	27.6342	7.06645	11.6601
						2012	6	1	152	32.6	10.1	21.35	46	34.3921	61.9058	26.1018	5.99335	12.318
						2012	6	2	153	30.8	9.9	20.35	47.5	35.6327	59.5779	26.0641	5.83183	11.3982
						2012	6	3	154	31.3	8	19.65	45	34.0893	63.5424	26.3279	5.78276	12.3624
						2012	6	4	155	34.6	8.6	21.6	45.5	34.688	72.151	28.2999	6.53958	14.4556
						2012	6	5	156	36.4	9.8	23.1	43	30.1618	64.1843	24.8896	5.97049	13.7021
						2012	6	6	157	35.4	11.5	23.45	41.5	33.9638	64.9387	26.5665	6.42727	14.2115
						2012	6	7	158	35.2	9.8	22.5	40	31.3412	63.6853	25.2727	5.97345	13.9819
						2012	6	8	159	34.2	12.9	23.55	33	36.6064	62.3773	27.0313	6.55556	15.1736
						2012	6	9	160	33.7	14	23.85	41.5	35.1631	55.4171	24.9713	6.09991	12.273
						2012	6	10	161	35	13.5	24.25	39.5	35.0135	60.2232	25.9761	6.40632	13.725
						2012	6	11	162	37.1	12.8	24.95	38	27.6153	53.6842	21.7808	5.46107	12.6492
						2012	6	12	163	37.2	14.3	25.75	32.5	35.3454	64.7528	27.0627	6.91237	16.3673
						2012	6	13	164	38.1	18	28.05	33.5	38.0685	61.2141	27.3076	7.3433	15.8005
						2012	6	14	165	38.9	16.2	27.55	35	36.4647	66.2199	27.7975	7.39351	16.649
						2012	6	15	166	40.3	17.4	28.85	28	34.2052	62.664	26.1897	7.16556	17.3578
						2012	6	16	167	41.7	18	29.85	28	33.6552	63.8103	26.2148	7.32618	17.8698
						2012	6	17	168	40.4	18.9	29.65	29	37.0622	63.7469	27.496	7.65199	17.6189
						2012	6	18	169	39.4	19.3	29.35	22.5	38.4888	61.8899	27.6091	7.63487	18.2821
						2012	6	19	170	33.6	17.9	25.75	25	43.9853	55.2455	27.8854	7.12251	15.2427
						2012	6	20	171	35.9	19.6	27.75	23.5	43.2168	56.3547	27.9168	7.458	16.213
						2012	6	21	172	36.8	17.9	27.35	25	37.5248	56.7376	26.1018	6.91187	15.9835
						2012	6	22	173	38.5	15.7	27.1	28	36.0147	65.6909	27.5149	7.24572	17.7765
						2012	6	23	174	39.3	16.4	27.85	30	35.9114	65.7897	27.496	7.36171	17.5841
						2012	6	24	175	36.1	18.5	27.3	33.5	40.7386	57.36	27.3453	7.23315	14.6978
						2012	6	25	176	37.6	15.8	26.7	21	35.6797	62.2254	26.6544	6.95661	18.0547
						2012	6	26	177	37.3	7.7	22.5	21.5	30.9806	73.3622	26.9685	6.37425	19.748
						2012	6	27	178	37.8	25.9	31.85	28.5	48.5652	46.2341	26.8052	7.80559	13.3121
						2012	6	28	179	38.5	19.6	29.05	34	36.5226	55.2222	25.4046	6.98056	14.3949
						2012	6	29	180	36.6	20.1	28.35	34.5	42.0747	55.5386	27.3453	7.40154	14.2702
						2012	6	30	181	35.2	16.8	26	26	39.651	58.3663	27.2134	6.99077	15.9596
						2012	7	1	182	34.9	13.9	24.4	29	37.2781	62.6272	27.3327	6.76493	16.1517
						2012	7	2	183	36.3	13.3	24.8	18	36.6845	67.4994	28.1492	7.03305	19.5873
						2012	7	3	184	32.8	24	28.4	32.5	57.9042	40.7646	27.4835	7.447	10.8667
						2012	7	4	185	34	15.4	24.7	26.5	41.4851	61.7298	28.6265	7.13552	16.4413
						2012	7	5	186	33.5	13.4	23.45	27	38.1035	61.2705	27.3327	6.61264	15.9152
						2012	7	6	187	34.7	14.9	24.8	27.5	37.6148	59.5819	26.7801	6.69097	15.742
						2012	7	7	188	36.9	18.8	27.85	25	41.2976	59.799	28.1115	7.5265	16.9229
						2012	7	8	189	38.7	16.8	27.75	25	38.5004	67.4526	28.8275	7.70129	18.9918
						2012	7	9	190	38.3	17.7	28	21.5	36.7907	60.6311	26.7172	7.17671	17.8157
						2012	7	10	191	38.3	21	29.65	30	40.0711	55.4584	26.667	7.42127	15.2315
						2012	7	11	192	38.2	18.1	28.15	27	36.9828	59.4684	26.5288	7.14943	16.5398
						2012	7	12	193	38.4	17.9	28.15	22	36.2214	59.4032	26.2399	7.07158	17.4106
						2012	7	13	194	39.5	19.9	29.7	22	36.8841	57.8343	26.1269	7.27862	17.2799
						2012	7	14	195	39.8	18.4	29.1	19	34.5861	59.2114	25.5993	7.04157	18.093
						2012	7	15	196	41.3	19.4	30.35	21	35.7827	62.6913	26.7926	7.56623	19.0077
						2012	7	16	197	40.3	21.1	30.7	20	37.6784	57.8741	26.4158	7.51404	17.8393
						2012	7	17	198	39.7	28.4	34.05	24	46.3114	41.8655	24.9085	7.57467	12.9726
						2012	7	18	199	40.6	21.8	31.2	27.5	36.3209	54.6266	25.1974	7.24135	15.6902
						2012	7	19	200	38.1	22.5	30.3	14	41.2638	51.4972	26.0766	7.35639	16.8258
						2012	7	20	201	42.5	29.5	36	19	44.1571	45.9234	25.4737	8.0379	15.1593
						2012	7	21	202	39.6	17.7	28.65	13.5	32.0753	56.1958	24.0166	6.54283	18.0433
						2012	7	22	203	42	29.3	35.65	24	44.4553	45.1666	25.3481	7.94623	14.1409
						2012	7	23	204	30.5	24.3	27.4	17	59.8103	29.6659	23.8282	6.31681	9.36073
						2012	7	24	205	44.5	32	38.25	17.5	36.2606	36.2606	20.5121	6.74301	12.5047
						2012	7	25	206	43.3	25.7	34.5	19.5	35.8171	50.4304	24.0418	7.37456	16.2919
						2012	7	26	207	37.8	22.7	30.25	16.5	39.2948	47.4681	24.4311	6.88502	15.1854
						2012	7	27	208	42	24.5	33.25	16.5	37.0077	51.8108	24.7703	7.41643	17.0252
						2012	7	28	209	43.2	23.2	33.2	16	33.7925	54.068	24.1799	7.23258	17.8156
						2012	7	29	210	36.3	22.5	29.4	18.5	40.8293	45.0755	24.2679	6.71802	14.0384
						2012	7	30	211	42.1	29.5	35.8	35.5	40.2523	40.5743	22.861	7.18668	11.2513
						2012	7	31	212	38.3	24.1	31.2	45.5	41.1043	46.6945	24.7829	7.12222	10.8696
						2012	8	1	213	38.6	22.2	30.4	25	36.3095	47.638	23.5268	6.65085	14.009
						2012	8	2	214	40.2	26	33.1	24	38.6668	43.9255	23.3132	6.95966	13.4624
						2012	8	3	215	39.9	20.1	30	20	32.8865	52.0922	23.4137	6.56396	15.9967
						2012	8	4	216	39.3	16.8	28.05	15.5	29.6917	53.4451	22.5344	6.05974	16.7459
						2012	8	5	217	39.6	15.9	27.75	17	29.0673	55.1117	22.6412	6.04861	16.937
						2012	8	6	218	40.9	16.4	28.65	21	28.4223	55.7077	22.5093	6.13219	16.6322
						2012	8	7	219	40.4	19.3	29.85	22.5	29.8748	50.4286	21.9566	6.13616	15.0926
						2012	8	8	220	40.7	21	30.85	21	26.4608	41.7022	18.7913	5.36175	12.9185
						2012	8	9	221	40.6	24.3	32.45	26	28.5454	37.2232	18.4395	5.43443	11.192
						2012	8	10	222	38.6	19.9	29.25	23.5	32.6417	48.832	22.5847	6.2322	14.385
						2012	8	11	223	39.8	20.6	30.2	17	31.4972	48.3798	22.0822	6.21659	15.3816
						2012	8	12	224	41.8	19.1	30.45	21	31.2496	56.7492	23.8219	6.74128	17.283
						2012	8	13	225	40.8	21.9	31.35	25	34.4429	52.0777	23.958	6.90625	15.414
						2012	8	14	226	40.2	21.5	30.85	23.5	33.1864	49.6468	22.9615	6.55166	14.8767
						2012	8	15	227	41.7	21.2	31.45	21.5	29.5979	48.5405	21.4416	6.19344	14.9537
						2012	8	16	228	41.5	20.2	30.85	27.5	27.1486	46.2612	20.0474	5.72016	13.3269
						2012	8	17	229	39.7	20.5	30.1	27.5	31.3539	48.1596	21.9817	6.17541	13.7381
						2012	8	18	230	39.9	21.9	30.9	24.5	33.5109	48.2557	22.748	6.4974	14.3343
						2012	8	19	231	39.8	20.9	30.35	21.5	30.3196	45.8433	21.0899	5.95579	13.9932
						2012	8	20	232	39.1	20.4	29.75	25.5	29.737	44.4866	20.5749	5.73795	12.9586
						2012	8	21	233	38.4	18.2	28.3	25.5	22.8998	37.006	16.4675	4.45242	10.6937
						2012	8	22	234	37	17.2	27.1	23.5	26.0234	41.221	18.5275	4.879	11.9145
						2012	8	23	235	38.6	16.7	27.65	24	20.2819	35.5339	15.1862	4.04811	10.3699
						2012	8	24	236	39.1	16.6	27.85	20	10.1621	18.2917	7.71245	2.06491	5.86649
						2012	8	25	237	39.9	17.7	28.8	19	21.5773	38.3213	16.2665	4.44578	11.8852
						2012	8	26	238	41.2	19.2	30.2	18	23.3489	41.0941	17.5226	4.93296	13.0334
						2012	8	27	239	41.8	19.8	30.8	17.5	25.7591	45.3361	19.3314	5.5102	14.4774
						2012	8	28	240	41.2	21.9	31.55	16	25.0895	38.7382	17.6356	5.10442	12.7449
						2012	8	29	241	40.9	18.5	29.7	15	22.1443	39.6825	16.7689	4.67162	12.906
						2012	8	30	242	41.2	21.6	31.4	16.5	29.3654	46.045	20.801	6.0023	14.9306
						2012	8	31	243	39.2	27.5	33.35	21	38.1684	35.7256	20.8889	6.26657	11.4359
						2012	9	1	244	37.1	21.1	29.1	28.5	31.9913	40.9489	20.4744	5.63187	11.508
						2012	9	2	245	36	18.7	27.35	30.5	30.0486	41.5873	19.9971	5.29533	11.1801
						2012	9	3	246	35.2	17.2	26.2	32	29.5325	42.5269	20.0474	5.17342	11.0573
						2012	9	4	247	34.9	18.7	26.8	29.5	32.5539	42.1899	20.9643	5.48382	11.3783
						2012	9	5	248	36.7	20.7	28.7	23	27.7421	35.5099	17.755	4.84218	10.6077
						2012	9	6	249	37.7	16.4	27.05	20	26.9615	45.9424	19.9092	5.23702	13.6836
						2012	9	7	250	38.4	15.9	27.15	17.5	23.8825	42.9885	18.1255	4.77846	13.1804
						2012	9	8	251	39.5	16.4	27.95	24.5	26.3308	48.6592	20.2483	5.43311	13.9674
						2012	9	9	252	38.3	19.4	28.85	25.5	24.0715	36.3961	16.7438	4.58114	10.5968
						2012	9	10	253	36.8	18.1	27.45	27.5	27.9579	41.825	19.3439	5.13371	11.6328
						2012	9	11	254	36	17.4	26.7	25	28.3788	42.2276	19.5826	5.11091	11.9382
						2012	9	12	255	35.1	23.3	29.2	25	34.6925	32.7497	19.0676	5.25608	9.68327
						2012	9	13	256	34.8	24.1	29.45	27.5	30.8521	26.4094	16.1472	4.47472	7.73489
						2012	9	14	257	35.7	17.8	26.75	26	19.0753	27.3158	12.9127	3.37391	7.84317
						2012	9	15	258	34.4	13.2	23.8	22	24.6209	41.757	18.1381	4.4254	11.6728
						2012	9	16	259	36.4	12.6	24.5	19.5	23.3659	44.4887	18.2386	4.5248	12.8584
						2012	9	17	260	36.8	12.8	24.8	17	22.7075	43.5983	17.7989	4.44705	12.986
						2012	9	18	261	37.5	14.2	25.85	19	21.8832	40.7902	16.9008	4.32673	12.137
						2012	9	19	262	37.2	14.4	25.8	19.5	23.5193	42.8992	17.9685	4.5948	12.6619
						2012	9	20	263	36.2	13.4	24.8	24	22.2616	40.6051	17.0076	4.24933	11.3105
						2012	9	21	264	34.5	16.4	25.45	29.5	25.0129	36.2187	17.0264	4.31895	9.66004
						2012	9	22	265	33.2	13.8	23.5	33	24.8109	38.5065	17.4849	4.23527	9.54726
						2012	9	23	266	33.7	15.2	24.45	34	9.52772	14.101	6.55684	1.62476	3.8218
						2012	9	24	267	32.9	15.2	24.05	25.5	25.0421	35.4596	16.8569	4.13752	9.6782
						2012	9	25	268	33	10.9	21.95	23.5	24.5485	43.4018	18.4647	4.30474	11.549
						2012	9	26	269	34.8	11	22.9	20.5	18.7957	35.787	14.6712	3.50211	10.0846
						2012	9	27	270	34.1	11.9	23	20	14.5959	25.9224	11.0034	2.63303	7.50858
						2012	9	28	271	34	12.4	23.2	20	22.2128	38.3837	16.5177	3.97193	10.8858
						2012	9	29	272	35.1	11.4	23.25	18	21.738	41.2153	16.9322	4.07657	11.8904
						2012	9	30	273	35.6	13	24.3	18.5	16.4974	29.8273	12.5484	3.09842	8.87094
						2012	10	1	274	35.7	11.8	23.75	14.5	23.1885	44.3364	18.1381	4.42008	13.2945
						2012	10	2	275	36.9	13.5	25.2	18	22.234	41.622	17.2086	4.33992	12.3777
						2012	10	3	276	36.3	14.2	25.25	29.5	22.1438	39.1502	16.6559	4.20542	10.3688
						2012	10	4	277	35	18	26.5	35	24.9431	33.9227	16.4549	4.27531	8.65637
						2012	10	5	278	33.7	15	24.35	34	23.274	34.8179	16.1032	3.98087	8.69833
						2012	10	6	279	32	13.6	22.8	32	24.1585	35.5613	16.5805	3.94814	8.85052
						2012	10	7	280	30.3	12	21.15	28	25.3255	37.0765	17.3342	3.95985	9.33616
						2012	10	8	281	31.1	17.1	24.1	32	28.1574	31.5363	16.8569	4.14246	8.07729
						2012	10	9	282	31.8	18.8	25.3	38.5	25.2575	26.2678	14.5708	3.68322	6.42554
						2012	10	10	283	28.3	12.8	20.55	63	24.4073	30.2651	15.3747	3.45811	5.79797
						2012	10	11	284	23.1	14.7	18.9	51.5	31.7056	21.3062	14.7027	3.16468	4.0436
						2012	10	12	285	30.3	15.2	22.75	54.5	21.7283	26.2478	13.5094	3.21287	5.2941
						2012	10	13	286	26.3	9.8	18.05	49	22.9604	30.3077	14.9225	3.1376	5.56342
						2012	10	14	287	26.9	7.9	17.4	39.5	17.7224	26.938	12.36	2.5517	5.55753
						2012	10	15	288	28.6	7.2	17.9	34	12.4479	21.3109	9.21349	1.92913	4.84899
						2012	10	16	289	28.8	6.4	17.6	33	16.9524	30.3787	12.8373	2.6653	6.75372
						2012	10	17	290	29.6	6.9	18.25	29.5	19.1798	34.8305	14.621	3.09137	8.12178
						2012	10	18	291	30.4	7.9	19.15	28	19.2318	34.6172	14.5959	3.1631	8.3865
						2012	10	19	292	30.7	7.2	18.95	29.5	17.7817	33.4295	13.792	2.97271	7.94601
						2012	10	20	293	29.5	8.5	19	55.5	19.5641	32.8677	14.3447	3.09604	6.05592
						2012	10	21	294	20.5	13.8	17.15	69.5	34.3634	18.4188	14.2316	2.91722	3.39145
						2012	10	22	295	22.4	13.7	18.05	63.5	13.9735	9.72553	6.59452	1.38657	2.00042
						2012	10	23	296	36.6	10	23.3	76.5	12.9156	27.4844	10.658	2.56913	5.57745
						2012	10	24	297	21.1	15.1	18.1	71.5	29.454	14.1379	11.5436	2.43054	2.7509
						2012	10	25	298	22.5	13.1	17.8	85	23.8135	17.9078	11.6817	2.43908	3.36426
						2012	10	26	299	16.6	13.5	15.05	82.5	33.5306	8.31559	9.44587	1.81989	1.61555
						2012	10	27	300	16.2	13.5	14.85	57	40.0613	8.65325	10.5324	2.01687	1.65684
						2012	10	28	301	36.6	13	24.8	70.5	11.0698	20.8997	8.60428	2.14977	4.44083
						2012	10	29	302	36.6	7.8	22.2	69	10.2548	23.627	8.80526	2.06571	4.75764
						2012	10	30	303	36.6	7.6	22.1	59.5	14.724	34.1597	12.6866	2.96884	6.69399
						2012	10	31	304	36.6	8	22.3	60	13.6963	31.3371	11.7194	2.75625	6.19522
						2012	11	1	305	36.6	7.6	22.1	60	15.4967	35.9523	13.3523	3.12463	7.02501
						2012	11	2	306	36.6	9.2	22.9	56	13.4981	29.5878	11.3049	2.69854	5.93352
						2012	11	3	307	23.8	15.5	19.65	49	24.1707	16.0493	11.1416	2.44719	3.23447
						2012	11	4	308	20.2	13.6	16.9	64.5	24.9357	13.1661	10.2498	2.08599	2.50554
						2012	11	5	309	23.1	8.9	16	61	17.5417	19.9274	10.5764	2.09663	3.52278
						2012	11	6	310	23.7	7.5	15.6	75	17.4765	22.6496	11.2547	2.20469	3.90982
						2012	11	7	311	23.1	6.6	14.85	76	17.7421	23.4196	11.531	2.2081	3.93411
						2012	11	8	312	23.2	6.3	14.75	67	13.4823	18.2281	8.86807	1.69296	3.12285
						2012	11	9	313	25.1	8.2	16.65	68.5	14.399	19.4674	9.47099	1.91361	3.5156
						2012	11	10	314	24.6	12	18.3	68	19.0203	19.1725	10.8025	2.28717	3.62228
						2012	11	11	315	20.2	15	17.6	71	28.0238	11.6579	10.2247	2.12285	2.30088
						2012	11	12	316	22.2	13.6	17.9	72	19.3818	13.3347	9.09416	1.90414	2.60156
						2012	11	13	317	19.2	8.9	14.05	70.5	11.7171	9.65491	6.01672	1.12392	1.76093
						2012	11	14	318	18.6	9.7	14.15	65.5	17.6313	12.5535	8.41587	1.57702	2.20355
						2012	11	15	319	18.7	7.6	13.15	64.5	18.8274	16.7187	10.0362	1.8218	2.72375
						2012	11	16	320	19	6.3	12.65	69	16.0484	16.3052	9.15069	1.63421	2.60892
						2012	11	17	321	19.2	4.4	11.8	62.5	15.805	18.7131	9.72849	1.68891	2.83947
						2012	11	18	322	17.8	3.4	10.6	81.5	14.399	16.5876	8.74246	1.4562	2.39745
						2012	11	19	323	17.7	2.8	10.25	82.5	7.80984	9.30933	4.82342	0.793517	1.43451
						2012	11	20	324	16.7	7.4	12.05	77.5	13.0132	9.68182	6.34959	1.11162	1.62564
						2012	11	21	325	19.2	9.2	14.2	69.5	11.3702	9.09619	5.75294	1.07971	1.68636
						2012	11	22	326	19.3	8.2	13.75	69.5	13.4313	11.927	7.15977	1.32485	2.07817
						2012	11	23	327	17.6	6.5	12.05	71	7.5875	6.7377	4.04464	0.708096	1.21907
						2012	11	24	328	17.4	10.1	13.75	76	17.521	10.2323	7.57428	1.40155	1.82691
						2012	11	25	329	14.4	10	12.2	70.5	19.6114	6.90322	6.58196	1.1581	1.25045
						2012	11	26	330	14.2	7.8	11	69.5	21.3813	10.9472	8.65453	1.46185	1.70988
						2012	11	27	331	15.3	5.9	10.6	77.5	20.8176	15.6548	10.2121	1.70099	2.27772
						2012	11	28	332	15.3	0.9	8.1	73	2.08951	2.40712	1.26866	0.192714	0.488842
						2012	11	29	333	16.4	0	8.2	69	8.25832	10.8349	5.35099	0.815972	1.41617
						2012	11	30	334	14.7	-1	6.85	74	12.0068	15.0805	7.61197	1.10048	1.66872
						2012	12	1	335	12.1	-0.2	5.95	82	18.5569	18.26	10.4131	1.45048	1.79168
						2012	12	2	336	14.8	-1.5	6.65	86	12.7754	16.6592	8.25258	1.18341	1.78528
						2012	12	3	337	15.3	-1.3	7	82.5	12.6402	16.7862	8.24002	1.19853	1.86188
						2012	12	4	338	12.4	-1.4	5.5	92.5	13.3139	14.6985	7.91343	1.08141	1.39632
						2012	12	5	339	12	5.4	8.7	81	19.4963	10.2941	8.01392	1.24554	1.40928
						2012	12	6	340	12.3	6.4	9.35	84	18.0348	8.51245	7.00904	1.11608	1.26206
						2012	12	7	341	10.7	1.9	6.3	84	14.0791	9.91168	6.68245	0.944541	1.10044
						2012	12	8	342	10.1	6.8	8.45	86	24.374	6.43473	7.0844	1.09069	0.952261
						2012	12	9	343	10.3	7	8.65	72.5	1.94473	0.513409	0.565245	0.087686	0.295181
						2012	12	10	344	11	4.3	7.65	70	18.5011	9.91657	7.66221	1.14369	1.25711
						2012	12	11	345	7.3	0.7	4	76.5	19.9242	10.52	8.18977	1.04712	0.822965
						2012	12	12	346	11.9	5.3	8.6	83	20.1686	10.649	8.29026	1.28363	1.43908
						2012	12	13	347	9.4	4.2	6.8	78	20.3121	8.44983	7.41099	1.06925	1.01917
						2012	12	14	348	9.1	1.5	5.3	78	17.7983	10.8213	7.85062	1.06361	1.04499
						2012	12	15	349	9.1	1	5.05	80.5	14.73	9.54505	6.70757	0.898917	0.908462
						2012	12	16	350	9	-1.6	3.7	79	13.2139	11.2054	6.88343	0.867983	0.815499
						2012	12	17	351	6.7	-2.2	2.25	81	15.105	10.7548	7.21001	0.847849	0.519375
						2012	12	18	352	6.7	0	3.35	83	19.1077	10.2417	7.91343	0.981619	0.6979
						2012	12	19	353	6.5	2.2	4.35	84	19.0053	6.53781	6.30562	0.819162	0.601271
						2012	12	20	354	9	6.1	7.55	62	27.8447	6.45996	7.58684	1.12799	0.887414
						2012	12	21	355	10.9	7.9	9.4	66.5	12.8725	3.08939	3.56732	0.569088	0.618555
						2012	12	22	356	10.7	7.1	8.9	75	5.95821	1.71596	1.80878	0.283247	0.439358
						2012	12	23	357	11.2	4.9	8.05	76	11.3851	5.73807	4.5722	0.693193	0.847503
						2012	12	24	358	10.7	7.5	9.1	76.5	9.83054	2.51662	2.81366	0.443908	0.539223
						2012	12	25	359	10.8	7.2	9	70	20.44	5.88671	6.20513	0.975335	0.927292
						2012	12	26	360	10.8	3	6.9	84	14.2798	8.91056	6.38099	0.924385	1.07444
						2012	12	27	361	12.9	-0.3	6.3	61.5	11.9709	12.6413	6.95879	0.983601	1.35071
						2012	12	28	362	10.5	-4.3	3.1	67	11.1829	13.2405	6.88343	0.84376	0.813958
						2012	12	29	363	8.6	-5.3	1.65	76	4.88523	5.43237	2.91415	0.33243	0.231093
						2012	12	30	364	10	-4.1	2.95	75	12.6279	14.2443	7.58684	0.923309	0.832184
						2012	12	31	365	8.8	-1.6	3.6	77.5	6.6215	5.50909	3.41659	0.42882	0.455945
										7.8	-4.8					4.72503
																	1259.62	2556.37
																	ETo-HS	ETo-TURC (Ousman Couly (2016)

## Sheet: 2013
	BATMAN					year	month	day	DOY	Tmax	Tmin	Tmean	RHmean.	Ra	Rs=0.16(Tmax-Tmin)^0.5*Ra	Rs=from meteorological station	ETo-HS	ETo-TURC (Ousman Couly (2016)
	DOY	246					#	#		°C	°C	°C	%	MJ m-2 day-1*(0.408 mm day-1)
	φ (-)	36.71	0.64071			2013	1	1	1	8	-6.6	0.7	70	12.8002	14.9506	7.8255	0.849087	0.235529
	tan(φ)		0.745649			2013	1	2	2	8.5	-6.3	1.1	70.5	5.79551	6.86188	3.56732	0.395433	0.189602
	sin(φ)		0.597765			2013	1	3	3	9.2	-6.5	1.35	65.5	13.5918	17.0714	8.61685	0.967799	0.490461
	cos(φ)		0.801671			2013	1	4	4	7.4	-6.5	0.45	72	14.8663	16.5313	8.86807	0.949205	0.168134
	dr	0.984766		(1+0.033*cos(2*3.14/365*DOY))		2013	1	5	5	5.6	-5.3	0.15	87.5	4.04241	3.52498	2.13537	0.224805	0.0172341
	δ	0.120494		(0.409*sin(2*3.14/365*DOY-1.39))		2013	1	6	6	8.4	3.6	6	82.5	6.84411	2.62814	2.39915	0.33489	0.417892
	tan(δ)	0.121081				2013	1	7	7	8.6	5.7	7.15	77	2.71993	0.631023	0.741099	0.108446	0.272287
	sin(δ)	0.120203				2013	1	8	8	6.8	1.8	4.3	77.5	6.88138	2.75255	2.46196	0.31911	0.334462
	cos(δ)	0.992749				2013	1	9	9	3.5	-0.3	1.6	90	31.1712	9.47604	9.72221	1.1062	0.345588
	X	0.991849				2013	1	10	10	0.6	-6.6	-3	82.5	4.40814	2.53909	1.89252	0.164275	-0.358754		-
	ωs (eq. 25)	1.49314		(acos{(-1*tan(-0.35)*tan(0.409*sin(2*3.14/365*DOY-1.39))))		2013	1	11	11	0.2	-10.2	-5	88	3.27829	2.72754	1.69155	0.126988	-0.746719
	sin ωs	0.996986				2013	1	12	12	0.5	-3.3	-1.4	88.5	25.1303	7.6396	7.83806	0.753912	-0.310489
	sin φ*sin δ	-0.0718532		(sin(0.35)*sin(0.409*sin(2*3.14/365*DOY-1.39)))		2013	1	13	13	5.3	-1.2	2.05	79	8.80671	4.57949	3.59245	0.418233	0.24859
	cos φ*cos δ	0.795859		(cos(0.35)*cos(0.409*sin(2*3.14/365*DOY-1.39))		2013	1	14	14	4.5	-3.8	0.35	84	22.1269	14.6923	10.1995	1.08574	0.118624
	Gsc	0.082				2013	1	15	15	5.3	-6.5	-0.6	80.5	20.9343	19.762	11.5059	1.16069	-0.282255
						2013	1	16	16	6	-7.3	-0.65	70	19.2449	20.4766	11.2295	1.12952	-0.316876
	Ra	25.4105				2013	1	17	17	8.5	-4.8	1.85	63.5	18.1255	19.2856	10.5764	1.2189	0.72753
						2013	1	18	18	9.8	-6.8	1.5	64	2.77468	3.68477	1.80878	0.204744	0.162744
						2013	1	19	19	10.7	-5	2.85	67	4.49759	5.64898	2.85135	0.345333	0.383047
						2013	1	20	20	9.8	2.8	6.3	67.5	1.86937	1.04685	0.791343	0.111854	0.287618
						2013	1	21	21	6.9	-1.6	2.65	89.5	26.6043	18.0909	12.4103	1.48848	0.939299
						2013	1	22	22	12	-2.6	4.7	74	9.41008	10.991	5.75294	0.759172	0.967461
						2013	1	23	23	15.5	6.6	11.05	62	2.26312	1.61134	1.08025	0.182783	0.486716
						2013	1	24	24	13.7	5.8	9.75	74	11.3401	7.16694	5.09977	0.824024	1.13047
						2013	1	25	25	12.1	4	8.05	76.5	7.94427	5.14789	3.61757	0.54846	0.783608
						2013	1	26	26	14.5	2.4	8.45	76	13.1351	12.7148	7.3105	1.1255	1.65378
						2013	1	27	27	14.3	7.5	10.9	80.5	25.8709	14.0738	10.7941	1.81692	2.10878
						2013	1	28	28	9.9	0.8	5.35	90.5	23.0057	16.7482	11.1039	1.50763	1.53529
						2013	1	29	29	15.2	4.9	10.05	68.5	26.6877	21.9906	13.7041	2.23842	2.99494
						2013	1	30	30	11.2	-0.5	5.35	75.5	24.7417	23.1583	13.5408	1.83849	2.0577
						2013	1	31	31	8.5	5.1	6.8	74	41.8948	11.3954	12.36	1.78329	1.304
						2013	2	1	32	7.8	4.8	6.3	83.5	35.8979	8.61549	9.94831	1.40616	0.981588
						2013	2	2	33	9.9	2.2	6.05	65	1.86725	1.15023	0.829026	0.115964	0.288696
						2013	2	3	34	10.1	-3	3.55	65	2.68962	2.81872	1.55756	0.195035	0.291215
						2013	2	4	35	11.9	3.2	7.55	63	29.3398	20.4205	13.8464	2.05865	2.3364
						2013	2	5	36	11.3	-0.2	5.55	66	15.094	13.8864	8.18977	1.12157	1.33759
						2013	2	6	37	13.3	0.2	6.75	70.5	6.00825	6.29665	3.4794	0.500984	0.806854
						2013	2	7	38	9.9	6.1	8	81.5	13.129	3.9912	4.09489	0.619626	0.655712
						2013	2	8	39	13.4	6.1	9.75	78	7.03166	4.10649	3.03976	0.491167	0.756723
						2013	2	9	40	15.6	4.9	10.25	68	18.912	16.1887	9.89807	1.62836	2.30022
						2013	2	10	41	14.2	1.6	7.9	73.5	13.0046	13.1086	7.38587	1.11328	1.62539
						2013	2	11	42	8.6	0.6	4.6	85.5	27.0067	17.2843	12.2219	1.60566	1.40958
						2013	2	12	43	12.8	3	7.9	75.5	19.2348	15.08	9.63429	1.45218	1.83622
						2013	2	13	44	13.4	-1.3	6.05	72	7.37137	8.66873	4.52196	0.632533	0.958575
						2013	2	14	45	13.1	-2.8	5.15	68.5	16.7481	21.3036	10.6852	1.43825	1.85349
						2013	2	15	46	17.5	4	10.75	58.5	19.6574	21.2299	11.5561	1.93502	3.01801
						2013	2	16	47	12	3.8	7.9	73	33.5018	21.9772	15.3495	2.31364	2.57382
						2013	2	17	48	11	2.7	6.85	79.5	32.2912	21.4413	14.8848	2.15193	2.2869
						2013	2	18	49	10.9	1.8	6.35	74	20.811	15.1504	10.0446	1.42272	1.58959
						2013	2	19	50	11.3	3.1	7.2	71	29.8921	19.6092	13.6957	2.00813	2.18165
						2013	2	20	51	10.8	-0.7	5.05	67.5	23.9605	22.0436	13.0006	1.74228	1.88435
						2013	2	21	52	10.9	4.9	7.9	72.5	25.0204	12.0098	9.80595	1.47806	1.50788
						2013	2	22	53	12.5	0.6	6.55	73	29.1983	27.7968	16.1158	2.30154	2.81601
						2013	2	23	54	11.3	6.5	8.9	74.5	46.4038	17.8191	16.2665	2.54726	2.29829
						2013	2	24	55	15.7	2.2	8.95	72	26.5374	28.6604	15.6008	2.44758	3.5623
						2013	2	25	56	16.6	-0.8	7.9	65.5	21.9823	30.5993	14.6712	2.2114	3.4959
						2013	2	26	57	16.9	1.3	9.1	60	21.3475	26.6416	13.4905	2.12838	3.36315
						2013	2	27	58	18.8	1.6	10.2	62.5	16.3741	22.5307	10.8653	1.78429	3.08931
						2013	2	28	59	16.7	7.6	12.15	64.5	27.4819	20.0069	13.2644	2.32998	3.06548
						2013	3	1	60	13.7	6.1	9.9	66.5	27.7368	16.864	12.2344	1.98761	2.33613
						2013	3	2	61	13.4	1.9	7.65	72.5	22.965	21.1278	12.4605	1.85991	2.43095
						2013	3	3	62	14.1	2.2	8.15	65	20.9827	19.9755	11.5812	1.76263	2.40815
						2013	3	4	63	18.6	7.2	12.9	56	26.8013	24.4428	14.4786	2.60696	3.80303
						2013	3	5	64	11	5.4	8.2	76	34.1702	15.3082	12.9378	1.97289	1.90631
						2013	3	6	65	9	1.1	5.05	49	39.4902	24.9578	17.7592	2.38	2.14206
						2013	3	7	66	11.9	-3	4.45	43.5	26.948	32.122	16.6433	2.17189	2.65182
						2013	3	8	67	11.8	-5.9	2.95	57.5	3.82535	5.4167	2.575	0.313375	0.382444
						2013	3	9	68	16.9	-0.7	8.1	54	19.3307	27.2177	12.9755	1.97103	3.18578
						2013	3	10	69	17.4	-1.7	7.85	57.5	17.7927	27.1873	12.4417	1.87169	3.118
						2013	3	11	70	18.4	-1.7	8.35	60	25.4257	40.8845	18.2386	2.79725	4.76401
						2013	3	12	71	19.8	8.1	13.95	64	27.714	25.9403	15.1674	2.82438	4.18711
						2013	3	13	72	21.1	12.1	16.6	60	38.7297	27.8854	18.5903	3.7507	4.88144
						2013	3	14	73	23.9	6.4	15.15	63.5	26.6016	37.2423	17.8052	3.44089	6.12683
						2013	3	15	74	24.6	5.3	14.95	58.5	17.6199	27.2051	12.3851	2.37892	4.53315
						2013	3	16	75	22.9	15.4	19.15	37	38.3652	23.0191	16.8108	3.6431	5.17549
						2013	3	17	76	19.4	7.1	13.25	63	31.7863	31.2777	17.8366	3.2482	4.85161
						2013	3	18	77	12.7	4	8.35	64.5	30.2625	21.0627	14.2819	2.1904	2.56663
						2013	3	19	78	13.8	-2.5	5.65	63	6.86412	8.95082	4.43403	0.609831	0.936465
						2013	3	20	79	16.5	1.5	9	60	31.9999	38.3999	19.8296	3.11686	4.70695
						2013	3	21	80	20.1	-0.4	9.85	59.5	14.2961	23.4456	10.3565	1.67949	3.13775
						2013	3	22	81	20	1.4	10.7	58.5	26.0033	38.6929	17.9434	2.99928	5.26369
						2013	3	23	82	17.1	5.2	11.15	62.5	30.2679	28.815	16.7061	2.83656	4.08502
						2013	3	24	83	13.6	1	7.3	62.5	28.7074	28.937	16.3042	2.40016	3.14862
						2013	3	25	84	16	-2.8	6.6	59.5	23.1034	34.7475	16.0278	2.29368	3.48933
						2013	3	26	85	15.5	0.4	7.95	68.5	18.6676	22.5504	11.6064	1.75284	2.64603
						2013	3	27	86	20	5.3	12.65	58	27.9293	32.8448	17.1332	3.05981	4.95468
						2013	3	28	87	19.6	1.9	10.75	68.5	23.2693	32.9494	15.6636	2.6228	4.53471
						2013	3	29	88	20.5	6.9	13.7	62.5	30.6228	33.3176	18.069	3.3382	5.23958
						2013	3	30	89	20.1	8.2	14.15	66.5	38.3242	36.4846	21.1527	3.96374	5.80472
						2013	3	31	90	22	3.4	12.7	61	26.3036	39.1398	18.1506	3.24683	5.85999
						2013	4	1	91	24.9	4.3	14.6	60.5	14.8812	24.5242	10.8066	2.05354	4.06945
						2013	4	2	92	25.5	5.7	15.6	59	4.25196	6.7351	3.0272	0.593001	1.39471
						2013	4	3	93	25.8	9.4	17.6	48.5	10.6072	13.9167	6.87296	1.42697	2.73632
						2013	4	4	94	26	4.9	15.45	58.5	25.4995	43.0432	18.741	3.65471	7.09903
						2013	4	5	95	22.2	10.2	16.2	66	12.0566	11.5743	6.68245	1.33255	2.19943
						2013	4	6	96	26.3	7.8	17.05	61.5	22.3591	33.0915	15.3872	3.14508	5.80193
						2013	4	7	97	29	6.6	17.8	57.5	20.9666	37.5721	15.8771	3.31504	6.67242
						2013	4	8	98	29	7.9	18.45	52	29.2766	49.4189	21.517	4.57465	8.80732
						2013	4	9	99	23.3	11	17.15	49	25.7872	25.3746	14.4703	2.96614	4.60658
						2013	4	10	100	17.6	8.7	13.15	73	37.9994	27.0556	18.1381	3.29246	4.22067
						2013	4	11	101	19.3	9.8	14.55	71.5	25.0972	19.0739	12.3768	2.34828	3.23045
						2013	4	12	102	23.1	7	15.05	63.5	35.1788	45.3103	22.5847	4.35128	7.35927
						2013	4	13	103	23.1	4.8	13.95	59	30.6567	44.8814	20.9832	3.90735	7.0165
						2013	4	14	104	24.7	2.3	13.5	55	25.8433	46.3112	19.57	3.59256	7.10733
						2013	4	15	105	23.2	5.6	14.4	60	8.87005	12.489	5.95391	1.12441	2.21363
						2013	4	16	106	21.7	7.4	14.55	57.5	33.5073	38.3324	20.2735	3.84654	6.17006
						2013	4	17	107	19.2	6.8	13	66	31.5836	31.3309	17.7948	3.21448	4.81022
						2013	4	18	108	19	7.6	13.3	70	37.3652	34.0771	20.1855	3.68187	5.26915
						2013	4	19	109	18.9	4.5	11.7	70	34.3217	39.5387	20.8387	3.60546	5.65495
						2013	4	20	110	19.8	6.9	13.35	64.5	37.3115	38.5055	21.4416	3.91727	5.92608
						2013	4	21	111	19.5	1.9	10.7	63.5	27.7766	39.1095	18.6447	3.11651	5.31746
						2013	4	22	112	15.6	6.7	11.15	77.5	46.5519	33.1449	22.2204	3.77284	4.65734
						2013	4	23	113	20.9	4.6	12.75	61	24.8509	32.4055	16.053	2.8763	4.91328
						2013	4	24	114	20.6	0.4	10.5	53.5	21.188	34.2398	15.2365	2.52895	4.63739
						2013	4	25	115	22.9	-1.1	10.9	56.5	6.86939	13.1892	5.38448	0.906346	1.99338
						2013	4	26	116	25.7	2.2	13.95	55.5	27.5308	51.758	21.3537	3.97635	8.04371
						2013	4	27	117	26.8	3.7	15.25	53.5	31.77	58.711	24.4311	4.73569	9.50205
						2013	4	28	118	29	4.6	16.8	53	24.6185	48.0552	19.457	3.94839	8.21246
						2013	4	29	119	30.9	5.4	18.15	51	24.1438	49.2533	19.5072	4.11304	8.71443
						2013	4	30	120	31.7	13	22.35	47.5	28.321	42.3682	19.5952	4.61426	8.54162
						2013	5	1	121	31.5	8.4	19.95	52	29.2872	54.1228	22.5219	4.98643	9.94702
						2013	5	2	122	31.1	7.2	19.15	51.5	22.241	42.5249	17.397	3.77013	7.75567
						2013	5	3	123	31	7.7	19.35	50	19.0126	35.4394	14.6838	3.19938	6.55372
						2013	5	4	124	30.7	9.5	20.1	51	33.453	56.7363	24.6447	5.47811	10.4429
						2013	5	5	125	31.2	8.2	19.7	53	22.481	41.3651	17.2504	3.79402	7.64785
						2013	5	6	126	31.3	9.6	20.45	54	17.9989	31.2461	13.4151	3.0095	5.96147
						2013	5	7	127	28.1	12.8	20.45	59	30.7079	37.5865	19.2183	4.31137	7.09531
						2013	5	8	128	29.4	17.8	23.6	44.5	37.0417	34.3747	20.1855	4.90127	7.45432
						2013	5	9	129	27.5	12	19.75	62	40.3066	49.9802	25.39	5.59165	9.1741
						2013	5	10	130	26.4	14.1	20.25	66	44.7135	43.9981	25.0906	5.5993	8.2076
						2013	5	11	131	20.9	12.5	16.7	78.5	49.8044	33.4685	23.0955	4.6732	5.80715
						2013	5	12	132	21.2	7	14.1	72	40.2397	45.7123	24.2616	4.53918	7.1802
						2013	5	13	133	19.7	8.4	14.05	77.5	43.4155	39.2476	23.3509	4.36195	6.19779
						2013	5	14	134	21	8.2	14.6	72.5	45.1371	46.2204	25.838	4.90989	7.38692
						2013	5	15	135	22	5.9	13.95	69.5	39.6691	51.0938	25.4674	4.74239	7.9445
						2013	5	16	136	22.9	9.1	16	66.5	37.3846	41.2726	22.2204	4.40491	6.93801
						2013	5	17	137	26.4	6.7	16.55	61	36.4897	57.5078	25.9133	5.22057	9.69149
						2013	5	18	138	28.3	9.7	19	61	31.1639	46.3719	21.5044	4.64134	8.3953
						2013	5	19	139	27.9	7.7	17.8	59	35.7674	57.8002	25.7207	5.37034	10.0754
						2013	5	20	140	29.1	9.1	19.1	58.5	31.1768	49.883	22.3083	4.82794	9.0244
						2013	5	21	141	22.3	13.5	17.9	71.5	53.5111	37.6718	25.3983	5.31792	6.70633
						2013	5	22	142	29.4	9.5	19.45	60.5	34.4228	54.8011	24.5693	5.36769	9.95719
						2013	5	23	143	31.5	11.1	21.3	54	33.3726	54.4641	24.1171	5.53057	10.2872
						2013	5	24	144	33.5	12.2	22.85	54	33.8167	57.6236	24.9713	5.95346	11.1752
						2013	5	25	145	30.3	17.1	23.7	54.5	40.969	43.2633	23.8157	5.79667	8.61009
						2013	5	26	146	30.2	9.9	20.05	55	20.5956	33.4472	14.8471	3.29591	6.3019
						2013	5	27	147	32.4	9.6	21	52	31.2714	57.039	23.891	5.43669	10.6925
						2013	5	28	148	29.5	11.6	20.55	51	35.2187	50.4332	23.8408	5.36233	9.41208
						2013	5	29	149	30.2	8.1	19.15	53.5	34.1508	60.3787	25.6872	5.56673	10.8593
						2013	5	30	150	31.6	8.9	20.25	49	32.5595	59.1281	24.8205	5.53903	11.0578
						2013	5	31	151	33.5	12.4	22.95	45	33.968	57.338	24.965	5.9666	11.9368
						2013	6	1	152	35.4	12.6	24	43.5	27.4625	50.0916	20.9811	5.14365	10.879
						2013	6	2	153	32.6	9.5	21.05	48.5	27.7845	51.3458	21.3663	4.86841	9.87981
						2013	6	3	154	36.6	11.4	24	41	29.7581	59.9923	23.9015	5.85962	13.3661
						2013	6	4	155	33.8	10.1	21.95	40.5	30.5859	57.9908	23.824	5.55419	12.5657
						2013	6	5	156	34	9.7	21.85	40	30.5935	59.4737	24.1297	5.61129	12.9328
						2013	6	6	157	32.6	11.3	21.95	40	32.694	55.7105	24.1422	5.62837	12.1648
						2013	6	7	158	31	10.9	20.95	41.5	38.4537	61.8336	27.584	6.26897	12.9503
						2013	6	8	159	31.5	8.9	20.2	42	33.6058	60.7593	25.5616	5.69692	12.4585
						2013	6	9	160	33.1	11	22.05	39.5	35.1027	62.0616	26.4032	6.17097	13.6109
						2013	6	10	161	32.5	15.6	24.05	47	41.7456	56.4401	27.4583	6.73966	11.6536
						2013	6	11	162	33.1	14.4	23.75	46.5	38.3846	57.4233	26.5581	6.47197	11.8729
						2013	6	12	163	34.7	11.6	23.15	45	34.7919	64.2954	26.7549	6.42578	13.3799
						2013	6	13	164	36.6	12.7	24.65	34	33.6747	64.386	26.3404	6.55795	15.7399
						2013	6	14	165	36.6	13.3	24.95	33.5	32.902	61.3293	25.4109	6.37124	15.1724
						2013	6	15	166	36.6	11.4	24	31.5	33.5088	67.5537	26.914	6.59816	16.7971
						2013	6	16	167	35.6	11.3	23.45	34.5	34.9253	67.8947	27.5463	6.6643	16.1614
						2013	6	17	168	36.6	13.4	25	31.5	35.8034	66.4511	27.5923	6.92628	16.7895
						2013	6	18	169	36.3	16.5	26.4	32	37.5736	59.5166	26.7507	6.93468	15.3101
						2013	6	19	170	31.6	22.4	27	34.5	55.0785	40.5378	26.7298	7.02331	10.3762
						2013	6	20	171	35.2	15.2	25.2	38	37.1746	59.4794	26.6	6.70839	14.0158
						2013	6	21	172	34.9	15.5	25.2	35	36.9846	57.4002	26.0641	6.57323	14.0379
						2013	6	22	173	35.6	14.7	25.15	31	33.864	56.6206	24.7703	6.23968	14.4951
						2013	6	23	174	36.8	13	24.9	26	35.081	66.7943	27.383	6.85767	17.8953
						2013	6	24	175	36.6	15.1	25.85	20	30.9331	53.2049	22.9489	5.8751	15.4959
						2013	6	25	176	36.9	16.4	26.65	23	33.9674	55.7065	24.607	6.41503	15.8862
						2013	6	26	177	36.6	15.5	26.05	24	33.1562	55.9677	24.3683	6.26706	15.6635
						2013	6	27	178	36.8	17.7	27.25	23	35.1812	53.7569	24.6007	6.49996	15.473
						2013	6	28	179	36.6	21.2	28.9	24.5	39.2503	48.3564	24.6447	6.75007	14.0453
						2013	6	29	180	37.3	17.8	27.55	25.5	34.4719	53.7761	24.3558	6.4781	15.1379
						2013	6	30	181	37.5	17.2	27.35	22	33.0365	53.6513	23.8157	6.3065	15.6232
						2013	7	1	182	37.3	18.6	27.95	22	31.2075	46.6865	21.5924	5.79374	13.7759
						2013	7	2	183	37.2	17.1	27.15	30	31.2393	50.2328	22.4088	5.90768	13.4329
						2013	7	3	184	37.2	17.4	27.3	27.5	25.1353	39.8144	17.8952	4.7335	11.0787
						2013	7	4	185	37.2	18.1	27.65	25.5	33.7891	51.6297	23.6272	6.29818	14.5749
						2013	7	5	186	37.2	17.8	27.5	22	35.9865	55.8511	25.3607	6.73793	16.2712
						2013	7	6	187	37.2	16.6	26.9	20.5	34.1962	56.3553	24.8331	6.51038	16.5339
						2013	7	7	188	37.2	16.7	26.95	19	30.0487	49.2799	21.7682	5.71326	14.7612
						2013	7	8	189	37.3	18.1	27.7	18.5	35.618	54.7093	24.9713	6.66377	16.5625
						2013	7	9	190	37.2	17	27.1	18.5	36.0527	58.2612	25.9259	6.82729	17.4624
						2013	7	10	191	37.2	20.4	28.8	21.5	38.3837	51.5877	25.1722	6.8798	15.3962
						2013	7	11	192	38.7	22.3	30.5	21.5	39.2949	51.5549	25.4611	7.21262	15.6862
						2013	7	12	193	37.2	22.3	29.75	22	38.4187	45.7951	23.7277	6.61721	13.8161
						2013	7	13	194	37.2	20.5	28.85	20	36.635	48.9444	23.9538	6.55382	14.8697
						2013	7	14	195	37.5	20.8	29.15	20	35.9627	48.0461	23.5142	6.47491	14.6596
						2013	7	15	196	37.2	19.4	28.3	20	31.9309	45.4696	21.5547	5.82788	13.7658
						2013	7	16	197	37.7	19.7	28.7	18.5	34.066	49.0551	23.1248	6.30665	15.0985
						2013	7	17	198	37.2	20.5	28.85	19.5	36.4237	48.6621	23.8157	6.51602	14.8614
						2013	7	18	199	37.2	21.1	29.15	25	36.4114	46.8979	23.376	6.43686	13.6077
						2013	7	19	200	37.2	20	28.6	28.5	36.9126	50.7917	24.4939	6.66569	14.0563
						2013	7	20	201	37.2	20	28.6	27.5	36.3826	50.0624	24.1422	6.56997	14.0139
						2013	7	21	202	37.2	20.2	28.7	21	35.9676	48.916	23.7277	6.47109	14.6866
						2013	7	22	203	37.2	20.9	29.05	22.5	35.5846	46.4023	22.9866	6.31616	13.8083
						2013	7	23	204	37.2	20.8	29	20	35.7279	46.875	23.1499	6.35424	14.2921
						2013	7	24	205	37.2	21.1	29.15	23.5	36.0005	46.3687	23.1122	6.36423	13.6732
						2013	7	25	206	37.2	19.4	28.3	21.5	34.1266	48.5963	23.0369	6.22863	14.4507
						2013	7	26	207	37.2	23	30.1	19.5	31.5418	35.8314	19.0174	5.34261	11.2643
						2013	7	27	208	37.2	18.3	27.75	20.5	25.8834	39.1356	18.0041	4.80981	11.7918
						2013	7	28	209	37.2	21.1	29.15	23	27.0787	34.8773	17.3844	4.78701	10.4848
						2013	7	29	210	36.9	17.1	27	26.5	22.7006	35.9578	16.1618	4.24655	10.1279
						2013	7	30	211	37.2	15.5	26.35	23.5	29.0207	50.3799	21.63	5.60088	14.2891
						2013	7	31	212	37.2	14.1	25.65	24	29.6303	54.7567	22.7857	5.80657	15.2499
						2013	8	1	213	38	15.2	26.6	16.5	20.5517	37.4862	15.7012	4.0887	11.5992
						2013	8	2	214	38	15.8	26.9	17	26.6009	47.2432	20.0536	5.25737	14.447
						2013	8	3	215	38	16.2	27.1	17.5	26.1461	45.5987	19.5324	5.14362	13.9345
						2013	8	4	216	38	18.3	28.15	22	27.0799	42.6778	19.2309	5.18266	12.6752
						2013	8	5	217	38	16.1	27.05	24.5	27.4284	48.0545	20.5372	5.40222	13.6424
						2013	8	6	218	38	18.5	28.25	23.5	30.134	47.009	21.2909	5.75031	13.7055
						2013	8	7	219	38	16.7	27.35	21	27.4378	46.754	20.2609	5.36518	13.8297
						2013	8	8	220	38	16.7	27.35	21	28.7986	49.0728	21.2658	5.63128	14.4863
						2013	8	9	221	38	22.9	30.45	21.5	32.2642	38.9751	20.0599	5.67668	12.0013
						2013	8	10	222	38	18.7	28.35	24.5	30.665	47.3467	21.5547	5.8342	13.6735
						2013	8	11	223	38	19.6	28.8	20	30.9851	45.61	21.2658	5.81213	13.8899
						2013	8	12	224	38	19	28.5	21	30.9602	47.0595	21.5924	5.86339	14.118
						2013	8	13	225	38	19	28.5	21	30.4108	46.2245	21.2092	5.75936	13.8782
						2013	8	14	226	38	17.7	27.85	20.5	28.7676	46.7185	20.7382	5.55239	13.9784
						2013	8	15	227	38	17.5	27.75	23	28.2628	46.351	20.4744	5.46976	13.5075
						2013	8	16	228	38	23.5	30.75	20	32.1415	37.2842	19.5826	5.57606	11.72
						2013	8	17	229	38	18.2	28.1	14.5	28.2993	44.8261	20.1478	5.42387	14.2912
						2013	8	18	230	38	16.4	27.2	21	25.304	43.7253	18.8164	4.96611	12.9469
						2013	8	19	231	38	18	28	23.5	27.6835	44.2936	19.8087	5.32095	12.9076
						2013	8	20	232	38	31.1	34.55	22.5	48.8948	26.9899	20.5498	6.30946	8.7552
						2013	8	21	233	38.4	20.9	29.65	24	30.6834	42.9567	20.5372	5.71539	12.7175
						2013	8	22	234	38	22.2	30.1	31	32.7066	41.3412	20.801	5.8437	11.4247
						2013	8	23	235	38	18.9	28.45	28	29.3701	44.8775	20.5372	5.57085	12.5297
						2013	8	24	236	38	20.3	29.15	23.5	30.4909	43.1751	20.5247	5.65171	12.7721
						2013	8	25	237	38	20	29	20.5	29.7916	42.8999	20.2232	5.55091	13.0661
						2013	8	26	238	38	19	28.5	19.5	27.7723	42.2139	19.3691	5.25966	12.9189
						2013	8	27	239	38	18.5	28.25	18.5	26.2939	41.0185	18.5777	5.01753	12.6568
						2013	8	28	240	38	17.9	27.95	19.5	25.6358	41.2224	18.3893	4.93429	12.5447
						2013	8	29	241	38	19.9	28.95	22.5	27.5133	39.8392	18.7285	5.13513	11.9255
						2013	8	30	242	38	20.7	29.35	20.5	21.555	29.8321	14.3447	3.9668	9.30877
						2013	8	31	243	38	19.5	28.75	21	25.6628	37.9809	17.6608	4.82167	11.5448
						2013	9	1	244	37.7	18.1	27.9	28.5	20.9247	32.8099	14.822	3.97274	9.19719
						2013	9	2	245	37.7	18.7	28.2	22.5	26.0433	39.5858	18.1632	4.90025	11.7467
						2013	9	3	246	37.7	16.8	27.25	25.5	23.801	39.7952	17.4095	4.59992	11.3057
						2013	9	4	247	37.7	18.2	27.95	20.5	24.0005	37.4408	16.9573	4.55006	11.3355
						2013	9	5	248	32.6	20	26.3	23.5	25.2683	25.4704	14.3509	3.71182	7.50036
						2013	9	6	249	33.2	10.3	21.75	21	17.6686	32.3689	13.5282	3.13801	8.94133
						2013	9	7	250	34.3	10.5	22.4	25.5	18.6831	35.5725	14.5833	3.43835	9.44021
						2013	9	8	251	34.6	12.1	23.35	22.5	20.5889	37.06	15.6259	3.77123	10.2925
						2013	9	9	252	35.3	14.1	24.7	18	21.3642	36.2337	15.7389	3.92313	10.7706
						2013	9	10	253	33.3	16.8	25.05	18.5	20.5832	27.1698	13.3775	3.36196	8.22632
						2013	9	11	254	34.7	11	22.85	17	21.093	39.9923	16.4298	3.91706	11.5883
						2013	9	12	255	35.7	12.8	24.25	17	21.6223	39.6121	16.5554	4.08295	11.7525
						2013	9	13	256	35.5	12	23.75	26.5	20.3728	38.3009	15.8017	3.85074	10.2506
						2013	9	14	257	37.7	13.1	25.4	25.5	20.0071	39.3739	15.8771	4.02275	10.9098
						2013	9	15	258	37.7	14.5	26.1	38.5	18.1082	33.6087	13.9553	3.59311	8.18225
						2013	9	16	259	34.9	15.7	25.3	38.5	19.6186	30.1342	13.7543	3.47683	7.3016
						2013	9	17	260	34.3	13.9	24.1	49	20.2843	33.104	14.6587	3.60228	6.82073
						2013	9	18	261	31.8	17.3	24.55	35.5	23.6886	27.4788	14.4326	3.58481	6.86846
						2013	9	19	262	32.1	16.7	24.4	40.5	23.8863	29.4279	14.9978	3.71201	6.87197
						2013	9	20	263	32.1	16.5	24.3	35	17.7796	22.189	11.2358	2.77431	5.65101
						2013	9	21	264	33.9	15	24.45	25.5	15.3946	23.2766	10.7083	2.65346	6.57945
						2013	9	22	265	29.6	17.5	23.55	30.5	22.7721	22.0434	12.674	3.07368	5.84348
						2013	9	23	266	29.4	16.7	23.05	30	15.729	15.9806	8.96855	2.14873	4.36311
						2013	9	24	267	28.1	13.6	20.85	22	24.2865	28.1724	14.7969	3.35419	7.63853
						2013	9	25	268	37.7	8.5	23.1	22.5	14.659	34.2434	12.674	3.04023	9.51177
						2013	9	26	269	30.2	9.2	19.7	33.5	13.945	23.4276	10.2247	2.24878	5.54954
						2013	9	27	270	31.6	8.5	20.05	27	19.5357	36.102	15.023	3.33495	8.99799
						2013	9	28	271	32.6	10.3	21.45	23.5	19.2846	34.4037	14.5708	3.35421	9.17779
						2013	9	29	272	31.2	12.8	22	30	18.8875	27.8024	12.963	3.0259	7.08416
						2013	9	30	273	31.6	10.5	21.05	27.5	18.1334	30.6091	13.3272	3.03668	7.82147
						2013	10	1	274	32.1	10.1	21.1	52.5	6.4105	11.2825	4.81086	1.09759	2.42297
						2013	10	2	275	31.4	13.6	22.5	31	18.5799	26.4577	12.5422	2.96446	6.75113
						2013	10	3	276	32.9	19.7	26.3	37	7.10908	7.50718	4.13257	1.06887	2.24642
						2013	10	4	277	25.4	13.9	19.65	40	7.31547	6.73023	3.96928	0.871829	1.77212
						2013	10	5	278	22.9	9.6	16.25	30.5	11.9043	12.6662	6.94623	1.38719	3.04133
						2013	10	6	279	18.6	5.1	11.85	24	12.9269	13.961	7.5994	1.32152	3.0117
						2013	10	7	280	22	1.5	11.75	25	7.76793	12.7394	5.62733	0.975276	2.74047
						2013	10	8	281	22.7	3.8	13.25	23	5.94113	8.98299	4.13257	0.752575	2.23099
						2013	10	9	282	26.3	9.2	17.75	21	17.5799	24.0493	11.6315	2.42517	6.21127
						2013	10	10	283	27.9	4.7	16.3	22	11.0344	20.4799	8.5038	1.70073	5.10108
						2013	10	11	284	29.9	4.6	17.25	21.5	4.7604	9.63506	3.8311	0.787554	2.73574
						2013	10	12	285	30.4	6	18.2	26	12.3966	24.1982	9.79758	2.06866	5.9991
						2013	10	13	286	29.5	5.7	17.6	23	13.0991	24.9406	10.2247	2.12285	6.26883
						2013	10	14	287	29.9	8.6	19.25	20.5	15.3944	26.2321	11.3677	2.47018	7.01426
						2013	10	15	288	29.6	11.1	20.35	20.5	17.1389	25.3656	11.7948	2.63908	6.96455
						2013	10	16	289	30.6	7.5	19.05	44	14.3251	26.4728	11.016	2.38084	5.37843
						2013	10	17	290	29.7	6.8	18.25	37.5	12.6486	23.1722	9.68453	2.04763	5.06593
						2013	10	18	291	30.3	13.6	21.95	32	14.9268	19.9422	9.7599	2.27536	5.10064
						2013	10	19	292	26	14	20	28.5	15.66	15.0336	8.67965	1.92425	3.96499
						2013	10	20	293	23	12.2	17.6	26	11.4666	9.90712	6.02928	1.25181	2.69627
						2013	10	21	294	24.4	3.5	13.95	23.5	13.0167	21.7639	9.52124	1.77299	4.9122
						2013	10	22	295	25.1	3.5	14.3	34.5	12.3986	21.4248	9.21977	1.73577	4.3455
						2013	10	23	296	26.6	3.7	15.15	38.5	11.3525	20.7978	8.69221	1.67979	4.15099
						2013	10	24	297	25.4	7.6	16.5	47	12.8021	18.2303	8.64197	1.7385	3.44103
						2013	10	25	298	24.6	11	17.8	40	16.2215	17.6489	9.57148	1.99847	3.7951
						2013	10	26	299	24.4	12.7	18.55	31.5	18.6825	17.4868	10.2247	2.17982	4.2423
						2013	10	27	300	23.5	5.2	14.35	28.5	13.5345	19.8144	9.26374	1.74677	4.33971
						2013	10	28	301	24	4.7	14.35	28	11.6155	17.9344	8.16465	1.53952	3.98891
						2013	10	29	302	24.4	3.7	14.05	27	11.3539	18.8021	8.26514	1.54393	4.16158
						2013	10	30	303	24.3	3	13.65	29.5	12.4516	21.2175	9.19465	1.69599	4.45058
						2013	10	31	304	25.5	4.2	14.85	28.5	11.2949	19.2465	8.3405	1.59714	4.30121
						2013	11	1	305	24.7	3.1	13.9	30	13.1081	22.6508	9.74734	1.81223	4.74282
						2013	11	2	306	24.2	4.1	14.15	29.5	11.2069	18.0207	8.03904	1.50641	3.91253
						2013	11	3	307	23.5	4.1	13.8	22	11.3717	17.6488	8.01392	1.48525	4.10485
						2013	11	4	308	24.1	4.2	14.15	58	12.319	19.6119	8.7927	1.64764	3.2657
						2013	11	5	309	12.8	5.8	9.3	85.5	17.9222	10.0365	7.58684	1.20586	1.43871
						2013	11	6	310	23.6	5.4	14.5	75	11.6302	16.9335	7.93855	1.50388	2.89867
						2013	11	7	311	24.5	17.5	21	79.5	18.1003	10.1362	7.66221	1.74363	2.2109
						2013	11	8	312	19.5	11	15.25	92	17.3413	11.7921	8.08928	1.56801	2.1695
						2013	11	9	313	16	12.6	14.3	96	18.1374	4.93337	5.35099	1.00741	1.06261
						2013	11	10	314	18.8	9.5	14.15	71	16.0638	11.9514	7.83806	1.46875	2.11296
						2013	11	11	315	17.1	10.4	13.75	74.5	19.9569	10.6969	8.26514	1.52939	1.8958
						2013	11	12	316	12.2	8.1	10.15	72	28.3807	9.30888	9.19465	1.50725	1.42611
						2013	11	13	317	11.9	5.4	8.65	71	20.4463	10.6321	8.3405	1.29386	1.44247
						2013	11	14	318	19.1	4.2	11.65	71	15.7824	18.8126	9.74734	1.6836	2.83264
						2013	11	15	319	18.2	5.1	11.65	75	13.8819	14.5482	8.03904	1.38854	2.25474
						2013	11	16	320	18.2	4.7	11.45	67.5	13.632	14.7225	8.01392	1.3748	2.25618
						2013	11	17	321	17.4	3.6	10.5	71	14.7932	16.3317	8.7927	1.45941	2.35148
						2013	11	18	322	17	3.4	10.2	63	12.8579	13.9894	7.58684	1.24591	2.01759
						2013	11	19	323	16.9	1.8	9.35	63.5	12.7683	15.4241	7.93855	1.26409	2.08479
						2013	11	20	324	19.3	3.6	11.45	66.5	12.086	15.1801	7.66221	1.31446	2.31759
						2013	11	21	325	17.1	6.7	11.9	72.5	15.6774	13.0436	8.08928	1.40908	2.07538
						2013	11	22	326	18.8	1.5	10.15	80.5	8.04064	11.1282	5.35099	0.87717	1.65373
						2013	11	23	327	17.8	1.2	9.5	69	12.0236	15.9674	7.83806	1.25499	2.17057
						2013	11	24	328	17.5	2.7	10.1	75	15.8356	18.7494	9.74734	1.59499	2.59953
						2013	11	25	329	16.4	6.7	11.55	86	16.1324	12.5187	8.03904	1.38382	1.97011
						2013	11	26	330	14.6	3.6	9.1	63.5	15.1018	13.2896	8.01392	1.26434	1.80024
						2013	11	27	331	16.8	9.2	13	67.5	19.934	12.1199	8.7927	1.58833	2.04521
						2013	11	28	332	17.6	8	12.8	69	15.304	11.7535	7.58684	1.3616	1.97593
						2013	11	29	333	12.4	3.9	8.15	71.5	17.7182	12.0484	8.26514	1.25793	1.54301
						2013	11	30	334	13.1	1.5	7.3	44	16.8728	15.6579	9.19465	1.35356	1.95543
						2013	12	1	335	10.5	-2.3	4.1	72	14.5703	14.9199	8.3405	1.07128	1.13192
						2013	12	2	336	11.8	1.8	6.8	83	19.2649	15.4119	9.74734	1.40634	1.69238
						2013	12	3	337	12.2	3.2	7.7	84.5	16.748	12.0586	8.03904	1.2023	1.48778
						2013	12	4	338	9.4	-0.6	4.4	74.5	15.8389	12.6711	8.01392	1.04344	1.03784
						2013	12	5	339	5.8	3.1	4.45	54	33.4442	7.22394	8.7927	1.14741	0.660595
						2013	12	6	340	8	2.6	5.3	58	20.4054	8.81512	7.58684	1.02788	0.882616
						2013	12	7	341	9	1.3	5.15	75.5	17.8803	11.0143	7.93855	1.06854	1.03826
						2013	12	8	342	10.7	0.9	5.8	89	15.2975	11.9933	7.66221	1.06056	1.21739
						2013	12	9	343	4	-3.5	0.25	88.5	18.4612	11.0767	8.08928	0.856358	0.0669128
						2013	12	10	344	5	-7.3	-1.15	93.5	9.53589	9.38332	5.35099	0.522536	-0.295324
						2013	12	11	345	1.6	-1.6	0	86	27.3851	7.01058	7.83806	0.81827	0
						2013	12	12	346	1.4	-1.9	-0.25	89	33.5358	8.85346	9.74734	1.0033	-0.0574995
						2013	12	13	347	1.9	-4	-1.05	94	20.6851	9.76338	8.03904	0.789745	-0.276579
						2013	12	14	348	1.5	-4.1	-1.3	94	21.1656	9.4822	8.01392	0.775527	-0.340408
						2013	12	15	349	0.1	-4.1	-2	91.5	26.815	9.00984	8.7927	0.814793	-0.529377
						2013	12	16	350	-2.7	-5	-3.85	91	31.2664	5.75301	7.58684	0.620731	-0.839519
						2013	12	17	351	-4	-6	-5	91.5	40.635	6.5016	9.19465	0.690261	-1.3317
						2013	12	18	352	-5.5	-8.5	-7	82	30.0962	7.22309	8.3405	0.528304	-2.52618
						2013	12	19	353	-6.2	-12.4	-9.3	75.5	24.4664	12.1353	9.74734	0.485929	-7.19502
						2013	12	20	354	-6.2	-13.4	-9.8	82	18.7248	10.7855	8.03904	0.377192	-7.52227
						2013	12	21	355	-5.1	-14	-9.55	79.5	16.7892	11.9539	8.01392	0.387763	-7.62881
						2013	12	22	356	-1.8	-15.8	-8.8	77	14.6872	16.4496	8.7927	0.464123	-8.15744
						2013	12	23	357	-1.7	-14.5	-8.1	84	13.2537	13.5718	7.58684	0.431619	-5.69952
						2013	12	24	358	-6	-13	-9.5	89	18.7531	10.5017	7.93855	0.386445	-6.74229
						2013	12	25	359	-4.3	-15.1	-9.7	82	14.5721	12.5903	7.66221	0.364005	-8.32899
						2013	12	26	360	-0.6	-13.5	-7.05	93	14.0765	14.527	8.08928	0.510019	-4.5681
						2013	12	27	361	2.3	-9.3	-3.5	77	9.8194	9.1124	5.35099	0.448785	-1.05692
						2013	12	28	362	-0.8	-11.4	-6.1	84	15.0465	12.7594	7.83806	0.537852	-3.15509
						2013	12	29	363	-2.6	-12.8	-7.7	89	15.6828	12.7972	8.01392	0.474716	-4.86791
						2013	12	30	364	3.8	-4.1	-0.15	82	19.5519	12.3568	8.7927	0.910196	-0.0452374
						2013	12	31	365	3.1	0.4	1.75	93	28.8575	6.23323	7.58684	0.869913	0.269573
																	1100.93	2215.96
																	ETo-HS	ETo-TURC (Ousman Couly (2016)

## Sheet: 2014
	BATMAN					year	month	day	DOY	Tmax	Tmin	Tmean	RHmean.	Ra	Rs=0.16(Tmax-Tmin)^0.5*Ra	Rs=from meteorological station	ETo-HS	ETo-TURC (Ousman Couly (2016)
	DOY	246					#	#		°C	°C	°C	%	MJ m-2 day-1*(0.408 mm day-1)
	φ (-)	36.71	0.64071			2014	1	1	1	2.3	-0.5	0.9	97	25.0534	5.61196	6.70757	0.735657	0.135148
	tan(φ)		0.745649			2014	1	2	2	1.3	-1.8	-0.25	98	21.7592	5.39629	6.12977	0.630942	-0.0393347
	sin(φ)		0.597765			2014	1	3	3	6.6	-0.9	2.85	85	11.6672	7.00034	5.11233	0.619165	0.449934
	cos(φ)		0.801671			2014	1	4	4	2.7	-3.6	-0.45	97.5	6.5683	3.31043	2.63781	0.268418	-0.0517773
	dr	0.984766		(1+0.033*cos(2*3.14/365*DOY))		2014	1	5	5	0.3	-3.3	-1.5	97.5	27.8463	8.01974	8.45355	0.808155	-0.348225
	δ	0.120494		(0.409*sin(2*3.14/365*DOY-1.39))		2014	1	6	6	4.1	-3.4	0.35	83.5	20.1238	12.0743	8.81782	0.938655	0.100119
	tan(δ)	0.121081				2014	1	7	7	12.2	-6.6	2.8	63	11.8052	17.755	8.18977	0.98948	0.967723
	sin(δ)	0.120203				2014	1	8	8	9.8	-6.7	1.55	63	8.38788	11.072	5.45147	0.618676	0.382135
	cos(δ)	0.992749				2014	1	9	9	9.9	-6.5	1.7	69	12.2518	16.0743	7.93855	0.907912	0.57321
	X	0.991849				2014	1	10	10	9.9	-1.6	4.15	69	12.64	11.6288	6.85831	0.882916	0.921633		-
	ωs (eq. 25)	1.49314		(acos{(-1*tan(-0.35)*tan(0.409*sin(2*3.14/365*DOY-1.39))))		2014	1	11	11	9.9	-6.9	1.5	64	14.3652	19.3068	9.42075	1.06638	0.603001
	sin ωs	0.996986				2014	1	12	12	10.8	-6.8	2	62.5	13.3862	18.8477	8.9853	1.04344	0.763611
	sin φ*sin δ	-0.0718532		(sin(0.35)*sin(0.409*sin(2*3.14/365*DOY-1.39)))		2014	1	13	13	4.6	-2.7	0.95	84.5	21.5308	12.574	9.3077	1.02356	0.270756
	cos φ*cos δ	0.795859		(cos(0.35)*cos(0.409*sin(2*3.14/365*DOY-1.39))		2014	1	14	14	9.6	1.5	5.55	82.5	21.9203	14.2044	9.98181	1.36699	1.36421
	Gsc	0.082				2014	1	15	15	7.7	0.9	4.3	88	22.8503	12.4306	9.5338	1.23574	1.0029
						2014	1	16	16	7.7	-3.9	1.9	81.5	6.42333	5.96085	3.50033	0.40443	0.280589
	Ra	25.4105				2014	1	17	17	8.2	-2.9	2.65	88.5	16.3767	14.5425	8.72989	1.04706	0.774144
						2014	1	18	18	14.8	-4.8	5	62.5	15.1083	23.6898	10.702	1.43109	1.99794
						2014	1	19	19	14.4	-3.1	5.65	61.5	13.8372	19.3721	9.26164	1.27379	1.82038
						2014	1	20	20	15.2	-3.7	5.75	64.5	14.0252	21.2061	9.75571	1.34747	2.00121
						2014	1	21	21	14.6	-2.8	5.9	67.5	15.0187	20.906	10.0237	1.3933	2.01243
						2014	1	22	22	9.6	0.1	4.85	85	18.8993	14.3635	9.32026	1.23812	1.24624
						2014	1	23	23	11.5	6.5	9	77	20.6792	8.2717	7.39843	1.1629	1.20455
						2014	1	24	24	7.9	1.8	4.85	87	24.6979	12.0526	9.7599	1.29653	1.0712
						2014	1	25	25	7.6	-1.5	3.05	86.5	20.2211	14.721	9.7599	1.19349	0.880596
						2014	1	26	26	9.8	5.7	7.75	80.5	26.4034	8.66031	8.55404	1.28183	1.13528
						2014	1	27	27	11.6	7.1	9.35	73.5	29.9766	10.7916	10.1744	1.62012	1.53336
						2014	1	28	28	12.4	7.4	9.9	81.5	13.6223	5.44893	4.87367	0.791779	0.929195
						2014	1	29	29	13.7	6.8	10.25	75.5	2.85419	1.57551	1.19958	0.197346	0.461274
						2014	1	30	30	13.5	7.3	10.4	64	26.1269	12.959	10.4089	1.72156	1.91015
						2014	1	31	31	12.8	-1.8	5.5	64	17.649	20.6141	10.7899	1.47449	1.88831
						2014	2	1	32	11.7	-4.1	3.8	60	17.8544	22.5679	11.3551	1.43852	1.54505
						2014	2	2	33	8.3	-0.3	4	37.5	23.732	16.3276	11.1353	1.42373	1.41663
						2014	2	3	34	7	-5.4	0.8	39	21.2539	21.0838	11.9748	1.30632	0.420901
						2014	2	4	35	6.4	-9.5	-1.55	51.5	19.383	24.6552	12.3663	1.17859	-0.95547
						2014	2	5	36	10.3	-9.6	0.35	46.5	17.4109	27.7181	12.427	1.32285	0.22123
						2014	2	6	37	11.1	-8.6	1.25	45	18.1476	28.6006	12.8876	1.43991	0.784127
						2014	2	7	38	11.6	-7.6	2	50.5	17.379	26.6942	12.1842	1.41491	1.04978
						2014	2	8	39	11.7	-7.7	2	53.5	12.5926	19.5437	8.87435	1.03055	0.788995
						2014	2	9	40	13.7	-7.5	3.1	48	12.2422	20.7628	9.0188	1.10551	1.24801
						2014	2	10	41	14	-5.1	4.45	44.5	15.215	23.2485	10.6392	1.38837	1.93835
						2014	2	11	42	15	-2.6	6.2	51.5	9.54997	13.4464	6.4103	0.902313	1.40853
						2014	2	12	43	17.8	-4.7	6.55	52	11.5357	20.7643	8.75502	1.25033	2.1534
						2014	2	13	44	17.9	-5	6.45	48	10.8932	19.9563	8.3405	1.18624	2.1138
						2014	2	14	45	18.8	-4.8	7	47	7.98317	15.0722	6.20513	0.902549	1.76537
						2014	2	15	46	12.9	1	6.95	62	24.6695	23.4853	13.6161	1.9765	2.51035
						2014	2	16	47	10.2	4.6	7.4	80	9.48803	4.25064	3.59245	0.530956	0.649349
						2014	2	17	48	16.3	0.6	8.45	64.5	4.51741	5.67386	2.86391	0.440917	0.867268
						2014	2	18	49	16.6	-1.6	7.5	60	7.63689	11.1193	5.21281	0.773501	1.36496
						2014	2	19	50	18.6	-0.7	8.95	62.5	17.5126	27.0395	12.3098	1.93127	3.37452
						2014	2	20	51	19.3	-1.2	9.05	57	20.1481	33.0428	14.5959	2.29849	4.09834
						2014	2	21	52	20.4	-0.1	10.15	58	18.0327	29.5736	13.0634	2.14145	3.96141
						2014	2	22	53	19.4	2.3	10.85	58	20.4087	27.9191	13.5031	2.26895	3.90466
						2014	2	23	54	21.3	4	12.65	50	21.9891	30.4329	14.6336	2.6134	4.6126
						2014	2	24	55	21.5	1.6	11.55	48	8.32413	13.252	5.94135	1.02273	2.12812
						2014	2	25	56	21.2	6.2	13.7	37	13.3851	16.0621	8.29445	1.53238	3.18499
						2014	2	26	57	18.8	8.2	13.5	59	17.5663	14.8962	9.15069	1.67983	2.4943
						2014	2	27	58	11.7	3.5	7.6	85	32.4418	21.2818	14.8638	2.21428	2.43646
						2014	2	28	59	14.7	6.6	10.65	69.5	27.6578	17.9223	12.5945	2.10151	2.57585
						2014	3	1	60	13	2.9	7.95	69.5	25.2296	20.3855	12.829	1.93748	2.41355
						2014	3	2	61	15.6	4.5	10.05	65	24.0349	21.343	12.8122	2.09275	2.91439
						2014	3	3	62	20.5	5	12.75	73.5	21.6754	26.8775	13.6538	2.44643	4.12592
						2014	3	4	63	15.9	8.8	12.35	70.5	31.4074	17.8394	13.39	2.36775	2.78975
						2014	3	5	64	18.7	6.2	12.45	75.5	27.4675	27.4675	15.538	2.75669	4.15581
						2014	3	6	65	20.5	8.7	14.6	69	26.0079	24.5515	14.2944	2.71631	4.07362
						2014	3	7	66	22.8	10.1	16.45	56	25.8184	26.2315	14.7215	2.9572	4.59223
						2014	3	8	67	22.9	6.8	14.85	58	22.5688	29.0686	14.4891	2.77455	4.80532
						2014	3	9	68	23.6	9	16.3	59.5	23.4841	27.4294	14.3572	2.87139	4.76555
						2014	3	10	69	18.7	12.2	15.45	67.5	18.6604	9.70339	7.61197	1.48442	1.85499
						2014	3	11	70	18.3	4.7	11.5	63	11.3252	12.3218	6.68245	1.14834	1.9388
						2014	3	12	71	14.6	6.9	10.75	70.5	34.9685	21.5406	15.5254	2.59966	3.05821
						2014	3	13	72	11.6	5.3	8.45	72.5	34.5305	17.4034	13.8673	2.13496	2.17752
						2014	3	14	73	13.3	5.6	9.45	75	23.0577	14.2036	10.2372	1.63612	1.95223
						2014	3	15	74	18.2	0.7	9.45	65.5	7.20637	10.0889	4.82342	0.770886	1.45923
						2014	3	16	75	17.5	0.6	9.05	60	26.621	35.9915	17.51	2.7574	4.44232
						2014	3	17	76	13.8	9	11.4	73	47.5863	18.2731	16.681	2.85676	2.72588
						2014	3	18	77	10.4	6.5	8.45	86.5	46.6305	14.5487	14.7341	2.2684	1.85864
						2014	3	19	78	17.2	3	10.1	68.5	23.3334	26.5067	14.0683	2.30205	3.56719
						2014	3	20	79	20.6	0.3	10.45	57.5	21.7804	35.3714	15.7012	2.60148	4.76842
						2014	3	21	80	20.7	5.2	12.95	61.5	23.5698	29.2265	14.8471	2.67766	4.49804
						2014	3	22	81	22.9	0.5	11.7	51.5	14.5721	26.1132	11.0348	1.90922	3.8312
						2014	3	23	82	23	0.8	11.9	55.5	15.529	27.5795	11.7069	2.03922	4.0688
						2014	3	24	83	24.1	2.4	13.25	52.5	18.4286	31.9921	13.7355	2.50134	4.95548
						2014	3	25	84	23.4	2.3	12.85	52	22.5257	38.0234	16.5554	2.97604	5.73758
						2014	3	26	85	23.1	6	14.55	52.5	24.4524	33.4509	16.1786	3.0696	5.42495
						2014	3	27	86	22.9	6.6	14.75	54	28.6815	37.4007	18.5275	3.537	6.06963
						2014	3	28	87	23.1	3.8	13.45	54	23.1596	35.7584	16.2791	2.98365	5.54688
						2014	3	29	88	22.7	9.9	16.3	50	23.7096	24.2786	13.5722	2.71438	4.25689
						2014	3	30	89	11.5	1	6.25	71	21.4172	17.9904	11.1039	1.56624	1.83086
						2014	3	31	90	11.2	-4.3	3.45	47.5	12.9215	16.0227	8.13953	1.01444	1.08744
						2014	4	1	91	15.7	-4.6	5.55	50.5	14.4796	23.5149	10.4382	1.42949	2.14371
						2014	4	2	92	19.9	-1.1	9.4	53	21.6884	36.4366	15.9022	2.53685	4.60108
						2014	4	3	93	20.9	0.7	10.8	52	21.7644	35.1713	15.651	2.62528	4.8353
						2014	4	4	94	21	1.9	11.45	47	26.2265	40.0741	18.3391	3.14609	5.90078
						2014	4	5	95	23.1	0.7	11.9	47.5	21.4808	38.4936	16.2665	2.83347	5.7643
						2014	4	6	96	26.2	7.3	16.75	43	20.496	30.99	14.2567	2.88892	5.95101
						2014	4	7	97	25.9	12.5	19.2	34	14.5191	15.5645	8.5038	1.84537	3.77479
						2014	4	8	98	26.2	16.6	21.4	27	30.6334	23.5264	15.1862	3.49144	6.20266
						2014	4	9	99	21.9	4.4	13.15	59.5	24.359	34.1026	16.3042	2.95956	5.24118
						2014	4	10	100	17.5	9	13.25	69.5	36.2982	24.6828	16.9322	3.0835	3.89271
						2014	4	11	101	21.9	3.5	12.7	57	18.6496	27.4522	12.7997	2.28964	4.19883
						2014	4	12	102	23.4	4.9	14.15	56.5	26.1191	38.6562	17.9748	3.36824	6.13151
						2014	4	13	103	16	9.3	12.65	70	39.1555	20.9874	16.2163	2.89605	3.27298
						2014	4	14	104	22.4	5.3	13.85	61.5	27.547	37.6842	18.226	3.38324	5.91926
						2014	4	15	105	22.2	7	14.6	62.5	25.9559	31.5623	16.1911	3.07674	5.14562
						2014	4	16	106	21.4	11.4	16.4	66	34.8555	27.8844	17.6356	3.53741	4.85318
						2014	4	17	107	22.9	7.7	15.3	69	24.6269	29.9463	15.3621	2.98227	5.01478
						2014	4	18	108	28.1	13.2	20.65	61.5	32.9478	39.2737	20.3488	4.58885	7.42749
						2014	4	19	109	28	10.5	19.25	59	25.5226	35.7316	17.083	3.7121	6.58979
						2014	4	20	110	20.9	12.7	16.8	70.5	43.8923	28.7934	20.1102	4.08093	5.05788
						2014	4	21	111	22.2	7	14.6	72.5	31.292	38.0511	19.5198	3.70927	6.13779
						2014	4	22	112	23.8	8.3	16.05	62.5	28.8541	35.779	18.1758	3.60844	6.06819
						2014	4	23	113	25.5	5.9	15.7	56	24.1875	37.926	17.1332	3.36629	6.3439
						2014	4	24	114	25.5	7.2	16.35	56	23.8206	34.8734	16.3042	3.26556	5.97605
						2014	4	25	115	27.4	9.3	18.35	57.5	24.6715	35.7244	16.7941	3.56067	6.44999
						2014	4	26	116	32.3	15.6	23.95	45	22.0924	29.5155	14.4451	3.53709	6.45484
						2014	4	27	117	30.9	8.1	19.5	50	22.2287	40.5451	16.9825	3.71516	7.47041
						2014	4	28	118	26.4	9.6	18	58	29.6114	39.7977	19.4193	4.07741	7.08284
						2014	4	29	119	27.2	9	18.1	57	28.6797	41.7577	19.5763	4.12186	7.43292
						2014	4	30	120	26.5	6.4	16.45	54	27.2468	43.8129	19.5449	3.92611	7.44298
						2014	5	1	121	28.7	7.6	18.15	51.5	22.8163	38.5138	16.7689	3.53568	6.89163
						2014	5	2	122	27.3	6.5	16.9	49.5	25.9582	43.1944	18.942	3.85499	7.49027
						2014	5	3	123	26.7	4.7	15.7	49.5	26.2445	46.1904	19.6956	3.86975	7.70877
						2014	5	4	124	28.3	6	17.15	51	28.6692	51.1458	21.6614	4.4402	8.80336
						2014	5	5	125	31.3	9.7	20.5	48	25.9459	44.8345	19.2937	4.33393	8.64015
						2014	5	6	126	33	11.2	22.1	45.5	28.685	50.0267	21.4291	5.01469	10.2427
						2014	5	7	127	30.2	11.4	20.8	49.5	28.5081	42.8762	19.7773	4.47736	8.15678
						2014	5	8	128	32.8	16.1	24.45	44.5	24.9613	33.3482	16.3209	4.04426	7.3437
						2014	5	9	129	28.3	16.6	22.45	55.5	22.6302	21.1819	12.3851	2.92371	4.32471
						2014	5	10	130	27.8	9.6	18.7	62	22.7819	33.1704	15.5505	3.32894	6.06541
						2014	5	11	131	27.9	9.2	18.55	50.5	27.9216	41.7707	19.3188	4.11863	7.51776
						2014	5	12	132	24.1	7.6	15.85	55	24.5516	32.4081	15.9567	3.14916	5.49454
						2014	5	13	133	23.1	7.3	15.2	61.5	31.2451	39.4938	19.8715	3.84603	6.48818
						2014	5	14	134	24.9	10.1	17.5	60.5	29.9979	35.5175	18.4647	3.82282	6.27756
						2014	5	15	135	29	7.9	18.45	58	26.2173	44.2548	19.2686	4.09662	7.92434
						2014	5	16	136	32	9.8	20.9	51	17.1619	30.4795	12.9378	2.93657	5.87793
						2014	5	17	137	34.4	11.4	22.9	47	25.7331	47.349	19.7459	4.71345	9.65722
						2014	5	18	138	33.3	8.8	21.05	42.5	28.0734	55.0238	22.233	5.0659	11.446
						2014	5	19	139	28.2	7.4	17.8	48.5	21.1039	35.1169	15.3998	3.21538	6.39351
						2014	5	20	140	25.7	5.9	15.8	56.5	30.7076	48.6408	21.8624	4.3083	8.06752
						2014	5	21	141	28.1	6.7	17.4	53.5	23.3176	39.9198	17.2588	3.56305	6.99385
						2014	5	22	142	26.9	10.4	18.65	52	32.321	42.6638	21.0062	4.49069	7.68927
						2014	5	23	143	29.3	13.1	21.2	53.5	29.7257	38.5245	19.143	4.37867	7.37343
						2014	5	24	144	26.2	14.8	20.5	59	37.9233	34.586	20.487	4.60198	6.56552
						2014	5	25	145	30.5	10.2	20.35	54	28.5759	46.4073	20.6	4.60925	8.65474
						2014	5	26	146	31.6	10.2	20.9	51	29.3591	50.2629	21.7305	4.9323	9.44831
						2014	5	27	147	32	11.1	21.55	50	26.3425	44.0446	19.2686	4.44695	8.43235
						2014	5	28	148	31.1	10.5	20.8	51	30.016	49.4664	21.7975	4.93472	9.28592
						2014	5	29	149	33.6	11.7	22.65	47.5	29.626	51.9047	22.1827	5.26261	10.4293
						2014	5	30	150	35.4	13.6	24.5	38	29.0381	50.6425	21.6928	5.38177	11.8775
						2014	5	31	151	37.8	12.9	25.35	37	26.5254	52.8386	21.1778	5.35958	12.6845
						2014	6	1	152	35.8	19.4	27.6	29.5	33.2659	43.6449	21.5547	5.73939	11.8757
						2014	6	2	153	32.4	12.8	22.6	36.5	30.6777	48.1026	21.7305	5.14896	11.156
						2014	6	3	154	28.8	9.8	19.3	51.5	30.5279	46.4024	21.2909	4.63272	8.45861
						2014	6	4	155	30.3	8.5	19.4	53.5	24.8177	43.2821	18.54	4.04503	7.93221
						2014	6	5	156	27.8	11.4	19.6	57.5	33.6536	44.1536	21.8059	4.78315	8.12069
						2014	6	6	157	36.1	14.4	25.25	54.5	27.6387	47.9808	20.6	5.20127	9.73738
						2014	6	7	158	31.9	12	21.95	52	29.6008	47.1245	21.1276	4.92556	9.06306
						2014	6	8	159	32.7	11.9	22.3	46.5	29.5386	49.1522	21.5547	5.06937	9.97183
						2014	6	9	160	34.3	11.6	22.95	39	28.7532	52.2159	21.9189	5.2386	11.7806
						2014	6	10	161	36.5	12.9	24.7	34.5	26.8664	50.7238	20.8827	5.20526	12.4418
						2014	6	11	162	36.7	14.3	25.5	35	26.9215	48.2433	20.3865	5.17724	11.9295
						2014	6	12	163	34.1	15.1	24.6	34.5	26.8718	40.8451	18.741	4.66044	10.0991
						2014	6	13	164	31.2	13.9	22.55	39	32.8421	45.4534	21.8561	5.17232	10.2418
						2014	6	14	165	34.3	11.1	22.7	34	27.806	51.608	21.4291	5.0901	12.3142
						2014	6	15	166	35.9	12.8	24.35	28.5	23.848	44.071	18.3391	4.53359	11.5748
						2014	6	16	167	36.1	15.3	25.7	27	29.7107	49.4387	21.6803	5.53124	13.4009
						2014	6	17	168	36.1	15.9	26	25.5	30.7077	49.6237	22.0822	5.67264	13.7243
						2014	6	18	169	37.5	17.6	27.55	27.5	29.0729	46.284	20.7508	5.51924	12.8304
						2014	6	19	170	37.3	16.5	26.9	27	31.2341	51.9736	22.7919	5.97526	14.2952
						2014	6	20	171	36.8	18.7	27.75	23.5	30.7795	44.5687	20.9517	5.59728	12.9435
						2014	6	21	172	37.4	16.2	26.8	22	30.4521	51.6468	22.4339	5.86825	14.9527
						2014	6	22	173	35.9	14.9	25.4	26	28.1641	47.3157	20.6503	5.23212	12.9307
						2014	6	23	174	36.5	14.7	25.6	25	29.1222	50.7891	21.7557	5.53771	14.0277
						2014	6	24	175	36.1	15.4	25.75	22.5	29.955	49.6054	21.8059	5.56968	14.1049
						2014	6	25	176	37.1	17.1	27.1	22	29.5618	47.2989	21.1527	5.57033	13.7977
						2014	6	26	177	36.5	21.5	29	22.5	33.5675	40.281	20.801	5.7095	12.0582
						2014	6	27	178	36.8	17	26.9	19.5	28.7228	45.4968	20.4493	5.3611	13.5974
						2014	6	28	179	36.5	18.8	27.65	23	29.0727	41.1669	19.57	5.21667	12.0467
						2014	6	29	180	36.1	18.1	27.1	21.5	27.5711	39.7024	18.7159	4.92861	11.735
						2014	6	30	181	36.4	17.2	26.8	17.5	29.2756	44.9673	20.5247	5.36882	13.6953
						2014	7	1	182	37.9	18.4	28.15	15	30.294	47.2586	21.4039	5.76829	14.9701
						2014	7	2	183	37.9	17.4	27.65	18	27.7426	45.4979	20.0976	5.3573	13.9359
						2014	7	3	184	38.2	27.7	32.95	18	40.8961	34.3527	21.203	6.31104	11.3121
						2014	7	4	185	37.9	21.5	29.7	22.5	31.7926	41.7119	20.6	5.73891	12.5664
						2014	7	5	186	38.6	28.7	33.65	28.5	42.5164	33.673	21.4039	6.45873	10.0235
						2014	7	6	187	37.9	18.1	28	33.5	29.0403	45.9999	20.6754	5.55377	11.9956
						2014	7	7	188	37.9	16.2	27.05	26	25.5153	44.2945	19.0174	5.00242	12.4213
						2014	7	8	189	37.9	19.9	28.9	22	30.3097	43.646	20.5749	5.63538	13.0672
						2014	7	9	190	37.9	19.2	28.55	21	30.4269	45.5186	21.0522	5.7229	13.6837
						2014	7	10	191	37.9	16.3	27.1	18.5	28.733	49.6507	21.3663	5.62656	14.9709
						2014	7	11	192	37.9	17.7	27.8	18	28.4282	45.94	20.443	5.46737	14.0922
						2014	7	12	193	37.9	18.4	28.15	17	28.6051	44.6239	20.2106	5.4467	13.901
						2014	7	13	194	37.9	20.4	29.15	16	31.0587	43.4822	20.7885	5.72435	13.8581
						2014	7	14	195	37.9	18.6	28.25	22	27.8058	42.9321	19.5449	5.27875	12.7629
						2014	7	15	196	37.9	18.9	28.4	15.5	27.3941	41.639	19.1053	5.17682	13.2427
						2014	7	16	197	37.9	20.4	29.15	19.5	29.2759	40.9862	19.5952	5.39576	12.6583
						2014	7	17	198	37.9	20.6	29.25	19.5	28.7274	39.7587	19.1178	5.27554	12.3119
						2014	7	18	199	37.9	18.6	28.25	19.5	27.8415	42.9873	19.57	5.28554	13.1045
						2014	7	19	200	37.9	18.9	28.4	17.5	28.5017	43.3226	19.8778	5.38614	13.4894
						2014	7	20	201	37.9	20.3	29.1	26	26.3357	37.0807	17.6775	4.86253	10.7599
						2014	7	21	202	36.8	21.9	29.35	49	31.6529	37.7303	19.5491	5.40601	8.28592
						2014	7	22	203	37.9	17.1	27.5	50	27.2664	45.3713	19.8966	5.28622	9.52018
						2014	7	23	204	37.9	20.2	29.05	35.5	27.6358	39.1323	18.6028	5.1116	10.1731
						2014	7	24	205	38.7	20.5	29.6	25.5	28.7074	41.7979	19.5952	5.44747	12.1898
						2014	7	25	206	37.9	21.5	29.7	19.5	28.7297	37.6933	18.6154	5.18602	11.7647
						2014	7	26	207	37.9	21.6	29.75	20.5	29.1191	37.9712	18.8101	5.24577	11.7356
						2014	7	27	208	37.9	23.6	30.75	25.5	32.0956	36.7174	19.4193	5.52956	10.916
						2014	7	28	209	37.9	17.9	27.9	23.5	26.5951	42.5522	19.0299	5.1006	12.4075
						2014	7	29	210	37.9	19.8	28.85	20.5	28.4175	41.1485	19.3439	5.29255	12.5353
						2014	7	30	211	37.9	19.4	28.65	18.5	26.0826	38.6022	17.9497	4.89001	12.0055
						2014	7	31	212	37.9	19.1	28.5	15	26.7971	40.3028	18.5903	5.04818	12.9152
						2014	8	1	213	37.8	18.1	27.95	17	25.5056	40.1969	18.113	4.86014	12.5524
						2014	8	2	214	38.2	18.5	28.35	17	27.6812	43.6256	19.658	5.32082	13.6373
						2014	8	3	215	37.8	21.7	29.75	19	28.233	36.3642	18.1255	5.05486	11.4346
						2014	8	4	216	37.8	19.8	28.8	23.5	28.1817	40.5817	19.1304	5.22851	11.9908
						2014	8	5	217	37.8	24.6	31.2	28.5	30.4567	32.1622	17.7047	5.08807	9.37317
						2014	8	6	218	35.7	17.8	26.75	43	26.4512	37.8781	17.9057	4.67851	8.73243
						2014	8	7	219	37.8	18.4	28.1	28	25.9516	40.2769	18.2888	4.92341	11.254
						2014	8	8	220	37.8	18	27.9	21	24.1444	38.2447	17.1897	4.60737	11.5007
						2014	8	9	221	37.8	17.8	27.8	26.5	23.6167	37.7867	16.8987	4.51946	10.725
						2014	8	10	222	37.8	19.8	28.8	18.5	25.7639	37.1	17.4891	4.77993	11.5831
						2014	8	11	223	37.8	20.8	29.3	23	26.9519	36.6546	17.7801	4.9116	11.0081
						2014	8	12	224	37.8	20	28.9	19	25.6601	36.54	17.3216	4.74431	11.3748
						2014	8	13	225	37.8	19.6	28.7	19	26.1126	38.02	17.8241	4.86102	11.7825
						2014	8	14	226	37.8	20.4	29.1	17.5	26.4929	36.8781	17.6817	4.86368	11.6722
						2014	8	15	227	37.8	21.8	29.8	17	27.7323	35.4974	17.7487	4.95497	11.4046
						2014	8	16	228	37.8	20.8	29.3	17	26.1903	35.6188	17.2777	4.77281	11.3765
						2014	8	17	229	37.8	21.3	29.55	15.5	27.6761	36.5325	17.9874	4.99523	11.8558
						2014	8	18	230	38.2	22.4	30.3	18.5	25.1719	31.8172	16.009	4.51624	10.1945
						2014	8	19	231	37.8	28.2	33	15.5	32.1156	24.6648	15.9211	4.74355	8.51245
						2014	8	20	232	37.8	24.1	30.95	36.5	25.841	28.3218	15.3035	4.37555	7.57473
						2014	8	21	233	37.8	15.2	26.5	18	21.4296	38.7446	16.3	4.23506	11.7785
						2014	8	22	234	38	14.4	26.2	16	23.7556	44.8505	18.4647	4.76499	13.7483
						2014	8	23	235	37.8	17.7	27.75	15	19.1043	30.7197	13.7041	3.66105	9.90335
						2014	8	24	236	37.9	20.5	29.2	17.5	14.3882	20.0284	9.60288	2.64708	6.63288
						2014	8	25	237	37.8	20.2	29	14.5	11.2965	15.9055	7.58266	2.0813	5.54148
						2014	8	26	238	37.8	19.5	28.65	14.5	19.6823	28.8149	13.4717	3.67008	9.47728
						2014	8	27	239	37.8	20.9	29.35	15	17.9956	24.33	11.8366	3.27324	8.13018
						2014	8	28	240	37.8	20.5	29.15	14	19.0635	26.3839	12.6866	3.49341	8.82519
						2014	8	29	241	37.8	19	28.4	18.5	16.7663	25.2165	11.6315	3.1517	8.032
						2014	8	30	242	37.8	18.7	28.25	19	19.0172	29.0583	13.2979	3.59154	9.10022
						2014	8	31	243	37.8	18.5	28.15	17	19.1924	29.6331	13.4905	3.63565	9.44005
						2014	9	1	244	37.6	16.4	27	17	19.0283	32.272	14.0181	3.68328	10.0761
						2014	9	2	245	38.7	16.7	27.7	14	19.4937	34.3089	14.6294	3.90396	11.0843
						2014	9	3	246	37	22	29.5	20	22.9675	27.561	14.2325	3.94829	8.70493
						2014	9	4	247	36.8	16.9	26.85	23.5	20.8015	33.116	14.8471	3.88804	9.65288
						2014	9	5	248	36.8	17.7	27.25	19	21.1519	32.32	14.7906	3.90794	9.92682
						2014	9	6	249	36.8	19.9	28.35	25	20.7582	28.0651	13.6538	3.69567	8.29684
						2014	9	7	250	36.6	17	26.8	27	19.5681	30.6828	13.8611	3.62576	8.65403
						2014	9	8	251	35.7	16.9	26.3	31.5	20.478	30.7989	14.2065	3.67446	8.20847
						2014	9	9	252	35.3	18.5	26.9	31	19.8048	26.6176	12.9881	3.40502	7.26422
						2014	9	10	253	36.3	18.5	27.4	31.5	21.5106	30.6311	14.5205	3.84936	8.28741
						2014	9	11	254	34.3	15.9	25.1	32.5	19.0339	28.018	13.0634	3.28687	7.30268
						2014	9	12	255	35.3	15.7	25.5	30.5	16.917	26.5259	11.9832	3.04319	7.14134
						2014	9	13	256	36.7	16.1	26.4	27	18.6116	30.6719	13.5156	3.5037	8.60436
						2014	9	14	257	37.3	18.1	27.7	23	19.8515	30.4919	13.9176	3.71401	9.07954
						2014	9	15	258	35.6	16.4	26	24	17.5761	26.9969	12.3223	3.16545	7.84191
						2014	9	16	259	34.2	17.2	25.7	27.5	19.6816	26.767	12.9839	3.31255	7.4644
						2014	9	17	260	35	17	26	26.5	18.208	26.2196	12.36	3.17513	7.43358
						2014	9	18	261	33.8	19	26.4	30	21.5495	25.5146	13.2644	3.43857	7.01603
						2014	9	19	262	35.1	15.7	25.4	29.5	17.2001	26.6945	12.1214	3.07117	7.2531
						2014	9	20	263	31.8	15.2	23.5	32.5	19.3457	25.6911	12.6112	3.05475	6.57094
						2014	9	21	264	31.4	12.1	21.75	35	16.9051	26.1014	11.8827	2.75632	6.2806
						2014	9	22	265	32.3	13.3	22.8	29	16.8489	25.6103	11.7508	2.79809	6.73337
						2014	9	23	266	32	14.1	23.05	32	14.2446	20.3983	9.64266	2.31024	5.30907
						2014	9	24	267	31.1	17.5	24.3	53	21.107	22.9645	12.4542	3.07516	4.80243
						2014	9	25	268	29.6	11.4	20.5	50	9.34829	13.6111	6.38099	1.43336	2.81072
						2014	9	26	269	29.8	7.9	18.85	23.5	16.0013	28.0342	11.9811	2.57536	7.16902
						2014	9	27	270	32.5	9	20.75	24.5	10.7046	20.1247	8.30282	1.87723	5.45318
						2014	9	28	271	25.3	14.6	19.95	63.5	4.17601	3.57467	2.18561	0.483903	1.00238
						2014	9	29	272	23.3	11.6	17.45	72.5	19.0727	17.8521	10.4382	2.158	3.32439
						2014	9	30	273	25.8	11.7	18.75	61.5	11.2899	12.735	6.78294	1.45403	2.55319
						2014	10	1	274	27.3	10.2	18.75	57.5	15.8903	21.7379	10.5136	2.25375	4.1037
						2014	10	2	275	30.4	11.4	20.9	52.5	19.8296	30.141	13.8297	3.13899	5.81685
						2014	10	3	276	31.2	18.5	24.85	33.5	22.1762	22.5311	12.6447	3.16298	5.88145
						2014	10	4	277	30.9	17.2	24.05	40.5	22.0904	24.2111	13.0823	3.21105	5.70293
						2014	10	5	278	30	12.3	21.15	46.5	16.0105	22.6709	10.7773	2.46199	4.7154
						2014	10	6	279	30	11.5	20.75	45.5	15.3441	22.7093	10.5596	2.38748	4.74899
						2014	10	7	280	30.7	11.7	21.2	40.5	15.5251	23.5982	10.8276	2.47665	5.29653
						2014	10	8	281	30.6	11.2	20.9	40	14.2948	22.1855	10.0739	2.28653	5.00696
						2014	10	9	282	30.8	11.5	21.15	38.5	19.1924	29.6331	13.4905	3.0818	6.69883
						2014	10	10	283	31.7	12.7	22.2	35.5	14.7026	22.348	10.254	2.40558	5.45753
						2014	10	11	284	29.8	15.9	22.85	37.5	16.2771	18.1001	9.70965	2.3149	4.45324
						2014	10	12	285	27.8	15.9	21.85	44	13.8368	13.1726	7.63709	1.77598	3.04593
						2014	10	13	286	28.1	14.9	21.5	57	20.1604	21.2894	11.7194	2.70126	4.26914
						2014	10	14	287	26.2	13.3	19.75	55.5	18.7833	19.3843	10.7941	2.37719	3.7835
						2014	10	15	288	26.2	13.3	19.75	60.5	12.1749	12.5645	6.99648	1.54084	2.58193
						2014	10	16	289	22.4	11	16.7	67	7.73501	7.05433	4.17863	0.845514	1.49338
						2014	10	17	290	22.8	12	17.4	65.5	10.1049	8.73065	5.3133	1.09692	1.80144
						2014	10	18	291	19.8	12.9	16.35	76	26.4498	14.6003	11.1165	2.22652	2.6984
						2014	10	19	292	17.6	12.8	15.2	81	34.8237	13.3723	12.2072	2.36264	2.41253
						2014	10	20	293	17.3	7.2	12.25	68	19.3998	15.6751	9.86457	1.73856	2.4757
						2014	10	21	294	22.2	12.3	17.25	64.5	18.289	14.4849	9.20721	1.89271	2.74835
						2014	10	22	295	21.6	11.1	16.35	66	16.5474	13.8998	8.57916	1.71832	2.58515
						2014	10	23	296	20.9	8.9	14.9	65.5	15.7242	15.0952	8.71524	1.67146	2.6548
						2014	10	24	297	23.4	7.1	15.25	60.5	11.1615	14.5546	7.21001	1.39758	2.60123
						2014	10	25	298	24.7	7.2	15.95	58.5	12.9677	18.1548	8.67965	1.71808	3.23426
						2014	10	26	299	25.1	8.3	16.7	57	13.1585	17.685	8.62941	1.7461	3.2295
						2014	10	27	300	24.9	8	16.45	57	6.89395	9.32062	4.53452	0.910878	1.85019
						2014	10	28	301	23.8	9.1	16.45	56.5	11.0161	12.9549	6.75782	1.35749	2.43948
						2014	10	29	302	24.6	7.5	16.05	56.5	8.27738	11.3234	5.4766	1.08727	2.14939
						2014	10	30	303	21.9	7	14.45	54	9.18606	10.9498	5.67338	1.0731	1.98342
						2014	10	31	304	15.8	11.9	13.85	78.5	28.3838	8.85574	8.96855	1.66481	1.62896
						2014	11	1	305	17.9	11.1	14.5	76	18.7559	10.2032	7.8255	1.48246	1.87315
						2014	11	2	306	17.7	7.2	12.45	68.5	16.4263	13.7981	8.51636	1.51094	2.23388
						2014	11	3	307	14.3	4.9	9.6	49.5	18.0436	13.5688	8.85132	1.42242	1.90787
						2014	11	4	308	15.1	-2.6	6.25	53	14.1818	20.0814	9.54636	1.34655	2.02151
						2014	11	5	309	16.1	-1.8	7.15	46.5	11.319	16.2088	7.66221	1.12122	1.92267
						2014	11	6	310	17.6	-2.3	7.65	51	11.7265	18.6686	8.36981	1.24931	2.17347
						2014	11	7	311	19.7	-1.9	8.9	51.5	11.447	19.7805	8.51217	1.33297	2.52472
						2014	11	8	312	20.2	-1.1	9.55	53.5	10.8356	18.4639	8.00136	1.28348	2.47861
						2014	11	9	313	19.7	-1.4	9.15	55.5	10.0665	16.9922	7.39843	1.16941	2.24127
						2014	11	10	314	19.6	0	9.8	49	8.40533	13.1796	5.95391	0.963784	1.89724
						2014	11	11	315	19.3	1.2	10.25	50.5	10.5366	15.257	7.17233	1.17994	2.18298
						2014	11	12	316	19.9	0.7	10.3	56	9.99145	15.3469	7.00485	1.15444	2.20063
						2014	11	13	317	20.3	-0.3	10	49	8.71192	14.3572	6.32656	1.03153	2.06859
						2014	11	14	318	21.2	4.3	12.75	40.5	5.6081	7.58215	3.68875	0.660934	1.56459
						2014	11	15	319	20.3	11.2	15.75	36	10.6093	7.72361	5.1207	1.0076	1.86985
						2014	11	16	320	20	14	17	44	19.3796	9.3022	7.59522	1.5502	2.03697
						2014	11	17	321	15	10.6	12.8	73.5	23.404	8.2382	7.85481	1.4097	1.47418
						2014	11	18	322	15.1	7.7	11.4	83.5	15.7188	9.30552	6.84156	1.17167	1.52545
						2014	11	19	323	14	4.8	9.4	85.5	13.252	9.75345	6.43123	1.02596	1.41442
						2014	11	20	324	9.4	4.8	7.1	82	8.28464	3.04875	2.84297	0.415184	0.511782
						2014	11	21	325	13.5	5.7	9.6	83.5	8.68123	5.41709	3.87926	0.6234	0.908174
						2014	11	22	326	15.3	7.3	11.3	83.5	6.86965	4.39657	3.10885	0.530592	0.863972
						2014	11	23	327	11.9	3.9	7.9	80	12.8974	8.25431	5.83668	0.879765	1.10625
						2014	11	24	328	10.6	3.9	7.25	82.5	14.4369	7.73818	5.97904	0.87843	0.992756
						2014	11	25	329	12.2	5.4	8.8	84.5	10.1958	5.54653	4.25399	0.663661	0.875313
						2014	11	26	330	10.8	2.8	6.8	86	9.09939	5.82361	4.11791	0.594129	0.765224
						2014	11	27	331	9.6	5.9	7.75	80.5	19.6993	5.83099	6.06278	0.908512	0.836491
						2014	11	28	332	12.2	5.6	8.9	87.5	13.8838	7.33062	5.70688	0.893672	1.08751
						2014	11	29	333	10.4	0.5	5.45	82.5	6.38744	5.05885	3.21562	0.438485	0.59061
						2014	11	30	334	8.8	-0.5	4.15	84.5	10.1943	7.58457	4.97416	0.640357	0.649939
						2014	12	1	335	8.6	3.9	6.25	94	14.5875	5.4849	5.05999	0.713728	0.690652
						2014	12	2	336	10.1	6.1	8.1	85.5	17.9256	5.73619	5.73619	0.871347	0.850717
						2014	12	3	337	10.1	8	9.05	81	23.5298	3.953	5.45566	0.859132	0.704933
						2014	12	4	338	10.6	8.2	9.4	65.5	24.1891	4.64431	5.99578	0.956495	0.804254
						2014	12	5	339	10.9	5.8	8.35	66.5	16.1069	6.57163	5.81993	0.892601	0.960198
						2014	12	6	340	8.8	4.5	6.65	85	16.3046	5.6088	5.4096	0.775733	0.733075
						2014	12	7	341	14.4	8.1	11.25	86.5	11.505	5.7985	4.62035	0.787208	1.04804
						2014	12	8	342	15.6	10.3	12.95	86	12.2593	5.19794	4.51568	0.814397	1.04678
						2014	12	9	343	18.4	7.6	13	85	5.24357	4.53044	2.75714	0.498055	0.952871
						2014	12	10	344	15.7	8.1	11.9	74.5	7.7458	4.70945	3.41659	0.595138	0.932459
						2014	12	11	345	12.8	3	7.9	79	12.2129	9.57494	6.11721	0.92205	1.24749
						2014	12	12	346	10	6.1	8.05	83.5	18.7436	5.84801	5.92251	0.897913	0.859406
						2014	12	13	347	10.6	6.9	8.75	92	20.5292	6.07663	6.31818	0.983841	0.932716
						2014	12	14	348	12.3	8.5	10.4	87	16.1628	4.9135	5.04115	0.833771	0.888949
						2014	12	15	349	14.5	6.5	10.5	81	12.9899	8.31352	5.87855	0.975718	1.32798
						2014	12	16	350	11.9	1.4	6.65	86.5	11.2981	9.49042	5.85761	0.839977	1.10268
						2014	12	17	351	10.5	0.2	5.35	95	10.9588	9.03006	5.62733	0.764049	0.906272
						2014	12	18	352	8.1	2.8	5.45	88	16.7208	7.08963	6.15908	0.839859	0.758386
						2014	12	19	353	9.3	0.5	4.9	74.5	11.9443	8.40878	5.6692	0.754772	0.801389
						2014	12	20	354	11.3	3.6	7.45	77.5	12.09	7.44743	5.36773	0.794914	0.981144
						2014	12	21	355	8.8	-1	3.9	92.5	5.30816	4.16159	2.65874	0.33838	0.399904
						2014	12	22	356	5	-0.7	2.15	89	5.91888	2.69901	2.26098	0.26455	0.186115
						2014	12	23	357	6.2	0.1	3.15	80.5	3.90971	1.90794	1.545	0.189837	0.215096
						2014	12	24	358	7.8	-2	2.9	90.5	4.41371	3.46035	2.21074	0.268396	0.278758
						2014	12	25	359	9	-3.3	2.85	75	8.7972	8.65644	4.93647	0.597867	0.531904
						2014	12	26	360	4.2	-2.8	0.7	91	9.22817	5.16778	3.90647	0.423862	0.100314
						2014	12	27	361	6.4	-1.9	2.25	89	8.41114	5.585	3.87716	0.455928	0.310337
						2014	12	28	362	12	2.3	7.15	80.5	6.81425	5.28786	3.39566	0.496892	0.738285
						2014	12	29	363	8.4	0.2	4.3	90.5	2.01961	1.32487	0.925327	0.119938	0.235856
						2014	12	30	364	15.3	6.2	10.75	75	8.13702	5.92375	3.92741	0.657627	1.03712
						2014	12	31	365	7.2	1.4	4.3	91	4.7267	2.19319	1.82134	0.236076	0.295829
																	973.319	1992.54
																	ETo-HS	ETo-TURC (Ousman Couly (2016)

## Sheet: 2015
	BATMAN					year	month	day	DOY	Tmax	Tmin	Tmean	RHmean.	Ra	Rs=0.16(Tmax-Tmin)^0.5*Ra	Rs=from meteorological station	ETo-HS	ETo-TURC (Ousman Couly (2016)
	DOY	246					#	#		°C	°C	°C	%	MJ m-2 day-1*(0.408 mm day-1)
	φ (-)	36.71	0.64071			2015	1	1	1	11.3	5.1	8.2	82.5	18.0345	8.94512	7.18489	1.09562	1.20911
	tan(φ)		0.745649			2015	1	2	2	10.9	6.3	8.6	81	17.4966	6.43874	6.00416	0.92966	0.963459
	sin(φ)		0.597765			2015	1	3	3	12.7	4.5	8.6	77	11.679	7.66145	5.35099	0.828525	1.10158
	cos(φ)		0.801671			2015	1	4	4	10.4	4.7	7.55	74	11.8378	5.39802	4.52196	0.672315	0.777193
	dr	0.984766		(1+0.033*cos(2*3.14/365*DOY))		2015	1	5	5	8.6	5.6	7.1	78.5	29.4616	7.07079	8.16465	1.19235	0.912349
	δ	0.120494		(0.409*sin(2*3.14/365*DOY-1.39))		2015	1	6	6	11.6	7.9	9.75	67.5	26.2839	7.78002	8.08928	1.30707	1.20534
	tan(δ)	0.121081				2015	1	7	7	10	3.3	6.65	74.5	11.131	5.9662	4.60989	0.661054	0.767106
	sin(δ)	0.120203				2015	1	8	8	5.8	0.8	3.3	77.5	21.4867	8.5947	7.68733	0.951319	0.597292
	cos(δ)	0.992749				2015	1	9	9	1.3	-7.5	-3.1	80	17.2019	12.1101	8.16465	0.703919	-1.14675
	X	0.991849				2015	1	10	10	-0.1	-11.5	-5.8	73	15.9506	14.5469	8.61685	0.606454	-3.25143		-
	ωs (eq. 25)	1.49314		(acos{(-1*tan(-0.35)*tan(0.409*sin(2*3.14/365*DOY-1.39))))		2015	1	11	11	2.4	-7.7	-2.65	77	18.6258	15.0496	9.47099	0.841543	-1.1401
	sin ωs	0.996986				2015	1	12	12	3.6	-7	-1.7	77.5	15.9749	13.5467	8.32166	0.785785	-0.619589
	sin φ*sin δ	-0.0718532		(sin(0.35)*sin(0.409*sin(2*3.14/365*DOY-1.39)))		2015	1	13	13	6.4	-5.7	0.35	74.5	16.4753	15.9481	9.16953	0.976094	0.127501
	cos φ*cos δ	0.795859		(cos(0.35)*cos(0.409*sin(2*3.14/365*DOY-1.39))		2015	1	14	14	6.7	-4.6	1.05	79	14.6664	13.2585	7.88831	0.872094	0.311273
	Gsc	0.082				2015	1	15	15	3.5	-3.6	-0.05	94	14.7904	8.40093	6.30562	0.656439	-0.0108769
						2015	1	16	16	5	2.8	3.9	85	35.8858	6.3159	8.51636	1.08388	0.537711
	Ra	25.4105				2015	1	17	17	3.1	-0.6	1.25	91.5	27.9164	8.26326	8.59172	0.959938	0.246885
						2015	1	18	18	4.4	-3.1	0.65	90	16.9132	10.1479	7.41099	0.801938	0.157568
						2015	1	19	19	7.9	-6.1	0.9	72	14.9809	16.7786	8.96855	0.983631	0.331091
						2015	1	20	20	9.9	-5.4	2.25	72.5	15.0529	18.4247	9.42075	1.10782	0.829509
						2015	1	21	21	7.7	-5	1.35	75.5	15.9052	16.1597	9.06904	1.01859	0.467125
						2015	1	22	22	10.1	-3.3	3.4	75	13.4254	14.392	7.86319	0.977693	0.944132
						2015	1	23	23	11.1	-5.7	2.7	71	15.4186	20.7226	10.1116	1.21574	1.07877
						2015	1	24	24	11.8	-5.2	3.3	69.5	13.0809	17.79	8.62941	1.0679	1.11132
						2015	1	25	25	13.2	-4.7	4.25	65.5	13.5364	19.3841	9.16325	1.18502	1.46972
						2015	1	26	26	16.5	-3.7	6.4	60.5	14.1835	22.9206	10.1995	1.44765	2.31874
						2015	1	27	27	12.6	-2	5.3	70.5	3.45173	4.03162	2.11025	0.2859	0.495459
						2015	1	28	28	7.5	-2.9	2.3	84.5	3.55419	2.95708	1.83391	0.216193	0.20801
						2015	1	29	29	8.2	2.1	5.15	84.5	21.9961	10.7341	8.69221	1.16999	1.01606
						2015	1	30	30	11.4	0.5	5.95	79.5	18.7853	16.3808	9.92319	1.38224	1.62622
						2015	1	31	31	10.4	-0.8	4.8	78.5	21.1593	18.9588	11.33	1.50178	1.58185
						2015	2	1	32	14.3	2.8	8.55	67.5	18.9137	17.4006	10.2623	1.58597	2.19363
						2015	2	2	33	14.3	-2.2	6.05	72.5	16.7951	22.1695	10.9155	1.52686	2.16146
						2015	2	3	34	16	-2.3	6.85	69.5	14.6631	21.4668	10.0362	1.45096	2.28937
						2015	2	4	35	11.4	0.9	6.15	75	23.3554	19.6185	12.1088	1.70088	1.95684
						2015	2	5	36	12.6	-1.2	5.7	76	18.8085	20.7646	11.1793	1.54081	1.95092
						2015	2	6	37	12.5	-2.7	4.9	68.5	16.4313	19.9805	10.2498	1.36461	1.68468
						2015	2	7	38	14.6	-0.3	7.15	68	7.17936	8.5578	4.43403	0.64884	1.0655
						2015	2	8	39	13.7	2.1	7.9	69	19.9615	18.5243	10.8778	1.63962	2.20456
						2015	2	9	40	10.9	6	8.45	78.5	33.2666	13.0405	11.7822	1.81395	1.69017
						2015	2	10	41	11.5	5.6	8.55	78.5	20.2973	9.58032	7.88831	1.21908	1.31347
						2015	2	11	42	12.9	7	9.95	57	21.1053	9.9617	8.20233	1.33496	1.48992
						2015	2	12	43	8.9	4.2	6.55	73.5	22.0895	8.30564	7.66221	1.09426	0.979505
						2015	2	13	44	10.4	4	7.2	74.5	27.1533	13.9025	10.9909	1.61154	1.60789
						2015	2	14	45	9.2	1.4	5.3	77	32.9165	20.5399	14.7089	1.99279	1.83157
						2015	2	15	46	11.6	0.6	6.1	74.5	18.2263	16.0391	9.67197	1.35575	1.62475
						2015	2	16	47	9.1	1.8	5.45	78	9.82109	5.73551	4.24562	0.578938	0.646514
						2015	2	17	48	10.3	4.9	7.6	75	12.8378	5.54593	4.77318	0.711065	0.796029
						2015	2	18	49	11	3.9	7.45	70.5	31.5253	17.9064	13.4403	1.99039	2.05709
						2015	2	19	50	10.3	3.7	7	78	38.4426	20.2977	15.8017	2.29839	2.20824
						2015	2	20	51	6.6	2.3	4.45	79.5	46.9453	16.1492	15.5756	2.03256	1.29362
						2015	2	21	52	7.6	0.2	3.9	72.5	37.8636	22.4153	16.48	2.09742	1.56756
						2015	2	22	53	12.4	-3.3	4.55	66.5	24.5684	30.8579	15.5756	2.0417	2.37713
						2015	2	23	54	14.2	-3.2	5.5	62	9.97483	13.885	6.65733	0.909754	1.32865
						2015	2	24	55	12.1	-0.6	5.75	66.5	11.4553	11.6386	6.53172	0.902166	1.17933
						2015	2	25	56	8.6	4.6	6.6	75.5	26.0248	8.32794	8.32794	1.19178	0.986811
						2015	2	26	57	14.2	0.4	7.3	72	27.1139	29.9337	16.1158	2.37243	3.24976
						2015	2	27	58	16.8	-1.7	7.55	65	23.7463	35.1445	16.3419	2.42967	3.86463
						2015	2	28	59	12.5	-2.2	5.15	76.5	23.1584	27.2343	14.2065	1.91222	2.32338
						2015	3	1	60	17	-1.2	7.9	68	23.2051	33.7866	15.8394	2.38748	3.83676
						2015	3	2	61	13.6	1.2	7.4	74	27.1767	26.9593	15.3119	2.26306	2.97496
						2015	3	3	62	16.2	1.1	8.65	69	16.0008	19.3289	9.94831	1.54327	2.42854
						2015	3	4	63	13.6	3.2	8.4	71.5	36.3209	30.219	18.741	2.8798	3.59541
						2015	3	5	64	11.9	-1.3	5.3	55	31.3534	33.1092	18.226	2.46929	2.84888
						2015	3	6	65	15.5	-3.9	5.8	55.5	24.8406	38.5526	17.5058	2.42305	3.51324
						2015	3	7	66	17.1	-2.5	7.3	60	24.5421	38.4821	17.3844	2.55919	4.11725
						2015	3	8	67	18.2	-0.5	8.85	59.5	23.274	34.8179	16.1032	2.51697	4.24557
						2015	3	9	68	20.1	-0.6	9.75	60.5	21.0858	34.9181	15.3495	2.48019	4.51947
						2015	3	10	69	20.4	-0.1	10.15	54	9.46716	15.5262	6.85831	1.12426	2.20395
						2015	3	11	70	20.1	-2.1	9	55	24.5598	43.6182	18.5149	2.91021	5.31358
						2015	3	12	71	18.2	7.6	12.9	56.5	32.7937	27.809	17.083	3.07588	4.28553
						2015	3	13	72	15.8	7.5	11.65	75	20.6554	13.7152	9.52124	1.64455	2.14186
						2015	3	14	73	17.7	2.8	10.25	71.5	16.5552	19.7338	10.2247	1.68209	2.74635
						2015	3	15	74	19.9	1.9	10.9	61	30.4948	43.9125	20.7005	3.48443	6.00163
						2015	3	16	75	13.9	5.7	9.8	68.5	44.6326	29.279	20.4493	3.31021	3.8427
						2015	3	17	76	11.6	0.9	6.25	78.5	38.7361	33.1581	20.2735	2.85964	3.2138
						2015	3	18	77	15.8	-0.5	7.65	68.5	24.987	32.583	16.1409	2.40926	3.63033
						2015	3	19	78	11.4	1.6	6.5	77	38.3692	30.0814	19.2183	2.73899	3.01514
						2015	3	20	79	16.1	6.8	11.45	70	33.981	25.2819	16.5805	2.84441	3.67322
						2015	3	21	80	14.7	4.7	9.7	65	20.9034	16.7227	10.5764	1.70583	2.29027
						2015	3	22	81	10.7	0.6	5.65	74	29.3962	23.7521	14.9476	2.05581	2.19188
						2015	3	23	82	14.5	-1.4	6.55	64.5	26.264	33.4079	16.7564	2.39302	3.34471
						2015	3	24	83	10.9	7	8.95	71.5	60.5043	18.8774	19.1178	2.99937	2.42897
						2015	3	25	84	10.8	5.1	7.95	80.5	50.0474	22.8216	19.1178	2.88725	2.67515
						2015	3	26	85	17.9	4.8	11.35	72	37.069	38.8483	21.4667	3.67006	5.46647
						2015	3	27	86	20.4	1.7	11.05	60.5	30.3543	45.41	21.002	3.55365	6.24611
						2015	3	28	87	18.3	4.8	11.55	68.5	24.9563	26.9528	14.6712	2.52548	3.91668
						2015	3	29	88	15.7	10.6	13.15	73.5	49.016	19.9985	17.711	3.21493	3.19872
						2015	3	30	89	18.7	9	13.85	67.5	14.2419	11.0517	7.09696	1.31739	1.95577
						2015	3	31	90	18.9	3.5	11.2	66.5	33.0887	40.7652	20.7759	3.53367	5.67914
						2015	4	1	91	16.4	7.9	12.15	74.5	34.9518	23.7672	16.3042	2.86394	3.58715
						2015	4	2	92	18.5	6.5	12.5	74.5	40.2491	38.6392	22.3083	3.9644	5.73911
						2015	4	3	93	18.1	5.1	11.6	71.5	37.527	39.0281	21.6489	3.73294	5.55867
						2015	4	4	94	20.5	8.1	14.3	66.5	36.3843	36.0932	20.4996	3.85938	5.777
						2015	4	5	95	18.3	2.6	10.45	55	29.2046	36.681	18.5149	3.06767	4.93512
						2015	4	6	96	21.2	0.5	10.85	60	20.8787	34.5752	15.1988	2.55389	4.77073
						2015	4	7	97	24.1	3.3	13.7	58	21.1383	35.1742	15.4249	2.84971	5.51432
						2015	4	8	98	23	10.3	16.65	56	36.2604	36.8405	20.6754	4.17745	6.34881
						2015	4	9	99	27.7	12.1	19.9	45	37.1096	46.3128	23.4514	5.18535	9.16691
						2015	4	10	100	22.1	9.4	15.75	55	27.757	28.2011	15.8269	3.11426	4.80964
						2015	4	11	101	18.9	4.1	11.5	60	31.2223	36.9672	19.2183	3.30256	5.2543
						2015	4	12	102	12.7	1.4	7.05	78.5	29.9634	27.0869	16.1158	2.3488	2.89189
						2015	4	13	103	11.6	6.8	9.2	79.5	58.5512	22.4837	20.5247	3.25018	2.89604
						2015	4	14	104	12.9	7.8	10.35	75	53.8134	21.9559	19.4444	3.21027	3.04344
						2015	4	15	105	18.1	1.3	9.7	61	28.7303	38.6136	18.8415	3.0389	4.95529
						2015	4	16	106	20.2	1.4	10.8	67.5	22.9223	34.4752	15.9022	2.66742	4.74497
						2015	4	17	107	23.4	2.3	12.85	59	33.8911	57.2082	24.9085	4.4776	8.48166
						2015	4	18	108	24.4	3.7	14.05	59	27.591	45.6907	20.085	3.75189	7.16382
						2015	4	19	109	24.8	6.7	15.75	61	33.5289	48.5499	22.8233	4.49097	8.04063
						2015	4	20	110	21.8	11.2	16.5	61.5	46.8757	39.7506	24.4186	4.91227	6.79411
						2015	4	21	111	23.4	11.2	17.3	55.5	41.7384	40.7367	23.3258	4.80188	7.11083
						2015	4	22	112	18.5	4.2	11.35	68.5	36.9951	42.3224	22.3837	3.82682	5.93036
						2015	4	23	113	18.3	7.8	13.05	62.5	43.5127	36.5507	22.5596	4.08182	5.57293
						2015	4	24	114	13.8	3.5	8.65	70	41.2423	33.9837	21.1778	3.2853	4.09013
						2015	4	25	115	18.6	0	9.3	62.5	31.3459	46.6427	21.63	3.43791	5.78175
						2015	4	26	116	21.9	1.8	11.85	63	23.5695	37.8998	16.9071	2.9401	5.47123
						2015	4	27	117	23.4	5.1	14.25	57	22.9673	33.6241	15.7201	2.95496	5.39374
						2015	4	28	118	27.4	8	17.7	53.5	33.9011	52.6145	23.891	4.97429	9.17932
						2015	4	29	119	27.1	7.1	17.1	59	32.8621	52.5793	23.5142	4.81308	9.0281
						2015	4	30	120	30.4	12.4	21.4	48	36.4346	52.4658	24.7326	5.68622	10.227
						2015	5	1	121	28.5	6.1	17.3	54.5	32.9095	58.9739	24.921	5.13028	10.1389
						2015	5	2	122	26.6	8.3	17.45	52	35.7493	52.337	24.4688	5.05872	9.07312
						2015	5	3	123	24.8	4.8	14.8	56	32.0195	51.2311	22.9113	4.38061	8.20931
						2015	5	4	124	24.4	12.8	18.6	58	46.1927	42.8668	25.1722	5.37392	7.71491
						2015	5	5	125	25.5	11.1	18.3	57.5	41.9971	48.3806	25.4988	5.39878	8.59819
						2015	5	6	126	25.3	6.7	16	53	32.1104	47.7803	22.1576	4.39246	7.97926
						2015	5	7	127	25.1	3.6	14.35	53	31.1193	53.5253	23.0871	4.3533	8.42946
						2015	5	8	128	28.4	3.7	16.05	40.5	25.906	51.1902	20.6	4.08973	9.69638
						2015	5	9	129	28.7	18.1	23.4	65	40.2205	34.107	20.9517	5.06274	6.83783
						2015	5	10	130	23.1	12.6	17.85	64.5	35.8083	30.079	18.5652	3.88174	5.41879
						2015	5	11	131	24.7	12.6	18.65	67.5	43.7838	42.3827	24.3683	5.20945	7.64098
						2015	5	12	132	24	12.8	18.4	64	36.9233	33.0832	19.771	4.19764	6.00683
						2015	5	13	133	26.1	8.2	17.15	67.5	36.0352	51.6024	24.3935	5.00021	8.87887
						2015	5	14	134	22.7	10.9	16.8	64	45.5253	42.9759	25.0215	5.07759	7.3806
						2015	5	15	135	24.6	7.1	15.85	56	17.2653	24.1714	11.5561	2.28068	4.18266
						2015	5	16	136	27.4	6	16.7	58.5	33.6697	57.6425	24.921	5.04258	9.75505
						2015	5	17	137	29.7	8.5	19.1	55	28.7812	48.8129	21.203	4.58871	8.83859
						2015	5	18	138	30.7	8.4	19.55	53	22.4765	40.0981	16.9825	3.72014	7.40031
						2015	5	19	139	32	8.5	20.25	52.5	33.8467	63.6318	26.2525	5.85859	11.7041
						2015	5	20	140	33.4	9.5	21.45	48	30.4148	58.1531	23.7905	5.47661	11.304
						2015	5	21	141	35.9	14	24.95	58.5	34.0548	59.664	25.4988	6.39329	11.9559
						2015	5	22	142	27.2	14.8	21	54	44.7112	44.3535	25.1911	5.73253	8.39853
						2015	5	23	143	29.5	12.1	20.8	58.5	38.2431	53.2344	25.524	5.77834	9.96458
						2015	5	24	144	30.4	9.9	20.15	54.5	34.6783	56.8723	25.122	5.59157	10.4782
						2015	5	25	145	32	12.7	22.35	43.5	36.2047	55.9001	25.4486	5.99263	11.7562
						2015	5	26	146	32.7	14.2	23.45	51	24.6406	36.4682	16.9573	4.10251	7.28995
						2015	5	27	147	30.6	9.6	20.1	46.5	35.9418	60.3823	26.353	5.85783	11.6447
						2015	5	28	148	33.8	16.6	25.2	47.5	41.1907	56.6784	27.3327	6.89318	11.8282
						2015	5	29	149	31.9	10	20.95	51.5	35.0613	61.4275	26.2525	5.96637	11.4747
						2015	5	30	150	31.5	10.1	20.8	50	37.7766	64.6735	27.9608	6.33001	12.0249
						2015	5	31	151	31	9.4	20.2	47.5	37.1621	64.2161	27.6342	6.15883	12.217
						2015	6	1	152	32.7	8.6	20.65	48.5	33.2308	64.0691	26.1018	5.88619	12.1344
						2015	6	2	153	31.6	16.3	23.95	55	41.6463	50.9751	26.0641	6.38215	10.1151
						2015	6	3	154	34.5	17	25.75	40	39.3348	55.0687	26.3279	6.72468	12.7963
						2015	6	4	155	35.1	10.8	22.95	43.5	35.8808	69.7523	28.2999	6.76365	14.7189
						2015	6	5	156	35.1	12.3	23.7	43	32.5785	59.4232	24.8896	6.05807	12.8458
						2015	6	6	157	33.6	11.8	22.7	42	35.562	62.0202	26.5665	6.31041	13.3343
						2015	6	7	158	32.8	11.5	22.15	41.5	34.2249	58.3193	25.2727	5.92157	12.5214
						2015	6	8	159	36.3	12	24.15	39.5	34.2723	66.6254	27.0313	6.65069	15.1112
						2015	6	9	160	36.5	14.2	25.35	32.5	33.0498	58.9608	24.9713	6.3196	14.8627
						2015	6	10	161	36.3	18.4	27.35	38.5	38.3732	54.9505	25.9761	6.87861	13.2956
						2015	6	11	162	33.9	13.4	23.65	39	30.0661	49.3083	21.7808	5.295	11.2818
						2015	6	12	163	33.8	13.9	23.85	38	37.9161	60.3625	27.0627	6.6108	13.9227
						2015	6	13	164	35.4	13.2	24.3	33	36.2232	64.3325	27.3076	6.7427	15.8238
						2015	6	14	165	36.6	13.9	25.25	32	36.4647	66.2199	27.7975	7.01854	16.7003
						2015	6	15	166	36	15	25.5	41.5	35.7191	60.0081	26.1897	6.65099	13.5924
						2015	6	16	167	35	14.8	24.9	39.5	36.4545	58.9105	26.2148	6.56512	13.5712
						2015	6	17	168	34.4	17.3	25.85	32.5	41.5577	56.851	27.496	7.03918	14.453
						2015	6	18	169	36.6	18.9	27.75	30.5	41.0152	58.0776	27.6091	7.37579	15.4802
						2015	6	19	170	36.6	18.8	27.7	28.5	41.3092	58.8244	27.8854	7.44143	16.0124
						2015	6	20	171	36.5	16.7	26.6	38	39.2115	62.111	27.9168	7.26971	14.9076
						2015	6	21	172	35.6	14.9	25.25	37	35.8562	59.3779	26.1018	6.59039	14.1738
						2015	6	22	173	36.3	15.8	26.05	31	37.9814	62.2894	27.5149	7.07628	16.1026
						2015	6	23	174	36.3	14.5	25.4	29	36.8063	64.1901	27.496	6.96661	16.7935
						2015	6	24	175	36.3	16.6	26.45	30.5	38.5061	60.6856	27.3453	7.09682	15.8774
						2015	6	25	176	36.3	15.8	26.05	33	36.7936	60.3416	26.6544	6.855	15.2645
						2015	6	26	177	36.6	19.4	28	42.5	40.6417	55.923	26.9685	7.24419	12.9652
						2015	6	27	178	34.1	14.2	24.15	36	37.5554	59.7882	26.8052	6.59506	14.1993
						2015	6	28	179	36.6	16.7	26.65	29.5	35.5931	56.6643	25.4046	6.62297	15.0672
						2015	6	29	180	36.6	19.4	28	33	41.2096	56.7044	27.3453	7.34541	14.7506
						2015	6	30	181	35	15.4	25.2	29	38.418	60.2394	27.2134	6.86309	15.7461
						2015	7	1	182	37.3	12.5	24.9	26.5	34.3034	68.058	27.3327	6.84509	18.1266
						2015	7	2	183	37.4	14.2	25.8	23.5	36.526	67.7923	28.1492	7.19814	18.885
						2015	7	3	184	37.3	15.4	26.35	28	36.7054	64.3078	27.4835	7.11656	17.2389
						2015	7	4	185	39.1	17.5	28.3	26	38.4965	66.522	28.6265	7.73994	18.6677
						2015	7	5	186	37.3	19.1	28.2	24	40.0431	58.3027	27.3327	7.3741	16.7604
						2015	7	6	187	37.3	17.7	27.5	27	37.8062	59.2802	26.7801	7.11504	16.3549
						2015	7	7	188	38.2	18.3	28.25	27.5	39.3856	62.7019	28.1115	7.59245	17.3364
						2015	7	8	189	37.5	19.5	28.5	23.5	42.4669	61.1524	28.8275	7.82809	17.7074
						2015	7	9	190	37.3	18.5	27.9	31.5	38.5117	57.9216	26.7172	7.16104	15.2964
						2015	7	10	191	37.3	17.8	27.55	24.5	37.743	58.8791	26.667	7.09283	16.6955
						2015	7	11	192	37.3	18.7	28	29.5	38.4452	57.2064	26.5288	7.1261	15.475
						2015	7	12	193	37.7	18.9	28.3	26.5	37.8237	56.8868	26.2399	7.09466	15.9608
						2015	7	13	194	37.3	18.8	28.05	25.5	37.9649	56.188	26.1269	7.02579	15.8913
						2015	7	14	195	37.3	21.4	29.35	21	40.1245	51.0384	25.5993	7.0791	15.4149
						2015	7	15	196	37.7	23.6	30.65	27	44.5949	50.3031	26.7926	7.61337	14.4881
						2015	7	16	197	37.3	20.5	28.9	27	40.2799	54.1362	26.4158	7.23516	15.2447
						2015	7	17	198	37.3	20.1	28.7	26	37.5373	51.6513	24.9085	6.7931	14.6926
						2015	7	18	199	37.3	26.3	31.8	25	47.4831	41.7851	25.1974	7.33001	12.5426
						2015	7	19	200	37.3	18.9	28.1	22.5	37.9947	55.9282	26.0766	7.01992	16.3328
						2015	7	20	201	37.3	20.2	28.75	25.5	38.5012	52.6696	25.4737	6.95472	15.0597
						2015	7	21	202	37.3	16.4	26.85	23.5	32.8336	54.8978	24.0166	6.28929	15.6251
						2015	7	22	203	37.5	17.4	27.45	22	35.3368	56.8216	25.3481	6.72716	16.5331
						2015	7	23	204	38.2	19.1	28.65	23	34.0765	52.0689	23.8282	6.4915	15.2702
						2015	7	24	205	38.3	22.5	30.4	21.5	32.2524	40.767	20.5121	5.79863	12.5181
						2015	7	25	206	37.6	20.2	28.9	20.5	36.0223	50.1431	24.0418	6.58493	15.1518
						2015	7	26	207	38.2	18.7	28.45	25	34.5785	53.9425	24.4311	6.6271	15.4355
						2015	7	27	208	37.3	19.4	28.35	24.5	36.5919	52.3996	24.7703	6.70457	15.0711
						2015	7	28	209	37.3	19.2	28.25	23.5	35.5219	51.4357	24.1799	6.53059	14.9412
						2015	7	29	210	38.9	22.5	30.7	22	37.4532	49.1387	24.2679	6.90305	14.9357
						2015	7	30	211	38.3	20.3	29.3	22	33.6775	48.4955	22.861	6.31516	14.5204
						2015	7	31	212	37.3	22.4	29.85	22.5	40.1271	47.8315	24.7829	6.926	14.3462
						2015	8	1	213	40.2	18.3	29.25	30.5	31.421	55.0496	23.5268	6.49217	14.9705
						2015	8	2	214	40.2	20.6	30.4	25	32.912	51.606	23.3132	6.59048	15.1268
						2015	8	3	215	40.2	20.6	30.4	20.5	33.0539	51.8284	23.4137	6.61889	15.909
						2015	8	4	216	40.2	19.6	29.9	23	31.0308	51.1388	22.5344	6.30424	15.2267
						2015	8	5	217	40.2	20.4	30.3	24	31.8014	50.3735	22.6412	6.38723	14.9189
						2015	8	6	218	40.2	18.2	29.2	22.5	29.9938	52.789	22.5093	6.2048	15.6544
						2015	8	7	219	40.2	21.3	30.75	26	31.5657	47.7273	21.9566	6.25206	13.9388
						2015	8	8	220	40.2	21.4	30.8	23.5	27.0868	40.7385	18.7913	5.35624	12.3086
						2015	8	9	221	40.2	20.6	30.4	26	26.0317	40.8177	18.4395	5.21273	11.9604
						2015	8	10	222	40.2	20	30.1	28.5	31.4064	50.7528	22.5847	6.34479	14.2909
						2015	8	11	223	40.2	20.5	30.35	28.5	31.095	49.0057	22.0822	6.23602	13.8564
						2015	8	12	224	40.2	20.9	30.55	24	33.8905	52.327	23.8219	6.75525	15.5164
						2015	8	13	225	40.2	18.7	29.45	26.5	32.2932	55.5444	23.958	6.63927	15.8114
						2015	8	14	226	40.2	20	30.1	29	31.9304	51.5996	22.9615	6.45066	14.4406
						2015	8	15	227	40.2	19.9	30.05	28.5	29.7433	48.3032	21.4416	6.01738	13.6209
						2015	8	16	228	40.2	20.8	30.5	29.5	28.447	44.1497	20.0474	5.679	12.4227
						2015	8	17	229	40.2	23.9	32.05	30.5	34.0289	44.3737	21.9817	6.42681	12.545
						2015	8	18	230	40.2	22.2	31.2	23	33.5109	48.2557	22.748	6.53743	14.6053
						2015	8	19	231	40.2	20.7	30.45	21.5	29.8495	46.5653	21.0899	5.96816	14.2195
						2015	8	20	232	40.2	20.1	30.15	24	28.6827	46.1218	20.5749	5.78622	13.6873
						2015	8	21	233	40.2	22.4	31.3	21	24.3948	34.7382	16.4675	4.74216	10.9155
						2015	8	22	234	40.2	22.5	31.35	25	27.5239	38.9738	18.5275	5.34082	11.6852
						2015	8	23	235	40.2	21.7	30.95	31	22.0671	32.6593	15.1862	4.34203	9.22517
						2015	8	24	236	40.2	22.2	31.2	42.5	11.3615	16.3606	7.71245	2.21644	4.2765
						2015	8	25	237	35	22.4	28.7	25.5	28.641	28.8702	16.2665	4.43624	8.5094
						2015	8	26	238	34.8	20.3	27.55	26.5	28.7604	33.362	17.5226	4.66062	9.5047
						2015	8	27	239	35.6	14.1	24.85	27.5	26.057	44.818	19.3314	4.83559	11.9826
						2015	8	28	240	36.1	15.9	26	26	24.5242	39.6312	17.6356	4.53037	11.0138
						2015	8	29	241	37.6	17.5	27.55	28.5	23.3769	37.5901	16.7689	4.46016	10.4107
						2015	8	30	242	40.2	16.6	28.4	23.5	26.7614	50.5255	20.801	5.63631	14.7141
						2015	8	31	243	40.2	16.7	28.45	29	26.9316	50.6315	20.8889	5.66626	13.9119
						2015	9	1	244	37.2	17	27.1	27	28.4719	46.0106	20.4744	5.39171	12.7522
						2015	9	2	245	36.9	16.4	26.65	24	27.6039	45.2704	19.9971	5.21323	12.8835
						2015	9	3	246	37.9	16.6	27.25	21.5	27.1486	46.2612	20.0474	5.29688	13.6034
						2015	9	4	247	36.9	16.3	26.6	27	28.8687	47.5756	20.9643	5.45923	13.0795
						2015	9	5	248	36.9	18.9	27.9	26	26.1555	37.664	17.755	4.75887	10.7626
						2015	9	6	249	36.8	24.8	30.8	50.5	35.9205	34.4837	19.9092	5.67489	7.62458
						2015	9	7	250	36.9	19.6	28.25	32	27.2363	37.695	18.1255	4.8954	10.1274
						2015	9	8	251	37.4	16.8	27.1	26	27.8828	45.9508	20.2483	5.33217	12.8733
						2015	9	9	252	37.1	15.8	26.45	23.5	22.6749	38.638	16.7438	4.34546	11.1067
						2015	9	10	253	37.6	21	29.3	20.5	29.6736	39.4066	19.3439	5.3436	12.0938
						2015	9	11	254	36.9	20.1	28.5	20.5	29.8604	40.1324	19.5826	5.31764	12.1895
						2015	9	12	255	36.9	18.9	27.9	19	28.0892	40.4485	19.0676	5.1107	12.3741
						2015	9	13	256	37.1	18.3	27.7	23.5	23.2754	35.0062	16.1472	4.30899	10.2842
						2015	9	14	257	37.5	18.2	27.85	24	18.3704	28.3639	12.9127	3.45721	8.41496
						2015	9	15	258	36.9	15.7	26.3	24	24.6209	41.757	18.1381	4.69135	11.8708
						2015	9	16	259	36.9	15.5	26.2	21.5	24.6413	42.1859	18.2386	4.70665	12.2821
						2015	9	17	260	37.2	14.1	25.65	23	23.1456	42.773	17.7989	4.53578	12.1605
						2015	9	18	261	36.9	12.6	24.75	22.5	21.4282	41.6563	16.9008	4.2177	11.7611
						2015	9	19	262	36.9	16	26.45	24	24.5651	41.0729	17.9685	4.6633	11.7097
						2015	9	20	263	36.9	16.2	26.55	22.5	23.3635	38.6899	17.0076	4.42389	11.2514
						2015	9	21	264	36.9	17.6	27.25	26.5	24.2228	37.4001	17.0264	4.49869	10.5464
						2015	9	22	265	36.1	17.1	26.6	33	25.0707	38.1075	17.4849	4.55318	9.90307
						2015	9	23	266	34.8	14	24.4	29.5	8.98552	14.9519	6.55684	1.62284	4.22984
						2015	9	24	267	36	13.9	24.95	27	22.411	39.6226	16.8569	4.2265	10.7292
						2015	9	25	268	35.7	13.7	24.7	27	24.6043	43.3035	18.4647	4.60255	11.6318
						2015	9	26	269	35.7	13.3	24.5	31	19.3742	34.7185	14.6712	3.63978	8.99852
						2015	9	27	270	35	13.3	24.15	33.5	14.7631	25.6288	11.0034	2.70725	6.54997
						2015	9	28	271	34.8	14.1	24.45	26.5	22.6905	37.5755	16.5177	4.09303	10.1794
						2015	9	29	272	34.2	15.3	24.75	34	24.3424	36.8057	16.9322	4.22553	9.22363
						2015	9	30	273	34.4	19.9	27.15	49.5	20.5961	23.8915	12.5484	3.30817	5.22504
						2015	10	1	274	32.9	17	24.95	49	28.4297	36.1626	18.1381	4.54774	7.51168
						2015	10	2	275	31.4	19	25.2	61.5	30.5432	30.2988	17.2086	4.33992	6.29407
						2015	10	3	276	31.5	17	24.25	47.5	27.3378	31.7119	16.6559	4.10773	6.70524
						2015	10	4	277	31.7	16	23.85	42	25.9553	32.5998	16.4549	4.01956	7.35627
						2015	10	5	278	30.6	10.8	20.7	57	22.6183	35.8274	16.1032	3.63614	6.81557
						2015	10	6	279	29.6	13.3	21.45	67.5	25.6675	33.4705	16.5805	3.81686	6.48723
						2015	10	7	280	25	14.9	19.95	66	34.0897	27.5444	17.3342	3.83785	5.2439
						2015	10	8	281	26	11.9	18.95	63	28.0574	31.6487	16.8569	3.63331	5.83794
						2015	10	9	282	25.5	13.3	19.4	59	26.0725	25.4467	14.5708	3.17902	4.81413
						2015	10	10	283	26.1	10.8	18.45	51.5	24.5663	30.0692	15.3747	3.26875	5.49878
						2015	10	11	284	27	8.8	17.9	47.5	21.5397	31.3618	14.7027	3.07845	5.84357
						2015	10	12	285	29	9	19	53.5	18.8799	30.2078	13.5094	2.91575	5.59513
						2015	10	13	286	30.4	11.7	21.05	57.5	21.5675	32.265	14.9225	3.40016	6.21868
						2015	10	14	287	26.6	17.4	22	56.5	25.4686	18.7449	12.36	2.88516	3.84038
						2015	10	15	288	27.5	12.3	19.9	53	14.7701	17.9604	9.21349	2.0372	3.54415
						2015	10	16	289	28.2	9.6	18.9	43	18.6037	27.6823	12.8373	2.76318	5.66016
						2015	10	17	290	27.7	9	18.35	42.5	21.1318	31.6132	14.621	3.09994	6.36468
						2015	10	18	291	27	6.8	16.9	42	20.2971	32.8002	14.5959	2.97049	6.38495
						2015	10	19	292	28.7	7	17.85	42	18.5045	32.1238	13.792	2.88373	6.42188
						2015	10	20	293	27	10.9	18.95	46.5	22.3438	28.7788	14.3447	3.09183	5.60842
						2015	10	21	294	27.8	11.2	19.5	47	21.8313	28.992	14.2316	3.11337	5.67951
						2015	10	22	295	28	12.2	20.1	71.5	10.369	13.1064	6.59452	1.46585	2.69768
						2015	10	23	296	21.5	15	18.25	68	26.1276	13.5863	10.658	2.25346	2.66734
						2015	10	24	297	26.4	10.9	18.65	74.5	18.3254	22.7235	11.5436	2.46777	4.26328
						2015	10	25	298	20.6	15.3	17.95	76.5	31.7139	13.4467	11.6817	2.44935	2.62379
						2015	10	26	299	23.2	15.3	19.25	84.5	21.0043	13.2747	9.44587	2.05257	2.67705
						2015	10	27	300	19.3	13.4	16.35	75.5	27.1007	12.7916	10.5324	2.10953	2.40597
						2015	10	28	301	21	13.2	17.1	84.5	19.2552	12.0152	8.60428	1.7612	2.32934
						2015	10	29	302	16.3	13.4	14.85	75.5	32.3164	7.49741	8.80526	1.68614	1.47858
						2015	10	30	303	19.2	11.7	15.45	70	28.9531	17.3719	12.6866	2.47403	3.06117
						2015	10	31	304	21.5	7.8	14.65	58	19.7891	21.6888	11.7194	2.23043	3.64221
						2015	11	1	305	21.1	5.7	13.4	51.5	21.2656	26.1992	13.3523	2.44332	4.13779
						2015	11	2	306	19	5.1	12.05	55	18.9513	21.0739	11.3049	1.97915	3.19884
						2015	11	3	307	19.5	1.3	10.4	57.5	16.3227	23.7659	11.1416	1.84274	3.28186
						2015	11	4	308	20.1	1.8	10.95	57.5	14.9751	21.9235	10.2498	1.7283	3.14119
						2015	11	5	309	19.9	4.2	12.05	59	16.6827	20.9535	10.5764	1.85161	3.18221
						2015	11	6	310	21.4	6.3	13.85	65	18.1019	21.8671	11.2547	2.08917	3.56533
						2015	11	7	311	21.8	5.4	13.6	65.5	17.7961	23.3485	11.531	2.12356	3.74995
						2015	11	8	312	20.3	7.9	14.1	64.5	15.7398	15.6138	8.86807	1.65916	2.65923
						2015	11	9	313	18.7	6.6	12.65	65	17.017	16.4725	9.47099	1.69142	2.63265
						2015	11	10	314	15.7	5.5	10.6	64	21.1399	17.2501	10.8025	1.79932	2.48249
						2015	11	11	315	16	0.4	8.2	61.5	16.1795	20.1921	10.2247	1.55916	2.44142
						2015	11	12	316	19.5	2.1	10.8	62	13.626	18.9674	9.09416	1.52545	2.73256
						2015	11	13	317	19.5	2.3	10.9	52.5	9.06725	12.4765	6.01672	1.01277	1.9004
						2015	11	14	318	19.9	1.9	10.9	49.5	12.3977	17.8528	8.41587	1.41661	2.62038
						2015	11	15	319	19.1	-1.6	8.75	69	13.7869	22.8311	10.0362	1.5628	2.84625
						2015	11	16	320	16.2	2.5	9.35	87.5	15.4516	16.935	9.15069	1.45711	2.26463
						2015	11	17	321	12.8	8.6	10.7	71.5	29.6689	9.96874	9.72849	1.62614	1.55638
						2015	11	18	322	15.4	4.5	9.95	68	16.5501	14.4317	8.74246	1.42287	2.04253
						2015	11	19	323	13.8	5.2	9.5	69	10.2798	7.07253	4.82342	0.7723	1.10137
						2015	11	20	324	15.7	0.6	8.15	65.5	10.2126	12.3368	6.34959	0.966386	1.57449
						2015	11	21	325	16.8	0.1	8.45	68.5	8.79856	11.7549	5.75294	0.885701	1.54655
						2015	11	22	326	15.4	-0.7	7.35	68.5	11.1523	14.3642	7.15977	1.0561	1.67745
						2015	11	23	327	17	-0.8	8.1	65	5.9917	8.53218	4.04464	0.614395	1.15464
						2015	11	24	328	17.8	-1.9	7.95	72.5	10.6657	16.8091	7.57428	1.1439	2.02949
						2015	11	25	329	14.2	-1.2	6.5	60.5	10.4827	12.9147	6.58196	0.938058	1.40626
						2015	11	26	330	16.8	3.8	10.3	60	15.0021	15.6022	8.65453	1.42632	2.23285
						2015	11	27	331	15.6	9.3	12.45	69	25.4287	12.8161	10.2121	1.81179	2.09581
						2015	11	28	332	17.2	1.8	9.5	82.5	2.02053	2.48929	1.26866	0.203131	0.55045
						2015	11	29	333	13.8	3.3	8.55	77.5	10.3209	8.66959	5.35099	0.826956	1.21097
						2015	11	30	334	16.7	2.8	9.75	77	12.7606	14.1897	7.61197	1.22995	1.9881
						2015	12	1	335	15	6.7	10.85	68	22.5902	14.9999	10.4131	1.74973	2.22367
						2015	12	2	336	11.9	-0.2	5.85	70	14.8278	14.3533	8.25258	1.14469	1.43021
						2015	12	3	337	9.7	-0.1	4.8	62.5	16.4511	12.8977	8.24002	1.09221	1.12635
						2015	12	4	338	6.4	-4.3	1.05	63.5	15.12	12.9428	7.91343	0.874871	0.30487
						2015	12	5	339	7.5	-5.5	1	50.5	13.8916	14.4473	8.01392	0.883631	0.32041
						2015	12	6	340	11.7	-4.2	3.75	51	10.986	13.9742	7.00904	0.885878	0.99598
						2015	12	7	341	12.9	-4.2	4.35	59.5	10.0999	13.8167	6.68245	0.868116	1.10854
						2015	12	8	342	14	-4.1	4.95	61.5	10.4074	15.07	7.0844	0.945263	1.3199
						2015	12	9	343	14.5	-4.5	5	64	0.810476	1.23192	0.565245	0.0755857	0.257449
						2015	12	10	344	13.8	-4.2	4.8	65.5	11.2875	16.254	7.66221	1.01562	1.37858
						2015	12	11	345	13.2	-4.3	4.45	66	12.2358	17.1301	8.18977	1.06873	1.3632
						2015	12	12	346	13.1	-4.3	4.4	77.5	12.4215	17.2907	8.29026	1.07942	1.36264
						2015	12	13	347	6.4	-4.9	0.75	66.5	13.779	12.4562	7.41099	0.806284	0.21473
						2015	12	14	348	12.7	2	7.35	64	15	12.84	7.85062	1.158	1.52206
						2015	12	15	349	13.7	-2.8	5.45	75	10.3206	13.6231	6.70757	0.914653	1.29816
						2015	12	16	350	11.3	-2.7	4.3	81.5	11.498	12.8777	6.88343	0.892206	1.03378
						2015	12	17	351	8.4	-1.1	3.65	76.5	14.6202	11.1114	7.21001	0.90705	0.800931
						2015	12	18	352	10.8	-2	4.4	71.5	13.8242	14.156	7.91343	1.03035	1.14224
						2015	12	19	353	10.7	-4.7	3	65	10.0426	12.3725	6.30562	0.769235	0.74723
						2015	12	20	354	10.4	-4	3.2	63	12.4957	14.395	7.58684	0.934434	0.898524
						2015	12	21	355	11.4	-7	2.2	59.5	5.19773	7.65106	3.56732	0.418447	0.386244
						2015	12	22	356	12.3	-6	3.15	67	2.64266	3.86885	1.80878	0.222248	0.320596
						2015	12	23	357	11.8	-6.6	2.6	63	6.66188	9.80629	4.5722	0.547046	0.544796
						2015	12	24	358	11.8	-6.1	2.85	54.5	4.15648	5.95208	2.81366	0.340769	0.398049
						2015	12	25	359	15.2	-5.8	4.7	60	8.46295	14.2177	6.20513	0.818845	1.20611
						2015	12	26	360	12.1	-6.4	2.85	63	9.27218	13.7228	6.38099	0.772816	0.782669
						2015	12	27	361	12.8	-7	2.9	62	9.7742	15.4823	6.95879	0.844836	0.882544
						2015	12	28	362	12.4	-6.5	2.95	73	9.89587	14.9626	6.88343	0.837705	0.868778
						2015	12	29	363	7.4	-6	0.7	83.5	4.97554	5.33377	2.91415	0.316193	0.102609
						2015	12	30	364	4.2	1.2	2.7	94.5	27.3767	6.5704	7.58684	0.912185	0.409534
						2015	12	31	365	3.9	-0.7	1.6	95.5	9.95621	3.66389	3.41659	0.388743	0.171923
																	1244.26	2468.49
																	ETo-HS	ETo-TURC (Ousman Couly (2016)

## Sheet: 2016
	BATMAN					year	month	day	DOY	Tmax	Tmin	Tmean	RHmean.	Ra	Rs=0.16(Tmax-Tmin)^0.5*Ra	Rs=from meteorological station	ETo-HS	ETo-TURC (Ousman Couly (2016)
	DOY	246					#	#		°C	°C	°C	%	MJ m-2 day-1*(0.408 mm day-1)
	φ (-)	36.71	0.64071			2016	1	1	1	0.9	-3.1	-1.1	96	24.4547	7.8255	7.8255	0.766473	-0.243251
	tan(φ)		0.745649			2016	1	2	2	-0.1	-18.2	-9.15	75	5.24063	7.58843	3.56732	0.180978	-4.6928
	sin(φ)		0.597765			2016	1	3	3	-9.2	-23.6	-16.4	77	14.1921	16.3493	8.61685	0.0707529	66.9611
	cos(φ)		0.801671			2016	1	4	4	-5.2	-11	-8.1	78.5	23.0141	10.6786	8.86807	0.504509	-4.64665
	dr	0.984766		(1+0.033*cos(2*3.14/365*DOY))		2016	1	5	5	1.3	-5.5	-2.1	91.5	5.11798	2.78418	2.13537	0.196626	-0.245976
	δ	0.120494		(0.409*sin(2*3.14/365*DOY-1.39))		2016	1	6	6	1.8	0.1	0.95	97.5	11.5004	1.56406	2.39915	0.263832	0.0674683
	tan(δ)	0.121081				2016	1	7	7	5.6	0	2.8	97	1.95732	0.87688	0.741099	0.0895388	0.144677
	sin(δ)	0.120203				2016	1	8	8	12.2	4	8.1	82	5.37345	3.52498	2.46196	0.37398	0.610356
	cos(δ)	0.992749				2016	1	9	9	10.7	2.4	6.55	79.5	21.0914	14.0047	9.72221	1.38846	1.51649
	X	0.991849				2016	1	10	10	8.7	-2.5	3.1	75	3.53437	3.1668	1.89252	0.231983	0.279104		-
	ωs (eq. 25)	1.49314		(acos{(-1*tan(-0.35)*tan(0.409*sin(2*3.14/365*DOY-1.39))))		2016	1	11	11	7.1	-1.7	2.7	81	3.56388	2.50897	1.69155	0.203379	0.217477
	sin ωs	0.996986				2016	1	12	12	10.1	0	5.05	78.5	15.4145	12.4549	7.83806	1.05042	1.13566
	sin φ*sin δ	-0.0718532		(sin(0.35)*sin(0.409*sin(2*3.14/365*DOY-1.39)))		2016	1	13	13	7.1	0	3.55	86.5	8.42638	4.78618	3.59245	0.449838	0.407938
	cos φ*cos δ	0.795859		(cos(0.35)*cos(0.409*sin(2*3.14/365*DOY-1.39))		2016	1	14	14	12.1	4.2	8.15	76	22.6802	14.3339	10.1995	1.55234	1.79244
	Gsc	0.082				2016	1	15	15	10.4	0.6	5.5	79	22.9714	18.0095	11.5059	1.57233	1.67169
						2016	1	16	16	8.7	-2.4	3.15	77	21.0659	18.7065	11.2295	1.37979	1.11889
	Ra	25.4105				2016	1	17	17	9	-3.8	2.6	76	18.4761	18.9196	10.5764	1.26542	0.962143
						2016	1	18	18	12	-3	4.5	70.5	2.91891	3.5027	1.80878	0.23657	0.400093
						2016	1	19	19	9.9	3.1	6.5	77.5	6.83401	3.7177	2.85135	0.406373	0.544303
						2016	1	20	20	8	1.3	4.65	79	1.91077	1.02417	0.791343	0.104196	0.228452
						2016	1	21	21	7.9	0.3	4.1	85	28.1355	17.1064	12.4103	1.59402	1.27741
						2016	1	22	22	8.7	0.1	4.4	84	12.2608	8.43546	5.75294	0.74905	0.740038
						2016	1	23	23	9.6	0.8	5.2	78	2.27594	1.60226	1.08025	0.14572	0.29465
						2016	1	24	24	12.4	2	7.2	73	9.88356	8.22313	5.09977	0.747753	1.03689
						2016	1	25	25	4.6	-2.4	1.1	76	8.5457	4.78559	3.61757	0.401002	0.145626
						2016	1	26	26	2.6	-5.1	-1.25	68.5	16.4658	10.1429	7.3105	0.709599	-0.344746
						2016	1	27	27	1.2	-12.5	-5.65	66.5	18.2266	19.9764	10.7941	0.769184	-4.13361
						2016	1	28	28	2.9	-10.2	-3.65	56	19.1744	20.0947	11.1039	0.921512	-2.21163
						2016	1	29	29	5.3	-8.4	-1.55	60.5	23.1403	25.3618	13.7041	1.30608	-0.980711
						2016	1	30	30	8.8	-3.5	2.65	67.5	24.1307	23.7446	13.5408	1.62407	1.20245
						2016	1	31	31	10.1	-1.3	4.4	71	22.8795	20.8661	12.36	1.60931	1.61403
						2016	2	1	32	9.8	-4.7	2.55	71.5	16.3285	18.941	9.94831	1.18736	0.947295
						2016	2	2	33	6.2	3.3	4.75	85.5	3.04263	0.70589	0.829026	0.109643	0.208453
						2016	2	3	34	10.1	-1.4	4.35	67	2.87063	2.64098	1.55756	0.202343	0.329702
						2016	2	4	35	12.2	-4.2	4	67.5	21.3695	28.0368	13.8464	1.77036	1.96617
						2016	2	5	36	15.2	-2.8	6.2	66	12.0647	17.3731	8.18977	1.15279	1.76453
						2016	2	6	37	11.2	7.1	9.15	64	10.7397	3.52262	3.4794	0.54996	0.659222
						2016	2	7	38	8.8	4.5	6.65	80	12.3421	4.24567	4.09489	0.587204	0.603279
						2016	2	8	39	11.2	1.7	6.45	72.5	6.16393	4.68459	3.03976	0.432334	0.631505
						2016	2	9	40	12	-2.7	4.65	69.5	16.1351	18.9749	9.89807	1.30327	1.54529
						2016	2	10	41	12.3	-2.3	5	66	12.0811	14.1107	7.38587	0.987653	1.25555
						2016	2	11	42	11.6	-5.1	3.25	64.5	18.6921	24.9727	12.2219	1.50889	1.49401
						2016	2	12	43	13.2	1.6	7.4	60.5	17.6795	16.4066	9.63429	1.42393	1.89425
						2016	2	13	44	14.1	-2.6	5.75	66.5	6.9159	9.23964	4.52196	0.624577	0.973257
						2016	2	14	45	12.3	3.3	7.8	75.5	22.2609	16.0278	10.6852	1.60432	1.92144
						2016	2	15	46	13.1	2.4	7.75	80	22.0801	18.9005	11.5561	1.73169	2.21669
						2016	2	16	47	20	-0.2	9.9	66.5	21.3452	34.4938	15.3495	2.49369	4.50906
						2016	2	17	48	21.5	0.9	11.2	58.5	20.4969	33.779	14.8848	2.53168	4.75332
						2016	2	18	49	20.9	0.8	10.85	60	14.0028	22.5165	10.0446	1.68782	3.2017
						2016	2	19	50	20.3	0.8	10.55	62.5	19.3841	30.2392	13.6957	2.27722	4.13827
						2016	2	20	51	18.1	8.5	13.3	62.5	26.2246	20.1405	13.0006	2.37134	3.23874
						2016	2	21	52	17.1	5.7	11.4	69	18.1517	16.5544	9.80595	1.67935	2.4958
						2016	2	22	53	16.2	10.9	13.55	65	43.7515	18.5506	16.1158	2.96317	3.03681
						2016	2	23	54	12.5	9.2	10.85	79	55.9651	14.7748	16.2665	2.7333	2.19438
						2016	2	24	55	17	6.2	11.6	74	29.6698	25.6347	15.6008	2.69005	3.74804
						2016	2	25	56	16.1	7.4	11.75	78	31.0876	21.637	14.6712	2.54268	3.23086
						2016	2	26	57	19.1	3.9	11.5	69.5	21.6265	26.2979	13.4905	2.31827	3.81897
						2016	2	27	58	20.7	2.9	11.8	64.5	16.0957	22.9203	10.8653	1.88625	3.41372
						2016	2	28	59	19.1	8.9	14	71.5	25.9578	21.1816	13.2644	2.47391	3.48271
						2016	3	1	60	9.5	4.5	7	91	34.1962	13.6785	12.2344	1.77952	1.55535
						2016	3	2	61	21	0	10.5	61.5	16.9944	28.5506	12.4605	2.06819	3.91118
						2016	3	3	62	22.1	-0.3	10.9	60	15.2936	27.4062	11.5812	1.94942	3.84817
						2016	3	4	63	21.6	6.6	14.1	55	23.3648	28.0378	14.4786	2.70886	4.52538
						2016	3	5	64	18.5	10.8	14.65	67	29.1404	17.9505	12.9378	2.46232	3.06961
						2016	3	6	65	18.8	4.3	11.55	65.5	29.1487	33.8124	17.7592	3.05702	4.84176
						2016	3	7	66	12.8	4.5	8.65	75.5	36.1061	23.9745	16.6433	2.58187	2.95526
						2016	3	8	67	17.5	0	8.75	66.5	3.84715	5.38601	2.575	0.400969	0.853839
						2016	3	9	68	18.7	-0.7	9	64	18.4121	28.5756	12.9755	2.03952	3.56488
						2016	3	10	69	20.1	0.3	10.2	59	17.4754	27.681	12.4417	2.04317	3.73555
						2016	3	11	70	19.2	3.9	11.55	64.5	29.1424	35.6703	18.2386	3.13955	5.0923
						2016	3	12	71	17.4	8.3	12.85	75	31.4247	22.8772	15.1674	2.72653	3.57116
						2016	3	13	72	20.3	2.9	11.6	69	27.8542	38.7731	18.5903	3.20554	5.5242
						2016	3	14	73	21.2	0.6	10.9	59	24.5185	40.4065	17.8052	2.99707	5.54423
						2016	3	15	74	18.3	3	10.65	68	19.7895	24.2224	12.3851	2.06658	3.38676
						2016	3	16	75	14.2	9.1	11.65	77	46.5247	18.9821	16.8108	2.90363	2.8556
						2016	3	17	76	13.3	6.4	9.85	76	42.4393	23.4265	17.8366	2.89252	3.1354
						2016	3	18	77	13.7	0.1	6.9	63.5	24.2045	26.3344	14.2819	2.06895	2.77625
						2016	3	19	78	14.2	-4	5.1	57	6.49596	9.45812	4.43403	0.595528	0.908337
						2016	3	20	79	16.4	-0.7	7.85	59.5	29.9707	40.9999	19.8296	2.98312	4.58903
						2016	3	21	80	14.5	5.2	9.85	69.5	21.2253	15.7916	10.3565	1.67949	2.19724
						2016	3	22	81	14.4	-0.5	6.95	68	29.053	34.6312	17.9434	2.60464	3.60437
						2016	3	23	82	16.3	-2	7.15	58.5	24.4079	35.7332	16.7061	2.44464	3.78488
						2016	3	24	83	19.9	-0.4	9.75	60.5	22.6168	36.7297	16.3042	2.63444	4.7407
						2016	3	25	84	20.3	6.2	13.25	62.5	26.6775	30.0922	16.0278	2.9188	4.67924
						2016	3	26	85	18.6	11.8	15.2	50.5	27.8177	15.1328	11.6064	2.24635	2.68722
						2016	3	27	86	20.6	6.1	13.35	58	28.1212	32.6206	17.1332	3.13015	5.06702
						2016	3	28	87	16.5	8.8	12.65	69	35.2797	21.7323	15.6636	2.79734	3.37863
						2016	3	29	88	12.2	6	9.1	80	45.3543	22.4957	18.069	2.85072	2.87786
						2016	3	30	89	10.8	3.9	7.35	82.5	50.3294	27.7818	21.1527	3.12013	3.04532
						2016	3	31	90	14.5	-0.5	7	68.5	29.2905	35.1486	18.1506	2.64005	3.67308
						2016	4	1	91	16.7	-0.6	8.05	60.5	16.2386	22.4742	10.8066	1.6384	2.65943
						2016	4	2	92	17.6	-1.5	8.05	59	4.32917	6.61497	3.0272	0.458955	0.942441
						2016	4	3	93	20.7	-0.9	9.9	52	9.24266	15.9713	6.87296	1.11658	2.22611
						2016	4	4	94	22.5	5.7	14.1	61	28.5771	38.4076	18.741	3.50632	6.083
						2016	4	5	95	20.7	4.9	12.8	61.5	10.5072	13.2811	6.68245	1.19929	2.19398
						2016	4	6	96	24.1	2.2	13.15	60	20.5503	36.0041	15.3872	2.79312	5.51654
						2016	4	7	97	25.8	4	14.9	60.5	21.2531	37.0655	15.8771	3.045	6.0488
						2016	4	8	98	25.5	7.6	16.55	56.5	31.7859	45.5175	21.517	4.33487	7.74168
						2016	4	9	99	26.7	5.7	16.2	61	19.7355	33.1556	14.4703	2.88552	5.67318
						2016	4	10	100	26.8	7.6	17.2	60	25.8715	39.7386	18.1381	3.7233	6.92639
						2016	4	11	101	24.6	14.7	19.65	59	24.585	19.4713	12.3768	2.71849	3.7905
						2016	4	12	102	17.4	11.2	14.3	80.5	56.6889	28.1177	22.5847	4.25194	4.57033
						2016	4	13	103	19.7	7.5	13.6	72	37.5466	36.6455	20.9832	3.86428	5.7101
						2016	4	14	104	20.5	8.1	14.3	67.5	34.7345	34.4566	19.57	3.68438	5.52939
						2016	4	15	105	21.9	5.2	13.55	73	9.10593	12.1655	5.95391	1.09473	2.09738
						2016	4	16	106	24.4	5.3	14.85	80	28.9929	44.3011	20.2735	3.88221	7.15449
						2016	4	17	107	22.9	9.7	16.3	54.5	30.6115	32.3258	17.7948	3.55889	5.556
						2016	4	18	108	25.1	4	14.55	56	27.465	46.3608	20.1855	3.82986	7.39552
						2016	4	19	109	25	4.2	14.6	58	28.5574	47.5195	20.8387	3.95989	7.58557
						2016	4	20	110	26.6	3.5	15.05	54.5	27.8825	51.5269	21.4416	4.13106	8.32444
						2016	4	21	111	28.4	6.5	17.45	46.5	24.9008	43.6262	18.6447	3.85463	8.00207
						2016	4	22	112	27.8	7.9	17.85	56	31.1319	49.562	22.2204	4.646	8.70065
						2016	4	23	113	24.5	8.2	16.35	54.5	24.8509	32.4055	16.053	3.21524	5.57705
						2016	4	24	114	26.7	0.6	13.65	55	18.64	38.9202	15.2365	2.81044	6.05706
						2016	4	25	115	28.1	5.2	16.65	56.5	7.03244	12.8834	5.38448	1.08793	2.44188
						2016	4	26	116	27.8	8.2	18	48	30.1457	47.2684	21.3537	4.48357	8.58452
						2016	4	27	117	27.6	5.4	16.5	65.5	32.4076	57.556	24.4311	4.9148	9.68537
						2016	4	28	118	27.7	14.9	21.3	60.5	33.99	34.8057	19.457	4.46191	6.71136
						2016	4	29	119	25.9	11.2	18.55	59	31.7993	37.3959	19.5072	4.1588	6.76792
						2016	4	30	120	26	5.6	15.8	59	27.1153	44.2521	19.5952	3.8615	7.3696
						2016	5	1	121	26.5	8.1	17.3	58	32.8152	48.304	22.5219	4.63639	8.36728
						2016	5	2	122	27.4	10.2	18.8	72.5	26.2174	36.0752	17.397	3.73442	6.58067
						2016	5	3	123	26.8	13	19.9	68	24.7047	27.274	14.6838	3.24674	5.19044
						2016	5	4	124	23.1	14.4	18.75	63.5	52.2208	36.3457	24.6447	5.28298	6.61948
						2016	5	5	125	24.5	12.7	18.6	54.5	31.3862	29.6286	17.2504	3.68273	5.44314
						2016	5	6	126	24.9	6.1	15.5	66.5	19.3373	29.0833	13.4151	2.62004	4.91108
						2016	5	7	127	25.8	10.2	18	60	30.4112	37.9532	19.2183	4.03522	6.77093
						2016	5	8	128	21.2	5.5	13.35	54	31.8398	39.9908	20.1855	3.68779	6.1429
						2016	5	9	129	24.2	4.1	14.15	54.5	35.3952	56.9155	25.39	4.75774	8.87916
						2016	5	10	130	27	5	16	58.5	33.4333	58.8427	25.0906	4.97388	9.74923
						2016	5	11	131	28.3	6	17.15	58.5	30.5671	54.5318	23.0955	4.73415	9.36329
						2016	5	12	132	26.5	9.2	17.85	56	36.4566	50.4559	24.2616	5.07279	8.85123
						2016	5	13	133	27.9	11	19.45	62.5	35.501	47.9973	23.3509	5.1015	8.76637
						2016	5	14	134	30.6	11	20.8	57.5	36.4763	57.1948	25.838	5.84943	10.6779
						2016	5	15	135	31.7	14.6	23.15	53.5	38.4917	52.6566	25.4674	6.11656	10.2985
						2016	5	16	136	33.1	14.9	24	57	32.5534	47.3978	22.2204	5.44749	9.44074
						2016	5	17	137	32.1	17.6	24.85	52	42.5324	49.3375	25.9133	6.48202	9.94158
						2016	5	18	138	31.4	12.3	21.85	53	30.7533	46.991	21.5044	5.0008	9.02171
						2016	5	19	139	33.1	15	24.05	52.5	37.7854	54.7133	25.7207	6.31316	10.845
						2016	5	20	140	28.8	7.2	18	50.5	29.9999	51.8399	22.3083	4.68401	9.11905
						2016	5	21	141	29.3	6.2	17.75	49.5	33.0278	61.0353	25.3983	5.29557	10.6818
						2016	5	22	142	30.7	7.1	18.9	45.5	31.6095	59.6787	24.5693	5.28843	11.3619
						2016	5	23	143	32.4	8.9	20.65	52.5	31.0936	58.456	24.1171	5.43863	10.872
						2016	5	24	144	33.5	11	22.25	54.5	32.9025	59.2246	24.9713	5.86558	11.3535
						2016	5	25	145	27.8	10.1	18.95	51	35.3798	50.0979	23.8157	5.1332	9.03027
						2016	5	26	146	29.1	8.1	18.6	61.5	20.2494	34.019	14.8471	3.16965	6.19656
						2016	5	27	147	27	10.1	18.55	56.5	36.3221	49.1075	23.891	5.09339	8.7753
						2016	5	28	148	25.5	15	20.25	60.5	45.9839	38.6265	23.8408	5.32039	7.251
						2016	5	29	149	29.4	11.6	20.5	60	38.0529	54.1873	25.6872	5.77011	10.0744
						2016	5	30	150	25.4	12.2	18.8	52	42.6977	45.0887	24.8205	5.32795	8.13484
						2016	5	31	151	28.7	10.3	19.5	49.5	36.375	53.5439	24.965	5.46145	9.81766
						2016	6	1	152	30.4	9	19.7	48.5	28.3466	48.5293	20.9811	4.61452	9.09961
						2016	6	2	153	31.6	10	20.8	48.5	28.733	49.6507	21.3663	4.83709	9.5188
						2016	6	3	154	32.2	10.6	21.4	29	32.1424	55.542	23.9015	5.49514	13.6547
						2016	6	4	155	34.2	11.1	22.65	28.5	30.9806	57.2521	23.824	5.652	14.4661
						2016	6	5	156	35.1	13.9	24.5	46.5	32.7539	55.5507	24.1297	5.98632	11.6372
						2016	6	6	157	34.1	13.9	24	33	33.5724	54.2529	24.1422	5.91864	13.3588
						2016	6	7	158	34.3	10.7	22.5	39	35.4879	67.0012	27.584	6.51973	14.8704
						2016	6	8	159	31.6	13.6	22.6	58	37.6558	54.2244	25.5616	6.05673	10.4931
						2016	6	9	160	30.2	10.3	20.25	55	36.9922	58.8916	26.4032	5.89223	10.8599
						2016	6	10	161	34	13.9	23.95	45	38.2786	61.552	27.4583	6.72355	12.9977
						2016	6	11	162	31.4	12.1	21.75	39	37.7832	58.3373	26.5581	6.16045	12.8287
						2016	6	12	163	32.3	10.9	21.6	34.5	36.1474	61.8843	26.7549	6.18256	14.2958
						2016	6	13	164	32.2	9.6	20.9	36.5	34.6297	62.6105	26.3404	5.97863	13.9287
						2016	6	14	165	34.3	10.9	22.6	38	32.8316	61.4608	25.4109	6.02101	13.8714
						2016	6	15	166	36.4	12.6	24.5	34.5	34.4802	65.6504	26.914	6.67709	15.9091
						2016	6	16	167	36.5	13.7	25.1	32.5	36.0558	65.7658	27.5463	6.93088	16.4584
						2016	6	17	168	32.9	18.5	25.7	28	45.4451	52.3528	27.5923	7.03956	14.0065
						2016	6	18	169	33	20.3	26.65	35.5	46.9152	47.6659	26.7507	6.9739	11.9137
						2016	6	19	170	31.5	17.3	24.4	30.5	44.3335	50.3628	26.7298	6.61571	12.8751
						2016	6	20	171	33.7	17.4	25.55	38	41.1783	53.6965	26.6	6.76299	12.7646
						2016	6	21	172	35.8	13	24.4	33.5	34.1157	62.2271	26.0641	6.45094	15.2581
						2016	6	22	173	36.5	16.5	26.5	35.5	34.6175	55.3881	24.7703	6.4358	13.7347
						2016	6	23	174	36	18.1	27.05	33	40.4515	57.9265	27.383	7.20296	14.8749
						2016	6	24	175	36.6	18.5	27.55	27	33.7135	48.8171	22.9489	6.10391	13.5752
						2016	6	25	176	38	18.1	28.05	27.5	34.4756	54.8852	24.607	6.61707	15.2073
						2016	6	26	177	36.7	19.6	28.15	35	36.8305	50.3842	24.3683	6.56719	12.8862
						2016	6	27	178	36.2	19.7	27.95	32	37.8517	49.9643	24.6007	6.60096	13.2014
						2016	6	28	179	37.4	21.3	29.35	38	38.3875	49.4432	24.6447	6.81511	12.3845
						2016	6	29	180	36.1	23.2	29.65	31	42.3826	43.7388	24.3558	6.77807	11.9949
						2016	6	30	181	36.6	20	28.3	26	36.5333	48.5162	23.8157	6.43919	13.7687
						2016	7	1	182	35.9	20.5	28.2	29.5	34.389	42.3673	21.5924	5.8254	11.6311
						2016	7	2	183	37.3	17.1	27.2	25.5	31.1619	50.3576	22.4088	5.91425	14.1474
						2016	7	3	184	36.8	18.1	27.45	28.5	25.8641	38.6926	17.8952	4.74924	10.6862
						2016	7	4	185	35.9	18.8	27.35	27.5	35.7104	48.8519	23.6272	6.25661	13.4767
						2016	7	5	186	36.8	19.7	28.25	23.5	38.3303	52.4359	25.3607	6.84949	15.2204
						2016	7	6	187	37.4	20.9	29.15	25.5	38.2093	50.4363	24.8331	6.83809	14.5138
						2016	7	7	188	38	25	31.5	22	37.7339	39.2432	21.7682	6.29416	12.152
						2016	7	8	189	37.1	21.1	29.1	24.5	39.0176	49.9425	24.9713	6.86881	14.521
						2016	7	9	190	36.2	24.1	30.15	26	46.5823	45.0917	25.9259	7.29106	13.1158
						2016	7	10	191	36.6	19	27.8	24	37.5012	52.8017	25.1722	6.73217	15.158
						2016	7	11	192	36.7	18.4	27.55	32.5	37.1991	54.4595	25.4611	6.7721	14.188
						2016	7	12	193	36.3	20.6	28.45	28	37.4271	47.0085	23.7277	6.43629	13.0982
						2016	7	13	194	36.4	17.7	27.05	26.5	34.6206	51.7924	23.9538	6.30094	14.3524
						2016	7	14	195	37.8	23.5	30.65	28	38.8635	44.4599	23.5142	6.68178	12.7338
						2016	7	15	196	37.4	20.5	28.95	23.5	32.7701	44.3052	21.5547	5.91005	13.0603
						2016	7	16	197	36.7	17.1	26.9	22.5	32.646	51.1889	23.1248	6.06253	14.7694
						2016	7	17	198	37.2	19.6	28.4	26.5	35.4802	49.9561	23.8157	6.45316	14.1024
						2016	7	18	199	38.1	20.5	29.3	22.5	34.8253	49.034	23.376	6.45743	14.6001
						2016	7	19	200	38.5	21.7	30.1	20.5	37.3494	50.1977	24.4939	6.88117	15.3772
						2016	7	20	201	37.8	27.8	32.8	29	47.7153	38.1722	24.1422	7.16467	11.1339
						2016	7	21	202	37.2	22.2	29.7	21.5	38.2905	45.9485	23.7277	6.61025	13.9232
						2016	7	22	203	37	18	27.5	25	32.9593	50.0982	22.9866	6.10719	14.207
						2016	7	23	204	36.4	20	28.2	23	35.7279	46.875	23.1499	6.24562	13.7305
						2016	7	24	205	38.3	17.9	28.1	25.5	31.9821	52.1948	23.1122	6.2219	14.8116
						2016	7	25	206	38.3	18.8	28.55	25	32.6052	50.864	23.0369	6.26241	14.6051
						2016	7	26	207	36.7	19.7	28.2	27	28.8274	39.2053	19.0174	5.13069	11.1023
						2016	7	27	208	37.7	20	28.85	30.5	26.7464	37.8729	18.0041	4.92596	10.4212
						2016	7	28	209	37.7	18.9	28.3	31	25.0589	37.6885	17.3844	4.70034	10.2471
						2016	7	29	210	38.2	19.3	28.75	30	23.2348	35.1311	16.1618	4.41243	9.74888
						2016	7	30	211	38.6	17.1	27.85	27	29.1553	50.1472	21.63	5.79117	13.983
						2016	7	31	212	38.4	18.4	28.4	27.5	31.8439	50.9503	22.7857	6.17407	14.218
						2016	8	1	213	37.5	18.3	27.9	26	22.3956	34.3997	15.7012	4.20841	9.87891
						2016	8	2	214	35.7	19.1	27.4	27	30.7623	40.8524	20.0536	5.31618	11.4292
						2016	8	3	215	39.4	17.1	28.25	26	25.8513	46.1187	19.5324	5.27536	13.1084
						2016	8	4	216	39.2	18.3	28.75	26.5	26.291	43.9585	19.2309	5.25034	12.53
						2016	8	5	217	36	18	27	25.5	30.2542	43.5661	20.5372	5.3962	12.2831
						2016	8	6	218	37.6	20.7	29.15	26.5	32.3691	43.763	21.2909	5.8627	12.5358
						2016	8	7	219	35.8	19.5	27.65	31.5	31.365	40.8999	20.2609	5.40083	10.9232
						2016	8	8	220	36.7	23.9	30.3	25.5	37.1498	38.0414	21.2658	5.99921	11.2337
						2016	8	9	221	35.7	22.3	29	28	34.2497	36.7157	20.0599	5.50609	10.4206
						2016	8	10	222	36	21.4	28.7	24	35.257	41.1802	21.5547	5.87845	12.0816
						2016	8	11	223	36.4	18.6	27.5	21	31.5029	44.8602	21.2658	5.64999	13.3193
						2016	8	12	224	36.3	20.7	28.5	22	34.1679	42.6415	21.5924	5.86339	12.7192
						2016	8	13	225	37.8	22	29.9	22.5	33.3485	42.1525	21.2092	5.93351	12.7214
						2016	8	14	226	37.6	20.8	29.2	22.5	31.6225	42.5007	20.7382	5.71659	12.7196
						2016	8	15	227	37.6	20.6	29.1	22.5	31.0361	42.2091	20.4744	5.63187	12.6217
						2016	8	16	228	38.2	18.7	28.45	23.5	27.7162	43.2372	19.5826	5.3119	12.6836
						2016	8	17	229	38.4	19.9	29.15	28.5	29.2767	43.3296	20.1478	5.54795	12.1517
						2016	8	18	230	36.4	22.3	29.35	25	31.3189	35.3277	18.8164	5.20338	10.4179
						2016	8	19	231	37.1	19.5	28.3	25.5	29.5107	41.5511	19.8087	5.35581	11.9368
						2016	8	20	232	38.3	17.3	27.8	24	28.0271	47.0855	20.5498	5.49592	13.5795
						2016	8	21	233	35.4	21.3	28.35	26.5	34.1832	38.5586	20.5372	5.55881	11.0074
						2016	8	22	234	37.4	21.3	29.35	27.5	32.4005	41.7318	20.801	5.7522	11.8798
						2016	8	23	235	37.7	23.2	30.45	27	33.7084	39.1017	20.5372	5.81176	11.3661
						2016	8	24	236	37.6	19.1	28.35	30.5	29.8243	44.14	20.5247	5.55541	11.9832
						2016	8	25	237	38.1	20.4	29.25	33	30.043	42.5409	20.2232	5.58056	11.3666
						2016	8	26	238	36.3	19.7	28	32.5	29.7122	39.4578	19.3691	5.20286	10.4836
						2016	8	27	239	36.4	23.2	29.8	24.5	31.9584	33.7481	18.5777	5.18642	10.0821
						2016	8	28	240	36.3	23.4	29.85	23.5	32	33.024	18.3893	5.13921	9.98743
						2016	8	29	241	38.5	21.6	30.05	23.5	28.4733	38.496	18.7285	5.25596	11.5696
						2016	8	30	242	36.8	16.9	26.85	21	20.0976	31.9953	14.3447	3.75647	9.58772
						2016	8	31	243	36.8	22	29.4	18.5	28.6919	33.9712	17.6608	4.88899	10.7333
						2016	9	1	244	37.8	21.5	29.65	19.5	22.9452	29.9206	14.822	4.12487	9.46077
						2016	9	2	245	37.4	19.6	28.5	20.5	26.9068	38.3153	18.1632	4.93221	11.6649
						2016	9	3	246	36.1	16.7	26.4	31	24.704	38.3405	17.4095	4.51313	10.1617
						2016	9	4	247	37.2	17.7	27.45	47	24.0005	37.4408	16.9573	4.50033	8.26394
						2016	9	5	248	35.7	18.8	27.25	49.5	21.8181	29.4981	14.3509	3.79178	6.36086
						2016	9	6	249	36.2	17.4	26.8	44	19.5003	29.3284	13.5282	3.53869	6.77985
						2016	9	7	250	35.6	18.6	27.1	43	22.1061	30.0643	14.5833	3.84035	7.05798
						2016	9	8	251	36.2	13.5	24.85	26.5	20.498	37.2244	15.6259	3.90869	10.1514
						2016	9	9	252	36.6	18.7	27.65	24	23.2503	33.2944	15.7389	4.19544	9.75267
						2016	9	10	253	36.7	14.1	25.4	30.5	17.5873	31.7979	13.3775	3.38942	8.44468
						2016	9	11	254	36.6	14.6	25.6	39.5	21.8928	38.5313	16.4298	4.18205	9.13118
						2016	9	12	255	36.5	15.6	26.05	42.5	22.6332	37.8428	16.5554	4.25772	8.6974
						2016	9	13	256	37.4	12.5	24.95	46.5	19.7918	39.4253	15.8017	3.96195	8.43942
						2016	9	14	257	37.3	15	26.15	34.5	21.0135	37.4881	15.8771	4.09259	9.52329
						2016	9	15	258	34.9	16	25.45	29	20.0626	30.3347	13.9553	3.53991	8.22148
						2016	9	16	259	33.1	17.7	25.4	28	21.9057	26.9879	13.7543	3.4849	7.44846
						2016	9	17	260	33	13.7	23.35	28.5	20.8543	32.1991	14.6587	3.5378	8.45984
						2016	9	18	261	31.2	13.9	22.55	26.5	21.6871	30.0149	14.4326	3.41551	7.98332
						2016	9	19	262	32.2	12.2	22.2	28	20.9601	33.5362	14.9978	3.51849	8.66225
						2016	9	20	263	33.3	10.8	22.05	29	14.8045	26.6481	11.2358	2.62604	6.8926
						2016	9	21	264	34.3	10.6	22.45	27.5	13.7475	26.0653	10.7083	2.52786	6.91401
						2016	9	22	265	30.8	16	23.4	23.5	20.5904	24.379	12.674	3.06253	6.89308
						2016	9	23	266	32.1	12.9	22.5	24.5	12.7924	19.6491	8.96855	2.1198	5.51646
						2016	9	24	267	31.9	15.8	23.85	22	23.0482	29.6861	14.7969	3.61454	8.46617
						2016	9	25	268	26.2	12.9	19.55	22.5	21.7205	23.1106	12.674	2.77635	6.15712
						2016	9	26	269	27.1	5.8	16.45	21.5	13.8465	23.5944	10.2247	2.05389	5.86022
						2016	9	27	270	29.1	5.4	17.25	21.5	19.2868	36.5679	15.023	3.08824	9.0198
						2016	9	28	271	32.5	10.9	21.7	26	19.5946	33.8594	14.5708	3.37557	8.84864
						2016	9	29	272	30.7	10.6	20.65	32.5	18.0712	29.0584	12.963	2.92327	6.99147
						2016	9	30	273	28.7	7.7	18.2	32	18.1765	30.5365	13.3272	2.81391	6.97028
						2016	10	1	274	28.3	6.8	17.55	37	6.48461	11.1535	4.81086	0.997425	2.62465
						2016	10	2	275	30.4	9.3	19.85	32.5	17.0652	28.806	12.5422	2.76952	6.81918
						2016	10	3	276	30.9	8.3	19.6	33	5.43308	9.823	4.13257	0.906483	2.60006
						2016	10	4	277	31.2	8.2	19.7	28.5	5.17282	9.51799	3.96928	0.872993	2.67041
						2016	10	5	278	32.1	8.6	20.35	30.5	8.95562	16.8366	6.94623	1.55422	4.3185
						2016	10	6	279	32.5	9.1	20.8	27.5	9.81865	18.3805	7.5994	1.72042	4.87208
						2016	10	7	280	32.6	8.7	20.65	28	7.19421	13.7553	5.62733	1.26901	3.7395
						2016	10	8	281	32.5	9.2	20.85	31	5.35084	9.97397	4.13257	0.93678	2.76542
						2016	10	9	282	32.6	8.6	20.6	34	14.8392	28.4912	11.6315	2.6196	6.7396
						2016	10	10	283	32	10.9	21.45	38.5	11.5705	19.531	8.5038	1.95758	4.59226
						2016	10	11	284	31.6	10.3	20.95	32.5	5.18817	8.84064	3.8311	0.87069	2.46833
						2016	10	12	285	31	10	20.5	30	13.3625	22.4491	9.79758	2.20083	5.64794
						2016	10	13	286	30.8	11.3	21.05	32.5	14.4714	22.5754	10.2247	2.32974	5.58094
						2016	10	14	287	31	11.2	21.1	35.5	15.9669	25.2915	11.3677	2.59352	5.98899
						2016	10	15	288	31.1	12.1	21.6	40.5	16.9119	25.7061	11.7948	2.72555	5.77547
						2016	10	16	289	27.8	13.3	20.55	44.5	18.0809	20.9738	11.016	2.47775	4.45774
						2016	10	17	290	26.7	5.4	16.05	63	13.115	22.348	9.68453	1.92267	3.91598
						2016	10	18	291	27.1	5.4	16.25	82.5	13.0947	22.7324	9.7599	1.94908	4.00137
						2016	10	19	292	27.6	6.8	17.2	75.5	11.8946	19.7926	8.67965	1.78172	3.62355
						2016	10	20	293	28.2	14.2	21.2	79.5	10.0712	11.2798	6.02928	1.37911	2.42724
						2016	10	21	294	26.6	7.1	16.85	84.5	13.4758	21.0223	9.52124	1.93493	3.79049
						2016	10	22	295	26.9	7.6	17.25	63.5	13.1166	20.252	9.21977	1.89529	3.70462
						2016	10	23	296	26.7	6.1	16.4	60	11.9695	19.7258	8.69221	1.74351	3.53221
						2016	10	24	297	26.9	6.5	16.7	67	11.9585	19.5163	8.64197	1.74864	3.52858
						2016	10	25	298	26.2	8.5	17.35	66	14.2191	20.1343	9.57148	1.97321	3.695
						2016	10	26	299	24.5	8.7	16.6	61.5	16.0768	20.3211	10.2247	2.06289	3.6496
						2016	10	27	300	24.6	9	16.8	60.5	14.659	18.2944	9.26374	1.87988	3.33843
						2016	10	28	301	26.3	4.9	15.6	60.5	11.0309	18.8849	8.16465	1.59938	3.31486
						2016	10	29	302	21.8	14.8	18.3	60	19.5246	10.9337	8.26514	1.74995	2.21873
						2016	10	30	303	19.7	13	16.35	64.5	22.2013	11.8999	9.19465	1.84159	2.26181
						2016	10	31	304	21.5	10.1	15.8	62.5	15.439	14.0804	8.3405	1.64361	2.57151
						2016	11	1	305	18.7	12.5	15.6	62.5	24.4664	12.1353	9.74734	1.90942	2.24816
						2016	11	2	306	17	8.8	12.9	68	17.546	11.5102	8.03904	1.44747	1.94936
						2016	11	3	307	14.8	4.6	9.7	68	15.6828	12.7972	8.01392	1.29254	1.81238
						2016	11	4	308	15.9	-0.6	7.65	70	13.5288	17.8581	8.7927	1.31244	2.0886
						2016	11	5	309	17.9	0.2	9.05	66	11.2708	15.9594	7.58684	1.19474	2.10552
						2016	11	6	310	18.4	0.2	9.3	70.5	11.6302	16.9335	7.93855	1.26177	2.25699
						2016	11	7	311	20.7	-0.3	10.2	67	10.4502	17.5563	7.66221	1.25829	2.46515
						2016	11	8	312	19.7	1.2	10.45	58	11.7545	17.3967	8.08928	1.34028	2.48043
						2016	11	9	313	21	3.7	12.35	57	8.04064	11.1282	5.35099	0.946214	1.85031
						2016	11	10	314	21	6.1	13.55	54	12.691	15.1277	7.83806	1.44117	2.5332
						2016	11	11	315	20.2	4.2	12.2	35	12.9143	16.5303	8.26514	1.45425	3.14383
						2016	11	12	316	21.5	1.7	11.6	43.5	12.9147	20.4568	9.19465	1.58544	3.33109
						2016	11	13	317	21	2.3	11.65	46	12.0546	18.0336	8.3405	1.44061	2.88291
						2016	11	14	318	18.6	2.2	10.4	46.5	15.0433	19.7369	9.74734	1.61214	2.90899
						2016	11	15	319	19.1	3.9	11.5	51	12.8873	15.671	8.03904	1.38146	2.38935
						2016	11	16	320	16.7	5	10.85	53	14.6431	13.7059	8.01392	1.3466	2.0553
						2016	11	17	321	19.6	5.6	12.6	53	14.6872	16.4496	8.7927	1.5677	2.62376
						2016	11	18	322	15.8	6.2	11	55	15.304	11.7535	7.58684	1.28151	1.81563
						2016	11	19	323	13.9	-0.3	6.8	68	13.1667	14.9574	7.93855	1.14537	1.64843
						2016	11	20	324	16.6	-2.6	7	87.5	10.9291	16.7871	7.66221	1.11448	1.86196
						2016	11	21	325	18.2	-2.2	8	76	11.1937	18.2682	8.08928	1.22405	2.19514
						2016	11	22	326	16.3	-3.2	6.55	67.5	7.5735	11.8147	5.35099	0.764189	1.31013
						2016	11	23	327	16.5	1.9	9.2	81	12.8207	14.9746	7.83806	1.2412	2.01108
						2016	11	24	328	15.8	-5.8	5	86	13.1081	22.6508	9.74734	1.30343	1.91741
						2016	11	25	329	15.5	-6.4	4.55	57.5	10.7365	18.8103	8.03904	1.05378	1.50792
						2016	11	26	330	15.3	-5.9	4.7	62.5	10.8782	18.4494	8.01392	1.05754	1.51908
						2016	11	27	331	13.6	-5.9	3.85	56.5	12.4447	19.4138	8.7927	1.11647	1.36152
						2016	11	28	332	13.3	-6.5	3.4	57	10.6564	16.8797	7.58684	0.943333	1.08663
						2016	11	29	333	13	-6.4	3.3	62.5	11.7281	18.2021	8.26514	1.02282	1.13436
						2016	11	30	334	11.6	-7.2	2.2	72	13.2537	19.9335	9.19465	1.07853	0.873259
						2016	12	1	335	8.4	2.8	5.6	69.5	22.0282	9.86862	8.3405	1.14466	1.00777
						2016	12	2	336	12.2	4.1	8.15	77	21.4054	13.8707	9.74734	1.48351	1.74189
						2016	12	3	337	12.8	6.3	9.55	82	19.7073	10.2478	8.03904	1.28952	1.48782
						2016	12	4	338	11.6	2.5	7.05	82	16.6037	12.0875	8.01392	1.16799	1.40521
						2016	12	5	339	12.2	5.7	8.95	92.5	21.5549	11.2085	8.7927	1.37948	1.54058
						2016	12	6	340	10.2	4.3	7.25	85.5	19.5216	9.21419	7.58684	1.11465	1.14185
						2016	12	7	341	9.1	-0.8	4.15	77.5	15.769	12.489	7.93855	1.02198	0.979422
						2016	12	8	342	7.8	-6	0.9	76.5	12.8912	14.2319	7.66221	0.840357	0.286404
						2016	12	9	343	8.4	-5.3	1.55	70.5	13.6593	14.9706	8.08928	0.918035	0.495326
						2016	12	10	344	7.9	-7.7	0.1	77.5	8.46743	10.5674	5.35099	0.561765	0.0259853
						2016	12	11	345	7.1	-5.3	0.9	69.5	13.9116	13.8003	7.83806	0.859644	0.27883
						2016	12	12	346	8.3	-4.6	1.85	75	16.9618	17.5045	9.74734	1.12335	0.666912
						2016	12	13	347	11.2	-3.9	3.65	84.5	12.9299	15.6193	8.03904	1.01135	1.07443
						2016	12	14	348	8.1	4.9	6.5	87.5	27.9995	7.16787	8.01392	1.14214	0.867656
						2016	12	15	349	8	2	5	88	22.435	10.7688	8.7927	1.17578	0.996558
						2016	12	16	350	2.1	-0.7	0.7	71.5	28.3375	6.34761	7.58684	0.823192	0.116622
						2016	12	17	351	0.9	-0.9	0	79	42.8331	6.16796	9.19465	0.959894	0
						2016	12	18	352	1.6	-1.5	0.05	69.5	29.6068	7.34249	8.3405	0.873169	0.00971452
						2016	12	19	353	1.4	-6.8	-2.7	75	21.2745	13.9561	9.74734	0.863239	-1.09191
						2016	12	20	354	2.5	-3.3	-0.4	73.5	20.8627	9.68029	8.03904	0.820392	-0.0999668
						2016	12	21	355	2.6	-8.3	-2.85	76.5	15.1709	13.229	8.01392	0.702674	-1.11394
						2016	12	22	356	0.1	-5.8	-2.85	69	22.6244	10.6787	8.7927	0.770959	-0.928489
						2016	12	23	357	6.1	-2.6	1.75	74	16.0761	11.189	7.58684	0.869913	0.430081
						2016	12	24	358	8.5	-5.4	1.55	83.5	13.308	14.7985	7.93855	0.900928	0.490329
						2016	12	25	359	6.2	2.3	4.25	87	24.2494	7.56583	7.66221	0.990902	0.66086
						2016	12	26	360	9	4.9	6.95	88	24.9688	8.18978	8.08928	1.17423	1.00901
						2016	12	27	361	8.8	4.5	6.65	74.5	16.128	5.54802	5.35099	0.767327	0.727288
						2016	12	28	362	11.6	2.2	6.9	76.5	15.9781	12.0155	7.83806	1.13547	1.3777
						2016	12	29	363	10.6	-0.4	5.1	71.5	15.1018	13.2896	8.01392	1.07634	1.20971
						2016	12	30	364	11.4	1.6	6.5	73.5	17.5545	13.7628	8.7927	1.25313	1.48573
						2016	12	31	365	12.6	-1.2	5.7	72.5	12.7644	14.0919	7.58684	1.04568	1.38133
										11.7	-3.2
																	1113.63	2182.61
																	ETo-HS	ETo-TURC (Ousman Couly (2016)

## Sheet: 2017
	BATMAN PROVINCE					year	month	day	DOY	Tmax	Tmin	Tmean	RHmean.	Ra	Rs=0.16(Tmax-Tmin)^0.5*Ra	Rs=from meteorological station	ETo-HS	ETo-TURC (Ousman Couly (2016)
	DOY	246					#	#		°C	°C	°C	%	MJ m-2 day-1*(0.408 mm day-1)
	φ (-)	36.71	0.64071			2017	1	1	1	10.4	-1.3	4.55	69.5	12.2561	11.4717	6.70757	0.879247	0.978455
	tan(φ)		0.745649			2017	1	2	2	8.5	-5.6	1.45	70	10.2027	11.5086	6.12977	0.692058	0.371586
	sin(φ)		0.597765			2017	1	3	3	5.1	-3.3	0.9	71.5	11.0245	7.40847	5.11233	0.560697	0.166671
	cos(φ)		0.801671			2017	1	4	4	6.2	0	3.1	79	6.62106	3.28405	2.63781	0.323339	0.285329
	dr	0.984766		(1+0.033*cos(2*3.14/365*DOY))		2017	1	5	5	4.4	-5.4	-0.5	81.5	16.8774	13.2319	8.45355	0.857736	-0.163786
	δ	0.120494		(0.409*sin(2*3.14/365*DOY-1.39))		2017	1	6	6	11.1	0.6	5.85	72	17.0077	14.2865	8.81782	1.2231	1.4244
	tan(δ)	0.121081				2017	1	7	7	7.7	-4.4	1.65	81	14.715	14.2441	8.18977	0.934242	0.501795
	sin(δ)	0.120203				2017	1	8	8	13.5	3	8.25	62	10.5148	8.8324	5.45147	0.832894	1.20146
	cos(δ)	0.992749				2017	1	9	9	11.6	3.9	7.75	59.5	17.8803	11.0143	7.93855	1.1896	1.38387
	X	0.991849				2017	1	10	10	9	-0.4	4.3	75.5	13.9808	10.5136	6.85831	0.88895	0.870496		-
	ωs (eq. 25)	1.49314		(acos{(-1*tan(-0.35)*tan(0.409*sin(2*3.14/365*DOY-1.39))))		2017	1	11	11	9.7	-5	2.35	70.5	15.357	18.0599	9.42075	1.11334	0.846061
	sin ωs	0.996986				2017	1	12	12	9.2	-6.1	1.55	67	14.3571	17.5731	8.9853	1.01972	0.570883
	sin φ*sin δ	-0.0718532		(sin(0.35)*sin(0.409*sin(2*3.14/365*DOY-1.39)))		2017	1	13	13	8.2	-3	2.6	67	17.3825	15.5748	9.3077	1.11363	0.808966
	cos φ*cos δ	0.795859		(cos(0.35)*cos(0.409*sin(2*3.14/365*DOY-1.39))		2017	1	14	14	7.6	-6.6	0.5	65	16.5556	18.8072	9.98181	1.07134	0.208972
	Gsc	0.082				2017	1	15	15	3.5	-1.6	0.95	72.5	26.3852	10.7652	9.5338	1.04842	0.237357
						2017	1	16	16	6.9	-2.2	2.35	78	7.25218	5.27959	3.50033	0.413668	0.309438
	Ra	25.4105				2017	1	17	17	10	-4.1	2.95	71	14.5305	16.3904	8.72989	1.06242	0.94152
						2017	1	18	18	10.6	-3.1	3.75	65.5	18.0711	19.8059	10.702	1.35263	1.35754
						2017	1	19	19	12.6	-3.7	4.45	64	14.3375	18.6961	9.26164	1.20861	1.47427
						2017	1	20	20	11.3	-5.4	2.95	62	14.9204	19.9337	9.75571	1.18726	1.12204
						2017	1	21	21	10	-5.9	2.05	63.5	15.7112	19.9846	10.0237	1.16696	0.822781
						2017	1	22	22	10.7	-6.6	2.05	56.5	14.0051	19.383	9.32026	1.08507	0.800358
						2017	1	23	23	10.5	-8.6	0.95	50.5	10.5804	16.1669	7.39843	0.813596	0.337094
						2017	1	24	24	10	-9.5	0.25	53.5	13.8136	21.5493	9.7599	1.03321	0.120134
						2017	1	25	25	5.3	-2.3	1.5	71.5	22.1268	13.4531	9.7599	1.10477	0.438033
						2017	1	26	26	6.3	1.5	3.9	87	24.4023	9.37048	8.55404	1.08868	0.733107
						2017	1	27	27	8.5	3.2	5.85	81.5	27.6218	11.7116	10.1744	1.41126	1.20044
						2017	1	28	28	3.7	-1.4	1.15	91.5	13.4881	5.50315	4.87367	0.541668	0.167613
						2017	1	29	29	4.4	-11.4	-3.5	73	1.88616	2.38411	1.19958	0.100608	-0.422122
						2017	1	30	30	-4.7	-17.3	-11	83.5	18.3273	18.4739	10.4089	0.415127	-17.5308
						2017	1	31	31	0.7	-6.4	-2.85	85.5	25.3086	14.3753	10.7899	0.946077	-1.19729
						2017	2	1	32	0.2	-9.7	-4.75	69.5	22.5556	17.8641	11.3551	0.869103	-2.86657
						2017	2	2	33	-1.4	-18.2	-9.8	70.5	16.9796	22.8206	11.1353	0.52247	-14.5536
						2017	2	3	34	0.7	-16.8	-8.05	66	17.8908	25.0471	11.9748	0.684765	-9.74399
						2017	2	4	35	-1.1	-17	-9.05	74	19.383	24.6552	12.3663	0.634623	-12.6107
						2017	2	5	36	1.1	-11	-4.95	70.5	22.3282	21.6137	12.427	0.936565	-3.61924
						2017	2	6	37	2.3	-11.6	-4.65	74	21.6045	24.0242	12.8876	0.993952	-3.63707
						2017	2	7	38	3.7	-9.9	-3.1	76	20.6494	22.4665	12.1842	1.05046	-1.98309
						2017	2	8	39	1.2	-8.7	-3.75	84	17.6278	13.9612	8.87435	0.731275	-1.65863
						2017	2	9	40	2.6	-3	-0.2	93	23.8196	10.6712	9.0188	0.930956	-0.053459
						2017	2	10	41	2.9	-2	0.45	89.5	30.0393	11.7754	10.6392	1.13878	0.125192
						2017	2	11	42	5.4	-0.3	2.55	82.5	16.7811	7.65219	6.4103	0.765087	0.438815
						2017	2	12	43	4.8	-3.4	0.7	86	19.1087	12.5353	8.75502	0.949941	0.202146
						2017	2	13	44	6.6	1.4	4	74.5	22.8597	9.50964	8.3405	1.06639	0.757029
						2017	2	14	45	8.5	-1.3	3.6	66	12.3885	9.71257	6.20513	0.778813	0.708154
						2017	2	15	46	6.6	-0.1	3.25	76	32.8773	17.6222	13.6161	1.68102	1.08822
						2017	2	16	47	5.2	-4.9	0.15	66	7.06496	5.70849	3.59245	0.378201	0.0239359
						2017	2	17	48	4.2	-6.8	-1.3	48	5.39688	4.74925	2.86391	0.277148	-0.206932
						2017	2	18	49	8.1	-9.7	-0.8	46	7.72222	10.9964	5.21281	0.519744	-0.241612
						2017	2	19	50	9.3	-8.1	0.6	52	18.444	25.6741	12.3098	1.32842	0.331033
						2017	2	20	51	14	-7.8	3.1	56.5	19.5381	34.0744	14.5959	1.78914	1.92011
						2017	2	21	52	14.1	-7	3.55	56	17.7745	30.0033	13.0634	1.63577	1.90397
						2017	2	22	53	16.1	-5.3	5.4	54.5	18.2434	31.2327	13.5031	1.83734	2.73442
						2017	2	23	54	15.7	3.7	9.7	48.5	26.4022	25.3461	14.6336	2.36021	3.41167
						2017	2	24	55	17.6	-4.5	6.55	57	7.89895	13.9653	5.94135	0.848501	1.51278
						2017	2	25	56	18.8	-2.3	8.25	53.5	11.2856	19.0502	8.29445	1.26725	2.32542
						2017	2	26	57	17.2	-2.6	7.3	58	12.8529	20.359	9.15069	1.34709	2.27812
						2017	2	27	58	19	-0.6	9.2	56	20.9838	32.9025	14.8638	2.35376	4.12391
						2017	2	28	59	20.1	-0.8	9.65	55.5	17.2182	28.7888	12.5945	2.02764	3.74742
						2017	3	1	60	19.5	2.7	11.1	55	19.5622	26.2916	12.829	2.17449	3.7418
						2017	3	2	61	14.2	7.6	10.9	68.5	31.1697	16.4576	12.8122	2.15662	2.41978
						2017	3	3	62	10.7	6.8	8.75	89	43.2117	13.4821	13.6538	2.12611	1.77849
						2017	3	4	63	11.9	6.5	9.2	83.5	36.0134	15.5578	13.39	2.12038	2.07982
						2017	3	5	64	17.4	3.9	10.65	70.5	26.4306	28.545	15.538	2.59265	3.94314
						2017	3	6	65	18.9	0.5	9.7	61	20.8275	30.6581	14.2944	2.30551	3.98678
						2017	3	7	66	18.5	0.7	9.6	57	21.8083	31.055	14.7215	2.36576	4.00974
						2017	3	8	67	19.5	3.8	11.65	50.5	22.8545	28.7053	14.4891	2.50262	4.17325
						2017	3	9	68	19.6	1.4	10.5	55.5	21.0337	30.625	14.3572	2.383	4.17597
						2017	3	10	69	21.6	5.8	13.7	48.5	11.9687	15.1285	7.61197	1.40629	2.60258
						2017	3	11	70	18	10.9	14.45	55.5	15.6742	8.90297	6.68245	1.26396	1.67209
						2017	3	12	71	17.9	5.9	11.9	63.5	28.0112	26.8908	15.5254	2.70438	3.97435
						2017	3	13	72	14.8	8.1	11.45	71	33.4839	17.9474	13.8673	2.37896	2.68895
						2017	3	14	73	16.1	4.1	10.1	68.5	18.4702	17.7314	10.2372	1.67515	2.47254
						2017	3	15	74	13.3	5.8	9.55	74	11.0079	6.60475	4.82342	0.773715	1.0485
						2017	3	16	75	10.1	5.7	7.9	80	52.1724	18.3647	17.51	2.6393	2.18749
						2017	3	17	76	11.8	2.9	7.35	71.5	34.9468	24.8821	16.681	2.46053	2.74971
						2017	3	18	77	10.1	4.9	7.5	85	40.3832	16.7994	14.7341	2.18631	1.95191
						2017	3	19	78	14.8	-0.2	7.3	81	22.7027	27.2432	14.0683	2.07102	2.97673
						2017	3	20	79	16.2	4.4	10.3	72	28.5676	26.9678	15.7012	2.58767	3.66725
						2017	3	21	80	10.9	-0.1	5.4	73	27.9786	24.6211	14.8471	2.02022	2.19188
						2017	3	22	81	8.8	1.3	5.05	85	25.1835	15.1101	11.0348	1.47884	1.34298
						2017	3	23	82	15	-0.5	7.25	69	18.5846	23.045	11.7069	1.71995	2.53891
						2017	3	24	83	18.1	-0.3	8.9	60	20.0131	29.4593	13.7355	2.15091	3.64203
						2017	3	25	84	18.7	-1.1	8.8	57.5	23.2534	36.8334	16.5554	2.58279	4.46148
						2017	3	26	85	22.4	1	11.7	56.5	21.8581	37.4211	16.1786	2.79918	5.3673
						2017	3	27	86	20.9	8.5	14.7	42.5	32.8841	32.621	18.5275	3.53157	5.89648
						2017	3	28	87	22.6	10.1	16.35	47	28.7776	28.7776	16.2791	3.26053	5.20438
						2017	3	29	88	21	5.5	13.25	62	21.5458	26.7168	13.5722	2.4716	4.18846
						2017	3	30	89	22.2	3.3	12.75	58.5	15.9634	24.1367	11.1039	1.98955	3.73553
						2017	3	31	90	19.1	9.6	14.35	73	16.5051	12.5439	8.13953	1.53479	2.21801
						2017	4	1	91	15.2	8.9	12.05	80	25.9917	13.0998	10.4382	1.82742	2.09766
						2017	4	2	92	16.7	6.5	11.6	76	31.1199	25.3938	15.9022	2.74204	3.71548
						2017	4	3	93	12.6	7.7	10.15	77.5	44.19	17.3225	15.651	2.56562	2.42868
						2017	4	4	94	19.1	1.4	10.25	66	27.244	38.5775	18.3391	3.01702	5.11766
						2017	4	5	95	22.3	1.7	12	58.5	22.3996	36.9146	16.2665	2.84301	5.37396
						2017	4	6	96	23	2.1	12.55	55.5	19.4907	32.5884	14.2567	2.53774	4.89715
						2017	4	7	97	18.6	9.8	14.2	67	17.9164	12.6132	8.5038	1.59599	2.21655
						2017	4	8	98	19.4	3.6	11.5	65.5	23.8782	30.1821	15.1862	2.60967	4.34151
						2017	4	9	99	12.8	7.2	10	81	43.0611	19.2914	16.3042	2.65835	2.65129
						2017	4	10	100	16.3	1.3	8.8	69.5	27.3243	32.7891	16.9322	2.64158	3.99791
						2017	4	11	101	18.9	1.8	10.35	65	19.3455	26.4647	12.7997	2.11322	3.61411
						2017	4	12	102	20.5	0.9	10.7	60	25.3756	39.7889	17.9748	3.00453	5.40515
						2017	4	13	103	18.4	10	14.2	80	34.9696	23.4996	16.2163	3.04347	3.85772
						2017	4	14	104	21.5	14	17.75	72.5	41.595	24.957	18.226	3.80014	4.54431
						2017	4	15	105	23	9.4	16.2	68	27.4402	29.855	16.1911	3.22867	5.14191
						2017	4	16	106	21.3	5.3	13.3	68.5	27.5557	35.2713	17.6356	3.21677	5.44313
						2017	4	17	107	23.3	6.9	15.1	64.5	23.7088	31.1059	15.3621	2.96425	5.16246
						2017	4	18	108	17.1	8	12.55	68.5	42.1598	30.6923	20.3488	3.62215	4.62939
						2017	4	19	109	20	7.8	13.9	69	30.5677	29.8341	17.083	3.17607	4.7599
						2017	4	20	110	22.5	7.1	14.8	66.5	32.0284	39.459	20.1102	3.84504	6.39687
						2017	4	21	111	23.6	6.4	15	66	29.4165	40.4771	19.5198	3.75506	6.5979
						2017	4	22	112	28.2	7.4	17.8	60	24.9081	41.4471	18.1758	3.79499	7.32432
						2017	4	23	113	26.9	14.5	20.7	54	30.4094	30.1661	17.1332	3.86872	5.79797
						2017	4	24	114	20	7.4	13.7	50.5	28.7074	28.937	16.3042	3.01216	4.59135
						2017	4	25	115	21.3	1.5	11.4	55.5	23.5886	37.3644	16.7941	2.87612	5.28151
						2017	4	26	116	24.1	0.8	12.45	58	18.7036	34.8634	14.4451	2.5628	5.19569
						2017	4	27	117	25.6	4.7	15.15	55.5	23.2171	38.819	16.9825	3.28189	6.37244
						2017	4	28	118	26.6	6.1	16.35	56	26.8063	43.9623	19.4193	3.88949	7.44549
						2017	4	29	119	27.5	7.3	17.4	56	27.223	43.9923	19.5763	4.04149	7.67185
						2017	4	30	120	27.9	5.6	16.75	54.5	25.8679	46.1484	19.5449	3.9605	7.88906
						2017	5	1	121	26.2	5.7	15.95	62	23.1477	37.9623	16.7689	3.31931	6.39866
						2017	5	2	122	22.1	12.8	17.45	63.5	38.8208	28.8826	18.942	3.91609	5.16322
						2017	5	3	123	18.9	9.2	14.05	82.5	39.5243	30.6709	19.6956	3.67915	4.91188
						2017	5	4	124	21.7	11.5	16.6	72.5	42.3904	34.5906	21.6614	4.37033	5.97336
						2017	5	5	125	23.5	9.4	16.45	71	32.1134	36.2239	19.2937	3.87565	6.21245
						2017	5	6	126	25.4	8	16.7	67.5	32.1077	44.6939	21.4291	4.33601	7.64038
						2017	5	7	127	20.5	11.1	15.8	78	40.3165	30.318	19.7773	3.89739	5.15372
						2017	5	8	128	24.8	8.5	16.65	70.5	25.2657	32.9464	16.3209	3.29763	5.71376
						2017	5	9	129	28.5	10.8	19.65	66.5	18.399	26.053	12.3851	2.72033	4.94756
						2017	5	10	130	28.1	11.1	19.6	63	23.5722	32.0582	15.5505	3.41102	5.99666
						2017	5	11	131	31.7	11.3	21.5	56.5	26.7329	43.628	19.3188	4.45288	8.34824
						2017	5	12	132	28.3	7.9	18.1	57	22.0804	36.0352	15.9567	3.35973	6.46286
						2017	5	13	133	30.4	8.7	19.55	54	26.6613	46.284	19.8715	4.35301	8.4854
						2017	5	14	134	32.2	8.6	20.4	59.5	23.7556	44.8505	18.4647	4.13688	8.38565
						2017	5	15	135	28	15.4	21.7	55.5	33.9269	34.1983	19.2686	4.4639	6.65154
						2017	5	16	136	27.9	8.4	18.15	60	18.3115	28.566	12.9378	2.7279	5.20319
						2017	5	17	137	28.9	6.5	17.7	57.5	26.0755	46.7273	19.7459	4.11124	8.19145
						2017	5	18	138	31	8.3	19.65	56	29.1652	52.964	22.233	4.88334	9.67853
						2017	5	19	139	33.3	16.8	25.05	44.5	23.6948	31.2771	15.3998	3.8702	6.97806
						2017	5	20	140	26.9	14.7	20.8	57.5	39.12	38.1811	21.8624	4.94941	7.25329
						2017	5	21	141	22.3	11.9	17.1	67	33.4483	27.829	17.2588	3.53268	4.94083
						2017	5	22	142	26.7	10.1	18.4	59	32.2235	42.7928	21.0062	4.45988	7.66502
						2017	5	23	143	19.3	12.8	16.05	74.5	46.9281	24.4026	19.143	3.80046	4.24521
						2017	5	24	144	25.1	10.3	17.7	64.5	33.2834	39.4075	20.487	4.26555	6.96321
						2017	5	25	145	26.4	5.9	16.15	58	28.4362	46.6353	20.6	4.10181	7.83125
						2017	5	26	146	27.8	8.8	18.3	59.5	31.1583	47.3606	21.7305	4.60093	8.42442
						2017	5	27	147	30.8	13.1	21.95	49	28.6248	40.5328	19.2686	4.49215	7.96129
						2017	5	28	148	31.3	8.6	19.95	54	28.594	51.9266	21.7975	4.82605	9.55839
						2017	5	29	149	35.5	11.6	23.55	49	28.3593	54.223	22.1827	5.3797	10.8168
						2017	5	30	150	33.1	8.5	20.8	46	27.3356	53.7965	21.6928	4.91102	10.641
						2017	5	31	151	30	9.1	19.55	51	28.9527	48.4089	21.1778	4.63917	8.85813
						2017	6	1	152	28.8	9.6	19.2	53.5	30.7447	47.2239	21.5547	4.67747	8.58235
						2017	6	2	153	29.3	7.7	18.5	56	29.2229	50.4972	21.7305	4.62642	9.00261
						2017	6	3	154	31.4	10.5	20.95	48	29.1072	48.6673	21.2909	4.83876	9.43147
						2017	6	4	155	33.3	10.7	22	48.5	24.3745	44.0692	18.54	4.32774	8.69058
						2017	6	5	156	35.6	11.5	23.55	46	27.7617	53.5245	21.8059	5.28832	11.134
						2017	6	6	157	38.6	14.5	26.55	39.5	26.2265	50.5646	20.6	5.35833	11.9947
						2017	6	7	158	34.4	12.7	23.55	41.5	28.3466	49.2096	21.1276	5.12382	10.8947
						2017	6	8	159	35.9	13.6	24.75	45	28.5279	50.8937	21.5547	5.37909	10.9573
						2017	6	9	160	37.7	13.1	25.4	45	27.6205	54.3572	21.9189	5.55356	11.7874
						2017	6	10	161	37.5	15.5	26.5	37	27.8262	48.9742	20.8827	5.42572	11.9855
						2017	6	11	162	33.7	14.6	24.15	42.5	29.1545	44.5481	20.3865	5.01583	9.87397
						2017	6	12	163	35.2	12.5	23.85	44.5	24.5844	44.6453	18.741	4.578	9.59297
						2017	6	13	164	35.7	12.7	24.2	41.5	28.4833	52.4092	21.8561	5.38382	11.6964
						2017	6	14	165	34.8	15.7	25.25	39.5	30.6455	46.8263	21.4291	5.41059	10.9398
						2017	6	15	166	31.9	11.9	21.9	47	25.6296	41.0074	18.3391	4.27008	8.26904
						2017	6	16	167	33.6	13.4	23.5	46	30.1488	48.7204	21.6803	5.2515	10.1638
						2017	6	17	168	34	12.7	23.35	44.5	29.9043	50.9569	22.0822	5.32943	10.7992
						2017	6	18	169	35.7	13.3	24.5	36	27.4025	49.1053	20.7508	5.14805	11.8125
						2017	6	19	170	35.6	17	26.3	39	33.0297	49.1482	22.7919	5.89505	11.7044
						2017	6	20	171	33.6	17.3	25.45	38.5	32.4344	42.2945	20.9517	5.31465	10.0791
						2017	6	21	172	32.4	13.8	23.1	41.5	32.5109	48.3762	22.4339	5.38142	10.6371
						2017	6	22	173	32	13.3	22.65	43.5	29.8459	44.6495	20.6503	4.89906	9.52604
						2017	6	23	174	33.8	15.4	24.6	41	31.6988	46.6607	21.7557	5.41011	10.5953
						2017	6	24	175	36.4	13.8	25.1	38	28.6682	51.832	21.8059	5.48655	12.2567
						2017	6	25	176	38	14.7	26.35	35	27.3885	51.0522	21.1527	5.47728	12.7476
						2017	6	26	177	39.8	15.2	27.5	34	26.2118	51.5848	20.801	5.52651	13.2275
						2017	6	27	178	40.9	17.4	29.15	32	26.3648	49.5658	20.4493	5.63096	13.2915
						2017	6	28	179	40.9	16.2	28.55	29	24.6107	48.6307	19.57	5.31997	13.4001
						2017	6	29	180	40.9	18.2	29.55	27	24.5515	44.5855	18.7159	5.19755	12.751
						2017	6	30	181	40.3	18.6	29.45	29.5	27.5376	47.8053	20.5247	5.68782	13.2491
						2017	7	1	182	39.4	26.3	32.85	23	36.9605	38.7346	21.4039	6.3583	12.0396
						2017	7	2	183	40.9	19.7	30.3	33.5	27.2807	46.2681	20.0976	5.66966	12.3906
						2017	7	3	184	42.6	18.7	30.65	32	27.1068	51.8281	21.203	6.02502	14.1082
						2017	7	4	185	43.2	19.7	31.45	33.5	26.5591	49.9312	20.6	5.95035	13.4926
						2017	7	5	186	43.1	18.2	30.65	24.5	26.8086	53.4027	21.4039	6.08213	15.7577
						2017	7	6	187	41.8	19.4	30.6	23.5	27.303	48.9269	20.6754	5.86904	14.6306
						2017	7	7	188	39.5	20.2	29.85	33.5	27.0552	41.7733	19.0174	5.31473	11.1831
						2017	7	8	189	37.9	17.1	27.5	35.5	28.1959	46.918	20.5749	5.46644	11.8667
						2017	7	9	190	38.4	16.3	27.35	30.5	27.9887	49.484	21.0522	5.57473	13.2014
						2017	7	10	191	39.3	15.6	27.45	29.5	27.4305	52.0083	21.3663	5.67042	14.0204
						2017	7	11	192	40.9	16.2	28.55	26	25.7085	50.8	20.443	5.55729	14.4339
						2017	7	12	193	40.7	18	29.35	27.5	26.5123	48.1463	20.2106	5.58895	13.6188
						2017	7	13	194	41.2	19.1	30.15	32	27.638	48.8639	20.7885	5.84627	13.2603
						2017	7	14	195	40	21.3	30.65	34	28.2483	42.2595	19.5449	5.55387	11.3407
						2017	7	15	196	41.5	18.5	30	31	24.8983	45.8129	19.1053	5.35611	12.587
						2017	7	16	197	41.6	19.8	30.7	27	26.2301	45.7454	19.5952	5.57389	13.2348
						2017	7	17	198	42.3	19.3	30.8	26.5	24.9147	45.843	19.1178	5.44933	13.3473
						2017	7	18	199	42.7	19.1	30.9	26	25.1777	47.5355	19.57	5.5897	13.9073
						2017	7	19	200	42.2	18.8	30.5	27	25.6827	48.0779	19.8778	5.63097	13.8504
						2017	7	20	201	40.6	17.9	29.25	29.5	23.1893	42.1118	17.6775	4.87808	11.7102
						2017	7	21	202	42.5	17.9	30.2	29.5	24.6342	48.4802	19.5491	5.50346	13.5418
						2017	7	22	203	42.8	19.2	31	26	25.5978	48.3287	19.8966	5.69465	14.1445
						2017	7	23	204	41.2	20.3	30.75	32	25.4323	42.5229	18.6028	5.29708	11.6859
						2017	7	24	205	39.1	18.5	28.8	27	26.9833	44.4685	19.5952	5.35553	12.6085
						2017	7	25	206	39.1	18.7	28.9	29	25.7595	42.0395	18.6154	5.09867	11.7076
						2017	7	26	207	39.9	18	28.95	28.5	25.1217	44.0132	18.8101	5.15752	12.3057
						2017	7	27	208	41.5	17.2	29.35	27	24.6213	47.8638	19.4193	5.37011	13.6154
						2017	7	28	209	41.6	19.1	30.35	26	25.0741	45.1334	19.0299	5.37404	13.1562
						2017	7	29	210	39.6	19.9	29.75	28.5	27.239	42.9287	19.3439	5.39465	12.1275
						2017	7	30	211	41.2	17.6	29.4	33	23.093	43.5996	17.9497	4.96897	11.6564
						2017	7	31	212	42.3	18.2	30.25	28.5	23.6678	45.6315	18.5903	5.23899	12.9272
						2017	8	1	213	42.9	19.2	31.05	30	23.2539	44.0893	18.113	5.18946	12.4104
						2017	8	2	214	43.2	20.6	31.9	27	25.8443	46.7264	19.658	5.73011	13.6751
						2017	8	3	215	43.4	20.4	31.9	29.5	23.6215	43.4635	18.1255	5.28342	12.418
						2017	8	4	216	40.9	17.6	29.25	29.5	24.77	46.1713	19.1304	5.279	12.7857
						2017	8	5	217	39.5	15.8	27.65	26.5	22.7298	43.0957	17.7047	4.71945	12.1298
						2017	8	6	218	40.3	17.1	28.7	25.5	23.2342	43.1226	17.9057	4.88329	12.4267
						2017	8	7	219	40.5	17.5	29	25.5	23.8343	43.855	18.2888	5.01995	12.673
						2017	8	8	220	42.5	16.8	29.65	23	21.1925	43.5718	17.1897	4.7838	13.0254
						2017	8	9	221	44.7	18.5	31.6	21.5	20.634	43.2489	16.8987	4.89609	13.4113
						2017	8	10	222	43.9	19.8	31.85	28.5	22.2658	42.9285	17.4891	5.09278	12.4015
						2017	8	11	223	43.1	20.1	31.6	25	23.1713	42.6352	17.7801	5.15144	12.7597
						2017	8	12	224	43.1	19.8	31.45	28	22.428	41.8058	17.3216	5.00337	12.109
						2017	8	13	225	42.1	18.2	30.15	32	22.787	43.5688	17.8241	5.0126	11.8823
						2017	8	14	226	40.3	21.7	31	29.5	25.624	38.1286	17.6817	5.06072	10.8628
						2017	8	15	227	40.9	21.7	31.3	32	25.316	38.8854	17.7487	5.11112	10.7953
						2017	8	16	228	38.4	24.8	31.6	30	29.2816	31.8584	17.2777	5.00587	9.17544
						2017	8	17	229	40.8	26.7	33.75	32.5	29.939	33.7712	17.9874	5.43831	9.62046
						2017	8	18	230	40.4	21.5	30.95	29	23.0151	34.7989	16.009	4.57727	10.0133
						2017	8	19	231	39.6	17.7	28.65	29	21.2633	37.2533	15.9211	4.33736	10.4068
						2017	8	20	232	39.7	16.5	28.1	27.5	19.8576	36.8557	15.3035	4.11975	10.4014
						2017	8	21	233	39.8	17.3	28.55	30	21.4771	38.6588	16.3	4.43103	10.6473
						2017	8	22	234	39.4	19.6	29.5	32.5	25.9352	41.0813	18.4647	5.12237	11.0899
						2017	8	23	235	37.5	18.1	27.8	24.5	19.4459	30.18	13.7041	3.66507	8.86477
						2017	8	24	236	39.7	17.3	28.5	25	12.6811	22.7246	9.60288	2.60766	6.8399
						2017	8	25	237	40.6	17.6	29.1	27	9.88183	18.1826	7.58266	2.08575	5.50947
						2017	8	26	238	41	18	29.5	22	17.5565	32.3039	13.4717	3.73724	9.89541
						2017	8	27	239	41.3	17.7	29.5	37.5	15.2283	28.7511	11.8366	3.28366	7.46981
						2017	8	28	240	39.4	16.6	28	29.5	16.6057	30.2889	12.6866	3.40784	8.45013
						2017	8	29	241	39.8	17.1	28.45	25	15.2582	27.7088	11.6315	3.15511	8.20879
						2017	8	30	242	38.6	16.3	27.45	26.5	17.5999	31.3983	13.2979	3.52915	8.9667
						2017	8	31	243	38.1	15.8	26.95	26	17.8548	31.853	13.4905	3.5407	9.07756
						2017	9	1	244	39.5	17	28.25	24	18.4704	33.2468	14.0181	3.78605	9.81283
						2017	9	2	245	37.5	15.3	26.4	24	19.4057	34.4645	14.6294	3.79242	9.91014
						2017	9	3	246	39.2	15.5	27.35	20	18.272	34.6437	14.2325	3.76882	10.5059
						2017	9	4	247	40.5	15.1	27.8	22	18.4122	37.4135	14.8471	3.97077	11.1359
						2017	9	5	248	40.6	14.8	27.7	20.5	18.1993	37.5634	14.7906	3.94698	11.3349
						2017	9	6	249	39.3	17.2	28.25	34.5	18.1525	32.0937	13.6538	3.68766	8.45437
						2017	9	7	250	34.7	16.1	25.4	18.5	20.0872	29.8898	13.8611	3.51195	9.0377
						2017	9	8	251	36.1	11.5	23.8	19.5	17.9019	35.231	14.2065	3.46616	10.1889
						2017	9	9	252	38.7	11.8	25.25	19	15.6512	33.6815	12.9881	3.27934	10.0373
						2017	9	10	253	39	11.2	25.1	23.5	17.2123	38.2802	14.5205	3.65349	10.7989
						2017	9	11	254	38.7	11.8	25.25	25.5	15.7421	33.8769	13.0634	3.29837	9.44265
						2017	9	12	255	39.5	12.4	25.95	27.5	14.3869	31.1909	11.9832	3.07481	8.63939
						2017	9	13	256	38.7	13.2	25.95	28.5	16.7281	34.1253	13.5156	3.46803	9.29952
						2017	9	14	257	39.8	12.9	26.35	32.5	16.7713	36.0919	13.9176	3.60382	9.42833
						2017	9	15	258	40.5	13.6	27.05	22.5	14.849	31.955	12.3223	3.24133	9.45635
						2017	9	16	259	39.8	13.6	26.7	25	15.8538	33.2296	12.9839	3.3887	9.51434
						2017	9	17	260	40.1	15.6	27.85	25.5	15.6069	30.5895	12.36	3.30924	8.88884
						2017	9	18	261	40.3	16.6	28.45	35	17.0292	32.2873	13.2644	3.59806	8.4732
						2017	9	19	262	39	15	27	31	15.4641	29.6912	12.1214	3.18491	8.05263
						2017	9	20	263	39.8	17.2	28.5	28.5	16.58	29.9766	12.6112	3.42458	8.5132
						2017	9	21	264	38.5	21	29.75	39	17.7532	24.8545	11.8827	3.31386	6.42558
						2017	9	22	265	37.1	15.1	26.1	44.5	15.658	27.5581	11.7508	3.02552	6.29515
						2017	9	23	266	35.2	13.9	24.55	50.5	13.0583	22.2514	9.64266	2.39507	4.68394
						2017	9	24	267	33	12.4	22.7	37.5	17.15	28.2631	12.4542	2.95828	6.67738
						2017	9	25	268	34.9	11.7	23.3	34	8.27988	15.3675	6.38099	1.53815	4.04483
						2017	9	26	269	36.3	14.3	25.3	32	15.9649	28.0982	11.9811	3.0286	7.38582
						2017	9	27	270	33.6	15.9	24.75	25.5	12.3344	17.4656	8.30282	2.07202	5.0957
						2017	9	28	271	32.3	13	22.65	30	3.10939	4.80089	2.18561	0.518513	1.65229
						2017	9	29	272	32.7	13.1	22.9	44	14.7359	23.1059	10.4382	2.49165	5.12394
						2017	9	30	273	31.5	13.1	22.3	51.5	9.88301	14.5478	6.78294	1.59526	3.08357
						2017	10	1	274	31	13	22	31.5	15.4879	22.3026	10.5136	2.45415	5.68442
						2017	10	2	275	29.3	17.1	23.2	30.5	24.7464	24.1525	13.8297	3.32555	6.31707
						2017	10	3	276	27.8	9.9	18.85	33.5	18.6794	26.7489	12.6447	2.71802	6.15193
						2017	10	4	277	25.7	6.8	16.25	30.5	18.8076	28.437	13.0823	2.61257	6.2918
						2017	10	5	278	26.9	7	16.95	31	15.0996	24.0385	10.7773	2.19652	5.46346
						2017	10	6	279	27.2	5.8	16.5	29.5	14.2666	24.4245	10.5596	2.12427	5.56632
						2017	10	7	280	27.8	6.7	17.25	28	14.7323	24.8681	10.8276	2.22581	5.8749
						2017	10	8	281	29.1	6.3	17.7	28	13.1859	24.0512	10.0739	2.09747	5.76503
						2017	10	9	282	28.4	10	19.2	29	19.6562	28.9339	13.4905	2.92751	7.01903
						2017	10	10	283	28.1	13.2	20.65	28.5	16.6027	19.7904	10.254	2.31236	5.13571
						2017	10	11	284	27.3	10.2	18.75	29.5	14.6753	20.0757	9.70965	2.08142	4.9354
						2017	10	12	285	26.2	8	17.1	26.5	11.1885	16.2905	7.63709	1.56322	4.05437
						2017	10	13	286	26.6	7.3	16.95	30	16.6727	25.7427	11.7194	2.38852	5.88519
						2017	10	14	287	27.4	5.1	16.25	36	14.2861	25.4864	10.7941	2.15561	5.33438
						2017	10	15	288	27.1	6.9	17	62	9.72935	15.7226	6.99648	1.42799	2.93352
						2017	10	16	289	25.9	4.5	15.2	76	5.64555	9.66519	4.17863	0.808752	1.83412
						2017	10	17	290	23.7	3.8	13.75	62.5	7.4442	11.8512	5.3133	0.983178	2.06693
						2017	10	18	291	26.5	4.6	15.55	77.5	14.8465	26.0111	11.1165	2.17436	4.43409
						2017	10	19	292	26.2	4.9	15.55	92.5	16.5313	28.1693	12.2072	2.3877	4.77463
						2017	10	20	293	27	4.2	15.6	28	12.9119	23.5513	9.86457	1.93238	5.32593
						2017	10	21	294	26.3	4.3	15.3	38	12.2687	21.5928	9.20721	1.78741	4.3427
						2017	10	22	295	27.2	3.9	15.55	55.5	11.1083	20.7058	8.57916	1.67806	3.59697
						2017	10	23	296	26.9	4.5	15.7	55.5	11.5089	20.624	8.71524	1.71235	3.60095
						2017	10	24	297	27.6	8	17.8	51.5	10.1786	15.96	7.21001	1.50541	3.03659
						2017	10	25	298	29.2	11.9	20.55	56	13.0425	18.0508	8.67965	1.95225	3.60919
						2017	10	26	299	28.9	9.1	19	55.5	12.1207	19.1992	8.62941	1.8625	3.68804
						2017	10	27	300	27.8	7.6	17.7	56	6.30574	10.1901	4.53452	0.944121	2.06057
						2017	10	28	301	19.8	12	15.9	56.5	15.123	9.43678	6.75782	1.33569	1.83869
						2017	10	29	302	21.1	7.8	14.45	52	9.38566	9.98634	5.4766	1.03588	1.83688
						2017	10	30	303	23.1	9.7	16.4	58	9.68657	10.384	5.67338	1.13798	2.01968
						2017	10	31	304	16.4	11.2	13.8	63	24.5811	10.2257	8.96855	1.66218	1.8294
						2017	11	1	305	17.9	10.3	14.1	64	17.7413	10.7867	7.8255	1.4641	1.93416
						2017	11	2	306	19.1	6.3	12.7	71.5	14.8775	15.2345	8.51636	1.52343	2.46233
						2017	11	3	307	20.1	3.5	11.8	69.5	13.5779	18.0315	8.85132	1.53662	2.74644
						2017	11	4	308	20.4	3.2	11.8	71.5	14.3864	19.7958	9.54636	1.65729	2.98724
						2017	11	5	309	22.4	5.1	13.75	70	11.5136	15.9348	7.66221	1.41782	2.67238
						2017	11	6	310	19.1	9	14.05	71	16.4602	13.2998	8.36981	1.56348	2.30742
						2017	11	7	311	22.1	7.9	15	68.5	14.1181	16.0382	8.51217	1.6375	2.80986
						2017	11	8	312	17.8	10.7	14.25	56.5	18.7678	10.6601	8.00136	1.50404	1.9256
						2017	11	9	313	19.3	11.4	15.35	57.5	16.4515	10.3974	7.39843	1.43844	1.95786
						2017	11	10	314	18.6	5.9	12.25	53	10.4419	10.609	5.95391	1.04934	1.7697
						2017	11	11	315	19.3	4	11.65	49.5	11.4603	14.0274	7.17233	1.23884	2.19976
						2017	11	12	316	19.6	2.3	10.95	53	10.5258	14.5677	7.00485	1.18115	2.17899
						2017	11	13	317	19.3	1.2	10.25	55	9.29412	13.4579	6.32656	1.0408	1.95657
						2017	11	14	318	20.8	2.6	11.7	55.5	5.4041	7.86837	3.68875	0.638218	1.35277
						2017	11	15	319	20.4	3.3	11.85	62.5	7.73947	10.5876	5.1207	0.890476	1.73449
						2017	11	16	320	21.4	2.3	11.85	60.5	10.8618	16.5969	7.59522	1.32079	2.55666
						2017	11	17	321	20.5	1.4	10.95	59	11.2331	17.1642	7.85481	1.32447	2.51862
						2017	11	18	322	21.2	2	11.6	64.5	9.75853	14.9891	6.84156	1.1797	2.30889
						2017	11	19	323	15.5	4.7	10.1	71	12.231	10.5676	6.43123	1.05237	1.57892
						2017	11	20	324	16.4	6.2	11.3	85.5	5.56356	4.53986	2.84297	0.485214	0.883058
						2017	11	21	325	17.6	10.3	13.95	74	8.97361	5.24059	3.87926	0.722371	1.09503
						2017	11	22	326	13.5	5.3	9.4	67	6.78535	4.45119	3.10885	0.495948	0.78119
						2017	11	23	327	10.7	-2.7	4	75.5	9.96537	10.6829	5.83668	0.74626	0.833598
						2017	11	24	328	9.8	0.1	4.95	80.5	11.9985	9.3108	5.97904	0.797775	0.876919
						2017	11	25	329	11.6	1.7	6.65	57.5	8.45005	6.69244	4.25399	0.610019	0.836258
						2017	11	26	330	12.1	0.1	6.1	64.5	7.42962	7.13244	4.11791	0.577222	0.826523
						2017	11	27	331	13.2	-1.6	5.8	58	9.84965	11.662	6.06278	0.839173	1.18875
						2017	11	28	332	13.4	6.1	9.75	61.5	13.2013	7.70957	5.70688	0.922122	1.19674
						2017	11	29	333	13.3	7.4	10.35	66.5	8.27405	3.90535	3.21562	0.530897	0.75882
						2017	11	30	334	12.7	3.8	8.25	73	10.4209	7.41967	4.97416	0.759968	1.04606
						2017	12	1	335	10.3	1.2	5.75	68	10.4836	7.63203	5.05999	0.69889	0.835158
						2017	12	2	336	9.9	-0.7	4.6	70	11.0116	9.33784	5.73619	0.753598	0.831434
						2017	12	3	337	12.6	-2.3	5.15	62.5	8.83353	10.5296	5.45566	0.734342	0.999858
						2017	12	4	338	14.8	-2.3	6.25	63.5	9.06208	12.3969	5.99578	0.845725	1.32087
						2017	12	5	339	12.4	0.5	6.45	50.5	10.5445	10.0383	5.81993	0.827747	1.13056
						2017	12	6	340	13.3	5	9.15	51	11.7356	7.79246	5.4096	0.855051	1.16073
						2017	12	7	341	10.3	0.6	5.45	59.5	9.27192	7.19501	4.62035	0.630037	0.767091
						2017	12	8	342	10.6	-3.1	3.75	61.5	7.62505	8.35706	4.51568	0.57074	0.647718
						2017	12	9	343	10.3	-4	3.15	64	4.55691	5.21311	2.75714	0.338775	0.392919
						2017	12	10	344	10.7	-3.2	3.75	65.5	5.72751	6.36899	3.41659	0.431826	0.524457
						2017	12	11	345	10.2	-4.6	2.8	66	9.93808	11.7667	6.11721	0.739075	0.675708
						2017	12	12	346	11.6	-3.9	3.85	77.5	9.402	11.6585	5.92251	0.752024	0.870494
						2017	12	13	347	12.4	-4.1	4.15	66.5	9.72143	12.8323	6.31818	0.813382	1.00248
						2017	12	14	348	14.4	-1.6	6.4	64	7.87679	10.0823	5.04115	0.715505	1.1285
						2017	12	15	349	14.4	-3	5.7	75	8.80796	12.2607	5.87855	0.810226	1.22501
						2017	12	16	350	13.4	-3	5.2	81.5	9.04022	11.8608	5.85761	0.790163	1.1133
						2017	12	17	351	9.3	4.9	7.1	76.5	16.767	5.90199	5.62733	0.821807	0.795944
						2017	12	18	352	15.5	2.2	8.85	71.5	10.5553	11.2308	6.15908	0.962678	1.53231
						2017	12	19	353	9.4	0.8	5.1	65	12.0824	8.31268	5.6692	0.761421	0.81824
						2017	12	20	354	14.8	6.7	10.75	63	11.7877	7.63842	5.36773	0.898804	1.25903
						2017	12	21	355	16	5	10.5	59.5	5.01026	4.40903	2.65874	0.441297	0.829582
						2017	12	22	356	13.5	2.7	8.1	67	4.29996	3.71517	2.26098	0.343451	0.631029
						2017	12	23	357	15.9	8.1	12	63	3.4575	2.15748	1.545	0.270031	0.585208
						2017	12	24	358	15.7	9.4	12.55	54.5	5.50486	2.77445	2.21074	0.393517	0.686938
						2017	12	25	359	10.5	4.1	7.3	60	12.1957	6.2442	4.93647	0.726706	0.845753
						2017	12	26	360	12.5	-0.3	6.1	63	6.82432	6.98811	3.90647	0.547584	0.813588
						2017	12	27	361	11	-1.5	4.75	62	6.85392	6.85392	3.87716	0.512777	0.666831
						2017	12	28	362	10	-1.1	4.45	73	6.37004	5.6566	3.39566	0.443121	0.549431
						2017	12	29	363	13.2	0.8	7	83.5	1.64235	1.62921	0.925327	0.134591	0.366849
						2017	12	30	364	17.6	5.3	11.45	94.5	6.99896	6.88697	3.92741	0.673751	1.20468
						2017	12	31	365	17.6	2.4	10	95.5	2.91978	3.55046	1.82134	0.296965	0.699416
																	965.165	2001.01
																	ETo-HS	ETo-TURC (Ousman Couly (2016)

[truncated: 2 more sheets: Monthly average, Calc. Rs. ]
