# Supplementary material for: Assessing of evapotranspiration models using limited climatic data in Southeast Anatolian Project Region of Turkey
Source: PeerJ. 2021 Jun 9;9:e11571. doi: 10.7717/peerj.11571 (PMC8197036; doi:10.7717/peerj.11571)
Supplement: Supplemental Information 9 [file peerj-09-11571-s009.xlsx]

## Sheet: İst-ETo-Kilis
		2008-2017 Average ETo values
				ETo-TURC (Ousman Couly (2016)
		O	i		hs-pm	Absolute value (hs-pm)	(hs-pm)2	hs/pm	Turc-pm	Absolute value (Turc-pm)	(Turc-pm)2	Turc/pm
		ETo-PM	ETo-HS
	1	0.66	1.05512	1.01442	0.39512	0.39512	0.15612	1.59867	0.354417	0.354417	0.125611	1.537
	2	0.76	0.925243	0.839322	0.165243	0.165243	0.0273054	1.21743	0.0793222	0.0793222	0.00629201	1.10437
	3	0.89	0.701937	0.805957	-0.188063	0.188063	0.0353678	0.788693	-0.0840426	0.0840426	0.00706315	0.90557
	4	0.93	0.840088	0.804249	-0.0899124	0.0899124	0.00808424	0.90332	-0.125751	0.125751	0.0158133	0.864784
	5	0.71	0.967273	0.887864	0.257273	0.257273	0.0661893	1.36236	0.177864	0.177864	0.0316357	1.25051
	6	0.71	0.999585	1.05141	0.289585	0.289585	0.0838595	1.40787	0.341405	0.341405	0.116558	1.48085
	7	0.68	0.792729	0.786226	0.112729	0.112729	0.0127079	1.16578	0.106226	0.106226	0.0112839	1.15621
	8	0.8	1.13513	1.06518	0.335127	0.335127	0.11231	1.41891	0.265183	0.265183	0.0703218	1.33148
	9	0.77	1.06622	0.925765	0.296222	0.296222	0.0877474	1.3847	0.155765	0.155765	0.0242629	1.20229
	10	0.94	1.43917	1.236	0.49917	0.49917	0.249171	1.53103	0.296	0.296	0.0876162	1.31489
	11	0.87	1.44375	1.08978	0.573746	0.573746	0.329185	1.65948	0.219776	0.219776	0.0483013	1.25262
	12	0.8	1.34549	1.06355	0.545491	0.545491	0.297561	1.68186	0.263546	0.263546	0.0694565	1.32943
	13	0.67	1.17157	0.935629	0.501568	0.501568	0.25157	1.74861	0.265629	0.265629	0.0705586	1.39646
	14	0.76	1.07359	0.947468	0.313593	0.313593	0.0983409	1.41262	0.187468	0.187468	0.0351443	1.24667
	15	0.83	1.30116	1.2884	0.471165	0.471165	0.221996	1.56767	0.458402	0.458402	0.210133	1.55229
	16	0.89	0.903135	0.866082	0.0131354	0.0131354	0.000172539	1.01476	-0.0239176	0.0239176	0.000572051	0.973126
	17	0.91	1.30444	1.2533	0.394437	0.394437	0.155581	1.43345	0.343304	0.343304	0.117858	1.37726
	18	0.88	1.14865	1.33638	0.268652	0.268652	0.072174	1.30529	0.456384	0.456384	0.208287	1.51862
	19	0.81	1.61326	1.77386	0.803257	0.803257	0.645222	1.99168	0.963856	0.963856	0.929019	2.18995
	20	0.93	1.75062	1.78023	0.820619	0.820619	0.673415	1.88239	0.850227	0.850227	0.722887	1.91422
	21	1.09	2.01881	1.97967	0.928806	0.928806	0.862681	1.85212	0.889667	0.889667	0.791507	1.81621
	22	1	1.52571	1.54615	0.525706	0.525706	0.276366	1.52571	0.54615	0.54615	0.29828	1.54615
	23	0.99	1.62817	1.74754	0.638173	0.638173	0.407265	1.64462	0.757542	0.757542	0.57387	1.76519
	24	1.13	1.63402	1.78489	0.504016	0.504016	0.254032	1.44603	0.654891	0.654891	0.428882	1.57955
	25	0.96	1.79969	1.49472	0.839689	0.839689	0.705077	1.87468	0.534717	0.534717	0.285922	1.557
	26	0.95	1.781	1.1648	0.830999	0.830999	0.690559	1.87474	0.214803	0.214803	0.0461402	1.22611
	27	0.89	1.39599	1.10491	0.505993	0.505993	0.256029	1.56853	0.214907	0.214907	0.0461852	1.24147
	28	0.95	1.79488	1.51412	0.844879	0.844879	0.71382	1.88935	0.56412	0.56412	0.318231	1.59381
	29	1.33	1.5831	1.54064	0.253095	0.253095	0.0640571	1.1903	0.210643	0.210643	0.0443705	1.15838
	30	1.17	2.01481	2.0452	0.844809	0.844809	0.713703	1.72206	0.875204	0.875204	0.765981	1.74804
	31	1.24	1.8872	1.58714	0.6472	0.6472	0.418867	1.52194	0.347139	0.347139	0.120505	1.27995
	32	1.28	2.44556	2.28712	1.16556	1.16556	1.35853	1.91059	1.00712	1.00712	1.0143	1.78682
	33	1.18	1.77501	2.10905	0.595013	0.595013	0.35404	1.50425	0.929046	0.929046	0.863126	1.78733
	34	1.38	1.81843	2.15891	0.43843	0.43843	0.192221	1.3177	0.778911	0.778911	0.606703	1.56443
	35	1.38	2.05208	2.10367	0.672081	0.672081	0.451693	1.48702	0.723666	0.723666	0.523693	1.5244
	36	1.28	2.01492	2.23435	0.734916	0.734916	0.540101	1.57415	0.954352	0.954352	0.910789	1.74559
	37	1.43	2.33013	2.49204	0.90013	0.90013	0.810234	1.62946	1.06204	1.06204	1.12793	1.74269
	38	1.42	2.26858	2.46129	0.848585	0.848585	0.720096	1.5976	1.04129	1.04129	1.08429	1.73331
	39	1.57	2.72986	3.1109	1.15986	1.15986	1.34528	1.73877	1.5409	1.5409	2.37437	1.98146
	40	1.67	2.24671	2.31989	0.576713	0.576713	0.332597	1.34534	0.649887	0.649887	0.422353	1.38915
	41	1.49	2.36443	2.71836	0.874432	0.874432	0.764632	1.58687	1.22836	1.22836	1.50886	1.8244
	42	1.57	2.60291	2.82834	1.03291	1.03291	1.06691	1.65791	1.25834	1.25834	1.58341	1.80149
	43	1.5	2.13195	2.39394	0.631954	0.631954	0.399366	1.4213	0.893941	0.893941	0.799131	1.59596
	44	1.55	2.31237	2.63052	0.762372	0.762372	0.581211	1.49185	1.08052	1.08052	1.16753	1.69711
	45	1.43	2.18527	2.50417	0.75527	0.75527	0.570433	1.52816	1.07417	1.07417	1.15384	1.75117
	46	1.69	2.80751	2.8038	1.11751	1.11751	1.24883	1.66125	1.1138	1.1138	1.24056	1.65906
	47	1.71	2.75316	3.1879	1.04316	1.04316	1.08818	1.61003	1.4779	1.4779	2.1842	1.86427
	48	1.73	2.92817	3.58941	1.19817	1.19817	1.43562	1.69259	1.85941	1.85941	3.45741	2.0748
	49	1.7	2.4494	3.32048	0.749396	0.749396	0.561594	1.44082	1.62048	1.62048	2.62596	1.95322
	50	1.78	2.83542	3.77877	1.05542	1.05542	1.1139	1.59293	1.99877	1.99877	3.99509	2.12291
	51	1.8	2.65698	3.13766	0.856978	0.856978	0.734412	1.4761	1.33766	1.33766	1.78935	1.74315
	52	1.86	2.69307	3.27406	0.833073	0.833073	0.69401	1.44789	1.41406	1.41406	1.99957	1.76025
	53	2.23	3.34188	3.87362	1.11188	1.11188	1.23629	1.4986	1.64362	1.64362	2.70148	1.73705
	54	2.09	3.34487	3.70437	1.25487	1.25487	1.5747	1.60042	1.61437	1.61437	2.6062	1.77243
	55	1.95	2.89378	3.44332	0.943779	0.943779	0.890718	1.48399	1.49332	1.49332	2.23	1.76581
	56	1.94	3.01757	3.57505	1.07757	1.07757	1.16116	1.55545	1.63505	1.63505	2.67339	1.84281
	57	2.11	3.00899	3.88285	0.898993	0.898993	0.808188	1.42606	1.77285	1.77285	3.14301	1.84021
	58	2.08	2.86988	3.49476	0.789878	0.789878	0.623906	1.37975	1.41476	1.41476	2.00155	1.68017
	59	2.14	3.06823	3.74739	0.928233	0.928233	0.861616	1.43375	1.60739	1.60739	2.5837	1.75112
	60	2.38	3.15203	3.80249	0.772028	0.772028	0.596028	1.32438	1.42249	1.42249	2.02347	1.59768
	61	2.27	3.43453	4.19347	1.16453	1.16453	1.35612	1.51301	1.92347	1.92347	3.69972	1.84734
	62	2.07	2.9315	3.58636	0.861503	0.861503	0.742187	1.41618	1.51636	1.51636	2.29935	1.73254
	63	2.31	3.17426	3.83121	0.864258	0.864258	0.746943	1.37414	1.52121	1.52121	2.31409	1.65853
	64	2.45	3.45429	4.4254	1.00429	1.00429	1.0086	1.40992	1.9754	1.9754	3.9022	1.80629
	65	2.61	3.41353	4.58925	0.803529	0.803529	0.645659	1.30787	1.97925	1.97925	3.91745	1.75833
	66	2.56	3.52114	4.733	0.96114	0.96114	0.923791	1.37545	2.173	2.173	4.72193	1.84883
	67	2.51	3.74284	4.59622	1.23284	1.23284	1.51988	1.49117	2.08622	2.08622	4.35231	1.83116
	68	2.97	3.83008	5.12842	0.860076	0.860076	0.739731	1.28959	2.15842	2.15842	4.65876	1.72674
	69	2.71	3.53159	4.74625	0.821588	0.821588	0.675007	1.30317	2.03625	2.03625	4.1463	1.75138
	70	2.62	3.48831	4.30793	0.868309	0.868309	0.75396	1.33142	1.68793	1.68793	2.84912	1.64425
	71	2.62	3.4587	4.53116	0.838696	0.838696	0.703411	1.32011	1.91116	1.91116	3.65254	1.72945
	72	2.56	3.57619	4.45033	1.01619	1.01619	1.03264	1.39695	1.89033	1.89033	3.57336	1.73841
	73	2.64	3.68426	4.79201	1.04426	1.04426	1.09048	1.39555	2.15201	2.15201	4.63115	1.81516
	74	2.32	3.09803	3.82367	0.778028	0.778028	0.605327	1.33536	1.50367	1.50367	2.26103	1.64813
	75	2.76	3.52478	4.45833	0.764783	0.764783	0.584892	1.2771	1.69833	1.69833	2.88433	1.61534
	76	2.51	3.02528	4.10482	0.515276	0.515276	0.26551	1.20529	1.59482	1.59482	2.54344	1.63539
	77	2.79	3.59113	4.8794	0.801131	0.801131	0.64181	1.28714	2.0894	2.0894	4.3656	1.74889
	78	2.85	3.47709	4.90646	0.627088	0.627088	0.39324	1.22003	2.05646	2.05646	4.22903	1.72156
	79	2.81	3.59358	4.74697	0.783582	0.783582	0.614	1.27885	1.93697	1.93697	3.75185	1.68931
	80	2.88	3.78879	5.06916	0.908791	0.908791	0.825901	1.31555	2.18916	2.18916	4.79244	1.76013
	81	2.91	3.50234	4.86171	0.59234	0.59234	0.350867	1.20355	1.95171	1.95171	3.80918	1.67069
	82	3.03	3.76885	5.52899	0.738853	0.738853	0.545904	1.24385	2.49899	2.49899	6.24496	1.82475
	83	3.3	3.70978	5.65873	0.409776	0.409776	0.167916	1.12417	2.35873	2.35873	5.56361	1.71477
	84	3.41	4.10681	6.14526	0.696809	0.696809	0.485543	1.20434	2.73526	2.73526	7.48165	1.80213
	85	3.23	4.16213	6.02285	0.932131	0.932131	0.868868	1.28859	2.79285	2.79285	7.8	1.86466
	86	3.12	3.96901	5.70891	0.84901	0.84901	0.720817	1.27212	2.58891	2.58891	6.70246	1.82978
	87	3.05	3.99765	5.42678	0.947646	0.947646	0.898033	1.3107	2.37678	2.37678	5.64908	1.77927
	88	3.2	4.13371	5.23529	0.933713	0.933713	0.87182	1.29179	2.03529	2.03529	4.14239	1.63603
	89	3.04	3.80578	4.98848	0.765784	0.765784	0.586425	1.2519	1.94848	1.94848	3.79657	1.64095
	90	2.95	3.53202	4.99635	0.582018	0.582018	0.338745	1.19729	2.04635	2.04635	4.18756	1.69368
	91	3.06	3.59324	4.87998	0.533244	0.533244	0.284349	1.17426	1.81998	1.81998	3.31231	1.59476
	92	3.06	3.69713	5.41304	0.637128	0.637128	0.405932	1.20821	2.35304	2.35304	5.53678	1.76897
	93	3.63	4.13691	6.54401	0.506915	0.506915	0.256962	1.13965	2.91401	2.91401	8.49144	1.80276
	94	3.51	4.4895	6.62125	0.9795	0.9795	0.959419	1.27906	3.11125	3.11125	9.67989	1.8864
	95	3.49	4.49681	6.80949	1.00681	1.00681	1.01367	1.28849	3.31949	3.31949	11.019	1.95114
	96	3.62	4.5184	7.09428	0.898402	0.898402	0.807126	1.24818	3.47428	3.47428	12.0706	1.95975
	97	3.64	4.31312	6.48642	0.67312	0.67312	0.45309	1.18492	2.84642	2.84642	8.1021	1.78198
	98	3.35	4.04909	6.10437	0.69909	0.69909	0.488727	1.20868	2.75437	2.75437	7.58657	1.8222
	99	3.36	4.30399	6.38647	0.943995	0.943995	0.891126	1.28095	3.02647	3.02647	9.15951	1.90073
	100	3.28	4.15049	5.65977	0.870485	0.870485	0.757745	1.26539	2.37977	2.37977	5.66329	1.72554
	101	3.36	4.24824	5.83665	0.888236	0.888236	0.788963	1.26436	2.47665	2.47665	6.1338	1.7371
	102	3.54	4.33633	5.76556	0.796334	0.796334	0.634147	1.22495	2.22556	2.22556	4.95314	1.62869
	103	3.32	3.99863	5.54772	0.678629	0.678629	0.460538	1.20441	2.22772	2.22772	4.96274	1.671
	104	3.56	4.24669	6.15145	0.686694	0.686694	0.471549	1.19289	2.59145	2.59145	6.71559	1.72793
	105	3.85	4.35722	6.32278	0.507223	0.507223	0.257276	1.13175	2.47278	2.47278	6.11464	1.64228
	106	3.94	4.58933	6.37244	0.649326	0.649326	0.421624	1.1648	2.43244	2.43244	5.91674	1.61737
	107	3.94	4.71084	7.01407	0.770839	0.770839	0.594192	1.19564	3.07407	3.07407	9.44993	1.78022
	108	3.92	4.73082	7.11728	0.810821	0.810821	0.657431	1.20684	3.19728	3.19728	10.2226	1.81563
	109	4.07	4.58008	7.04363	0.51008	0.51008	0.260182	1.12533	2.97363	2.97363	8.8425	1.73062
	110	3.92	4.83115	7.38939	0.911146	0.911146	0.830186	1.23244	3.46939	3.46939	12.0366	1.88505
	111	3.74	4.73906	7.50329	0.999057	0.999057	0.998115	1.26713	3.76329	3.76329	14.1623	2.00623
	112	3.68	4.70023	7.22943	1.02023	1.02023	1.04088	1.27724	3.54943	3.54943	12.5985	1.96452
	113	3.66	4.53538	7.41261	0.87538	0.87538	0.76629	1.23917	3.75261	3.75261	14.0821	2.0253
	114	4.14	4.5138	7.36824	0.373803	0.373803	0.139729	1.09029	3.22824	3.22824	10.4215	1.77977
	115	4	4.47067	6.83325	0.470666	0.470666	0.221526	1.11767	2.83325	2.83325	8.0273	1.70831
	116	4.2	5.0339	7.94845	0.833896	0.833896	0.695382	1.19855	3.74845	3.74845	14.0509	1.89249
	117	4.04	4.82689	7.68554	0.786886	0.786886	0.61919	1.19477	3.64554	3.64554	13.29	1.90236
	118	3.76	4.27008	6.21278	0.510078	0.510078	0.260179	1.13566	2.45278	2.45278	6.01614	1.65234
	119	4.1	4.73515	7.9742	0.635153	0.635153	0.40342	1.15492	3.8742	3.8742	15.0095	1.94493
	120	4.55	4.88146	8.31914	0.331461	0.331461	0.109867	1.07285	3.76914	3.76914	14.2065	1.82838
	121	3.92	4.49071	7.04861	0.57071	0.57071	0.32571	1.14559	3.12861	3.12861	9.78818	1.79811
	122	3.89	4.54873	6.8501	0.658734	0.658734	0.43393	1.16934	2.9601	2.9601	8.76219	1.76095
	123	4.19	4.70447	6.6281	0.514471	0.514471	0.26468	1.12279	2.4381	2.4381	5.94434	1.58189
	124	4.52	4.93869	7.4083	0.41869	0.41869	0.175301	1.09263	2.8883	2.8883	8.34226	1.639
	125	4.49	4.83264	7.21498	0.342641	0.342641	0.117403	1.07631	2.72498	2.72498	7.42551	1.6069
	126	4.13	4.73021	7.18513	0.600209	0.600209	0.360251	1.14533	3.05513	3.05513	9.33384	1.73974
	127	3.9	4.49006	7.09042	0.590057	0.590057	0.348167	1.1513	3.19042	3.19042	10.1788	1.81806
	128	3.93	4.57899	6.86011	0.648985	0.648985	0.421182	1.16514	2.93011	2.93011	8.58557	1.74558
	129	4.17	4.51865	7.05105	0.348647	0.348647	0.121554	1.08361	2.88105	2.88105	8.30044	1.6909
	130	4.06	4.97002	7.88932	0.910021	0.910021	0.828138	1.22414	3.82932	3.82932	14.6637	1.94318
	131	4.29	5.20886	7.42447	0.918862	0.918862	0.844307	1.21419	3.13447	3.13447	9.82489	1.73065
	132	4.28	4.9949	7.69686	0.714904	0.714904	0.511088	1.16703	3.41686	3.41686	11.6749	1.79833
	133	4.33	4.68721	7.33599	0.357209	0.357209	0.127598	1.0825	3.00599	3.00599	9.03597	1.69422
	134	4.48	4.90471	7.95392	0.424712	0.424712	0.180381	1.0948	3.47392	3.47392	12.0681	1.77543
	135	4.26	4.85938	7.94011	0.599384	0.599384	0.359261	1.1407	3.68011	3.68011	13.5432	1.86388
	136	4.33	4.93595	7.86297	0.605953	0.605953	0.367179	1.13994	3.53297	3.53297	12.4819	1.81593
	137	4.22	5.01185	7.71691	0.791853	0.791853	0.627031	1.18764	3.49691	3.49691	12.2284	1.82865
	138	4.34	4.89989	7.66113	0.559888	0.559888	0.313474	1.12901	3.32113	3.32113	11.0299	1.76524
	139	4.29	4.73489	7.6718	0.444888	0.444888	0.197925	1.1037	3.3818	3.3818	11.4366	1.7883
	140	4.06	4.36115	7.09445	0.30115	0.30115	0.0906911	1.07417	3.03445	3.03445	9.20787	1.7474
	141	4.27	4.64555	7.23469	0.375549	0.375549	0.141037	1.08795	2.96469	2.96469	8.7894	1.69431
	142	4.23	4.7334	7.37148	0.503397	0.503397	0.253409	1.11901	3.14148	3.14148	9.86891	1.74267
	143	4.31	4.33907	7.00769	0.0290651	0.0290651	0.000844781	1.00674	2.69769	2.69769	7.27753	1.62591
	144	4.42	4.73205	7.17813	0.312049	0.312049	0.0973746	1.0706	2.75813	2.75813	7.60728	1.62401
	145	4.5	4.80831	7.4226	0.308306	0.308306	0.0950527	1.06851	2.9226	2.9226	8.54162	1.64947
	146	4.37	4.52469	7.37468	0.154689	0.154689	0.0239288	1.0354	3.00468	3.00468	9.02812	1.68757
	147	4.53	4.82334	7.75008	0.293336	0.293336	0.0860458	1.06475	3.22008	3.22008	10.3689	1.71083
	148	4.67	4.82719	7.90347	0.157195	0.157195	0.0247103	1.03366	3.23347	3.23347	10.4553	1.69239
	149	4.79	4.9019	7.86537	0.111905	0.111905	0.0125226	1.02336	3.07537	3.07537	9.45792	1.64204
	150	4.67	5.09625	8.64075	0.426253	0.426253	0.181692	1.09127	3.97075	3.97075	15.7669	1.85027
	151	4.71	5.21823	8.26563	0.508226	0.508226	0.258293	1.1079	3.55563	3.55563	12.6425	1.75491
	152	4.69	5.3896	8.28223	0.699599	0.699599	0.489438	1.14917	3.59223	3.59223	12.9041	1.76593
	153	4.66	5.33734	8.57575	0.677341	0.677341	0.458791	1.14535	3.91575	3.91575	15.3331	1.84029
	154	4.55	5.59881	9.08669	1.04881	1.04881	1.1	1.23051	4.53669	4.53669	20.5815	1.99707
	155	4.62	5.75448	10.0117	1.13448	1.13448	1.28705	1.24556	5.39168	5.39168	29.0702	2.16703
	156	5.06	5.85911	10.0509	0.799108	0.799108	0.638574	1.15793	4.99092	4.99092	24.9093	1.98635
	157	5.24	5.72361	9.29089	0.483606	0.483606	0.233875	1.09229	4.05089	4.05089	16.4097	1.77307
	158	4.97	5.8166	9.85614	0.8466	0.8466	0.716731	1.17034	4.88614	4.88614	23.8744	1.98313
	159	4.55	5.39527	9.04794	0.845272	0.845272	0.714485	1.18577	4.49794	4.49794	20.2315	1.98856
	160	4.82	5.65055	10.2929	0.830548	0.830548	0.68981	1.17231	5.4729	5.4729	29.9527	2.13546
	161	5.2	5.96113	10.0282	0.761129	0.761129	0.579317	1.14637	4.82821	4.82821	23.3116	1.9285
	162	5.23	5.82836	9.8422	0.598364	0.598364	0.358039	1.11441	4.6122	4.6122	21.2724	1.88187
	163	5.62	5.78783	9.88528	0.167827	0.167827	0.028166	1.02986	4.26528	4.26528	18.1926	1.75895
	164	5.33	5.98447	9.90916	0.654466	0.654466	0.428325	1.12279	4.57916	4.57916	20.9687	1.85913
	165	4.88	5.8025	9.94807	0.922502	0.922502	0.851011	1.18904	5.06807	5.06807	25.6853	2.03854
	166	4.56	5.40288	9.50768	0.842883	0.842883	0.710452	1.18484	4.94768	4.94768	24.4795	2.08502
	167	5.2	5.96932	10.5219	0.769316	0.769316	0.591847	1.14795	5.32187	5.32187	28.3223	2.02344
	168	5.73	6.10129	10.5452	0.37129	0.37129	0.137856	1.0648	4.81523	4.81523	23.1865	1.84035
	169	6.09	6.44471	10.7452	0.354711	0.354711	0.12582	1.05824	4.65519	4.65519	21.6708	1.7644
	170	6.56	6.2278	10.3682	-0.332196	0.332196	0.110354	0.94936	3.80819	3.80819	14.5023	1.58052
	171	6.07	6.0366	10.3929	-0.0333954	0.0333954	0.00111525	0.994498	4.32293	4.32293	18.6877	1.71218
	172	5.91	6.27412	10.5529	0.364117	0.364117	0.132581	1.06161	4.64287	4.64287	21.5562	1.7856
	173	6.05	6.4542	11.1672	0.404204	0.404204	0.163381	1.06681	5.11717	5.11717	26.1854	1.84581
	174	5.28	6.41996	10.7849	1.13996	1.13996	1.2995	1.2159	5.50486	5.50486	30.3034	2.04259
	175	5.34	6.36605	10.8234	1.02605	1.02605	1.05277	1.19214	5.48343	5.48343	30.068	2.02686
	176	5.55	6.39085	11.0231	0.840853	0.840853	0.707035	1.15151	5.47306	5.47306	29.9544	1.98614
	177	6.23	6.38149	10.8012	0.15149	0.15149	0.0229491	1.02432	4.57119	4.57119	20.8958	1.73374
	178	5.95	6.18524	10.6343	0.235238	0.235238	0.0553371	1.03954	4.68434	4.68434	21.9431	1.78728
	179	5.71	6.1201	10.8394	0.410096	0.410096	0.168179	1.07182	5.12935	5.12935	26.3103	1.89831
	180	5.81	5.89714	10.6394	0.0871439	0.0871439	0.00759405	1.015	4.82938	4.82938	23.323	1.83122
	181	5.14	5.33001	9.75056	0.190012	0.190012	0.0361046	1.03697	4.61056	4.61056	21.2573	1.897
	182	5.84	5.74246	10.8094	-0.0975406	0.0975406	0.00951417	0.983298	4.96943	4.96943	24.6953	1.85093
	183	5.73	6.0659	10.8697	0.335901	0.335901	0.112829	1.05862	5.13968	5.13968	26.4163	1.89698
	184	5.92	6.15707	11.084	0.237067	0.237067	0.0562008	1.04005	5.164	5.164	26.6669	1.8723
	185	5.99	6.01652	10.7598	0.0265221	0.0265221	0.000703424	1.00443	4.76982	4.76982	22.7512	1.7963
	186	5.5	5.94588	10.4552	0.445876	0.445876	0.198805	1.08107	4.95524	4.95524	24.5544	1.90095
	187	5.29	5.81662	9.92109	0.526621	0.526621	0.277329	1.09955	4.63109	4.63109	21.447	1.87544
	188	5.41	5.8576	10.2906	0.447597	0.447597	0.200343	1.08274	4.88056	4.88056	23.8199	1.90214
	189	5.93	5.56588	10.2425	-0.364123	0.364123	0.132585	0.938597	4.3125	4.3125	18.5976	1.72723
	190	5.64	5.57253	10.0075	-0.0674733	0.0674733	0.00455265	0.988037	4.36755	4.36755	19.0755	1.77439
	191	5.32	5.96673	10.2029	0.646731	0.646731	0.418261	1.12157	4.88285	4.88285	23.8422	1.91783
	192	5.91	6.19166	10.1599	0.28166	0.28166	0.0793324	1.04766	4.24994	4.24994	18.062	1.71911
	193	5.83	6.07552	10.5544	0.245518	0.245518	0.060279	1.04211	4.72442	4.72442	22.3202	1.81036
	194	5.34	5.79597	10.177	0.455968	0.455968	0.207907	1.08539	4.83702	4.83702	23.3968	1.90581
	195	5.66	6.09494	10.6617	0.434943	0.434943	0.189176	1.07685	5.0017	5.0017	25.017	1.88369
	196	6.02	6.07328	10.3108	0.0532796	0.0532796	0.00283871	1.00885	4.29079	4.29079	18.4109	1.71276
	197	5.9	5.82781	10.4775	-0.0721918	0.0721918	0.00521166	0.987764	4.5775	4.5775	20.9535	1.77585
	198	5.72	5.54628	10.1921	-0.17372	0.17372	0.0301787	0.969629	4.47213	4.47213	19.9999	1.78184
	199	5.44	5.47059	9.9136	0.0305894	0.0305894	0.000935712	1.00562	4.4736	4.4736	20.0131	1.82235
	200	4.95	5.47503	9.93736	0.525028	0.525028	0.275655	1.10607	4.98736	4.98736	24.8738	2.00755
	201	4.74	5.66097	9.85634	0.92097	0.92097	0.848186	1.1943	5.11634	5.11634	26.177	2.0794
	202	5.2	5.69781	9.87987	0.497805	0.497805	0.24781	1.09573	4.67987	4.67987	21.9012	1.89998
	203	5.4	5.45105	9.33484	0.0510536	0.0510536	0.00260647	1.00945	3.93484	3.93484	15.483	1.72867
	204	5.89	5.87225	10.3121	-0.0177456	0.0177456	0.000314907	0.996987	4.42208	4.42208	19.5548	1.75078
	205	5.53	5.75592	10.4723	0.225915	0.225915	0.0510378	1.04085	4.9423	4.9423	24.4263	1.89372
	206	5.19	5.64177	9.58937	0.451775	0.451775	0.2041	1.08705	4.39937	4.39937	19.3545	1.84766
	207	5.25	5.50825	9.80153	0.258251	0.258251	0.0666935	1.04919	4.55153	4.55153	20.7165	1.86696
	208	5.26	6.18377	10.6894	0.923769	0.923769	0.85335	1.17562	5.42939	5.42939	29.4783	2.0322
	209	5.39	6.01033	10.4708	0.620329	0.620329	0.384808	1.11509	5.08076	5.08076	25.8141	1.94263
	210	5.25	5.80394	10.416	0.553938	0.553938	0.306847	1.10551	5.16602	5.16602	26.6878	1.984
	211	5.04	5.934	9.91168	0.893999	0.893999	0.799234	1.17738	4.87168	4.87168	23.7333	1.9666
	212	4.73	6.00555	10.4915	1.27555	1.27555	1.62702	1.26967	5.76146	5.76146	33.1945	2.21807
	213	4.83	5.76329	9.52507	0.933295	0.933295	0.871039	1.19323	4.69507	4.69507	22.0436	1.97206
	214	5.27	5.87366	9.17243	0.60366	0.60366	0.364405	1.11455	3.90243	3.90243	15.229	1.7405
	215	5.63	5.93856	9.2741	0.308562	0.308562	0.0952103	1.05481	3.6441	3.6441	13.2795	1.64726
	216	5.46	5.93034	9.02444	0.470337	0.470337	0.221217	1.08614	3.56444	3.56444	12.7053	1.65283
	217	4.99	5.79773	9.15348	0.807725	0.807725	0.65242	1.16187	4.16348	4.16348	17.3346	1.83437
	218	4.94	5.91349	9.07006	0.97349	0.97349	0.947682	1.19706	4.13006	4.13006	17.0574	1.83604
	219	5.26	5.38291	8.90715	0.122909	0.122909	0.0151066	1.02337	3.64715	3.64715	13.3017	1.69337
	220	4.76	5.41333	8.80406	0.653334	0.653334	0.426845	1.13726	4.04406	4.04406	16.3544	1.84959
	221	4.75	5.47366	8.27054	0.723662	0.723662	0.523686	1.15235	3.52054	3.52054	12.3942	1.74117
	222	4.96	5.73492	8.54465	0.774918	0.774918	0.600498	1.15623	3.58465	3.58465	12.8497	1.72271
	223	5.08	5.63334	9.16457	0.553342	0.553342	0.306187	1.10893	4.08457	4.08457	16.6837	1.80405
	224	4.47	5.38952	8.78357	0.91952	0.91952	0.845518	1.20571	4.31357	4.31357	18.6068	1.965
	225	4.31	4.97962	7.86137	0.669621	0.669621	0.448392	1.15536	3.55137	3.55137	12.6123	1.82398
	226	4.39	5.26157	8.33606	0.871568	0.871568	0.759632	1.19853	3.94606	3.94606	15.5714	1.89887
	227	4.12	5.1943	7.84987	1.0743	1.0743	1.15412	1.26075	3.72987	3.72987	13.9119	1.90531
	228	4.01	5.08624	7.83601	1.07624	1.07624	1.15829	1.26839	3.82601	3.82601	14.6383	1.95412
	229	4.58	5.37502	8.08812	0.795016	0.795016	0.63205	1.17358	3.50812	3.50812	12.3069	1.76596
	230	4.27	4.52789	7.27664	0.257894	0.257894	0.0665094	1.0604	3.00664	3.00664	9.03991	1.70413
	231	4.29	4.83534	7.51865	0.545341	0.545341	0.297397	1.12712	3.22865	3.22865	10.4242	1.7526
	232	3.94	4.95788	7.77661	1.01788	1.01788	1.03608	1.25835	3.83661	3.83661	14.7196	1.97376
	233	3.98	4.57388	7.36672	0.59388	0.59388	0.352694	1.14922	3.38672	3.38672	11.4698	1.85093
	234	4.08	4.62373	7.40482	0.543731	0.543731	0.295643	1.13327	3.32482	3.32482	11.0544	1.81491
	235	4.38	4.90368	7.42687	0.523682	0.523682	0.274243	1.11956	3.04687	3.04687	9.28343	1.69563
	236	4.34	4.6579	7.3262	0.317904	0.317904	0.101063	1.07325	2.9862	2.9862	8.91738	1.68806
	237	3.78	4.36405	7.34535	0.584046	0.584046	0.34111	1.15451	3.56535	3.56535	12.7117	1.94321
	238	3.62	4.39349	7.2286	0.77349	0.77349	0.598287	1.21367	3.6086	3.6086	13.022	1.99685
	239	3.64	4.16284	6.69324	0.522836	0.522836	0.273358	1.14364	3.05324	3.05324	9.32224	1.8388
	240	3.62	4.32406	7.19845	0.704057	0.704057	0.495697	1.19449	3.57845	3.57845	12.8053	1.98852
	241	3.71	4.60012	7.63598	0.890122	0.890122	0.792318	1.23993	3.92598	3.92598	15.4133	2.05822
	242	3.82	4.56021	7.21197	0.740206	0.740206	0.547905	1.19377	3.39197	3.39197	11.5055	1.88795
	243	3.59	4.3679	7.32981	0.777896	0.777896	0.605122	1.21668	3.73981	3.73981	13.9862	2.04173
	244	3.58	4.78477	7.68356	1.20477	1.20477	1.45146	1.33653	4.10356	4.10356	16.8392	2.14625
	245	3.47	4.53098	6.95153	1.06098	1.06098	1.12568	1.30576	3.48153	3.48153	12.121	2.00332
	246	4.15	4.72828	7.63144	0.578281	0.578281	0.334409	1.13934	3.48144	3.48144	12.1204	1.8389
	247	3.97	4.66638	7.45922	0.696379	0.696379	0.484944	1.17541	3.48922	3.48922	12.1746	1.8789
	248	4.03	4.35108	7.11363	0.321081	0.321081	0.103093	1.07967	3.08363	3.08363	9.50879	1.76517
	249	3.72	4.08673	6.57291	0.366731	0.366731	0.134491	1.09858	2.85291	2.85291	8.13908	1.76691
	250	3.53	4.39877	7.26927	0.868772	0.868772	0.754765	1.24611	3.73927	3.73927	13.9822	2.05928
	251	3.69	4.6066	7.76254	0.916596	0.916596	0.840148	1.2484	4.07254	4.07254	16.5855	2.10367
	252	3.77	4.6882	7.55794	0.918201	0.918201	0.843094	1.24355	3.78794	3.78794	14.3485	2.00476
	253	3.36	4.5582	7.16538	1.1982	1.1982	1.43568	1.35661	3.80538	3.80538	14.4809	2.13255
	254	2.82	3.60895	5.79451	0.788955	0.788955	0.62245	1.27977	2.97451	2.97451	8.84774	2.05479
	255	2.88	4.12859	6.36823	1.24859	1.24859	1.55898	1.43354	3.48823	3.48823	12.1677	2.21119
	256	2.87	4.38765	6.78738	1.51765	1.51765	2.30325	1.5288	3.91738	3.91738	15.3458	2.36494
	257	3.61	4.18708	7.31996	0.577083	0.577083	0.333025	1.15986	3.70996	3.70996	13.7638	2.02769
	258	2.73	3.76976	6.64477	1.03976	1.03976	1.0811	1.38086	3.91477	3.91477	15.3254	2.43398
	259	2.89	4.14011	7.09616	1.25011	1.25011	1.56277	1.43256	4.20616	4.20616	17.6918	2.45542
	260	3.49	3.94992	6.76801	0.459919	0.459919	0.211526	1.13178	3.27801	3.27801	10.7454	1.93926
	261	2.73	3.80941	6.64994	1.07941	1.07941	1.16512	1.39539	3.91994	3.91994	15.3659	2.43588
	262	2.68	3.77134	6.11145	1.09134	1.09134	1.19102	1.40722	3.43145	3.43145	11.7749	2.28039
	263	2.57	3.25741	5.36651	0.687415	0.687415	0.472539	1.26748	2.79651	2.79651	7.82049	2.08814
	264	2.32	3.26093	5.21113	0.940926	0.940926	0.885342	1.40557	2.89113	2.89113	8.35863	2.24618
	265	2.43	3.21952	4.97422	0.789524	0.789524	0.623347	1.32491	2.54422	2.54422	6.47308	2.04701
	266	2.88	3.40306	5.25031	0.52306	0.52306	0.273592	1.18162	2.37031	2.37031	5.61835	1.82302
	267	2.84	3.39706	5.39432	0.557063	0.557063	0.310319	1.19615	2.55432	2.55432	6.52456	1.89941
	268	2.22	2.60509	4.34659	0.385088	0.385088	0.148293	1.17346	2.12659	2.12659	4.5224	1.95793
	269	2.23	3.12963	5.62101	0.899626	0.899626	0.809327	1.40342	3.39101	3.39101	11.499	2.52063
	270	2.64	3.24048	5.26947	0.600485	0.600485	0.360582	1.22746	2.62947	2.62947	6.91411	1.99601
	271	2.46	3.10292	4.81646	0.642921	0.642921	0.413347	1.26135	2.35646	2.35646	5.55289	1.95791
	272	2.43	2.82546	4.64134	0.395465	0.395465	0.156392	1.16274	2.21134	2.21134	4.89001	1.91002
	273	2.64	3.06857	4.71902	0.42857	0.42857	0.183672	1.16234	2.07902	2.07902	4.32233	1.78751
	274	2.42	3.43782	5.6065	1.01782	1.01782	1.03595	1.42059	3.1865	3.1865	10.1538	2.31673
	275	2.45	3.69525	5.76917	1.24525	1.24525	1.55064	1.50826	3.31917	3.31917	11.0169	2.35476
	276	2.4	3.20343	5.12339	0.803429	0.803429	0.645498	1.33476	2.72339	2.72339	7.41685	2.13475
	277	2.48	3.15164	5.01153	0.671636	0.671636	0.451094	1.27082	2.53153	2.53153	6.40863	2.02078
	278	2.28	2.82047	4.96148	0.540473	0.540473	0.292111	1.23705	2.68148	2.68148	7.19034	2.17609
	279	2.44	3.15166	5.28031	0.71166	0.71166	0.50646	1.29166	2.84031	2.84031	8.06737	2.16406
	280	2.19	2.90242	4.77967	0.712423	0.712423	0.507547	1.32531	2.58967	2.58967	6.70641	2.1825
	281	2.2	2.98632	4.52968	0.786321	0.786321	0.618301	1.35742	2.32968	2.32968	5.4274	2.05894
	282	2.21	2.89535	4.3534	0.685355	0.685355	0.469711	1.31012	2.1434	2.1434	4.59414	1.96986
	283	2.27	2.77035	4.22089	0.500348	0.500348	0.250348	1.22042	1.95089	1.95089	3.80597	1.85942
	284	2.24	2.75812	4.41575	0.518116	0.518116	0.268444	1.2313	2.17575	2.17575	4.73389	1.97132
	285	2.32	2.77401	4.23799	0.454009	0.454009	0.206124	1.19569	1.91799	1.91799	3.67867	1.82672
	286	2.14	2.64651	3.95569	0.506511	0.506511	0.256553	1.23669	1.81569	1.81569	3.29672	1.84845
	287	2.08	2.42187	3.85312	0.341868	0.341868	0.116874	1.16436	1.77312	1.77312	3.14397	1.85246
	288	2.32	2.58993	4.30593	0.269934	0.269934	0.0728645	1.11635	1.98593	1.98593	3.94391	1.856
	289	2.56	2.66958	4.30529	0.10958	0.10958	0.0120077	1.0428	1.74529	1.74529	3.04602	1.68175
	290	2.77	2.34318	4.00939	-0.426816	0.426816	0.182172	0.845915	1.23939	1.23939	1.5361	1.44743
	291	2.2	2.65078	4.29891	0.450782	0.450782	0.203205	1.2049	2.09891	2.09891	4.40543	1.95405
	292	2.18	2.51755	3.94699	0.337549	0.337549	0.113939	1.15484	1.76699	1.76699	3.12224	1.81054
	293	2.33	2.69628	4.12608	0.36628	0.36628	0.134161	1.1572	1.79608	1.79608	3.22592	1.77085
	294	2.18	2.74166	3.95367	0.561665	0.561665	0.315467	1.25764	1.77367	1.77367	3.14592	1.81361
	295	2.05	2.61159	4.01415	0.561591	0.561591	0.315385	1.27395	1.96415	1.96415	3.8579	1.95812
	296	1.72	2.07434	3.19486	0.354342	0.354342	0.125558	1.20601	1.47486	1.47486	2.17521	1.85748
	297	1.74	1.98085	3.07088	0.240854	0.240854	0.0580109	1.13842	1.33088	1.33088	1.77123	1.76487
	298	1.68	2.58251	3.57568	0.902508	0.902508	0.814521	1.53721	1.89568	1.89568	3.5936	2.12838
	299	1.99	2.81304	4.03693	0.823039	0.823039	0.677393	1.41359	2.04693	2.04693	4.18992	2.02861
	300	1.87	2.07515	3.10092	0.205149	0.205149	0.0420862	1.10971	1.23092	1.23092	1.51517	1.65825
	301	1.54	2.04878	2.76915	0.508776	0.508776	0.258853	1.33037	1.22915	1.22915	1.51082	1.79815
	302	1.61	1.69638	2.36049	0.0863806	0.0863806	0.00746161	1.05365	0.750486	0.750486	0.563229	1.46614
	303	1.48	1.66986	2.37128	0.189859	0.189859	0.0360463	1.12828	0.891285	0.891285	0.794389	1.60222
	304	1.5	1.92955	2.78326	0.42955	0.42955	0.184513	1.28637	1.28326	1.28326	1.64677	1.85551
	305	1.67	2.27671	3.43722	0.606712	0.606712	0.3681	1.3633	1.76722	1.76722	3.12306	2.05821
	306	1.67	2.48059	3.52103	0.810589	0.810589	0.657054	1.48538	1.85103	1.85103	3.42633	2.1084
	307	1.72	2.01132	2.86511	0.291318	0.291318	0.0848661	1.16937	1.14511	1.14511	1.31127	1.66576
	308	1.49	1.61067	2.43788	0.120666	0.120666	0.0145602	1.08098	0.947884	0.947884	0.898483	1.63616
	309	1.44	2.19861	2.93705	0.75861	0.75861	0.575489	1.52681	1.49705	1.49705	2.24116	2.03962
	310	1.36	1.78703	2.61222	0.42703	0.42703	0.182355	1.31399	1.25222	1.25222	1.56806	1.92075
	311	1.68	1.66086	2.56444	-0.0191385	0.0191385	0.00036628	0.988608	0.884439	0.884439	0.782232	1.52645
	312	1.56	2.03605	3.1261	0.476046	0.476046	0.226619	1.30516	1.5661	1.5661	2.45268	2.00391
	313	1.76	2.19073	3.286	0.430734	0.430734	0.185531	1.24473	1.526	1.526	2.32868	1.86705
	314	1.4	2.02805	3.13347	0.628052	0.628052	0.394449	1.44861	1.73347	1.73347	3.00493	2.2382
	315	1.57	1.99894	2.95954	0.428941	0.428941	0.183991	1.27321	1.38954	1.38954	1.93083	1.88506
	316	1.46	2.19724	3.36315	0.737244	0.737244	0.543529	1.50496	1.90315	1.90315	3.62197	2.30353
	317	1.12	2.14677	3.19276	1.02677	1.02677	1.05425	1.91676	2.07276	2.07276	4.29632	2.85067
	318	1.2	2.14281	3.10381	0.942814	0.942814	0.888899	1.78568	1.90381	1.90381	3.62451	2.58651
	319	1.26	1.79135	2.63635	0.531347	0.531347	0.28233	1.4217	1.37635	1.37635	1.89434	2.09234
	320	1.2	1.8763	2.32007	0.676298	0.676298	0.457379	1.56358	1.12007	1.12007	1.25455	1.93339
	321	1.17	1.65355	2.28099	0.483554	0.483554	0.233824	1.41329	1.11099	1.11099	1.23429	1.94956
	322	1.01	1.9043	2.69737	0.8943	0.8943	0.799773	1.88545	1.68737	1.68737	2.84722	2.67066
	323	1.01	2.05471	2.91261	1.04471	1.04471	1.09142	2.03437	1.90261	1.90261	3.61994	2.88377
	324	1.16	1.88832	2.72358	0.728315	0.728315	0.530443	1.62786	1.56358	1.56358	2.44477	2.34791
	325	1.08	1.56345	2.37505	0.483451	0.483451	0.233725	1.44764	1.29505	1.29505	1.67716	2.19912
	326	1.06	1.21281	1.81541	0.152806	0.152806	0.0233497	1.14416	0.75541	0.75541	0.570645	1.71265
	327	1.04	1.70655	2.80738	0.66655	0.66655	0.444289	1.64091	1.76738	1.76738	3.12362	2.6994
	328	0.96	1.9935	3.12268	1.0335	1.0335	1.06812	2.07656	2.16268	2.16268	4.6772	3.2528
	329	0.99	1.48902	2.03607	0.499022	0.499022	0.249023	1.50406	1.04607	1.04607	1.09427	2.05664
	330	1.01	1.45583	1.79447	0.445831	0.445831	0.198765	1.44142	0.78447	0.78447	0.615394	1.7767
	331	0.98	1.72691	2.27581	0.746906	0.746906	0.557869	1.76215	1.29581	1.29581	1.67913	2.32226
	332	0.99	1.65623	2.251	0.666229	0.666229	0.443862	1.67296	1.261	1.261	1.59013	2.27374
	333	1.27	1.64933	2.23611	0.379334	0.379334	0.143894	1.29869	0.966112	0.966112	0.933373	1.76072
	334	0.93	1.68904	1.98189	0.759037	0.759037	0.576137	1.81617	1.05189	1.05189	1.10648	2.13107
	335	1.21	1.72889	2.24715	0.518894	0.518894	0.269251	1.42884	1.03715	1.03715	1.07568	1.85715
	336	1.2	1.77744	2.23525	0.577444	0.577444	0.333441	1.4812	1.03525	1.03525	1.07175	1.86271
	337	1.07	2.0387	2.59698	0.968696	0.968696	0.938373	1.90532	1.52698	1.52698	2.33167	2.42708
	338	0.94	1.71882	2.21907	0.778824	0.778824	0.606567	1.82854	1.27907	1.27907	1.63601	2.36071
	339	1	1.68292	1.97957	0.682924	0.682924	0.466386	1.68292	0.979567	0.979567	0.959552	1.97957
	340	1.13	1.47808	2.03589	0.348084	0.348084	0.121162	1.30804	0.905893	0.905893	0.820643	1.80168
	341	0.75	1.5818	1.99645	0.831799	0.831799	0.69189	2.10907	1.24645	1.24645	1.55365	2.66194
	342	0.66	1.63868	2.20046	0.978678	0.978678	0.957811	2.48285	1.54046	1.54046	2.37301	3.33403
	343	0.61	1.60718	2.08558	0.997183	0.997183	0.994373	2.63473	1.47558	1.47558	2.17735	3.41899
	344	0.68	1.52997	1.60785	0.849973	0.849973	0.722454	2.24996	0.927847	0.927847	0.860901	2.36448
	345	0.67	1.68961	1.81971	1.01961	1.01961	1.0396	2.52181	1.14971	1.14971	1.32184	2.71599
	346	0.75	1.74949	1.8294	0.999493	0.999493	0.998986	2.33266	1.0794	1.0794	1.1651	2.4392
	347	0.77	1.76516	1.77452	0.99516	0.99516	0.990344	2.29242	1.00452	1.00452	1.00905	2.30457
	348	0.91	1.72006	1.89026	0.810056	0.810056	0.65619	1.89017	0.980259	0.980259	0.960907	2.07721
	349	0.71	1.63581	1.91913	0.925808	0.925808	0.857121	2.30396	1.20913	1.20913	1.46198	2.70299
	350	0.85	1.56874	1.70927	0.718744	0.718744	0.516593	1.84558	0.85927	0.85927	0.738346	2.01091
	351	1.04	1.48875	1.18188	0.448752	0.448752	0.201378	1.43149	0.141882	0.141882	0.0201306	1.13643
	352	1.1	1.58971	1.58465	0.489713	0.489713	0.239819	1.44519	0.484649	0.484649	0.234884	1.44059
	353	1.21	1.49821	1.53199	0.288215	0.288215	0.0830676	1.23819	0.32199	0.32199	0.103678	1.26611
	354	0.82	1.34713	1.53693	0.527134	0.527134	0.277871	1.64285	0.716927	0.716927	0.513985	1.8743
	355	0.76	1.54577	1.78211	0.785773	0.785773	0.61744	2.03391	1.02211	1.02211	1.04471	2.34488
	356	0.76	1.49229	1.6823	0.732293	0.732293	0.536253	1.96354	0.922301	0.922301	0.850639	2.21355
	357	0.63	1.29733	1.70344	0.667333	0.667333	0.445334	2.05926	1.07344	1.07344	1.15227	2.70387
	358	0.66	1.26041	1.68077	0.600406	0.600406	0.360487	1.90971	1.02077	1.02077	1.04196	2.54662
	359	0.62	1.1542	1.63893	0.5342	0.5342	0.28537	1.86161	1.01893	1.01893	1.03822	2.64343
	360	0.66	1.35201	1.82134	0.692013	0.692013	0.478882	2.0485	1.16134	1.16134	1.34871	2.75961
	361	0.63	1.69285	2.12438	1.06285	1.06285	1.12965	2.68706	1.49438	1.49438	2.23317	3.37203
	362	0.67	1.5457	1.80919	0.875696	0.875696	0.766844	2.30701	1.13919	1.13919	1.29775	2.70028
	363	0.82	1.52928	1.57532	0.709283	0.709283	0.503083	1.86498	0.755315	0.755315	0.570501	1.92112
	364	0.71	1.54765	1.55707	0.837654	0.837654	0.701665	2.17979	0.847067	0.847067	0.717523	2.19305
	365	0.72	1.42138	1.34778	0.701379	0.701379	0.491932	1.97414	0.627782	0.627782	0.39411	1.87192
	toplam	1094.21	1324.7	2027.36	230.486	234.25	181.434	485.632	933.154	933.622	3149.34	684.123
	Ort.	2.99784	3.6293	5.55442	hs-pm	Mutlak değer (hs-pm)	(hs-pm)2	hs/pm	Turc-pm	Mutlak değer (Turc-pm)	(Turc-pm)2	Turc/pm
						HS-PM	Turc-PM
					RMSE (mm/day)	0.705038	2.9374
					MAE (mm)	0.641782	2.55787
					MR	1.3305	1.87431
					PE (%)	21.0641	85.2811
					R2
						Kilis	Diyarbakır	Mardin	Batman
					RMSE (mm/day)	2.42	3.03	2.22	3.97
					MAE (mm)	1.95	2.38	1.63	3.02
					MR	1.44	1.49	1.25	1.6
					PE (%)	53.04	57.77	39.42	87.77
					R2	0.9816	0.986	0.9933	0.9804

## Sheet: İst.-ETo-Diyarbakır
		2008-2017 Average ETo values
				ETo-TURC (Ousman Couly (2016)
		O	İ		hs-pm	Absolute value (hs-pm)	(hs-pm)2	hs/pm	Turc-pm	Absolute value(Turc-pm)	(Turc-pm)2	Turc/pm
		ETo-PM	ETo-HS
	1	0.62	1.1585	1.05835	0.538499	0.538499	0.289981	1.86855	0.438349	0.438349	0.19215	1.70701
	2	0.66	0.408266	0.464205	-0.251734	0.251734	0.0633702	0.618584	-0.195795	0.195795	0.0383355	0.703342
	3	0.85	0.553006	0.561371	-0.296994	0.296994	0.0882053	0.650596	-0.288629	0.288629	0.0833069	0.660436
	4	0.84	0.419928	0.52169	-0.420072	0.420072	0.17646	0.499915	-0.31831	0.31831	0.101321	0.621059
	5	0.65	0.583841	0.648824	-0.0661589	0.0661589	0.004377	0.898217	-0.00117562	0.00117562	1.38209e-06	0.998191
	6	0.78	1.12584	1.11172	0.345838	0.345838	0.119604	1.44338	0.331724	0.331724	0.110041	1.42529
	7	0.66	0.942338	1.02502	0.282338	0.282338	0.079715	1.42779	0.365017	0.365017	0.133237	1.55306
	8	0.83	1.07968	1.23736	0.249676	0.249676	0.0623382	1.30081	0.407363	0.407363	0.165945	1.4908
	9	0.8	1.07111	1.14463	0.271108	0.271108	0.0734994	1.33888	0.34463	0.34463	0.11877	1.43079
	10	0.92	1.33448	1.33181	0.414482	0.414482	0.171795	1.45052	0.411814	0.411814	0.16959	1.44762
	11	0.82	1.43054	1.31276	0.610542	0.610542	0.372761	1.74456	0.492757	0.492757	0.242809	1.60092
	12	0.78	1.09947	1.0885	0.319467	0.319467	0.102059	1.40957	0.308496	0.308496	0.0951698	1.39551
	13	0.66	1.3999	1.24226	0.739897	0.739897	0.547448	2.12106	0.582264	0.582264	0.339032	1.88222
	14	0.7	0.765862	0.891753	0.0658625	0.0658625	0.00433787	1.09409	0.191753	0.191753	0.0367692	1.27393
	15	0.81	1.12489	1.29676	0.314887	0.314887	0.0991536	1.38875	0.486757	0.486757	0.236932	1.60093
	16	0.9	0.924141	1.05894	0.0241406	0.0241406	0.00058277	1.02682	0.158945	0.158945	0.0252634	1.17661
	17	0.93	1.14659	1.34267	0.216586	0.216586	0.0469094	1.23289	0.412671	0.412671	0.170297	1.44373
	18	0.94	1.22236	1.52649	0.282364	0.282364	0.0797295	1.30039	0.586492	0.586492	0.343972	1.62393
	19	0.77	1.23103	1.50838	0.461028	0.461028	0.212547	1.59874	0.738385	0.738385	0.545212	1.95894
	20	0.83	1.69565	2.08784	0.865652	0.865652	0.749353	2.04295	1.25784	1.25784	1.58215	2.51546
	21	0.91	1.88567	2.16344	0.975665	0.975665	0.951923	2.07216	1.25344	1.25344	1.57111	2.3774
	22	1.21	1.91349	2.1787	0.703487	0.703487	0.494894	1.58139	0.968697	0.968697	0.938374	1.80058
	23	1.03	1.78345	2.03999	0.753449	0.753449	0.567685	1.7315	1.00999	1.00999	1.02009	1.98058
	24	1.16	1.31723	1.68165	0.157225	0.157225	0.0247197	1.13554	0.521647	0.521647	0.272115	1.4497
	25	0.89	1.45594	1.49272	0.56594	0.56594	0.320288	1.63589	0.602724	0.602724	0.363276	1.67722
	26	0.89	1.31618	1.09681	0.426183	0.426183	0.181632	1.47886	0.206811	0.206811	0.0427707	1.23237
	27	0.83	1.08639	1.07251	0.256389	0.256389	0.0657352	1.3089	0.242512	0.242512	0.0588121	1.29218
	28	1	1.85871	1.80499	0.858714	0.858714	0.737389	1.85871	0.804985	0.804985	0.648001	1.80499
	29	1.13	1.43743	1.57226	0.307428	0.307428	0.0945122	1.27206	0.442261	0.442261	0.195595	1.39138
	30	0.99	1.45204	1.41247	0.462044	0.462044	0.213485	1.46671	0.422474	0.422474	0.178484	1.42674
	31	1.09	1.35827	1.20897	0.26827	0.26827	0.0719687	1.24612	0.118972	0.118972	0.0141544	1.10915
	32	1.15	2.21301	2.01229	1.06301	1.06301	1.12999	1.92436	0.862289	0.862289	0.743543	1.74982
	33	1.01	1.7672	1.99393	0.757197	0.757197	0.573347	1.7497	0.98393	0.98393	0.968119	1.97419
	34	1.19	2.17105	2.47435	0.981053	0.981053	0.962465	1.82441	1.28435	1.28435	1.64956	2.07929
	35	1.22	1.82361	2.04595	0.603608	0.603608	0.364343	1.49476	0.825947	0.825947	0.682189	1.67701
	36	1.11	1.76518	2.11615	0.655176	0.655176	0.429255	1.59025	1.00615	1.00615	1.01233	1.90644
	37	1.17	1.60612	1.93073	0.436125	0.436125	0.190205	1.37276	0.760732	0.760732	0.578714	1.6502
	38	1.09	1.43903	1.68858	0.349031	0.349031	0.121823	1.32021	0.598575	0.598575	0.358292	1.54915
	39	1.43	2.14397	2.82535	0.71397	0.71397	0.509753	1.49928	1.39535	1.39535	1.94699	1.97577
	40	1.41	1.70671	2.06599	0.29671	0.29671	0.0880369	1.21043	0.655991	0.655991	0.430325	1.46524
	41	1.34	1.89945	2.31803	0.559448	0.559448	0.312982	1.4175	0.978032	0.978032	0.956547	1.72987
	42	1.53	2.05166	2.44028	0.521658	0.521658	0.272127	1.34095	0.910278	0.910278	0.828606	1.59495
	43	1.24	1.2041	1.53196	-0.0359015	0.0359015	0.00128892	0.971047	0.291956	0.291956	0.0852382	1.23545
	44	1.24	1.56515	2.00467	0.325148	0.325148	0.105721	1.26222	0.764674	0.764674	0.584726	1.61667
	45	1.26	1.50724	2.00007	0.24724	0.24724	0.0611275	1.19622	0.740074	0.740074	0.54771	1.58736
	46	1.4	2.30584	2.46792	0.905845	0.905845	0.820555	1.64703	1.06792	1.06792	1.14046	1.7628
	47	1.44	2.22016	2.42974	0.780156	0.780156	0.608643	1.54177	0.989736	0.989736	0.979578	1.68732
	48	1.55	2.43207	2.62961	0.88207	0.88207	0.778047	1.56908	1.07961	1.07961	1.16555	1.69652
	49	1.73	2.46096	3.00851	0.730965	0.730965	0.53431	1.42252	1.27851	1.27851	1.63459	1.73902
	50	1.78	2.63566	3.27242	0.855664	0.855664	0.732161	1.48071	1.49242	1.49242	2.22731	1.83844
	51	1.59	1.90891	2.15994	0.318913	0.318913	0.101705	1.20057	0.569942	0.569942	0.324833	1.35845
	52	1.75	2.5023	3.08309	0.752297	0.752297	0.565951	1.42988	1.33309	1.33309	1.77714	1.76177
	53	2.01	2.97144	3.79361	0.961443	0.961443	0.924373	1.47833	1.78361	1.78361	3.18125	1.88737
	54	1.89	2.78651	3.56267	0.896506	0.896506	0.803723	1.47434	1.67267	1.67267	2.79782	1.88501
	55	1.84	2.32875	3.23035	0.488749	0.488749	0.238875	1.26562	1.39035	1.39035	1.93306	1.75562
	56	1.91	2.56622	3.25735	0.656217	0.656217	0.43062	1.34357	1.34735	1.34735	1.81535	1.70542
	57	2.11	2.61242	3.58081	0.502419	0.502419	0.252425	1.23811	1.47081	1.47081	2.16327	1.69706
	58	1.96	2.54922	3.47281	0.589225	0.589225	0.347186	1.30062	1.51281	1.51281	2.2886	1.77184
	59	1.85	2.4202	2.96185	0.570196	0.570196	0.325124	1.30821	1.11185	1.11185	1.2362	1.601
	60	1.99	2.55679	3.30915	0.566788	0.566788	0.321248	1.28482	1.31915	1.31915	1.74015	1.66289
	61	1.93	2.65796	3.34809	0.727957	0.727957	0.529922	1.37718	1.41809	1.41809	2.01098	1.73476
	62	1.3	1.23926	1.54546	-0.0607396	0.0607396	0.0036893	0.953277	0.245464	0.245464	0.0602524	1.18882
	63	2.02	2.42603	3.07072	0.406033	0.406033	0.164863	1.20101	1.05072	1.05072	1.10401	1.52016
	64	1.98	2.72976	3.55786	0.749757	0.749757	0.562136	1.37867	1.57786	1.57786	2.48964	1.7969
	65	2.04	2.58046	3.64631	0.540459	0.540459	0.292096	1.26493	1.60631	1.60631	2.58022	1.78741
	66	2.26	2.74121	3.96039	0.481212	0.481212	0.231565	1.21293	1.70039	1.70039	2.89132	1.75238
	67	2.38	3.30342	4.46034	0.923419	0.923419	0.852704	1.38799	2.08034	2.08034	4.32783	1.87409
	68	3.01	3.43711	4.68057	0.427115	0.427115	0.182427	1.1419	1.67057	1.67057	2.7908	1.55501
	69	2.6	2.84848	3.9024	0.248483	0.248483	0.0617439	1.09557	1.3024	1.3024	1.69626	1.50092
	70	2.25	2.14098	2.84957	-0.109017	0.109017	0.0118847	0.951548	0.599565	0.599565	0.359479	1.26647
	71	2.5	2.96539	4.12234	0.465389	0.465389	0.216587	1.18616	1.62234	1.62234	2.63199	1.64894
	72	2.15	2.92253	3.86851	0.772535	0.772535	0.59681	1.35932	1.71851	1.71851	2.95326	1.7993
	73	2.1	2.72068	3.70545	0.620677	0.620677	0.38524	1.29556	1.60545	1.60545	2.57748	1.7645
	74	2.13	2.33536	3.27866	0.205361	0.205361	0.0421733	1.09641	1.14866	1.14866	1.31943	1.53928
	75	2.46	2.96134	4.15373	0.501343	0.501343	0.251345	1.2038	1.69373	1.69373	2.86872	1.68851
	76	2.11	2.24253	3.32871	0.132532	0.132532	0.0175648	1.06281	1.21871	1.21871	1.48525	1.57759
	77	2.46	2.97169	3.87734	0.511694	0.511694	0.261831	1.20801	1.41734	1.41734	2.00885	1.57615
	78	2.85	3.63117	4.71704	0.781167	0.781167	0.610221	1.27409	1.86704	1.86704	3.48585	1.6551
	79	2.72	3.28528	4.70076	0.565282	0.565282	0.319544	1.20782	1.98076	1.98076	3.92339	1.72822
	80	2.98	3.71532	5.29923	0.735324	0.735324	0.540701	1.24675	2.31923	2.31923	5.37881	1.77826
	81	2.81	2.48898	3.66787	-0.321023	0.321023	0.103056	0.885757	0.857868	0.857868	0.735938	1.30529
	82	2.97	3.13533	4.73499	0.165333	0.165333	0.0273349	1.05567	1.76499	1.76499	3.1152	1.59427
	83	3.44	3.85566	5.49289	0.415661	0.415661	0.172774	1.12083	2.05289	2.05289	4.21434	1.59677
	84	3.24	3.86798	5.82594	0.627978	0.627978	0.394356	1.19382	2.58594	2.58594	6.68707	1.79813
	85	3.21	3.94496	5.92243	0.734956	0.734956	0.54016	1.22896	2.71243	2.71243	7.35726	1.84499
	86	3.03	3.73701	5.49481	0.707013	0.707013	0.499868	1.23334	2.46481	2.46481	6.07531	1.81347
	87	2.88	3.678	5.42666	0.798004	0.798004	0.636811	1.27708	2.54666	2.54666	6.48547	1.88426
	88	3.2	4.15768	5.8018	0.957677	0.957677	0.917146	1.29927	2.6018	2.6018	6.76936	1.81306
	89	2.96	3.42238	4.93133	0.462381	0.462381	0.213797	1.15621	1.97133	1.97133	3.88614	1.66599
	90	2.88	3.05761	4.58427	0.177607	0.177607	0.0315442	1.06167	1.70427	1.70427	2.90453	1.59176
	91	3.14	3.4447	4.96341	0.304697	0.304697	0.0928401	1.09704	1.82341	1.82341	3.32482	1.5807
	92	3.61	4.3678	6.29621	0.757797	0.757797	0.574257	1.20992	2.68621	2.68621	7.21571	1.7441
	93	3.98	4.67708	7.02856	0.697076	0.697076	0.485916	1.17514	3.04856	3.04856	9.2937	1.76597
	94	4.02	4.95962	7.39634	0.939619	0.939619	0.882883	1.23374	3.37634	3.37634	11.3997	1.83988
	95	3.89	5.19217	7.83099	1.30217	1.30217	1.69565	1.33475	3.94099	3.94099	15.5314	2.01311
	96	3.91	5.11024	7.86796	1.20024	1.20024	1.44057	1.30697	3.95796	3.95796	15.6655	2.01227
	97	3.95	5.23322	7.9035	1.28322	1.28322	1.64664	1.32486	3.9535	3.9535	15.6302	2.00089
	98	3.36	3.53574	5.35596	0.175737	0.175737	0.0308836	1.0523	1.99596	1.99596	3.98384	1.59403
	99	3.47	4.23644	6.18171	0.766437	0.766437	0.587425	1.22088	2.71171	2.71171	7.35335	1.78147
	100	3.88	5.2207	7.56067	1.3407	1.3407	1.79749	1.34554	3.68067	3.68067	13.5473	1.94863
	101	3.7	4.66742	6.52216	0.967419	0.967419	0.9359	1.26146	2.82216	2.82216	7.96457	1.76275
	102	3.49	4.16797	5.85696	0.677969	0.677969	0.459642	1.19426	2.36696	2.36696	5.60251	1.67821
	103	3.18	3.59131	4.962	0.411311	0.411311	0.169177	1.12934	1.782	1.782	3.17554	1.56038
	104	3.66	4.26151	6.38743	0.601512	0.601512	0.361817	1.16435	2.72743	2.72743	7.4389	1.7452
	105	3.87	4.28542	6.20976	0.415421	0.415421	0.172574	1.10734	2.33976	2.33976	5.47446	1.60459
	106	3.98	4.61898	6.60701	0.638979	0.638979	0.408294	1.16055	2.62701	2.62701	6.90119	1.66005
	107	4.12	5.06624	7.10345	0.946236	0.946236	0.895363	1.22967	2.98345	2.98345	8.90099	1.72414
	108	3.95	5.01673	7.28117	1.06673	1.06673	1.13791	1.27006	3.33117	3.33117	11.0967	1.84333
	109	4.67	5.7663	8.62004	1.0963	1.0963	1.20188	1.23475	3.95004	3.95004	15.6028	1.84583
	110	4.48	5.63724	8.03345	1.15724	1.15724	1.3392	1.25831	3.55345	3.55345	12.627	1.79318
	111	4.12	5.12219	7.77237	1.00219	1.00219	1.00439	1.24325	3.65237	3.65237	13.3398	1.8865
	112	4.26	5.59376	8.24565	1.33376	1.33376	1.7789	1.31309	3.98565	3.98565	15.8854	1.9356
	113	4.46	5.62354	8.34333	1.16354	1.16354	1.35382	1.26088	3.88333	3.88333	15.0802	1.8707
	114	4.49	5.65042	9.20753	1.16042	1.16042	1.34658	1.25845	4.71753	4.71753	22.2551	2.05067
	115	4.69	5.88938	9.47093	1.19938	1.19938	1.4385	1.25573	4.78093	4.78093	22.8573	2.01939
	116	4.89	5.98669	9.45126	1.09669	1.09669	1.20273	1.22427	4.56126	4.56126	20.8051	1.93277
	117	4.35	5.24854	8.06736	0.898543	0.898543	0.807379	1.20656	3.71736	3.71736	13.8187	1.85456
	118	4.18	4.23427	6.30899	0.0542657	0.0542657	0.00294476	1.01298	2.12899	2.12899	4.53261	1.50933
	119	4.69	5.94733	9.1156	1.25733	1.25733	1.58089	1.26809	4.4256	4.4256	19.586	1.94363
	120	4.61	5.54146	8.25436	0.931456	0.931456	0.867609	1.20205	3.64436	3.64436	13.2814	1.79053
	121	4.3	4.82975	7.16486	0.529747	0.529747	0.280632	1.1232	2.86486	2.86486	8.2074	1.66625
	122	4.1	4.45813	6.83042	0.358129	0.358129	0.128257	1.08735	2.73042	2.73042	7.4552	1.66596
	123	4.65	4.82471	7.65039	0.174715	0.174715	0.0305252	1.03757	3.00039	3.00039	9.00231	1.64524
	124	4.76	5.27636	7.69512	0.516362	0.516362	0.266629	1.10848	2.93512	2.93512	8.61493	1.61662
	125	5.08	5.22144	7.95136	0.141444	0.141444	0.0200065	1.02784	2.87136	2.87136	8.24468	1.56523
	126	4.95	6.00066	8.75569	1.05066	1.05066	1.10388	1.21225	3.80569	3.80569	14.4833	1.76883
	127	4.61	5.79977	8.49609	1.18977	1.18977	1.41555	1.25808	3.88609	3.88609	15.1017	1.84297
	128	4.76	5.94152	9.23449	1.18152	1.18152	1.39599	1.24822	4.47449	4.47449	20.0211	1.94002
	129	4.6	4.96704	7.1816	0.367045	0.367045	0.134722	1.07979	2.5816	2.5816	6.66463	1.56122
	130	5.08	6.32424	9.77038	1.24424	1.24424	1.54813	1.24493	4.69038	4.69038	21.9996	1.9233
	131	5.11	6.61661	9.66346	1.50661	1.50661	2.26989	1.29484	4.55346	4.55346	20.734	1.89109
	132	5.11	6.45261	9.24978	1.34261	1.34261	1.80259	1.26274	4.13978	4.13978	17.1378	1.81013
	133	5.29	6.3383	9.1517	1.0483	1.0483	1.09894	1.19817	3.8617	3.8617	14.9127	1.73
	134	5.16	6.35356	9.28573	1.19356	1.19356	1.4246	1.23131	4.12573	4.12573	17.0217	1.79956
	135	5.29	6.60982	10.4836	1.31982	1.31982	1.74191	1.24949	5.19365	5.19365	26.974	1.98179
	136	5.47	6.43452	9.37448	0.964516	0.964516	0.930292	1.17633	3.90448	3.90448	15.245	1.7138
	137	5.39	7.01502	10.5015	1.62502	1.62502	2.64069	1.30149	5.11148	5.11148	26.1273	1.94833
	138	5.36	6.34306	9.46391	0.983062	0.983062	0.966411	1.18341	4.10391	4.10391	16.842	1.76565
	139	5.24	6.06618	9.11314	0.826184	0.826184	0.68258	1.15767	3.87314	3.87314	15.0012	1.73915
	140	4.55	4.93832	7.28355	0.38832	0.38832	0.150793	1.08535	2.73355	2.73355	7.47231	1.60078
	141	5.4	6.6595	9.58374	1.2595	1.2595	1.58635	1.23324	4.18374	4.18374	17.5037	1.77477
	142	5.14	5.95468	9.05349	0.814682	0.814682	0.663707	1.1585	3.91349	3.91349	15.3154	1.76138
	143	5.03	5.84796	9.2516	0.81796	0.81796	0.669058	1.16262	4.2216	4.2216	17.8219	1.83929
	144	5.52	6.56235	9.41169	1.04235	1.04235	1.08649	1.18883	3.89169	3.89169	15.1452	1.70502
	145	5.62	6.53749	10.2101	0.917493	0.917493	0.841794	1.16326	4.59013	4.59013	21.0693	1.81675
	146	5.5	6.59608	9.9373	1.09608	1.09608	1.2014	1.19929	4.4373	4.4373	19.6896	1.80678
	147	5.81	6.76168	10.0416	0.951685	0.951685	0.905704	1.1638	4.2316	4.2316	17.9064	1.72833
	148	5.76	6.80006	9.77169	1.04006	1.04006	1.08173	1.18057	4.01169	4.01169	16.0936	1.69647
	149	6.34	7.24919	10.5646	0.909187	0.909187	0.826621	1.1434	4.22457	4.22457	17.847	1.66634
	150	6.14	7.34597	11.5748	1.20597	1.20597	1.45437	1.19641	5.43482	5.43482	29.5373	1.88515
	151	6.21	7.52662	11.7324	1.31662	1.31662	1.73348	1.21202	5.5224	5.5224	30.4969	1.88928
	152	6.13	7.55948	11.7511	1.42948	1.42948	2.0434	1.23319	5.62109	5.62109	31.5966	1.91698
	153	5.95	7.37864	10.5665	1.42864	1.42864	2.04101	1.24011	4.61652	4.61652	21.3123	1.77589
	154	6.04	7.622	11.8648	1.582	1.582	2.50274	1.26192	5.8248	5.8248	33.9283	1.96437
	155	6.03	7.53392	11.7162	1.50392	1.50392	2.26178	1.24941	5.68616	5.68616	32.3325	1.94298
	156	6.1	7.56655	12.5606	1.46655	1.46655	2.15076	1.24042	6.4606	6.4606	41.7393	2.05911
	157	6.62	7.37241	12.3714	0.75241	0.75241	0.566121	1.11366	5.75136	5.75136	33.0782	1.86879
	158	5.78	7.45789	11.9615	1.67789	1.67789	2.8153	1.29029	6.18149	6.18149	38.2108	2.06946
	159	5.62	7.41275	11.4018	1.79275	1.79275	3.21394	1.31899	5.78183	5.78183	33.4296	2.0288
	160	5.72	7.46082	11.9787	1.74082	1.74082	3.03045	1.30434	6.25865	6.25865	39.1707	2.09417
	161	6.09	7.61613	11.7787	1.52613	1.52613	2.32906	1.2506	5.68869	5.68869	32.3612	1.9341
	162	6.26	7.12264	11.3063	0.862637	0.862637	0.744143	1.1378	5.04627	5.04627	25.4649	1.80611
	163	6.94	7.2759	11.641	0.335902	0.335902	0.11283	1.0484	4.70098	4.70098	22.0993	1.67738
	164	6.52	7.1633	11.7512	0.643295	0.643295	0.413829	1.09866	5.23123	5.23123	27.3658	1.80234
	165	5.82	6.68287	10.5803	0.862867	0.862867	0.744539	1.14826	4.76026	4.76026	22.6601	1.81791
	166	6.02	7.56544	12.9219	1.54544	1.54544	2.38839	1.25672	6.90186	6.90186	47.6357	2.14649
	167	6.61	7.80321	13.4219	1.19321	1.19321	1.42375	1.18052	6.81185	6.81185	46.4013	2.03054
	168	6.67	7.33178	12.4918	0.661784	0.661784	0.437958	1.09922	5.82177	5.82177	33.8931	1.87283
	169	6.75	7.51789	12.7892	0.767895	0.767895	0.589662	1.11376	6.03921	6.03921	36.472	1.8947
	170	7.46	7.29198	12.4099	-0.16802	0.16802	0.0282307	0.977477	4.94993	4.94993	24.5018	1.66353
	171	7.1	7.52747	12.6588	0.427474	0.427474	0.182734	1.06021	5.5588	5.5588	30.9002	1.78293
	172	6.58	7.00219	12.2697	0.422187	0.422187	0.178242	1.06416	5.68973	5.68973	32.373	1.8647
	173	7.23	7.89359	14.3005	0.663587	0.663587	0.440347	1.09178	7.07054	7.07054	49.9926	1.97795
	174	6.5	7.83997	13.3843	1.33997	1.33997	1.79553	1.20615	6.88433	6.88433	47.394	2.05913
	175	5.81	7.41912	13.3911	1.60912	1.60912	2.58928	1.27696	7.58112	7.58112	57.4734	2.30484
	176	6.45	7.70457	13.3413	1.25457	1.25457	1.57395	1.19451	6.89128	6.89128	47.4897	2.06842
	177	7.38	7.84471	13.6058	0.464711	0.464711	0.215956	1.06297	6.22579	6.22579	38.7605	1.8436
	178	7.09	7.90662	13.9138	0.816616	0.816616	0.666862	1.11518	6.8238	6.8238	46.5643	1.96245
	179	6.85	7.95054	14.5923	1.10054	1.10054	1.21119	1.16066	7.74231	7.74231	59.9433	2.13026
	180	6.81	7.79763	14.0227	0.987633	0.987633	0.975419	1.14503	7.21273	7.21273	52.0234	2.05914
	181	6.84	7.86614	14.0469	1.02614	1.02614	1.05296	1.15002	7.20687	7.20687	51.939	2.05364
	182	7.02	7.93549	14.4656	0.915491	0.915491	0.838124	1.13041	7.44564	7.44564	55.4375	2.06063
	183	6.93	7.67844	13.2243	0.748441	0.748441	0.560164	1.108	6.29427	6.29427	39.6178	1.90826
	184	7.28	7.96853	12.8467	0.688526	0.688526	0.474069	1.09458	5.56671	5.56671	30.9883	1.76466
	185	7.51	7.90487	13.0455	0.394871	0.394871	0.155923	1.05258	5.53553	5.53553	30.6421	1.73709
	186	6.97	7.49389	12.7587	0.523893	0.523893	0.274463	1.07516	5.78872	5.78872	33.5092	1.83052
	187	7.16	7.78713	13.1489	0.627128	0.627128	0.393289	1.08759	5.98892	5.98892	35.8671	1.83644
	188	6.73	8.09779	13.0665	1.36779	1.36779	1.87086	1.20324	6.33645	6.33645	40.1506	1.94152
	189	6.3	7.90231	14.269	1.60231	1.60231	2.5674	1.25433	7.96896	7.96896	63.5044	2.26491
	190	6.86	7.56909	14.8898	0.709088	0.709088	0.502806	1.10337	8.0298	8.0298	64.4777	2.17053
	191	7.49	7.97664	14.2284	0.486638	0.486638	0.236816	1.06497	6.73835	6.73835	45.4054	1.89965
	192	7.17	8.06053	13.304	0.890532	0.890532	0.793046	1.1242	6.13398	6.13398	37.6257	1.85551
	193	6.91	8.10626	13.7043	1.19626	1.19626	1.43104	1.17312	6.79426	6.79426	46.162	1.98325
	194	6.72	8.03657	13.9924	1.31657	1.31657	1.73334	1.19592	7.27244	7.27244	52.8883	2.08221
	195	6.59	7.86035	12.8362	1.27035	1.27035	1.61378	1.19277	6.24621	6.24621	39.0151	1.94783
	196	6.77	7.62824	12.6797	0.858236	0.858236	0.736569	1.12677	5.90973	5.90973	34.9249	1.87293
	197	6.4	7.83958	13.8475	1.43958	1.43958	2.07238	1.22493	7.44746	7.44746	55.4646	2.16367
	198	6.23	7.77266	13.7174	1.54266	1.54266	2.37979	1.24762	7.48744	7.48744	56.0618	2.20184
	199	6.2	7.59163	13.7563	1.39163	1.39163	1.93665	1.22446	7.55628	7.55628	57.0974	2.21876
	200	6.35	7.62203	14.5468	1.27203	1.27203	1.61806	1.20032	8.19681	8.19681	67.1877	2.29084
	201	6.51	7.60972	13.5803	1.09972	1.09972	1.20939	1.16893	7.07033	7.07033	49.9895	2.08607
	202	6.22	7.3301	12.4936	1.1101	1.1101	1.23233	1.17847	6.2736	6.2736	39.3581	2.00862
	203	6.18	6.83596	11.633	0.655956	0.655956	0.430278	1.10614	5.45296	5.45296	29.7348	1.88236
	204	6.72	7.3856	12.9157	0.665602	0.665602	0.443026	1.09905	6.19574	6.19574	38.3872	1.92199
	205	7.12	7.32745	13.0689	0.207445	0.207445	0.0430335	1.02914	5.94888	5.94888	35.3892	1.83552
	206	6.5	7.37996	12.6653	0.879958	0.879958	0.774326	1.13538	6.1653	6.1653	38.0109	1.94851
	207	6.33	7.18041	13.468	0.850408	0.850408	0.723193	1.13435	7.13796	7.13796	50.9505	2.12764
	208	6.44	7.28558	12.6577	0.845579	0.845579	0.715003	1.1313	6.21766	6.21766	38.6593	1.96548
	209	6.27	7.33215	13.1116	1.06215	1.06215	1.12816	1.1694	6.84163	6.84163	46.8079	2.09117
	210	6.4	7.20539	13.0251	0.805385	0.805385	0.648645	1.12584	6.62511	6.62511	43.8921	2.03517
	211	6.28	7.19093	11.8404	0.910928	0.910928	0.829789	1.14505	5.56036	5.56036	30.9176	1.88541
	212	6.05	7.2553	12.4427	1.2053	1.2053	1.45274	1.19922	6.39273	6.39273	40.867	2.05665
	213	5.92	6.18661	11.8623	0.266612	0.266612	0.0710819	1.04504	5.94232	5.94232	35.3112	2.00377
	214	5.99	6.56661	10.5838	0.576612	0.576612	0.332481	1.09626	4.59382	4.59382	21.1032	1.76691
	215	5.96	7.01598	12.1014	1.05598	1.05598	1.1151	1.17718	6.14144	6.14144	37.7173	2.03044
	216	5.7	7.02659	12.2605	1.32659	1.32659	1.75985	1.23274	6.56045	6.56045	43.0396	2.15096
	217	5.71	7.06121	11.9875	1.35121	1.35121	1.82576	1.23664	6.2775	6.2775	39.4069	2.09939
	218	6.01	7.05138	11.7167	1.04138	1.04138	1.08448	1.17328	5.70675	5.70675	32.567	1.94954
	219	6.65	6.93942	10.9658	0.289425	0.289425	0.0837668	1.04352	4.31575	4.31575	18.6257	1.64899
	220	6.57	6.67497	11.0023	0.104965	0.104965	0.0110177	1.01598	4.43228	4.43228	19.6451	1.67462
	221	6.42	6.41612	11.1325	-0.00388088	0.00388088	1.50612e-05	0.999396	4.71247	4.71247	22.2073	1.73403
	222	5.99	6.80525	11.2257	0.815253	0.815253	0.664638	1.1361	5.23571	5.23571	27.4127	1.87408
	223	6.46	6.69941	11.4634	0.239407	0.239407	0.0573156	1.03706	5.0034	5.0034	25.034	1.77452
	224	5.53	6.50355	11.2765	0.973547	0.973547	0.947793	1.17605	5.74645	5.74645	33.0217	2.03914
	225	4.4	5.18267	8.90413	0.782673	0.782673	0.612577	1.17788	4.50413	4.50413	20.2872	2.02367
	226	5.59	6.32712	10.4937	0.73712	0.73712	0.543346	1.13186	4.9037	4.9037	24.0463	1.87723
	227	5.42	6.24583	10.5742	0.825832	0.825832	0.681998	1.15237	5.15424	5.15424	26.5662	1.95097
	228	5.16	6.10902	10.0146	0.949025	0.949025	0.900648	1.18392	4.8546	4.8546	23.5672	1.94081
	229	5.48	6.23448	10.0144	0.754483	0.754483	0.569244	1.13768	4.53438	4.53438	20.5606	1.82744
	230	4.97	5.03758	8.78715	0.067576	0.067576	0.00456652	1.0136	3.81715	3.81715	14.5706	1.76804
	231	4.54	5.4956	9.14687	0.955605	0.955605	0.91318	1.21049	4.60687	4.60687	21.2233	2.01473
	232	5.09	5.79878	9.09985	0.708777	0.708777	0.502365	1.13925	4.00985	4.00985	16.0789	1.78779
	233	5.24	5.4501	8.83701	0.210105	0.210105	0.0441441	1.0401	3.59701	3.59701	12.9385	1.68645
	234	5.17	5.40744	8.30328	0.237443	0.237443	0.0563792	1.04593	3.13328	3.13328	9.81743	1.60605
	235	4.71	5.51163	8.63095	0.801635	0.801635	0.642618	1.1702	3.92095	3.92095	15.3739	1.83247
	236	4.85	4.97814	8.05938	0.128137	0.128137	0.0164192	1.02642	3.20938	3.20938	10.3001	1.66173
	237	4.82	5.06707	7.9923	0.24707	0.24707	0.0610436	1.05126	3.1723	3.1723	10.0635	1.65815
	238	4.71	5.12365	8.08839	0.413652	0.413652	0.171108	1.08782	3.37839	3.37839	11.4135	1.71728
	239	4.48	4.40541	7.31474	-0.0745935	0.0745935	0.00556419	0.98335	2.83474	2.83474	8.03577	1.63276
	240	4.66	4.9648	7.8402	0.304801	0.304801	0.0929038	1.06541	3.1802	3.1802	10.1136	1.68245
	241	5.06	5.10872	9.48091	0.0487216	0.0487216	0.00237379	1.00963	4.42091	4.42091	19.5444	1.8737
	242	4.69	4.79984	8.36983	0.109836	0.109836	0.0120639	1.02342	3.67983	3.67983	13.5412	1.78461
	243	4.72	5.41844	8.9302	0.698444	0.698444	0.487824	1.14798	4.2102	4.2102	17.7258	1.89199
	244	4.36	5.06418	8.57541	0.704176	0.704176	0.495864	1.16151	4.21541	4.21541	17.7697	1.96684
	245	4.62	4.90688	8.76867	0.286885	0.286885	0.0823027	1.0621	4.14867	4.14867	17.2115	1.89798
	246	4.86	5.24384	9.04668	0.383841	0.383841	0.147334	1.07898	4.18668	4.18668	17.5283	1.86146
	247	4.69	5.12023	8.79224	0.43023	0.43023	0.185098	1.09173	4.10224	4.10224	16.8284	1.87468
	248	4.58	4.39608	7.38922	-0.183916	0.183916	0.0338253	0.959844	2.80922	2.80922	7.89172	1.61337
	249	3.94	4.45537	7.20734	0.515367	0.515367	0.265603	1.1308	3.26734	3.26734	10.6755	1.82927
	250	4.46	5.87589	10.1243	1.41589	1.41589	2.00476	1.31747	5.6643	5.6643	32.0843	2.27002
	251	4.43	5.72885	10.0591	1.29885	1.29885	1.68702	1.29319	5.62906	5.62906	31.6864	2.27067
	252	4.18	5.47511	9.7509	1.29511	1.29511	1.67732	1.30984	5.5709	5.5709	31.0349	2.33275
	253	4.21	5.38473	9.07042	1.17473	1.17473	1.38	1.27903	4.86042	4.86042	23.6237	2.15449
	254	4.24	4.09717	6.92194	-0.142833	0.142833	0.0204011	0.966313	2.68194	2.68194	7.19283	1.63253
	255	3.8	4.4873	7.61088	0.687302	0.687302	0.472384	1.18087	3.81088	3.81088	14.5228	2.00286
	256	4.25	4.88373	8.0801	0.633735	0.633735	0.40162	1.14911	3.8301	3.8301	14.6697	1.9012
	257	3.7	4.42575	8.55438	0.725751	0.725751	0.526714	1.19615	4.85438	4.85438	23.565	2.312
	258	3.32	3.66012	7.03561	0.340119	0.340119	0.115681	1.10245	3.71561	3.71561	13.8058	2.11916
	259	3.4	4.44113	8.97249	1.04113	1.04113	1.08394	1.30621	5.57249	5.57249	31.0527	2.63897
	260	3.67	4.12537	7.91541	0.455366	0.455366	0.207358	1.12408	4.24541	4.24541	18.0235	2.15679
	261	3.39	4.13181	8.73577	0.741806	0.741806	0.550276	1.21882	5.34577	5.34577	28.5773	2.57692
	262	3.94	4.46316	8.55937	0.523165	0.523165	0.273701	1.13278	4.61937	4.61937	21.3386	2.17243
	263	3.6	3.84061	7.54478	0.240606	0.240606	0.0578913	1.06684	3.94478	3.94478	15.5613	2.09577
	264	3.31	3.56143	6.57715	0.251434	0.251434	0.0632189	1.07596	3.26715	3.26715	10.6743	1.98706
	265	3.58	4.32391	7.50695	0.743911	0.743911	0.553404	1.2078	3.92695	3.92695	15.4209	2.09691
	266	3.47	3.90718	6.54322	0.437179	0.437179	0.191125	1.12599	3.07322	3.07322	9.4447	1.88566
	267	3.58	3.95329	6.89341	0.373292	0.373292	0.139347	1.10427	3.31341	3.31341	10.9787	1.92553
	268	3.02	3.27079	5.92946	0.25079	0.25079	0.0628955	1.08304	2.90946	2.90946	8.46494	1.9634
	269	3.25	3.66247	6.62353	0.412469	0.412469	0.17013	1.12691	3.37353	3.37353	11.3807	2.03801
	270	3.31	4.00327	7.46437	0.693268	0.693268	0.48062	1.20945	4.15437	4.15437	17.2588	2.2551
	271	3.39	3.83397	7.20857	0.44397	0.44397	0.197109	1.13096	3.81857	3.81857	14.5815	2.12642
	272	2.94	3.31958	6.55741	0.379582	0.379582	0.144082	1.12911	3.61741	3.61741	13.0857	2.23041
	273	2.92	3.27258	5.82834	0.352577	0.352577	0.12431	1.12075	2.90834	2.90834	8.45846	1.99601
	274	3.1	4.40644	7.03644	1.30644	1.30644	1.70679	1.42143	3.93644	3.93644	15.4956	2.26982
	275	2.86	4.17773	6.71446	1.31773	1.31773	1.73642	1.46075	3.85446	3.85446	14.8569	2.34771
	276	3	3.78502	6.3289	0.785018	0.785018	0.616253	1.26167	3.3289	3.3289	11.0816	2.10963
	277	2.99	3.64744	5.88764	0.657443	0.657443	0.432231	1.21988	2.89764	2.89764	8.39629	1.96911
	278	2.56	3.29614	5.53925	0.736138	0.736138	0.5419	1.28755	2.97925	2.97925	8.87595	2.16377
	279	2.6	3.45389	5.71722	0.853888	0.853888	0.729125	1.32842	3.11722	3.11722	9.71708	2.19893
	280	2.6	3.46592	5.79978	0.865917	0.865917	0.749813	1.33305	3.19978	3.19978	10.2386	2.23068
	281	2.5	3.02874	5.10729	0.528739	0.528739	0.279565	1.2115	2.60729	2.60729	6.79796	2.04292
	282	2.27	2.70398	4.67033	0.433981	0.433981	0.18834	1.19118	2.40033	2.40033	5.76159	2.05741
	283	2.52	3.37279	5.6948	0.852794	0.852794	0.727258	1.33841	3.1748	3.1748	10.0793	2.25984
	284	2.34	2.98809	5.08318	0.648086	0.648086	0.420015	1.27696	2.74318	2.74318	7.52506	2.1723
	285	2.61	3.33858	5.60285	0.728578	0.728578	0.530826	1.27915	2.99285	2.99285	8.95717	2.14669
	286	2.24	3.30129	5.4433	1.06129	1.06129	1.12633	1.47379	3.2033	3.2033	10.2611	2.43005
	287	2.07	2.69568	4.67783	0.62568	0.62568	0.391476	1.30226	2.60783	2.60783	6.80076	2.25982
	288	2.36	2.76208	4.75597	0.402085	0.402085	0.161672	1.17037	2.39597	2.39597	5.74068	2.01524
	289	2.59	3.27246	4.465	0.682461	0.682461	0.465753	1.2635	1.875	1.875	3.51564	1.72394
	290	2.78	3.16226	5.70752	0.382264	0.382264	0.146126	1.13751	2.92752	2.92752	8.57035	2.05306
	291	2.39	3.41935	5.71035	1.02935	1.02935	1.05956	1.43069	3.32035	3.32035	11.0247	2.38927
	292	2.03	2.61465	4.40874	0.58465	0.58465	0.341815	1.288	2.37874	2.37874	5.65842	2.1718
	293	2.79	2.91663	4.51331	0.126629	0.126629	0.0160348	1.04539	1.72331	1.72331	2.96978	1.61767
	294	2.07	2.8728	4.5361	0.802799	0.802799	0.644486	1.38783	2.4661	2.4661	6.08163	2.19135
	295	2.1	3.03129	4.72786	0.93129	0.93129	0.867302	1.44347	2.62786	2.62786	6.90563	2.25136
	296	1.9	2.352	3.86424	0.451999	0.451999	0.204303	1.23789	1.96424	1.96424	3.85824	2.03381
	297	1.76	2.25374	3.29919	0.493739	0.493739	0.243778	1.28053	1.53919	1.53919	2.36911	1.87454
	298	1.93	3.10318	4.41951	1.17318	1.17318	1.37636	1.60787	2.48951	2.48951	6.19765	2.2899
	299	2.12	3.39193	4.89948	1.27193	1.27193	1.6178	1.59997	2.77948	2.77948	7.72551	2.31108
	300	1.92	2.93167	4.3128	1.01167	1.01167	1.02348	1.52691	2.3928	2.3928	5.72548	2.24625
	301	1.6	2.01475	2.88057	0.41475	0.41475	0.172018	1.25922	1.28057	1.28057	1.63987	1.80036
	302	1.61	1.39759	2.18398	-0.212414	0.212414	0.0451196	0.868066	0.573979	0.573979	0.329452	1.35651
	303	1.7	2.06323	3.09859	0.363228	0.363228	0.131935	1.21366	1.39859	1.39859	1.95606	1.8227
	304	1.55	1.9598	2.93518	0.409797	0.409797	0.167934	1.26439	1.38518	1.38518	1.91874	1.89367
	305	1.55	2.07969	3.33624	0.529693	0.529693	0.280575	1.34174	1.78624	1.78624	3.19064	2.15241
	306	1.49	1.99672	3.09261	0.506725	0.506725	0.25677	1.34008	1.60261	1.60261	2.56837	2.07558
	307	1.4	1.75772	2.59912	0.357722	0.357722	0.127965	1.25552	1.19912	1.19912	1.43789	1.85652
	308	1.67	1.83764	2.9129	0.167636	0.167636	0.0281019	1.10038	1.2429	1.2429	1.54481	1.74425
	309	1.48	1.75042	2.61503	0.270421	0.270421	0.0731276	1.18272	1.13503	1.13503	1.2883	1.76691
	310	1.63	2.23201	3.36048	0.602009	0.602009	0.362415	1.36933	1.73048	1.73048	2.99455	2.06164
	311	1.62	1.87002	2.8838	0.250022	0.250022	0.0625109	1.15433	1.2638	1.2638	1.59718	1.78012
	312	1.48	1.99179	3.0438	0.511789	0.511789	0.261928	1.3458	1.5638	1.5638	2.44548	2.05662
	313	1.39	2.33183	3.29738	0.941834	0.941834	0.887052	1.67758	1.90738	1.90738	3.6381	2.37222
	314	1.49	2.12457	2.99712	0.634575	0.634575	0.402685	1.42589	1.50712	1.50712	2.27142	2.01149
	315	1.47	2.39796	3.43867	0.927963	0.927963	0.861116	1.63127	1.96867	1.96867	3.87565	2.33923
	316	1.42	2.11376	3.13257	0.693764	0.693764	0.481308	1.48857	1.71257	1.71257	2.93291	2.20604
	317	1.22	1.68073	2.6615	0.460726	0.460726	0.212268	1.37764	1.4415	1.4415	2.07792	2.18156
	318	1.25	1.94925	2.957	0.699254	0.699254	0.488957	1.5594	1.707	1.707	2.91384	2.3656
	319	1.33	2.14568	3.12135	0.815676	0.815676	0.665327	1.61329	1.79135	1.79135	3.20892	2.34688
	320	1.19	1.51348	2.23013	0.323482	0.323482	0.104641	1.27183	1.04013	1.04013	1.08186	1.87405
	321	1.05	1.53053	2.20879	0.480534	0.480534	0.230913	1.45765	1.15879	1.15879	1.3428	2.10361
	322	1.2	2.37142	3.15364	1.17142	1.17142	1.37223	1.97619	1.95364	1.95364	3.81673	2.62804
	323	1.19	2.03662	2.73007	0.846618	0.846618	0.716762	1.71144	1.54007	1.54007	2.37182	2.29418
	324	1.13	1.69403	2.36911	0.564025	0.564025	0.318125	1.49914	1.23911	1.23911	1.53538	2.09655
	325	1.32	2.00516	2.74511	0.68516	0.68516	0.469444	1.51906	1.42511	1.42511	2.03094	2.07963
	326	1.21	1.52625	2.26149	0.316254	0.316254	0.100016	1.26137	1.05149	1.05149	1.10563	1.869
	327	0.99	1.20352	2.05972	0.213521	0.213521	0.0455911	1.21568	1.06972	1.06972	1.14429	2.08052
	328	1.03	1.71935	2.43795	0.689348	0.689348	0.475201	1.66927	1.40795	1.40795	1.98232	2.36694
	329	1.01	1.2882	1.81514	0.278195	0.278195	0.0773927	1.27544	0.805135	0.805135	0.648243	1.79716
	330	0.88	1.52136	2.12101	0.641363	0.641363	0.411347	1.72882	1.24101	1.24101	1.5401	2.41023
	331	0.83	1.69611	2.36914	0.866109	0.866109	0.750145	2.0435	1.53914	1.53914	2.36897	2.85439
	332	0.85	1.02146	1.53667	0.171462	0.171462	0.0293994	1.20172	0.686671	0.686671	0.471517	1.80785
	333	0.86	0.973382	1.63033	0.113382	0.113382	0.0128555	1.13184	0.770331	0.770331	0.59341	1.89573
	334	0.8	1.29101	1.93762	0.49101	0.49101	0.241091	1.61376	1.13762	1.13762	1.29418	2.42203
	335	0.91	1.77414	2.5724	0.864138	0.864138	0.746734	1.9496	1.6624	1.6624	2.76357	2.82681
	336	0.94	1.97555	2.65158	1.03555	1.03555	1.07237	2.10165	1.71158	1.71158	2.92952	2.82083
	337	1.05	2.27542	2.8408	1.22542	1.22542	1.50166	2.16707	1.7908	1.7908	3.20695	2.70552
	338	0.84	1.80749	2.17754	0.96749	0.96749	0.936038	2.15177	1.33754	1.33754	1.789	2.5923
	339	0.81	1.72165	2.07757	0.911648	0.911648	0.831102	2.12549	1.26757	1.26757	1.60673	2.5649
	340	0.89	1.7914	2.3337	0.901396	0.901396	0.812514	2.0128	1.4437	1.4437	2.08428	2.62214
	341	0.76	1.58703	1.88083	0.827028	0.827028	0.683976	2.08819	1.12083	1.12083	1.25627	2.47478
	342	0.75	1.90705	2.35227	1.15705	1.15705	1.33877	2.54274	1.60227	1.60227	2.56727	3.13636
	343	0.81	1.9101	2.10831	1.1001	1.1001	1.21022	2.35815	1.29831	1.29831	1.68562	2.60286
	344	0.77	0.995525	1.15758	0.225525	0.225525	0.0508613	1.29289	0.38758	0.38758	0.150218	1.50335
	345	0.68	0.87284	0.954623	0.19284	0.19284	0.0371871	1.28359	0.274623	0.274623	0.0754179	1.40386
	346	0.73	2.02091	2.32563	1.29091	1.29091	1.66645	2.76837	1.59563	1.59563	2.54605	3.1858
	347	0.74	1.99078	2.17247	1.25078	1.25078	1.56445	2.69024	1.43247	1.43247	2.05198	2.93577
	348	0.8	1.31758	1.56784	0.517576	0.517576	0.267885	1.64697	0.767839	0.767839	0.589576	1.9598
	349	0.76	1.67016	2.05111	0.91016	0.91016	0.828391	2.19758	1.29111	1.29111	1.66695	2.69882
	350	0.71	1.13304	1.29303	0.423036	0.423036	0.178959	1.59582	0.58303	0.58303	0.339925	1.82117
	351	0.85	1.01989	1.19729	0.169885	0.169885	0.0288611	1.19987	0.347291	0.347291	0.120611	1.40858
	352	0.94	1.47185	1.66559	0.531845	0.531845	0.282859	1.56579	0.725585	0.725585	0.526474	1.7719
	353	0.97	1.25398	1.50311	0.283982	0.283982	0.0806457	1.29276	0.533107	0.533107	0.284203	1.54959
	354	1.01	1.0506	1.36767	0.0406016	0.0406016	0.00164849	1.0402	0.357672	0.357672	0.127929	1.35413
	355	0.88	1.46087	1.90711	0.580868	0.580868	0.337407	1.66008	1.02711	1.02711	1.05496	2.16718
	356	0.77	1.18719	1.49254	0.41719	0.41719	0.174048	1.54181	0.722543	0.722543	0.522068	1.93837
	357	0.75	1.33585	1.68923	0.585846	0.585846	0.343215	1.78113	0.939232	0.939232	0.882158	2.25231
	358	0.69	1.49436	1.76284	0.804356	0.804356	0.646989	2.16573	1.07284	1.07284	1.15098	2.55484
	359	0.86	1.22062	1.6183	0.360616	0.360616	0.130044	1.41932	0.758303	0.758303	0.575024	1.88175
	360	0.94	1.29702	1.60518	0.357016	0.357016	0.12746	1.3798	0.665178	0.665178	0.442461	1.70764
	361	0.72	1.75821	2.31009	1.03821	1.03821	1.07788	2.44196	1.59009	1.59009	2.5284	3.20846
	362	0.78	1.45148	1.8647	0.671483	0.671483	0.450889	1.86088	1.0847	1.0847	1.17657	2.39064
	363	0.74	1.60292	1.98268	0.862918	0.862918	0.744628	2.16611	1.24268	1.24268	1.54425	2.6793
	364	0.8	1.15554	1.20651	0.35554	0.35554	0.126409	1.44442	0.406507	0.406507	0.165248	1.50813
	365	0.7	1.20198	1.35287	0.501978	0.501978	0.251981	1.71711	0.652871	0.652871	0.42624	1.93267
	toplam	1246	1499.57	2365.9	253.566	258.261	238.241	473.859	1119.9	1121.51	5009.78	692.59
	Ort.	3.4137	4.1084	6.48192	hs-pm	Mutlak değer (hs-pm)	(hs-pm)2	hs/pm	Turc-pm	Mutlak değer (Turc-pm)	(Turc-pm)2	Turc/pm
						HS-PM	Turc-PM
					RMSE (mm/day)	0.807908	3.70478
					MAE (mm)	0.707563	3.07263
					MR	1.29824	1.89751
					PE (%)	20.3504	89.8797
					R2

## Sheet: İst.-ETo-Mardin
		2008-2017 Average ETo values
				ETo-TURC (Ousman Couly (2016)
		O	İ		hs-pm	Absolute value (hs-pm)	(hs-pm)2	hs/pm	Turc-pm	Absolute value (Turc-pm)	(Turc-pm)2	Turc/pm
		ETo-PM	ETo-HS
	1	0.66	1.03838	0.56147	0.378375	0.378375	0.143168	1.5733	-0.0985304	0.0985304	0.00970824	0.850712
	2	0.67	1.20432	0.51142	0.534318	0.534318	0.285496	1.79749	-0.15858	0.15858	0.0251476	0.763314
	3	0.84	0.968195	0.392894	0.128195	0.128195	0.0164341	1.15261	-0.447106	0.447106	0.199904	0.467731
	4	0.81	0.864184	0.552517	0.0541844	0.0541844	0.00293594	1.06689	-0.257483	0.257483	0.0662977	0.682119
	5	0.69	0.681254	0.424513	-0.0087464	0.0087464	7.64996e-05	0.987324	-0.265487	0.265487	0.0704834	0.615236
	6	0.74	0.944246	0.720861	0.204246	0.204246	0.0417164	1.27601	-0.019139	0.019139	0.0003663	0.974137
	7	0.68	0.993365	0.904577	0.313365	0.313365	0.0981976	1.46083	0.224577	0.224577	0.0504347	1.33026
	8	0.8	1.0029	0.838434	0.202901	0.202901	0.0411686	1.25363	0.0384344	0.0384344	0.00147721	1.04804
	9	0.8	0.968585	0.581839	0.168585	0.168585	0.0284208	1.21073	-0.218161	0.218161	0.0475941	0.727299
	10	0.87	1.16347	0.665811	0.293466	0.293466	0.0861223	1.33732	-0.204189	0.204189	0.0416933	0.7653
	11	0.88	1.14404	0.535213	0.264038	0.264038	0.0697161	1.30004	-0.344787	0.344787	0.118878	0.608196
	12	0.87	1.18748	0.639358	0.31748	0.31748	0.100794	1.36492	-0.230642	0.230642	0.0531956	0.734895
	13	0.8	0.90304	0.468749	0.10304	0.10304	0.0106173	1.1288	-0.331251	0.331251	0.109727	0.585936
	14	0.85	1.12971	0.702985	0.27971	0.27971	0.0782379	1.32907	-0.147015	0.147015	0.0216135	0.827041
	15	0.92	0.996568	0.612024	0.0765682	0.0765682	0.00586268	1.08323	-0.307976	0.307976	0.0948493	0.665243
	16	0.98	1.18648	1.0299	0.206478	0.206478	0.0426332	1.21069	0.0498984	0.0498984	0.00248985	1.05092
	17	1.02	1.29152	1.03632	0.271519	0.271519	0.0737227	1.2662	0.0163239	0.0163239	0.00026647	1.016
	18	1.06	1.40851	1.23977	0.348507	0.348507	0.121457	1.32878	0.179767	0.179767	0.0323161	1.16959
	19	0.91	1.32134	1.29553	0.411342	0.411342	0.169202	1.45202	0.385527	0.385527	0.148631	1.42366
	20	0.9	1.5127	1.29749	0.6127	0.6127	0.375402	1.68078	0.397487	0.397487	0.157996	1.44165
	21	1.09	1.53601	1.23266	0.446008	0.446008	0.198924	1.40918	0.142657	0.142657	0.0203511	1.13088
	22	1.2	1.19045	1.07875	-0.00955304	0.00955304	9.12606e-05	0.992039	-0.121246	0.121246	0.0147006	0.898962
	23	1.05	1.15287	1.11775	0.102867	0.102867	0.0105815	1.09797	0.0677522	0.0677522	0.00459036	1.06453
	24	1.23	1.48843	1.31706	0.258429	0.258429	0.0667856	1.21011	0.0870644	0.0870644	0.00758021	1.07078
	25	0.91	1.02675	0.75392	0.116747	0.116747	0.01363	1.12829	-0.15608	0.15608	0.0243609	0.828484
	26	0.88	1.06592	0.390339	0.185922	0.185922	0.0345668	1.21127	-0.489661	0.489661	0.239768	0.443567
	27	0.85	0.7267	0.00179832	-0.1233	0.1233	0.0152029	0.854941	-0.848202	0.848202	0.719446	0.00211567
	28	0.88	0.886458	0.114114	0.00645799	0.00645799	4.17057e-05	1.00734	-0.765886	0.765886	0.586581	0.129675
	29	1.09	1.26245	0.693281	0.172446	0.172446	0.0297376	1.15821	-0.396719	0.396719	0.157386	0.636038
	30	1.15	1.07119	0.722804	-0.0788069	0.0788069	0.00621052	0.931472	-0.427196	0.427196	0.182496	0.628525
	31	1.1	1.08	0.645258	-0.019997	0.019997	0.00039988	0.981821	-0.454742	0.454742	0.20679	0.586599
	32	1.17	1.49261	0.605966	0.322607	0.322607	0.104075	1.27573	-0.564034	0.564034	0.318135	0.517919
	33	1.07	1.22505	0.52308	0.155046	0.155046	0.0240393	1.1449	-0.54692	0.54692	0.299121	0.48886
	34	1.25	1.6116	0.6533	0.361604	0.361604	0.130757	1.28928	-0.5967	0.5967	0.356051	0.52264
	35	1.42	1.68915	1.12389	0.269151	0.269151	0.0724422	1.18954	-0.296111	0.296111	0.0876816	0.791471
	36	1.22	1.40724	0.848987	0.187235	0.187235	0.035057	1.15347	-0.371013	0.371013	0.13765	0.695891
	37	1.3	1.42946	1.10492	0.129456	0.129456	0.0167589	1.09958	-0.19508	0.19508	0.038056	0.849939
	38	1.3	1.65301	1.38883	0.353015	0.353015	0.124619	1.27155	0.0888346	0.0888346	0.00789159	1.06833
	39	1.46	1.74572	1.49247	0.285715	0.285715	0.0816332	1.1957	0.0324707	0.0324707	0.00105435	1.02224
	40	1.56	1.54276	1.21849	-0.0172389	0.0172389	0.00029718	0.988949	-0.341515	0.341515	0.116632	0.78108
	41	1.47	1.62624	1.47443	0.156237	0.156237	0.0244099	1.10628	0.00443132	0.00443132	1.96366e-05	1.00301
	42	1.65	1.92309	1.42994	0.273091	0.273091	0.0745784	1.16551	-0.220061	0.220061	0.0484268	0.86663
	43	1.55	1.38463	1.12207	-0.165375	0.165375	0.0273487	0.893307	-0.427927	0.427927	0.183122	0.723918
	44	1.72	1.41894	1.39002	-0.301064	0.301064	0.0906393	0.824963	-0.329977	0.329977	0.108885	0.808153
	45	1.52	1.3847	1.32843	-0.135299	0.135299	0.0183058	0.910988	-0.191573	0.191573	0.0367004	0.873965
	46	1.65	1.77793	1.48633	0.127928	0.127928	0.0163655	1.07753	-0.163673	0.163673	0.026789	0.900804
	47	1.63	1.92291	1.48133	0.29291	0.29291	0.0857961	1.1797	-0.148668	0.148668	0.022102	0.908793
	48	1.67	1.90054	1.32397	0.230537	0.230537	0.0531472	1.13805	-0.346025	0.346025	0.119733	0.792799
	49	1.82	2.19308	1.91058	0.373083	0.373083	0.139191	1.20499	0.0905842	0.0905842	0.00820549	1.04977
	50	1.81	2.14307	1.83669	0.333069	0.333069	0.110935	1.18402	0.0266858	0.0266858	0.000712132	1.01474
	51	2	2.11105	1.94791	0.111055	0.111055	0.0123331	1.05553	-0.0520934	0.0520934	0.00271372	0.973953
	52	1.76	1.85057	1.47588	0.0905736	0.0905736	0.00820357	1.05146	-0.284118	0.284118	0.0807232	0.838569
	53	1.93	2.13812	1.79819	0.208124	0.208124	0.0433155	1.10784	-0.131805	0.131805	0.0173726	0.931707
	54	1.79	2.0806	1.87703	0.290603	0.290603	0.08445	1.16235	0.0870347	0.0870347	0.00757504	1.04862
	55	2.07	2.53281	2.39582	0.462814	0.462814	0.214197	1.22358	0.32582	0.32582	0.106158	1.1574
	56	1.91	2.03809	1.87054	0.128094	0.128094	0.0164081	1.06706	-0.0394555	0.0394555	0.00155673	0.979343
	57	2.3	2.54297	2.68701	0.242972	0.242972	0.0590352	1.10564	0.38701	0.38701	0.149777	1.16827
	58	2.17	2.43111	2.63329	0.261107	0.261107	0.0681766	1.12033	0.463287	0.463287	0.214635	1.2135
	59	2.01	2.26799	2.26126	0.257987	0.257987	0.0665575	1.12835	0.251256	0.251256	0.0631298	1.125
	60	2.03	2.12034	1.99457	0.0903368	0.0903368	0.00816074	1.0445	-0.0354314	0.0354314	0.00125538	0.982546
	61	2.03	1.90732	1.93801	-0.122679	0.122679	0.01505	0.939567	-0.0919933	0.0919933	0.00846276	0.954683
	62	1.97	1.75326	1.57059	-0.21674	0.21674	0.046976	0.88998	-0.399407	0.399407	0.159526	0.797255
	63	2	1.7475	1.71773	-0.252504	0.252504	0.0637583	0.873748	-0.282271	0.282271	0.0796772	0.858864
	64	1.68	2.40758	2.06074	0.727584	0.727584	0.529379	1.43309	0.380735	0.380735	0.144959	1.22663
	65	2.07	2.83671	2.86831	0.766712	0.766712	0.587847	1.37039	0.798313	0.798313	0.637304	1.38566
	66	2.22	2.45487	2.93109	0.234871	0.234871	0.0551643	1.1058	0.711086	0.711086	0.505643	1.32031
	67	2.18	2.72333	3.37338	0.543325	0.543325	0.295203	1.24923	1.19338	1.19338	1.42415	1.54742
	68	2.76	3.12044	3.9008	0.36044	0.36044	0.129917	1.13059	1.1408	1.1408	1.30143	1.41333
	69	2.73	2.91695	3.53181	0.186953	0.186953	0.0349515	1.06848	0.801815	0.801815	0.642907	1.29371
	70	2.38	2.56352	2.47929	0.183518	0.183518	0.033679	1.07711	0.0992892	0.0992892	0.00985835	1.04172
	71	2.26	2.54472	2.54366	0.284718	0.284718	0.0810646	1.12598	0.283658	0.283658	0.0804617	1.12551
	72	2.2	2.83925	2.899	0.639253	0.639253	0.408645	1.29057	0.699003	0.699003	0.488606	1.31773
	73	2.47	2.62412	2.99499	0.154118	0.154118	0.0237524	1.0624	0.524994	0.524994	0.275619	1.21255
	74	2.41	2.92756	3.19917	0.517557	0.517557	0.267866	1.21475	0.78917	0.78917	0.62279	1.32746
	75	2.39	2.09288	2.46631	-0.297122	0.297122	0.0882815	0.875681	0.0763105	0.0763105	0.00582329	1.03193
	76	2.09	2.0297	2.09934	-0.0602993	0.0602993	0.00363601	0.971149	0.00934452	0.00934452	8.73201e-05	1.00447
	77	2.22	1.8526	1.65386	-0.367395	0.367395	0.134979	0.834507	-0.566137	0.566137	0.320511	0.744983
	78	2.6	2.52862	2.79687	-0.0713758	0.0713758	0.0050945	0.972548	0.196866	0.196866	0.0387562	1.07572
	79	2.77	2.8411	3.00029	0.0711	0.0711	0.00505521	1.02567	0.230285	0.230285	0.0530313	1.08314
	80	2.66	2.89939	3.13617	0.239386	0.239386	0.0573056	1.08999	0.476169	0.476169	0.226737	1.17901
	81	2.79	2.63091	3.15929	-0.159088	0.159088	0.0253091	0.942979	0.369286	0.369286	0.136372	1.13236
	82	2.89	3.22442	3.6367	0.334418	0.334418	0.111836	1.11572	0.746699	0.746699	0.55756	1.25837
	83	3.13	3.31692	3.9715	0.186917	0.186917	0.0349379	1.05972	0.8415	0.8415	0.708122	1.26885
	84	3.24	3.45035	4.24029	0.21035	0.21035	0.0442472	1.06492	1.00029	1.00029	1.00058	1.30873
	85	2.73	3.53784	4.11748	0.807837	0.807837	0.6526	1.29591	1.38748	1.38748	1.92509	1.50823
	86	3.13	3.51755	4.05908	0.387546	0.387546	0.150192	1.12382	0.929084	0.929084	0.863198	1.29683
	87	3.08	3.4804	3.74151	0.400399	0.400399	0.160319	1.13	0.66151	0.66151	0.437595	1.21478
	88	2.61	2.68487	2.98117	0.0748695	0.0748695	0.00560544	1.02869	0.371165	0.371165	0.137764	1.14221
	89	2.91	3.32324	3.82816	0.413245	0.413245	0.170771	1.14201	0.918163	0.918163	0.843023	1.31552
	90	3.02	2.48498	2.95204	-0.535024	0.535024	0.286251	0.82284	-0.067959	0.067959	0.00461843	0.977497
	91	3.22	2.12592	2.49308	-1.09408	1.09408	1.19701	0.660224	-0.726918	0.726918	0.528409	0.774249
	92	3.15	2.60245	3.42692	-0.547549	0.547549	0.29981	0.826175	0.276919	0.276919	0.076684	1.08791
	93	3.32	2.90669	3.70888	-0.413307	0.413307	0.170823	0.87551	0.38888	0.38888	0.151228	1.11713
	94	3.29	3.05371	3.96565	-0.236285	0.236285	0.0558308	0.928181	0.675646	0.675646	0.456498	1.20536
	95	3.03	3.2826	4.30842	0.252602	0.252602	0.0638077	1.08337	1.27842	1.27842	1.63436	1.42192
	96	3.49	3.70887	4.71286	0.21887	0.21887	0.047904	1.06271	1.22286	1.22286	1.49538	1.35039
	97	3.71	3.71713	4.70768	0.00713078	0.00713078	5.08481e-05	1.00192	0.997681	0.997681	0.995368	1.26892
	98	3.43	3.33638	4.04155	-0.0936168	0.0936168	0.0087641	0.972706	0.611553	0.611553	0.373997	1.1783
	99	3.06	2.88536	3.74255	-0.174638	0.174638	0.0304985	0.942929	0.682554	0.682554	0.46588	1.22306
	100	2.74	2.77517	3.29836	0.0351655	0.0351655	0.00123661	1.01283	0.558356	0.558356	0.311761	1.20378
	101	2.88	2.7872	3.40958	-0.0927961	0.0927961	0.00861111	0.967779	0.52958	0.52958	0.280455	1.18388
	102	2.58	2.72321	3.45451	0.143214	0.143214	0.0205103	1.05551	0.874513	0.874513	0.764773	1.33896
	103	2.91	2.49436	3.08475	-0.415643	0.415643	0.172759	0.857168	0.174751	0.174751	0.0305378	1.06005
	104	3.72	2.92499	4.076	-0.795009	0.795009	0.632039	0.786288	0.355998	0.355998	0.126735	1.0957
	105	3.57	3.13427	4.05208	-0.435735	0.435735	0.189865	0.877946	0.482084	0.482084	0.232405	1.13504
	106	3.73	3.44426	4.08379	-0.285744	0.285744	0.0816494	0.923393	0.353794	0.353794	0.12517	1.09485
	107	3.9	3.71994	4.16504	-0.180057	0.180057	0.0324205	0.953832	0.265043	0.265043	0.0702478	1.06796
	108	3.7	3.15333	4.10384	-0.54667	0.54667	0.298848	0.852251	0.40384	0.40384	0.163087	1.10915
	109	4.04	3.78865	5.02895	-0.251347	0.251347	0.0631752	0.937785	0.988953	0.988953	0.978028	1.24479
	110	3.72	3.47237	4.11089	-0.247635	0.247635	0.0613231	0.933431	0.390892	0.390892	0.152796	1.10508
	111	3.9	3.97233	4.95168	0.0723263	0.0723263	0.0052311	1.01855	1.05168	1.05168	1.10604	1.26966
	112	3.63	3.67703	4.95965	0.0470349	0.0470349	0.00221228	1.01296	1.32965	1.32965	1.76796	1.36629
	113	3.74	3.32977	4.64995	-0.41023	0.41023	0.168289	0.890313	0.909949	0.909949	0.828007	1.2433
	114	4.11	3.96136	5.46943	-0.148643	0.148643	0.0220947	0.963834	1.35943	1.35943	1.84804	1.33076
	115	4.01	3.29288	4.9718	-0.71712	0.71712	0.514262	0.821167	0.961798	0.961798	0.925055	1.23985
	116	4.29	4.54734	6.99331	0.257342	0.257342	0.0662247	1.05999	2.70331	2.70331	7.30789	1.63014
	117	4.39	4.82129	7.24024	0.431294	0.431294	0.186014	1.09824	2.85024	2.85024	8.12384	1.64926
	118	4.2	3.97077	5.78442	-0.229235	0.229235	0.0525485	0.94542	1.58442	1.58442	2.5104	1.37724
	119	4.33	4.33042	6.08191	0.000418797	0.000418797	1.75391e-07	1.0001	1.75191	1.75191	3.06917	1.4046
	120	4.25	3.91915	6.18271	-0.330849	0.330849	0.109461	0.922153	1.93271	1.93271	3.73539	1.45476
	121	4.27	3.89563	5.95876	-0.374369	0.374369	0.140152	0.912326	1.68876	1.68876	2.8519	1.39549
	122	3.85	2.95409	4.25756	-0.895909	0.895909	0.802653	0.767296	0.407558	0.407558	0.166103	1.10586
	123	4.9	4.50648	6.90755	-0.393519	0.393519	0.154857	0.91969	2.00755	2.00755	4.03025	1.4097
	124	4.59	3.92713	5.7341	-0.662874	0.662874	0.439402	0.855583	1.1441	1.1441	1.30896	1.24926
	125	4.38	3.81299	5.55099	-0.567014	0.567014	0.321505	0.870545	1.17099	1.17099	1.37122	1.26735
	126	4.12	3.96118	5.75279	-0.158815	0.158815	0.0252223	0.961453	1.63279	1.63279	2.66601	1.39631
	127	3.79	3.49666	4.69117	-0.293343	0.293343	0.0860502	0.922601	0.901174	0.901174	0.812114	1.23778
	128	4.49	3.71778	4.86626	-0.772219	0.772219	0.596322	0.828014	0.376256	0.376256	0.141569	1.0838
	129	4.72	4.06891	5.20615	-0.651086	0.651086	0.423913	0.862058	0.486148	0.486148	0.23634	1.103
	130	4.05	4.00998	5.4795	-0.0400195	0.0400195	0.00160156	0.990119	1.4295	1.4295	2.04347	1.35296
	131	4.23	3.23441	4.49897	-0.995593	0.995593	0.991205	0.764635	0.268974	0.268974	0.072347	1.06359
	132	4.62	4.36349	6.16728	-0.256507	0.256507	0.0657961	0.944479	1.54728	1.54728	2.39407	1.33491
	133	4.54	4.34752	5.92369	-0.192485	0.192485	0.0370503	0.957603	1.38369	1.38369	1.9146	1.30478
	134	4.79	4.50411	6.16431	-0.285892	0.285892	0.0817344	0.940315	1.37431	1.37431	1.88874	1.28691
	135	4.66	4.5085	6.17854	-0.151501	0.151501	0.0229527	0.967489	1.51854	1.51854	2.30595	1.32587
	136	4.73	4.93658	7.04036	0.206576	0.206576	0.0426738	1.04367	2.31036	2.31036	5.33778	1.48845
	137	4.87	4.61081	7.0168	-0.259186	0.259186	0.0671776	0.946779	2.1468	2.1468	4.60876	1.44082
	138	4.84	5.00846	7.23054	0.168455	0.168455	0.0283772	1.0348	2.39054	2.39054	5.7147	1.49391
	139	4.76	4.52151	6.52478	-0.238486	0.238486	0.0568756	0.949898	1.76478	1.76478	3.11443	1.37075
	140	4.91	3.76023	5.2876	-1.14977	1.14977	1.32196	0.765832	0.377602	0.377602	0.142583	1.0769
	141	4.66	3.56217	4.95855	-1.09783	1.09783	1.20523	0.764414	0.298552	0.298552	0.0891335	1.06407
	142	5.1	4.81879	6.36944	-0.281208	0.281208	0.0790779	0.944861	1.26944	1.26944	1.61148	1.24891
	143	4.72	3.6766	5.09036	-1.0434	1.0434	1.08868	0.778941	0.370365	0.370365	0.13717	1.07847
	144	5.28	4.98704	6.73617	-0.292964	0.292964	0.085828	0.944514	1.45617	1.45617	2.12044	1.27579
	145	5.31	4.8827	7.12937	-0.427298	0.427298	0.182584	0.91953	1.81937	1.81937	3.31012	1.34263
	146	4.84	4.67413	6.578	-0.165872	0.165872	0.0275134	0.965729	1.738	1.738	3.02066	1.35909
	147	4.87	4.95138	6.51095	0.0813819	0.0813819	0.00662301	1.01671	1.64095	1.64095	2.69271	1.33695
	148	4.73	4.75898	7.1953	0.0289833	0.0289833	0.00084003	1.00613	2.4653	2.4653	6.07772	1.52121
	149	5.18	4.80153	6.6718	-0.37847	0.37847	0.14324	0.926936	1.4918	1.4918	2.22547	1.28799
	150	5.24	5.22571	8.37494	-0.0142886	0.0142886	0.000204164	0.997273	3.13494	3.13494	9.82782	1.59827
	151	5.65	4.76593	7.12806	-0.884072	0.884072	0.781583	0.843527	1.47806	1.47806	2.18467	1.2616
	152	5.24	5.43188	8.46357	0.191883	0.191883	0.0368191	1.03662	3.22357	3.22357	10.3914	1.61519
	153	5.56	5.99895	9.76792	0.438954	0.438954	0.192681	1.07895	4.20792	4.20792	17.7066	1.75682
	154	5.25	6.34468	10.0304	1.09468	1.09468	1.19833	1.20851	4.78039	4.78039	22.8522	1.91055
	155	5.37	6.53061	10.2859	1.16061	1.16061	1.34702	1.21613	4.91585	4.91585	24.1656	1.91543
	156	5.63	5.60517	8.35906	-0.0248287	0.0248287	0.000616465	0.99559	2.72906	2.72906	7.4478	1.48474
	157	6.4	6.90686	10.6122	0.506858	0.506858	0.256905	1.0792	4.21216	4.21216	17.7423	1.65815
	158	5.41	6.66219	9.55164	1.25219	1.25219	1.56798	1.23146	4.14164	4.14164	17.1532	1.76555
	159	5.12	5.78807	8.76635	0.668066	0.668066	0.446312	1.13048	3.64635	3.64635	13.2959	1.71218
	160	5.25	6.60289	10.9705	1.35289	1.35289	1.83031	1.25769	5.72049	5.72049	32.724	2.08962
	161	5.76	7.28197	9.77565	1.52197	1.52197	2.31639	1.26423	4.01565	4.01565	16.1254	1.69716
	162	6.17	7.3066	10.1144	1.1366	1.1366	1.29186	1.18421	3.94435	3.94435	15.5579	1.63928
	163	6.51	6.93028	10.2359	0.420284	0.420284	0.176639	1.06456	3.72594	3.72594	13.8826	1.57234
	164	6.3	7.11673	10.8092	0.816735	0.816735	0.667055	1.12964	4.50918	4.50918	20.3327	1.71574
	165	6.05	7.21952	11.1889	1.16952	1.16952	1.36778	1.19331	5.13889	5.13889	26.4082	1.8494
	166	5.69	6.94095	11.3799	1.25095	1.25095	1.56487	1.21985	5.68995	5.68995	32.3755	1.99999
	167	6	7.0522	12.0742	1.0522	1.0522	1.10713	1.17537	6.07423	6.07423	36.8963	2.01237
	168	6.08	7.1104	11.8501	1.0304	1.0304	1.06172	1.16947	5.77008	5.77008	33.2938	1.94903
	169	6.3	6.53832	10.2119	0.23832	0.23832	0.0567964	1.03783	3.91188	3.91188	15.3028	1.62093
	170	6.62	6.20397	8.39936	-0.416028	0.416028	0.173079	0.937156	1.77936	1.77936	3.16611	1.26879
	171	6.59	7.05942	10.9747	0.469416	0.469416	0.220351	1.07123	4.3847	4.3847	19.2256	1.66536
	172	6.62	7.49143	11.6634	0.871435	0.871435	0.759398	1.13164	5.04344	5.04344	25.4363	1.76185
	173	6.97	7.71453	12.4765	0.744532	0.744532	0.554328	1.10682	5.50653	5.50653	30.3219	1.79003
	174	6.49	7.62029	13.0477	1.13029	1.13029	1.27756	1.17416	6.55773	6.55773	43.0039	2.01044
	175	5.94	7.36057	12.3671	1.42057	1.42057	2.01801	1.23915	6.42708	6.42708	41.3074	2.082
	176	6.18	6.58395	11.4152	0.403947	0.403947	0.163174	1.06536	5.2352	5.2352	27.4073	1.84712
	177	6.77	7.05308	11.7778	0.283082	0.283082	0.0801354	1.04181	5.00781	5.00781	25.0781	1.73971
	178	6.05	6.54817	11.4854	0.498166	0.498166	0.248169	1.08234	5.43543	5.43543	29.544	1.89842
	179	6.45	7.40689	11.0559	0.956892	0.956892	0.915642	1.14836	4.60586	4.60586	21.214	1.71409
	180	6.57	7.62399	12.3279	1.05399	1.05399	1.11089	1.16042	5.75792	5.75792	33.1536	1.8764
	181	6.45	7.56943	12.5439	1.11943	1.11943	1.25311	1.17355	6.09389	6.09389	37.1355	1.94479
	182	6.54	6.5842	11.3556	0.0441982	0.0441982	0.00195348	1.00676	4.81557	4.81557	23.1897	1.73633
	183	6.68	6.67023	11.4821	-0.00977322	0.00977322	9.55157e-05	0.998537	4.80214	4.80214	23.0605	1.71888
	184	6.84	6.80639	11.7155	-0.0336098	0.0336098	0.00112962	0.995086	4.87549	4.87549	23.7704	1.71279
	185	7.19	6.91137	11.5694	-0.278629	0.278629	0.0776341	0.961248	4.37944	4.37944	19.1795	1.6091
	186	7.06	6.98348	11.7197	-0.0765233	0.0765233	0.00585581	0.989161	4.65972	4.65972	21.713	1.66002
	187	6.83	7.78447	12.0586	0.954466	0.954466	0.911005	1.13975	5.22857	5.22857	27.3379	1.76553
	188	6.1	7.17608	12.4254	1.07608	1.07608	1.15795	1.17641	6.32538	6.32538	40.0104	2.03695
	189	6.04	6.80786	11.4483	0.767859	0.767859	0.589607	1.12713	5.40829	5.40829	29.2496	1.89541
	190	6.68	7.19625	12.6524	0.51625	0.51625	0.266514	1.07728	5.97244	5.97244	35.6701	1.89408
	191	6.92	6.66816	11.2733	-0.251835	0.251835	0.0634209	0.963608	4.35327	4.35327	18.951	1.62909
	192	6.81	6.39364	10.2719	-0.416364	0.416364	0.173359	0.93886	3.46189	3.46189	11.9847	1.50835
	193	6.44	8.03775	12.5132	1.59775	1.59775	2.5528	1.2481	6.07325	6.07325	36.8843	1.94305
	194	6.39	8.02007	12.8416	1.63007	1.63007	2.65713	1.2551	6.45157	6.45157	41.6228	2.00964
	195	6.52	6.07951	9.89706	-0.440486	0.440486	0.194028	0.932441	3.37706	3.37706	11.4046	1.51795
	196	6.71	6.29628	10.2906	-0.413717	0.413717	0.171162	0.938343	3.5806	3.5806	12.8207	1.53362
	197	6.35	7.97206	13.0975	1.62206	1.62206	2.63108	1.25544	6.74747	6.74747	45.5284	2.06259
	198	6.12	7.79626	12.4801	1.67626	1.67626	2.80984	1.2739	6.36008	6.36008	40.4506	2.03923
	199	5.98	7.65367	12.0758	1.67367	1.67367	2.80118	1.27988	6.09576	6.09576	37.1583	2.01936
	200	6.13	7.76395	11.4206	1.63395	1.63395	2.66978	1.26655	5.29062	5.29062	27.9907	1.86307
	201	6.21	7.86262	13.171	1.65262	1.65262	2.73115	1.26612	6.96099	6.96099	48.4554	2.12093
	202	6.09	7.64717	11.4809	1.55717	1.55717	2.42479	1.25569	5.39093	5.39093	29.0621	1.88521
	203	6.15	6.74661	10.6938	0.596608	0.596608	0.355941	1.09701	4.54377	4.54377	20.6459	1.73882
	204	6.69	7.15067	11.1922	0.460671	0.460671	0.212218	1.06886	4.50223	4.50223	20.2701	1.67298
	205	6.47	6.59019	10.1464	0.120189	0.120189	0.0144455	1.01858	3.6764	3.6764	13.516	1.56822
	206	6.39	6.98626	10.6162	0.596262	0.596262	0.355528	1.09331	4.22622	4.22622	17.8609	1.66138
	207	6.34	7.50115	12.0898	1.16115	1.16115	1.34826	1.18315	5.74979	5.74979	33.0601	1.90691
	208	6.33	6.94548	11.0969	0.615476	0.615476	0.378811	1.09723	4.76685	4.76685	22.7229	1.75306
	209	6.09	6.72599	9.5515	0.635988	0.635988	0.40448	1.10443	3.4615	3.4615	11.982	1.56839
	210	5.97	6.22822	9.19892	0.258224	0.258224	0.0666798	1.04325	3.22892	3.22892	10.4259	1.54086
	211	5.86	6.91213	10.4839	1.05213	1.05213	1.10699	1.17955	4.62387	4.62387	21.3802	1.78906
	212	5.89	6.69576	10.2172	0.805755	0.805755	0.649242	1.1368	4.32725	4.32725	18.7251	1.73468
	213	5.73	6.32552	9.99982	0.595521	0.595521	0.354646	1.10393	4.26982	4.26982	18.2314	1.74517
	214	6.09	6.81621	10.3361	0.726211	0.726211	0.527383	1.11925	4.24609	4.24609	18.0293	1.69722
	215	6.01	7.63057	10.8607	1.62057	1.62057	2.62623	1.26964	4.85068	4.85068	23.5291	1.8071
	216	5.76	7.53251	11.2329	1.77251	1.77251	3.14179	1.30773	5.47295	5.47295	29.9531	1.95016
	217	5.67	6.7479	10.536	1.0779	1.0779	1.16187	1.19011	4.86597	4.86597	23.6776	1.8582
	218	5.83	7.10623	10.8298	1.27623	1.27623	1.62876	1.21891	4.99985	4.99985	24.9985	1.85761
	219	6.44	6.32135	9.14529	-0.11865	0.11865	0.0140777	0.981576	2.70529	2.70529	7.31859	1.42008
	220	6.08	6.15084	9.4099	0.0708399	0.0708399	0.00501829	1.01165	3.3299	3.3299	11.0883	1.54768
	221	5.95	7.21504	10.5101	1.26504	1.26504	1.60032	1.21261	4.56008	4.56008	20.7943	1.7664
	222	5.54	6.8706	9.93353	1.3306	1.3306	1.7705	1.24018	4.39353	4.39353	19.3031	1.79306
	223	6.06	7.23112	9.57264	1.17112	1.17112	1.37153	1.19325	3.51264	3.51264	12.3387	1.57964
	224	5.43	7.263	10.1026	1.833	1.833	3.35989	1.33757	4.67261	4.67261	21.8333	1.86052
	225	5.16	7.1252	9.78811	1.9652	1.9652	3.862	1.38085	4.62811	4.62811	21.4194	1.89692
	226	5.64	7.13337	9.95213	1.49337	1.49337	2.23016	1.26478	4.31213	4.31213	18.5945	1.76456
	227	5.52	5.43652	7.88351	-0.0834848	0.0834848	0.00696971	0.984876	2.36351	2.36351	5.58618	1.42817
	228	5.16	6.79391	10.0482	1.63391	1.63391	2.66968	1.31665	4.88819	4.88819	23.8944	1.94732
	229	5.26	6.74076	9.89521	1.48076	1.48076	2.19265	1.28151	4.63521	4.63521	21.4852	1.88122
	230	5.22	6.8022	9.72958	1.5822	1.5822	2.50336	1.3031	4.50958	4.50958	20.3363	1.8639
	231	5.02	6.93993	10.1225	1.91993	1.91993	3.68613	1.38246	5.10248	5.10248	26.0353	2.01643
	232	5.14	6.69256	9.27735	1.55256	1.55256	2.41045	1.30205	4.13735	4.13735	17.1177	1.80493
	233	5.2	5.82368	8.0173	0.623683	0.623683	0.388981	1.11994	2.8173	2.8173	7.93716	1.54179
	234	5.39	6.06158	9.36577	0.67158	0.67158	0.45102	1.1246	3.97577	3.97577	15.8068	1.73762
	235	4.9	6.67466	10.0386	1.77466	1.77466	3.14942	1.36218	5.13863	5.13863	26.4055	2.0487
	236	5.23	6.70474	9.98299	1.47474	1.47474	2.17486	1.28198	4.75299	4.75299	22.5909	1.90879
	237	4.76	6.14883	9.40256	1.38883	1.38883	1.92886	1.29177	4.64256	4.64256	21.5533	1.97533
	238	4.67	5.99719	9.37966	1.32719	1.32719	1.76142	1.28419	4.70966	4.70966	22.1809	2.00849
	239	4.69	5.90209	8.96416	1.21209	1.21209	1.46917	1.25844	4.27416	4.27416	18.2684	1.91133
	240	4.98	6.52094	9.64042	1.54094	1.54094	2.37449	1.30943	4.66042	4.66042	21.7195	1.93583
	241	5.07	5.74331	8.50602	0.673306	0.673306	0.453341	1.1328	3.43602	3.43602	11.8062	1.67772
	242	4.91	5.92996	8.49476	1.01996	1.01996	1.04031	1.20773	3.58476	3.58476	12.8505	1.73009
	243	4.67	5.57438	8.40549	0.904383	0.904383	0.817909	1.19366	3.73549	3.73549	13.9539	1.79989
	244	4.44	6.3536	9.63737	1.9136	1.9136	3.66186	1.43099	5.19737	5.19737	27.0127	2.17058
	245	4.61	6.24428	9.24603	1.63428	1.63428	2.67086	1.35451	4.63603	4.63603	21.4928	2.00565
	246	4.66	6.13995	9.93161	1.47995	1.47995	2.19026	1.31759	5.27161	5.27161	27.7898	2.13125
	247	4.72	6.18742	9.26316	1.46742	1.46742	2.15331	1.31089	4.54316	4.54316	20.6403	1.96253
	248	4.62	4.97654	7.44958	0.356545	0.356545	0.127124	1.07717	2.82958	2.82958	8.0065	1.61246
	249	4.15	5.43407	8.43309	1.28407	1.28407	1.64882	1.30941	4.28309	4.28309	18.3448	2.03207
	250	4.09	5.60882	9.32319	1.51882	1.51882	2.30681	1.37135	5.23319	5.23319	27.3863	2.27951
	251	4.21	5.82668	9.86231	1.61668	1.61668	2.61365	1.38401	5.65231	5.65231	31.9487	2.34259
	252	4.13	5.74186	9.20411	1.61186	1.61186	2.59808	1.39028	5.07411	5.07411	25.7466	2.2286
	253	3.97	5.59625	8.26057	1.62625	1.62625	2.64468	1.40963	4.29057	4.29057	18.409	2.08075
	254	4.42	5.53668	8.56347	1.11668	1.11668	1.24697	1.25264	4.14347	4.14347	17.1683	1.93744
	255	3.92	4.34514	6.60016	0.425136	0.425136	0.180741	1.10845	2.68016	2.68016	7.18328	1.68372
	256	4.13	5.42311	8.22051	1.29311	1.29311	1.67213	1.3131	4.09051	4.09051	16.7323	1.99044
	257	3.68	5.31487	8.26459	1.63487	1.63487	2.67282	1.44426	4.58459	4.58459	21.0185	2.24581
	258	3.32	5.11061	7.94175	1.79061	1.79061	3.2063	1.53934	4.62175	4.62175	21.3606	2.39209
	259	3.45	5.254	7.87061	1.804	1.804	3.25441	1.5229	4.42061	4.42061	19.5418	2.28134
	260	3.69	5.21109	7.62689	1.52109	1.52109	2.31372	1.41222	3.93689	3.93689	15.4991	2.06691
	261	3.36	4.72923	6.7046	1.36923	1.36923	1.87479	1.40751	3.3446	3.3446	11.1864	1.99542
	262	3.67	4.19212	5.50349	0.522122	0.522122	0.272611	1.14227	1.83349	1.83349	3.36169	1.49959
	263	3.43	4.31143	5.71962	0.881426	0.881426	0.776912	1.25698	2.28962	2.28962	5.24235	1.66753
	264	3.32	4.49831	6.20139	1.17831	1.17831	1.38841	1.35491	2.88139	2.88139	8.3024	1.86789
	265	3.27	4.42891	5.06144	1.15891	1.15891	1.34307	1.35441	1.79144	1.79144	3.20927	1.54784
	266	3.21	4.29719	5.09415	1.08719	1.08719	1.18198	1.33869	1.88415	1.88415	3.55001	1.58696
	267	3.39	4.32947	6.07036	0.93947	0.93947	0.882604	1.27713	2.68036	2.68036	7.18434	1.79067
	268	3.08	3.95683	6.52518	0.876829	0.876829	0.76883	1.28468	3.44518	3.44518	11.8693	2.11857
	269	3.14	4.38201	6.76451	1.24201	1.24201	1.5426	1.39555	3.62451	3.62451	13.1371	2.1543
	270	3.04	4.19496	6.1938	1.15496	1.15496	1.33394	1.37992	3.1538	3.1538	9.94645	2.03743
	271	3.14	3.90844	4.8238	0.768444	0.768444	0.590507	1.24473	1.6838	1.6838	2.83517	1.53624
	272	2.82	3.7563	5.07407	0.936304	0.936304	0.876665	1.33202	2.25407	2.25407	5.08084	1.79932
	273	2.87	3.53448	4.80864	0.66448	0.66448	0.441534	1.23153	1.93864	1.93864	3.75832	1.67548
	274	2.66	3.86503	5.49584	1.20503	1.20503	1.4521	1.45302	2.83584	2.83584	8.042	2.06611
	275	2.59	3.55595	5.70019	0.965954	0.965954	0.933067	1.37296	3.11019	3.11019	9.67327	2.20084
	276	2.8	3.74239	5.5187	0.942393	0.942393	0.888104	1.33657	2.7187	2.7187	7.39135	1.97097
	277	2.62	3.32012	5.28494	0.700123	0.700123	0.490172	1.26722	2.66494	2.66494	7.10193	2.01715
	278	2.48	3.59714	5.6987	1.11714	1.11714	1.24801	1.45046	3.2187	3.2187	10.3601	2.29786
	279	2.5	3.02948	4.84297	0.529476	0.529476	0.280344	1.21179	2.34297	2.34297	5.4895	1.93719
	280	2.4	3.00866	4.8464	0.608658	0.608658	0.370465	1.25361	2.4464	2.4464	5.98489	2.01934
	281	2.48	3.12165	4.94465	0.641651	0.641651	0.411716	1.25873	2.46465	2.46465	6.07448	1.99381
	282	2.36	3.476	5.25298	1.116	1.116	1.24547	1.47288	2.89298	2.89298	8.36931	2.22584
	283	2.31	2.66369	4.14094	0.353689	0.353689	0.125096	1.15311	1.83094	1.83094	3.35235	1.79262
	284	2.22	3.18807	5.38729	0.968065	0.968065	0.93715	1.43607	3.16729	3.16729	10.0317	2.42671
	285	2.42	3.56159	5.70859	1.14159	1.14159	1.30322	1.47173	3.28859	3.28859	10.8148	2.35892
	286	2.12	2.64539	3.47638	0.525386	0.525386	0.27603	1.24782	1.35638	1.35638	1.83977	1.6398
	287	2.02	1.978	2.85676	-0.0420048	0.0420048	0.0017644	0.979206	0.836764	0.836764	0.700175	1.41424
	288	2.43	2.77346	4.4292	0.343463	0.343463	0.117967	1.14134	1.9992	1.9992	3.99682	1.82272
	289	2.48	2.92004	4.22603	0.440041	0.440041	0.193636	1.17744	1.74603	1.74603	3.04861	1.70404
	290	2.34	1.96135	3.14726	-0.378647	0.378647	0.143373	0.838185	0.807263	0.807263	0.651673	1.34498
	291	2.14	2.42516	3.36706	0.285161	0.285161	0.0813166	1.13325	1.22706	1.22706	1.50568	1.57339
	292	2.01	2.82811	4.0089	0.818107	0.818107	0.669299	1.40702	1.9989	1.9989	3.99561	1.99448
	293	2.45	2.907	3.58472	0.456996	0.456996	0.208846	1.18653	1.13472	1.13472	1.28758	1.46315
	294	2.13	3.0725	3.97387	0.942496	0.942496	0.888298	1.44249	1.84387	1.84387	3.39987	1.86567
	295	2	3.06613	4.02098	1.06613	1.06613	1.13664	1.53307	2.02098	2.02098	4.08438	2.01049
	296	1.85	2.61459	3.63211	0.764591	0.764591	0.5846	1.41329	1.78211	1.78211	3.17592	1.9633
	297	1.63	2.3124	3.22674	0.682402	0.682402	0.465672	1.41865	1.59674	1.59674	2.54957	1.97959
	298	1.71	2.52132	3.39955	0.811323	0.811323	0.658245	1.47446	1.68955	1.68955	2.85458	1.98804
	299	1.77	2.58392	3.36366	0.813918	0.813918	0.662462	1.45984	1.59366	1.59366	2.53975	1.90037
	300	1.71	2.20659	3.23475	0.496589	0.496589	0.246601	1.2904	1.52475	1.52475	2.32485	1.89166
	301	1.65	1.63712	2.43563	-0.012876	0.012876	0.000165791	0.992196	0.785635	0.785635	0.617222	1.47614
	302	1.7	2.09836	2.77288	0.398361	0.398361	0.158691	1.23433	1.07288	1.07288	1.15108	1.63111
	303	1.89	2.04528	2.84803	0.15528	0.15528	0.024112	1.08216	0.958031	0.958031	0.917824	1.50689
	304	1.43	1.26457	1.92557	-0.165428	0.165428	0.0273663	0.884316	0.495571	0.495571	0.24559	1.34655
	305	1.38	1.78336	2.38929	0.403357	0.403357	0.162697	1.29229	1.00929	1.00929	1.01868	1.73137
	306	1.34	2.35401	2.98754	1.01401	1.01401	1.02821	1.75672	1.64754	1.64754	2.71439	2.22951
	307	1.34	2.29613	2.82936	0.956132	0.956132	0.914189	1.71353	1.48936	1.48936	2.21819	2.11146
	308	1.41	2.16086	2.6536	0.750858	0.750858	0.563788	1.53252	1.2436	1.2436	1.54654	1.88198
	309	1.54	2.42936	2.75673	0.889357	0.889357	0.790955	1.5775	1.21673	1.21673	1.48042	1.79008
	310	1.54	2.02767	2.47705	0.487674	0.487674	0.237826	1.31667	0.937052	0.937052	0.878067	1.60848
	311	1.69	2.65049	3.15238	0.960492	0.960492	0.922545	1.56834	1.46238	1.46238	2.13856	1.86531
	312	1.51	1.96998	2.651	0.45998	0.45998	0.211581	1.30462	1.141	1.141	1.30187	1.75563
	313	1.42	2.15832	2.74659	0.738322	0.738322	0.545119	1.51994	1.32659	1.32659	1.75985	1.93422
	314	1.48	2.02861	2.38305	0.548613	0.548613	0.300976	1.37068	0.903054	0.903054	0.815507	1.61017
	315	1.49	2.10948	2.57477	0.619478	0.619478	0.383753	1.41576	1.08477	1.08477	1.17673	1.72804
	316	1.41	2.54669	3.10092	1.13669	1.13669	1.29206	1.80616	1.69092	1.69092	2.85923	2.19924
	317	1.39	2.69601	2.98229	1.30601	1.30601	1.70567	1.93958	1.59229	1.59229	2.53538	2.14553
	318	1.27	2.31172	2.68192	1.04172	1.04172	1.08518	1.82025	1.41192	1.41192	1.99351	2.11174
	319	1.2	1.65325	1.90552	0.453251	0.453251	0.205437	1.37771	0.705525	0.705525	0.497765	1.58794
	320	1.21	2.20812	2.61422	0.998123	0.998123	0.996249	1.82489	1.40422	1.40422	1.97184	2.16051
	321	1.05	1.94557	2.20714	0.895571	0.895571	0.802047	1.85292	1.15714	1.15714	1.33897	2.10204
	322	1.16	2.13848	2.48568	0.97848	0.97848	0.957422	1.84352	1.32568	1.32568	1.75743	2.14283
	323	1.16	1.6193	1.85232	0.459295	0.459295	0.210952	1.39594	0.692321	0.692321	0.479308	1.59683
	324	1.08	1.98382	2.43794	0.903816	0.903816	0.816884	1.83687	1.35794	1.35794	1.844	2.25735
	325	1.11	1.66044	2.20177	0.550439	0.550439	0.302983	1.49589	1.09177	1.09177	1.19197	1.98358
	326	1.1	1.87916	2.11775	0.779156	0.779156	0.607084	1.70832	1.01775	1.01775	1.03582	1.92523
	327	1.07	2.08303	2.16669	1.01303	1.01303	1.02622	1.94675	1.09669	1.09669	1.20272	2.02494
	328	1.04	1.94706	2.01037	0.907059	0.907059	0.822756	1.87217	0.970371	0.970371	0.94162	1.93305
	329	1.07	1.87008	1.87491	0.800075	0.800075	0.640121	1.74773	0.804907	0.804907	0.647876	1.75225
	330	1.01	1.65362	1.67498	0.643616	0.643616	0.414242	1.63724	0.664979	0.664979	0.442197	1.65839
	331	0.94	1.71487	1.82884	0.77487	0.77487	0.600423	1.82433	0.888836	0.888836	0.79003	1.94557
	332	0.98	1.79512	1.97798	0.815118	0.815118	0.664417	1.83175	0.997983	0.997983	0.99597	2.01835
	333	0.93	1.46017	1.65013	0.530166	0.530166	0.281076	1.57007	0.720126	0.720126	0.518581	1.77433
	334	0.97	1.91812	2.00262	0.948117	0.948117	0.898925	1.97744	1.03262	1.03262	1.0663	2.06455
	335	0.83	1.88342	2.06736	1.05342	1.05342	1.1097	2.26919	1.23736	1.23736	1.53105	2.49079
	336	0.91	1.82893	2.04707	0.918934	0.918934	0.844439	2.00982	1.13707	1.13707	1.29294	2.24953
	337	1.04	1.4771	1.97814	0.437102	0.437102	0.191058	1.42029	0.93814	0.93814	0.880107	1.90206
	338	0.81	1.73063	1.46822	0.920629	0.920629	0.847558	2.13658	0.65822	0.65822	0.433254	1.81262
	339	0.74	1.77796	2.01055	1.03796	1.03796	1.07736	2.40265	1.27055	1.27055	1.6143	2.71696
	340	0.91	2.06246	2.14893	1.15246	1.15246	1.32816	2.26644	1.23893	1.23893	1.53496	2.36147
	341	0.8	1.76206	1.45743	0.962065	0.962065	0.925568	2.20258	0.657428	0.657428	0.432211	1.82178
	342	0.76	1.71301	1.60243	0.953007	0.953007	0.908223	2.25396	0.84243	0.84243	0.709688	2.10846
	343	0.78	1.40458	1.23773	0.624584	0.624584	0.390105	1.80075	0.457729	0.457729	0.209516	1.58683
	344	0.73	1.50638	1.16714	0.776376	0.776376	0.60276	2.06353	0.437143	0.437143	0.191094	1.59883
	345	0.72	1.54412	1.32126	0.824116	0.824116	0.679168	2.14461	0.601256	0.601256	0.361508	1.83508
	346	0.77	1.40092	1.13941	0.630924	0.630924	0.398065	1.81938	0.369412	0.369412	0.136465	1.47976
	347	0.77	1.2839	0.803396	0.513898	0.513898	0.264091	1.6674	0.0333963	0.0333963	0.00111531	1.04337
	348	0.79	1.27443	1.00411	0.484431	0.484431	0.234673	1.6132	0.214108	0.214108	0.0458423	1.27102
	349	0.83	1.36316	1.1315	0.533162	0.533162	0.284262	1.64236	0.3015	0.3015	0.0909022	1.36325
	350	0.8	1.56477	1.19491	0.764768	0.764768	0.584871	1.95596	0.39491	0.39491	0.155954	1.49364
	351	0.79	1.4315	1.1337	0.641505	0.641505	0.411528	1.81203	0.343705	0.343705	0.118133	1.43507
	352	0.85	1.37018	1.01085	0.520181	0.520181	0.270588	1.61198	0.160849	0.160849	0.0258723	1.18923
	353	0.84	1.54498	1.2535	0.704981	0.704981	0.496998	1.83926	0.413496	0.413496	0.170979	1.49226
	354	0.92	1.62884	1.29913	0.708843	0.708843	0.502458	1.77048	0.379127	0.379127	0.143737	1.41209
	355	0.83	1.68091	1.36887	0.850912	0.850912	0.724052	2.0252	0.538873	0.538873	0.290384	1.64924
	356	0.72	1.22373	1.18137	0.50373	0.50373	0.253744	1.69963	0.461369	0.461369	0.212861	1.64079
	357	0.75	1.49415	1.44702	0.744151	0.744151	0.55376	1.9922	0.697016	0.697016	0.485832	1.92936
	358	0.73	1.45437	1.41417	0.724371	0.724371	0.524714	1.99229	0.684172	0.684172	0.468091	1.93722
	359	0.85	1.52649	1.5515	0.676491	0.676491	0.45764	1.79587	0.701498	0.701498	0.4921	1.82529
	360	0.86	1.42865	1.40577	0.568646	0.568646	0.323359	1.66122	0.545766	0.545766	0.29786	1.63461
	361	0.77	1.53045	1.57308	0.760449	0.760449	0.578283	1.9876	0.803083	0.803083	0.644942	2.04297
	362	0.8	1.70307	1.65232	0.903073	0.903073	0.81554	2.12884	0.852322	0.852322	0.726453	2.0654
	363	0.83	1.48778	1.37756	0.657783	0.657783	0.432679	1.79251	0.547561	0.547561	0.299823	1.65971
	364	0.8	1.38026	1.14925	0.580262	0.580262	0.336704	1.72533	0.349252	0.349252	0.121977	1.43656
	365	0.72	1.06278	0.807783	0.342775	0.342775	0.117495	1.47608	0.0877827	0.0877827	0.00770579	1.12192
	toplam	1195.11	1376.91	1919.71	181.796	235.145	235.067	453.913	724.595	752.809	2845.85	556.232
	Ort.	3.27427	3.77234	5.25947	hs-pm	Mutlak değer (hs-pm)	(hs-pm)2	hs/pm	Turc-pm	Mutlak değer (Turc-pm)	(Turc-pm)2	Turc/pm
						HS-PM	Turc-PM
					RMSE (mm/day)	0.802509	2.79228
					MAE (mm)	0.644233	2.06249
					MR	1.2436	1.52392
					PE (%)	15.2116	60.63
					R2

## Sheet: İst.-ETo-Batman
		2008-2017 Average ETo values
				ETo-TURC (Ousman Couly (2016)
		O	i		hs-pm	Absolute value (hs-pm)	(hs-pm)2	hs/pm	Turc-pm	Absolute value (Turc-pm)	(Turc-pm)2	Turc/pm
		ETo-PM	ETo-HS
	1	0.57	0.849479	0.0427801	0.279479	0.279479	0.0781087	1.49031	-0.52722	0.52722	0.277961	0.0750528
	2	0.6	0.586539	-1.26857	-0.0134609	0.0134609	0.000181196	0.977565	-1.86857	1.86857	3.49154	-2.11428
	3	0.68	0.642629	6.08401	-0.037371	0.037371	0.00139659	0.945043	5.40401	5.40401	29.2033	8.94707
	4	0.77	0.577285	-0.662879	-0.192715	0.192715	0.0371392	0.74972	-1.43288	1.43288	2.05314	-0.860882
	5	0.58	0.73064	0.158662	0.15064	0.15064	0.0226925	1.25972	-0.421338	0.421338	0.177526	0.273554
	6	0.66	0.824759	0.568879	0.164759	0.164759	0.0271455	1.24963	-0.091121	0.091121	0.00830304	0.861938
	7	0.59	0.565148	0.465667	-0.0248522	0.0248522	0.000617631	0.957878	-0.124333	0.124333	0.0154588	0.789266
	8	0.8	0.668827	0.388862	-0.131173	0.131173	0.0172065	0.836033	-0.411138	0.411138	0.169034	0.486078
	9	0.78	1.04961	0.626607	0.269608	0.269608	0.0726882	1.34565	-0.153393	0.153393	0.0235295	0.803342
	10	0.81	0.668182	-0.157302	-0.141818	0.141818	0.0201122	0.824917	-0.967302	0.967302	0.935673	-0.1942
	11	0.73	0.765641	-0.0255429	0.0356411	0.0356411	0.00127029	1.04882	-0.755543	0.755543	0.570845	-0.0349902
	12	0.69	0.969738	0.270949	0.279738	0.279738	0.0782532	1.40542	-0.419051	0.419051	0.175604	0.392679
	13	0.61	0.852683	0.24647	0.242683	0.242683	0.0588951	1.39784	-0.36353	0.36353	0.132154	0.40405
	14	0.66	1.13591	0.589725	0.475912	0.475912	0.226492	1.72108	-0.0702747	0.0702747	0.00493854	0.893523
	15	0.67	1.08052	0.472536	0.410516	0.410516	0.168523	1.61271	-0.197464	0.197464	0.038992	0.705278
	16	0.76	0.96896	0.492346	0.20896	0.20896	0.0436644	1.27495	-0.267654	0.267654	0.0716389	0.647823
	17	0.78	1.16825	0.894382	0.388245	0.388245	0.150734	1.49775	0.114382	0.114382	0.0130832	1.14664
	18	0.73	0.813243	0.667047	0.0832431	0.0832431	0.00692942	1.11403	-0.0629528	0.0629528	0.00396305	0.913763
	19	0.63	0.872173	0.679284	0.242173	0.242173	0.0586476	1.3844	0.0492838	0.0492838	0.0024289	1.07823
	20	0.69	0.813103	0.590903	0.123103	0.123103	0.0151544	1.17841	-0.0990975	0.0990975	0.00982031	0.85638
	21	0.79	1.26375	0.799534	0.473751	0.473751	0.22444	1.59968	0.00953373	0.00953373	9.0892e-05	1.01207
	22	0.85	0.937484	0.777329	0.0874836	0.0874836	0.00765338	1.10292	-0.072671	0.072671	0.00528108	0.914505
	23	0.88	0.801437	0.605114	-0.0785629	0.0785629	0.00617213	0.910724	-0.274886	0.274886	0.0755624	0.687629
	24	0.78	0.984323	0.745095	0.204323	0.204323	0.0417478	1.26195	-0.0349045	0.0349045	0.00121833	0.955251
	25	0.71	0.963267	0.787948	0.253267	0.253267	0.0641442	1.35671	0.0779483	0.0779483	0.00607594	1.10979
	26	0.76	1.16108	0.970518	0.401079	0.401079	0.160864	1.52774	0.210518	0.210518	0.0443178	1.277
	27	0.81	0.927257	0.219961	0.117257	0.117257	0.0137493	1.14476	-0.590039	0.590039	0.348146	0.271557
	28	0.7	0.638752	0.0994229	-0.0612479	0.0612479	0.0037513	0.912503	-0.600577	0.600577	0.360693	0.142033
	29	1.03	1.04209	0.798483	0.0120884	0.0120884	0.000146129	1.01174	-0.231517	0.231517	0.0536003	0.775226
	30	0.9	1.44319	-0.454136	0.543194	0.543194	0.295059	1.60355	-1.35414	1.35414	1.83369	-0.504596
	31	1.11	1.56118	1.29141	0.451178	0.451178	0.203561	1.40647	0.181409	0.181409	0.0329093	1.16343
	32	0.86	1.33913	0.809205	0.479126	0.479126	0.229562	1.55712	-0.0507951	0.0507951	0.00258014	0.940936
	33	0.84	0.89352	-0.823596	0.0535198	0.0535198	0.00286436	1.06371	-1.6636	1.6636	2.76755	-0.980471
	34	0.95	0.876111	-0.458435	-0.0738887	0.0738887	0.00545953	0.922222	-1.40843	1.40843	1.98369	-0.482563
	35	0.94	1.4805	-0.291066	0.540501	0.540501	0.292142	1.575	-1.23107	1.23107	1.51552	-0.309645
	36	0.91	1.2277	0.450968	0.317696	0.317696	0.100931	1.34912	-0.459032	0.459032	0.21071	0.49557
	37	0.97	1.05624	0.449668	0.0862408	0.0862408	0.00743747	1.08891	-0.520332	0.520332	0.270745	0.463576
	38	0.93	0.796164	0.481448	-0.133836	0.133836	0.0179121	0.85609	-0.448552	0.448552	0.201199	0.517686
	39	1.03	1.04554	0.979546	0.015543	0.015543	0.000241583	1.01509	-0.0504541	0.0504541	0.00254562	0.951015
	40	1.16	1.44354	1.38358	0.283544	0.283544	0.0803971	1.24443	0.22358	0.22358	0.0499882	1.19274
	41	1.14	1.17153	1.29845	0.0315344	0.0315344	0.000994418	1.02766	0.158454	0.158454	0.0251075	1.13899
	42	1.23	1.1712	1.128	-0.0588029	0.0588029	0.00345778	0.952193	-0.101999	0.101999	0.0104038	0.917074
	43	1.1	1.15233	1.11661	0.0523333	0.0523333	0.00273878	1.04758	0.0166144	0.0166144	0.000276038	1.0151
	44	1.14	1.15015	1.27534	0.0101475	0.0101475	0.000102973	1.0089	0.135338	0.135338	0.0183164	1.11872
	45	1.22	1.56172	1.97837	0.341721	0.341721	0.116773	1.2801	0.758365	0.758365	0.575118	1.62161
	46	1.34	1.64364	1.92897	0.303642	0.303642	0.0921983	1.2266	0.588966	0.588966	0.346881	1.43953
	47	1.15	1.13049	1.44782	-0.0195055	0.0195055	0.000380463	0.983039	0.297821	0.297821	0.0886976	1.25898
	48	1.22	1.11095	1.49956	-0.109053	0.109053	0.0118926	0.910612	0.279563	0.279563	0.0781553	1.22915
	49	1.38	1.43667	1.60911	0.0566697	0.0566697	0.00321146	1.04107	0.229106	0.229106	0.0524896	1.16602
	50	1.42	1.98458	2.24581	0.564579	0.564579	0.318749	1.39759	0.825807	0.825807	0.681957	1.58155
	51	1.46	2.06161	2.16725	0.601612	0.601612	0.361937	1.41206	0.707251	0.707251	0.500204	1.48442
	52	1.58	1.84865	1.80059	0.268654	0.268654	0.0721752	1.17003	0.220593	0.220593	0.0486614	1.13962
	53	1.81	2.15486	2.29106	0.344856	0.344856	0.118926	1.19053	0.481055	0.481055	0.231414	1.26578
	54	1.6	1.83014	2.17498	0.230141	0.230141	0.0529647	1.14384	0.57498	0.57498	0.330602	1.35936
	55	1.6	1.36773	1.86665	-0.232272	0.232272	0.0539502	0.85483	0.266651	0.266651	0.0711029	1.16666
	56	1.7	1.57759	2.10095	-0.122409	0.122409	0.014984	0.927995	0.400952	0.400952	0.160763	1.23585
	57	1.99	1.98822	2.56105	-0.00177768	0.00177768	3.16014e-06	0.999107	0.571047	0.571047	0.326095	1.28696
	58	1.73	2.18075	2.95616	0.450753	0.450753	0.203178	1.26055	1.22616	1.22616	1.50346	1.70876
	59	1.68	2.14813	2.72086	0.468129	0.468129	0.219145	1.27865	1.04086	1.04086	1.08339	1.61956
	60	1.7	2.14144	2.71014	0.441438	0.441438	0.194867	1.25967	1.01014	1.01014	1.02037	1.5942
	61	1.62	2.05874	2.64589	0.438741	0.438741	0.192494	1.27083	1.02589	1.02589	1.05245	1.63327
	62	1.61	1.74927	2.25706	0.139273	0.139273	0.019397	1.08651	0.647062	0.647062	0.41869	1.4019
	63	1.79	2.4289	2.76322	0.638904	0.638904	0.408199	1.35693	0.973223	0.973223	0.947164	1.5437
	64	1.78	2.34877	2.73653	0.568767	0.568767	0.323496	1.31953	0.956526	0.956526	0.914942	1.53737
	65	2.01	2.4725	3.29786	0.462495	0.462495	0.213902	1.2301	1.28786	1.28786	1.65859	1.64073
	66	1.94	2.54863	3.4137	0.608632	0.608632	0.370433	1.31373	1.4737	1.4737	2.17178	1.75964
	67	1.98	1.92057	2.9325	-0.0594341	0.0594341	0.00353241	0.969983	0.952505	0.952505	0.907265	1.48106
	68	2.42	2.42839	3.84799	0.00838852	0.00838852	7.03674e-05	1.00347	1.42799	1.42799	2.03915	1.59008
	69	1.95	1.47119	2.36237	-0.478807	0.478807	0.229256	0.754458	0.412375	0.412375	0.170053	1.21147
	70	2.18	2.49378	3.7329	0.313775	0.313775	0.0984549	1.14393	1.5529	1.5529	2.41149	1.71234
	71	2.3	2.76155	3.57078	0.461555	0.461555	0.213033	1.20068	1.27078	1.27078	1.61488	1.55251
	72	1.96	2.33189	3.12923	0.371889	0.371889	0.138301	1.18974	1.16923	1.16923	1.36711	1.59655
	73	1.93	2.12671	3.17882	0.196712	0.196712	0.0386958	1.10192	1.24882	1.24882	1.55956	1.64706
	74	2.02	2.21223	3.39399	0.192228	0.192228	0.0369517	1.09516	1.37399	1.37399	1.88784	1.68019
	75	2.41	3.02237	3.88199	0.612374	0.612374	0.375002	1.2541	1.47199	1.47199	2.16674	1.61078
	76	2.29	2.80396	3.74463	0.513962	0.513962	0.264157	1.22444	1.45463	1.45463	2.11596	1.63521
	77	2.08	2.25376	2.87058	0.173758	0.173758	0.0301917	1.08354	0.790583	0.790583	0.625022	1.38009
	78	2.1	2.02811	3.04597	-0.07189	0.07189	0.00516817	0.965767	0.945969	0.945969	0.894857	1.45046
	79	2.29	2.76199	4.12699	0.471994	0.471994	0.222778	1.20611	1.83699	1.83699	3.37454	1.80218
	80	2.29	1.95851	3.06167	-0.331486	0.331486	0.109883	0.855246	0.771668	0.771668	0.595472	1.33697
	81	2.7	2.28572	3.48951	-0.414282	0.414282	0.17163	0.846562	0.789506	0.789506	0.62332	1.29241
	82	2.62	2.46852	3.9327	-0.15148	0.15148	0.0229463	0.942183	1.3127	1.3127	1.72319	1.50103
	83	2.9	2.76254	4.30488	-0.137465	0.137465	0.0188966	0.952598	1.40488	1.40488	1.97368	1.48444
	84	2.86	2.87498	4.7384	0.0149762	0.0149762	0.000224287	1.00524	1.8784	1.8784	3.52839	1.65678
	85	2.74	2.97537	4.88698	0.235366	0.235366	0.0553973	1.0859	2.14698	2.14698	4.60953	1.78357
	86	2.85	3.42985	5.65537	0.579846	0.579846	0.336221	1.20345	2.80537	2.80537	7.87008	1.98434
	87	2.45	2.72694	4.27438	0.276944	0.276944	0.0766977	1.11304	1.82438	1.82438	3.32838	1.74465
	88	2.72	2.89939	4.02987	0.179387	0.179387	0.0321796	1.06595	1.30987	1.30987	1.71577	1.48157
	89	2.45	2.18163	3.20045	-0.26837	0.26837	0.0720225	0.890461	0.75045	0.75045	0.563176	1.30631
	90	2.69	2.79751	4.4796	0.107514	0.107514	0.0115593	1.03997	1.7896	1.7896	3.20267	1.66528
	91	2.34	2.22915	3.47645	-0.110846	0.110846	0.0122869	0.95263	1.13645	1.13645	1.29152	1.48566
	92	2.76	2.61184	4.02859	-0.148164	0.148164	0.0219527	0.946317	1.26859	1.26859	1.60933	1.45964
	93	3.09	2.76162	4.1686	-0.328377	0.328377	0.107831	0.893729	1.0786	1.0786	1.16339	1.34906
	94	2.96	3.48841	5.61555	0.528411	0.528411	0.279218	1.17852	2.65555	2.65555	7.05195	1.89715
	95	2.67	2.52947	4.25591	-0.140525	0.140525	0.0197473	0.947369	1.58591	1.58591	2.51511	1.59397
	96	2.98	2.70642	5.05459	-0.273575	0.273575	0.0748435	0.908196	2.07459	2.07459	4.30394	1.69617
	97	3.07	2.63304	4.69741	-0.436964	0.436964	0.190937	0.857667	1.62741	1.62741	2.64845	1.5301
	98	3.14	3.7525	6.07114	0.612504	0.612504	0.375161	1.19506	2.93114	2.93114	8.59161	1.93349
	99	2.95	3.48293	5.52433	0.532935	0.532935	0.284019	1.18066	2.57433	2.57433	6.62719	1.87266
	100	2.59	3.05063	4.48705	0.46063	0.46063	0.21218	1.17785	1.89705	1.89705	3.59878	1.73245
	101	2.69	2.74719	4.22201	0.0571927	0.0571927	0.003271	1.02126	1.53201	1.53201	2.34705	1.56952
	102	3.1	3.38628	5.12685	0.286282	0.286282	0.0819574	1.09235	2.02685	2.02685	4.10812	1.65382
	103	3.06	3.47635	4.95451	0.416347	0.416347	0.173344	1.13606	1.89451	1.89451	3.58916	1.61912
	104	3.16	3.4403	5.75138	0.280298	0.280298	0.0785667	1.0887	2.59138	2.59138	6.71524	1.82006
	105	3.11	2.68242	4.57195	-0.427578	0.427578	0.182823	0.862515	1.46195	1.46195	2.1373	1.47008
	106	3.23	3.39431	5.79445	0.16431	0.16431	0.0269979	1.05087	2.56445	2.56445	6.57642	1.79395
	107	3.45	3.89868	5.94998	0.448684	0.448684	0.201318	1.13005	2.49998	2.49998	6.24988	1.72463
	108	3.49	3.89643	6.36439	0.406425	0.406425	0.165181	1.11645	2.87439	2.87439	8.26213	1.82361
	109	3.66	3.98985	6.73107	0.329848	0.329848	0.1088	1.09012	3.07107	3.07107	9.43149	1.83909
	110	3.48	4.34974	6.85819	0.869744	0.869744	0.756455	1.24993	3.37819	3.37819	11.4122	1.97075
	111	3.48	3.99642	6.8881	0.516423	0.516423	0.266693	1.1484	3.4081	3.4081	11.6152	1.97934
	112	3.49	4.08558	6.59331	0.595581	0.595581	0.354716	1.17065	3.10331	3.10331	9.63055	1.8892
	113	3.38	3.7617	6.20903	0.381698	0.381698	0.145693	1.11293	2.82903	2.82903	8.00339	1.83699
	114	3.26	3.36633	6.5355	0.106335	0.106335	0.0113071	1.03262	3.2755	3.2755	10.7289	2.00476
	115	3.59	2.94281	5.81286	-0.647194	0.647194	0.418861	0.819723	2.22286	2.22286	4.9411	1.61918
	116	3.73	3.52707	6.56255	-0.202929	0.202929	0.04118	0.945596	2.83255	2.83255	8.02333	1.7594
	117	3.57	3.80991	7.04249	0.239907	0.239907	0.0575556	1.0672	3.47249	3.47249	12.0582	1.97269
	118	3.96	4.43994	7.53533	0.479942	0.479942	0.230344	1.1212	3.57533	3.57533	12.783	1.90286
	119	3.85	4.37086	7.74819	0.520858	0.520858	0.271293	1.13529	3.89819	3.89819	15.1959	2.01252
	120	4.2	4.51821	7.70879	0.318208	0.318208	0.101256	1.07576	3.50879	3.50879	12.3116	1.83543
	121	3.93	4.461	7.83028	0.531	0.531	0.281961	1.13511	3.90028	3.90028	15.2122	1.99244
	122	3.76	4.20335	7.3236	0.443349	0.443349	0.196559	1.11791	3.5636	3.5636	12.6992	1.94777
	123	3.95	3.8947	6.77208	-0.0552995	0.0552995	0.00305804	0.986	2.82208	2.82208	7.96411	1.71445
	124	4.51	5.02777	7.72235	0.517766	0.517766	0.268081	1.1148	3.21235	3.21235	10.3192	1.71227
	125	4.45	4.51725	7.11789	0.0672502	0.0672502	0.00452259	1.01511	2.66789	2.66789	7.11761	1.59952
	126	3.92	4.03116	7.09354	0.111163	0.111163	0.0123573	1.02836	3.17354	3.17354	10.0713	1.80958
	127	3.8	4.28344	7.00081	0.483441	0.483441	0.233715	1.12722	3.20081	3.20081	10.2452	1.84232
	128	3.7	3.93655	6.97608	0.236546	0.236546	0.0559542	1.06393	3.27608	3.27608	10.7327	1.88543
	129	3.83	4.12612	6.83069	0.296123	0.296123	0.0876887	1.07732	3.00069	3.00069	9.00415	1.78347
	130	3.77	4.12003	6.87178	0.350031	0.350031	0.122522	1.09285	3.10178	3.10178	9.62104	1.82275
	131	4.12	4.66702	7.87995	0.547021	0.547021	0.299232	1.13277	3.75995	3.75995	14.1373	1.91261
	132	4	4.17887	7.09502	0.17887	0.17887	0.0319944	1.04472	3.09502	3.09502	9.57915	1.77376
	133	4.23	4.67581	7.98747	0.44581	0.44581	0.198746	1.10539	3.75747	3.75747	14.1186	1.88829
	134	4.36	4.91029	8.53947	0.550292	0.550292	0.302821	1.12621	4.17947	4.17947	17.468	1.95859
	135	3.75	3.85018	7.09767	0.100178	0.100178	0.0100357	1.02671	3.34767	3.34767	11.2069	1.89271
	136	4	4.38532	7.96549	0.385323	0.385323	0.148474	1.09633	3.96549	3.96549	15.7251	1.99137
	137	4.27	4.91002	8.94328	0.64002	0.64002	0.409626	1.14989	4.67328	4.67328	21.8395	2.09444
	138	4.64	4.38753	8.406	-0.252475	0.252475	0.0637434	0.945587	3.766	3.766	14.1827	1.81164
	139	4.65	5.14934	9.01539	0.499345	0.499345	0.249345	1.10739	4.36539	4.36539	19.0566	1.93879
	140	4.75	4.96111	8.94821	0.211115	0.211115	0.0445695	1.04445	4.19821	4.19821	17.625	1.88383
	141	4.69	5.203	8.59585	0.512998	0.512998	0.263167	1.10938	3.90585	3.90585	15.2556	1.8328
	142	4.75	5.17215	9.31102	0.422148	0.422148	0.178209	1.08887	4.56102	4.56102	20.8029	1.96021
	143	4.85	5.18672	9.72166	0.33672	0.33672	0.11338	1.06943	4.87166	4.87166	23.733	2.00446
	144	4.74	5.28362	9.64314	0.543624	0.543624	0.295527	1.11469	4.90314	4.90314	24.0408	2.03442
	145	4.69	5.27597	10.1995	0.585973	0.585973	0.343364	1.12494	5.50948	5.50948	30.3543	2.17473
	146	4.18	3.95631	7.55507	-0.223694	0.223694	0.0500389	0.946485	3.37507	3.37507	11.3911	1.80743
	147	4.89	5.20233	9.80499	0.312331	0.312331	0.0975507	1.06387	4.91499	4.91499	24.1571	2.00511
	148	5.34	5.54445	9.48854	0.204449	0.204449	0.0417995	1.03829	4.14854	4.14854	17.2104	1.77688
	149	5.67	5.61529	10.4035	-0.0547102	0.0547102	0.00299321	0.990351	4.73349	4.73349	22.4059	1.83483
	150	5.47	5.77916	11.1104	0.309163	0.309163	0.0955818	1.05652	5.64037	5.64037	31.8138	2.03115
	151	5.3	5.8724	11.1318	0.572398	0.572398	0.32764	1.108	5.83182	5.83182	34.0101	2.10034
	152	5.12	5.4369	10.6349	0.316902	0.316902	0.100427	1.06189	5.51494	5.51494	30.4146	2.07714
	153	5.21	5.47182	10.3373	0.26182	0.26182	0.0685495	1.05025	5.12728	5.12728	26.289	1.98412
	154	5.12	5.75628	11.5955	0.636282	0.636282	0.404855	1.12427	6.47552	6.47552	41.9324	2.26475
	155	5.17	5.71957	11.8029	0.549567	0.549567	0.302023	1.1063	6.63288	6.63288	43.9951	2.28296
	156	5.46	5.7052	12.057	0.245197	0.245197	0.0601215	1.04491	6.59697	6.59697	43.52	2.20824
	157	6.2	5.85931	12.2781	-0.34069	0.34069	0.116069	0.94505	6.07809	6.07809	36.9432	1.98034
	158	5.26	5.94599	11.8621	0.685992	0.685992	0.470585	1.13042	6.60213	6.60213	43.5882	2.25516
	159	5.11	5.96605	11.7814	0.856046	0.856046	0.732814	1.16752	6.67142	6.67142	44.5078	2.30556
	160	5.17	5.95226	11.6712	0.782263	0.782263	0.611936	1.15131	6.50123	6.50123	42.266	2.25749
	161	5.47	6.21281	12.0993	0.742807	0.742807	0.551763	1.1358	6.62926	6.62926	43.9471	2.21193
	162	5.44	5.57982	11.0427	0.139822	0.139822	0.0195501	1.0257	5.60274	5.60274	31.3907	2.02992
	163	6.25	6.03544	11.9999	-0.214557	0.214557	0.0460345	0.965671	5.74987	5.74987	33.061	1.91998
	164	6.15	6.26944	12.4259	0.119445	0.119445	0.014267	1.01942	6.27587	6.27587	39.3866	2.02047
	165	5.76	6.24788	12.9295	0.487879	0.487879	0.238026	1.0847	7.16947	7.16947	51.4012	2.2447
	166	5.41	6.06398	12.9243	0.653978	0.653978	0.427687	1.12088	7.5143	7.5143	56.4647	2.38897
	167	5.74	6.41446	14.1452	0.674463	0.674463	0.454901	1.1175	8.40524	8.40524	70.648	2.46433
	168	6.38	6.69527	13.8413	0.315268	0.315268	0.0993937	1.04941	7.46126	7.46126	55.6705	2.16948
	169	6.97	6.53557	14.0631	-0.434429	0.434429	0.188728	0.937672	7.09313	7.09313	50.3125	2.01767
	170	7.57	6.72285	13.5976	-0.847154	0.847154	0.71767	0.888091	6.02759	6.02759	36.3319	1.79625
	171	6.84	6.66563	13.2663	-0.174365	0.174365	0.0304033	0.974508	6.42626	6.42626	41.2968	1.93951
	172	6.31	6.37773	14.3481	0.0677258	0.0677258	0.00458679	1.01073	8.03808	8.03808	64.6107	2.27386
	173	5.94	6.38816	14.6471	0.448162	0.448162	0.200849	1.07545	8.70712	8.70712	75.8139	2.46584
	174	5.68	6.72884	14.9418	1.04884	1.04884	1.10007	1.18466	9.26176	9.26176	85.7802	2.63059
	175	5.84	6.28947	14.3179	0.449468	0.449468	0.202022	1.07696	8.47793	8.47793	71.8752	2.4517
	176	5.63	6.29415	14.6964	0.664145	0.664145	0.441089	1.11797	9.06641	9.06641	82.1998	2.61037
	177	6.15	6.31647	14.651	0.166468	0.166468	0.0277116	1.02707	8.50104	8.50104	72.2678	2.38228
	178	6.39	6.5057	14.1997	0.115704	0.115704	0.0133874	1.01811	7.80971	7.80971	60.9915	2.22218
	179	6.64	6.30167	14.1638	-0.338329	0.338329	0.114466	0.949047	7.52378	7.52378	56.6073	2.1331
	180	6.98	6.38468	14.2042	-0.595316	0.595316	0.354401	0.914711	7.2242	7.2242	52.1891	2.03499
	181	6.13	6.36554	14.1832	0.235537	0.235537	0.0554776	1.03842	8.05318	8.05318	64.8537	2.31373
	182	6.6	6.33596	14.3229	-0.264044	0.264044	0.0697193	0.959993	7.72289	7.72289	59.643	2.17013
	183	6.31	6.3443	14.4103	0.0342972	0.0342972	0.0011763	1.00544	8.10028	8.10028	65.6146	2.28372
	184	5.97	6.12767	12.5	0.15767	0.15767	0.0248598	1.02641	6.53003	6.53003	42.6413	2.09381
	185	6.85	6.59021	14.7327	-0.259785	0.259785	0.0674883	0.962075	7.88275	7.88275	62.1377	2.15077
	186	6.59	6.68565	13.9514	0.095651	0.095651	0.00914911	1.01451	7.3614	7.3614	54.1901	2.11706
	187	5.88	6.50238	14.2617	0.622376	0.622376	0.387351	1.10585	8.38171	8.38171	70.2531	2.42546
	188	5.74	6.37091	12.9585	0.630913	0.630913	0.398051	1.10992	7.21846	7.21846	52.1061	2.25757
	189	6.48	6.84157	15.8938	0.361573	0.361573	0.130735	1.0558	9.41379	9.41379	88.6195	2.45275
	190	6.43	6.68422	15.5778	0.254219	0.254219	0.0646272	1.03954	9.14783	9.14783	83.6828	2.42268
	191	6.25	6.63094	15.3685	0.380943	0.380943	0.145117	1.06095	9.11851	9.11851	83.1472	2.45896
	192	6.26	6.60899	14.7817	0.348989	0.348989	0.121794	1.05575	8.52169	8.52169	72.6192	2.36129
	193	6.15	6.48637	14.6557	0.336373	0.336373	0.113147	1.05469	8.5057	8.5057	72.347	2.38304
	194	5.98	6.52726	14.398	0.547265	0.547265	0.299499	1.09152	8.41802	8.41802	70.863	2.4077
	195	6.05	6.38738	12.9569	0.337384	0.337384	0.113828	1.05577	6.90686	6.90686	47.7047	2.14163
	196	6.43	6.2987	12.998	-0.1313	0.1313	0.0172396	0.97958	6.56803	6.56803	43.1391	2.02147
	197	6.22	6.37374	14.6921	0.153745	0.153745	0.0236374	1.02472	8.4721	8.4721	71.7765	2.36207
	198	5.83	6.37544	13.5648	0.545442	0.545442	0.297507	1.09356	7.73484	7.73484	59.8278	2.32673
	199	5.75	6.42245	13.901	0.672446	0.672446	0.452183	1.11695	8.15102	8.15102	66.4391	2.41757
	200	5.74	6.59151	14.8416	0.851509	0.851509	0.725068	1.14835	9.10161	9.10161	82.8393	2.58565
	201	5.43	6.42379	13.5023	0.993791	0.993791	0.98762	1.18302	8.07227	8.07227	65.1615	2.48661
	202	5.37	6.21501	13.7799	0.845007	0.845007	0.714037	1.15736	8.40986	8.40986	70.7258	2.56608
	203	5.91	6.45801	13.3993	0.548015	0.548015	0.30032	1.09273	7.48929	7.48929	56.0895	2.26722
	204	6.78	6.12525	12.7784	-0.654752	0.654752	0.4287	0.903429	5.99841	5.99841	35.981	1.88472
	205	6.86	5.96037	12.839	-0.899634	0.899634	0.809341	0.868858	5.97902	5.97902	35.7487	1.87158
	206	6.13	6.18675	13.4861	0.0567515	0.0567515	0.00322073	1.00926	7.35605	7.35605	54.1115	2.20001
	207	6.11	5.84541	13.0547	-0.264589	0.264589	0.0700075	0.956696	6.94466	6.94466	48.2284	2.13661
	208	5.69	5.87228	13.059	0.182284	0.182284	0.0332273	1.03204	7.36903	7.36903	54.3026	2.29508
	209	6.11	5.73808	13.0673	-0.371917	0.371917	0.138322	0.93913	6.95727	6.95727	48.4036	2.13867
	210	6.4	5.64416	12.4295	-0.755843	0.755843	0.571299	0.8819	6.0295	6.0295	36.3549	1.94211
	211	5.9	5.86386	12.4667	-0.0361353	0.0361353	0.00130576	0.993875	6.56666	6.56666	43.1211	2.11299
	212	5.56	6.11932	14.0998	0.559316	0.559316	0.312834	1.1006	8.53982	8.53982	72.9286	2.53594
	213	4.98	5.36808	12.4211	0.388079	0.388079	0.150605	1.07793	7.4411	7.4411	55.3699	2.4942
	214	5.57	5.89653	12.2766	0.326535	0.326535	0.106625	1.05862	6.7066	6.7066	44.9784	2.20406
	215	5.97	5.75864	12.6973	-0.21136	0.21136	0.0446729	0.964596	6.72733	6.72733	45.2569	2.12686
	216	5.82	5.63894	12.6408	-0.181062	0.181062	0.0327835	0.96889	6.82075	6.82075	46.5227	2.17195
	217	5.86	5.66222	12.11	-0.197781	0.197781	0.0391174	0.966249	6.25003	6.25003	39.0628	2.06656
	218	6.06	5.66723	12.1801	-0.392765	0.392765	0.154265	0.935187	6.12012	6.12012	37.4559	2.00992
	219	6.34	5.63236	11.4404	-0.70764	0.70764	0.500754	0.888385	5.10041	5.10041	26.0142	1.80448
	220	5.82	5.25928	11.0481	-0.560716	0.560716	0.314403	0.903657	5.22809	5.22809	27.3329	1.8983
	221	5.56	5.16878	10.2468	-0.391215	0.391215	0.153049	0.929638	4.68676	4.68676	21.9657	1.84294
	222	5.41	5.70202	11.9925	0.292024	0.292024	0.0852779	1.05398	6.58252	6.58252	43.3295	2.21673
	223	5.87	5.66871	12.2321	-0.201292	0.201292	0.0405183	0.965708	6.36214	6.36214	40.4769	2.08384
	224	5.3	5.87347	12.2025	0.573469	0.573469	0.328867	1.1082	6.90247	6.90247	47.6441	2.30235
	225	5.2	5.85413	12.2637	0.654133	0.654133	0.427891	1.12579	7.06372	7.06372	49.8961	2.35841
	226	5.8	5.69955	11.8577	-0.100448	0.100448	0.0100897	0.982681	6.05767	6.05767	36.6954	2.04443
	227	5.67	5.55827	11.5347	-0.11173	0.11173	0.0124835	0.980295	5.86472	5.86472	34.395	2.03434
	228	5.25	5.30109	10.7405	0.0510878	0.0510878	0.00260996	1.00973	5.49046	5.49046	30.1452	2.0458
	229	5.8	5.68287	11.1824	-0.11713	0.11713	0.0137193	0.979805	5.3824	5.3824	28.9702	1.928
	230	5.52	5.42194	11.0419	-0.0980602	0.0980602	0.00961581	0.982235	5.52192	5.52192	30.4916	2.00035
	231	5.01	5.29063	11.0053	0.280628	0.280628	0.0787518	1.05601	5.99528	5.99528	35.9434	2.19666
	232	4.57	5.32184	10.2728	0.751843	0.751843	0.565267	1.16452	5.70279	5.70279	32.5218	2.24788
	233	4.58	4.79911	10.0927	0.219115	0.219115	0.0480114	1.04784	5.51273	5.51273	30.3902	2.20365
	234	4.83	5.22959	10.8568	0.399592	0.399592	0.159674	1.08273	6.02678	6.02678	36.322	2.24778
	235	4.55	4.45586	9.29348	-0.0941446	0.0941446	0.00886321	0.979309	4.74348	4.74348	22.5006	2.04252
	236	4.34	3.30337	7.03183	-1.03663	1.03663	1.0746	0.761145	2.69183	2.69183	7.24597	1.62024
	237	4.14	4.03858	8.29279	-0.101422	0.101422	0.0102864	0.975502	4.15279	4.15279	17.2457	2.00309
	238	4.84	4.56409	9.53975	-0.275908	0.275908	0.0761251	0.942994	4.69975	4.69975	22.0876	1.97102
	239	4.84	4.55664	9.68203	-0.283357	0.283357	0.0802914	0.941455	4.84203	4.84203	23.4453	2.00042
	240	4.49	4.455	9.41516	-0.0349955	0.0349955	0.00122469	0.992206	4.92516	4.92516	24.2572	2.09692
	241	4.12	4.31624	9.33965	0.196244	0.196244	0.0385117	1.04763	5.21965	5.21965	27.2448	2.26691
	242	4.23	4.50977	9.93984	0.279774	0.279774	0.0782734	1.06614	5.70984	5.70984	32.6023	2.34984
	243	4.33	4.86467	10.0466	0.534671	0.534671	0.285873	1.12348	5.71658	5.71658	32.6793	2.32023
	244	4.43	4.54001	9.75703	0.110005	0.110005	0.0121011	1.02483	5.32703	5.32703	28.3772	2.20249
	245	4.42	4.69724	10.4683	0.277237	0.277237	0.0768606	1.06272	6.04827	6.04827	36.5815	2.36839
	246	4.4	4.62752	10.0715	0.227522	0.227522	0.0517663	1.05171	5.67153	5.67153	32.1663	2.28898
	247	4.36	4.73599	9.99097	0.375988	0.375988	0.141367	1.08624	5.63097	5.63097	31.7079	2.29151
	248	4.3	4.19111	8.77147	-0.108888	0.108888	0.0118565	0.974677	4.47147	4.47147	19.994	2.03988
	249	4.1	4.18263	8.726	0.0826275	0.0826275	0.0068273	1.02015	4.626	4.626	21.3999	2.12829
	250	4.34	4.08781	8.8765	-0.252185	0.252185	0.0635973	0.941893	4.5365	4.5365	20.5798	2.04528
	251	4.47	4.39036	9.94469	-0.0796357	0.0796357	0.00634184	0.982184	5.47469	5.47469	29.9723	2.22476
	252	4.08	3.99445	8.87996	-0.0855492	0.0855492	0.00731867	0.979032	4.79996	4.79996	23.0397	2.17646
	253	3.8	4.21976	8.66673	0.419762	0.419762	0.1762	1.11046	4.86673	4.86673	23.685	2.28072
	254	3.65	4.28689	9.15653	0.636889	0.636889	0.405628	1.17449	5.50653	5.50653	30.3218	2.50864
	255	3.57	4.17978	8.79811	0.609783	0.609783	0.371836	1.17081	5.22811	5.22811	27.3331	2.46446
	256	4.03	3.95285	8.09497	-0.077154	0.077154	0.00595274	0.980855	4.06497	4.06497	16.524	2.00868
	257	3.8	3.6368	8.58409	-0.1632	0.1632	0.0266341	0.957053	4.78409	4.78409	22.8875	2.25897
	258	3.55	3.88392	9.08685	0.333919	0.333919	0.111502	1.09406	5.53685	5.53685	30.6567	2.55968
	259	3.59	3.86999	9.60604	0.279991	0.279991	0.0783949	1.07799	6.01604	6.01604	36.1928	2.67578
	260	4.05	3.80409	9.52719	-0.245906	0.245906	0.0604697	0.939283	5.47719	5.47719	29.9996	2.35239
	261	3.81	3.78058	9.47821	-0.0294175	0.0294175	0.00086539	0.992279	5.66821	5.66821	32.1286	2.48772
	262	3.84	3.81328	8.89501	-0.026721	0.026721	0.000714012	0.993041	5.05501	5.05501	25.5531	2.31641
	263	3.14	3.46636	7.76427	0.326361	0.326361	0.106512	1.10394	4.62427	4.62427	21.3839	2.4727
	264	3.04	3.3424	7.20115	0.302397	0.302397	0.0914438	1.09947	4.16115	4.16115	17.3151	2.3688
	265	2.99	3.49825	7.2629	0.508252	0.508252	0.258321	1.16998	4.2729	4.2729	18.2577	2.42906
	266	2.71	1.971	4.11699	-0.738997	0.738997	0.546117	0.727307	1.40699	1.40699	1.97962	1.51918
	267	3.16	3.55385	7.13031	0.393847	0.393847	0.155115	1.12463	3.97031	3.97031	15.7634	2.25643
	268	2.78	3.04522	6.80608	0.265222	0.265222	0.0703427	1.0954	4.02608	4.02608	16.2094	2.44823
	269	2.81	2.87472	6.56087	0.0647165	0.0647165	0.00418823	1.02303	3.75087	3.75087	14.069	2.33483
	270	2.95	2.61913	6.15886	-0.330869	0.330869	0.109474	0.887841	3.20886	3.20886	10.2968	2.08775
	271	2.83	2.66881	6.11111	-0.161193	0.161193	0.0259831	0.943041	3.28111	3.28111	10.7657	2.1594
	272	2.76	3.10016	7.16951	0.340162	0.340162	0.11571	1.12325	4.40951	4.40951	19.4438	2.59765
	273	2.67	2.50623	5.30956	-0.163768	0.163768	0.02682	0.938664	2.63956	2.63956	6.96727	1.9886
	274	2.72	2.65675	5.38152	-0.063248	0.063248	0.00400031	0.976747	2.66152	2.66152	7.08371	1.9785
	275	2.73	3.38111	6.68467	0.651114	0.651114	0.42395	1.2385	3.95467	3.95467	15.6394	2.4486
	276	2.61	2.65836	5.33348	0.0483602	0.0483602	0.00233871	1.01853	2.72348	2.72348	7.41735	2.04348
	277	2.53	2.6428	5.27011	0.112798	0.112798	0.0127233	1.04458	2.74011	2.74011	7.50821	2.08305
	278	2.42	2.60162	5.40588	0.181623	0.181623	0.0329868	1.07505	2.98588	2.98588	8.91547	2.23383
	279	2.46	2.66475	5.48223	0.204752	0.204752	0.0419234	1.08323	3.02223	3.02223	9.13386	2.22855
	280	2.51	2.60146	5.27273	0.0914577	0.0914577	0.0083645	1.03644	2.76273	2.76273	7.63267	2.10069
	281	2.42	2.43653	4.8904	0.0165342	0.0165342	0.000273381	1.00683	2.4704	2.4704	6.10289	2.02083
	282	2.33	2.98031	5.91186	0.650314	0.650314	0.422908	1.2791	3.58186	3.58186	12.8297	2.53728
	283	2.19	2.58465	5.0835	0.39465	0.39465	0.155749	1.18021	2.8935	2.8935	8.37232	2.32123
	284	2.03	2.15503	4.15723	0.125027	0.125027	0.0156317	1.06159	2.12723	2.12723	4.5251	2.0479
	285	2.24	2.32859	4.71493	0.0885878	0.0885878	0.0078478	1.03955	2.47493	2.47493	6.1253	2.10488
	286	2.33	2.74388	5.34096	0.413881	0.413881	0.171298	1.17763	3.01096	3.01096	9.06587	2.29226
	287	2.2	2.50827	4.90407	0.308269	0.308269	0.0950295	1.14012	2.70407	2.70407	7.31197	2.22912
	288	2.31	2.04705	4.0504	-0.262955	0.262955	0.0691453	0.886167	1.7404	1.7404	3.029	1.75342
	289	2.4	2.14802	4.23403	-0.251984	0.251984	0.0634958	0.895007	1.83403	1.83403	3.36366	1.76418
	290	2.33	2.2209	4.97627	-0.109103	0.109103	0.0119036	0.953175	2.64627	2.64627	7.00273	2.13574
	291	1.98	2.50942	5.15207	0.529422	0.529422	0.280287	1.26738	3.17207	3.17207	10.062	2.60205
	292	1.93	2.4518	4.84603	0.521798	0.521798	0.272273	1.27036	2.91603	2.91603	8.50324	2.5109
	293	1.99	2.16402	4.19263	0.174021	0.174021	0.0302832	1.08745	2.20263	2.20263	4.85156	2.10685
	294	2.06	2.32043	4.36805	0.26043	0.26043	0.0678235	1.12642	2.30805	2.30805	5.32709	2.12041
	295	1.7	1.63528	3.16044	-0.064722	0.064722	0.00418893	0.961928	1.46044	1.46044	2.1329	1.85908
	296	1.62	1.97977	3.8068	0.359767	0.359767	0.129432	1.22208	2.1868	2.1868	4.78212	2.34988
	297	1.58	1.95359	3.50666	0.373588	0.373588	0.139568	1.23645	1.92666	1.92666	3.71201	2.2194
	298	1.64	2.12058	3.51223	0.48058	0.48058	0.230957	1.29304	1.87223	1.87223	3.50525	2.1416
	299	1.66	1.9415	3.28391	0.281498	0.281498	0.0792414	1.16958	1.62391	1.62391	2.63708	1.97826
	300	1.6	1.65842	2.86238	0.0584156	0.0584156	0.00341239	1.03651	1.26238	1.26238	1.59359	1.78898
	301	1.52	1.59533	2.94291	0.0753347	0.0753347	0.00567532	1.04956	1.42291	1.42291	2.02468	1.93613
	302	1.65	1.54507	2.6529	-0.104932	0.104932	0.0110106	0.936405	1.0029	1.0029	1.0058	1.60782
	303	1.64	1.88642	2.99501	0.246423	0.246423	0.0607242	1.15026	1.35501	1.35501	1.83605	1.82622
	304	1.53	1.89373	3.02265	0.363733	0.363733	0.132302	1.23773	1.49265	1.49265	2.228	1.97559
	305	1.57	2.02637	3.45226	0.456374	0.456374	0.208277	1.29068	1.88226	1.88226	3.54291	2.19889
	306	1.48	1.75877	3.10657	0.278772	0.278772	0.077714	1.18836	1.62657	1.62657	2.64573	2.09903
	307	1.51	1.66936	2.69481	0.159365	0.159365	0.0253972	1.10554	1.18481	1.18481	1.40378	1.78464
	308	1.45	1.66925	2.61591	0.219255	0.219255	0.0480726	1.15121	1.16591	1.16591	1.35934	1.80407
	309	1.24	1.53463	2.44953	0.294633	0.294633	0.0868084	1.23761	1.20953	1.20953	1.46296	1.97543
	310	1.34	1.66863	2.80249	0.328634	0.328634	0.108001	1.24525	1.46249	1.46249	2.13889	2.09141
	311	1.39	1.69554	2.92531	0.305543	0.305543	0.0933568	1.21982	1.53531	1.53531	2.35718	2.10454
	312	1.22	1.48858	2.49999	0.268575	0.268575	0.0721328	1.22014	1.27999	1.27999	1.63838	2.04917
	313	1.32	1.36128	2.28733	0.0412762	0.0412762	0.00170373	1.03127	0.967332	0.967332	0.935732	1.73283
	314	1.5	1.51536	2.52069	0.0153576	0.0153576	0.000235855	1.01024	1.02069	1.02069	1.04182	1.68046
	315	1.47	1.5206	2.48175	0.0505996	0.0505996	0.00256032	1.03442	1.01175	1.01175	1.02363	1.68826
	316	1.37	1.471	2.43268	0.101005	0.101005	0.0102019	1.07373	1.06268	1.06268	1.12929	1.77568
	317	1.1	1.12731	1.95474	0.0273141	0.0273141	0.000746058	1.02483	0.85474	0.85474	0.73058	1.77704
	318	1.03	1.26404	2.16437	0.234041	0.234041	0.054775	1.22722	1.13437	1.13437	1.28679	2.10133
	319	1.1	1.3617	2.3397	0.2617	0.2617	0.0684867	1.23791	1.2397	1.2397	1.53685	2.127
	320	1.03	1.40872	2.30511	0.378718	0.378718	0.143428	1.36769	1.27511	1.27511	1.62591	2.23797
	321	1	1.47804	2.23747	0.478037	0.478037	0.228519	1.47804	1.23747	1.23747	1.53133	2.23747
	322	1.03	1.29898	1.98242	0.268977	0.268977	0.0723485	1.26114	0.952425	0.952425	0.907113	1.92468
	323	0.84	0.990676	1.55789	0.150676	0.150676	0.0227034	1.17938	0.717893	0.717893	0.51537	1.85463
	324	0.84	0.915345	1.52086	0.0753454	0.0753454	0.00567693	1.0897	0.680864	0.680864	0.463576	1.81055
	325	0.95	0.985583	1.58542	0.0355834	0.0355834	0.00126618	1.03746	0.635417	0.635417	0.403755	1.66886
	326	0.91	0.862003	1.3957	-0.0479966	0.0479966	0.00230367	0.947257	0.485699	0.485699	0.235903	1.53373
	327	0.89	0.868473	1.45551	-0.0215265	0.0215265	0.000463392	0.975813	0.565512	0.565512	0.319804	1.63541
	328	1.03	1.19743	1.89181	0.16743	0.16743	0.0280329	1.16255	0.861814	0.861814	0.742724	1.83671
	329	0.95	0.991656	1.45997	0.0416563	0.0416563	0.00173525	1.04385	0.509969	0.509969	0.260069	1.53681
	330	0.82	1.09589	1.68862	0.275894	0.275894	0.0761178	1.33646	0.868617	0.868617	0.754495	2.05929
	331	0.81	1.31828	1.81748	0.508275	0.508275	0.258344	1.6275	1.00748	1.00748	1.01502	2.24381
	332	0.84	0.677869	1.00814	-0.162131	0.162131	0.0262865	0.806987	0.168135	0.168135	0.0282695	1.20016
	333	0.85	0.829826	1.31863	-0.0201745	0.0201745	0.000407008	0.976265	0.468626	0.468626	0.219611	1.55133
	334	0.73	1.0434	1.47381	0.313401	0.313401	0.0982201	1.42932	0.743811	0.743811	0.553255	2.01892
	335	0.76	1.17451	1.61608	0.414512	0.414512	0.17182	1.54541	0.856077	0.856077	0.732869	2.12642
	336	0.82	1.12426	1.48641	0.30426	0.30426	0.092574	1.37105	0.666407	0.666407	0.444098	1.81269
	337	0.91	1.05134	1.35486	0.141343	0.141343	0.0199779	1.15532	0.444864	0.444864	0.197904	1.48886
	338	0.69	0.993885	1.00013	0.303885	0.303885	0.092346	1.44041	0.310134	0.310134	0.0961833	1.44947
	339	0.8	1.06669	1.1471	0.266688	0.266688	0.0711225	1.33336	0.347104	0.347104	0.120481	1.43388
	340	0.92	0.960183	1.09003	0.0401826	0.0401826	0.00161464	1.04368	0.170029	0.170029	0.0289097	1.18481
	341	0.72	0.902011	0.940898	0.182011	0.182011	0.033128	1.25279	0.220898	0.220898	0.048796	1.3068
	342	0.71	0.890447	0.91346	0.180447	0.180447	0.0325612	1.25415	0.20346	0.20346	0.0413959	1.28656
	343	0.74	0.444128	0.513102	-0.295872	0.295872	0.0875403	0.600173	-0.226898	0.226898	0.0514828	0.693381
	344	0.74	0.767109	0.799377	0.0271093	0.0271093	0.000734915	1.03663	0.0593768	0.0593768	0.00352561	1.08024
	345	0.65	0.971224	0.919059	0.321224	0.321224	0.103185	1.49419	0.269059	0.269059	0.0723928	1.41394
	346	0.67	1.04666	0.909539	0.376658	0.376658	0.141871	1.56218	0.239539	0.239539	0.057379	1.35752
	347	0.71	0.929181	0.664043	0.219181	0.219181	0.0480405	1.30871	-0.0459575	0.0459575	0.00211209	0.935271
	348	0.73	0.938094	0.786891	0.208094	0.208094	0.0433032	1.28506	0.0568908	0.0568908	0.00323657	1.07793
	349	0.67	0.921468	0.831819	0.251468	0.251468	0.0632364	1.37533	0.161819	0.161819	0.0261854	1.24152
	350	0.63	0.818243	0.594922	0.188243	0.188243	0.0354353	1.2988	-0.0350776	0.0350776	0.00123044	0.944321
	351	0.73	0.889591	0.596374	0.159591	0.159591	0.0254694	1.21862	-0.133626	0.133626	0.017856	0.81695
	352	0.83	0.929478	0.505071	0.0994785	0.0994785	0.00989596	1.11985	-0.324929	0.324929	0.105579	0.608519
	353	0.85	0.822795	-0.0335747	-0.0272053	0.0272053	0.000740128	0.967994	-0.883575	0.883575	0.780704	-0.0394997
	354	0.94	0.877344	0.00243654	-0.0626561	0.0626561	0.00392579	0.933345	-0.937563	0.937563	0.879025	0.00259206
	355	0.92	0.524022	-0.332375	-0.395978	0.395978	0.156799	0.569589	-1.25237	1.25237	1.56844	-0.361277
	356	0.71	0.433567	-0.446692	-0.276433	0.276433	0.0764151	0.610658	-1.15669	1.15669	1.33794	-0.629144
	357	0.69	0.54693	0.0206874	-0.14307	0.14307	0.0204692	0.792651	-0.669313	0.669313	0.447979	0.0299818
	358	0.72	0.491867	-0.111613	-0.228133	0.228133	0.0520447	0.683148	-0.831613	0.831613	0.69158	-0.155018
	359	0.7	0.812085	0.0479494	0.112085	0.112085	0.0125631	1.16012	-0.652051	0.652051	0.42517	0.0684992
	360	0.75	0.764391	0.280012	0.0143913	0.0143913	0.000207108	1.01919	-0.469988	0.469988	0.220889	0.373349
	361	0.76	0.717016	0.68611	-0.042984	0.042984	0.00184763	0.943442	-0.0738899	0.0738899	0.00545972	0.902776
	362	0.73	0.744737	0.445293	0.0147366	0.0147366	0.000217168	1.02019	-0.284707	0.284707	0.081058	0.60999
	363	0.69	0.443656	0.0165211	-0.246344	0.246344	0.0606855	0.642979	-0.673479	0.673479	0.453574	0.0239436
	364	0.84	0.891053	0.791635	0.0510534	0.0510534	0.00260645	1.06078	-0.0483649	0.0483649	0.00233916	0.942423
	365	0.75	0.549514	0.579609	-0.200486	0.200486	0.0401945	0.732686	-0.170391	0.170391	0.029033	0.772812
	toplam	1121.57	1183.41	2222.1	61.8421	109.482	49.2432	397.376	1100.53	1152.93	6182.34	628.226
	Ort.	3.07279	3.24222	6.08795	hs-pm	Mutlak değer (hs-pm)	(hs-pm)2	hs/pm	Turc-pm	Mutlak değer (Turc-pm)	(Turc-pm)2	Turc/pm
						HS-PM	Turc-PM
					RMSE (mm/day)	0.367305	4.11557
					MAE (mm)	0.299952	3.1587
					MR	1.0887	1.72117
					PE (%)	5.51388	98.1243
					R2
