# Supplementary material for: Assessing of evapotranspiration models using limited climatic data in Southeast Anatolian Project Region of Turkey
Source: PeerJ. 2021 Jun 9;9:e11571. doi: 10.7717/peerj.11571 (PMC8197036; doi:10.7717/peerj.11571)
Supplement: Supplemental Information 10 — Figures used in this study collected in one file. [file peerj-09-11571-s010.xlsx]

## Sheet: Sayfa1
		Monthly Averages		ETo-HS				Monthly Averages		ETo-Turc				Monthly Averages	ETo-PM
		Kilis	Diyarbakır	Mardin	Batman			Kilis	Diyarbakır	Mardin	Batman			Kilis	Diyarbakır	Mardin	Batman
	Jan	1.43637	1.23698	1.0956	0.902591		Jan	1.26648	1.29632	0.744497	0.573081		Jan	0.899032	0.872258	0.883548	0.754839
	Feb	2.49781	2.05845	1.77028	1.44761		Feb	2.84965	2.46944	1.44361	1.31563		Feb	1.63484	1.46484	1.59742	1.26194
	Mar	3.58645	3.02446	2.68978	2.44276		Mar	4.78309	4.23437	2.96268	3.53861		Mar	2.75613	2.54323	2.50484	2.24613
	Apr	4.40699	4.86942	3.36594	3.42335		Apr	6.64656	7.2513	4.45847	5.70388		Apr	3.68516	3.99774	3.58258	3.23161
	May	4.77587	6.1501	4.29843	4.73446		May	7.47095	9.20756	6.1026	8.39943		May	4.30806	5.20419	4.69968	4.41806
	Jun	5.90676	7.51661	6.78613	6.16391		Jun	10.0475	12.533	10.681	12.9626		Jun	5.33258	6.45097	6.04645	5.89645
	Jul	5.83174	7.61776	7.08367	6.3109		Jul	10.2662	13.2655	11.3718	13.83		Jul	5.49065	6.66484	6.41323	6.12129
	Aug	5.0966	5.92301	6.57925	5.17805		Aug	8.07759	9.88582	9.65689	10.8683		Aug	4.41516	5.37645	5.3929	5.1829
	Sep	3.87196	4.41078	4.98061	3.75438		Sep	6.31123	7.89605	7.37579	8.29091		Sep	3.07161	3.8429	3.76194	3.63742
	Oct	2.62278	3.00584	2.77391	2.29082		Oct	4.07492	4.83941	4.08878	4.43222		Oct	2.12387	2.30516	2.17097	2.09226
	Nov	1.8712	1.79392	2.01024	1.3222		Nov	2.69645	2.64486	2.36455	2.14354		Nov	1.28129	1.25742	1.24903	1.13355
	Dec	1.57013	1.50687	1.5331	0.820564		Dec	1.82918	1.8401	1.40018	0.600489		Dec	0.829677	0.817742	0.808065	0.757419

## Sheet: Sayfa2
					ETo-PM
					ETo-HS							Ort.
	Kilis	1078.98	653.381	1249.73	1340.5	1436.06	1336.86	1481.96	1557.25	1490.6	1621.64	1324.7
	Diyarbakır	1451.08	1345.57	1411.07	1347.84	1672.15	1645.21	1396.59	1653.57	1673.34	1399.23	1499.57
	Mardin	1224.72	1487.9	1596.61	1396.66	1207.92	1473.66	1275.6	1044.77	1505.86	1555.36	1376.91
	Batman	1327.31	1279.81	1204.67	1001.29	1319.83	1161.74	1038.62	1309.19	1173.1	1018.55	1183.41
					Turc
	Kilis	1700.57	1064.33	1944.62	1966.63	2173.03	2104.49	2241.01	2229.61	2274.01	2575.36	2027.36
	Diyarbakır	2284.1	2078.92	2139.95	1972.83	2740.31	2699.53	2259.73	2625.3	2613.4	2231.41	2364.55
	Mardin	1675.53	2277.52	2024.96	1994.94	1650.79	1992.49	1875.74	1498.79	2178.59	2027.7	1919.71
	Batman	2331.63	2250.44	2168.56	1746.23	2592.81	2275.19	2063.86	2524.04	2297.82	1964.66	2221.52
			ETo-PM	ETo-HS	ETo-Turc	% Change	% change	% change
						HS-Turc	PM-HS	PM-Turc
		Kilis	1094.2	1324.7	2027.36	53.0438	21.0652	85.2828
		Diyarbakır	1246	1499.57	2364.55	57.6822	20.3504	89.7711
		Mardin	1195.1	1376.91	1919.71	39.4217	15.2126	60.6313
		Batman	1121.6	1183.41	2221.52	87.7219	5.51106	98.0674
						59.4674	15.5348	83.4382
